# Supplementary material for: An organ-on-chip model of pulmonary arterial hypertension identifies a BMPR2-SOX17-prostacyclin signalling axis
Source: Commun Biol. 2022 Nov 7;5:1192. doi: 10.1038/s42003-022-04169-z (PMC9640600; doi:10.1038/s42003-022-04169-z)
Supplement: Supplementary file 5 — Supplementary Data 2 [file 42003_2022_4169_MOESM5_ESM.xlsx]

## Sheet: Sheet1
HPAEC UNIQUE in disease signature (not in BMPR2)	HPASMCs unique (in double hit but not in BMPR2)	ECFCs UNIQUE in DOUBLE hit (not in normoxic ECFCs)	HPASMCs
AHCYL2	CA12	MT1X	MFSD9
FASTKD1	ENO2	MT2A	ENO2
TNFAIP3	ZNF395	LRRC70	DCAF16
POLDIP3	SERPINB2	MT1E	EFNA5
C12orf49	ALDOC	RPL21P16	TULP4
BTBD11	EGLN1	FKBP4	TF
IQGAP1	PDK3	POLR3D	LINC02503
DFFBP1	ITPR1	UPP1	BNIP3
SHC3	ALPK2	CTNNAL1	TIMM23B
LINC00205	AK4	ANXA6	PLOD2
BTN3A1	ORAI3	RALBP1	KCNQ1OT1
GCSHP5	BCYRN1	PIEZO1	FANCC
TRIM73	NOP2	MIR1915HG	SLC25A44
SIRT5	PSAT1	XRN1	BRCA2
CEP290	H2AC6	RWDD1	CENPU
GPC2	ALG14	LUC7L3	ZXDA
MFSD11	PPP1R3G	HES4	LDHA
BSCL2	PLXNA2	EIF3J	SLC26A4-AS1
C1R	SRD5A3	MINDY2	LYRM9
ADAM23	SMIM10L2A	YWHAE	GBE1
ZNF550	H2AC19	EEF1D	CCDC134
PSPH	NOL3	ENO2	TMEFF1
TNFAIP2	QPCT	UBE2S	PCDH9
CYB5D1	EFNA3	LAMB2	CHST3
RAD18	ZNF385A	MPHOSPH8	H2BC5
HOXB7	HSPA6	HSPH1	ZNF395
KCNH4	NECTIN1	TMEM158	ZNF174
HMGN4	FGF11	TPI1	NMNAT3
KRCC1	FUT11	RBM3	PFKFB4
SPIDR	RGS4	HDLBP	CCN3
USP32P2	STEAP2	CSE1L	MED24
UQCR11	SMG1P5	EIF4A2	MDM4
ZNF605	PTGIS	ZC3H15	TMEM119
ZNF251	B3GALT4	SELENOM	DAAM1
SYN2	TIGAR	NR2F6	ALG1
OXSR1	GBE1	CHD3	P4HA1
KIAA0895	TAPBP	HNRNPC	TTTY10
FMC1-LUC7L2	MFAP4	STUB1	KMT2C
FBXO38	SH3D21	HYI	AEN
SMARCD1	HCFC1R1	ZC3H13	LRIG2
ZFHX3	SAMD14	ADA	TFCP2
TENT4A	AMOT	MIB2	CENPI
PLXND1	PDK1	IER5L	LINC01608
ZNF561	GPR146	ALDOA	LINC01609
THOC6	NOP56	SFT2D2	LINC00205
RTN1	KBTBD8	TOR1AIP2	GOT1
C2orf27A	ATP6V0D2	P4HA1	NCAPG
ZNF101	C1orf50	PGM1	B4GALNT1
FST	GINS4	C12orf57	APOBEC3B
FTX	DARS1	SSU72	HIF1A-AS3
NUP98	C15orf48	HSPA8	DDX60
TRAM2-AS1	ATP11C	MMS19	SHPRH
TMEM185A	SLC43A3	EIF2S2	LINC00343
DNAJC19	GAL3ST4	LDHA	KCTD12
GTF3C1	DKC1	HSP90AB1	PPP1R13L
C19orf44	DNER	ZFR	TAF9B
FGF5	CDCP1	PPA1	ALDOC
PNN	SCRG1	NANS	ARVCF
PCF11	LINC01444	SERP1	PASK
PAWR	HSD17B14	GDI2	PLIN2
PLK4	PPP1R3C	ST6GALNAC4	ZNF708
ELFN2	FXYD6	RO60	TMEM45A
HERC2P3	C19orf47	CXCL8	ANKZF1
KIAA1586	SLC25A1	COASY	IRF9
BAALC-AS1	PER1	WTIP	DZIP3
KCNK3	CSPG4	LSM12	ARMH4
NRBP2	RHOJ	SEC62	C12orf50
HBG2	SPOUT1	DPYSL2	C11orf95
GAS2L1	SCARB1	H2AX	RPTOR
MRPL45P2	PSG4	ARID5B	PDE4C
CLOCK	IL36RN	BORCS6	SLC16A3
EGR1	HPS3	SPR	IFIT1
SENP1	H2AZ1	SLX4IP	MAD2L1
C11orf71	RIN2	HSPA1B	LUCAT1
MLF1	PAQR8	KIF20B	FBRSL1
SMIM14	PITHD1	HSPA1A	PRR14L
TERF2	PSME4	SUGT1	ADAMTS14
CHD9	ENTPD7	MRPS5	EGLN1
WDR6	TGFB3	BAG4	ZNF764
ZNF382	SPAG4	THAP11	KSR1
TNPO3	DUSP2	SLC35E1	TNFRSF21
WASH5P	RASSF4	BCYRN1	NOLC1
AP1G1	TFDP1	GOLGA6L4	ZC3H6
NUP85	SH3BP5L	RPL13A	RGPD5
EIF3CL	MAFB	HSF1	TANC1
PARN	GPR1	HILPDA	CEP131
HBB	SLC7A5	TPX2	THEMIS2
CEBPB	ALDH6A1	PPP1CB	CTPS1
FBXO10	ZNF530	CTNNBL1	CUBN
UBFD1	IL36B	NDUFV1	APC
ZNF331	PFKFB4	RRAD	BDH1
POU2F1	PHGDH	VTI1B	PRPS1
CYP46A1	MXI1	DHX9	WASHC2A
PAFAH2	ITGA11	DNAJB1	RAB7B
LRFN3	TPP1	CDC34	MYLK
WDR60	COL8A2	ENDOG	FEN1
TMEM68	IRF2BP2	HSPA5	CCN2
POLQ	CCZ1B	HK2	UTP15
TNFSF14	CCDC127	NUP205	RBFADN
C16orf74	SMG6	MANF	TMEM212
UMAD1	KCNMA1	RRM2	WDR91
C22orf46	PLA2G15	DDX50	TMPO
CTSV	RASA3	ST8SIA4	HOXA3
RNF141	RRAGD	SELE	GASK1B
APC2	FEN1	ANKRD37	PLEKHG3
NUDCD3	TMEM109	PREPL	MET
PEX19	MPP2	CCT8	KIAA0513
TMEM54	ARC	CRIP1	GPAT2
IARS1	ZNF703	MIPOL1	RRP1B
KPNA6	HBA2	ALDH1B1	DCAF8
IDH3B	NACAD	SLC27A4	PNO1
STIMATE	ICE2	SNHG29	ZNF283
IVD	FTSJ3	FASN	CPEB1
IFI27L1	H6PD	RPL13	FAM185A
LINC00641	HSD17B10	RPL32P29	MAGEE1
GTF2IRD2B	BAMBI	ZBTB7A	ESCO2
ZNF737	SRPRB	ALDH6A1	GPAT4
VSIR	NDRG1	SERPINB6	ZNF516
RNU6-36P	HK2	SF3B3	DCBLD1
ATP6V1H	AFF2	POLD2	GNG2
CAMK2G	ZNF658	CCDC85B	C4orf47
OPN3	CLDN14	CHORDC1	DHX33
KIF15	DDR1	RPL8	PBK
CEP85	ETV5	RPS3A	LINC00630
LINC02321	H2BC5	APRT	LRP8
TATDN3	NMB	CARS2	POLR1B
CFAP410	GM2A	CKS2	ANKRD35
SLC18B1	MAOA	HPCAL1	SLC8A1
C1orf74	SAT2	PELP1	POLR1A
SEMA4G	TNFSF9	MSL3	AHCTF1
SUCLA2	LAMP3	UNC45A	UGDH-AS1
HBA1	SLC36A1	FANCG	GYS1
TASOR	METTL22	MAP1B	PFAS
AKAP7	EBF1	FLOT1	LINC00622
ARHGDIG	SH3GL1	ISG15	HMCN1
FAM193B	LUC7L	NUP88	ZFP82
PPIL6	ASNS	POR	DGKG
TBRG1	FAM98A	C11orf96	STAT5B
EDA	AGBL5	PHIP	IKZF4
ZNF217	EMP1	AURKAIP1	TAOK2
AKR1C1	STARD4	DNAJC1	TRIP11
GID8	MMRN2	BBX	TIMELESS
HES2	SLC1A5	KDM5A	GATC
P4HA2	STXBP1	KEAP1	GLIPR2
TRAPPC12	S1PR1	POLRMT	SH3RF3
ZNF608	SSPN	PEX6	NDUFA9
STEAP3	CD68	SAMHD1	RAB3D
HDAC4	CENPL	RAP1GDS1	GRAMD4
LINC01003	LEPR	NUCB2	GATAD2A
LINC01534	QSOX1	CCT4	IGIP
LIME1	CNNM2	RELL1	PLCG1
NAA40	DCC	RCC1	PARPBP
TTLL4	RAB8B	SCD	NOL6
NLRP2	FBXO32	INTS13	GPI
GNAO1	GLYR1	TRAP1	ABCB11
WSB1	TMEM199	LDHB	NCDN
CCDC61	ARRDC3	MBD3	PHACTR2
MAP3K5	ZNF668	TRIM69	EPHB2
THADA	FBXO33	GIPC1	NCKIPSD
RNF19A	ARL10	GALK1	NDRG1
VIM-AS1	NARF	TUFM	CDKN2B
CEL	DHX9	MAZ	PMM2
PRKRIP1	ADPRH	PARVB	ARL10
SSBP3	CEP290	CTCF	UHRF1
P3H4	SPRY4	SLC37A3	SLC39A13
TMEM182	LRRC59	TXN2	ZNF717
PLEKHO1	MSX1	DESI1	TMEM117
UBA6-AS1	SLC38A7	NEMF	GEN1
ZNF197	LDHAP3	LIMS4	DLX1
BRI3BP	COL1A1	MTCP1	CACTIN
UBR3	HSD17B7	CEBPZ	TDRP
CLUH	NSUN2	ATOH8	IFI27
LDB2	KCTD5	PDS5B	IL11RA
ZNF528	C1orf122	SHISA5	ZDHHC7
HDDC2	FGF16	NUCKS1	PGM1
POU5F1	FYCO1	EIF3M	PEX10
ANO8	XYLT1	ASF1A	ETFBKMT
ICAM3	ANKRD37	FAM174C	MXD1
GMFB	COL1A2	C18orf54	EMSY
TNS2	TFRC	AAK1	EP400P1
ZNNT1	TTN-AS1	MDH1	EPB41L2
AMACR	NRSN2-AS1	CCT6B	MYBBP1A
CPSF7	PIGV	CCT3	HTT
GRAP	YKT6	MIR22HG	PEX6
ZNF616	SEC23IP	HHIP-AS1	TKFC
ACTR6	SULT1C2	CCNI	FILIP1L
CPNE7	WDR18	PAFAH1B2	CXXC5
CFP	TGM2	NAP1L1	NREP
MVD	CSRNP1	ANLN	ATP9B
PDK3	CLSTN3	FAM162A	CDK1
RPP25L	SULF2	MPST	TP53BP1
CCDC18-AS1	ERMP1	MYL9	SCO1
PRKCD	GTF2IRD2	CCDC174	LMNB2
CARS1	VEGFB	SRPRB	BBS4
SLC44A1	LINC02154	CCDC28B	ARL4A
CHD5	NMRAL2P	NICN1	TMEM192
GTF2H2C	C12orf76	PTMS	ADAM19
CLCN2	GPI	SPTAN1	TSIX
ZNF584	BCLAF1	PEX12	NUDT3
PPP1R37	BCKDHA	ARF6	CKAP2L
PARP1	GLMP	AKR1A1	MAFB
METTL14	PLAU	PLIN2	MED27
MND1	ITPA	EVA1B	CREBBP
SMARCD2	DDX5	CEBPD	ZHX1
MYCBP2	MICA	PRPF40A	CDC45
ASB1	ATP13A2	UVSSA	MYH9
YPEL2	PLCB1	RNPEPL1	NDE1
RGS14	RHBDF1	PDCD2	VEGFC
HNRNPM	LRRC75B	UBC	INKA2
LINC00909	PSPC1	CEP104	POC1A
TOM1	POU2F2	CCDC6	DUS1L
EBLN3P	ATAD3A	SSRP1	FAM86C1
SECISBP2	PITRM1	DDX17	PHTF1
FAM217B	C4orf3	ZPR1	H4C8
ANKRD36	SNHG14	YWHAB	SIK1
LRRK1	PNPT1	STK17B	SKA1
SOWAHC	ZNF277	KLF16	NEIL3
DHODH	IFFO2	EEF1A1	RPS6KA4
U2AF2	LINC00520	DYNC1H1	CABIN1
SLC25A53	PTGER3	SPOP	POLR2B
SHOX2	AKAP8	DUSP1	CTTN
ZNF443	RAB3D	TYMP	SURF6
PPIEL	NUP88	PLOD2	SDC1
BRD4	TRIM69	XBP1	TMEM86A
STK11	H1-0	RPS19	STRN4
ANKRD13D	SHC2	SEC23B	GAPDH
DLGAP1-AS2	NPTX1	CPLANE2	CDK20
DDX11	EIF4EBP3	SRSF4	IFITM3
PTPRE	TAPT1	TP53	SLX1B
PTPRS	EBP	TOB2	CENPW
ADAMTS4	CHSY3	CDCP1	FOXP2
TANGO2	DUS4L-BCAP29	THAP4	TJP2
ATG9B	NOL6	DNAJA4	EDN1
TSHZ3	UBE2E2	RPS28	SMC1A
LYSMD2	AGBL3	SLC50A1	ARHGAP1
CDKN1B	CAPG	CWC27	BRI3BP
XIST	CBX7	EIF3K	NUDT16
PNPO	MAP3K2-DT	ADORA2A	GOLIM4
USP47	SNCA	ELOB	ZNF367
DNAJB11	IRAK3	THNSL1	FAAP100
GBP3	COMMD5	CNPY3	LPCAT2
NFKBIE	TCAIM	POU2F2	ZNF577
ATN1	TNFSF12	GAS5	FURIN
	FRMD8	SBNO1	TEX2
	MYBBP1A	SDF2L1	COA7
	NPLOC4	DDAH2	ZNF229
	RBMS1	NAA15	H4C15
	HSPA1A	NCAPG	ACAD9
	H2BC4	DAAM1	MECOM
	HSPA1B	ANGPTL4	ZNF304
	SF3B1	DCPS	OPN3
	PTK7	TBC1D10B	PIP5K1A
	SMARCD1	REEP3	ORAI2
	RIOX2	ARPC4	MMP16
	BNIP3L	FBL	COX18
	BDKRB1	RRAS	COBLL1
	SLC25A12	SLFN11	HDAC11
	PHF1	EIF3L	ARPIN
	MIR100HG	UBE4A	MAGEF1
	ARHGAP23	IFT172	SAP130
	TSPAN9	AK2	RCL1
	PLEKHM3	BCL3	LINC00968
	GAB1	STT3A	SLC5A3
	CACNB1	VIRMA	CDC25C
	ACVR2B	CRELD2	FAM220A
	SFPQ	PHLDA2	FUBP1
	MIDN	CYHR1	DDX28
	SLC39A7	ARID4A	AMD1
	LDHAP7	INF2	SVIL
	CCDC30	CREB3	CEMIP2
	BLCAP	ENO1	ELAC2
	ACE	POLR2L	IFT57
	LINC02693	TMEM109	MCM3
	PDE4C	FAN1	ALDOA
	EVA1A	ZC3H12C	NLRP1
	OAF	DRAP1	BNIP3L
	SLC52A2	SF3B2	AIMP2
	SNX4	CLTC	PPRC1
	LDHAP4	PPIB	MIR210HG
	STARD7	CRIPT	CDK19
	SGPP1	NKAP	ADAMTS7
	PYGB	MRPS27	ZNF326
	BID	SREK1IP1	TTYH3
	RSPO3	CALR	RMDN3
	MLLT3	JOSD2	ZNF264
	PAM	TOP2A	CDH6
	GAB2	NFATC3	TREM1
	IL1A	DCP1A	ILF3
	LETM1	ANTKMT	TRAIP
	SLC25A23	STK11	MAPK12
	KDM4B	MAML2	MBNL1
	INSYN2A	PKM	TPI1
	PRPF4B	TMEM115	C1orf21
	RAB32	RPL10A	BLOC1S3
	MXRA5	LSM11	C12orf49
	BAZ1A	EGLN2	TSPAN9
	ZNF780B	SYMPK	TMEM129
	LAMC1	VARS1	IFIH1
	KCNJ2	PGP	PCYT2
	MTIF3	SAC3D1	ZNF276
	DBI	SAMD1	CALHM5
	LINC00957	SERPINH1	RTN4IP1
	EIF4A2	SLC25A39	HNRNPR
	MBD2	CXCL3	IL36B
	PMPCA	PAQR7	SHISAL1
	GATA2	FBXO22	OIP5
	TAF13	GPRC5A	CD248
	NMT2	SLC9A1	SLC24A1
	MAMLD1	ANKRD36C	GINS1
	STATH	MYBL2	HMGXB3
	ISYNA1	ATG101	LPIN3
	SLC7A1	ARID4B	IFRD2
	SEPTIN5	PIGW	ZC3H7B
	ERF	GSPT1	PEX26
	SV2A	STYXL1	CDK5RAP2
	NAMPT	GREM1	ZNF329
	TIMM50	RTL5	LINC02043
	MANBA	PFDN5	TCAF2
	OGFOD1	CDK2AP2	ZNF365
	GAR1	MAGED1	MSTO1
	RBM3	TSR3	TRMT5
	GABBR2	MAP2	GPD1L
	KLF5	KRT7	BPGM
	FARSA	MKNK2	LACTB2
	ZNF316	BCL10	AHNAK2
	C3	NDUFA13	YTHDF1
	POU6F1	GOLGA4	HNRNPAB
	CHD1	VEGFA	MSH2
	ADGRG1	C15orf39	INTS7
	CXCL1	HP1BP3	MCM7
	GBP2	ORAI1	NCKAP5L
	PCDH9	TARS1	USP13
	VIM-AS1	SNRPD2	TBC1D16
	FBXW4	RRP12	SPDL1
	SPATA7	L2HGDH	TBX2
	RHOC	USP4	EVC
	CTDSPL2	IGF2BP3	TMEM138
	COPG1	ARPP19	TWNK
	DDX1	UQCRH	SNAPC4
	RASA4	CTR9	OTUD3
	CLEC2D	MYCBP	GPATCH11
	COMT	CACHD1	RAD54B
	BAK1	ECI1	PPP1R13B
	NUDT3	PPP1R21	KCTD11
	STIL	FKBP2	IL36RN
	LUZP2	SEPTIN11	VWA8
	CHCHD7	CA13	NFKBID
	CCNG2	ZNF691	WDR27
	ADAMTS12	ERG	CTBP1-DT
	RPS28	IGFBP5	EXOC7
	UTP18	PES1	WWTR1
	SRSF2	ABCB6	TSBP1-AS1
	ZFAS1	LARS1	LARS2
	KLHDC3	RB1CC1	C1QTNF5
	EHD1	AK1	SLC25A13
	MTA2	MAPK8IP3	KIAA0586
	OPTN	TYRO3	DKC1
	DDX39A	SNX6	METTL14
	NAMPTP1	SOX17	URB1
	TBXA2R	PPP3CA	TRIM69
	LRP11	RPAP2	LINC00504
	AKIRIN1	H2AC19	HERC3
	EREG	GFM1	NUFIP1
	CHMP7	PYCR1	MCAM
	U2AF2	TENT5C	LRRFIP1
	KMT2E	AGPAT1	SNORD3A
	RHBDF2	IL33	SENP1
	CCNG1	FTH1	FUT11
	EIF5A	TRNP1	NUAK2
	SLC25A42	MIR663AHG	SLC38A6
	DBP	JPT2	XYLT1
	DNAJB11	RPSA	STIMATE-MUSTN1
	EPHB1	TTC21B	ABHD11
	CRTC3	UBB	ZNF555
	IL13RA2	LRRC59	FAM53B
	TMEM233	PDZD2	PLAU
	AOX1	PRPF38A	RCHY1
	EGR1	PITPNM1	KDM6B
	RAB11B-AS1	ZNHIT1	KLHL17
	HBEGF	USO1	MCAT
	ITGA3	KIAA0040	INO80
	DTL	EEF1G	EXOC3-AS1
	NUP35	AKR7A2	ITPR1
	KPNA2	ZNF593	SHFL
	BECN1	PDCD11	DTX3L
	CPLANE1	HIBCH	PARD3B
	IFRD2	H2AC6	ARMC2
	H2BC20P	AP2S1	KCTD10
	RELB	ZNF622	TOP2A
	P3H1	SKIL	IPPK
	TRAPPC10	YIF1B	FRK
	DLG4	MRPL12	PCBD2
	SUPV3L1	ADD1	ENO1
	KDM4C	KCTD17	BIRC5
	SCN1B	GDAP2	FAF1
	TM7SF2	NPR1	PPM1F
	KLF7	MPRIP	NBPF10
	ABCF3	CLPB	FCF1
	ANKRD12	PCYT2	TNFAIP8L1
	MAP2	SMARCAL1	IL32
	CLUH	SLC1A5	POLQ
	ZNF581	RBMX2	TRERF1
	ENY2	JKAMP	ARMCX5
	LCORL	AGPAT5	GINS2
	TMEM132B	RPL41	ALG10B
	PCYOX1	AIP	GTSE1
	PNRC2	FSTL3	PARP1
	RNASEH1	ICAM3	VDR
	SOX12	TRIM59	SCFD2
	SGMS1	MFSD10	GPR1
	IFIT3	SRP68	MED20
	STMN3	SEPTIN5	SERGEF
	SEC63	ZNF581	RBSN
	PLEKHO1	PKD1	TCF21
	AHNAK2	CDC42EP4	CDK10
	TMEM104	NRDC	WIZ
	ITPR3	B3GNT7	DENND6B
	SPNS1	TBC1D30	HHIP-AS1
	CDC14B	CLTB	SP100
	SCARA3	LDHAP3	MXI1
	HSPA7	TMUB1	NARF
	NDNF	CENPB	MEIS1
	POLD4	OVCA2	AK4
	ABHD17B	DDIT4	ZNF236
	CA13	ARRDC3	PC
	SEMA7A	RPL36	DPP8
	MFSD14B	PTPN14
	MOXD1	PDLIM2
	NKX3-1	LTBP3
	PRELID1	CLIP2
	EPOR	FAM102B
	XPNPEP2	CHFR
	SLC22A23	SERF2
	ASPN	NDUFB5
	DPY19L3	TMEM141
	PNP	GLTP
	MKNK2	CFDP1
	ST6GAL1	TCF20
	MT2A	ZNHIT2
	DACT3	CDK11B
	HES1	NFATC4
	BMS1	KTN1
	PELI3	COL1A1
	GSTM2	DLGAP1-AS2
	MIR3648-1	LAMA5
	TACC2	DDB1
	HBB	PTRH1
	PARP14	PCDH12
	CYP27A1	SCO2
	PLCD1	PHF14
	NADK	FAM241A
	FAM136A	RPS9
	MECR	MTLN
	ERO1A	ATR
	ZNF525	NFKB2
	CLIP3	COPG1
	SH3RF1	TUBB4B
	TMEM161B-AS1	IFT46
	GABBR1	DNAJA1
	KCNAB2	LINC00863
	CLK1	RNF123
	PLIN2	EIF3B
	VAC14	RPL7A
	INPP5A	CLEC11A
	WDR31	PFKL
	EEF1AKMT4	MVD
	LRRC8A	RNASEH2C
	MACO1	ING1
	KRT18	DEPP1
	ZNF737	SMTN
	TSSC4	CISD1
	CRISPLD2	SAPCD2
	BTBD8	PDE4D
	SRSF8	PDE4DIP
	SYNGR3	RABAC1
	ALYREF	GTF3A
	OSER1-DT	PABPC4
	MTFP1	PRKDC
	UACA	GTF3C1
	ZNF821	IFITM3
	MAT2A	C1orf35
	PATJ	RPL23A
	DNAJC9	CCT7
	ERG28	NCAPH2
	BOP1	AMZ2
	MAX	PREB
	IL21R	ZNF121
	CACNG8	B4GALT2
	ZNF292	OLA1
	PRCC	UAP1
	MFSD2A	PFDN4
	TRIM26	HSPA6
	ADSS1	GRAMD1A
	SGCG	ATPAF1
	GRIN3B	HEXIM1
	EIF6	THY1
	ARHGAP18	RARS1
	MALINC1	EXOSC3
	MNT	COMMD9
	WWTR1	SLC25A1
	LENG9	NAA10
	TIMM23	SIL1
	MPC1	SUMF2
	RSPH3	CDC20
	SMIM29	COPS5
	SMN2	PTPRK
	FNIP2	UNK
	ANKRD10	COL6A3
	DDX21	BNIP2
	PPP1R13B	DNAJC7
	ARMH4	CAPZA1
	RPSAP52	RAC1
	ZNF285	DUSP5
	HCG11	STAT3
	ABCA3	RSBN1L
	TET3	NAT10
	C19orf54	CMSS1
	SAR1A	SERINC5
	LYRM1	AURKB
	GPX3	TIMM23B
	SAP30	HSP90B1
	TOP1	TJP1
	STBD1	ILRUN
	KIFC2	ZNF117
	DUSP14	NGRN
	CSF2	SFXN4
	OGFRL1	FIS1
	MBOAT2	WDR70
	PGM1	EIF5A
	EPC1	HDGF
	NCDN	UBL4A
	INTS7	KRT19
	PDCD11	COMMD2
	ATR	SLC20A2
	COX11	UQCC3
	PHF12	DDHD2
	ZNF420	COPS4
	DMKN	UBXN1
	EIF2B5	GADD45GIP1
	OPLAH	MPND
	DUS3L	RTCA
	CACNA1A	TLR6
	HEXIM1	MYLK
	NAGK	SHISA4
	SPON2	SNX29
	MOK	TNFAIP3
	MMP1	LONP1
	WASF2	ARHGEF2
	STRAP	KLF6
	RNF126	TRIR
	LTBP2	TNIP2
	DKK3	COX7A1
	KCNK1	NUBPL
	IFIH1	TMSB10
	RAB13	ITGB4
	R3HDM4	CSGALNACT2
	ABCC2	MCRIP1
	RBPMS	ATG3
	CD46	ZMYM6
	INKA2	SIX5
	TBCC	KDELR3
	ZBTB37	TMOD2
	SRA1	EIF3E
	WDR20	MRPL37
	KIF20B	PRKAR2A
	DDAH2	MRPS9
	XPO5	BAZ1B
	ADAMTS18	PKD1L1
	ADORA2A	LMAN2L
	FAM227B	NOB1
	DIS3L	ANKRD9
	LRPAP1	CANT1
	EPB41L1	ALKBH7
	ZNF740	RPL37A
	GRB14	NAA38
	PPIF	PDK1
	MTOR	NUDT19
	AIMP2	FADS3
	SLC16A14	EHMT2
	ROBO4	SHISA2
	CTPS1	MRPS25
	PLAAT3	MZT2B
	STAG3L5P-PVRIG2P-PILRB	SNHG30
	TNS3	SYTL4
	SLC35A2	UTP14A
	TENM3	MFSD3
	WDR46	HNRNPU
	POLE	OPTN
	TM2D2	PGLS
	CEP350	DDX27
	HIF1AN	ZNF672
	SRP19	GGCX
	PECR	PRDX5
	SLC7A11	IDS
	PMM2	PPP1CA
	CASKIN2	COL1A2
	CFAP298	FLNB
	PET100	PODXL
	EBNA1BP2	HYAL1
	TCEAL1	ZNF524
	ZNF471	ANP32A
	SLC20A1	PPIE
	MECP2	NNMT
	PRPF31	NPEPPSP1
	EME2	RHOD
	RECQL5	PPP1CC
	TMEM198B	STBD1
	PDXDC1	ZNF788P
	ANO3	VPS16
	DDIT4	CYLD
	ZNF396	SLC35G1
	LMNB2	C2CD4B
	GNPAT	NPDC1
	HEXIM2	TMEM54
	BST1	TBL1X
	KDM3A	PARP10
	FUBP3	PLIN3
	MARVELD1	EYA3
	STX2	MGLL
	DHX30	TRMT112
	FARSB	ATP5MG
	KRT19	PPP1R3C
	THEMIS2	PPP1R37
	MAK16	INTS3
	PTBP1	RERE
	COPS3	MPPE1
	ABHD11	BOD1
	GLS	PTPRF
	RRP15	GEMIN6
	ZMYND19	RCBTB2
	EMG1	UBFD1
		PTPRB
		BTF3
		REL
		TM2D2
		SON
		ZCCHC7
		DYNLL1
		AQP3
		BHLHE40
		ADCK2
		FAF1
		MRPL17
		IFI6
		IFI27L2
		PRELID3B
		FOXK1
		RNF208
		IMPDH1
		HEMK1
		SCAP
		PTCD2
		ZSWIM6
		TSC22D2
		DDX20
		SNX18
		IKBIP
		IDE
		TTC9C
		PRDX6
		CIRBP
		PPP1R12A
		CHID1
		EIF4A1
		TSC22D3
		SSR3
		STK16
		JPT1
		HADHA
		SFT2D3
		EIF3I
		IARS1
		C4orf48
		RGS3
		MEX3D
		ARHGAP45
		EIF3G
		ILK
		ADAMTS4
		SPATS2
		RPL24
		ZNRD1
		IGBP1
		DHPS
		COPS6
		TCIRG1
		NUP50
		SKA2
		TMEM30A
		LIFR-AS1
		RPL26
		RPL18
		MRPL44
		PRICKLE2
		NT5C2
		ID1
		EVI5
		LIN7C
		SLC30A5
		H1-0
		SLC12A4
		KCNC4
		SYNPO
		PDCD7
		MAEA
		TOB1
		GBP4
		GNL1
		CD82
		CEP55
		AEBP2
		CLTA
		ACY1
		DDRGK1
		PLPBP
		ARHGAP1
		ARFRP1
		TSPYL4
		CUTA
		VAMP5
		TAF13
		FSCN1
		RFXAP
		ACTA2
		SENP5
		OAZ1
		MRM1
		IMMT
		GPBP1
		TMEFF1
		HTATIP2
		GLE1
		SERBP1
		FAM149B1
		BCAT2
		ACADVL
		SLC43A3
		TMEM250
		CRK
		EPG5
		FEM1A
		IKBKE
		NPM3
		TAF10
		KBTBD6
		NPM1
		CCNA2
		SDSL
		POLR2K
		FAM50A
		AGBL3
		LAMB3
		TPT1
		RUFY1
		ATXN10
		TRADD
		SIAH2
		MRPL1
		MRPL23
		LSM4
		MEGF9
		VEGFB
		MLXIP
		BRAT1
		RFX3
		TACO1
		EIF2S3
		PRPF8
		PACRGL
		KDM6A
		FBXL5
		SHMT2
		FAM168B
		GID4
		ARHGEF37
		MON1A
		RPL23AP42
		TRIM28
		ZNF358
		PMVK
		DNAJC16
		GSN
		KANK1
		PDHX
		MRPL51
		SLC16A1
		CCNK
		CCDC102A
		KRAS
		SLC25A46
		USP54
		FAM76B
		THAP7-AS1
		RPL35
		SESN2
		TSC2
		TRABD
		TXNL1
		LYAR
		WDR54
		FAM13B
		SMC3
		NCOA4
		STK25
		UFC1
		ABCF1
		NDUFA11
		TBC1D7
		TP53I13
		SRGAP1
		ZNF862
		GJA4
		SYNGR2
		MYDGF
		MCRIP2
		RP9P
		SAP18
		NSMCE1
		UBASH3B
		C8orf82
		HCFC1R1
		SNX3
		PRMT5
		RPL28
		CLSPN
		FAM120A
		SNF8
		RPS5
		MRPS24
		MRFAP1
		CIB1
		MRPL54
		SPATA5L1
		RBBP5
		ECH1
		WARS1
		PLEKHA1
		TFPT
		P4HA2
		EEF1A1P13
		AP2A2
		RAB10
		PXK
		KPNB1
		PLEKHA2
		NSDHL
		RPS10-NUDT3
		THADA
		KMT2E
		FCHSD2
		CXCL2
		PNMA1
		DNAJC3
		ARID2
		MRPS30
		DOHH
		LONP2
		GSS
		MLLT6
		HPRT1
		MIR31HG
		SCAND1
		FGD4
		GCDH
		CCND3
		FBXL20
		TCP1
		SRSF5
		DNAJB2
		CHCHD10
		NUDC
		PCSK1
		RNF167
		LIX1L
		SLC4A2
		RASSF4
		NAPRT
		RPS16
		ZKSCAN8
		YIF1A
		EMC9
		INTS11
		SMC4
		CKS1B
		NFKBIA
		MLKL
		CNN3
		GTPBP2
		CMC4
		ZC3HAV1
		STK38L
		HSDL2
		ATG2A
		ITPKC
		CLCN3
		ATG14
		PEF1
		EGLN3
		APOE
		NFKB1
		DGAT1
		UBR2
		SOD1
		PQBP1
		PPAN
		CCT2
		DNAJA2
		STOML2
		MRPL52
		SOCS5
		QSOX1
		IL6
		NMT2
		ZKSCAN5
		GUCD1
		CCDC50
		NDUFB11
		SDHA
		MTR
		NOS3
		ANAPC7
		SUB1
		UBA52
		DARS1
		DNAJC4
		TTLL12
		USP39
		RPLP0
		TALDO1
		EIF3H
		TCEA3
		HOXB2
		NACA
		SEC61A1
		ADGRA3
		ATP1A1
		BTG2
		RGS4
		NOC2L
		SLC5A3
		CHCHD3
		TFRC
		SLC39A14
		ARPC1B
		GAMT
		SMC5
		SNAP29
		CEP112
		CLPP
		HHLA3
		TIMM17B
		PDXK
		STC1
		RBM18
		FAM110A
		PRKD2
		SWAP70
		BUD31
		YBX1
		SDHB
		MMP25-AS1
		ATP8B2
		FTSJ1
		SHC1
		ELMO2
		SPATS2L
		ALYREF
		NENF
		NUP37
		BCL6
		BAMBI
		ZNF420
		DIP2C
		PITHD1
		SOD2
		SLC38A2
		TMEM214
		SLC2A1
		GPD1L
		LAMTOR4
		G0S2
		ARSJ
		NFU1
		RPL31
		NUDT21
		TSC22D4
		PASK
		SELENOK
		TNFSF12
		SLC9A3
		GPNMB
		XRCC5
		GCC1
		DTX3L
		ZCRB1
		MRPL41
		BORCS8-MEF2B
		BAIAP2
		SUDS3
		SS18
		MUTYH
		CAPRIN1
		RDH11
		PIGC
		MAP4K2
		MCTS1
		NGLY1
		VWFP1
		CABIN1
		RPL7
		ZBTB20
		SNIP1
		TMEM167B
		TADA3
		CHD2
		NDUFS8
		NUP214
		EPC2
		CISD3
		GOLGA8A
		ZNF280C
		C1QBP
		TMC6
		PHACTR2
		ZNF213-AS1
		NADK
		QTRT1
		ZNF702P
		CCDC3
		CIT
		ILF2
		TEP1
		RPS7
		ANKRD46
		POLR3GL
		GOLGA3
		PMF1-BGLAP
		EIF4EBP1
		SOCS3
		EFEMP2
		IPO11
		PPID
		RALB
		CDKN2A
		PLXND1
		G2E3
		DBNDD2
		BEX3
		FARSA
		MED18
		MOAP1
		WIPF2
		PTGIS
		RAD54L2
		ZNF19
		GRWD1
		TRIP12
		EPN1
		USP16
		DR1
		SRF
		RASA4DP
		RASSF2
		CHKA
		TM4SF18
		FICD
		HTATSF1
		PDIA4
		IFITM2
		MESD
		NDUFAF8
		PSMB5
		LMAN2
		COMMD6
		METRN
		PTOV1
		LRP11
		ARL10
		PAFAH2
		C3orf18
		RNF40
		AMPD2
		THBD
		PAF1
		BEX4
		WDR37
		DNAH1
		MRPL48
		SHPRH
		CYFIP2
		RPLP2
		ZDHHC17
		SNRNP40
		CARNMT1
		TMC7
		CDC42EP2
		MMP17
		AHSA1
		DGCR6L
		TBC1D10A
		HNRNPDL
		CDR2L
		ARC
		PRELID1
		RPS21
		CRNKL1
		CCNB1
		CDIPT
		DDX18
		MYH9
		TRMT1
		SRSF9
		TMF1
		UBE4B
		SNRPN
		HAUS4
		DHFR2
		SF3B5
		RARG
		MALL
		KIF11
		DYNC1I2
		RAB11FIP1
		HCN2
		SLC35A5
		AHCYL1
		RNF20
		REX1BD
		KANK3
		TRIP13
		DMAC2L
		TRAF1
		RNF213
		F2RL2
		DDX21
		LRP1
		DDX41
		UGDH
		ARMC10
		RPL37
		SEC22B
		RSRC1
		TEDC1
		EHD2
		MYO1D
		IER3IP1
		ZKSCAN1
		GUK1
		RPS8
		NDUFB7
		SUPT16H
		TMEM219
		GDAP1
		CLIC1
		NELFB
		INTS8
		NDUFS3
		RFX1
		PSMD1
		ERMP1
		METTL18
		ATP5MD
		GNPAT
		WDR77
		HECTD3
		CCDC107
		COL3A1
		CTBP1-DT
		NXN
		CIAO2B
		RBM38
		DPY19L4
		AGPAT2
		PHETA2
		ACTB
		WBP4
		PPP4C
		KCTD9
		FAM50B
		CDV3
		KDELR2
		PPARA
		NRARP
		UBTF
		UBE3A
		CWC25
		KIF5B
		HAGHL
		UBE2M
		WDR18
		SNCG
		ACOT11
		RPL32
		FBXL15
		CDCA8
		SART1
		TYMS
		PWWP2B
		ACOT7
		ODF2
		AJM1
		THG1L
		GPX4
		SGTA
		DKK1
		ZNF561
		UXT
		GEM
		TOMM70
		RHOC
		ANO6
		DKC1
		COQ5
		PPM1L
		RLF
		WDR55
		EIF2B3
		KLHDC2
		RCC1L
		AHI1
		GMPPB
		SURF2
		TIMM50
		POLR3E
		LINC01013
		MRPS15
		EDF1
		MOCOS
		PCNX2
		KLF7
		CLDN10
		BNIP1
		ATRIP
		ACO1
		MPC2
		ROCK1
		NCL
		ZNF398
		NTHL1
		ITGB1BP1
		PPP6R3
		CALHM2
		WDR24
		PSMD4
		POLR1E
		TSPY26P
		MT1F
		C1orf112
		ID3
		BTBD19
		DHX32
		RPS10
		NUP62
		NFKBIZ
		GTF3C5
		COX7A2L
		KIF3B
		ARHGEF11
		ATP5PB
		IGFBP4
		POLE4
		POLDIP3
		BOK
		GIPC3
		RPL19
		EIF4A3
		BPGM
		ST13
		NFYB
		CERT1
		LAMTOR2
		ATP5F1D
		MED9
		DXO
		MRPS18A
		DFFA
		KCTD20
		TMSB15B
		ZFP1
		FSBP
		PYROXD1
		ETFB
		OPLAH
		CFAP410
		DHRS4
		TPCN2
		CCDC88A
		YARS2
		ATXN2L
		SAR1B
		UQCRC1
		HEY1
		SRP72
		KRT8
		C9orf40
		WDR4
		SFRP1
		TWF2
		DOK1
		NUDCD3
		ALDH18A1
		COX5B
		HDGFL2
		C16orf58
		CASC15
		ATP5MC2
		MRPL9
		TRMT2A
		RAB8A
		TXNDC17
		CDT1
		MIF
		TAF5
		THTPA
		C15orf54
		ANKRD28
		CTDSP1
		C19orf33
		DDIT3
		RMND1
		NSMF
		RPL34
		OMA1
		WWP1
		WHAMMP2
		ZBTB47
		NDUFB1
		FAAP20
		MN1
		PNRC1
		RPL5
		ZNF185
		STAT5A
		DRAM2
		HIF1AN
		SLC20A1
		MAP4
		ICOSLG
		IMP3
		DYNC2H1
		BROX
		HOXB3
		SSR4
		EBPL
		STARD10
		DPP7
		TMEM88
		ZMYM4
		TM7SF3
		SDE2
		FDX2
		MDH2
		RPS27A
		CCNQ
		SEMA6A
		MFSD12
		WDR7
		TSSC4
		SLC18B1
		CHAMP1
		ESYT1
		PDCL
		CDK6
		TMEM154
		ITPRIPL2
		ZNF668
		NUDT4B
		ZMAT2
		RPL36A
		ARFGAP3
		TMEM147-AS1
		NAV3
		MAD1L1
		PGAP6
		ZNF787
		COA6
		DDX11
		XPO4
		ZSWIM3
		ARMCX2
		GEMIN8
		CTSF
		CCDC86
		RER1
		NAA80
		RBCK1
		CUL7
		CALCOCO2
		NOL3
		IER5
		MAP7D1
		RASAL2
		FKBPL
		CASP10
		TOP3A
		RACK1
		RPL6
		ELK4
		SSR1
		NUDT5
		CRACD
		TUBGCP2
		SNX33
		STMP1
		SLC4A8
		RMND5B
		TTLL4
		CUX1
		PPP1R35
		CTSO
		RAPGEF1
		TXNL4A
		PDK4
		RWDD2A
		MAP2K5
		NAE1
		NMNAT1
		SCRN3
		ZNF512
		LYRM7
		CHMP4A
		ADAM15
		MMS22L
		FBXL19-AS1
		SERTAD2
		EEF1B2
		DAGLB
		CCDC34
		ZCCHC3
		CREBRF
		HDDC3
		RPL18A
		COPB2
		MPI
		CYFIP1
		BCKDHB
		DCTN1
		GTSE1
		ENAH
		RNF181
		TTC7B
		CX3CL1
		MKNK1
		WASHC4
		LTBP4
		RPP25
		SLC46A3
		ZNF778
		SLC25A5
		CNTRL
		PCK2
		BTF3L4P2
		SBDS
		UGP2
		HSPB8
		CANX
		FAM114A1
		ZFYVE19
		ME2
		SLC25A37
		FECH
		MTFP1
		ACOT8
		THOC1
		FAM8A1
		PDHA1
		POLI
		CCM2
		ZNF410
		EIF3A
		PNKP
		SRRM1
		C19orf53
		JTB
		ALG1
		BMPER
		FIGN
		HAX1
		PTDSS1
		PDLIM7
		MTRF1L
		ADM
		FKBP8
		KITLG
		NSA2
		C1R
		PPP4R3B
		GYG1
		AKAP13
		SEPSECS-AS1
		SNTB2
		NFATC1
		CLPTM1L
		KARS1
		NME2
		H2BC21
		CC2D2A
		SGMS1
		ZBTB8A
		C7orf26
		KIAA0100
		POLR1B
		HAUS7
		DSE
		ARL2
		SUPV3L1
		PRCC
		PCCA
		MRPL53
		NCOR1
		VAMP2
		SEC16A
		JUNB
		MRPS22
		GPR137
		FAM220A
		GPS1
		SURF1
		NAIP
		MRPL24
		GABPB1-IT1
		BOLA2B
		SP2
		GPX1P1
		DUSP12
		PHACTR1
		MANBA
		DDR1
		MAP3K20
		CMKLR1
		MRPS2
		DNASE1L1
		TP53INP1
		DIAPH3
		SMG1
		ZC3H6
		LPP-AS2
		ETV6
		RAPGEF4
		PIH1D1
		POLD4
		FAU
		ARPC1A
		PPP2R1A
		TFE3
		FAM83D
		RPS17
		CCN2
		FZD6
		ZNF829
		SARS1
		TLE2
		RPS12
		ANKRD27
		PRPF19
		OPRL1
		PTTG1
		ATP5PD
		EEF1AKMT4
		ARHGDIB
		NDUFV3
		LETMD1
		MOV10L1
		MYO5A
		MTHFD1
		CXXC5
		NUDT16L1
		ADPRH
		HEG1
		ADCY4
		MYO1C
		NDUFC1
		RAC3
		LSM2
		RHOBTB3
		SH3BP4
		CASP12
		DDX5
		TBCA
		ARSL
		MRPS34
		FNTB
		SF3B6
		NAV2
		TUBA4A
		FBXW5
		YLPM1
		RHPN1
		WASHC5
		LMF2
		MYO18A
		DEPDC5
		ZNF771
		EMP3
		RGPD5
		PAICS
		ITGAV
		DOP1A
		GNB1L
		LUC7L
		CDK1
		ANKRD13B
		MIIP
		FGFR1OP2
		TRIM38
		ATOX1
		APOBEC3D
		LPP
		CUBN
		RPL39
		INPP5D
		CHMP1A
		PSMC1P1
		CNN2
		RPS24
		ANK1
		COG8
		ZBED8
		BIRC5
		TMEM165
		NEXN
		CAPZB
		NPIPA1
		DHH
		BCCIP
		BTN2A2
		TPP2
		TRAPPC8
		TMEM117
		SKA3
		MYL6
		KALRN
