# Supplementary material for: An organ-on-chip model of pulmonary arterial hypertension identifies a BMPR2-SOX17-prostacyclin signalling axis
Source: Commun Biol. 2022 Nov 7;5:1192. doi: 10.1038/s42003-022-04169-z (PMC9640600; doi:10.1038/s42003-022-04169-z)
Supplement: Supplementary file 6 — Supplementary Data 3 [file 42003_2022_4169_MOESM6_ESM.xlsx]

## Sheet: HALLMARK
NAME	GS<br> follow link to MSigDB	GS DETAILS	SIZE	ES	NES	NOM p-val	FDR q-val	FWER p-val	RANK AT MAX	LEADING EDGE
HALLMARK_G2M_CHECKPOINT	HALLMARK_G2M_CHECKPOINT	Details ...	6	0.592827	1.77223	0.0177866	0.0788912	0.04	61	tags=83%, list=25%, signal=109%
HALLMARK_COMPLEMENT	HALLMARK_COMPLEMENT	Details ...	6	0.295359	0.886427	0.585938	1	0.747	10	tags=33%, list=4%, signal=34%
HALLMARK_HYPOXIA	HALLMARK_HYPOXIA	Details ...	5	0.315126	0.859762	0.627615	0.831083	0.771	167	tags=100%, list=69%, signal=313%
HALLMARK_TNFA_SIGNALING_VIA_NFKB	HALLMARK_TNFA_SIGNALING_VIA_NFKB	Details ...	6	0.202532	0.602577	0.92549	0.935412	0.919	113	tags=67%, list=47%, signal=122%

## Sheet: KEGG
NAME	GS<br> follow link to MSigDB	GS DETAILS	SIZE	ES	NES	NOM p-val	FDR q-val	FWER p-val	RANK AT MAX	LEADING EDGE
KEGG_NEUROTROPHIN_SIGNALING_PATHWAY	KEGG_NEUROTROPHIN_SIGNALING_PATHWAY	Details ...	5	-0.436975	-1.22083	0.216963	0.218935	0.11	140	tags=100%, list=58%, signal=231%

## Sheet: Reactome
NAME	GS<br> follow link to MSigDB	GS DETAILS	SIZE	ES	NES	NOM p-val	FDR q-val	FWER p-val	RANK AT MAX	LEADING EDGE
REACTOME_DNA_REPAIR	REACTOME_DNA_REPAIR	Details ...	5	0.655462	1.81777	0.00793651	0.286719	0.207	86	tags=100%, list=35%, signal=152%
REACTOME_MRNA_SPLICING	REACTOME_MRNA_SPLICING	Details ...	5	0.62605	1.72772	0.0160966	0.155523	0.317	93	tags=100%, list=38%, signal=159%
REACTOME_RNA_POLYMERASE_II_TRANSCRIPTION_TERMINATION	REACTOME_RNA_POLYMERASE_II_TRANSCRIPTION_TERMINATION	Details ...	5	0.62605	1.73316	0.0211538	0.222937	0.307	93	tags=100%, list=38%, signal=159%
REACTOME_PROCESSING_OF_CAPPED_INTRON_CONTAINING_PRE_MRNA	REACTOME_PROCESSING_OF_CAPPED_INTRON_CONTAINING_PRE_MRNA	Details ...	10	0.430901	1.63762	0.0257426	0.188171	0.455	93	tags=80%, list=38%, signal=124%
REACTOME_DEVELOPMENTAL_BIOLOGY	REACTOME_DEVELOPMENTAL_BIOLOGY	Details ...	6	-0.489451	-1.46243	0.102362	1	0.776	47	tags=67%, list=19%, signal=81%
REACTOME_VESICLE_MEDIATED_TRANSPORT	REACTOME_VESICLE_MEDIATED_TRANSPORT	Details ...	5	-0.493277	-1.38944	0.108317	0.746003	0.878	78	tags=80%, list=32%, signal=115%
REACTOME_TRANSPORT_OF_MATURE_TRANSCRIPT_TO_CYTOPLASM	REACTOME_TRANSPORT_OF_MATURE_TRANSCRIPT_TO_CYTOPLASM	Details ...	5	0.511765	1.40874	0.119342	0.447704	0.856	23	tags=60%, list=9%, signal=65%
REACTOME_POST_TRANSLATIONAL_PROTEIN_MODIFICATION	REACTOME_POST_TRANSLATIONAL_PROTEIN_MODIFICATION	Details ...	16	0.294328	1.36489	0.126252	0.385472	0.91	160	tags=94%, list=66%, signal=256%
REACTOME_CELL_CYCLE	REACTOME_CELL_CYCLE	Details ...	7	0.431598	1.39362	0.129741	0.400427	0.876	36	tags=57%, list=15%, signal=65%
REACTOME_CELL_CYCLE_MITOTIC	REACTOME_CELL_CYCLE_MITOTIC	Details ...	5	0.494958	1.32983	0.135524	0.382681	0.931	27	tags=60%, list=11%, signal=66%
REACTOME_NEURONAL_SYSTEM	REACTOME_NEURONAL_SYSTEM	Details ...	6	-0.43038	-1.2867	0.183099	0.741695	0.958	61	tags=67%, list=25%, signal=87%
REACTOME_RNA_POLYMERASE_II_TRANSCRIPTION	REACTOME_RNA_POLYMERASE_II_TRANSCRIPTION	Details ...	29	0.207702	1.24415	0.185771	0.419427	0.976	97	tags=59%, list=40%, signal=86%
REACTOME_SUMOYLATION	REACTOME_SUMOYLATION	Details ...	5	0.451261	1.24968	0.212724	0.456628	0.976	86	tags=80%, list=35%, signal=121%
REACTOME_CELLULAR_RESPONSES_TO_EXTERNAL_STIMULI	REACTOME_CELLULAR_RESPONSES_TO_EXTERNAL_STIMULI	Details ...	13	-0.273244	-1.16915	0.279612	0.845063	0.994	69	tags=54%, list=28%, signal=71%
REACTOME_HEMOSTASIS	REACTOME_HEMOSTASIS	Details ...	5	-0.415126	-1.12529	0.305499	0.780675	0.996	48	tags=60%, list=20%, signal=73%
REACTOME_METABOLISM_OF_RNA	REACTOME_METABOLISM_OF_RNA	Details ...	13	0.241472	1.05001	0.382812	0.730877	1	93	tags=62%, list=38%, signal=94%
REACTOME_ADAPTIVE_IMMUNE_SYSTEM	REACTOME_ADAPTIVE_IMMUNE_SYSTEM	Details ...	10	0.256223	0.958441	0.479452	0.739556	1	158	tags=90%, list=65%, signal=247%
REACTOME_CLASS_I_MHC_MEDIATED_ANTIGEN_PROCESSING_PRESENTATION	REACTOME_CLASS_I_MHC_MEDIATED_ANTIGEN_PROCESSING_PRESENTATION	Details ...	5	0.352941	0.961168	0.481262	0.79135	1	158	tags=100%, list=65%, signal=280%
REACTOME_INNATE_IMMUNE_SYSTEM	REACTOME_INNATE_IMMUNE_SYSTEM	Details ...	11	0.238245	0.961583	0.492784	0.855812	1	10	tags=27%, list=4%, signal=27%
REACTOME_SIGNALING_BY_RECEPTOR_TYROSINE_KINASES	REACTOME_SIGNALING_BY_RECEPTOR_TYROSINE_KINASES	Details ...	8	-0.249468	-0.865596	0.6	1	1	155	tags=88%, list=64%, signal=234%
REACTOME_EXTRACELLULAR_MATRIX_ORGANIZATION	REACTOME_EXTRACELLULAR_MATRIX_ORGANIZATION	Details ...	5	0.315126	0.878478	0.621622	0.839816	1	167	tags=100%, list=69%, signal=313%
REACTOME_METABOLISM_OF_STEROIDS	REACTOME_METABOLISM_OF_STEROIDS	Details ...	5	0.302521	0.838581	0.642105	0.862516	1	170	tags=100%, list=70%, signal=326%
REACTOME_INTRACELLULAR_SIGNALING_BY_SECOND_MESSENGERS	REACTOME_INTRACELLULAR_SIGNALING_BY_SECOND_MESSENGERS	Details ...	6	-0.272152	-0.801336	0.721757	1	1	139	tags=83%, list=57%, signal=190%
REACTOME_DISEASES_OF_SIGNAL_TRANSDUCTION_BY_GROWTH_FACTOR_RECEPTORS_AND_SECOND_MESSENGERS	REACTOME_DISEASES_OF_SIGNAL_TRANSDUCTION_BY_GROWTH_FACTOR_RECEPTORS_AND_SECOND_MESSENGERS	Details ...	6	-0.259494	-0.784609	0.744	1	1	61	tags=50%, list=25%, signal=65%
REACTOME_INFECTIOUS_DISEASE	REACTOME_INFECTIOUS_DISEASE	Details ...	6	-0.263713	-0.776848	0.752918	1	1	60	tags=50%, list=25%, signal=65%
REACTOME_RHO_GTPASE_EFFECTORS	REACTOME_RHO_GTPASE_EFFECTORS	Details ...	5	-0.24958	-0.693761	0.819106	1	1	136	tags=80%, list=56%, signal=178%
REACTOME_TRANSPORT_OF_SMALL_MOLECULES	REACTOME_TRANSPORT_OF_SMALL_MOLECULES	Details ...	10	0.188841	0.704395	0.839827	1	1	198	tags=100%, list=81%, signal=518%
REACTOME_CYTOKINE_SIGNALING_IN_IMMUNE_SYSTEM	REACTOME_CYTOKINE_SIGNALING_IN_IMMUNE_SYSTEM	Details ...	10	0.180258	0.681765	0.887967	1	1	200	tags=100%, list=82%, signal=542%
REACTOME_METABOLISM_OF_LIPIDS	REACTOME_METABOLISM_OF_LIPIDS	Details ...	8	-0.178191	-0.614516	0.915464	1	1	111	tags=63%, list=46%, signal=111%
REACTOME_METABOLISM_OF_AMINO_ACIDS_AND_DERIVATIVES	REACTOME_METABOLISM_OF_AMINO_ACIDS_AND_DERIVATIVES	Details ...	5	-0.226891	-0.613969	0.934156	1	1	190	tags=100%, list=78%, signal=449%
REACTOME_INTERFERON_SIGNALING	REACTOME_INTERFERON_SIGNALING	Details ...	6	0.198312	0.587745	0.935114	1	1	33	tags=33%, list=14%, signal=38%
REACTOME_RHO_GTPASE_CYCLE	REACTOME_RHO_GTPASE_CYCLE	Details ...	8	0.17234	0.582414	0.957198	0.994169	1	80	tags=50%, list=33%, signal=72%
REACTOME_NEUTROPHIL_DEGRANULATION	REACTOME_NEUTROPHIL_DEGRANULATION	Details ...	6	-0.175105	-0.523232	0.98008	0.978033	1	162	tags=83%, list=67%, signal=244%
REACTOME_SIGNALING_BY_RHO_GTPASES_MIRO_GTPASES_AND_RHOBTB3	REACTOME_SIGNALING_BY_RHO_GTPASES_MIRO_GTPASES_AND_RHOBTB3		12	0.112554	0.465736	0.998062	0.993223	1	135	tags=67%, list=56%, signal=143%
