# Supplementary material for: An organ-on-chip model of pulmonary arterial hypertension identifies a BMPR2-SOX17-prostacyclin signalling axis
Source: Commun Biol. 2022 Nov 7;5:1192. doi: 10.1038/s42003-022-04169-z (PMC9640600; doi:10.1038/s42003-022-04169-z)
Supplement: Supplementary file 7 — Supplementary Data 4 [file 42003_2022_4169_MOESM7_ESM.xlsx]

## Sheet: EC - BMPR2 knockdown in Normox.
SYMBOL	ENTREZID	GENENAME	logFC	PValue
BMPR2	659	bone morphogenetic protein receptor type 2	-3.1445	1.69958e-12
SMAD6	4091	SMAD family member 6	-2.56184	2.2591e-10
LIPG	9388	lipase G, endothelial type	-1.58219	1.76488e-09
ITGAV	3685	integrin subunit alpha V	-0.959627	1.94293e-08
TCIM	56892	transcriptional and immune response regulator	-1.96776	3.14315e-08
IL13RA1	3597	interleukin 13 receptor subunit alpha 1	-1.16447	3.76034e-08
TMED2	10959	transmembrane p24 trafficking protein 2	-0.952919	1.36096e-07
PODXL	5420	podocalyxin like	-1.30987	1.90323e-07
GJA5	2702	gap junction protein alpha 5	-3.65684	2.98938e-07
ADGRL4	64123	adhesion G protein-coupled receptor L4	-1.0362	3.06075e-07
TGFBR2	7048	transforming growth factor beta receptor 2	-1.21565	3.34469e-07
CRIM1	51232	cysteine rich transmembrane BMP regulator 1	-0.999006	3.7595e-07
KDR	3791	kinase insert domain receptor	-1.90963	5.74257e-07
RHOBTB3	22836	Rho related BTB domain containing 3	-1.27164	7.85237e-07
TLR4	7099	toll like receptor 4	-1.79875	1.07739e-06
OSGIN1	29948	oxidative stress induced growth inhibitor 1	-1.31745	1.123e-06
GASK1B	51313	golgi associated kinase 1B	-1.61537	1.18009e-06
SLC7A11	23657	solute carrier family 7 member 11	-0.85723	1.22341e-06
TMEM30A	55754	transmembrane protein 30A	-0.770545	1.2373e-06
CYP1B1	1545	cytochrome P450 family 1 subfamily B member 1	-1.84214	1.58041e-06
KCTD12	115207	potassium channel tetramerization domain containing 12	-1.2301	1.86399e-06
IRF6	3664	interferon regulatory factor 6	-1.90232	2.29979e-06
TRNP1	388610	TMF1 regulated nuclear protein 1	-1.26679	2.34093e-06
ARHGAP24	83478	Rho GTPase activating protein 24	-1.54554	2.81448e-06
C15orf54	400360	chromosome 15 open reading frame 54 (putative)	-3.80496	2.81782e-06
GOLGA2	2801	golgin A2	-1.10482	3.3114e-06
GPR180	160897	G protein-coupled receptor 180	-1.01259	3.77327e-06
PPIP5K2	23262	diphosphoinositol pentakisphosphate kinase 2	-1.45523	3.87564e-06
ENG	2022	endoglin	-1.04777	3.93966e-06
TEK	7010	TEK receptor tyrosine kinase	-1.45778	4.05816e-06
SLC26A2	1836	solute carrier family 26 member 2	-1.4694	4.98874e-06
NRCAM	4897	neuronal cell adhesion molecule	-1.23729	5.17581e-06
RSAD2	91543	radical S-adenosyl methionine domain containing 2	1.77284	5.44012e-06
GNG12	55970	G protein subunit gamma 12	-0.897257	5.79666e-06
CALD1	800	caldesmon 1	-0.838086	6.8249e-06
MAP7D1	55700	MAP7 domain containing 1	-0.723394	6.95779e-06
SRXN1	140809	sulfiredoxin 1	-0.835298	7.3758e-06
FAM214B	80256	family with sequence similarity 214 member B	-1.28994	7.60114e-06
MACF1	23499	microtubule actin crosslinking factor 1	-0.726624	7.87029e-06
ADAMTS9	56999	ADAM metallopeptidase with thrombospondin type 1 motif 9	-1.21882	8.15486e-06
L3MBTL3	84456	L3MBTL histone methyl-lysine binding protein 3	-1.16827	8.4619e-06
AGO1	26523	argonaute RISC component 1	-1.30532	1.25587e-05
PHLDB1	23187	pleckstrin homology like domain family B member 1	-0.859389	1.36742e-05
NORAD	647979	non-coding RNA activated by DNA damage	-0.886719	1.47396e-05
CDH5	1003	cadherin 5	-0.932885	1.55648e-05
ITGA2	3673	integrin subunit alpha 2	-1.09258	1.62955e-05
CHPF2	54480	chondroitin polymerizing factor 2	-1.11694	1.66084e-05
RPS6KA2	6196	ribosomal protein S6 kinase A2	-1.06821	1.6752e-05
TTLL12	23170	tubulin tyrosine ligase like 12	-0.769662	1.77538e-05
HHIP	64399	hedgehog interacting protein	-1.51917	1.80285e-05
CLCN3	1182	chloride voltage-gated channel 3	-1.0983	1.80647e-05
HYAL2	8692	hyaluronidase 2	-1.02384	1.83015e-05
TNFAIP8L3	388121	TNF alpha induced protein 8 like 3	-0.804181	1.83955e-05
TTYH3	80727	tweety family member 3	-0.664881	1.91268e-05
ADGRL2	23266	adhesion G protein-coupled receptor L2	-0.853021	2.23013e-05
PRSS23	11098	serine protease 23	-0.944496	2.50266e-05
RBMS1	5937	RNA binding motif single stranded interacting protein 1	-0.739247	2.5638e-05
MYBL2	4605	MYB proto-oncogene like 2	0.593575	2.74708e-05
ZMPSTE24	10269	zinc metallopeptidase STE24	-1.1506	2.97095e-05
MARCHF4	57574	membrane associated ring-CH-type finger 4	-1.74445	2.98402e-05
FSTL1	11167	follistatin like 1	-0.76383	3.02145e-05
CLEC14A	161198	C-type lectin domain containing 14A	-1.6757	3.15141e-05
PKIG	11142	cAMP-dependent protein kinase inhibitor gamma	-0.869695	3.43246e-05
ERG28	11161	ergosterol biosynthesis 28 homolog	-1.09085	3.53082e-05
LOX	4015	lysyl oxidase	-1.37469	3.6015e-05
ID1	3397	inhibitor of DNA binding 1, HLH protein	-1.07739	3.69846e-05
SWAP70	23075	switching B cell complex subunit SWAP70	-0.720207	3.93866e-05
SLC39A13	91252	solute carrier family 39 member 13	-0.892963	4.03497e-05
GNG11	2791	G protein subunit gamma 11	-1.32651	4.13527e-05
CCPG1	9236	cell cycle progression 1	-0.799071	4.29977e-05
CKAP4	10970	cytoskeleton associated protein 4	-0.833142	4.38958e-05
PLOD2	5352	procollagen-lysine,2-oxoglutarate 5-dioxygenase 2	-0.923224	4.43133e-05
PICALM	8301	phosphatidylinositol binding clathrin assembly protein	-0.577866	4.52241e-05
SH2D3C	10044	SH2 domain containing 3C	-1.3817	4.57609e-05
TMEM14C	51522	transmembrane protein 14C	-1.00644	4.59854e-05
ARPC5	10092	actin related protein 2/3 complex subunit 5	-0.935765	4.74143e-05
CALU	813	calumenin	-0.530642	4.74807e-05
ROBO4	54538	roundabout guidance receptor 4	-0.994507	4.80402e-05
KHNYN	23351	KH and NYN domain containing	-1.09038	4.83725e-05
IDH1	3417	isocitrate dehydrogenase (NADP(+)) 1	-1.26207	4.87875e-05
ITGB3	3690	integrin subunit beta 3	-0.726737	4.93143e-05
GALNT1	2589	polypeptide N-acetylgalactosaminyltransferase 1	-0.721988	4.99227e-05
ADAM9	8754	ADAM metallopeptidase domain 9	-1.67827	5.43295e-05
HGSNAT	138050	heparan-alpha-glucosaminide N-acetyltransferase	-0.874531	5.52526e-05
SHC1	6464	SHC adaptor protein 1	-0.711	5.68853e-05
NT5E	4907	5'-nucleotidase ecto	-0.712381	5.6939e-05
NTN4	59277	netrin 4	-1.1444	5.77549e-05
SMAP2	64744	small ArfGAP2	-0.963971	5.89273e-05
TTL	150465	tubulin tyrosine ligase	-0.623186	6.4117e-05
CAV2	858	caveolin 2	-1.23322	7.34217e-05
FZD4	8322	frizzled class receptor 4	-0.769245	7.57287e-05
SLC25A24	29957	solute carrier family 25 member 24	-1.06186	7.73665e-05
LYL1	4066	LYL1 basic helix-loop-helix family member	-1.02103	7.86145e-05
FLNC	2318	filamin C	-0.586781	8.1753e-05
F2RL3	9002	F2R like thrombin or trypsin receptor 3	-1.80729	8.39338e-05
COL4A1	1282	collagen type IV alpha 1 chain	-0.745684	8.58817e-05
TBX1	6899	T-box transcription factor 1	-0.955345	8.7973e-05
HERC5	51191	HECT and RLD domain containing E3 ubiquitin protein ligase 5	1.03194	9.00765e-05
PGF	5228	placental growth factor	-0.806171	9.13178e-05
C5orf15	56951	chromosome 5 open reading frame 15	-0.741284	9.36715e-05
RAB6A	5870	RAB6A, member RAS oncogene family	-0.699073	9.87808e-05
ZDHHC2	51201	zinc finger DHHC-type palmitoyltransferase 2	-1.2558	0.000100239
FAM20C	56975	FAM20C golgi associated secretory pathway kinase	-0.593	0.000102259
RASIP1	54922	Ras interacting protein 1	-1.00353	0.00010438
MYCT1	80177	MYC target 1	-0.704226	0.000104584
DDAH2	23564	dimethylarginine dimethylaminohydrolase 2	-0.898872	0.000104938
TSPAN17	26262	tetraspanin 17	-0.733998	0.000105692
RAI2	10742	retinoic acid induced 2	-1.25993	0.000105736
DKK1	22943	dickkopf WNT signaling pathway inhibitor 1	-1.46633	0.000106998
ADAMTS1	9510	ADAM metallopeptidase with thrombospondin type 1 motif 1	-0.668711	0.000107289
BLCAP	10904	BLCAP apoptosis inducing factor	-0.656657	0.000115843
F2R	2149	coagulation factor II thrombin receptor	-0.900069	0.000117427
PRKACB	5567	protein kinase cAMP-activated catalytic subunit beta	-0.803712	0.000118337
SLC16A3	9123	solute carrier family 16 member 3	-0.672881	0.000120754
UBA5	79876	ubiquitin like modifier activating enzyme 5	-0.935531	0.000126167
DGKA	1606	diacylglycerol kinase alpha	-1.63112	0.000126653
TM6SF1	53346	transmembrane 6 superfamily member 1	-1.09836	0.00012828
TMEM100	55273	transmembrane protein 100	-3.41425	0.00012993
MMRN2	79812	multimerin 2	-0.630303	0.000131859
CCL2	6347	C-C motif chemokine ligand 2	-2.58058	0.000133204
YWHAG	7532	tyrosine 3-monooxygenase/tryptophan 5-monooxygenase activation protein gamma	-0.489382	0.000133301
MAVS	57506	mitochondrial antiviral signaling protein	-0.872425	0.000134437
EGLN2	112398	egl-9 family hypoxia inducible factor 2	-0.740303	0.000136611
PARP4	143	poly(ADP-ribose) polymerase family member 4	-0.874265	0.000140556
TXNDC15	79770	thioredoxin domain containing 15	-0.876615	0.000141532
FURIN	5045	furin, paired basic amino acid cleaving enzyme	-0.697187	0.00014299
ITPR2	3709	inositol 1,4,5-trisphosphate receptor type 2	-1.06489	0.000144944
GPX8	493869	glutathione peroxidase 8 (putative)	-1.36635	0.000145322
PLEKHG5	57449	pleckstrin homology and RhoGEF domain containing G5	-0.916024	0.000147568
AAR2	25980	AAR2 splicing factor	0.603466	0.000153754
EMP1	2012	epithelial membrane protein 1	-1.22648	0.000158189
AHNAK2	113146	AHNAK nucleoprotein 2	-0.97286	0.000167615
NRAS	4893	NRAS proto-oncogene, GTPase	-0.659828	0.000168959
COL5A1	1289	collagen type V alpha 1 chain	-0.531738	0.000173792
MARK4	57787	microtubule affinity regulating kinase 4	-0.654984	0.000183995
ARHGAP18	93663	Rho GTPase activating protein 18	-1.19576	0.000185077
PSTPIP2	9050	proline-serine-threonine phosphatase interacting protein 2	-0.894165	0.000186654
CCDC9B	388115	coiled-coil domain containing 9B	-2.55849	0.00019197
CDH11	1009	cadherin 11	-0.759292	0.000204401
MAP3K6	9064	mitogen-activated protein kinase kinase kinase 6	-1.0919	0.000207603
CD93	22918	CD93 molecule	-1.39827	0.000207784
IL4R	3566	interleukin 4 receptor	-0.66583	0.000210802
PTPRA	5786	protein tyrosine phosphatase receptor type A	-0.579758	0.000219974
ALDH1A3	220	aldehyde dehydrogenase 1 family member A3	-0.784246	0.000221565
MIR22HG	84981	MIR22 host gene	-1.13764	0.000222023
IFIT2	3433	interferon induced protein with tetratricopeptide repeats 2	1.49877	0.000226887
SYNPO	11346	synaptopodin	-0.958966	0.000230655
ANXA11	311	annexin A11	-0.791797	0.000230787
THBD	7056	thrombomodulin	-1.44916	0.000232477
PNMA1	9240	PNMA family member 1	-0.504368	0.000236612
ACVRL1	94	activin A receptor like type 1	-1.01825	0.000243114
MKNK2	2872	MAPK interacting serine/threonine kinase 2	0.472343	0.000246339
PREX1	57580	phosphatidylinositol-3,4,5-trisphosphate dependent Rac exchange factor 1	-0.735379	0.000249257
HNRNPC	3183	heterogeneous nuclear ribonucleoprotein C	0.509332	0.00025331
PAPSS2	9060	3'-phosphoadenosine 5'-phosphosulfate synthase 2	-1.01638	0.000255872
PDLIM4	8572	PDZ and LIM domain 4	-0.854531	0.000256759
COPG1	22820	coatomer protein complex subunit gamma 1	-0.894275	0.000261551
CD58	965	CD58 molecule	-1.08929	0.00026216
DKK2	27123	dickkopf WNT signaling pathway inhibitor 2	-2.27327	0.000264974
CACNA2D1	781	calcium voltage-gated channel auxiliary subunit alpha2delta 1	-0.894984	0.000265096
PAM	5066	peptidylglycine alpha-amidating monooxygenase	-0.532559	0.000266861
COCH	1690	cochlin	0.780643	0.000271572
FGD5	152273	FYVE, RhoGEF and PH domain containing 5	-0.689429	0.000274715
DPY19L1	23333	dpy-19 like C-mannosyltransferase 1	-0.832994	0.000287257
CAP1	10487	cyclase associated actin cytoskeleton regulatory protein 1	-0.729416	0.000301689
TMBIM1	64114	transmembrane BAX inhibitor motif containing 1	-0.668951	0.00030272
SLC35A5	55032	solute carrier family 35 member A5	-0.987348	0.00031258
NOVA2	4858	NOVA alternative splicing regulator 2	-1.78643	0.000315625
CAPRIN2	65981	caprin family member 2	-0.850768	0.000316427
ABI3	51225	ABI family member 3	-1.05625	0.000317494
UBE4A	9354	ubiquitination factor E4A	-0.706787	0.000318274
EPHB4	2050	EPH receptor B4	-0.596821	0.000336463
HDAC7	51564	histone deacetylase 7	-0.823934	0.000340921
CRABP2	1382	cellular retinoic acid binding protein 2	0.778985	0.000350633
ZBED6	100381270	zinc finger BED-type containing 6	-0.934294	0.000353072
S1PR1	1901	sphingosine-1-phosphate receptor 1	-0.789764	0.000359144
TPM1	7168	tropomyosin 1	-1.29653	0.000376202
STARD8	9754	StAR related lipid transfer domain containing 8	-1.47708	0.000378593
RAB3B	5865	RAB3B, member RAS oncogene family	-0.698579	0.000378984
ATP6V1A	523	ATPase H+ transporting V1 subunit A	-0.619382	0.00038389
MIR31HG	554202	MIR31 host gene	-1.84197	0.000389192
ARAP1	116985	ArfGAP with RhoGAP domain, ankyrin repeat and PH domain 1	-1.03611	0.00039198
IL17RB	55540	interleukin 17 receptor B	0.777265	0.000397518
GRB14	2888	growth factor receptor bound protein 14	-1.18801	0.000397579
BCL2L1	598	BCL2 like 1	-0.922678	0.000398528
TBX18	9096	T-box transcription factor 18	-1.51746	0.000405623
ARRB1	408	arrestin beta 1	-0.74713	0.000414038
DNAJC30	84277	DnaJ heat shock protein family (Hsp40) member C30	-1.28069	0.000421359
INSYN2B	100131897	inhibitory synaptic factor family member 2B	-1.77569	0.000423539
NOX4	50507	NADPH oxidase 4	-1.25696	0.000426121
CARD6	84674	caspase recruitment domain family member 6	-0.898666	0.000430674
HHIP-AS1	646576	HHIP antisense RNA 1	-1.15777	0.000434314
TUBA1A	7846	tubulin alpha 1a	-0.939377	0.000434779
SH3TC1	54436	SH3 domain and tetratricopeptide repeats 1	-1.1321	0.000436456
CNOT11	55571	CCR4-NOT transcription complex subunit 11	-0.652441	0.000462817
TSPAN15	23555	tetraspanin 15	-0.840283	0.000465441
FLI1	2313	Fli-1 proto-oncogene, ETS transcription factor	-0.621683	0.000471566
DAB2	1601	DAB adaptor protein 2	-0.705588	0.000473568
RNF187	149603	ring finger protein 187	-0.666955	0.000488081
WWC3	55841	WWC family member 3	-0.704653	0.000496925
PRKAR1A	5573	protein kinase cAMP-dependent type I regulatory subunit alpha	-0.829106	0.00049911
PTPRB	5787	protein tyrosine phosphatase receptor type B	-1.15925	0.000499836
PEAR1	375033	platelet endothelial aggregation receptor 1	-0.785071	0.00050005
INTS3	65123	integrator complex subunit 3	-0.780904	0.000511245
ATP2B4	493	ATPase plasma membrane Ca2+ transporting 4	-1.65446	0.000511301
RACK1	10399	receptor for activated C kinase 1	0.534956	0.000520393
SLC9A3R2	9351	SLC9A3 regulator 2	-1.13024	0.000522974
IL1R1	3554	interleukin 1 receptor type 1	-0.951358	0.000549581
FADD	8772	Fas associated via death domain	-1.06816	0.000557606
CNOT4	4850	CCR4-NOT transcription complex subunit 4	0.517574	0.000562347
CSF2RB	1439	colony stimulating factor 2 receptor beta common subunit	-1.05955	0.00056981
TUBB6	84617	tubulin beta 6 class V	-0.623208	0.000574403
TNFRSF1A	7132	TNF receptor superfamily member 1A	-0.845653	0.000580514
CDC42EP2	10435	CDC42 effector protein 2	-0.958689	0.00059444
CDH2	1000	cadherin 2	-0.492311	0.000598363
CDC42BPB	9578	CDC42 binding protein kinase beta	-0.601368	0.000601847
KNOP1	400506	lysine rich nucleolar protein 1	-0.68272	0.000608192
BAG1	573	BCL2 associated athanogene 1	0.476263	0.000614903
LINC02762	283140	long intergenic non-protein coding RNA 2762	-2.09316	0.000615981
MARCKS	4082	myristoylated alanine rich protein kinase C substrate	-0.570617	0.000623352
SHISA5	51246	shisa family member 5	-0.706428	0.000629655
MLLT11	10962	MLLT11 transcription factor 7 cofactor	-1.57971	0.000649018
TSKU	25987	tsukushi, small leucine rich proteoglycan	-0.868854	0.00067633
FANCC	2176	FA complementation group C	0.779685	0.000677027
LMAN2L	81562	lectin, mannose binding 2 like	-0.968509	0.000677142
FAT4	79633	FAT atypical cadherin 4	-1.25433	0.000685343
ARHGAP31	57514	Rho GTPase activating protein 31	-0.835234	0.000692182
STK38	11329	serine/threonine kinase 38	-0.569164	0.000695028
TNFSF4	7292	TNF superfamily member 4	-1.50724	0.000713479
SAE1	10055	SUMO1 activating enzyme subunit 1	0.405288	0.000717552
EXOC3L1	283849	exocyst complex component 3 like 1	-2.22423	0.000724954
SFXN3	81855	sideroflexin 3	-1.02688	0.000736703
CLDN4	1364	claudin 4	1.42215	0.000737141
MTFR1L	56181	mitochondrial fission regulator 1 like	-0.758188	0.000746833
TPRG1L	127262	tumor protein p63 regulated 1 like	-0.639509	0.000752907
FEZ2	9637	fasciculation and elongation protein zeta 2	-0.592496	0.000755656
ENC1	8507	ectodermal-neural cortex 1	-1.0658	0.000784256
LRRC4	64101	leucine rich repeat containing 4	-1.32831	0.000786319
ZDHHC21	340481	zinc finger DHHC-type containing 21	-1.10659	0.000788905
AP1M1	8907	adaptor related protein complex 1 subunit mu 1	-0.469151	0.000789214
NRSN2	80023	neurensin 2	-0.896733	0.000790549
LAMA5	3911	laminin subunit alpha 5	0.443025	0.000792227
SLFN11	91607	schlafen family member 11	-0.687146	0.000795443
CALHM2	51063	calcium homeostasis modulator family member 2	-1.53358	0.000805338
UPF3B	65109	UPF3B regulator of nonsense mediated mRNA decay	0.482515	0.000814454
NUDT18	79873	nudix hydrolase 18	-1.83393	0.000825442
OSGIN2	734	oxidative stress induced growth inhibitor family member 2	-0.854767	0.000829693
CCDC68	80323	coiled-coil domain containing 68	-1.8137	0.000834838
RASA3	22821	RAS p21 protein activator 3	-0.687939	0.000844756
ERLEC1	27248	endoplasmic reticulum lectin 1	-0.627259	0.000849889
CSF1	1435	colony stimulating factor 1	0.709704	0.000853385
RALB	5899	RAS like proto-oncogene B	-0.862928	0.000872953
CD34	947	CD34 molecule	-1.03787	0.000883759
ART4	420	ADP-ribosyltransferase 4 (Dombrock blood group)	-1.97595	0.000890688
CDKN2A	1029	cyclin dependent kinase inhibitor 2A	0.507146	0.000893027
DNAJB6	10049	DnaJ heat shock protein family (Hsp40) member B6	0.424477	0.000894065
ICAM1	3383	intercellular adhesion molecule 1	1.06022	0.000901912
FAM107B	83641	family with sequence similarity 107 member B	-0.456538	0.00090656
DPYSL3	1809	dihydropyrimidinase like 3	-0.600987	0.000908083
TAMM41	132001	TAM41 mitochondrial translocator assembly and maintenance homolog	-1.30156	0.000924328
SYNRG	11276	synergin gamma	1.03399	0.000925698
CAVIN3	112464	caveolae associated protein 3	-1.24755	0.000962735
LFNG	3955	LFNG O-fucosylpeptide 3-beta-N-acetylglucosaminyltransferase	-0.982506	0.000963418
NOS3	4846	nitric oxide synthase 3	-1.41513	0.000969873
LEPROT	54741	leptin receptor overlapping transcript	-1.05738	0.000976061
ADAM10	102	ADAM metallopeptidase domain 10	-0.684969	0.000979193
NEK6	10783	NIMA related kinase 6	-0.775854	0.000993005
DDAH1	23576	dimethylarginine dimethylaminohydrolase 1	-0.58622	0.000997464
AHNAK	79026	AHNAK nucleoprotein	-0.831473	0.00100657
NAV3	89795	neuron navigator 3	-0.928191	0.00101551
SCRN1	9805	secernin 1	-0.548253	0.00101746
LYPLA1	10434	lysophospholipase 1	-0.470007	0.00104858
TMEM18	129787	transmembrane protein 18	0.595747	0.00105107
MAP3K11	4296	mitogen-activated protein kinase kinase kinase 11	-0.484011	0.00106407
TP53BP1	7158	tumor protein p53 binding protein 1	-0.564559	0.0010658
MARVELD1	83742	MARVEL domain containing 1	-0.499706	0.00107065
DOLK	22845	dolichol kinase	-0.966414	0.00110093
TSPAN31	6302	tetraspanin 31	-1.5117	0.00110563
VEPH1	79674	ventricular zone expressed PH domain containing 1	-0.925633	0.00110609
ATP8B2	57198	ATPase phospholipid transporting 8B2	-0.894314	0.00112455
THEMIS2	9473	thymocyte selection associated family member 2	-1.39032	0.00112595
NFIB	4781	nuclear factor I B	-0.544286	0.00112834
PCLAF	9768	PCNA clamp associated factor	0.645116	0.00112996
PFN2	5217	profilin 2	-0.94616	0.00113163
GLT8D1	55830	glycosyltransferase 8 domain containing 1	-0.81146	0.0011382
ARL10	285598	ADP ribosylation factor like GTPase 10	1.1218	0.00114894
RAPGEF2	9693	Rap guanine nucleotide exchange factor 2	-0.686444	0.00115428
CRACD	57482	capping protein inhibiting regulator of actin dynamics	-1.24323	0.00116425
IL6ST	3572	interleukin 6 signal transducer	-0.620007	0.00116957
TRIM8	81603	tripartite motif containing 8	-0.593161	0.00117675
ASF1A	25842	anti-silencing function 1A histone chaperone	-0.759116	0.00118006
DYNLL1	8655	dynein light chain LC8-type 1	-0.55886	0.0011883
NLRP1	22861	NLR family pyrin domain containing 1	-0.798138	0.00119054
RPS2	6187	ribosomal protein S2	0.505894	0.00120385
SPOCK1	6695	SPARC (osteonectin), cwcv and kazal like domains proteoglycan 1	-0.603206	0.00121162
DYNC1I2	1781	dynein cytoplasmic 1 intermediate chain 2	-0.595589	0.00122671
RPIA	22934	ribose 5-phosphate isomerase A	0.519815	0.00122837
CCDC71L	168455	coiled-coil domain containing 71 like	-0.727678	0.00122975
CYB561	1534	cytochrome b561	-0.644373	0.00124235
ATP8B1	5205	ATPase phospholipid transporting 8B1	-0.988156	0.00124475
GAL	51083	galanin and GMAP prepropeptide	0.549549	0.00126312
ALKBH6	84964	alkB homolog 6	-1.24084	0.00126764
LUC7L3	51747	LUC7 like 3 pre-mRNA splicing factor	0.448175	0.00127357
NIBAN2	64855	niban apoptosis regulator 2	-0.410671	0.00128251
MMGT1	93380	membrane magnesium transporter 1	-0.798189	0.00128411
MAP4	4134	microtubule associated protein 4	-0.468874	0.00128683
NKAIN1	79570	sodium/potassium transporting ATPase interacting 1	1.45998	0.00129128
TNFRSF21	27242	TNF receptor superfamily member 21	-0.851265	0.00130095
TMEM87B	84910	transmembrane protein 87B	-1.02604	0.00130627
DIPK1B	138311	divergent protein kinase domain 1B	-0.767714	0.00131105
IL1RL1	9173	interleukin 1 receptor like 1	-1.29873	0.00133647
KLF13	51621	Kruppel like factor 13	-0.961839	0.00134554
HLA-A	3105	major histocompatibility complex, class I, A	0.418146	0.00135115
FRMD5	84978	FERM domain containing 5	-1.29729	0.00138248
B4GALT6	9331	beta-1,4-galactosyltransferase 6	-1.01556	0.001385
FRMD4B	23150	FERM domain containing 4B	-0.834774	0.00141086
RBM34	23029	RNA binding motif protein 34	0.387606	0.00141118
FUCA2	2519	alpha-L-fucosidase 2	0.42292	0.00141762
AURKB	9212	aurora kinase B	0.667534	0.00141861
TRIM27	5987	tripartite motif containing 27	-0.505651	0.00145778
STING1	340061	stimulator of interferon response cGAMP interactor 1	-0.672621	0.00146646
IGF2BP3	10643	insulin like growth factor 2 mRNA binding protein 3	-0.681392	0.00148886
WASF1	8936	WASP family member 1	-0.645714	0.00150083
SNCA	6622	synuclein alpha	-0.608145	0.00153351
LINC01013	100507254	long intergenic non-protein coding RNA 1013	-1.6726	0.00153777
CALHM5	254228	calcium homeostasis modulator family member 5	-0.874058	0.001542
SEC23A	10484	Sec23 homolog A, coat complex II component	-0.594314	0.00154838
ELOVL1	64834	ELOVL fatty acid elongase 1	-0.625889	0.00155109
EXOSC5	56915	exosome component 5	0.457364	0.00155394
ZBTB7B	51043	zinc finger and BTB domain containing 7B	-0.859019	0.00155539
HARS2	23438	histidyl-tRNA synthetase 2, mitochondrial	-0.905155	0.00157248
CLIC4	25932	chloride intracellular channel 4	-0.42674	0.00158375
FAM124B	79843	family with sequence similarity 124 member B	-1.02178	0.00161004
BTN1A1	696	butyrophilin subfamily 1 member A1	0.650272	0.00162228
DHX32	55760	DEAH-box helicase 32 (putative)	-0.935085	0.00163671
SLC12A4	6560	solute carrier family 12 member 4	-0.503759	0.00163937
KLHL9	55958	kelch like family member 9	-0.692121	0.00164049
ZNF84	7637	zinc finger protein 84	0.702261	0.00164338
CCDC116	164592	coiled-coil domain containing 116	1.52318	0.00164723
RRAS	6237	RAS related	-0.971001	0.00165408
PLXNA4	91584	plexin A4	-1.0425	0.00165703
MALL	7851	mal, T cell differentiation protein like	-1.19216	0.00166027
SERPINB8	5271	serpin family B member 8	-0.724183	0.00166341
BAG3	9531	BCL2 associated athanogene 3	0.472276	0.00167008
HEY2	23493	hes related family bHLH transcription factor with YRPW motif 2	-0.479343	0.00167145
NOB1	28987	NIN1 (RPN12) binding protein 1 homolog	0.364693	0.00167245
RAB32	10981	RAB32, member RAS oncogene family	-0.639927	0.0016798
SKAP2	8935	src kinase associated phosphoprotein 2	-0.815476	0.00168641
FAM43A	131583	family with sequence similarity 43 member A	-0.688594	0.00169495
STC2	8614	stanniocalcin 2	-0.559539	0.00170078
ARFGEF1	10565	ADP ribosylation factor guanine nucleotide exchange factor 1	-0.741589	0.00170348
LIX1L	128077	limb and CNS expressed 1 like	-0.790233	0.00170455
PCYT2	5833	phosphate cytidylyltransferase 2, ethanolamine	-0.830889	0.00171158
ITGA5	3678	integrin subunit alpha 5	-0.699759	0.00171943
NDUFC2	4718	NADH:ubiquinone oxidoreductase subunit C2	-1.00995	0.00172904
SNHG8	100093630	small nucleolar RNA host gene 8	0.562723	0.00173232
CALCRL	10203	calcitonin receptor like receptor	-0.747995	0.00174657
CENPU	79682	centromere protein U	0.393502	0.00175429
ANGPTL4	51129	angiopoietin like 4	-0.96572	0.00177369
ADAMTS6	11174	ADAM metallopeptidase with thrombospondin type 1 motif 6	-1.88468	0.00177866
KCNH3	23416	potassium voltage-gated channel subfamily H member 3	1.42649	0.00177967
PARS2	25973	prolyl-tRNA synthetase 2, mitochondrial	-1.42173	0.00178385
ITPR1	3708	inositol 1,4,5-trisphosphate receptor type 1	-0.845836	0.00179946
JCAD	57608	junctional cadherin 5 associated	-0.875495	0.00180412
C8orf58	541565	chromosome 8 open reading frame 58	-1.35233	0.0018099
DHH	50846	desert hedgehog signaling molecule	-1.77387	0.00183117
ACAA2	10449	acetyl-CoA acyltransferase 2	-0.778584	0.00183846
CCDC59	29080	coiled-coil domain containing 59	0.543875	0.0018702
SH3PXD2B	285590	SH3 and PX domains 2B	-0.872557	0.00187984
THBS1	7057	thrombospondin 1	-0.702379	0.00190426
MAX	4149	MYC associated factor X	0.518624	0.00191304
COX20	116228	cytochrome c oxidase assembly factor COX20	-0.897888	0.00191523
TTLL1	25809	tubulin tyrosine ligase like 1	-1.30558	0.00191534
CDKN1A	1026	cyclin dependent kinase inhibitor 1A	-0.438355	0.00193149
CAT	847	catalase	-1.12053	0.00193466
AKR1C3	8644	aldo-keto reductase family 1 member C3	-1.53801	0.00196037
RAPGEF5	9771	Rap guanine nucleotide exchange factor 5	-0.87947	0.00198596
PTP4A2	8073	protein tyrosine phosphatase 4A2	-0.39493	0.00201206
PCTP	58488	phosphatidylcholine transfer protein	-1.20269	0.00203867
CTTN	2017	cortactin	-0.387438	0.00206728
SMTN	6525	smoothelin	-0.584351	0.00206732
ANTXR2	118429	ANTXR cell adhesion molecule 2	-0.428436	0.00209799
SORBS2	8470	sorbin and SH3 domain containing 2	-1.57666	0.00213102
FLT1	2321	fms related tyrosine kinase 1	-0.495119	0.00214803
HEATR3	55027	HEAT repeat containing 3	-0.645861	0.00216597
RBM38	55544	RNA binding motif protein 38	0.415844	0.0021783
ARMCX6	54470	armadillo repeat containing X-linked 6	-0.731001	0.00219024
CYP1A1	1543	cytochrome P450 family 1 subfamily A member 1	-1.11132	0.00219115
SPINT1	6692	serine peptidase inhibitor, Kunitz type 1	0.789231	0.00220367
SERINC3	10955	serine incorporator 3	-0.537191	0.00222935
SLC2A6	11182	solute carrier family 2 member 6	-0.809549	0.00224969
MYOM3	127294	myomesin 3	-1.59533	0.00225295
CPNE5	57699	copine 5	-1.20278	0.00225788
ENDOD1	23052	endonuclease domain containing 1	-0.538157	0.00225879
ITGB3BP	23421	integrin subunit beta 3 binding protein	0.548534	0.0022596
AHRR	57491	aryl-hydrocarbon receptor repressor	-0.670605	0.00227475
BET1	10282	Bet1 golgi vesicular membrane trafficking protein	-0.673675	0.00230092
SH2B3	10019	SH2B adaptor protein 3	-0.396311	0.00231125
LMAN1	3998	lectin, mannose binding 1	-0.371905	0.002317
BRI3	25798	brain protein I3	-0.55883	0.00233463
UHMK1	127933	U2AF homology motif kinase 1	-0.630545	0.00233493
PDE7A	5150	phosphodiesterase 7A	-0.679168	0.00234371
ALKBH2	121642	alkB homolog 2, alpha-ketoglutarate dependent dioxygenase	0.466294	0.00237951
MELTF	4241	melanotransferrin	0.662112	0.00238164
GPR4	2828	G protein-coupled receptor 4	-0.924556	0.00238634
TNIK	23043	TRAF2 and NCK interacting kinase	-0.868008	0.00238937
GOLIM4	27333	golgi integral membrane protein 4	-0.512824	0.00244058
PARVA	55742	parvin alpha	-0.585639	0.00245111
PIP5K1C	23396	phosphatidylinositol-4-phosphate 5-kinase type 1 gamma	-0.471796	0.00245938
RNF14	9604	ring finger protein 14	-0.596918	0.00247678
TLN1	7094	talin 1	-0.513831	0.00249038
SNTB2	6645	syntrophin beta 2	-0.777066	0.00249042
MCM7	4176	minichromosome maintenance complex component 7	0.483965	0.00249538
FGF12	2257	fibroblast growth factor 12	-0.897076	0.00253024
LRRC34	151827	leucine rich repeat containing 34	-1.45005	0.00254025
WAC-AS1	220906	WAC antisense RNA 1 (head to head)	-0.867323	0.00254369
MAGED1	9500	MAGE family member D1	-0.663466	0.00255477
VPS13D	55187	vacuolar protein sorting 13 homolog D	-0.709983	0.00256992
TSPAN9	10867	tetraspanin 9	-0.60201	0.00257531
MYOF	26509	myoferlin	-0.820694	0.00258495
BTF3	689	basic transcription factor 3	0.521575	0.00259823
PTTG1	9232	PTTG1 regulator of sister chromatid separation, securin	0.540178	0.00262882
TCEAL8	90843	transcription elongation factor A like 8	-0.91994	0.00263618
SLFN5	162394	schlafen family member 5	-0.619017	0.00265705
PHF20L1	51105	PHD finger protein 20 like 1	-0.54067	0.00267541
COL2A1	1280	collagen type II alpha 1 chain	2.53599	0.00268441
SEL1L3	23231	SEL1L family member 3	-0.65359	0.00269386
MICAL2	9645	microtubule associated monooxygenase, calponin and LIM domain containing 2	-0.496223	0.00270418
ARAP3	64411	ArfGAP with RhoGAP domain, ankyrin repeat and PH domain 3	-0.616063	0.00273215
FLVCR1	28982	feline leukemia virus subgroup C cellular receptor 1	-0.910898	0.00273419
FRMD4A	55691	FERM domain containing 4A	-0.741275	0.0027559
FAAP100	80233	FA core complex associated protein 100	-0.584202	0.0028086
MAML3	55534	mastermind like transcriptional coactivator 3	-1.52354	0.00282568
SS18	6760	SS18 subunit of BAF chromatin remodeling complex	-0.460206	0.0028538
ALDH1A1	216	aldehyde dehydrogenase 1 family member A1	-0.877436	0.00286055
DBNL	28988	drebrin like	-1.04104	0.00288132
SET	6418	SET nuclear proto-oncogene	0.378172	0.00288932
BIRC5	332	baculoviral IAP repeat containing 5	0.47852	0.00289098
TRIM47	91107	tripartite motif containing 47	-0.607283	0.00289737
BMX	660	BMX non-receptor tyrosine kinase	-0.804434	0.00290592
ITGA6	3655	integrin subunit alpha 6	-0.66487	0.00291118
LMO2	4005	LIM domain only 2	-1.32536	0.00291814
WDFY1	57590	WD repeat and FYVE domain containing 1	-0.680293	0.00295009
UBBP4	23666	ubiquitin B pseudogene 4	1.11341	0.00295739
SPIN4	139886	spindlin family member 4	-1.0636	0.00295994
GIMAP8	155038	GTPase, IMAP family member 8	-1.16183	0.00297972
APPBP2	10513	amyloid beta precursor protein binding protein 2	-0.772515	0.00300383
RHOJ	57381	ras homolog family member J	-0.801094	0.00302358
RAP2C	57826	RAP2C, member of RAS oncogene family	-0.643931	0.00304421
ALG6	29929	ALG6 alpha-1,3-glucosyltransferase	-0.705668	0.00304792
TSPAN14	81619	tetraspanin 14	-0.597163	0.00308831
HAPLN3	145864	hyaluronan and proteoglycan link protein 3	0.801571	0.00310126
RELN	5649	reelin	-0.734006	0.00311005
VASP	7408	vasodilator stimulated phosphoprotein	-0.858887	0.00314573
SMCO2	341346	single-pass membrane protein with coiled-coil domains 2	1.23735	0.00314809
DYNC1H1	1778	dynein cytoplasmic 1 heavy chain 1	-0.412042	0.00316969
PMS2P1	5379	PMS1 homolog 2, mismatch repair system component pseudogene 1	-0.721792	0.00323961
C14orf132	56967	chromosome 14 open reading frame 132	-1.93555	0.00324928
STMP1	647087	short transmembrane mitochondrial protein 1	-0.683634	0.00325825
NEU3	10825	neuraminidase 3	-0.840591	0.00333261
BTBD19	149478	BTB domain containing 19	-1.20342	0.00337443
NACA	4666	nascent polypeptide associated complex subunit alpha	0.387901	0.00337875
TRPV2	51393	transient receptor potential cation channel subfamily V member 2	-1.40221	0.00339251
CPSF2	53981	cleavage and polyadenylation specific factor 2	-0.636152	0.00340221
SNRPB	6628	small nuclear ribonucleoprotein polypeptides B and B1	0.428272	0.00341553
USP22	23326	ubiquitin specific peptidase 22	-0.302296	0.00344442
ASAP2	8853	ArfGAP with SH3 domain, ankyrin repeat and PH domain 2	-0.67258	0.00345622
PXN	5829	paxillin	-0.650507	0.00347444
PLEKHA1	59338	pleckstrin homology domain containing A1	-0.733619	0.00347446
PRDX3	10935	peroxiredoxin 3	-0.525412	0.00348125
ERG	2078	ETS transcription factor ERG	-0.511043	0.00350143
TRIOBP	11078	TRIO and F-actin binding protein	-0.695002	0.00354943
CAMTA2	23125	calmodulin binding transcription activator 2	-0.924505	0.00355683
TOP2B	7155	DNA topoisomerase II beta	-0.548761	0.00360255
DAZAP2	9802	DAZ associated protein 2	0.410215	0.00362636
PJA2	9867	praja ring finger ubiquitin ligase 2	-0.481056	0.00363433
C1QL1	10882	complement C1q like 1	0.654018	0.00363905
BLOC1S3	388552	biogenesis of lysosomal organelles complex 1 subunit 3	-1.21478	0.00364406
SMAD9	4093	SMAD family member 9	-0.971864	0.00364521
ZNRF1	84937	zinc and ring finger 1	-0.682541	0.00366734
PTPN14	5784	protein tyrosine phosphatase non-receptor type 14	-0.416882	0.00366899
RAB31	11031	RAB31, member RAS oncogene family	-0.675266	0.00367247
PCGF2	7703	polycomb group ring finger 2	-0.603783	0.00370262
TMEM200C	645369	transmembrane protein 200C	-1.94648	0.00370757
EHD2	30846	EH domain containing 2	-0.693023	0.00375596
SMURF2	64750	SMAD specific E3 ubiquitin protein ligase 2	-0.414624	0.00375624
RPL17-C18orf32	100526842	RPL17-C18orf32 readthrough	1.31585	0.00376268
LASP1	3927	LIM and SH3 protein 1	-0.539552	0.00376284
POR	5447	cytochrome p450 oxidoreductase	-0.480067	0.00379298
TMEM263	90488	transmembrane protein 263	-0.696595	0.00383525
LRP10	26020	LDL receptor related protein 10	-0.478943	0.00383725
CTDSP1	58190	CTD small phosphatase 1	-0.583999	0.00385747
MVP	9961	major vault protein	-1.06525	0.00388063
NUDT12	83594	nudix hydrolase 12	-1.43304	0.00389139
CHCHD2	51142	coiled-coil-helix-coiled-coil-helix domain containing 2	0.430795	0.003898
CAV1	857	caveolin 1	-0.954312	0.00393464
APOE	348	apolipoprotein E	0.777396	0.0039379
FAM210B	116151	family with sequence similarity 210 member B	-0.584912	0.00394291
NAV1	89796	neuron navigator 1	-0.802994	0.00395375
CLN8	2055	CLN8 transmembrane ER and ERGIC protein	-0.570811	0.00396443
NYNRIN	57523	NYN domain and retroviral integrase containing	-1.82392	0.00397115
SRGN	5552	serglycin	-1.00331	0.00398773
CLTC	1213	clathrin heavy chain	-0.522408	0.00400787
HABP4	22927	hyaluronan binding protein 4	-0.688592	0.00403256
CDYL2	124359	chromodomain Y like 2	-0.735063	0.00405807
LIMK2	3985	LIM domain kinase 2	-0.436384	0.00412732
RPS20	6224	ribosomal protein S20	0.500701	0.00412812
RPS26P19	100271110	ribosomal protein S26 pseudogene 19	-4.95495	0.00414501
IQCJ-SCHIP1	100505385	IQCJ-SCHIP1 readthrough	-0.687138	0.00418532
JAK1	3716	Janus kinase 1	-0.444706	0.00419945
CENPO	79172	centromere protein O	0.36329	0.00422211
C1orf52	148423	chromosome 1 open reading frame 52	0.417915	0.00422471
MATR3	9782	matrin 3	0.347166	0.00423987
CENPH	64946	centromere protein H	0.533016	0.00426484
NUDT16	131870	nudix hydrolase 16	-1.04179	0.00427362
AAK1	22848	AP2 associated kinase 1	-0.595782	0.00432021
ZBTB4	57659	zinc finger and BTB domain containing 4	-0.714825	0.00434368
IFIH1	64135	interferon induced with helicase C domain 1	1.1486	0.00434599
KLHL6	89857	kelch like family member 6	-0.69455	0.00434684
PABPC1	26986	poly(A) binding protein cytoplasmic 1	0.365735	0.00435861
SOX18	54345	SRY-box transcription factor 18	-0.631748	0.00436573
MBTPS2	51360	membrane bound transcription factor peptidase, site 2	-0.770402	0.00438505
EIF4H	7458	eukaryotic translation initiation factor 4H	0.358632	0.00440795
MARCKSL1	65108	MARCKS like 1	-0.480715	0.00441374
SLC38A3	10991	solute carrier family 38 member 3	0.983753	0.00441948
C8orf82	414919	chromosome 8 open reading frame 82	-0.978874	0.0044258
CASP6	839	caspase 6	-0.761574	0.00446543
TMEM222	84065	transmembrane protein 222	0.387947	0.00446604
ADCY4	196883	adenylate cyclase 4	-0.59185	0.00446806
CCNB1IP1	57820	cyclin B1 interacting protein 1	0.442374	0.00447612
ARMCX1	51309	armadillo repeat containing X-linked 1	-0.639378	0.00449114
EIF2AK4	440275	eukaryotic translation initiation factor 2 alpha kinase 4	-0.657457	0.00451245
SLC38A2	54407	solute carrier family 38 member 2	-0.851683	0.00452111
ZNF652	22834	zinc finger protein 652	-1.28793	0.00452362
SEPTIN9	10801	septin 9	-0.50308	0.00453452
NXPE3	91775	neurexophilin and PC-esterase domain family member 3	-0.772101	0.00456599
LZTR1	8216	leucine zipper like transcription regulator 1	-0.634203	0.00456771
HNRNPA0	10949	heterogeneous nuclear ribonucleoprotein A0	0.353291	0.00457295
DNAJC10	54431	DnaJ heat shock protein family (Hsp40) member C10	-0.516926	0.00457996
PLXNB2	23654	plexin B2	-0.464231	0.00458177
VPS54	51542	VPS54 subunit of GARP complex	-0.617629	0.004637
NACC2	138151	NACC family member 2	-0.452526	0.00463771
FMNL3	91010	formin like 3	-0.46981	0.0047019
RECK	8434	reversion inducing cysteine rich protein with kazal motifs	-0.693038	0.00472376
TRAK1	22906	trafficking kinesin protein 1	-0.490216	0.00473203
SRD5A3	79644	steroid 5 alpha-reductase 3	-0.502159	0.00475274
MAP1A	4130	microtubule associated protein 1A	-1.00879	0.00476316
VPS25	84313	vacuolar protein sorting 25 homolog	-0.677971	0.0047773
ARHGEF19	128272	Rho guanine nucleotide exchange factor 19	-0.863067	0.00482817
TADA3	10474	transcriptional adaptor 3	-0.515347	0.00483677
FANCI	55215	FA complementation group I	0.449962	0.00490095
ZNF622	90441	zinc finger protein 622	0.45011	0.00495418
NAP1L1	4673	nucleosome assembly protein 1 like 1	0.323525	0.00499507
C1orf43	25912	chromosome 1 open reading frame 43	0.372903	0.00502614
ARHGEF1	9138	Rho guanine nucleotide exchange factor 1	-0.60295	0.00503093
IFIT3	3437	interferon induced protein with tetratricopeptide repeats 3	1.32018	0.00507595
SAMD9L	219285	sterile alpha motif domain containing 9 like	-1.61748	0.00509649
RPLP0	6175	ribosomal protein lateral stalk subunit P0	0.43748	0.00515346
CMTM8	152189	CKLF like MARVEL transmembrane domain containing 8	-0.75211	0.00515801
MACROH2A1	9555	macroH2A.1 histone	0.459806	0.00516099
MYLK3	91807	myosin light chain kinase 3	1.27313	0.00520486
DPP7	29952	dipeptidyl peptidase 7	0.36611	0.00521178
NPR2	4882	natriuretic peptide receptor 2	-1.49369	0.00521185
NAB2	4665	NGFI-A binding protein 2	-0.897939	0.00521408
NEB	4703	nebulin	1.64468	0.00527431
CCNE1	898	cyclin E1	0.409078	0.00527956
TPT1	7178	tumor protein, translationally-controlled 1	0.471425	0.00527979
RHBDF1	64285	rhomboid 5 homolog 1	-0.809234	0.00528295
PMAIP1	5366	phorbol-12-myristate-13-acetate-induced protein 1	0.494419	0.00528329
LINC00963	100506190	long intergenic non-protein coding RNA 963	-0.633541	0.00528776
PREB	10113	prolactin regulatory element binding	-0.573887	0.00529447
DYNC1LI2	1783	dynein cytoplasmic 1 light intermediate chain 2	-0.343647	0.00529734
GCNT1	2650	glucosaminyl (N-acetyl) transferase 1	-1.02907	0.00530094
TMEM14B	81853	transmembrane protein 14B	-0.580255	0.00533172
NDUFS2	4720	NADH:ubiquinone oxidoreductase core subunit S2	-0.742712	0.00533575
ALCAM	214	activated leukocyte cell adhesion molecule	-0.414284	0.00534207
ELN	2006	elastin	1.7701	0.00538103
SH3RF3	344558	SH3 domain containing ring finger 3	-0.634952	0.00543803
RBL2	5934	RB transcriptional corepressor like 2	-0.696899	0.00548118
ATF4	468	activating transcription factor 4	0.325572	0.00552735
EDIL3	10085	EGF like repeats and discoidin domains 3	-0.671425	0.00555897
CIP2A	57650	cell proliferation regulating inhibitor of protein phosphatase 2A	0.455649	0.00558389
RET	5979	ret proto-oncogene	1.49392	0.00566013
LYPD1	116372	LY6/PLAUR domain containing 1	-1.24339	0.00567325
FBN1	2200	fibrillin 1	-0.384838	0.00573147
UBE2C	11065	ubiquitin conjugating enzyme E2 C	0.519287	0.00574782
ATOH8	84913	atonal bHLH transcription factor 8	-1.40535	0.00579105
SYNJ2BP	55333	synaptojanin 2 binding protein	-1.16799	0.00581617
TM2D2	83877	TM2 domain containing 2	-0.7263	0.00581659
NOP53	29997	NOP53 ribosome biogenesis factor	0.422662	0.00584293
TMIGD3	57413	transmembrane and immunoglobulin domain containing 3	-1.52605	0.00587529
TMEM184B	25829	transmembrane protein 184B	-0.357914	0.00591539
MIR100HG	399959	mir-100-let-7a-2-mir-125b-1 cluster host gene	-1.0394	0.00598993
SENCR	100507392	smooth muscle and endothelial cell enriched migration/differentiation-associated lncRNA	-1.59218	0.00599052
TGFB1	7040	transforming growth factor beta 1	-0.677264	0.00599515
GALNT16	57452	polypeptide N-acetylgalactosaminyltransferase 16	0.64625	0.00600406
AIFM1	9131	apoptosis inducing factor mitochondria associated 1	-0.520079	0.00601225
SDHA	6389	succinate dehydrogenase complex flavoprotein subunit A	-0.56515	0.00606481
RRBP1	6238	ribosome binding protein 1	-0.43438	0.00607122
SNHG7	84973	small nucleolar RNA host gene 7	0.464212	0.00609007
PKIB	5570	cAMP-dependent protein kinase inhibitor beta	1.43293	0.00611603
TBL3	10607	transducin beta like 3	-0.661748	0.00612034
KIZ	55857	kizuna centrosomal protein	0.555696	0.00613247
ARL6IP5	10550	ADP ribosylation factor like GTPase 6 interacting protein 5	-0.441914	0.00615511
ARHGEF15	22899	Rho guanine nucleotide exchange factor 15	-0.973759	0.00616169
EXOC5	10640	exocyst complex component 5	-0.466113	0.00616983
NOP58	51602	NOP58 ribonucleoprotein	0.429109	0.00617122
FAM110A	83541	family with sequence similarity 110 member A	-0.877828	0.00618257
CAPN5	726	calpain 5	-0.928459	0.00619217
TNFAIP1	7126	TNF alpha induced protein 1	-0.488296	0.00622296
BAK1	578	BCL2 antagonist/killer 1	-0.487294	0.00623222
VPS50	55610	VPS50 subunit of EARP/GARPII complex	-0.79054	0.00624299
ZNF280D	54816	zinc finger protein 280D	-0.879007	0.00624453
SEPTIN11	55752	septin 11	-0.35992	0.00627463
TMED8	283578	transmembrane p24 trafficking protein family member 8	-0.746107	0.00627605
STIM1	6786	stromal interaction molecule 1	-0.48309	0.00629773
MTAP	4507	methylthioadenosine phosphorylase	-0.486856	0.00632984
VSTM4	196740	V-set and transmembrane domain containing 4	0.568247	0.00633598
PDGFA	5154	platelet derived growth factor subunit A	-0.447323	0.00641315
PTPN9	5780	protein tyrosine phosphatase non-receptor type 9	-0.612023	0.00644439
NAA50	80218	N(alpha)-acetyltransferase 50, NatE catalytic subunit	0.33076	0.00646967
SLFN12	55106	schlafen family member 12	-0.818277	0.0065147
TM4SF1	4071	transmembrane 4 L six family member 1	-0.539002	0.00652063
USP6NL	9712	USP6 N-terminal like	-0.514803	0.00652584
HK1	3098	hexokinase 1	-0.385081	0.0065259
CDK8	1024	cyclin dependent kinase 8	0.377883	0.00653704
UNG	7374	uracil DNA glycosylase	0.416504	0.00655053
SLC19A1	6573	solute carrier family 19 member 1	0.415934	0.00656032
TNS1	7145	tensin 1	-1.24876	0.00658613
GABBR2	9568	gamma-aminobutyric acid type B receptor subunit 2	0.386059	0.00659534
CENPK	64105	centromere protein K	0.473049	0.00662336
SGSM2	9905	small G protein signaling modulator 2	0.738215	0.00664696
ABRACL	58527	ABRA C-terminal like	-0.864845	0.00669271
DCHS1	8642	dachsous cadherin-related 1	-0.566562	0.00671776
JUP	3728	junction plakoglobin	-0.770154	0.00675323
UBR7	55148	ubiquitin protein ligase E3 component n-recognin 7 (putative)	-0.481379	0.00676319
KDELR3	11015	KDEL endoplasmic reticulum protein retention receptor 3	-0.892679	0.006782
TXNDC11	51061	thioredoxin domain containing 11	-0.687145	0.00680031
GPRC5A	9052	G protein-coupled receptor class C group 5 member A	-0.622076	0.00684113
EXT1	2131	exostosin glycosyltransferase 1	-0.527758	0.00689928
SMAD7	4092	SMAD family member 7	-0.555858	0.00691146
GALNT7	51809	polypeptide N-acetylgalactosaminyltransferase 7	-0.47992	0.00696148
FXR1	8087	FMR1 autosomal homolog 1	0.298976	0.00699708
MGAT2	4247	alpha-1,6-mannosyl-glycoprotein 2-beta-N-acetylglucosaminyltransferase	-0.461794	0.00702549
PNPLA8	50640	patatin like phospholipase domain containing 8	0.428212	0.00706313
GLCE	26035	glucuronic acid epimerase	-0.417374	0.00706423
MDM2	4193	MDM2 proto-oncogene	-0.441623	0.0070938
PLPP3	8613	phospholipid phosphatase 3	-0.719574	0.00709883
CLK2	1196	CDC like kinase 2	-0.809718	0.00713847
MDK	4192	midkine	0.380594	0.00716529
IGBP1	3476	immunoglobulin binding protein 1	0.402079	0.007173
MTRES1	51250	mitochondrial transcription rescue factor 1	-0.984047	0.00718622
ERVMER34-1	100288413	endogenous retrovirus group MER34 member 1, envelope	-0.839975	0.00720964
OCLN	100506658	occludin	0.831983	0.00722274
CCDC50	152137	coiled-coil domain containing 50	-0.702008	0.00726368
BTK	695	Bruton tyrosine kinase	-1.88532	0.00730396
TM9SF3	56889	transmembrane 9 superfamily member 3	-0.428298	0.00733219
RHOBTB2	23221	Rho related BTB domain containing 2	-0.77171	0.00733633
MAP4K4	9448	mitogen-activated protein kinase kinase kinase kinase 4	-0.293566	0.00733784
ATM	472	ATM serine/threonine kinase	-0.904161	0.00734937
FLOT1	10211	flotillin 1	-0.510589	0.00735593
UBE2D2	7322	ubiquitin conjugating enzyme E2 D2	-0.373859	0.00736879
IFNAR1	3454	interferon alpha and beta receptor subunit 1	-0.580776	0.00737493
SLC35E2B	728661	solute carrier family 35 member E2B	-0.609128	0.00737597
GPR83	10888	G protein-coupled receptor 83	-1.02168	0.00742391
PRKAR2A	5576	protein kinase cAMP-dependent type II regulatory subunit alpha	-0.290651	0.00743338
VPS39	23339	VPS39 subunit of HOPS complex	-0.378562	0.00745576
EBNA1BP2	10969	EBNA1 binding protein 2	0.353284	0.00746038
NOL4L	140688	nucleolar protein 4 like	-0.676461	0.00751402
SLC66A1L	152078	solute carrier family 66 member 1 like	-1.99692	0.00751886
PALMD	54873	palmdelphin	-1.20131	0.00752058
PMP22	5376	peripheral myelin protein 22	-0.76649	0.00752604
ADIPOR2	79602	adiponectin receptor 2	-0.462503	0.00754575
ENKUR	219670	enkurin, TRPC channel interacting protein	-1.02992	0.00756012
ZNF653	115950	zinc finger protein 653	-1.06269	0.00757027
PRDX4	10549	peroxiredoxin 4	0.351831	0.0076087
STAT1	6772	signal transducer and activator of transcription 1	-0.713483	0.00762674
KIF1C	10749	kinesin family member 1C	-0.38822	0.00766741
PIP4K2B	8396	phosphatidylinositol-5-phosphate 4-kinase type 2 beta	-0.449894	0.00774565
SPRYD3	84926	SPRY domain containing 3	-0.446788	0.007807
ILK	3611	integrin linked kinase	-0.818802	0.00784618
SNHG15	285958	small nucleolar RNA host gene 15	0.503083	0.00786618
RNF213	57674	ring finger protein 213	-0.653818	0.00787147
PRDM6	93166	PR/SET domain 6	1.30766	0.00787855
TBC1D15	64786	TBC1 domain family member 15	0.406608	0.00789981
HERC6	55008	HECT and RLD domain containing E3 ubiquitin protein ligase family member 6	1.39537	0.00790209
CRIP2	1397	cysteine rich protein 2	-0.845697	0.0079197
SPAST	6683	spastin	-0.53513	0.00793859
NME1-NME2	654364	NME1-NME2 readthrough	0.56641	0.00794325
DDX39B	7919	DExD-box helicase 39B	0.444966	0.00796882
SLC33A1	9197	solute carrier family 33 member 1	-0.508613	0.00799317
FAN1	22909	FANCD2 and FANCI associated nuclease 1	0.469749	0.00799667
NFE2L2	4780	nuclear factor, erythroid 2 like 2	-0.546737	0.00799949
AKAP11	11215	A-kinase anchoring protein 11	-0.430286	0.0080352
RFX1	5989	regulatory factor X1	-0.776702	0.00804644
TMEM250	90120	transmembrane protein 250	-0.64592	0.00804934
DAG1	1605	dystroglycan 1	-0.36207	0.00806296
PDGFB	5155	platelet derived growth factor subunit B	-1.07186	0.00807535
ABHD4	63874	abhydrolase domain containing 4	-0.603279	0.00808285
SLC48A1	55652	solute carrier family 48 member 1	-0.639009	0.00808451
LENG8	114823	leukocyte receptor cluster member 8	0.634684	0.00809652
TBC1D19	55296	TBC1 domain family member 19	-1.27197	0.00813893
TM9SF1	10548	transmembrane 9 superfamily member 1	-0.544781	0.00814144
NNMT	4837	nicotinamide N-methyltransferase	-1.09673	0.00825773
SFXN2	118980	sideroflexin 2	-1.23748	0.00826163
TMEM38B	55151	transmembrane protein 38B	0.418757	0.00827178
ZFYVE26	23503	zinc finger FYVE-type containing 26	-0.555642	0.0082746
ACTR10	55860	actin related protein 10	-0.846005	0.00832559
RABEPK	10244	Rab9 effector protein with kelch motifs	0.338687	0.00833803
RAB43	339122	RAB43, member RAS oncogene family	-0.752336	0.00834632
PSMD14	10213	proteasome 26S subunit, non-ATPase 14	0.317589	0.00834672
ITGB5	3693	integrin subunit beta 5	-0.508403	0.00835006
SDC4	6385	syndecan 4	0.365331	0.00846095
JAG1	182	jagged canonical Notch ligand 1	-0.861418	0.00846223
RUSC2	9853	RUN and SH3 domain containing 2	-0.722883	0.00847474
DGCR8	54487	DGCR8 microprocessor complex subunit	-0.366155	0.00847837
SLC25A13	10165	solute carrier family 25 member 13	-0.45104	0.00848465
PIGM	93183	phosphatidylinositol glycan anchor biosynthesis class M	-0.687226	0.00854688
HLA-C	3107	major histocompatibility complex, class I, C	0.37469	0.00854877
ST8SIA4	7903	ST8 alpha-N-acetyl-neuraminide alpha-2,8-sialyltransferase 4	-0.774255	0.00856531
DIAPH2	1730	diaphanous related formin 2	-0.47802	0.00858073
ZSCAN31	64288	zinc finger and SCAN domain containing 31	-1.04225	0.00860942
SRSF1	6426	serine and arginine rich splicing factor 1	0.400601	0.00864899
RWDD2A	112611	RWD domain containing 2A	-1.14551	0.00865108
HDAC8	55869	histone deacetylase 8	-0.822367	0.00866786
SEC14L1	6397	SEC14 like lipid binding 1	-0.433021	0.0086713
C3orf14	57415	chromosome 3 open reading frame 14	0.38563	0.00868627
CEP170	9859	centrosomal protein 170	-0.550403	0.00876091
SNHG19	100507303	small nucleolar RNA host gene 19	0.519176	0.00878011
RPS4X	6191	ribosomal protein S4 X-linked	0.450462	0.00881122
TRAF3	7187	TNF receptor associated factor 3	0.335591	0.00884843
RNF146	81847	ring finger protein 146	-0.899546	0.00885888
RPS5	6193	ribosomal protein S5	0.451531	0.00886016
STOM	2040	stomatin	-0.301488	0.00886514
TAX1BP3	30851	Tax1 binding protein 3	-0.904376	0.00888115
AP3S1	1176	adaptor related protein complex 3 subunit sigma 1	-0.529702	0.00888673
CDC25A	993	cell division cycle 25A	0.419629	0.00889055
GTPBP2	54676	GTP binding protein 2	-0.794429	0.00891877
KCTD21	283219	potassium channel tetramerization domain containing 21	-0.823719	0.0089882
MFSD14B	84641	major facilitator superfamily domain containing 14B	-0.419208	0.00902004
SLC9B2	133308	solute carrier family 9 member B2	-0.372115	0.00902321
GEMIN5	25929	gem nuclear organelle associated protein 5	-0.406703	0.00905179
ATMIN	23300	ATM interactor	-0.542557	0.00905858
MBOAT2	129642	membrane bound O-acyltransferase domain containing 2	-0.824572	0.00906064
CENPV	201161	centromere protein V	0.334145	0.0090977
LACTB	114294	lactamase beta	-0.769439	0.00911862
DNAJC1	64215	DnaJ heat shock protein family (Hsp40) member C1	0.335811	0.00919658
YBX3	8531	Y-box binding protein 3	0.348953	0.00922373
MICALL1	85377	MICAL like 1	-0.307313	0.00923306
OLA1	29789	Obg like ATPase 1	0.413631	0.00930501
SMIM29	221491	small integral membrane protein 29	-1.25608	0.00934523
TGOLN2	10618	trans-golgi network protein 2	-0.350456	0.00936285
IKBKE	9641	inhibitor of nuclear factor kappa B kinase subunit epsilon	-1.6434	0.00937422
BMP6	654	bone morphogenetic protein 6	-0.266403	0.00939342
SNRPF	6636	small nuclear ribonucleoprotein polypeptide F	0.418366	0.00940691
SPRY2	10253	sprouty RTK signaling antagonist 2	-0.728967	0.00942497
AP1S1	1174	adaptor related protein complex 1 subunit sigma 1	-0.77643	0.00943292
ANKMY1	51281	ankyrin repeat and MYND domain containing 1	-0.763664	0.0094447
TMEM161A	54929	transmembrane protein 161A	0.439036	0.00948981
ABHD16A	7920	abhydrolase domain containing 16A	-0.679499	0.00953999
TMEM234	56063	transmembrane protein 234	-1.46945	0.00958439
NBEAL1	65065	neurobeachin like 1	-1.32856	0.0095885
RAB29	8934	RAB29, member RAS oncogene family	-0.43085	0.00959233
DBT	1629	dihydrolipoamide branched chain transacylase E2	-0.959308	0.00961266
REXO2	25996	RNA exonuclease 2	-0.581559	0.00966048
IARS2	55699	isoleucyl-tRNA synthetase 2, mitochondrial	-0.385164	0.00971709
SLC30A5	64924	solute carrier family 30 member 5	-0.478215	0.00972664
DNAJC5	80331	DnaJ heat shock protein family (Hsp40) member C5	-0.318043	0.00973347
CTC1	80169	CST telomere replication complex component 1	-1.12956	0.00975072
DERL1	79139	derlin 1	0.294522	0.00975161
PTPRG	5793	protein tyrosine phosphatase receptor type G	-0.434797	0.00976447
DYSF	8291	dysferlin	-0.614274	0.00982453
DHX9	1660	DExH-box helicase 9	0.299434	0.00987805
LRIG3	121227	leucine rich repeats and immunoglobulin like domains 3	0.418823	0.00988218
ABLIM3	22885	actin binding LIM protein family member 3	-0.584759	0.00988506
FLNB	2317	filamin B	-0.464841	0.00988811
RN7SK	125050	RNA component of 7SK nuclear ribonucleoprotein	0.852679	0.00992277
ENTPD7	57089	ectonucleoside triphosphate diphosphohydrolase 7	-0.546485	0.00992927
TET2	54790	tet methylcytosine dioxygenase 2	-0.968519	0.00993947
ATP6V1G2-DDX39B	100532737	ATP6V1G2-DDX39B readthrough (NMD candidate)	0.82671	0.00994654
C20orf194	25943	chromosome 20 open reading frame 194	-0.702149	0.00995552
SCFD2	152579	sec1 family domain containing 2	0.395501	0.0100253
L3HYPDH	112849	trans-L-3-hydroxyproline dehydratase	-0.886662	0.0100358
CDCP1	64866	CUB domain containing protein 1	0.527201	0.0100624
TCTA	6988	T cell leukemia translocation altered	-0.610139	0.0100797
FAM171A1	221061	family with sequence similarity 171 member A1	-0.456242	0.0101116
CHST3	9469	carbohydrate sulfotransferase 3	-0.665185	0.0101359
RRM2	6241	ribonucleotide reductase regulatory subunit M2	0.5685	0.0101559
SUN2	25777	Sad1 and UNC84 domain containing 2	-0.313517	0.0101577
ELMO2	63916	engulfment and cell motility 2	-0.717114	0.0101633
RAI14	26064	retinoic acid induced 14	-0.437118	0.0101817
EDEM1	9695	ER degradation enhancing alpha-mannosidase like protein 1	-0.61411	0.0101922
DNAJC13	23317	DnaJ heat shock protein family (Hsp40) member C13	-0.548207	0.010264
CRYZ	1429	crystallin zeta	-0.725978	0.01035
PLIN3	10226	perilipin 3	-0.56244	0.0103749
ANKRD50	57182	ankyrin repeat domain 50	-0.443207	0.0103807
PRPS1	5631	phosphoribosyl pyrophosphate synthetase 1	0.303662	0.0103811
PSMC3IP	29893	PSMC3 interacting protein	0.59867	0.0103868
UNC45A	55898	unc-45 myosin chaperone A	-0.484106	0.0103892
ERLIN1	10613	ER lipid raft associated 1	0.329953	0.0103961
MAN2B1	4125	mannosidase alpha class 2B member 1	0.361876	0.0104131
CFLAR	8837	CASP8 and FADD like apoptosis regulator	-0.732696	0.0104818
DDX23	9416	DEAD-box helicase 23	-0.32184	0.010484
SLC10A3	8273	solute carrier family 10 member 3	-0.348245	0.0104913
MLLT1	4298	MLLT1 super elongation complex subunit	-0.488106	0.0105337
PRNP	5621	prion protein	-0.392551	0.0105489
CCN1	3491	cellular communication network factor 1	-0.428009	0.0105629
SSR1	6745	signal sequence receptor subunit 1	-0.441666	0.0105939
NOVA1	4857	NOVA alternative splicing regulator 1	-1.17745	0.0106158
SOX17	64321	SRY-box transcription factor 17	-0.649446	0.0106203
ATR	545	ATR serine/threonine kinase	-0.802358	0.0106785
LSM3	27258	LSM3 homolog, U6 small nuclear RNA and mRNA degradation associated	0.369186	0.0106951
RAB23	51715	RAB23, member RAS oncogene family	-0.49118	0.0107063
C15orf40	123207	chromosome 15 open reading frame 40	-0.716492	0.0107256
PTX3	5806	pentraxin 3	-0.387153	0.0107471
VASH1	22846	vasohibin 1	-0.500741	0.0107489
HOXB4	3214	homeobox B4	-0.851029	0.0107618
LSM8	51691	LSM8 homolog, U6 small nuclear RNA associated	-0.777096	0.0107624
EFCAB12	90288	EF-hand calcium binding domain 12	1.83325	0.0107825
RNASE1	6035	ribonuclease A family member 1, pancreatic	-0.613836	0.0107833
TMBIM4	51643	transmembrane BAX inhibitor motif containing 4	-0.544351	0.0107853
DUT	1854	deoxyuridine triphosphatase	0.382978	0.0108004
YRDC	79693	yrdC N6-threonylcarbamoyltransferase domain containing	0.299573	0.0108233
SGPP1	81537	sphingosine-1-phosphate phosphatase 1	-0.590466	0.0108329
CAVIN1	284119	caveolae associated protein 1	-0.617824	0.0108573
ITPRIPL2	162073	ITPRIP like 2	-0.467384	0.0108714
IL12A	3592	interleukin 12A	0.923507	0.0109074
NHSL1	57224	NHS like 1	-1.04297	0.0109371
DBNDD2	55861	dysbindin domain containing 2	0.442946	0.010939
RDH11	51109	retinol dehydrogenase 11	-0.50938	0.0111262
ADD1	118	adducin 1	-0.397236	0.0111363
SUPT3H	8464	SPT3 homolog, SAGA and STAGA complex component	0.588048	0.0111634
SEC23IP	11196	SEC23 interacting protein	-0.571994	0.0111985
WWC1	23286	WW and C2 domain containing 1	0.905023	0.0112012
ACTR2	10097	actin related protein 2	-0.644391	0.0112014
RPL24	6152	ribosomal protein L24	0.420602	0.011226
BCL3	602	BCL3 transcription coactivator	-1.01074	0.0112406
FDPS	2224	farnesyl diphosphate synthase	-0.623981	0.0112541
RANBP1	5902	RAN binding protein 1	0.462217	0.0112641
ZSWIM5	57643	zinc finger SWIM-type containing 5	-1.65765	0.0112729
MSANTD3	91283	Myb/SANT DNA binding domain containing 3	-0.481522	0.0112988
TAOK1	57551	TAO kinase 1	-0.465623	0.0113021
RAB40C	57799	RAB40C, member RAS oncogene family	-0.711552	0.0113873
CHMP6	79643	charged multivesicular body protein 6	-0.784344	0.0114065
STXBP5	134957	syntaxin binding protein 5	-0.582765	0.0114274
AFAP1L1	134265	actin filament associated protein 1 like 1	-0.587365	0.0114431
SEPTIN6	23157	septin 6	-0.651647	0.0114446
RIPOR1	79567	RHO family interacting cell polarization regulator 1	-0.387916	0.0115047
UBB	7314	ubiquitin B	0.562844	0.0115075
PPP2R5D	5528	protein phosphatase 2 regulatory subunit B'delta	-0.459958	0.0115278
GCLM	2730	glutamate-cysteine ligase modifier subunit	-0.705759	0.01154
SMIM12	113444	small integral membrane protein 12	-0.49648	0.0115571
FAU	2197	FAU ubiquitin like and ribosomal protein S30 fusion	0.460868	0.0115967
USE1	55850	unconventional SNARE in the ER 1	0.568073	0.011637
SPTLC2	9517	serine palmitoyltransferase long chain base subunit 2	-0.42429	0.0116699
UBC	7316	ubiquitin C	0.43736	0.0117489
PRUNE2	158471	prune homolog 2 with BCH domain	-1.35175	0.0117807
DYM	54808	dymeclin	0.31763	0.0118119
PRDM15	63977	PR/SET domain 15	-0.960553	0.0118651
SERINC5	256987	serine incorporator 5	-0.630071	0.0118769
TRMT1L	81627	tRNA methyltransferase 1 like	-0.871044	0.0118772
LMNA	4000	lamin A/C	-0.760439	0.0118786
EPN2	22905	epsin 2	-0.654376	0.011886
ANXA6	309	annexin A6	-0.841248	0.0118865
MTRF1	9617	mitochondrial translation release factor 1	0.524974	0.0119168
ALDH1L2	160428	aldehyde dehydrogenase 1 family member L2	-1.10294	0.0119932
TF	7018	transferrin	0.59072	0.0120396
CEP120	153241	centrosomal protein 120	-0.758499	0.0120867
DCAF6	55827	DDB1 and CUL4 associated factor 6	-0.429337	0.0120973
ITGB1	3688	integrin subunit beta 1	-0.308966	0.0121542
PIK3C2A	5286	phosphatidylinositol-4-phosphate 3-kinase catalytic subunit type 2 alpha	-0.514384	0.0122361
CYBC1	79415	cytochrome b-245 chaperone 1	-0.704049	0.0122688
SMPD1	6609	sphingomyelin phosphodiesterase 1	-0.396062	0.0122972
ANXA1	301	annexin A1	-0.540867	0.0123056
POLD4	57804	DNA polymerase delta 4, accessory subunit	-0.875695	0.0123086
MAP2	4133	microtubule associated protein 2	-0.578331	0.0123118
ASPRV1	151516	aspartic peptidase retroviral like 1	1.3637	0.012343
JKAMP	51528	JNK1/MAPK8 associated membrane protein	-0.670165	0.0123543
LPCAT2	54947	lysophosphatidylcholine acyltransferase 2	-0.526501	0.0123675
ABCF3	55324	ATP binding cassette subfamily F member 3	-0.459519	0.0124215
KAT7	11143	lysine acetyltransferase 7	-0.523362	0.0124431
KLF3	51274	Kruppel like factor 3	-0.42364	0.0125016
HOMER3	9454	homer scaffold protein 3	-0.437378	0.0125323
LEPROTL1	23484	leptin receptor overlapping transcript like 1	-0.557477	0.012552
NAP1L5	266812	nucleosome assembly protein 1 like 5	-0.509991	0.0126047
HNRNPF	3185	heterogeneous nuclear ribonucleoprotein F	0.309064	0.0126521
SHISA2	387914	shisa family member 2	-0.903979	0.0126522
RFXANK	8625	regulatory factor X associated ankyrin containing protein	-0.780202	0.0126923
DCTN5	84516	dynactin subunit 5	-0.383506	0.0126952
BBS7	55212	Bardet-Biedl syndrome 7	-0.77533	0.0127541
MRRF	92399	mitochondrial ribosome recycling factor	0.340592	0.0127557
TXNDC9	10190	thioredoxin domain containing 9	-0.572202	0.0127757
RPS24	6229	ribosomal protein S24	0.430224	0.0127849
GYS1	2997	glycogen synthase 1	-0.843607	0.0128004
U2AF1	7307	U2 small nuclear RNA auxiliary factor 1	0.630421	0.0128872
CMSS1	84319	cms1 ribosomal small subunit homolog	0.30945	0.0128873
DTWD2	285605	DTW domain containing 2	-0.883116	0.0129707
ABCC4	10257	ATP binding cassette subfamily C member 4	-0.358064	0.0129787
PLPP4	196051	phospholipid phosphatase 4	-0.639098	0.0129849
SOS1	6654	SOS Ras/Rac guanine nucleotide exchange factor 1	-0.644659	0.0130066
METAP2	10988	methionyl aminopeptidase 2	0.311641	0.0130443
GRK5	2869	G protein-coupled receptor kinase 5	-0.585213	0.0131095
CHD4	1108	chromodomain helicase DNA binding protein 4	-0.377326	0.0131127
SEPTIN8	23176	septin 8	-0.464729	0.0131594
CROT	54677	carnitine O-octanoyltransferase	-0.826159	0.0131818
ITSN1	6453	intersectin 1	-0.442318	0.0132256
LRRFIP1	9208	LRR binding FLII interacting protein 1	-0.340906	0.0132814
ZNF516	9658	zinc finger protein 516	-1.39828	0.013287
PIGH	5283	phosphatidylinositol glycan anchor biosynthesis class H	0.358484	0.0133526
NENF	29937	neudesin neurotrophic factor	0.315579	0.0133603
IBTK	25998	inhibitor of Bruton tyrosine kinase	-0.508381	0.013375
C7orf31	136895	chromosome 7 open reading frame 31	1.36437	0.0133868
SF3B4	10262	splicing factor 3b subunit 4	0.406895	0.0134231
MMP2	4313	matrix metallopeptidase 2	-0.336486	0.0134279
ANKS4B	257629	ankyrin repeat and sterile alpha motif domain containing 4B	0.919833	0.0134362
COPS2	9318	COP9 signalosome subunit 2	0.340356	0.0134377
RPL35P2	646766	ribosomal protein L35 pseudogene 2	1.26005	0.0134664
SIDT2	51092	SID1 transmembrane family member 2	-0.594875	0.0135138
CD320	51293	CD320 molecule	0.333601	0.0135282
WDR13	64743	WD repeat domain 13	-0.784703	0.013534
CHURC1	91612	churchill domain containing 1	-0.698301	0.0135693
PARD3	56288	par-3 family cell polarity regulator	0.341987	0.0135818
NAGK	55577	N-acetylglucosamine kinase	-0.334077	0.0136557
YWHAZ	7534	tyrosine 3-monooxygenase/tryptophan 5-monooxygenase activation protein zeta	-0.328456	0.0137098
ZDHHC18	84243	zinc finger DHHC-type containing 18	0.313993	0.0137251
GORASP1	64689	golgi reassembly stacking protein 1	-0.435273	0.0137395
EIF1AX	1964	eukaryotic translation initiation factor 1A X-linked	0.350109	0.0137404
TMEM33	55161	transmembrane protein 33	0.30073	0.0137626
PRR34-AS1	150381	PRR34 antisense RNA 1	-1.23109	0.0138308
RHOB	388	ras homolog family member B	-0.508834	0.0138511
ACLY	47	ATP citrate lyase	-0.354044	0.0138769
AFAP1	60312	actin filament associated protein 1	-0.375003	0.0138972
SLC35F6	54978	solute carrier family 35 member F6	-0.483638	0.0139018
TMEM127	55654	transmembrane protein 127	-0.452091	0.013931
DDB1	1642	damage specific DNA binding protein 1	0.253226	0.0139339
PDHB	5162	pyruvate dehydrogenase E1 beta subunit	-0.691315	0.0139714
CDH4	1002	cadherin 4	0.682356	0.0139741
MCM2	4171	minichromosome maintenance complex component 2	0.3096	0.0139867
INTS5	80789	integrator complex subunit 5	-0.587759	0.0139979
MON1B	22879	MON1 homolog B, secretory trafficking associated	-0.395821	0.0140001
MPV17L2	84769	MPV17 mitochondrial inner membrane protein like 2	-0.593483	0.0140213
BTBD1	53339	BTB domain containing 1	-0.351114	0.0140562
PI4K2B	55300	phosphatidylinositol 4-kinase type 2 beta	-0.397832	0.0140803
BCL9L	283149	BCL9 like	-0.899525	0.0140812
LRRC45	201255	leucine rich repeat containing 45	-0.963794	0.0141392
FBXO9	26268	F-box protein 9	-0.766449	0.0141817
ARID2	196528	AT-rich interaction domain 2	-0.592591	0.0142023
PDCD1LG2	80380	programmed cell death 1 ligand 2	-1.28663	0.0142149
BSG	682	basigin (Ok blood group)	0.294048	0.0142364
UQCC1	55245	ubiquinol-cytochrome c reductase complex assembly factor 1	0.387155	0.0142618
VCL	7414	vinculin	-0.476765	0.0143072
GAS5	60674	growth arrest specific 5	0.550355	0.014309
CAMLG	819	calcium modulating ligand	0.311209	0.0143109
MTUS1	57509	microtubule associated scaffold protein 1	0.512151	0.0143328
PPP3CB	5532	protein phosphatase 3 catalytic subunit beta	-0.508523	0.0143421
IMPACT	55364	impact RWD domain protein	-0.682191	0.0143495
RHOC	389	ras homolog family member C	-0.659971	0.0143963
SOD2	6648	superoxide dismutase 2	0.319064	0.0144059
STX6	10228	syntaxin 6	-0.385515	0.0144177
NEK1	4750	NIMA related kinase 1	-0.5614	0.0144629
EXOC6	54536	exocyst complex component 6	-0.413164	0.0144962
NRN1	51299	neuritin 1	-0.460992	0.0145027
CAPN7	23473	calpain 7	-0.503425	0.0145422
SLC39A14	23516	solute carrier family 39 member 14	-0.458491	0.0146334
ZNF185	7739	zinc finger protein 185 with LIM domain	-0.650485	0.0146414
SSRP1	6749	structure specific recognition protein 1	0.335926	0.0146879
RTN4	57142	reticulon 4	-0.273874	0.0147497
H6PD	9563	hexose-6-phosphate dehydrogenase/glucose 1-dehydrogenase	-0.45487	0.0147609
MDFI	4188	MyoD family inhibitor	-0.492565	0.0147623
VPS13B	157680	vacuolar protein sorting 13 homolog B	-1.13528	0.0147978
ZYG11B	79699	zyg-11 family member B, cell cycle regulator	-0.497773	0.0148317
EMC1-AS1	101927895	EMC1 antisense RNA 1	0.622289	0.0148339
NOG	9241	noggin	-1.36362	0.0148528
CCN2	1490	cellular communication network factor 2	-0.775362	0.0148734
KLF2	10365	Kruppel like factor 2	-0.63081	0.0148793
SULT1C2	6819	sulfotransferase family 1C member 2	1.14742	0.0149523
RPS15A	6210	ribosomal protein S15a	0.419369	0.0149587
FEN1	2237	flap structure-specific endonuclease 1	0.268807	0.0150036
SHROOM4	57477	shroom family member 4	-0.706607	0.0150205
MKLN1	4289	muskelin 1	-0.513907	0.0150527
EEF1G	1937	eukaryotic translation elongation factor 1 gamma	0.456811	0.0150764
OSER1	51526	oxidative stress responsive serine rich 1	0.373571	0.0150912
WDR61	80349	WD repeat domain 61	-0.653206	0.015107
DTX3	196403	deltex E3 ubiquitin ligase 3	-0.707397	0.0151488
LRP11	84918	LDL receptor related protein 11	-0.384707	0.0151927
GET1	7485	guided entry of tail-anchored proteins factor 1	-0.576061	0.0152151
SCX	642658	scleraxis bHLH transcription factor	-0.499812	0.0152239
SLITRK4	139065	SLIT and NTRK like family member 4	-1.14532	0.0152674
GATAD1	57798	GATA zinc finger domain containing 1	-0.395764	0.0152982
CXCL12	6387	C-X-C motif chemokine ligand 12	-1.40612	0.0153196
B4GALNT4	338707	beta-1,4-N-acetyl-galactosaminyltransferase 4	0.795624	0.0153972
SLC25A40	55972	solute carrier family 25 member 40	-0.643307	0.0155196
BIVM	54841	basic, immunoglobulin-like variable motif containing	-0.730087	0.0155198
DOK4	55715	docking protein 4	-0.569198	0.0155859
RAB11A	8766	RAB11A, member RAS oncogene family	-0.401083	0.0156024
HMGB1	3146	high mobility group box 1	0.329697	0.0156845
TCEAL9	51186	transcription elongation factor A like 9	-0.345525	0.0157284
EIF4B	1975	eukaryotic translation initiation factor 4B	0.265403	0.0157633
RPL26	6154	ribosomal protein L26	0.47718	0.0158187
SH3KBP1	30011	SH3 domain containing kinase binding protein 1	-0.403542	0.0158505
TWSG1	57045	twisted gastrulation BMP signaling modulator 1	0.278205	0.0159411
RNPEPL1	57140	arginyl aminopeptidase like 1	-0.566973	0.016017
GIPC1	10755	GIPC PDZ domain containing family member 1	-0.414271	0.0160718
KCTD20	222658	potassium channel tetramerization domain containing 20	-0.389434	0.016104
PTPN12	5782	protein tyrosine phosphatase non-receptor type 12	-0.509025	0.0161074
SDHC	6391	succinate dehydrogenase complex subunit C	-0.407719	0.0161402
VLDLR-AS1	401491	VLDLR antisense RNA 1	-1.36112	0.0162286
MAPK6	5597	mitogen-activated protein kinase 6	-0.362068	0.0162395
AQP3	360	aquaporin 3 (Gill blood group)	0.823844	0.0162579
B2M	567	beta-2-microglobulin	0.359858	0.0162672
SEC14L1P1	729799	SEC14 like 1 pseudogene 1	0.965799	0.0163341
ATP11A	23250	ATPase phospholipid transporting 11A	-0.373474	0.0163691
USP28	57646	ubiquitin specific peptidase 28	0.370877	0.0163879
NME2	4831	NME/NM23 nucleoside diphosphate kinase 2	0.321231	0.0164369
KIAA1143	57456	KIAA1143	-0.819186	0.0164931
UTP4	84916	UTP4 small subunit processome component	0.345073	0.0164936
SLC30A9	10463	solute carrier family 30 member 9	-0.489019	0.0165007
MYRIP	25924	myosin VIIA and Rab interacting protein	1.95512	0.0165163
BLOC1S4	55330	biogenesis of lysosomal organelles complex 1 subunit 4	-0.567898	0.0165319
LAT2	7462	linker for activation of T cells family member 2	1.1175	0.0165434
CNBP	7555	CCHC-type zinc finger nucleic acid binding protein	0.283885	0.0165649
PIAS3	10401	protein inhibitor of activated STAT 3	-0.482955	0.0165704
VPS37B	79720	VPS37B subunit of ESCRT-I	0.29054	0.0165764
CPT1A	1374	carnitine palmitoyltransferase 1A	-0.290772	0.0166008
PCNX4	64430	pecanex 4	-0.832224	0.0166545
ISYNA1	51477	inositol-3-phosphate synthase 1	0.354465	0.0166609
SLC38A10	124565	solute carrier family 38 member 10	-0.326979	0.0167572
UBE2B	7320	ubiquitin conjugating enzyme E2 B	-0.413388	0.0168093
SSBP2	23635	single stranded DNA binding protein 2	-0.545222	0.0168199
MON2	23041	MON2 homolog, regulator of endosome-to-Golgi trafficking	-0.542404	0.0168392
KRT18P17	344866	keratin 18 pseudogene 17	1.43228	0.0168951
PRMT2	3275	protein arginine methyltransferase 2	-0.528353	0.0169083
ILF2	3608	interleukin enhancer binding factor 2	0.311732	0.0169181
TAGLN	6876	transgelin	-1.17913	0.0169311
UNK	85451	unk zinc finger	-0.765495	0.0169498
DUSP18	150290	dual specificity phosphatase 18	-1.11754	0.0170047
LDLRAP1	26119	low density lipoprotein receptor adaptor protein 1	-0.558194	0.0170067
GCNA	93953	germ cell nuclear acidic peptidase	0.607626	0.0170231
PCBP2	5094	poly(rC) binding protein 2	0.284961	0.0170424
GNG10	2790	G protein subunit gamma 10	-0.425194	0.0170719
KDM4A	9682	lysine demethylase 4A	-0.537325	0.0170761
YWHAE	7531	tyrosine 3-monooxygenase/tryptophan 5-monooxygenase activation protein epsilon	0.343692	0.0171133
SNX16	64089	sorting nexin 16	0.410284	0.0171806
SLC35G2	80723	solute carrier family 35 member G2	-0.503471	0.0172576
RPL3	6122	ribosomal protein L3	0.46361	0.017306
SNHG17	388796	small nucleolar RNA host gene 17	0.386133	0.0173103
TTC5	91875	tetratricopeptide repeat domain 5	-0.972647	0.0173573
MPRIP	23164	myosin phosphatase Rho interacting protein	-0.317446	0.0173624
LRRFIP1P1	101290506	LRR binding FLII interacting protein 1 pseudogene 1	1.38422	0.017387
RPF1	80135	ribosome production factor 1 homolog	0.330407	0.0173986
EIF3L	51386	eukaryotic translation initiation factor 3 subunit L	0.309095	0.0174082
EIF3D	8664	eukaryotic translation initiation factor 3 subunit D	0.284928	0.0174765
PPP2R2A	5520	protein phosphatase 2 regulatory subunit Balpha	0.364796	0.0175195
TPM4	7171	tropomyosin 4	-0.631106	0.0175416
PPP1R15A	23645	protein phosphatase 1 regulatory subunit 15A	0.390538	0.017546
IL15RA	3601	interleukin 15 receptor subunit alpha	-0.529234	0.0176436
DLAT	1737	dihydrolipoamide S-acetyltransferase	-0.327977	0.0176499
CERS5	91012	ceramide synthase 5	-0.341236	0.0176626
ITGA10	8515	integrin subunit alpha 10	0.460892	0.0176702
EIF4A1	1973	eukaryotic translation initiation factor 4A1	0.359886	0.017702
SEC24D	9871	SEC24 homolog D, COPII coat complex component	-0.31848	0.017816
SMC2	10592	structural maintenance of chromosomes 2	0.353016	0.0179535
MIR3945HG	731424	MIR3945 host gene	0.962457	0.017956
RPS17	6218	ribosomal protein S17	0.41043	0.0179612
AKAP17A	8227	A-kinase anchoring protein 17A	0.319842	0.0180082
TGFB1I1	7041	transforming growth factor beta 1 induced transcript 1	-0.668691	0.0180132
EIF2A	83939	eukaryotic translation initiation factor 2A	0.3177	0.018015
RPS2P5	100130562	ribosomal protein S2 pseudogene 5	0.404133	0.0181246
TYMS	7298	thymidylate synthetase	0.367611	0.018175
SLC4A2	6522	solute carrier family 4 member 2	-0.399892	0.0181896
ECM1	1893	extracellular matrix protein 1	0.481306	0.018213
PCDH7	5099	protocadherin 7	-0.607759	0.018304
GTF3C2	2976	general transcription factor IIIC subunit 2	-0.409574	0.0183712
ZNF699	374879	zinc finger protein 699	-1.34591	0.0183991
TP53INP2	58476	tumor protein p53 inducible nuclear protein 2	-0.837323	0.0184145
ERBIN	55914	erbb2 interacting protein	-0.488396	0.018438
ZBTB38	253461	zinc finger and BTB domain containing 38	-0.750793	0.0184399
TBCA	6902	tubulin folding cofactor A	0.298017	0.0184744
PA2G4	5036	proliferation-associated 2G4	0.287753	0.0185121
AMIGO2	347902	adhesion molecule with Ig like domain 2	-0.867182	0.0185229
PSMG4	389362	proteasome assembly chaperone 4	-0.513459	0.0185942
SASH1	23328	SAM and SH3 domain containing 1	-0.59148	0.0186652
ARHGAP45	23526	Rho GTPase activating protein 45	0.483419	0.0187135
TAOK2	9344	TAO kinase 2	-0.477428	0.0187298
FAF1	11124	Fas associated factor 1	0.35564	0.0187355
CCND1	595	cyclin D1	-0.348813	0.0187843
DDX17	10521	DEAD-box helicase 17	-0.416874	0.0188668
ACP6	51205	acid phosphatase 6, lysophosphatidic	-1.62833	0.0190868
RPS15	6209	ribosomal protein S15	0.394879	0.0191105
TMEM147	10430	transmembrane protein 147	0.295189	0.0191481
KLF10	7071	Kruppel like factor 10	-0.543124	0.0192124
BTG3	10950	BTG anti-proliferation factor 3	0.402905	0.0192327
EIF3A	8661	eukaryotic translation initiation factor 3 subunit A	0.254338	0.0192923
AFMID	125061	arylformamidase	0.356304	0.0192945
NPHP4	261734	nephrocystin 4	-0.626639	0.0193023
EFNB2	1948	ephrin B2	-0.666358	0.0193073
ANKRD1	27063	ankyrin repeat domain 1	-0.426821	0.0193438
RGS4	5999	regulator of G protein signaling 4	-0.696927	0.0193703
SRRT	51593	serrate, RNA effector molecule	0.293792	0.0194183
ZC3H15	55854	zinc finger CCCH-type containing 15	0.250587	0.0194327
UAP1	6675	UDP-N-acetylglucosamine pyrophosphorylase 1	-0.343586	0.0194805
PMEPA1	56937	prostate transmembrane protein, androgen induced 1	-0.635037	0.0195302
SLC22A5	6584	solute carrier family 22 member 5	-0.901084	0.0195973
MAP1LC3A	84557	microtubule associated protein 1 light chain 3 alpha	0.345713	0.0196413
TK1	7083	thymidine kinase 1	0.337668	0.0196447
CSRP1	1465	cysteine and glycine rich protein 1	-0.722705	0.0197464
INPP4A	3631	inositol polyphosphate-4-phosphatase type I A	-0.487419	0.019813
GPHN	10243	gephyrin	0.513283	0.0198573
AATF	26574	apoptosis antagonizing transcription factor	0.283531	0.0199178
KHSRP	8570	KH-type splicing regulatory protein	0.28289	0.0199645
EFCAB14	9813	EF-hand calcium binding domain 14	-0.37765	0.0199845
NUDCD2	134492	NudC domain containing 2	-0.984393	0.020004
NPR1	4881	natriuretic peptide receptor 1	-0.746758	0.0200364
CARNMT1	138199	carnosine N-methyltransferase 1	-0.781374	0.0201116
GBGT1	26301	globoside alpha-1,3-N-acetylgalactosaminyltransferase 1 (FORS blood group)	-0.721423	0.0201198
STX2	2054	syntaxin 2	-0.744423	0.0201426
CPTP	80772	ceramide-1-phosphate transfer protein	-0.52608	0.0201557
RPGR	6103	retinitis pigmentosa GTPase regulator	0.556722	0.0201728
PTER	9317	phosphotriesterase related	0.532702	0.0202321
KLF6	1316	Kruppel like factor 6	-0.833308	0.0202349
ENY2	56943	ENY2 transcription and export complex 2 subunit	0.292585	0.0202549
DGLUCY	80017	D-glutamate cyclase	-0.740572	0.0203062
CTNS	1497	cystinosin, lysosomal cystine transporter	-0.490694	0.0203099
FERMT3	83706	fermitin family member 3	-0.709533	0.0203372
ZFYVE21	79038	zinc finger FYVE-type containing 21	-0.521689	0.0203861
STXBP2	6813	syntaxin binding protein 2	-0.433202	0.0203891
GCSH	2653	glycine cleavage system protein H	-0.396863	0.0203997
TXNRD1	7296	thioredoxin reductase 1	-0.330808	0.0205301
GBA2	57704	glucosylceramidase beta 2	-0.603924	0.0205539
ARMCX3	51566	armadillo repeat containing X-linked 3	-0.485101	0.0206323
ATG9A	79065	autophagy related 9A	-0.259137	0.0206556
OSTF1	26578	osteoclast stimulating factor 1	-0.55926	0.0206904
ARHGEF37	389337	Rho guanine nucleotide exchange factor 37	-1.09436	0.020712
ZNF480	147657	zinc finger protein 480	-0.936135	0.0207241
TMEM65	157378	transmembrane protein 65	-0.428376	0.020756
BMP2	650	bone morphogenetic protein 2	-0.560832	0.0207581
NARF	26502	nuclear prelamin A recognition factor	-0.329843	0.0207735
GIMAP4	55303	GTPase, IMAP family member 4	-1.17634	0.020838
KDM4B	23030	lysine demethylase 4B	-0.834521	0.0208462
HOMEZ	57594	homeobox and leucine zipper encoding	-1.01369	0.0208712
RMDN1	51115	regulator of microtubule dynamics 1	-0.6392	0.0208881
TRIM16L	147166	tripartite motif containing 16 like	-0.969179	0.0209469
EID1	23741	EP300 interacting inhibitor of differentiation 1	-0.451397	0.0209494
APEH	327	acylaminoacyl-peptide hydrolase	-0.89354	0.0209521
DGCR11	25786	DiGeorge syndrome critical region gene 11	-1.12644	0.0209614
TBC1D10A	83874	TBC1 domain family member 10A	-0.915693	0.0209799
CFL2	1073	cofilin 2	-0.681675	0.0210073
WASHC5	9897	WASH complex subunit 5	-0.462129	0.0210089
ARPC1A	10552	actin related protein 2/3 complex subunit 1A	-0.44097	0.021056
TRIP6	7205	thyroid hormone receptor interactor 6	-0.620491	0.0210599
CNTNAP1	8506	contactin associated protein 1	0.342807	0.0211009
IGFBP2	3485	insulin like growth factor binding protein 2	0.690997	0.0211023
GNL3L	54552	G protein nucleolar 3 like	-0.340113	0.0211198
ACTN1	87	actinin alpha 1	-0.591151	0.0211445
ZFP90	146198	ZFP90 zinc finger protein	-0.677129	0.0211739
COQ9	57017	coenzyme Q9	-0.429255	0.0212307
ATE1	11101	arginyltransferase 1	-0.474509	0.021243
PDLIM3	27295	PDZ and LIM domain 3	0.392451	0.0212454
GTPBP4	23560	GTP binding protein 4	0.301417	0.0212935
TWF2	11344	twinfilin actin binding protein 2	-0.631629	0.0213021
CDC25C	995	cell division cycle 25C	0.702537	0.0213052
ITSN2	50618	intersectin 2	-0.453994	0.02131
ROBO3	64221	roundabout guidance receptor 3	-0.844775	0.0213372
GPR153	387509	G protein-coupled receptor 153	0.62491	0.0214114
PHKA1	5255	phosphorylase kinase regulatory subunit alpha 1	0.377938	0.0214267
YBX1	4904	Y-box binding protein 1	0.326798	0.0214607
RNF121	55298	ring finger protein 121	-0.455312	0.0215424
ACSL4	2182	acyl-CoA synthetase long chain family member 4	-0.334446	0.0215562
KLHL4	56062	kelch like family member 4	0.725529	0.0215754
DBN1	1627	drebrin 1	-0.483006	0.0215761
SLC2A3	6515	solute carrier family 2 member 3	-0.782263	0.0215912
MAGT1	84061	magnesium transporter 1	-0.297358	0.0215932
TMEM179B	374395	transmembrane protein 179B	-0.49633	0.0216284
ZFP91	80829	ZFP91 zinc finger protein	-0.339545	0.0216375
NPIPB2	729978	nuclear pore complex interacting protein family member B2	1.43251	0.0217429
TPTEP2-CSNK1E	102800317	TPTEP2-CSNK1E readthrough	2.32562	0.0217854
ZYX	7791	zyxin	-0.48693	0.0218154
HSPA8	3312	heat shock protein family A (Hsp70) member 8	0.424056	0.0218186
SAMD9	54809	sterile alpha motif domain containing 9	-0.687655	0.0218849
HGH1	51236	HGH1 homolog	-0.448967	0.021903
NMRAL2P	344887	NmrA like redox sensor 2, pseudogene	-1.39914	0.0219044
ZNF706	51123	zinc finger protein 706	-0.368994	0.0219443
DSTN	11034	destrin, actin depolymerizing factor	-0.585536	0.0219592
RTL6	84247	retrotransposon Gag like 6	-0.7311	0.0220348
TOMM6	100188893	translocase of outer mitochondrial membrane 6	-0.34759	0.0220412
HEATR5B	54497	HEAT repeat containing 5B	-1.17412	0.0221015
NCAPG2	54892	non-SMC condensin II complex subunit G2	0.377111	0.0221862
C2CD3	26005	C2 domain containing 3 centriole elongation regulator	0.330182	0.0222073
GLRX	2745	glutaredoxin	-1.04875	0.0222234
TCP1	6950	t-complex 1	0.349061	0.0222554
ARHGAP29	9411	Rho GTPase activating protein 29	-0.478299	0.0222965
HERC4	26091	HECT and RLD domain containing E3 ubiquitin protein ligase 4	-0.397542	0.022341
LRRC32	2615	leucine rich repeat containing 32	-0.861437	0.022369
ANXA7	310	annexin A7	-0.54269	0.0223854
GNG4	2786	G protein subunit gamma 4	0.775771	0.0224965
TRAK2	66008	trafficking kinesin protein 2	-0.374983	0.0225612
EIF3F	8665	eukaryotic translation initiation factor 3 subunit F	0.40416	0.0225799
POLR3F	10621	RNA polymerase III subunit F	-0.528856	0.0226258
CKS1B	1163	CDC28 protein kinase regulatory subunit 1B	0.339049	0.0226392
EXOC7	23265	exocyst complex component 7	-0.625278	0.0226837
CMIP	80790	c-Maf inducing protein	-0.522203	0.0226966
H2BC12	85236	H2B clustered histone 12	0.319892	0.0227836
JAG2	3714	jagged canonical Notch ligand 2	-0.689911	0.0228001
SNHG32	50854	small nucleolar RNA host gene 32	0.462094	0.0228241
AMOTL2	51421	angiomotin like 2	-0.367678	0.0228518
HLA-B	3106	major histocompatibility complex, class I, B	0.457609	0.0228573
ELOF1	84337	elongation factor 1 homolog	0.300384	0.0228997
HLA-F	3134	major histocompatibility complex, class I, F	0.654423	0.0229427
TOP1MT	116447	DNA topoisomerase I mitochondrial	0.357805	0.0229441
SQLE	6713	squalene epoxidase	-0.376796	0.0230009
MAPK1	5594	mitogen-activated protein kinase 1	-0.345408	0.0230334
CELF2	10659	CUGBP Elav-like family member 2	-0.458724	0.0231284
SFT2D3	84826	SFT2 domain containing 3	-0.583088	0.0231582
UBE2N	7334	ubiquitin conjugating enzyme E2 N	0.302892	0.0231701
ABCB6	10058	ATP binding cassette subfamily B member 6 (Langereis blood group)	-0.66507	0.0231875
ALDH3B1	221	aldehyde dehydrogenase 3 family member B1	-1.05865	0.023216
TMEM189	387521	transmembrane protein 189	-0.562216	0.0232165
SERPINE2	5270	serpin family E member 2	-0.653923	0.0232188
OSBPL9	114883	oxysterol binding protein like 9	-0.336404	0.0232861
USF1	7391	upstream transcription factor 1	-0.597504	0.0233071
PNRC2	55629	proline rich nuclear receptor coactivator 2	-0.402871	0.0233189
EIF3E	3646	eukaryotic translation initiation factor 3 subunit E	0.389763	0.0233401
PSME3	10197	proteasome activator subunit 3	-0.282356	0.0233733
HMGA1	3159	high mobility group AT-hook 1	0.396518	0.0233846
ECSCR	641700	endothelial cell surface expressed chemotaxis and apoptosis regulator	-0.669892	0.023402
HINT1	3094	histidine triad nucleotide binding protein 1	0.292464	0.0234073
SMYD3	64754	SET and MYND domain containing 3	-0.725743	0.0234629
TBC1D4	9882	TBC1 domain family member 4	-0.325191	0.0234971
NRGN	4900	neurogranin	0.328778	0.0235431
OSTM1	28962	osteoclastogenesis associated transmembrane protein 1	-0.391997	0.0236353
NCOA1	8648	nuclear receptor coactivator 1	-0.419909	0.0236413
EIF1	10209	eukaryotic translation initiation factor 1	0.294971	0.0236521
SLC47A1	55244	solute carrier family 47 member 1	0.325173	0.0237864
SLC1A3	6507	solute carrier family 1 member 3	0.681965	0.023797
POLH	5429	DNA polymerase eta	-0.498972	0.023833
CDK5	1020	cyclin dependent kinase 5	-0.712466	0.0238582
EML1	2009	EMAP like 1	-0.46885	0.0239046
VPS13C	54832	vacuolar protein sorting 13 homolog C	-0.771001	0.023953
SNX8	29886	sorting nexin 8	-0.491424	0.0240181
INPP5D	3635	inositol polyphosphate-5-phosphatase D	-0.734132	0.0241038
CERK	64781	ceramide kinase	-0.454855	0.0241642
RAB28	9364	RAB28, member RAS oncogene family	-0.938256	0.0241765
NIPA1	123606	NIPA magnesium transporter 1	-0.440172	0.0242032
TSC22D2	9819	TSC22 domain family member 2	-0.565991	0.0242338
AP5B1	91056	adaptor related protein complex 5 subunit beta 1	-0.381068	0.0242828
FBL	2091	fibrillarin	0.338767	0.0243168
CAB39	51719	calcium binding protein 39	-0.386587	0.0243298
SYF2	25949	SYF2 pre-mRNA splicing factor	0.328071	0.0243728
TRIM38	10475	tripartite motif containing 38	-0.615259	0.0243997
PET117	100303755	PET117 cytochrome c oxidase chaperone	-0.989007	0.0244569
CCNYL1	151195	cyclin Y like 1	-0.373472	0.024463
VOPP1	81552	VOPP1 WW domain binding protein	-0.255631	0.0244993
TRAPPC8	22878	trafficking protein particle complex 8	-0.646099	0.024526
INPPL1	3636	inositol polyphosphate phosphatase like 1	-0.460265	0.0245744
LSM14A	26065	LSM14A mRNA processing body assembly factor	0.349281	0.0246219
IL17RA	23765	interleukin 17 receptor A	-0.440466	0.0246367
SERINC2	347735	serine incorporator 2	-0.349574	0.0246399
JPH1	56704	junctophilin 1	0.503753	0.0246811
MAFG-DT	92659	MAFG divergent transcript	-0.984195	0.0246911
RCL1	10171	RNA terminal phosphate cyclase like 1	0.292977	0.0247168
XRCC4	7518	X-ray repair cross complementing 4	0.434537	0.0247765
KDM1B	221656	lysine demethylase 1B	-0.503876	0.024789
CSMD1	64478	CUB and Sushi multiple domains 1	-1.48295	0.0247962
ASB7	140460	ankyrin repeat and SOCS box containing 7	-0.541357	0.0248165
BCAR1	9564	BCAR1 scaffold protein, Cas family member	-0.344364	0.0248634
LAMB1	3912	laminin subunit beta 1	-0.289985	0.0248935
DCAF12	25853	DDB1 and CUL4 associated factor 12	-0.370281	0.0249347
EVA1A	84141	eva-1 homolog A, regulator of programmed cell death	-0.968325	0.0250648
SERPINB6	5269	serpin family B member 6	-0.45971	0.0250842
ARFGEF2	10564	ADP ribosylation factor guanine nucleotide exchange factor 2	-0.556874	0.0251396
HDDC3	374659	HD domain containing 3	-0.807199	0.0251945
DIAPH3	81624	diaphanous related formin 3	0.391135	0.0252214
SLC1A1	6505	solute carrier family 1 member 1	-0.798658	0.0253378
XKR8	55113	XK related 8	-0.4793	0.025443
KRAS	3845	KRAS proto-oncogene, GTPase	-0.448883	0.0254558
TPX2	22974	TPX2 microtubule nucleation factor	0.307765	0.025456
TRADD	8717	TNFRSF1A associated via death domain	-0.812742	0.0254701
RNF149	284996	ring finger protein 149	0.33202	0.0256033
EFHD2	79180	EF-hand domain family member D2	-0.457749	0.0256732
CPSF4	10898	cleavage and polyadenylation specific factor 4	0.342911	0.0256955
WFS1	7466	wolframin ER transmembrane glycoprotein	-0.479396	0.0257085
NRP1	8829	neuropilin 1	-0.369267	0.0258191
PWP1	11137	PWP1 homolog, endonuclein	-0.333306	0.0258288
CDCA2	157313	cell division cycle associated 2	0.404214	0.0258342
GANC	2595	glucosidase alpha, neutral C	-0.747993	0.025842
TXNDC5	81567	thioredoxin domain containing 5	-0.437391	0.025864
RPL23AP82	284942	ribosomal protein L23a pseudogene 82	-0.430419	0.0258723
TMEM64	169200	transmembrane protein 64	-0.38269	0.0258863
PAQR8	85315	progestin and adipoQ receptor family member 8	-0.531202	0.0259735
ZNF555	148254	zinc finger protein 555	1.04032	0.0260802
TIRAP	114609	TIR domain containing adaptor protein	-0.833157	0.0261084
TMEM230	29058	transmembrane protein 230	-0.455422	0.0262189
YTHDF2	51441	YTH N6-methyladenosine RNA binding protein 2	0.309125	0.0263397
HOXA2	3199	homeobox A2	1.29278	0.026353
DCUN1D2	55208	defective in cullin neddylation 1 domain containing 2	0.308334	0.0263932
ACOT11	26027	acyl-CoA thioesterase 11	-0.746283	0.0264087
EXTL3-AS1	101929402	EXTL3 antisense RNA 1	0.97196	0.0264531
DOCK11	139818	dedicator of cytokinesis 11	-0.964109	0.0264634
NMRK1	54981	nicotinamide riboside kinase 1	-1.05951	0.0264655
RRM2B	50484	ribonucleotide reductase regulatory TP53 inducible subunit M2B	-0.619777	0.0265415
TAB2	23118	TGF-beta activated kinase 1 (MAP3K7) binding protein 2	-0.375053	0.0265458
RPL12	6136	ribosomal protein L12	0.483588	0.0265623
CHST14	113189	carbohydrate sulfotransferase 14	-0.456374	0.0265834
FRAT2	23401	FRAT regulator of WNT signaling pathway 2	-0.367184	0.0266621
RIN3	79890	Ras and Rab interactor 3	-0.612937	0.0266853
TMEM154	201799	transmembrane protein 154	-0.776684	0.0266937
EFR3A	23167	EFR3 homolog A	-0.5257	0.0267133
NDUFC1	4717	NADH:ubiquinone oxidoreductase subunit C1	-0.325096	0.026729
WDR12	55759	WD repeat domain 12	-0.634526	0.0268128
IGF1R	3480	insulin like growth factor 1 receptor	-0.71161	0.0268188
VKORC1L1	154807	vitamin K epoxide reductase complex subunit 1 like 1	-0.267194	0.0268784
RPL39	6170	ribosomal protein L39	0.415395	0.0268964
RALGAPB	57148	Ral GTPase activating protein non-catalytic beta subunit	-0.377295	0.0269889
TSPAN18	90139	tetraspanin 18	-0.80576	0.027018
PPT1	5538	palmitoyl-protein thioesterase 1	0.336463	0.0270609
CD14	929	CD14 molecule	1.0098	0.027108
NGDN	25983	neuroguidin	0.353164	0.0271083
NUP210	23225	nucleoporin 210	0.457812	0.0271119
EPS15	2060	epidermal growth factor receptor pathway substrate 15	-0.420004	0.0272298
EPB41L4A	64097	erythrocyte membrane protein band 4.1 like 4A	-0.757062	0.0272625
C11orf68	83638	chromosome 11 open reading frame 68	-0.727152	0.0272672
AP3B1	8546	adaptor related protein complex 3 subunit beta 1	-0.344731	0.0273079
DTD2	112487	D-aminoacyl-tRNA deacylase 2	-0.615664	0.0274018
TXNRD2	10587	thioredoxin reductase 2	-1.03773	0.0274037
TCAM1P	146771	testicular cell adhesion molecule 1, pseudogene	0.901886	0.0274099
RPF2	84154	ribosome production factor 2 homolog	0.330007	0.0275217
JSRP1	126306	junctional sarcoplasmic reticulum protein 1	0.824523	0.0275422
DNTTIP1	116092	deoxynucleotidyltransferase terminal interacting protein 1	-0.401857	0.0276036
ZNF263	10127	zinc finger protein 263	0.33736	0.027641
HSPH1	10808	heat shock protein family H (Hsp110) member 1	0.311861	0.0276893
DMAP1	55929	DNA methyltransferase 1 associated protein 1	-0.632946	0.0277165
ELK3	2004	ETS transcription factor ELK3	-0.47923	0.0277174
GALNT2	2590	polypeptide N-acetylgalactosaminyltransferase 2	-0.293128	0.0277497
AARS1	16	alanyl-tRNA synthetase 1	-0.340712	0.0277774
STK16	8576	serine/threonine kinase 16	-0.77668	0.0278009
PIEZO2	63895	piezo type mechanosensitive ion channel component 2	-0.806966	0.0278219
CADM4	199731	cell adhesion molecule 4	0.955482	0.0278704
S100A10	6281	S100 calcium binding protein A10	-0.788245	0.0278728
SLC35D2	11046	solute carrier family 35 member D2	-0.436242	0.027898
TEDC1	283643	tubulin epsilon and delta complex 1	-0.652714	0.027909
SLC35A3	23443	solute carrier family 35 member A3	-0.697178	0.0279908
COG7	91949	component of oligomeric golgi complex 7	0.770359	0.0281593
RRAD	6236	RRAD, Ras related glycolysis inhibitor and calcium channel regulator	0.732019	0.0281948
TP53INP1	94241	tumor protein p53 inducible nuclear protein 1	-1.13712	0.028211
APLN	8862	apelin	-1.02589	0.0282166
PSENEN	55851	presenilin enhancer, gamma-secretase subunit	-0.690048	0.0282833
CTSO	1519	cathepsin O	-0.995046	0.0283301
PTGER4	5734	prostaglandin E receptor 4	-0.569063	0.0283482
AMMECR1	9949	AMMECR nuclear protein 1	-0.55598	0.0283808
PDIA5	10954	protein disulfide isomerase family A member 5	-0.442988	0.0284404
USO1	8615	USO1 vesicle transport factor	-0.317295	0.028474
STXBP3	6814	syntaxin binding protein 3	-0.492021	0.0285543
HDGFL3	50810	HDGF like 3	-0.283567	0.028626
NFRKB	4798	nuclear factor related to kappaB binding protein	0.371195	0.0286459
SNAP47	116841	synaptosome associated protein 47	-0.441339	0.0287053
ARF4	378	ADP ribosylation factor 4	-0.534613	0.0288276
CREB1	1385	cAMP responsive element binding protein 1	0.436758	0.0288327
EWSR1	2130	EWS RNA binding protein 1	0.387525	0.0288757
SPTBN1	6711	spectrin beta, non-erythrocytic 1	-0.455114	0.0288809
TMEM47	83604	transmembrane protein 47	-0.379327	0.0289014
ARF3	377	ADP ribosylation factor 3	-0.547899	0.0289488
VPS37A	137492	VPS37A subunit of ESCRT-I	-0.384251	0.0289863
MRPL9	65005	mitochondrial ribosomal protein L9	-0.600466	0.0290004
NMB	4828	neuromedin B	0.426012	0.0290135
UBXN4	23190	UBX domain protein 4	-0.255407	0.0290285
E4F1	1877	E4F transcription factor 1	-0.505738	0.0290647
XRCC1	7515	X-ray repair cross complementing 1	-0.873914	0.0290819
ARRB2	409	arrestin beta 2	0.386059	0.0291254
PHLDA3	23612	pleckstrin homology like domain family A member 3	-0.653449	0.0291288
IRGQ	126298	immunity related GTPase Q	-0.513791	0.0291762
MMP16	4325	matrix metallopeptidase 16	-0.708666	0.0293809
HMGN3	9324	high mobility group nucleosomal binding domain 3	-0.464679	0.0293927
DNAL1	83544	dynein axonemal light chain 1	-0.701903	0.0294062
PDCD6	10016	programmed cell death 6	-0.385476	0.0294477
TMEM260	54916	transmembrane protein 260	-0.603695	0.0294506
ZNF362	149076	zinc finger protein 362	-0.552787	0.0295098
CEMIP	57214	cell migration inducing hyaluronidase 1	-1.54081	0.0295362
SOX12	6666	SRY-box transcription factor 12	-0.320156	0.0297159
CDC45	8318	cell division cycle 45	0.369831	0.0297508
PIGT	51604	phosphatidylinositol glycan anchor biosynthesis class T	0.267103	0.0298147
RMND5B	64777	required for meiotic nuclear division 5 homolog B	-0.64954	0.0298526
DCP1B	196513	decapping mRNA 1B	-0.876852	0.0298673
VPS33A	65082	VPS33A core subunit of CORVET and HOPS complexes	-0.407992	0.0298775
TMEFF1	8577	transmembrane protein with EGF like and two follistatin like domains 1	-0.830398	0.0298811
HOMER1	9456	homer scaffold protein 1	-0.584114	0.0299312
DDX60	55601	DExD/H-box helicase 60	0.748449	0.0299471
GRB10	2887	growth factor receptor bound protein 10	-0.310622	0.0300001
RPS19	6223	ribosomal protein S19	0.442174	0.0300727
RFC3	5983	replication factor C subunit 3	0.292424	0.0300994
PTGR2	145482	prostaglandin reductase 2	-0.708407	0.0301264
MTFMT	123263	mitochondrial methionyl-tRNA formyltransferase	-0.637121	0.0301314
BHLHB9	80823	basic helix-loop-helix family member b9	-0.932419	0.030243
JMJD4	65094	jumonji domain containing 4	-0.661432	0.0302506
MGLL	11343	monoglyceride lipase	-0.532198	0.0302523
MED16	10025	mediator complex subunit 16	-0.631145	0.0303028
HBA2	3040	hemoglobin subunit alpha 2	-0.636703	0.0303118
INAFM2	100505573	InaF motif containing 2	-0.459233	0.0303455
CEP68	23177	centrosomal protein 68	-0.679268	0.030367
ALDH9A1	223	aldehyde dehydrogenase 9 family member A1	-0.648666	0.030463
NUDT15	55270	nudix hydrolase 15	0.405931	0.0304854
ERV3-1	2086	endogenous retrovirus group 3 member 1, envelope	-0.370003	0.0304935
EVI5	7813	ecotropic viral integration site 5	-0.483628	0.0305892
KANSL1L	151050	KAT8 regulatory NSL complex subunit 1 like	-0.791606	0.0305997
LIMS3	96626	LIM zinc finger domain containing 3	-0.863884	0.0306453
CSNK2A2	1459	casein kinase 2 alpha 2	0.253829	0.030661
FTH1P3	2498	ferritin heavy chain 1 pseudogene 3	0.744613	0.0306642
IRF3	3661	interferon regulatory factor 3	-0.408309	0.0307039
NADSYN1	55191	NAD synthetase 1	-0.363132	0.0307266
MAT2B	27430	methionine adenosyltransferase 2B	-0.45394	0.0307729
KRT7	3855	keratin 7	-1.21494	0.0308052
ABHD2	11057	abhydrolase domain containing 2	-0.545887	0.0308403
MPP5	64398	membrane palmitoylated protein 5	0.34957	0.0308476
ZWINT	11130	ZW10 interacting kinetochore protein	0.355861	0.0308997
CLIC3	9022	chloride intracellular channel 3	-1.97331	0.0309853
BOK	666	BCL2 family apoptosis regulator BOK	-0.348753	0.0310674
SH3BGRL	6451	SH3 domain binding glutamate rich protein like	-0.443001	0.0311145
MYO18A	399687	myosin XVIIIA	-0.717089	0.0311248
FUNDC2	65991	FUN14 domain containing 2	0.30777	0.0311573
DLG1	1739	discs large MAGUK scaffold protein 1	-0.476305	0.0311703
MMP24	10893	matrix metallopeptidase 24	-0.665632	0.0311881
HSPA6	3310	heat shock protein family A (Hsp70) member 6	0.624962	0.0312525
ADCY6	112	adenylate cyclase 6	-0.469458	0.031312
NME7	29922	NME/NM23 family member 7	-0.50407	0.0313366
TMOD2	29767	tropomodulin 2	-1.14043	0.0313508
PDLIM7	9260	PDZ and LIM domain 7	-0.621238	0.0314001
TRIM22	10346	tripartite motif containing 22	-0.60494	0.0314203
ROCK2	9475	Rho associated coiled-coil containing protein kinase 2	-0.364087	0.031492
MFSD2A	84879	major facilitator superfamily domain containing 2A	-0.436674	0.0315376
MKRN1	23608	makorin ring finger protein 1	0.393164	0.0315428
ALYREF	10189	Aly/REF export factor	0.279175	0.0315706
UBE2J1	51465	ubiquitin conjugating enzyme E2 J1	-0.279643	0.0316298
CSK	1445	C-terminal Src kinase	-0.312612	0.0316443
OSTC	58505	oligosaccharyltransferase complex non-catalytic subunit	-0.510522	0.0316794
PARPBP	55010	PARP1 binding protein	0.532657	0.0316828
FOXRED2	80020	FAD dependent oxidoreductase domain containing 2	0.314601	0.0317704
LMBRD1	55788	LMBR1 domain containing 1	-0.565551	0.0317735
TRMT1	55621	tRNA methyltransferase 1	0.281139	0.0317884
RAD23A	5886	RAD23 homolog A, nucleotide excision repair protein	0.348014	0.0318054
SLC66A1	54896	solute carrier family 66 member 1	-0.284087	0.0318442
FOSL2	2355	FOS like 2, AP-1 transcription factor subunit	-0.448256	0.0318788
ORC6	23594	origin recognition complex subunit 6	0.329585	0.031895
RAP1B	5908	RAP1B, member of RAS oncogene family	-0.274148	0.0318967
TMSB4XP4	7118	TMSB4X pseudogene 4	-1.02727	0.031927
TRIM26	7726	tripartite motif containing 26	0.392689	0.0320252
ABCD1	215	ATP binding cassette subfamily D member 1	-0.737035	0.0320689
TMEM203	94107	transmembrane protein 203	-0.53392	0.032135
ZFYVE28	57732	zinc finger FYVE-type containing 28	-0.846881	0.0321387
NACAD	23148	NAC alpha domain containing	-1.62844	0.0321814
EDN1	1906	endothelin 1	-0.611576	0.0322433
RPL41	6171	ribosomal protein L41	0.32287	0.0322514
N4BP2	55728	NEDD4 binding protein 2	-0.582149	0.0322719
MFSD5	84975	major facilitator superfamily domain containing 5	-0.481821	0.0324914
NDUFA10	4705	NADH:ubiquinone oxidoreductase subunit A10	0.353189	0.0326068
PPP1R12B	4660	protein phosphatase 1 regulatory subunit 12B	1.19578	0.0326459
TRIM5	85363	tripartite motif containing 5	-0.439477	0.0326939
RNF34	80196	ring finger protein 34	-0.484302	0.0327766
NDRG1	10397	N-myc downstream regulated 1	-0.436379	0.0328176
RNF31	55072	ring finger protein 31	-0.551167	0.0328716
PANK4	55229	pantothenate kinase 4 (inactive)	-0.557624	0.0329142
PCMTD1	115294	protein-L-isoaspartate (D-aspartate) O-methyltransferase domain containing 1	-0.522799	0.0329327
MGAT4B	11282	alpha-1,3-mannosyl-glycoprotein 4-beta-N-acetylglucosaminyltransferase B	-0.404071	0.0329476
SMUG1	23583	single-strand-selective monofunctional uracil-DNA glycosylase 1	-0.653168	0.0329587
HNRNPLL	92906	heterogeneous nuclear ribonucleoprotein L like	-0.498242	0.0329957
IL6R	3570	interleukin 6 receptor	-0.437721	0.0330334
EPS8L1	54869	EPS8 like 1	-0.773262	0.0330376
EI24	9538	EI24 autophagy associated transmembrane protein	-0.317224	0.0331454
GMNN	51053	geminin DNA replication inhibitor	0.255148	0.0331617
AP1AR	55435	adaptor related protein complex 1 associated regulatory protein	-0.614392	0.0332258
PLXNA2	5362	plexin A2	-0.469817	0.0332278
UBE2I	7329	ubiquitin conjugating enzyme E2 I	-0.44018	0.0332613
ZBTB42	100128927	zinc finger and BTB domain containing 42	-0.563112	0.0333003
JDP2	122953	Jun dimerization protein 2	-0.754514	0.0333116
NUF2	83540	NUF2 component of NDC80 kinetochore complex	0.519216	0.0333121
MTX2	10651	metaxin 2	-0.367535	0.033383
POLE4	56655	DNA polymerase epsilon 4, accessory subunit	0.36167	0.0333936
ZNF268	10795	zinc finger protein 268	0.542682	0.033419
ZNF75D	7626	zinc finger protein 75D	-0.917609	0.0334429
SLC39A6	25800	solute carrier family 39 member 6	0.305193	0.0335187
ELOVL4	6785	ELOVL fatty acid elongase 4	0.418582	0.0335219
UFL1	23376	UFM1 specific ligase 1	-0.470787	0.0335421
LSM4	25804	LSM4 homolog, U6 small nuclear RNA and mRNA degradation associated	0.271646	0.0335421
MCTP1	79772	multiple C2 and transmembrane domain containing 1	-0.525771	0.0335512
MRPL45	84311	mitochondrial ribosomal protein L45	0.314024	0.033688
MIA3	375056	MIA SH3 domain ER export factor 3	-0.326504	0.0337276
SF3A2	8175	splicing factor 3a subunit 2	0.27997	0.0338363
BTN2A3P	54718	butyrophilin subfamily 2 member A3, pseudogene	-1.09202	0.0339841
TECR	9524	trans-2,3-enoyl-CoA reductase	0.321066	0.0339962
IFI30	10437	IFI30 lysosomal thiol reductase	0.497472	0.0340235
RPS10	6204	ribosomal protein S10	0.40728	0.0340885
SNRNP70	6625	small nuclear ribonucleoprotein U1 subunit 70	0.26519	0.0341921
CD59	966	CD59 molecule (CD59 blood group)	-0.333118	0.0342944
STX4	6810	syntaxin 4	-0.416665	0.034349
AP2A1	160	adaptor related protein complex 2 subunit alpha 1	-0.35865	0.0343743
ITPKA	3706	inositol-trisphosphate 3-kinase A	0.895569	0.0344287
SKIV2L	6499	Ski2 like RNA helicase	-0.615588	0.0344432
NMT1	4836	N-myristoyltransferase 1	-0.323505	0.0344557
CTPS2	56474	CTP synthase 2	-0.726764	0.0344655
ARMCX2	9823	armadillo repeat containing X-linked 2	-0.706716	0.0344745
HLTF	6596	helicase like transcription factor	0.33157	0.0345202
CNN2	1265	calponin 2	-0.507632	0.0345834
RPL30	6156	ribosomal protein L30	0.451256	0.0347152
CXCL16	58191	C-X-C motif chemokine ligand 16	0.404529	0.0348386
JPT1	51155	Jupiter microtubule associated homolog 1	-0.445174	0.0348615
LRSAM1	90678	leucine rich repeat and sterile alpha motif containing 1	-0.58748	0.0348744
SMC6	79677	structural maintenance of chromosomes 6	-0.300359	0.0349164
OR2L2	26246	olfactory receptor family 2 subfamily L member 2	-0.885748	0.034973
TPM3	7170	tropomyosin 3	-0.399629	0.0349871
DEXI	28955	Dexi homolog	-0.474641	0.0350157
CHST1	8534	carbohydrate sulfotransferase 1	-0.969219	0.0350236
BAX	581	BCL2 associated X, apoptosis regulator	-0.445874	0.035052
TRA2B	6434	transformer 2 beta homolog	0.322312	0.0350603
SIPA1	6494	signal-induced proliferation-associated 1	-0.424167	0.0351811
STN1	79991	STN1 subunit of CST complex	-0.622032	0.0351886
IL21R	50615	interleukin 21 receptor	-1.40156	0.0352958
HTR1B	3351	5-hydroxytryptamine receptor 1B	-1.02153	0.0354322
CBSL	102724560	cystathionine beta-synthase like	-0.666479	0.0354939
KIF4A	24137	kinesin family member 4A	0.541673	0.0355125
SLC27A4	10999	solute carrier family 27 member 4	-0.357969	0.035541
CPPED1	55313	calcineurin like phosphoesterase domain containing 1	-0.736389	0.0356333
KRT8P36	100418748	keratin 8 pseudogene 36	1.00482	0.0357514
UGT8	7368	UDP glycosyltransferase 8	0.628637	0.0358023
CUL7	9820	cullin 7	-0.586322	0.0358718
HSP90AB1	3326	heat shock protein 90 alpha family class B member 1	0.308318	0.0359084
NUCB1	4924	nucleobindin 1	0.251258	0.0359434
PET100	100131801	PET100 cytochrome c oxidase chaperone	-0.590497	0.0360199
GIMAP6	474344	GTPase, IMAP family member 6	-0.747335	0.0360371
B9D1	27077	B9 domain containing 1	-0.847959	0.0360541
ERCC2	2068	ERCC excision repair 2, TFIIH core complex helicase subunit	-0.747945	0.0360612
VPS4B	9525	vacuolar protein sorting 4 homolog B	-0.354816	0.0360665
RAC2	5880	Rac family small GTPase 2	-0.589082	0.0360975
POMT1	10585	protein O-mannosyltransferase 1	-0.426406	0.0361166
TIMMDC1	51300	translocase of inner mitochondrial membrane domain containing 1	-0.335849	0.0361174
SCAMP4	113178	secretory carrier membrane protein 4	0.266137	0.0361932
KLHL5	51088	kelch like family member 5	-0.347103	0.0362532
AJUBA	84962	ajuba LIM protein	-0.517405	0.0362627
CSTB	1476	cystatin B	-0.418308	0.0362912
YTHDC1	91746	YTH domain containing 1	0.329263	0.0363298
PITRM1	10531	pitrilysin metallopeptidase 1	-0.378768	0.0363415
SETD7	80854	SET domain containing 7, histone lysine methyltransferase	-0.400767	0.0363512
SLC39A9	55334	solute carrier family 39 member 9	-0.302211	0.0364106
PLCXD1	55344	phosphatidylinositol specific phospholipase C X domain containing 1	0.506443	0.0364257
DBI	1622	diazepam binding inhibitor, acyl-CoA binding protein	-0.312632	0.0364383
PTGFRN	5738	prostaglandin F2 receptor inhibitor	-0.509723	0.0364476
SCAF4	57466	SR-related CTD associated factor 4	0.415994	0.036463
MIRLET7A1HG	112903833	miRlet-7a-1/let-7f-1/let-7d cluster host gene	0.46848	0.0364851
NR3C1	2908	nuclear receptor subfamily 3 group C member 1	-0.438713	0.0365773
XPC	7508	XPC complex subunit, DNA damage recognition and repair factor	-0.423549	0.0365783
CLIC1	1192	chloride intracellular channel 1	-0.637485	0.0365803
CYP2U1	113612	cytochrome P450 family 2 subfamily U member 1	-0.371866	0.0366004
TPRKB	51002	TP53RK binding protein	0.295908	0.0366999
NCKAP1	10787	NCK associated protein 1	-0.319552	0.0367005
RASGRF2	5924	Ras protein specific guanine nucleotide releasing factor 2	-0.390672	0.0367163
SRSF11	9295	serine and arginine rich splicing factor 11	0.293608	0.0367259
PYURF	100996939	PIGY upstream reading frame	-0.39843	0.0367605
PCGF1	84759	polycomb group ring finger 1	0.453741	0.0367923
DCBLD1	285761	discoidin, CUB and LCCL domain containing 1	-0.31922	0.0368575
GNG5	2787	G protein subunit gamma 5	-0.355123	0.0368866
SNHG21	100505616	small nucleolar RNA host gene 21	0.444992	0.0369163
ASPH	444	aspartate beta-hydroxylase	-0.374642	0.0369282
PIK3C2B	5287	phosphatidylinositol-4-phosphate 3-kinase catalytic subunit type 2 beta	-0.850146	0.0369376
PTCD2	79810	pentatricopeptide repeat domain 2	-1.01224	0.0369877
ARRDC1	92714	arrestin domain containing 1	-0.634233	0.0370045
SLC6A6	6533	solute carrier family 6 member 6	-0.68142	0.0370092
C12orf10	60314	chromosome 12 open reading frame 10	-0.687067	0.0371337
PLCL1	5334	phospholipase C like 1 (inactive)	-0.59751	0.0372065
PLP2	5355	proteolipid protein 2	0.381796	0.0372374
PARP15	165631	poly(ADP-ribose) polymerase family member 15	0.548193	0.0373443
SMARCD3	6604	SWI/SNF related, matrix associated, actin dependent regulator of chromatin, subfamily d, member 3	-0.432107	0.0373926
RBM18	92400	RNA binding motif protein 18	0.413966	0.0374864
ARHGEF28	64283	Rho guanine nucleotide exchange factor 28	-0.478678	0.0376605
FDFT1	2222	farnesyl-diphosphate farnesyltransferase 1	-0.465355	0.0376798
RPS9	6203	ribosomal protein S9	0.326884	0.0377132
GUSB	2990	glucuronidase beta	0.324411	0.0377562
MTERF1	7978	mitochondrial transcription termination factor 1	0.552445	0.0378315
TIAM1	7074	TIAM Rac1 associated GEF 1	1.46328	0.037998
RIOK1	83732	RIO kinase 1	0.287965	0.0380888
CREB3	10488	cAMP responsive element binding protein 3	-0.581074	0.0381181
TIPRL	261726	TOR signaling pathway regulator	-0.330088	0.0381251
SNHG29	125144	small nucleolar RNA host gene 29	0.294202	0.0381337
KLF9	687	Kruppel like factor 9	-0.540962	0.038147
H1-0	3005	H1.0 linker histone	-0.558962	0.0381582
NLN	57486	neurolysin	-0.381951	0.0381948
LINC02245	400958	long intergenic non-protein coding RNA 2245	0.852769	0.0382373
ARPC2	10109	actin related protein 2/3 complex subunit 2	-0.377698	0.0382791
WDR37	22884	WD repeat domain 37	-0.332609	0.0383228
EEF1B2	1933	eukaryotic translation elongation factor 1 beta 2	0.338571	0.038473
GZF1	64412	GDNF inducible zinc finger protein 1	-0.600637	0.0385
LMLN	89782	leishmanolysin like peptidase	-0.552373	0.0385129
STAU2	27067	staufen double-stranded RNA binding protein 2	0.392145	0.038526
TST	7263	thiosulfate sulfurtransferase	-0.612867	0.0386412
IRAK1	3654	interleukin 1 receptor associated kinase 1	0.256219	0.0386828
ECI2	10455	enoyl-CoA delta isomerase 2	-0.931515	0.0387326
BLVRB	645	biliverdin reductase B	-0.518164	0.0387848
DNAJB1	3337	DnaJ heat shock protein family (Hsp40) member B1	0.39468	0.0388733
RPL35	11224	ribosomal protein L35	0.366167	0.0389973
ZSWIM9	374920	zinc finger SWIM-type containing 9	0.314095	0.0391114
ZRANB2	9406	zinc finger RANBP2-type containing 2	0.279956	0.0391201
SBF2	81846	SET binding factor 2	-0.500066	0.0391936
GGA3	23163	golgi associated, gamma adaptin ear containing, ARF binding protein 3	-0.73565	0.0393122
ORC1	4998	origin recognition complex subunit 1	0.275421	0.0393588
MIR99AHG	388815	mir-99a-let-7c cluster host gene	-0.783831	0.0393735
ZFAT	57623	zinc finger and AT-hook domain containing	0.488151	0.039529
NECTIN3	25945	nectin cell adhesion molecule 3	-0.364837	0.0396615
TMEM116	89894	transmembrane protein 116	0.545645	0.0397198
MPI	4351	mannose phosphate isomerase	-0.532767	0.0397258
DDHD1	80821	DDHD domain containing 1	0.316407	0.0397631
FZD8	8325	frizzled class receptor 8	-0.67314	0.0397904
MAPK7	5598	mitogen-activated protein kinase 7	-0.791053	0.0398086
CAND1	55832	cullin associated and neddylation dissociated 1	-0.357628	0.039814
FAM81A	145773	family with sequence similarity 81 member A	0.55506	0.0398266
USP46	64854	ubiquitin specific peptidase 46	-0.460541	0.0399737
SLC30A1	7779	solute carrier family 30 member 1	-0.665373	0.0399902
LYAR	55646	Ly1 antibody reactive	0.333378	0.0399987
POLM	27434	DNA polymerase mu	-0.735317	0.0400293
RPL18	6141	ribosomal protein L18	0.417422	0.040067
SNX17	9784	sorting nexin 17	-0.473548	0.0400737
CNTN3	5067	contactin 3	-1.23733	0.0400925
TBCEL	219899	tubulin folding cofactor E like	-0.507723	0.0401009
SCYL1	57410	SCY1 like pseudokinase 1	-0.300783	0.0401129
LSM10	84967	LSM10, U7 small nuclear RNA associated	-0.441694	0.0401208
EVA1C	59271	eva-1 homolog C	-0.422999	0.0402333
DDIT4	54541	DNA damage inducible transcript 4	-0.614399	0.0403788
NUP133	55746	nucleoporin 133	-0.33859	0.0403944
ZNF322	79692	zinc finger protein 322	-0.466625	0.0404712
PAGR1	79447	PAXIP1 associated glutamate rich protein 1	-0.475369	0.0404888
CHN1	1123	chimerin 1	0.387827	0.0405069
NEFH	4744	neurofilament heavy	0.589582	0.0405712
RAMP2	10266	receptor activity modifying protein 2	-0.858772	0.040743
NIP7	51388	nucleolar pre-rRNA processing protein NIP7	0.257084	0.0407681
HERC3	8916	HECT and RLD domain containing E3 ubiquitin protein ligase 3	-0.762509	0.0408046
SHROOM3	57619	shroom family member 3	0.889097	0.040821
DENND3	22898	DENN domain containing 3	-0.789566	0.0408872
ABCD4	5826	ATP binding cassette subfamily D member 4	-0.532559	0.0408946
ACOT13	55856	acyl-CoA thioesterase 13	-0.594905	0.0409078
HNRNPUL1	11100	heterogeneous nuclear ribonucleoprotein U like 1	0.26782	0.0409315
YAF2	10138	YY1 associated factor 2	0.43597	0.0409453
NABP2	79035	nucleic acid binding protein 2	0.262741	0.0409505
DST	667	dystonin	-0.405751	0.0410088
STARD4	134429	StAR related lipid transfer domain containing 4	-0.437565	0.0410522
BNIP3	664	BCL2 interacting protein 3	-0.331667	0.0410643
POLR3GL	84265	RNA polymerase III subunit G like	-0.515835	0.041099
HECTD3	79654	HECT domain E3 ubiquitin protein ligase 3	-0.565748	0.0411571
FKBP1A	2280	FKBP prolyl isomerase 1A	-0.580992	0.0412181
FOXC2	2303	forkhead box C2	-0.644875	0.0412538
ANTXR1	84168	ANTXR cell adhesion molecule 1	-0.506748	0.0413148
GLB1L2	89944	galactosidase beta 1 like 2	0.571933	0.0414249
PEX10	5192	peroxisomal biogenesis factor 10	-0.537466	0.0414364
CHCHD3	54927	coiled-coil-helix-coiled-coil-helix domain containing 3	0.305617	0.0414387
SLC25A46	91137	solute carrier family 25 member 46	-0.334646	0.0414859
FANCF	2188	FA complementation group F	-0.759681	0.041491
KPNA2	3838	karyopherin subunit alpha 2	0.304109	0.0415027
LSM7	51690	LSM7 homolog, U6 small nuclear RNA and mRNA degradation associated	0.378498	0.0416232
SYNJ2	8871	synaptojanin 2	-0.381336	0.0416296
HMOX1	3162	heme oxygenase 1	-0.521911	0.0416676
NIPSNAP3A	25934	nipsnap homolog 3A	-0.979924	0.0417094
RASL10B	91608	RAS like family 10 member B	0.77379	0.0418463
CAVIN2	8436	caveolae associated protein 2	-0.69994	0.0418616
EXOSC8	11340	exosome component 8	0.261659	0.0419201
TUT7	79670	terminal uridylyl transferase 7	0.387077	0.0419213
CRIP1	1396	cysteine rich protein 1	-0.942678	0.0419534
MAGED2	10916	MAGE family member D2	-0.639626	0.0421087
TNKS2	80351	tankyrase 2	-0.451898	0.0421993
HNRNPUL2	221092	heterogeneous nuclear ribonucleoprotein U like 2	-0.355191	0.0422016
ARL1	400	ADP ribosylation factor like GTPase 1	-0.406158	0.0423188
TRIM16	10626	tripartite motif containing 16	-0.545435	0.042366
NCSTN	23385	nicastrin	-0.275152	0.0424109
SAFB2	9667	scaffold attachment factor B2	0.275921	0.0424116
RND1	27289	Rho family GTPase 1	0.484571	0.042548
PTPN4	5775	protein tyrosine phosphatase non-receptor type 4	-0.612532	0.0426866
ULBP2	80328	UL16 binding protein 2	0.340319	0.0427021
SLC27A2	11001	solute carrier family 27 member 2	0.98491	0.0427242
MED23	9439	mediator complex subunit 23	0.373	0.0427349
IRF1	3659	interferon regulatory factor 1	-0.626735	0.0427675
COG5	10466	component of oligomeric golgi complex 5	-0.507981	0.0427882
GALNT10	55568	polypeptide N-acetylgalactosaminyltransferase 10	-0.317528	0.0428822
C4orf3	401152	chromosome 4 open reading frame 3	-0.349034	0.0430677
CPT2	1376	carnitine palmitoyltransferase 2	-0.614476	0.0431143
ARFGAP1	55738	ADP ribosylation factor GTPase activating protein 1	-0.303657	0.0431985
PRPF8	10594	pre-mRNA processing factor 8	-0.26391	0.0432987
GRPEL1	80273	GrpE like 1, mitochondrial	0.265731	0.0434024
APAF1	317	apoptotic peptidase activating factor 1	-0.571601	0.0434385
FAM114A1	92689	family with sequence similarity 114 member A1	-0.493084	0.0434503
RAB12	201475	RAB12, member RAS oncogene family	-0.306719	0.0434521
PCDH1	5097	protocadherin 1	-0.537382	0.0434573
RPL32	6161	ribosomal protein L32	0.330364	0.0434934
MIR137HG	400765	MIR137 host gene	-0.854801	0.0435006
TEKT4P2	100132288	tektin 4 pseudogene 2	-0.347312	0.0435238
SF3B6	51639	splicing factor 3b subunit 6	0.268413	0.0435377
COMMD6	170622	COMM domain containing 6	-0.460248	0.0435741
SNX4	8723	sorting nexin 4	-0.305197	0.0436844
RAB3GAP2	25782	RAB3 GTPase activating non-catalytic protein subunit 2	-0.29498	0.0436912
ESS2	8220	ess-2 splicing factor homolog	-0.391383	0.043718
FADS1	3992	fatty acid desaturase 1	-0.273588	0.0437528
SIN3B	23309	SIN3 transcription regulator family member B	-0.321482	0.0437842
NIPSNAP1	8508	nipsnap homolog 1	-0.615909	0.0438238
GNAL	2774	G protein subunit alpha L	0.617088	0.0439803
RAB14	51552	RAB14, member RAS oncogene family	-0.410726	0.0440589
ZNF836	162962	zinc finger protein 836	1.19287	0.0440659
C6orf62	81688	chromosome 6 open reading frame 62	-0.325794	0.0440862
GAS6	2621	growth arrest specific 6	0.300551	0.0441083
RALA	5898	RAS like proto-oncogene A	-0.468409	0.0441718
NEAT1	283131	nuclear paraspeckle assembly transcript 1	0.503321	0.0441777
FHL3	2275	four and a half LIM domains 3	-0.520307	0.0442915
CORO7-PAM16	100529144	CORO7-PAM16 readthrough	1.89586	0.0443548
PIK3CB	5291	phosphatidylinositol-4,5-bisphosphate 3-kinase catalytic subunit beta	-0.452605	0.0444033
GAA	2548	glucosidase alpha, acid	0.354822	0.0444483
HJURP	55355	Holliday junction recognition protein	-0.397747	0.0445114
DNAJB4	11080	DnaJ heat shock protein family (Hsp40) member B4	-0.350005	0.0445586
FERMT1	55612	fermitin family member 1	-0.791684	0.0446071
WBP1L	54838	WW domain binding protein 1 like	-0.391318	0.0446077
MTURN	222166	maturin, neural progenitor differentiation regulator homolog	-0.500368	0.0446979
FBH1	84893	F-box DNA helicase 1	-0.455894	0.0447445
SLC35A1	10559	solute carrier family 35 member A1	-0.667773	0.0447805
H2BC19P	337874	H2B clustered histone 19, pseudogene	-0.613747	0.0447894
ZNF48	197407	zinc finger protein 48	-0.801148	0.0449052
IFNAR2	3455	interferon alpha and beta receptor subunit 2	-0.495665	0.0449355
PLA2G12A	81579	phospholipase A2 group XIIA	-0.505545	0.0449474
HMGCL	3155	3-hydroxy-3-methylglutaryl-CoA lyase	-0.458884	0.0449637
NFATC4	4776	nuclear factor of activated T cells 4	-0.935001	0.0449686
UXT	8409	ubiquitously expressed prefoldin like chaperone	0.373765	0.0449963
TECPR1	25851	tectonin beta-propeller repeat containing 1	-0.817988	0.0450131
PMM1	5372	phosphomannomutase 1	-0.461689	0.0450703
CHMP7	91782	charged multivesicular body protein 7	0.393598	0.0450887
NUDT22	84304	nudix hydrolase 22	-0.614854	0.0451021
OAZ1	4946	ornithine decarboxylase antizyme 1	0.288735	0.0451431
EXOC2	55770	exocyst complex component 2	-0.554397	0.0451574
COPS3	8533	COP9 signalosome subunit 3	0.313182	0.0452166
HSP90AA1	3320	heat shock protein 90 alpha family class A member 1	0.398828	0.04528
BCAM	4059	basal cell adhesion molecule (Lutheran blood group)	0.357605	0.045289
HRAS	3265	HRas proto-oncogene, GTPase	-0.303962	0.045304
RPS6KA4	8986	ribosomal protein S6 kinase A4	-0.353409	0.0453414
TRAM2	9697	translocation associated membrane protein 2	-0.313042	0.0453629
AKT3	10000	AKT serine/threonine kinase 3	-0.349907	0.0454549
PDE1C	5137	phosphodiesterase 1C	0.922397	0.045629
HSPA2	3306	heat shock protein family A (Hsp70) member 2	0.475536	0.04569
SCML1	6322	Scm polycomb group protein like 1	0.353627	0.0457681
PDE3A	5139	phosphodiesterase 3A	-0.487624	0.0458546
CREB3L2	64764	cAMP responsive element binding protein 3 like 2	-0.491947	0.0458919
NCEH1	57552	neutral cholesterol ester hydrolase 1	-0.334121	0.0459048
ZNF777	27153	zinc finger protein 777	0.387651	0.0459571
NSMCE4A	54780	NSE4 homolog A, SMC5-SMC6 complex component	-0.413149	0.0459735
TSNAX	7257	translin associated factor X	-0.497427	0.0460091
ZNF560	147741	zinc finger protein 560	1.02443	0.0460386
NAGPA	51172	N-acetylglucosamine-1-phosphodiester alpha-N-acetylglucosaminidase	0.298412	0.0460554
KIAA1109	84162	KIAA1109	-0.707299	0.0460833
SEH1L	81929	SEH1 like nucleoporin	0.325737	0.0461471
BRD7	29117	bromodomain containing 7	0.260264	0.0461584
SPART	23111	spartin	-0.275211	0.046161
C5AR1	728	complement C5a receptor 1	1.4805	0.0461787
PTPRJ	5795	protein tyrosine phosphatase receptor type J	-0.457013	0.0465372
ZMYM3	9203	zinc finger MYM-type containing 3	-1.09327	0.0465391
CIART	148523	circadian associated repressor of transcription	0.605113	0.0465451
TMEM201	199953	transmembrane protein 201	0.266437	0.0465661
GGH	8836	gamma-glutamyl hydrolase	0.28659	0.0465693
CCDC85B	11007	coiled-coil domain containing 85B	-0.349871	0.0467013
METTL21A	151194	methyltransferase like 21A	0.428991	0.0467128
EXOC1	55763	exocyst complex component 1	-0.49178	0.0467431
NDUFA12	55967	NADH:ubiquinone oxidoreductase subunit A12	-0.465845	0.0467544
DMC1	11144	DNA meiotic recombinase 1	0.646343	0.0468267
U2AF1L4	199746	U2 small nuclear RNA auxiliary factor 1 like 4	-0.779088	0.0468314
IPPK	64768	inositol-pentakisphosphate 2-kinase	-0.548555	0.0468376
TUT4	23318	terminal uridylyl transferase 4	-0.511771	0.0468747
AP2M1	1173	adaptor related protein complex 2 subunit mu 1	-0.33743	0.0469106
GINS4	84296	GINS complex subunit 4	0.524602	0.0469481
TACC3	10460	transforming acidic coiled-coil containing protein 3	0.267516	0.0470045
MCL1	4170	MCL1 apoptosis regulator, BCL2 family member	-0.314651	0.0470258
ZNF468	90333	zinc finger protein 468	-0.504615	0.0470605
RBPMS	11030	RNA binding protein, mRNA processing factor	-0.360799	0.0471694
CASP17P	643733	caspase 17, pseudogene	0.592635	0.0471905
EPGN	255324	epithelial mitogen	-0.788056	0.0472111
MLLT3	4300	MLLT3 super elongation complex subunit	-0.656501	0.047255
BSDC1	55108	BSD domain containing 1	-0.320658	0.0472633
HRK	8739	harakiri, BCL2 interacting protein	-1.39673	0.0472709
JRKL	8690	JRK like	-0.559465	0.0472887
CETN2	1069	centrin 2	-0.501754	0.0472935
HOMER2	9455	homer scaffold protein 2	0.556284	0.0473478
LPXN	9404	leupaxin	-0.683914	0.047409
DDIAS	220042	DNA damage induced apoptosis suppressor	0.353289	0.0474316
SLC52A2	79581	solute carrier family 52 member 2	-0.346237	0.0476025
DVL3	1857	dishevelled segment polarity protein 3	-0.275978	0.0476534
ZNF200	7752	zinc finger protein 200	-0.42054	0.0476622
FHOD1	29109	formin homology 2 domain containing 1	-0.346561	0.0477294
WSB2	55884	WD repeat and SOCS box containing 2	-0.414362	0.0477474
C11orf98	102288414	chromosome 11 open reading frame 98	-0.302213	0.0477618
SLC45A3	85414	solute carrier family 45 member 3	-0.583651	0.0479338
MOSPD3	64598	motile sperm domain containing 3	-0.652159	0.0479377
EXOSC10	5394	exosome component 10	-0.275643	0.0480464
TMEM200A	114801	transmembrane protein 200A	-1.15917	0.0481815
NAAA	27163	N-acylethanolamine acid amidase	0.313088	0.048235
FRMPD1	22844	FERM and PDZ domain containing 1	0.397205	0.0484074
RN7SL134P	106479271	RNA, 7SL, cytoplasmic 134, pseudogene	1.0737	0.0484303
TBCCD1	55171	TBCC domain containing 1	-0.411939	0.0484555
PDE8A	5151	phosphodiesterase 8A	-0.372708	0.0484673
E2F1	1869	E2F transcription factor 1	0.335696	0.0485468
RPLP2	6181	ribosomal protein lateral stalk subunit P2	0.365104	0.048555
GOLGA5	9950	golgin A5	-0.407133	0.0485927
NAA15	80155	N(alpha)-acetyltransferase 15, NatA auxiliary subunit	0.322331	0.0487061
ATP6V0E1	8992	ATPase H+ transporting V0 subunit e1	-0.287563	0.0487069
CUL3	8452	cullin 3	0.295865	0.0487599
SIL1	64374	SIL1 nucleotide exchange factor	-0.391619	0.0487794
POLD1	5424	DNA polymerase delta 1, catalytic subunit	0.281496	0.0488363
XRCC6	2547	X-ray repair cross complementing 6	0.270102	0.0488577
CS	1431	citrate synthase	0.264681	0.0488778
MAPK14	1432	mitogen-activated protein kinase 14	-0.315362	0.0488956
LAMP3	27074	lysosomal associated membrane protein 3	0.586018	0.0489039
BUD23	114049	BUD23 rRNA methyltransferase and ribosome maturation factor	0.268745	0.0490255
RPL23AP42	647099	ribosomal protein L23a pseudogene 42	0.405197	0.04904
TOX	9760	thymocyte selection associated high mobility group box	-0.944493	0.0490835
EVI5L	115704	ecotropic viral integration site 5 like	-0.323637	0.0490838
BTG2	7832	BTG anti-proliferation factor 2	-0.689039	0.0491257
GTF3C5	9328	general transcription factor IIIC subunit 5	-0.307817	0.0492595
HSPA7	3311	heat shock protein family A (Hsp70) member 7	0.985888	0.0492609
SMIM10L1	100129361	small integral membrane protein 10 like 1	-0.38324	0.0492627
MMS19	64210	MMS19 homolog, cytosolic iron-sulfur assembly component	-0.522814	0.0493217
DRG2	1819	developmentally regulated GTP binding protein 2	0.374577	0.0493274
TJP2	9414	tight junction protein 2	-0.308576	0.0493791
RAD51AP1	10635	RAD51 associated protein 1	0.371232	0.0494566
RPS6	6194	ribosomal protein S6	0.415881	0.0494647
UBE4B	10277	ubiquitination factor E4B	-0.288407	0.0495293
TMEM167B	56900	transmembrane protein 167B	-0.351835	0.049534
GNL2	29889	G protein nucleolar 2	0.261012	0.0496717
TMEM158	25907	transmembrane protein 158 (gene/pseudogene)	-0.325709	0.0497986
APPL2	55198	adaptor protein, phosphotyrosine interacting with PH domain and leucine zipper 2	-0.484702	0.0497992
TENT4B	64282	terminal nucleotidyltransferase 4B	0.301978	0.0498161
ACTR3B	57180	actin related protein 3B	-0.418678	0.0498562
SPCS1	28972	signal peptidase complex subunit 1	-0.361343	0.0498575
ST20-AS1	283687	ST20 antisense RNA 1	-0.966874	0.0499163
CCT2	10576	chaperonin containing TCP1 subunit 2	0.373931	0.0499378

## Sheet: SMC- BMPR2 knockdown in Normox.
SYMBOL	ENTREZID	GENENAME	logFC	PValue
AADAC	13	arylacetamide deacetylase	-0.62997	0.0275193
AARSD1	80755	alanyl-tRNA synthetase domain containing 1	-0.345497	0.0284745
ABLIM3	22885	actin binding LIM protein family member 3	0.404806	0.0484979
ACAT2	39	acetyl-CoA acetyltransferase 2	0.659801	0.0372438
ACOT1	641371	acyl-CoA thioesterase 1	0.657838	0.019468
ACSL5	51703	acyl-CoA synthetase long chain family member 5	1.37414	0.0319922
ACSS2	55902	acyl-CoA synthetase short chain family member 2	0.724596	0.00190578
ACY1	95	aminoacylase 1	0.339291	0.028344
ADAM19	8728	ADAM metallopeptidase domain 19	-0.392709	0.0144298
ADAMTS1	9510	ADAM metallopeptidase with thrombospondin type 1 motif 1	-0.297977	0.0323958
ADAMTS6	11174	ADAM metallopeptidase with thrombospondin type 1 motif 6	-0.779447	0.00194676
ADAP1	11033	ArfGAP with dual PH domains 1	0.710713	0.0349423
ADCY1	107	adenylate cyclase 1	1.06017	0.0230144
ADCY7	113	adenylate cyclase 7	-0.467202	0.0117404
ADGRG6	57211	adhesion G protein-coupled receptor G6	-1.19757	0.00583775
ADIRF	10974	adipogenesis regulatory factor	-0.339339	0.0447208
AGPAT3	56894	1-acylglycerol-3-phosphate O-acyltransferase 3	0.309149	0.00259137
AKAP12	9590	A-kinase anchoring protein 12	-0.316324	0.0224902
AKAP6	9472	A-kinase anchoring protein 6	0.637723	0.0415925
ALDH18A1	5832	aldehyde dehydrogenase 18 family member A1	-0.353352	0.016629
ALDOA	226	aldolase, fructose-bisphosphate A	-0.289335	0.0135875
ALG13	79868	ALG13 UDP-N-acetylglucosaminyltransferase subunit	-0.323774	0.0397087
AMBRA1	55626	autophagy and beclin 1 regulator 1	0.315053	0.0467524
AMDHD2	51005	amidohydrolase domain containing 2	0.443208	0.0208886
AMOTL2	51421	angiomotin like 2	-0.541366	0.0236919
AMPD2	271	adenosine monophosphate deaminase 2	-0.350893	0.0459091
ANGPTL4	51129	angiopoietin like 4	-0.689413	0.0412174
ANKRD1	27063	ankyrin repeat domain 1	-1.22393	0.0152142
ANKRD20A5P	440482	ankyrin repeat domain 20 family member A5, pseudogene	1.29663	0.00339582
ANKRD36C	400986	ankyrin repeat domain 36C	0.878852	0.0271114
ANLN	54443	anillin actin binding protein	-1.23699	0.00763418
ANXA5	308	annexin A5	-0.282877	0.0266193
AOPEP	84909	aminopeptidase O (putative)	-0.54581	0.0270929
APCDD1L	164284	APC down-regulated 1 like	-0.409275	0.0143277
APLN	8862	apelin	-1.42961	0.000164103
APOL3	80833	apolipoprotein L3	0.660622	0.0399047
APTX	54840	aprataxin	0.269329	0.0389801
ARAP3	64411	ArfGAP with RhoGAP domain, ankyrin repeat and PH domain 3	0.308642	0.0264
ARF4	378	ADP ribosylation factor 4	-0.264112	0.0248772
ARL4C	10123	ADP ribosylation factor like GTPase 4C	0.476082	0.0355291
ARMC9	80210	armadillo repeat containing 9	0.420628	0.0198585
ARMCX2	9823	armadillo repeat containing X-linked 2	-0.346817	0.0449123
ARRB1	408	arrestin beta 1	0.410297	0.0359914
ARSJ	79642	arylsulfatase family member J	-0.411718	0.0383135
ASPM	259266	abnormal spindle microtubule assembly	-1.48617	0.00625637
ASS1	445	argininosuccinate synthase 1	-0.412625	0.0170393
ATAD2B	54454	ATPase family AAA domain containing 2B	-0.565232	0.0112286
ATF6B	1388	activating transcription factor 6 beta	0.260866	0.0460798
ATP2B1-AS1	338758	ATP2B1 antisense RNA 1	0.72397	0.0298063
ATP5ME	521	ATP synthase membrane subunit e	-0.305367	0.0101735
ATP6V0E2	155066	ATPase H+ transporting V0 subunit e2	0.454998	0.0318982
ATPAF2	91647	ATP synthase mitochondrial F1 complex assembly factor 2	0.592377	0.0200764
ATRX	546	ATRX chromatin remodeler	0.294257	0.0247728
ATXN3	4287	ataxin 3	0.349504	0.0184225
AURKB	9212	aurora kinase B	-1.1622	0.041229
AXL	558	AXL receptor tyrosine kinase	-0.481053	0.00181064
B4GALT4	8702	beta-1,4-galactosyltransferase 4	-0.333865	0.0281061
B4GALT7	11285	beta-1,4-galactosyltransferase 7	-0.278179	0.039137
BCKDK	10295	branched chain keto acid dehydrogenase kinase	-0.383593	0.00677784
BDH1	622	3-hydroxybutyrate dehydrogenase 1	0.938516	0.0113341
BDNF	627	brain derived neurotrophic factor	-0.826453	0.0207817
BEST1	7439	bestrophin 1	0.520436	0.00259596
BET1L	51272	Bet1 golgi vesicular membrane trafficking protein like	-0.276687	0.0219369
BGN	633	biglycan	-0.89879	6.86551e-05
BIRC5	332	baculoviral IAP repeat containing 5	-1.0813	0.0055609
BMP1	649	bone morphogenetic protein 1	-0.4012	0.0225219
BMP6	654	bone morphogenetic protein 6	-0.755811	0.0352311
BNIP3	664	BCL2 interacting protein 3	-0.44367	0.00210551
BUB1	699	BUB1 mitotic checkpoint serine/threonine kinase	-1.002	0.0423618
BUB1B	701	BUB1 mitotic checkpoint serine/threonine kinase B	-1.69658	0.0308044
C11orf68	83638	chromosome 11 open reading frame 68	-0.26044	0.0414931
C12orf49	79794	chromosome 12 open reading frame 49	0.365864	0.0483004
C1QTNF5	114902	C1q and TNF related 5	0.69424	0.00641529
C3orf62	375341	chromosome 3 open reading frame 62	-1.00993	0.00874608
C5orf46	389336	chromosome 5 open reading frame 46	-1.02672	0.0211911
C6orf141	135398	chromosome 6 open reading frame 141	1.13042	0.0480954
CA11	770	carbonic anhydrase 11	1.553	0.0358939
CA9	768	carbonic anhydrase 9	-1.59337	0.0014356
CALM2	805	calmodulin 2	-0.257475	0.0387103
CALU	813	calumenin	-0.28103	0.011135
CARD11	84433	caspase recruitment domain family member 11	-0.672492	0.0356507
CASP6	839	caspase 6	0.513425	0.0432025
CASP8AP2	9994	caspase 8 associated protein 2	-0.30605	0.0452913
CAV1	857	caveolin 1	-0.397392	0.0171215
CAVIN1	284119	caveolae associated protein 1	-0.410714	0.0131366
CCDC124	115098	coiled-coil domain containing 124	-0.285723	0.0127494
CCDC77	84318	coiled-coil domain containing 77	-0.504046	0.00627443
CCDC80	151887	coiled-coil domain containing 80	-0.457063	0.0069073
CCDC9	26093	coiled-coil domain containing 9	-0.474993	0.00161982
CCDC96	257236	coiled-coil domain containing 96	0.542442	0.0341457
CCL11	6356	C-C motif chemokine ligand 11	-1.58017	0.0138403
CCN2	1490	cellular communication network factor 2	-1.27571	0.00103374
CCN4	8840	cellular communication network factor 4	-1.27099	0.00233071
CCNA2	890	cyclin A2	-1.10303	0.0297873
CCND3	896	cyclin D3	-0.396753	0.0201763
CCNY	219771	cyclin Y	0.254877	0.0479211
CD109	135228	CD109 molecule	0.45407	0.0349848
CD200	4345	CD200 molecule	-0.683579	0.0433076
CD274	29126	CD274 molecule	-0.849026	0.00752166
CDA	978	cytidine deaminase	-0.858394	0.0413623
CDC25A	993	cell division cycle 25A	-1.03078	0.00926154
CDC27	996	cell division cycle 27	-0.282336	0.0351418
CDC37	11140	cell division cycle 37	-0.267405	0.0331046
CDC42EP5	148170	CDC42 effector protein 5	-0.484116	0.0199638
CDC73	79577	cell division cycle 73	0.285078	0.0305208
CDCA2	157313	cell division cycle associated 2	-0.764944	0.0453602
CDCA4	55038	cell division cycle associated 4	-0.319298	0.047545
CDCA8	55143	cell division cycle associated 8	-1.53057	0.00670963
CDH11	1009	cadherin 11	-0.408998	0.032154
CDH13	1012	cadherin 13	-0.748253	0.000209799
CDH2	1000	cadherin 2	-0.406532	0.00703514
CDH5	1003	cadherin 5	-0.691989	0.0462529
CDK2AP1	8099	cyclin dependent kinase 2 associated protein 1	-0.329758	0.0122149
CDKN2B	1030	cyclin dependent kinase inhibitor 2B	0.733248	0.00612309
CDKN2C	1031	cyclin dependent kinase inhibitor 2C	-1.13055	0.000295058
CEMIP	57214	cell migration inducing hyaluronidase 1	-1.21379	0.0250031
CENPJ	55835	centromere protein J	-0.741315	0.0240198
CEP250	11190	centrosomal protein 250	0.68303	0.00779619
CEP68	23177	centrosomal protein 68	0.393725	0.0222369
CHSY1	22856	chondroitin sulfate synthase 1	-0.456517	0.0182803
CHURC1	91612	churchill domain containing 1	0.415979	0.0268773
CIP2A	57650	cell proliferation regulating inhibitor of protein phosphatase 2A	-0.71078	0.00754049
CKAP2L	150468	cytoskeleton associated protein 2 like	-1.29903	0.00445517
CKMT2	1160	creatine kinase, mitochondrial 2	0.694517	0.0416681
CLCN7	1186	chloride voltage-gated channel 7	0.414105	0.0093832
CLK4	57396	CDC like kinase 4	-0.551122	0.0131601
CLPB	81570	ClpB homolog, mitochondrial AAA ATPase chaperonin	-0.316616	0.0421346
CMIP	80790	c-Maf inducing protein	-0.487074	0.0101685
CNIH3	149111	cornichon family AMPA receptor auxiliary protein 3	0.363519	0.0348436
CNN2	1265	calponin 2	-0.406441	0.00463341
CNOT8	9337	CCR4-NOT transcription complex subunit 8	-0.306232	0.0160343
COG1	9382	component of oligomeric golgi complex 1	-0.31391	0.0251714
COL3A1	1281	collagen type III alpha 1 chain	-0.687399	0.0260715
COL4A1	1282	collagen type IV alpha 1 chain	-0.586265	0.00577158
COL4A2	1284	collagen type IV alpha 2 chain	-0.368575	0.0466788
COL5A1	1289	collagen type V alpha 1 chain	-0.759408	0.00323454
COL5A2	1290	collagen type V alpha 2 chain	-0.51651	0.0149868
COL5A3	50509	collagen type V alpha 3 chain	-0.718435	0.0253097
COL6A1	1291	collagen type VI alpha 1 chain	-0.419019	0.00904837
COL6A2	1292	collagen type VI alpha 2 chain	-0.327699	0.0397921
COMMD2	51122	COMM domain containing 2	-0.376201	0.0207192
COQ8A	56997	coenzyme Q8A	0.427056	0.0281157
COX7A1	1346	cytochrome c oxidase subunit 7A1	-0.604593	0.0114936
COX8A	1351	cytochrome c oxidase subunit 8A	-0.316843	0.0104891
CPT1A	1374	carnitine palmitoyltransferase 1A	0.372317	0.0290061
CRABP2	1382	cellular retinoic acid binding protein 2	-1.11293	9.05348e-05
CRHBP	1393	corticotropin releasing hormone binding protein	-0.601921	0.00976474
CRIP2	1397	cysteine rich protein 2	-0.427399	0.00408444
CRYBB2P1	1416	crystallin beta B2 pseudogene 1	-0.365516	0.0263507
CSF2RB	1439	colony stimulating factor 2 receptor beta common subunit	-1.62418	0.00681453
CSMD2	114784	CUB and Sushi multiple domains 2	-0.685677	0.00647046
CSRP1	1465	cysteine and glycine rich protein 1	-0.376461	0.00578759
CTNNAL1	8727	catenin alpha like 1	-0.401727	0.0123774
CTSK	1513	cathepsin K	0.512987	0.0134626
CTSS	1520	cathepsin S	0.72793	0.00848368
CUBN	8029	cubilin	1.00449	0.0343125
CXCL2	2920	C-X-C motif chemokine ligand 2	0.679796	0.013015
CYB561	1534	cytochrome b561	-0.296226	0.0346398
CYB561A3	220002	cytochrome b561 family member A3	0.370689	0.049159
CYBA	1535	cytochrome b-245 alpha chain	-0.401667	0.0243367
CYP4V2	285440	cytochrome P450 family 4 subfamily V member 2	0.577247	0.00049775
CYP51A1	1595	cytochrome P450 family 51 subfamily A member 1	0.468738	0.0262588
DACT1	51339	dishevelled binding antagonist of beta catenin 1	-0.274344	0.0394202
DAW1	164781	dynein assembly factor with WD repeats 1	-1.18185	0.0110433
DDAH1	23576	dimethylarginine dimethylaminohydrolase 1	-0.494761	0.0248967
DENND4A	10260	DENN domain containing 4A	-0.367349	0.0487223
DGKI	9162	diacylglycerol kinase iota	0.560454	0.00763235
DHCR24	1718	24-dehydrocholesterol reductase	0.568979	0.0156369
DHCR7	1717	7-dehydrocholesterol reductase	0.653605	0.00556392
DIAPH3	81624	diaphanous related formin 3	-1.10104	0.0101826
DIRAS2	54769	DIRAS family GTPase 2	1.08927	0.045421
DIRAS3	9077	DIRAS family GTPase 3	-1.23857	0.00369332
DLC1	10395	DLC1 Rho GTPase activating protein	-0.523577	0.00307933
DLGAP1-AS2	84777	DLGAP1 antisense RNA 2	0.461507	0.0455512
DMXL2	23312	Dmx like 2	-0.344137	0.0215851
DNAJB4	11080	DnaJ heat shock protein family (Hsp40) member B4	-0.303089	0.0461221
DNAJC1	64215	DnaJ heat shock protein family (Hsp40) member C1	-0.273881	0.0372794
DNMBP	23268	dynamin binding protein	-0.494697	0.0016187
DPH6	89978	diphthamine biosynthesis 6	0.696872	0.0352493
DPP4-DT	100131604	DPP4 divergent transcript	1.18195	0.0180179
DROSHA	29102	drosha ribonuclease III	-0.58439	0.0227224
DSP	1832	desmoplakin	-0.403118	0.00808758
DUSP5	1847	dual specificity phosphatase 5	0.400277	0.045915
DYRK4	8798	dual specificity tyrosine phosphorylation regulated kinase 4	-0.348465	0.0487756
EBF3	253738	EBF transcription factor 3	-0.620727	0.018204
ECT2	1894	epithelial cell transforming 2	-0.496167	0.0149594
EDEM1	9695	ER degradation enhancing alpha-mannosidase like protein 1	0.310327	0.00800113
EDN1	1906	endothelin 1	-1.81722	0.00114763
EED	8726	embryonic ectoderm development	-0.28667	0.0331213
EEF1A1P5	158078	eukaryotic translation elongation factor 1 alpha 1 pseudogene 5	0.669036	0.0357754
EEF1A2	1917	eukaryotic translation elongation factor 1 alpha 2	-0.818923	0.0259874
EFEMP1	2202	EGF containing fibulin extracellular matrix protein 1	-0.645233	0.000749248
EFEMP2	30008	EGF containing fibulin extracellular matrix protein 2	-0.347933	0.00714157
EFHC1	114327	EF-hand domain containing 1	0.378137	0.0416731
EFNA5	1946	ephrin A5	-0.705188	0.0276625
EIF3J-DT	645212	EIF3J divergent transcript	0.53442	0.0332784
ELN	2006	elastin	-1.35028	0.00148471
ELOVL6	79071	ELOVL fatty acid elongase 6	0.296043	0.028645
EMILIN2	84034	elastin microfibril interfacer 2	0.45234	0.0191258
ENO1	2023	enolase 1	-0.358284	0.00739345
EPB41	2035	erythrocyte membrane protein band 4.1	0.515193	0.0160917
ERGIC1	57222	endoplasmic reticulum-golgi intermediate compartment 1	-0.332492	0.0152248
ERRFI1	54206	ERBB receptor feedback inhibitor 1	-0.509794	0.0366352
FABP3	2170	fatty acid binding protein 3	1.57694	0.00537221
FADS1	3992	fatty acid desaturase 1	0.691115	0.0051733
FADS2	9415	fatty acid desaturase 2	0.586016	0.00190764
FAM102A	399665	family with sequence similarity 102 member A	0.751432	0.0130251
FAM120C	54954	family with sequence similarity 120C	-0.545555	0.0407291
FAM149B1	317662	family with sequence similarity 149 member B1	-0.308322	0.0246484
FAM157A	728262	family with sequence similarity 157 member A	0.919937	0.0431613
FAM162A	26355	family with sequence similarity 162 member A	-0.32074	0.034039
FAM187A	100528020	family with sequence similarity 187 member A	0.641004	0.0393924
FAM83D	81610	family with sequence similarity 83 member D	-0.730169	0.0485252
FASN	2194	fatty acid synthase	0.589573	0.00499718
FAT3	120114	FAT atypical cadherin 3	2.17265	0.0115863
FBLN2	2199	fibulin 2	-0.301033	0.0342572
FBN1	2200	fibrillin 1	-0.473399	0.00548333
FBXL2	25827	F-box and leucine rich repeat protein 2	-0.650037	0.0276843
FBXO27	126433	F-box protein 27	0.60899	0.0222663
FBXO42	54455	F-box protein 42	-0.309568	0.0285787
FBXO5	26271	F-box protein 5	-0.614355	0.0261846
FDFT1	2222	farnesyl-diphosphate farnesyltransferase 1	0.550947	0.00339941
FDPS	2224	farnesyl diphosphate synthase	0.609124	0.0023385
FECH	2235	ferrochelatase	-0.296549	0.0498003
FERMT2	10979	fermitin family member 2	-0.303653	0.039786
FGF13	2258	fibroblast growth factor 13	0.742365	0.0444073
FHL2	2274	four and a half LIM domains 2	-0.280454	0.00504761
FIG4	9896	FIG4 phosphoinositide 5-phosphatase	0.29017	0.0394451
FJX1	24147	four-jointed box kinase 1	-0.389679	0.0441443
FKBP10	60681	FKBP prolyl isomerase 10	-0.277033	0.0123903
FKBP11	51303	FKBP prolyl isomerase 11	-0.626852	0.00273307
FKBP14	55033	FKBP prolyl isomerase 14	-0.389121	0.0270018
FMOD	2331	fibromodulin	-0.882514	0.00214506
FN1	2335	fibronectin 1	-0.456658	0.00963009
FNDC3A	22862	fibronectin type III domain containing 3A	-0.305447	0.0184101
FOXD1	2297	forkhead box D1	-0.381091	0.0242496
FOXRED2	80020	FAD dependent oxidoreductase domain containing 2	0.449192	0.00976424
FSCN1	6624	fascin actin-bundling protein 1	-0.340488	0.00677905
FSTL1	11167	follistatin like 1	-0.418797	0.0304951
FSTL3	10272	follistatin like 3	-0.404781	0.021706
FTSJ1	24140	FtsJ RNA 2'-O-methyltransferase 1	-0.281995	0.0347877
FXYD5	53827	FXYD domain containing ion transport regulator 5	-0.263873	0.0271523
GALNT15	117248	polypeptide N-acetylgalactosaminyltransferase 15	-0.869007	0.0175375
GAPDH	2597	glyceraldehyde-3-phosphate dehydrogenase	-0.341794	0.00485384
GCNT1	2650	glucosaminyl (N-acetyl) transferase 1	-0.944428	0.0422455
GINS2	51659	GINS complex subunit 2	-0.733464	0.0488658
GLDN	342035	gliomedin	0.856013	0.0279812
GPHN	10243	gephyrin	0.71063	0.0396897
GPNMB	10457	glycoprotein nmb	0.37094	0.0238804
GPRC5A	9052	G protein-coupled receptor class C group 5 member A	-0.629682	0.0365998
GPRIN1	114787	G protein regulated inducer of neurite outgrowth 1	0.59395	0.00271663
GPSM2	29899	G protein signaling modulator 2	-0.881514	0.00802303
GPT2	84706	glutamic--pyruvic transaminase 2	-0.329935	0.0181191
GPX7	2882	glutathione peroxidase 7	-0.342706	0.0438784
GRAMD1B	57476	GRAM domain containing 1B	-0.588484	0.0451097
GSPT2	23708	G1 to S phase transition 2	-0.295641	0.0277414
GYS1	2997	glycogen synthase 1	-0.40329	0.00743711
H19	283120	H19 imprinted maternally expressed transcript	-2.78415	0.00161027
H2BC21	8349	H2B clustered histone 21	0.569001	0.0148247
H3-3B	3021	H3.3 histone B	0.292036	0.0136393
HABP4	22927	hyaluronan binding protein 4	0.360177	0.0495593
HAS2	3037	hyaluronan synthase 2	-1.26618	0.00164307
HHIP	64399	hedgehog interacting protein	-0.854115	0.00647503
HILPDA	29923	hypoxia inducible lipid droplet associated	-0.580133	0.0237475
HMGA2	8091	high mobility group AT-hook 2	0.313688	0.0126302
HMGCR	3156	3-hydroxy-3-methylglutaryl-CoA reductase	0.406473	0.021875
HMGCS1	3157	3-hydroxy-3-methylglutaryl-CoA synthase 1	0.685337	0.0079454
HNRNPAB	3182	heterogeneous nuclear ribonucleoprotein A/B	-0.32342	0.0384079
HOMER1	9456	homer scaffold protein 1	-0.449234	0.0309252
HPS4	89781	HPS4 biogenesis of lysosomal organelles complex 3 subunit 2	0.3611	0.0307221
HSD17B12	51144	hydroxysteroid 17-beta dehydrogenase 12	0.313155	0.0368386
HSPA2	3306	heat shock protein family A (Hsp70) member 2	-0.664413	0.0438813
HSPE1	3336	heat shock protein family E (Hsp10) member 1	-0.287537	0.029735
HSPG2	3339	heparan sulfate proteoglycan 2	-0.528977	0.0239063
HTRA3	94031	HtrA serine peptidase 3	-0.326576	0.0210304
ICAM5	7087	intercellular adhesion molecule 5	-0.675556	0.00516109
ID1	3397	inhibitor of DNA binding 1, HLH protein	-0.70418	0.0496813
IDI1	3422	isopentenyl-diphosphate delta isomerase 1	0.553413	0.00580917
IFI27	3429	interferon alpha inducible protein 27	-0.832815	0.0248964
IFITM2	10581	interferon induced transmembrane protein 2	-0.572294	0.00137702
IFITM3	10410	interferon induced transmembrane protein 3	-0.529785	0.000272362
IGFBP3	3486	insulin like growth factor binding protein 3	-0.909611	0.00866592
IGFBP7	3490	insulin like growth factor binding protein 7	-0.292421	0.0411317
IKBIP	121457	IKBKB interacting protein	-0.33362	0.0068242
IL11	3589	interleukin 11	-1.46534	0.0156719
IL15RA	3601	interleukin 15 receptor subunit alpha	0.716561	0.0348922
IL17RA	23765	interleukin 17 receptor A	-0.299776	0.0361588
IL4I1	259307	interleukin 4 induced 1	1.23091	0.00364771
ILK	3611	integrin linked kinase	-0.270657	0.014548
INSIG1	3638	insulin induced gene 1	0.553549	0.00601942
INSYN2B	100131897	inhibitory synaptic factor family member 2B	-0.344727	0.0386699
IRF1	3659	interferon regulatory factor 1	0.918518	0.000715263
ISG20	3669	interferon stimulated exonuclease gene 20	-0.794183	0.0166767
ISLR	3671	immunoglobulin superfamily containing leucine rich repeat	-0.456193	0.0231209
ITGB3	3690	integrin subunit beta 3	0.259402	0.0361521
ITGBL1	9358	integrin subunit beta like 1	-0.571954	0.00157141
ITPK1	3705	inositol-tetrakisphosphate 1-kinase	0.369502	0.0192931
JTB	10899	jumping translocation breakpoint	-0.265505	0.0291304
KANSL1L	151050	KAT8 regulatory NSL complex subunit 1 like	0.379248	0.0425707
KCND2	3751	potassium voltage-gated channel subfamily D member 2	-0.84657	0.041975
KCNJ8	3764	potassium inwardly rectifying channel subfamily J member 8	-0.916583	0.0196488
KCTD11	147040	potassium channel tetramerization domain containing 11	-0.352297	0.00899206
KDELR3	11015	KDEL endoplasmic reticulum protein retention receptor 3	-0.53958	0.00298264
KIAA0319	9856	KIAA0319	1.12138	0.0426275
KIAA0319L	79932	KIAA0319 like	0.420176	0.0051445
KIF11	3832	kinesin family member 11	-0.557214	0.0233992
KIF14	9928	kinesin family member 14	-1.03706	0.0159389
KIF4A	24137	kinesin family member 4A	-1.38086	0.0217241
KLHL24	54800	kelch like family member 24	0.427151	0.0391371
KRT10	3858	keratin 10	-0.313152	0.0221329
KRT7	3855	keratin 7	-1.39182	0.0023641
KRTCAP2	200185	keratinocyte associated protein 2	-0.283332	0.0140429
LAMC2	3918	laminin subunit gamma 2	-0.559461	0.0114354
LARGE1	9215	LARGE xylosyl- and glucuronyltransferase 1	0.440305	0.0298161
LCOR	84458	ligand dependent nuclear receptor corepressor	0.776195	0.00258701
LDHA	3939	lactate dehydrogenase A	-0.450791	0.00236257
LDOC1	23641	LDOC1 regulator of NFKB signaling	-0.301497	0.045241
LGALS1	3956	galectin 1	-0.284297	0.0048497
LIMA1	51474	LIM domain and actin binding 1	-0.486037	0.0361582
LIMK1	3984	LIM domain kinase 1	0.266912	0.0222304
LIMS4	100288695	LIM zinc finger domain containing 4	0.44007	0.0363022
LINC00702	100652988	long intergenic non-protein coding RNA 702	-1.44927	0.00945161
LINC00968	100507632	long intergenic non-protein coding RNA 968	-1.32357	0.0187685
LINC01119	100134259	long intergenic non-protein coding RNA 1119	-0.671412	0.0283964
LINC01133	100505633	long intergenic non-protein coding RNA 1133	-0.732877	0.00450903
LMAN1	3998	lectin, mannose binding 1	-0.361944	0.0154234
LNPK	80856	lunapark, ER junction formation factor	-0.256491	0.0404832
LONRF2	164832	LON peptidase N-terminal domain and ring finger 2	1.17787	0.0180958
LOX	4015	lysyl oxidase	-0.41155	0.00141237
LOXL2	4017	lysyl oxidase like 2	-0.570561	0.00283718
LOXL3	84695	lysyl oxidase like 3	-0.533357	0.0348699
LPIN1	23175	lipin 1	0.65835	0.00018383
LRP4	4038	LDL receptor related protein 4	0.55292	0.00622491
LRRC8D	55144	leucine rich repeat containing 8 VRAC subunit D	-0.340492	0.0305286
LSM11	134353	LSM11, U7 small nuclear RNA associated	-0.394216	0.0139071
LSS	4047	lanosterol synthase	0.581149	0.00794761
LUCAT1	100505994	lung cancer associated transcript 1	0.643637	0.0200015
LXN	56925	latexin	-0.624106	0.0408384
LYNX1	66004	Ly6/neurotoxin 1	0.342891	0.0184475
LYRM2	57226	LYR motif containing 2	0.261019	0.0491421
LZTS3	9762	leucine zipper tumor suppressor family member 3	0.413471	0.0106733
MACROD1	28992	mono-ADP ribosylhydrolase 1	-0.46272	0.0485422
MAGED2	10916	MAGE family member D2	-0.264562	0.0218594
MAGED4B	81557	MAGE family member D4B	-0.546044	0.0171325
MAPKAP1	79109	MAPK associated protein 1	0.310508	0.0281051
MASP1	5648	mannan binding lectin serine peptidase 1	-0.644113	0.0417188
MB21D2	151963	Mab-21 domain containing 2	-0.730689	0.00685715
MBNL2	10150	muscleblind like splicing regulator 2	-0.254429	0.0482601
MBTD1	54799	mbt domain containing 1	-0.416693	0.0297015
MCM10	55388	minichromosome maintenance 10 replication initiation factor	-1.73693	0.00706156
MCM6	4175	minichromosome maintenance complex component 6	-0.447153	0.0155764
MDFI	4188	MyoD family inhibitor	-0.95279	0.0045031
ME1	4199	malic enzyme 1	0.35836	0.0442546
MELK	9833	maternal embryonic leucine zipper kinase	-0.477966	0.0492584
METTL26	84326	methyltransferase like 26	-0.398693	0.00212162
MFAP5	8076	microfibril associated protein 5	-0.694569	4.31529e-05
MFSD11	79157	major facilitator superfamily domain containing 11	0.318597	0.0325173
MFSD13A	79847	major facilitator superfamily domain containing 13A	0.913066	0.0137016
MHENCR	100505771	melanoma highly expressed competing endogenous lncRNA for miR-425 and miR-489	0.899028	0.016447
MIF	4282	macrophage migration inhibitory factor	-0.361448	0.00143676
MIR210HG	100506211	MIR210 host gene	-0.622602	0.0351933
MLPH	79083	melanophilin	0.326336	0.0431081
MMAB	326625	metabolism of cobalamin associated B	0.497749	0.0350927
MMP14	4323	matrix metallopeptidase 14	0.302309	0.0267284
MMP15	4324	matrix metallopeptidase 15	0.576366	0.0121671
MMP23B	8510	matrix metallopeptidase 23B	-0.799368	0.0393476
MRPL17	63875	mitochondrial ribosomal protein L17	-0.280028	0.0264972
MRPL35	51318	mitochondrial ribosomal protein L35	0.346099	0.0195008
MRPS31P5	100887750	mitochondrial ribosomal protein S31 pseudogene 5	0.983433	0.024532
MRPS34	65993	mitochondrial ribosomal protein S34	-0.270431	0.0180935
MSMO1	6307	methylsterol monooxygenase 1	0.604755	0.00894731
MT1G	4495	metallothionein 1G	-2.27558	0.00956118
MT1H	4496	metallothionein 1H	-1.59626	0.0325439
MT1L	4500	metallothionein 1L, pseudogene	-0.516787	0.0227293
MT1M	4499	metallothionein 1M	-1.98995	0.0297799
MT1X	4501	metallothionein 1X	-0.913707	0.0387167
MTERF4	130916	mitochondrial transcription termination factor 4	-0.332832	0.0402136
MTHFR	4524	methylenetetrahydrofolate reductase	0.503641	0.0182811
MTMR4	9110	myotubularin related protein 4	-0.353897	0.0271743
MTSS1	9788	MTSS I-BAR domain containing 1	0.546439	0.0411918
MVD	4597	mevalonate diphosphate decarboxylase	0.494122	0.0310458
MYADM	91663	myeloid associated differentiation marker	-0.422887	0.0114387
MYBL2	4605	MYB proto-oncogene like 2	-1.57585	0.00318467
MYCT1	80177	MYC target 1	-0.98973	0.00386825
MYLK	4638	myosin light chain kinase	0.55438	0.00776768
NATD1	256302	N-acetyltransferase domain containing 1	0.250974	0.0486967
NAXD	55739	NAD(P)HX dehydratase	-0.272786	0.0138066
NBEAL2	23218	neurobeachin like 2	-0.860491	0.0453557
NBPF19	101060226	NBPF member 19	0.503612	0.00141651
NCAPG	64151	non-SMC condensin I complex subunit G	-0.867315	0.0287224
NCAPH	23397	non-SMC condensin I complex subunit H	-1.34549	0.0186382
NCEH1	57552	neutral cholesterol ester hydrolase 1	-0.407225	0.0267135
NCKAP5	344148	NCK associated protein 5	-0.749497	0.04569
NCOA6	23054	nuclear receptor coactivator 6	0.305253	0.0345851
NDRG4	65009	NDRG family member 4	0.606708	0.0361759
NDUFA4L2	56901	NDUFA4 mitochondrial complex associated like 2	-0.810435	0.0046468
NEGR1	257194	neuronal growth regulator 1	-0.562843	0.0217921
NEK7	140609	NIMA related kinase 7	-0.502595	0.0040262
NEU1	4758	neuraminidase 1	0.380731	0.0215997
NF1	4763	neurofibromin 1	0.410601	0.0132121
NFATC2	4773	nuclear factor of activated T cells 2	-1.23609	0.0251518
NFKBIA	4792	NFKB inhibitor alpha	0.360348	0.0353655
NFKBIZ	64332	NFKB inhibitor zeta	0.487666	0.0292358
NHSL2	340527	NHS like 2	0.872053	0.0350467
NMNAT2	23057	nicotinamide nucleotide adenylyltransferase 2	-0.581706	0.0468038
NPC1	4864	NPC intracellular cholesterol transporter 1	0.444885	0.012678
NPTXR	23467	neuronal pentraxin receptor	0.658893	0.0145983
NR2F6	2063	nuclear receptor subfamily 2 group F member 6	-0.269842	0.031198
NRCAM	4897	neuronal cell adhesion molecule	0.569941	0.0420035
NSMAF	8439	neutral sphingomyelinase activation associated factor	0.412952	0.0175632
NTM	50863	neurotrimin	-0.477315	0.0424317
NUP205	23165	nucleoporin 205	-0.343083	0.0136106
NUSAP1	51203	nucleolar and spindle associated protein 1	-0.928457	0.0487012
ODF2	4957	outer dense fiber of sperm tails 2	-0.472179	0.00288882
OMA1	115209	OMA1 zinc metallopeptidase	0.416818	0.0306849
ORC1	4998	origin recognition complex subunit 1	-0.895702	0.0163086
OSBPL2	9885	oxysterol binding protein like 2	-0.348218	0.00765258
OST4	100128731	oligosaccharyltransferase complex subunit 4, non-catalytic	-0.340875	0.00599407
OSTC	58505	oligosaccharyltransferase complex non-catalytic subunit	-0.322529	0.00698283
P2RX4	5025	purinergic receptor P2X 4	0.359579	0.0480293
P4HA1	5033	prolyl 4-hydroxylase subunit alpha 1	-0.577329	0.00280542
P4HA2	8974	prolyl 4-hydroxylase subunit alpha 2	-0.373692	0.0050273
P4HB	5034	prolyl 4-hydroxylase subunit beta	-0.287677	0.00768978
PAFAH1B3	5050	platelet activating factor acetylhydrolase 1b catalytic subunit 3	0.498332	0.0368653
PAICS	10606	phosphoribosylaminoimidazole carboxylase and phosphoribosylaminoimidazolesuccinocarboxamide synthase	-0.314441	0.0110973
PAPSS2	9060	3'-phosphoadenosine 5'-phosphosulfate synthase 2	-0.260657	0.0278209
PAQR4	124222	progestin and adipoQ receptor family member 4	-0.784088	0.0149504
PARP2	10038	poly(ADP-ribose) polymerase 2	-0.442435	0.00928131
PBK	55872	PDZ binding kinase	-1.28817	0.00995204
PCDH10	57575	protocadherin 10	-0.617047	0.00188949
PCOLCE	5118	procollagen C-endopeptidase enhancer	-0.255267	0.0275652
PCSK9	255738	proprotein convertase subtilisin/kexin type 9	0.726006	0.0064409
PCYT2	5833	phosphate cytidylyltransferase 2, ethanolamine	0.614068	0.00593508
PDCD1LG2	80380	programmed cell death 1 ligand 2	-1.12212	0.00106209
PDE3A	5139	phosphodiesterase 3A	-1.27642	0.00323226
PDE7B	27115	phosphodiesterase 7B	-0.509656	0.0472453
PDLIM2	64236	PDZ and LIM domain 2	-0.370074	0.00674722
PDP2	57546	pyruvate dehyrogenase phosphatase catalytic subunit 2	0.442164	0.0380034
PENK	5179	proenkephalin	-1.1026	0.0121264
PEX1	5189	peroxisomal biogenesis factor 1	0.343078	0.0199462
PFKFB2	5208	6-phosphofructo-2-kinase/fructose-2,6-biphosphatase 2	0.588164	0.00968174
PFKFB3	5209	6-phosphofructo-2-kinase/fructose-2,6-biphosphatase 3	-0.435162	0.0364644
PFKP	5214	phosphofructokinase, platelet	-0.299715	0.00830341
PGAM1	5223	phosphoglycerate mutase 1	-0.328463	0.00965949
PGD	5226	phosphogluconate dehydrogenase	0.295134	0.0278836
PGK1	5230	phosphoglycerate kinase 1	-0.40555	0.00742824
PHC1	1911	polyhomeotic homolog 1	0.600927	0.000188548
PHETA2	150368	PH domain containing endocytic trafficking adaptor 2	-0.569606	0.00391542
PHF7	51533	PHD finger protein 7	0.782181	0.0416737
PI16	221476	peptidase inhibitor 16	-0.931515	0.0340437
PIGO	84720	phosphatidylinositol glycan anchor biosynthesis class O	0.309714	0.0438805
PIGU	128869	phosphatidylinositol glycan anchor biosynthesis class U	-0.384082	0.0359746
PIH1D1	55011	PIH1 domain containing 1	-0.443894	0.0170846
PIK3C3	5289	phosphatidylinositol 3-kinase catalytic subunit type 3	-0.332083	0.0116571
PIK3IP1	113791	phosphoinositide-3-kinase interacting protein 1	0.344854	0.0435706
PIK3R3	8503	phosphoinositide-3-kinase regulatory subunit 3	0.704373	0.0189177
PIR	8544	pirin	0.418361	0.0293329
PLAGL1	5325	PLAG1 like zinc finger 1	-0.466264	0.0165515
PLD2	5338	phospholipase D2	0.325158	0.0398796
PLEKHG1	57480	pleckstrin homology and RhoGEF domain containing G1	0.921569	0.0422303
PLK1	5347	polo like kinase 1	-1.40716	0.00713072
PLK4	10733	polo like kinase 4	-1.1574	0.0499753
PLOD1	5351	procollagen-lysine,2-oxoglutarate 5-dioxygenase 1	-0.318897	0.00614785
PLOD2	5352	procollagen-lysine,2-oxoglutarate 5-dioxygenase 2	-0.809123	0.000197274
PLP2	5355	proteolipid protein 2	-0.352927	0.0013639
PLPP2	8612	phospholipid phosphatase 2	0.604531	0.00179666
PLXNA3	55558	plexin A3	-0.545337	0.0365542
PODXL	5420	podocalyxin like	-0.753025	0.00573699
POFUT2	23275	protein O-fucosyltransferase 2	-0.31881	0.00723395
POGLUT2	79070	protein O-glucosyltransferase 2	-0.377834	0.0275454
POLA2	23649	DNA polymerase alpha 2, accessory subunit	-0.806295	0.0233087
POLD1	5424	DNA polymerase delta 1, catalytic subunit	-0.56505	0.0231924
POLH	5429	DNA polymerase eta	0.460128	0.0159739
POLR3C	10623	RNA polymerase III subunit C	0.332829	0.0427795
POSTN	10631	periostin	-0.554627	0.00229587
PPAN	56342	peter pan homolog	-0.420417	0.0210444
PPP1R13L	10848	protein phosphatase 1 regulatory subunit 13 like	-0.461054	0.03889
PPP1R7	5510	protein phosphatase 1 regulatory subunit 7	0.267362	0.0430425
PPP2R5B	5526	protein phosphatase 2 regulatory subunit B'beta	-0.313834	0.0293185
PPP3CB-AS1	101929145	PPP3CB antisense RNA 1 (head to head)	1.01102	0.0318471
PRELID2	153768	PRELI domain containing 2	-1.20131	0.0109116
PRKAR2A	5576	protein kinase cAMP-dependent type II regulatory subunit alpha	0.251792	0.0101258
PRXL2A	84293	peroxiredoxin like 2A	0.969583	0.00489514
PTCD1	26024	pentatricopeptide repeat domain 1	-0.470273	0.0259752
PTGS1	5742	prostaglandin-endoperoxide synthase 1	-0.528563	0.00757983
PTK2B	2185	protein tyrosine kinase 2 beta	1.36473	0.0123319
PTPRF	5792	protein tyrosine phosphatase receptor type F	-0.434611	0.0206201
PYCR1	5831	pyrroline-5-carboxylate reductase 1	-0.477527	0.00139469
PYGL	5836	glycogen phosphorylase L	-0.382654	0.0231297
QPRT	23475	quinolinate phosphoribosyltransferase	0.886292	0.0055319
R3HCC1L	27291	R3H domain and coiled-coil containing 1 like	-0.387201	0.0445873
RAB27B	5874	RAB27B, member RAS oncogene family	0.869339	0.0483135
RAB30	27314	RAB30, member RAS oncogene family	0.548149	0.00525982
RAB31	11031	RAB31, member RAS oncogene family	0.413636	0.03956
RAB4A	5867	RAB4A, member RAS oncogene family	-0.327746	0.0497674
RAB4B	53916	RAB4B, member RAS oncogene family	0.306671	0.0494363
RACGAP1	29127	Rac GTPase activating protein 1	-0.449604	0.0176229
RAD51AP1	10635	RAD51 associated protein 1	-1.05043	0.0473186
RAPGEF1	2889	Rap guanine nucleotide exchange factor 1	0.423723	0.00781877
RARRES2	5919	retinoic acid receptor responder 2	-1.01747	0.0161175
RASIP1	54922	Ras interacting protein 1	-0.526536	0.034502
RASL10B	91608	RAS like family 10 member B	1.28104	0.0321008
RASSF1	11186	Ras association domain family member 1	-0.485979	0.0144381
RASSF2	9770	Ras association domain family member 2	-1.18108	0.00786759
RASSF7	8045	Ras association domain family member 7	-0.941624	0.0229805
RBM14-RBM4	100526737	RBM14-RBM4 readthrough	-1.22177	0.0400063
RBM26	64062	RNA binding motif protein 26	-0.258222	0.0428434
RBM39	9584	RNA binding motif protein 39	-0.321121	0.0217512
RBX1	9978	ring-box 1	-0.287423	0.0394034
RCAN1	1827	regulator of calcineurin 1	-0.572277	0.04505
RCHY1	25898	ring finger and CHY zinc finger domain containing 1	-0.365222	0.0414712
RCN3	57333	reticulocalbin 3	-0.334603	0.0144581
RENBP	5973	renin binding protein	0.915924	0.0435336
REXO2	25996	RNA exonuclease 2	-0.280316	0.021854
RGMB	285704	repulsive guidance molecule BMP co-receptor b	-0.316425	0.0114613
RGPD8	727851	RANBP2 like and GRIP domain containing 8	-0.438953	0.0174045
RHCG	51458	Rh family C glycoprotein	1.18104	0.039949
RNA5-8SN2	109864281	RNA, 5.8S ribosomal N2	-0.853154	0.0011992
RNF122	79845	ring finger protein 122	-0.472235	0.0295907
RNF128	79589	ring finger protein 128	0.524367	0.0376893
RNF152	220441	ring finger protein 152	-0.8241	0.0137573
RPARP-AS1	100505761	RPARP antisense RNA 1	1.02916	0.0160808
RPL10	6134	ribosomal protein L10	-0.256559	0.0351923
RPL11	6135	ribosomal protein L11	-0.293867	0.00395625
RPL18A	6142	ribosomal protein L18a	-0.343081	0.0193437
RPL23	9349	ribosomal protein L23	-0.29748	0.0433128
RPL23AP42	647099	ribosomal protein L23a pseudogene 42	-0.336069	0.00763872
RPL29	6159	ribosomal protein L29	-0.298177	0.0359998
RPL30	6156	ribosomal protein L30	-0.271726	0.0149281
RPL31	6160	ribosomal protein L31	-0.329334	0.00403044
RPL32	6161	ribosomal protein L32	-0.25458	0.045845
RPL32P3	132241	ribosomal protein L32 pseudogene 3	1.40807	0.0167768
RPL35	11224	ribosomal protein L35	-0.322606	0.00752477
RPL39	6170	ribosomal protein L39	-0.29452	0.0415032
RPLP2	6181	ribosomal protein lateral stalk subunit P2	-0.274422	0.0122946
RPS11	6205	ribosomal protein S11	-0.296566	0.0177754
RPS12	6206	ribosomal protein S12	-0.27537	0.0265701
RPS13	6207	ribosomal protein S13	-0.259337	0.0272546
RPS16	6217	ribosomal protein S16	-0.26856	0.0160198
RPS17	6218	ribosomal protein S17	-0.319881	0.00788105
RPS18	6222	ribosomal protein S18	-0.306699	0.0172639
RPS27	6232	ribosomal protein S27	-0.39832	0.00510156
RPS28P7	646195	ribosomal protein S28 pseudogene 7	-0.494201	0.030744
RPS29	6235	ribosomal protein S29	-0.345649	0.0153062
RPS2P5	100130562	ribosomal protein S2 pseudogene 5	-0.324435	0.00358324
RPS4X	6191	ribosomal protein S4 X-linked	-0.261498	0.0354377
RPS8	6202	ribosomal protein S8	-0.262755	0.0266972
RRAGB	10325	Ras related GTP binding B	0.47088	0.0170809
RRAS2	22800	RAS related 2	-0.287926	0.0449196
RRM2	6241	ribonucleotide reductase regulatory subunit M2	-0.986184	0.0136023
RTF1	23168	RTF1 homolog, Paf1/RNA polymerase II complex component	0.283059	0.0477849
RUVBL2	10856	RuvB like AAA ATPase 2	-0.338388	0.014938
S100A10	6281	S100 calcium binding protein A10	-0.466892	0.0107368
S100A6	6277	S100 calcium binding protein A6	-0.254483	0.0443502
SARM1	23098	sterile alpha and TIR motif containing 1	0.418389	0.0244524
SC5D	6309	sterol-C5-desaturase	0.446874	0.0463079
SCD	6319	stearoyl-CoA desaturase	0.806567	0.0146476
SDR39U1	56948	short chain dehydrogenase/reductase family 39U member 1	0.329271	0.0424195
SEC13	6396	SEC13 homolog, nuclear pore and COPII coat complex component	-0.290751	0.0200234
SEC23A	10484	Sec23 homolog A, coat complex II component	-0.266763	0.0362809
SEC24D	9871	SEC24 homolog D, COPII coat complex component	-0.303417	0.0299688
SEC61B	10952	SEC61 translocon beta subunit	-0.40609	0.00143112
SEC61G	23480	SEC61 translocon gamma subunit	-0.327091	0.0113558
SECTM1	6398	secreted and transmembrane 1	-0.809146	0.0333759
SELENOW	6415	selenoprotein W	-0.29229	0.0142405
SERPINA3	12	serpin family A member 3	-0.564641	0.0132639
SERPINE1	5054	serpin family E member 1	-0.365229	0.0117781
SERPINE2	5270	serpin family E member 2	-0.564325	0.00375275
SERPINH1	871	serpin family H member 1	-0.424401	0.0032954
SH2D2A	9047	SH2 domain containing 2A	-1.45427	0.00222477
SH2D4A	63898	SH2 domain containing 4A	-0.443559	0.0239314
SH3PXD2B	285590	SH3 and PX domains 2B	0.339538	0.0301478
SHCBP1	79801	SHC binding and spindle associated 1	-1.0551	0.0322434
SIAH2	6478	siah E3 ubiquitin protein ligase 2	-0.326381	0.0253993
SLC16A1	6566	solute carrier family 16 member 1	-0.3265	0.0173621
SLC16A3	9123	solute carrier family 16 member 3	-0.355023	0.0054418
SLC17A9	63910	solute carrier family 17 member 9	-0.696242	0.0301578
SLC22A17	51310	solute carrier family 22 member 17	-0.359182	0.0321839
SLC2A1	6513	solute carrier family 2 member 1	-0.415394	0.0413843
SLC2A3	6515	solute carrier family 2 member 3	-0.432955	0.0127852
SLC2A6	11182	solute carrier family 2 member 6	0.464941	0.0326713
SLC35B3	51000	solute carrier family 35 member B3	-0.266508	0.0424612
SLC37A1	54020	solute carrier family 37 member 1	1.52687	0.0263681
SLC38A5	92745	solute carrier family 38 member 5	-0.779854	4.89906e-05
SLC40A1	30061	solute carrier family 40 member 1	0.925158	0.0284513
SLC41A2	84102	solute carrier family 41 member 2	0.400002	0.0447824
SLC7A2	6542	solute carrier family 7 member 2	0.633993	0.042777
SLC7A8	23428	solute carrier family 7 member 8	0.898798	0.0170435
SLC8A1	6546	solute carrier family 8 member A1	-0.938346	0.0289818
SLC9A3-AS1	100288152	SLC9A3 antisense RNA 1	0.465413	0.0457288
SLFN11	91607	schlafen family member 11	-0.41294	0.0128116
SMC5	23137	structural maintenance of chromosomes 5	-0.403809	0.0079297
SMG1P4	100507526	SMG1 pseudogene 4	2.33075	0.0309666
SMIM4	440957	small integral membrane protein 4	0.483948	0.0457597
SMPD4	55627	sphingomyelin phosphodiesterase 4	-0.288246	0.0266547
SMURF2	64750	SMAD specific E3 ubiquitin protein ligase 2	-0.341072	0.0462943
SNAPC1	6617	small nuclear RNA activating complex polypeptide 1	-0.399852	0.00834218
SNED1	25992	sushi, nidogen and EGF like domains 1	0.433858	0.0393566
SNN	8303	stannin	0.392465	0.0214755
SNU13	4809	small nuclear ribonucleoprotein 13	-0.27991	0.0324287
SNX30	401548	sorting nexin family member 30	0.411059	0.0383008
SNX8	29886	sorting nexin 8	0.377531	0.0379506
SNX9	51429	sorting nexin 9	0.266494	0.037024
SOCS3	9021	suppressor of cytokine signaling 3	0.563866	0.0436856
SOD2	6648	superoxide dismutase 2	0.798824	0.00568632
SORT1	6272	sortilin 1	0.679869	0.0164059
SOST	50964	sclerostin	-1.24076	0.0218053
SOX5	6660	SRY-box transcription factor 5	0.870385	0.0497956
SPARC	6678	secreted protein acidic and cysteine rich	-0.715847	0.00175453
SPDL1	54908	spindle apparatus coiled-coil protein 1	-0.642753	0.00248649
SPRY1	10252	sprouty RTK signaling antagonist 1	-0.748128	0.0273226
SQLE	6713	squalene epoxidase	0.365991	0.0319231
SQSTM1	8878	sequestosome 1	0.383062	0.0386364
SREBF2	6721	sterol regulatory element binding transcription factor 2	0.376537	0.00206186
SRM	6723	spermidine synthase	-0.421481	0.0100858
SRR	63826	serine racemase	0.599328	0.00427326
SSR3	6747	signal sequence receptor subunit 3	-0.289348	0.0220331
SSR4	6748	signal sequence receptor subunit 4	-0.277794	0.0121199
SSTR1	6751	somatostatin receptor 1	-0.898707	0.0226752
ST7	7982	suppression of tumorigenicity 7	-0.256614	0.0466082
STARD13	90627	StAR related lipid transfer domain containing 13	-0.44736	0.0475946
STIM1	6786	stromal interaction molecule 1	0.456951	0.00864468
STRIP2	57464	striatin interacting protein 2	0.719037	0.0161777
STX17	55014	syntaxin 17	0.65478	0.00201004
SULF1	23213	sulfatase 1	-0.730163	0.00659983
SULT1B1	27284	sulfotransferase family 1B member 1	-0.95784	0.000974229
SULT1E1	6783	sulfotransferase family 1E member 1	-1.7077	0.000197672
SVEP1	79987	sushi, von Willebrand factor type A, EGF and pentraxin domain containing 1	-0.487647	0.0100149
SVIL	6840	supervillin	0.397366	0.0119075
SYF2	25949	SYF2 pre-mRNA splicing factor	0.254256	0.0451644
SYNPO	11346	synaptopodin	-0.871637	0.00182093
SYT14	255928	synaptotagmin 14	0.874905	0.0455777
TAC1	6863	tachykinin precursor 1	1.04407	0.00613823
TADA2A	6871	transcriptional adaptor 2A	-0.425804	0.0464484
TAGLN	6876	transgelin	-1.19887	9.37625e-06
TANC2	26115	tetratricopeptide repeat, ankyrin repeat and coiled-coil containing 2	-0.688692	0.0118218
TANGO6	79613	transport and golgi organization 6 homolog	0.505477	0.00212
TBC1D8B	54885	TBC1 domain family member 8B	-0.288153	0.040543
TBL2	26608	transducin beta like 2	-0.339625	0.00618845
TCAF2	285966	TRPM8 channel associated factor 2	-0.547313	0.0159401
TCF19	6941	transcription factor 19	-0.9544	0.0188874
TCF7	6932	transcription factor 7	0.953416	0.00864254
TDG	6996	thymine DNA glycosylase	-0.444806	0.00515339
TDRKH	11022	tudor and KH domain containing	0.933851	0.00249213
TEK	7010	TEK receptor tyrosine kinase	-0.556871	0.00883658
TERF1	7013	telomeric repeat binding factor 1	-0.360868	0.0187915
TES	26136	testin LIM domain protein	-0.368789	0.0320725
TET2	54790	tet methylcytosine dioxygenase 2	-0.367237	0.0461127
TFPI2	7980	tissue factor pathway inhibitor 2	-0.53672	0.0451469
TGFB1I1	7041	transforming growth factor beta 1 induced transcript 1	-0.344179	0.00528879
THBS1	7057	thrombospondin 1	-1.33649	0.0052256
THY1	7070	Thy-1 cell surface antigen	-0.429258	0.00306678
TIMP1	7076	TIMP metallopeptidase inhibitor 1	-0.428983	0.00373359
TIMP3	7078	TIMP metallopeptidase inhibitor 3	-0.986564	0.00256736
TK1	7083	thymidine kinase 1	-1.032	0.0482138
TMEM121	80757	transmembrane protein 121	-0.660514	0.0387365
TMEM167B	56900	transmembrane protein 167B	-0.259095	0.0375849
TMEM214	54867	transmembrane protein 214	-0.254054	0.0449907
TMEM216	51259	transmembrane protein 216	-0.567187	0.0370273
TMEM258	746	transmembrane protein 258	-0.363304	0.00619383
TMEM39A	55254	transmembrane protein 39A	-0.376835	0.020789
TMEM45A	55076	transmembrane protein 45A	-0.498418	0.0029837
TMEM63B	55362	transmembrane protein 63B	0.292195	0.0472285
TMEM97	27346	transmembrane protein 97	1.23126	0.00197346
TMEM99	147184	transmembrane protein 99 (putative)	-0.373657	0.0376724
TNC	3371	tenascin C	-0.743044	0.0232262
TNFAIP8	25816	TNF alpha induced protein 8	0.523307	0.0488023
TNFAIP8L3	388121	TNF alpha induced protein 8 like 3	0.442641	0.0322853
TNFRSF14	8764	TNF receptor superfamily member 14	0.758907	0.0169714
TNIK	23043	TRAF2 and NCK interacting kinase	0.812587	0.00262942
TNNT1	7138	troponin T1, slow skeletal type	-0.550729	0.0345343
TNXB	7148	tenascin XB	-1.33412	0.0151147
TOGARAM1	23116	TOG array regulator of axonemal microtubules 1	0.426993	0.0273625
TOMM34	10953	translocase of outer mitochondrial membrane 34	0.310166	0.0343077
TOP2A	7153	DNA topoisomerase II alpha	-1.27517	0.0169382
TP53INP1	94241	tumor protein p53 inducible nuclear protein 1	0.573688	0.00198214
TP53INP2	58476	tumor protein p53 inducible nuclear protein 2	0.372443	0.046219
TPI1	7167	triosephosphate isomerase 1	-0.34002	0.0109474
TPM1	7168	tropomyosin 1	-0.389838	0.0375992
TPX2	22974	TPX2 microtubule nucleation factor	-0.666649	0.0393699
TRAPPC1	58485	trafficking protein particle complex 1	-0.278409	0.0340713
TRBC2	28638	T cell receptor beta constant 2	-1.01819	0.0131182
TRIB1	10221	tribbles pseudokinase 1	0.300856	0.0459609
TRNAU1AP	54952	tRNA selenocysteine 1 associated protein 1	-0.385869	0.0124555
TRPV2	51393	transient receptor potential cation channel subfamily V member 2	0.620072	0.0112612
TSNARE1	203062	t-SNARE domain containing 1	0.605158	0.0185023
TSPAN13	27075	tetraspanin 13	-0.512609	0.0255443
TSPAN8	7103	tetraspanin 8	-0.727474	0.00411442
TSPO	706	translocator protein	-0.318255	0.00194875
TSTA3	7264	tissue specific transplantation antigen P35B	-0.40065	0.0153111
TUBA1B	10376	tubulin alpha 1b	-0.616329	0.00954853
TUBA1C	84790	tubulin alpha 1c	-0.338157	0.0298919
TUBB	203068	tubulin beta class I	-0.329159	0.0321042
TUBB2A	7280	tubulin beta 2A class IIa	-0.406397	0.0475419
TUBB4B	10383	tubulin beta 4B class IVb	-0.552642	0.0138464
TUBB6	84617	tubulin beta 6 class V	-0.407453	0.012605
TUBG2	27175	tubulin gamma 2	-0.487357	0.0351154
TUBGCP2	10844	tubulin gamma complex associated protein 2	-0.39571	0.0468992
TUFT1	7286	tuftelin 1	-0.60087	0.0146149
TULP4	56995	TUB like protein 4	0.533844	0.000601272
UAP1	6675	UDP-N-acetylglucosamine pyrophosphorylase 1	-0.335794	0.0269184
UBE2C	11065	ubiquitin conjugating enzyme E2 C	-1.25851	0.0178669
UCKL1	54963	uridine-cytidine kinase 1 like 1	-0.337471	0.0205424
UGP2	7360	UDP-glucose pyrophosphorylase 2	-0.316166	0.0315533
UHRF1	29128	ubiquitin like with PHD and ring finger domains 1	-0.884452	0.0192308
ULBP2	80328	UL16 binding protein 2	-0.356622	0.0246149
UPF1	5976	UPF1 RNA helicase and ATPase	-0.255142	0.0359441
USP18	11274	ubiquitin specific peptidase 18	-1.2751	0.0337484
UST	10090	uronyl 2-sulfotransferase	0.536576	0.00465108
UTRN	7402	utrophin	-0.445154	0.0206152
VARS1	7407	valyl-tRNA synthetase 1	-0.398253	0.00692364
VAV2	7410	vav guanine nucleotide exchange factor 2	-0.340073	0.0044976
VEGFA	7422	vascular endothelial growth factor A	-0.323853	0.0122263
VEGFC	7424	vascular endothelial growth factor C	-0.266086	0.0171241
VEPH1	79674	ventricular zone expressed PH domain containing 1	-0.594183	0.00822674
VGLL3	389136	vestigial like family member 3	-0.604507	0.0278173
VKORC1	79001	vitamin K epoxide reductase complex subunit 1	-0.293737	0.00398036
VPS13A	23230	vacuolar protein sorting 13 homolog A	-0.409302	0.0273685
VPS33B	26276	VPS33B late endosome and lysosome associated	-0.403501	0.0471949
VSIR	64115	V-set immunoregulatory receptor	-0.795786	0.0238971
VTI1A	143187	vesicle transport through interaction with t-SNAREs 1A	0.319981	0.0285494
WBP2	23558	WW domain binding protein 2	0.313077	0.0383604
WDR44	54521	WD repeat domain 44	-0.28427	0.0463593
WDR54	84058	WD repeat domain 54	-0.382122	0.0218249
WDR66	144406	WD repeat domain 66	-0.664067	0.0402236
WDR78	79819	WD repeat domain 78	0.884772	0.0463914
WEE1	7465	WEE1 G2 checkpoint kinase	0.410227	0.0237511
WNK4	65266	WNK lysine deficient protein kinase 4	-1.13808	0.00176302
WT1-AS	51352	WT1 antisense RNA	1.70568	0.00489265
YEATS2	55689	YEATS domain containing 2	-0.3654	0.00178942
YIF1A	10897	Yip1 interacting factor homolog A, membrane trafficking protein	-0.372012	0.0147064
YIF1B	90522	Yip1 interacting factor homolog B, membrane trafficking protein	-0.465523	0.00276468
YIPF2	78992	Yip1 domain family member 2	-0.263044	0.0272271
ZCCHC8	55596	zinc finger CCHC-type containing 8	-0.491481	0.0191993
ZDHHC14	79683	zinc finger DHHC-type containing 14	0.718439	0.0125896
ZEB1-AS1	220930	ZEB1 antisense RNA 1	0.973994	0.0128952
ZFP30	22835	ZFP30 zinc finger protein	-0.492818	0.0475677
ZFPM2	23414	zinc finger protein, FOG family member 2	-0.364898	0.0482873
ZMIZ1-AS1	283050	ZMIZ1 antisense RNA 1	0.691132	0.0451712
ZNF185	7739	zinc finger protein 185 with LIM domain	-0.669006	0.000191428
ZNF202	7753	zinc finger protein 202	-0.410783	0.0473124
ZNF235	9310	zinc finger protein 235	0.727568	0.0323387
ZNF267	10308	zinc finger protein 267	0.629982	0.028913
ZNF320	162967	zinc finger protein 320	0.440633	0.0168529
ZNF343	79175	zinc finger protein 343	-0.458082	0.0270622
ZNF346	23567	zinc finger protein 346	-0.414524	0.0285722
ZNF516	9658	zinc finger protein 516	0.615282	0.00945444
ZNF576	79177	zinc finger protein 576	-0.342637	0.0305036
ZNF672	79894	zinc finger protein 672	-0.291007	0.0131369
ZNF774	342132	zinc finger protein 774	1.21846	0.0289287
ZPLD1	131368	zona pellucida like domain containing 1	-1.39026	0.0469769

## Sheet: ECs - Hypoxia vs Normoxia
SYMBOL	ENTREZID	GENENAME	logFC	PValue
AASS	10157	aminoadipate-semialdehyde synthase	-0.726706	0.0447958
ABLIM1	3983	actin binding LIM protein 1	0.758137	0.0473891
ACADSB	36	acyl-CoA dehydrogenase short/branched chain	-1.9345	0.000434823
ACTR3B	57180	actin related protein 3B	-0.622064	0.0420161
ADAM10	102	ADAM metallopeptidase domain 10	-0.686521	0.00984702
ADCY4	196883	adenylate cyclase 4	-0.57381	0.0407485
ADGRG1	9289	adhesion G protein-coupled receptor G1	-0.588466	0.031047
AHCYL2	23382	adenosylhomocysteinase like 2	-0.665242	0.0132337
AHSA1	10598	activator of HSP90 ATPase activity 1	0.367337	0.0183138
AKAP1	8165	A-kinase anchoring protein 1	-0.495617	0.0496156
ALKBH2	121642	alkB homolog 2, alpha-ketoglutarate dependent dioxygenase	0.389926	0.0479733
ANAPC4	29945	anaphase promoting complex subunit 4	-1.08655	0.00602096
ANKRD1	27063	ankyrin repeat domain 1	0.50937	0.0109575
ANKRD36	375248	ankyrin repeat domain 36	-1.32327	0.0161084
ANKRD50	57182	ankyrin repeat domain 50	-0.577984	0.0194641
ANKRD52	283373	ankyrin repeat domain 52	-0.594207	0.0368828
AP5Z1	9907	adaptor related protein complex 5 subunit zeta 1	-0.879998	0.0162725
APTX	54840	aprataxin	-0.710471	0.0333107
ARFGAP2	84364	ADP ribosylation factor GTPase activating protein 2	-0.531673	0.0192403
ARG2	384	arginase 2	-0.57389	0.0403544
ARHGAP45	23526	Rho GTPase activating protein 45	0.595235	0.0341249
ARHGDIG	398	Rho GDP dissociation inhibitor gamma	0.990387	0.0168249
ARID2	196528	AT-rich interaction domain 2	-1.03881	0.00214964
ARSL	415	arylsulfatase L	-1.95613	0.0456914
ASAP3	55616	ArfGAP with SH3 domain, ankyrin repeat and PH domain 3	-1.17916	0.0301151
ASMTL	8623	acetylserotonin O-methyltransferase like	-0.615286	0.020043
ATG9B	285973	autophagy related 9B	-2.01863	0.0439656
ATP2A3	489	ATPase sarcoplasmic/endoplasmic reticulum Ca2+ transporting 3	2.16132	0.00640975
ATP6V1E2	90423	ATPase H+ transporting V1 subunit E2	1.20065	0.0111965
ATR	545	ATR serine/threonine kinase	-0.875359	0.030255
AVL9	23080	AVL9 cell migration associated	-1.50738	0.000382278
AZI2	64343	5-azacytidine induced 2	0.708682	0.00593548
B4GALNT4	338707	beta-1,4-N-acetyl-galactosaminyltransferase 4	0.906826	0.0495801
BAG3	9531	BCL2 associated athanogene 3	0.725341	0.00126067
BATF3	55509	basic leucine zipper ATF-like transcription factor 3	0.648457	0.0346472
BCL2L15	440603	BCL2 like 15	1.47014	0.0388548
BNC1	646	basonuclin 1	0.512523	0.0129658
BPGM	669	bisphosphoglycerate mutase	0.423628	0.0458201
BSCL2	26580	BSCL2 lipid droplet biogenesis associated, seipin	-1.4182	0.000586521
BST2	684	bone marrow stromal cell antigen 2	0.732681	0.0123852
BTBD7P1	441548	BTB domain containing 7 pseudogene 1	1.30413	0.0346291
BTG2	7832	BTG anti-proliferation factor 2	-0.992068	0.0420916
BZW1P2	151579	basic leucine zipper and W2 domains 1 pseudogene 2	-8.73539	0.0207629
C17orf67	339210	chromosome 17 open reading frame 67	1.1581	0.019931
C19orf48	84798	chromosome 19 open reading frame 48	-0.477299	0.0410666
C1QTNF5	114902	C1q and TNF related 5	-0.855847	0.0499835
C1R	715	complement C1r	-1.71699	0.011474
C21orf58	54058	chromosome 21 open reading frame 58	-1.60093	0.0296718
C21orf62	56245	chromosome 21 open reading frame 62	0.686529	0.0473565
C2orf68	388969	chromosome 2 open reading frame 68	0.866111	0.0473391
C2orf88	84281	chromosome 2 open reading frame 88	1.0482	0.0213882
C5AR1	728	complement C5a receptor 1	-2.27042	0.0364708
CACNA1D	776	calcium voltage-gated channel subunit alpha1 D	1.01399	0.0145929
CACNG8	59283	calcium voltage-gated channel auxiliary subunit gamma 8	-0.829863	0.0155461
CAMKK1	84254	calcium/calmodulin dependent protein kinase kinase 1	0.635661	0.0179206
CAP2	10486	cyclase associated actin cytoskeleton regulatory protein 2	1.03107	0.0246172
CAPN15	6650	calpain 15	0.40632	0.0218544
CAPN5	726	calpain 5	-1.05377	0.0140379
CARS1	833	cysteinyl-tRNA synthetase 1	0.861661	0.00073786
CBR4	84869	carbonyl reductase 4	-1.31546	0.0199313
CBX8	57332	chromobox 8	1.54256	0.031993
CC2D1B	200014	coiled-coil and C2 domain containing 1B	-0.638168	0.0125153
CCDC115	84317	coiled-coil domain containing 115	-0.984546	0.044464
CCDC127	133957	coiled-coil domain containing 127	0.864033	0.0123674
CCDC62	84660	coiled-coil domain containing 62	-1.23237	0.0407939
CCDC91	55297	coiled-coil domain containing 91	0.961139	0.0440768
CCK	885	cholecystokinin	1.75988	0.0363663
CCNA1	8900	cyclin A1	0.512856	0.0393428
CD200	4345	CD200 molecule	1.73024	0.0365345
CD22	933	CD22 molecule	1.23902	0.0456546
CD55	1604	CD55 molecule (Cromer blood group)	0.572605	0.0242291
CDH4	1002	cadherin 4	0.775677	0.0301828
CDK9	1025	cyclin dependent kinase 9	0.897299	0.00376746
CDON	50937	cell adhesion associated, oncogene regulated	-3.07649	0.000315225
CDPF1	150383	cysteine rich DPF motif domain containing 1	-1.12459	0.0440122
CEMIP2	23670	cell migration inducing hyaluronidase 2	-0.764955	0.00758739
CENPV	201161	centromere protein V	0.340074	0.0439355
CEP152	22995	centrosomal protein 152	-0.999025	0.0349306
CEP290	80184	centrosomal protein 290	-1.21605	0.00328411
CFDP1	10428	craniofacial development protein 1	0.418474	0.0376779
CHP1	11261	calcineurin like EF-hand protein 1	0.424488	0.0184001
CHRFAM7A	89832	CHRNA7 (exons 5-10) and FAM7A (exons A-E) fusion	1.04518	0.0415193
CIDECP1	152302	cell death inducing DFFA like effector c pseudogene 1	0.489853	0.048308
CKAP5	9793	cytoskeleton associated protein 5	-0.669454	0.013012
CLEC16A	23274	C-type lectin domain containing 16A	-0.545646	0.0320607
CLMP	79827	CXADR like membrane protein	0.529098	0.0306573
CLPX	10845	caseinolytic mitochondrial matrix peptidase chaperone subunit	-0.638354	0.0178277
CMSS1	84319	cms1 ribosomal small subunit homolog	0.352273	0.0319224
CMTR1	23070	cap methyltransferase 1	-0.575775	0.0190384
CNN3	1266	calponin 3	0.37942	0.0335329
CNTN2	6900	contactin 2	1.40037	0.0222824
COA6	388753	cytochrome c oxidase assembly factor 6	0.592337	0.0453554
COLEC11	78989	collectin subfamily member 11	1.28629	0.0295061
COMT	1312	catechol-O-methyltransferase	0.405217	0.0404694
COPZ2	51226	coatomer protein complex subunit zeta 2	0.975453	0.0414255
CPLANE2	79363	ciliogenesis and planar polarity effector 2	-1.97818	0.0129544
CPNE1	8904	copine 1	0.393929	0.0284142
CPT1C	126129	carnitine palmitoyltransferase 1C	-0.530256	0.0393867
CRABP2	1382	cellular retinoic acid binding protein 2	0.5824	0.0317635
CRNKL1	51340	crooked neck pre-mRNA splicing factor 1	0.567396	0.0237065
CRTC1	23373	CREB regulated transcription coactivator 1	-0.733559	0.0452098
CRYBG1	202	crystallin beta-gamma domain containing 1	0.943549	0.00832069
CSRNP2	81566	cysteine and serine rich nuclear protein 2	-0.735486	0.0202801
CTDSP2	10106	CTD small phosphatase 2	-0.506756	0.0240666
CTPS2	56474	CTP synthase 2	0.917918	0.0324331
CUL3	8452	cullin 3	0.427361	0.0494103
CXXC1	30827	CXXC finger protein 1	-0.954755	0.00162366
CYB561	1534	cytochrome b561	-0.562939	0.0429476
CYB5D1	124637	cytochrome b5 domain containing 1	-0.767207	0.00192714
DALRD3	55152	DALR anticodon binding domain containing 3	-1.34354	0.00240198
DAPP1	27071	dual adaptor of phosphotyrosine and 3-phosphoinositides 1	1.97186	0.0145685
DCAF12	25853	DDB1 and CUL4 associated factor 12	0.480054	0.037252
DDN	23109	dendrin	0.733809	0.0421117
DDX10	1662	DEAD-box helicase 10	0.4385	0.0158922
DDX11	1663	DEAD/H-box helicase 11	-1.11411	0.00131155
DENND4A	10260	DENN domain containing 4A	-0.771176	0.00629428
DERPC	113455421	DERPC proline and glycine rich nuclear protein	1.29081	0.0371214
DFFBP1	100422581	DNA fragmentation factor subunit beta pseudogene 1	-2.15858	0.0118245
DGCR8	54487	DGCR8 microprocessor complex subunit	-0.427432	0.0284697
DHODH	1723	dihydroorotate dehydrogenase (quinone)	-0.963012	0.0316291
DIAPH3	81624	diaphanous related formin 3	-0.655728	0.0125919
DISP2	85455	dispatched RND transporter family member 2	-1.59784	0.00193827
DMTN	2039	dematin actin binding protein	-0.978124	0.0216867
DNAJB1	3337	DnaJ heat shock protein family (Hsp40) member B1	0.727544	0.013676
DNAJB6	10049	DnaJ heat shock protein family (Hsp40) member B6	0.416068	0.0176337
DNAJC1	64215	DnaJ heat shock protein family (Hsp40) member C1	0.365177	0.0499557
DNAJC22	79962	DnaJ heat shock protein family (Hsp40) member C22	1.41675	0.0253875
DNAJC7	7266	DnaJ heat shock protein family (Hsp40) member C7	0.446127	0.032985
DOCK10	55619	dedicator of cytokinesis 10	-1.02639	0.0142259
DPP4	1803	dipeptidyl peptidase 4	1.35436	0.029763
DPY19L2	283417	dpy-19 like 2	-1.77145	0.0315433
DPY19L3	147991	dpy-19 like C-mannosyltransferase 3	-0.751098	0.035886
DTX2P1-UPK3BP1-PMS2P11	441263	DTX2P1-UPK3BP1-PMS2P11 readthrough, transcribed pseudogene	-0.530746	0.0471759
E2F2	1870	E2F transcription factor 2	-0.692662	0.0405571
EEF1A1P19	100421796	eukaryotic translation elongation factor 1 alpha 1 pseudogene 19	-1.77575	0.0202159
EFHC1	114327	EF-hand domain containing 1	-1.35115	0.0281844
EGR1	1958	early growth response 1	-1.04917	0.000247407
EHMT1	79813	euchromatic histone lysine methyltransferase 1	-1.04446	0.0074061
EIF3J	8669	eukaryotic translation initiation factor 3 subunit J	0.361284	0.0273414
EIF4B	1975	eukaryotic translation initiation factor 4B	0.326272	0.0452766
EML2-AS1	100287177	EML2 antisense RNA 1	1.2589	0.0265919
ENKD1	84080	enkurin domain containing 1	-0.75127	0.0146384
ERBB2	2064	erb-b2 receptor tyrosine kinase 2	-0.992653	0.0326258
ERF	2077	ETS2 repressor factor	-0.585416	0.0300556
ERO1B	56605	endoplasmic reticulum oxidoreductase 1 beta	0.873004	0.0304011
ESX1	80712	ESX homeobox 1	1.87082	0.0258209
EVC2	132884	EvC ciliary complex subunit 2	0.859573	0.0108747
EXO1	9156	exonuclease 1	-0.430558	0.0421889
EXOSC5	56915	exosome component 5	0.391845	0.0291318
FAAP100	80233	FA core complex associated protein 100	-0.680479	0.011763
FAM122C	159091	family with sequence similarity 122C	0.570183	0.0413967
FAM149B1	317662	family with sequence similarity 149 member B1	0.742373	0.0315841
FAM153CP	653316	family with sequence similarity 153 member C	0.749346	0.040355
FAM32A	26017	family with sequence similarity 32 member A	0.354626	0.043979
FAXC	84553	failed axon connections homolog, metaxin like GST domain containing	0.973941	0.00703018
FBRSL1	57666	fibrosin like 1	0.473803	0.0207952
FBXO11	80204	F-box protein 11	0.568138	0.0297533
FBXO38	81545	F-box protein 38	0.790413	0.0148914
FCHSD1	89848	FCH and double SH3 domains 1	-0.857826	0.039396
FEZ1	9638	fasciculation and elongation protein zeta 1	0.409533	0.0487814
FHL2	2274	four and a half LIM domains 2	0.513316	0.0131716
FHOD1	29109	formin homology 2 domain containing 1	-0.648369	0.0199171
FKBP4	2288	FKBP prolyl isomerase 4	0.523602	0.0277742
FKBP5	2289	FKBP prolyl isomerase 5	-0.29632	0.0495277
FLT4	2324	fms related tyrosine kinase 4	1.02749	0.0131136
FMC1-LUC7L2	100996928	FMC1-LUC7L2 readthrough	-5.5726	0.011866
FMNL3	91010	formin like 3	-0.570788	0.0136149
FN3K	64122	fructosamine 3 kinase	-0.916347	0.0149319
FNBP4	23360	formin binding protein 4	-1.02232	0.0129865
FNTB	2342	farnesyltransferase, CAAX box, beta	0.526891	0.0362981
FOLH1	2346	folate hydrolase 1	1.21233	0.0379325
FOSB	2354	FosB proto-oncogene, AP-1 transcription factor subunit	-1.50878	0.0127503
FOXF2	2295	forkhead box F2	0.975267	0.0214153
FOXQ1	94234	forkhead box Q1	1.587	0.00476386
FRMPD1	22844	FERM and PDZ domain containing 1	0.981956	0.000899021
FSD2	123722	fibronectin type III and SPRY domain containing 2	1.88292	0.0060037
FUCA2	2519	alpha-L-fucosidase 2	0.363442	0.0326694
FYCO1	79443	FYVE and coiled-coil domain containing 1	-0.954077	0.00588421
FZD3	7976	frizzled class receptor 3	-1.21934	0.0466741
FZD6	8323	frizzled class receptor 6	-0.644317	0.00472756
GABBR1	2550	gamma-aminobutyric acid type B receptor subunit 1	-0.990299	0.0440008
GAL	51083	galanin and GMAP prepropeptide	0.552859	0.00928369
GALNS	2588	galactosamine (N-acetyl)-6-sulfatase	0.486513	0.0228487
GAR1	54433	GAR1 ribonucleoprotein	0.352416	0.04937
GART	2618	phosphoribosylglycinamide formyltransferase, phosphoribosylglycinamide synthetase, phosphoribosylaminoimidazole synthetase	0.397152	0.034685
GATD3A	8209	glutamine amidotransferase like class 1 domain containing 3A	-2.533	0.0289558
GBGT1	26301	globoside alpha-1,3-N-acetylgalactosaminyltransferase 1 (FORS blood group)	-1.05026	0.0362785
GBP3	2635	guanylate binding protein 3	1.30408	0.0450789
GDAP1	54332	ganglioside induced differentiation associated protein 1	-1.77777	0.00816523
GEMIN6	79833	gem nuclear organelle associated protein 6	0.561911	0.0108473
GNG2	54331	G protein subunit gamma 2	-5.2045	0.00239169
GOLGA4	2803	golgin A4	-0.422548	0.0435011
GOPC	57120	golgi associated PDZ and coiled-coil motif containing	-0.778615	0.0196151
GP1BB	2812	glycoprotein Ib platelet subunit beta	-8.09916	0.0102027
GPAT4	137964	glycerol-3-phosphate acyltransferase 4	-0.366614	0.033342
GPBP1L1	60313	GC-rich promoter binding protein 1 like 1	0.489507	0.0422604
GRK3	157	G protein-coupled receptor kinase 3	-0.605861	0.0289916
GTF3C2	2976	general transcription factor IIIC subunit 2	-0.729173	0.00620893
H2BC11	8970	H2B clustered histone 11	-1.04203	0.0415081
H2BC18	440689	H2B clustered histone 18	-2.03924	0.0348995
H3C14	126961	H3 clustered histone 14	-0.908499	0.0284952
H3P37	664611	H3 histone pseudogene 37	1.17471	0.00750697
HAUS5	23354	HAUS augmin like complex subunit 5	-0.995274	0.0120677
HDAC4	9759	histone deacetylase 4	-0.993711	0.0222085
HELLS	3070	helicase, lymphoid specific	-0.518856	0.0331656
HERC2P3	283755	hect domain and RLD 2 pseudogene 3	-2.48483	0.0043113
HERC2P9	440248	hect domain and RLD 2 pseudogene 9	-1.28765	0.00683828
HIF1AN	55662	hypoxia inducible factor 1 subunit alpha inhibitor	-0.781136	0.024534
HIPK2	28996	homeodomain interacting protein kinase 2	-0.885383	0.0156639
HLA-DQA1	3117	major histocompatibility complex, class II, DQ alpha 1	3.17264	0.00776145
HMCN2	256158	hemicentin 2	0.820995	0.0424488
HMGN4	10473	high mobility group nucleosomal binding domain 4	0.622611	0.0158231
HNRNPA1P40	100129920	heterogeneous nuclear ribonucleoprotein A1 pseudogene 40	1.3044	0.0196001
HNRNPC	3183	heterogeneous nuclear ribonucleoprotein C	0.487232	0.00977708
HNRNPUL2	221092	heterogeneous nuclear ribonucleoprotein U like 2	-0.45898	0.0278766
HSP90AA1	3320	heat shock protein 90 alpha family class A member 1	0.591572	0.0466277
HSPA1A	3303	heat shock protein family A (Hsp70) member 1A	1.08428	0.00434191
HSPA1B	3304	heat shock protein family A (Hsp70) member 1B	1.02033	0.00161026
HSPA5	3309	heat shock protein family A (Hsp70) member 5	0.627974	0.018316
HSPA6	3310	heat shock protein family A (Hsp70) member 6	1.19864	0.00783793
HSPA9	3313	heat shock protein family A (Hsp70) member 9	0.326161	0.0458922
HSPD1	3329	heat shock protein family D (Hsp60) member 1	0.505192	0.0314576
HTR7P1	93164	5-hydroxytryptamine receptor 7 pseudogene 1	1.22866	0.0494682
ICE2	79664	interactor of little elongation complex ELL subunit 2	-0.709314	0.0328663
IKZF4	64375	IKAROS family zinc finger 4	-1.84861	0.0279928
IL11	3589	interleukin 11	0.848333	0.004534
IL1R1	3554	interleukin 1 receptor type 1	-0.677892	0.0386887
ILF3-DT	147727	ILF3 divergent transcript	0.844567	0.0352061
ILKAP	80895	ILK associated serine/threonine phosphatase	-0.40794	0.045653
INTS8	55656	integrator complex subunit 8	0.585461	0.0263687
IRS3P	442338	insulin receptor substrate 3, pseudogene	1.42007	0.0144826
ISCA2	122961	iron-sulfur cluster assembly 2	-1.23107	0.0487391
ISM1	140862	isthmin 1	0.741671	0.0189039
ISY1-RAB43	100534599	ISY1-RAB43 readthrough	3.12946	0.0129505
ITGA11	22801	integrin subunit alpha 11	2.2586	0.0228239
ITGA2	3673	integrin subunit alpha 2	-0.735232	0.00856781
ITIH5	80760	inter-alpha-trypsin inhibitor heavy chain 5	1.12146	0.032294
ITPRID2	6744	ITPR interacting domain containing 2	0.672293	0.0169036
JAM3	83700	junctional adhesion molecule 3	0.411481	0.0170647
JMJD4	65094	jumonji domain containing 4	-0.942782	0.0449125
JMJD6	23210	jumonji domain containing 6, arginine demethylase and lysine hydroxylase	0.341594	0.0413011
JUND	3727	JunD proto-oncogene, AP-1 transcription factor subunit	-0.422685	0.021892
KAT2A	2648	lysine acetyltransferase 2A	0.537056	0.0496385
KCNK3	3777	potassium two pore domain channel subfamily K member 3	1.54137	0.0304293
KCNMB1	3779	potassium calcium-activated channel subfamily M regulatory beta subunit 1	0.883788	0.0293335
KIAA1958	158405	KIAA1958	-0.724363	0.0272097
KIF15	56992	kinesin family member 15	-1.27728	0.034457
KIF18A	81930	kinesin family member 18A	0.758231	0.0345728
KIFC1	3833	kinesin family member C1	0.580863	0.0114086
KIZ	55857	kizuna centrosomal protein	-0.533845	0.0394653
KLF3	51274	Kruppel like factor 3	0.477251	0.0477217
KMT5B	51111	lysine methyltransferase 5B	-0.87671	0.00426017
KPNA4	3840	karyopherin subunit alpha 4	0.519856	0.036087
KRIT1	889	KRIT1 ankyrin repeat containing	-0.61928	0.0494149
LAMA5	3911	laminin subunit alpha 5	0.419753	0.0205444
LCT	3938	lactase	-1.62382	0.0459643
LIMK2	3985	LIM domain kinase 2	-0.457437	0.0343674
LINC00205	642852	long intergenic non-protein coding RNA 205	-1.44641	0.0108746
LINC00324	284029	long intergenic non-protein coding RNA 324	1.67609	0.0216224
LINC01534	101927621	long intergenic non-protein coding RNA 1534	1.20232	0.0470506
LINC01896	645321	long intergenic non-protein coding RNA 1896	1.49835	0.0220574
LINC02609	105378853	long intergenic non-protein coding RNA 2609	1.9293	0.00449419
LNPK	80856	lunapark, ER junction formation factor	0.919301	0.0380721
LRCH3	84859	leucine rich repeats and calponin homology domain containing 3	-0.885565	0.0113036
LRRFIP1	9208	LRR binding FLII interacting protein 1	0.544175	0.00273496
LSM14A	26065	LSM14A mRNA processing body assembly factor	0.469422	0.0311549
LTBP1	4052	latent transforming growth factor beta binding protein 1	-0.691168	0.00864057
LUC7L3	51747	LUC7 like 3 pre-mRNA splicing factor	0.381111	0.0147763
LYAR	55646	Ly1 antibody reactive	0.501761	0.0236065
LYST	1130	lysosomal trafficking regulator	1.39258	0.0464263
LZTR1	8216	leucine zipper like transcription regulator 1	-0.819466	0.0109932
MAGEB10	139422	MAGE family member B10	2.15314	0.0474811
MAGI2	9863	membrane associated guanylate kinase, WW and PDZ domain containing 2	-4.03166	0.0386962
MAN2C1	4123	mannosidase alpha class 2C member 1	-1.06771	0.0232011
MANSC1	54682	MANSC domain containing 1	-0.876833	0.0127209
MAP7D2	256714	MAP7 domain containing 2	-0.951695	0.0158679
MAP7D3	79649	MAP7 domain containing 3	-0.550379	0.0290162
MARCHF8	220972	membrane associated ring-CH-type finger 8	-0.978325	0.032022
MARVELD1	83742	MARVEL domain containing 1	-0.473237	0.02584
MAX	4149	MYC associated factor X	0.430414	0.0499951
MBD4	8930	methyl-CpG binding domain 4, DNA glycosylase	-0.448049	0.0278822
MCF2L2	23101	MCF.2 cell line derived transforming sequence-like 2	1.45412	0.0135319
MED29	55588	mediator complex subunit 29	-0.693422	0.00585738
MEIS2	4212	Meis homeobox 2	-0.700491	0.0496658
MICB	4277	MHC class I polypeptide-related sequence B	0.414068	0.0187193
MIEF2	125170	mitochondrial elongation factor 2	-1.14297	0.0184225
MIER1	57708	MIER1 transcriptional regulator	0.459673	0.0317139
MIGA2	84895	mitoguardin 2	-0.812175	0.0419379
MIR17HG	407975	miR-17-92a-1 cluster host gene	-0.826338	0.0434896
MLYCD	23417	malonyl-CoA decarboxylase	-2.81728	0.000574709
MMP10	4319	matrix metallopeptidase 10	0.843407	0.0134741
MMRN2	79812	multimerin 2	-0.436192	0.0109381
MOB4	25843	MOB family member 4, phocein	0.661657	0.04718
MPP3	4356	membrane palmitoylated protein 3	-0.786444	0.0318357
MRPL45P2	653479	mitochondrial ribosomal protein L45 pseudogene 2	-1.27547	0.0328356
MRPS26	64949	mitochondrial ribosomal protein S26	-0.623583	0.0475447
MRRF	92399	mitochondrial ribosome recycling factor	0.411133	0.0252906
MSTO1	55154	misato mitochondrial distribution and morphology regulator 1	-0.879456	0.0170202
MTA1	9112	metastasis associated 1	0.410408	0.0254064
MTHFD1L	25902	methylenetetrahydrofolate dehydrogenase (NADP+ dependent) 1 like	0.332317	0.0245892
MTHFD2	10797	methylenetetrahydrofolate dehydrogenase (NADP+ dependent) 2, methenyltetrahydrofolate cyclohydrolase	0.41594	0.0239132
MTR	4548	5-methyltetrahydrofolate-homocysteine methyltransferase	0.596703	0.0289031
MTUS1	57509	microtubule associated scaffold protein 1	0.791899	0.00825848
MYH10	4628	myosin heavy chain 10	-0.795658	0.00438304
MYLK	4638	myosin light chain kinase	-1.80825	0.00651913
MYO18A	399687	myosin XVIIIA	-1.01369	0.0473032
MYRIP	25924	myosin VIIA and Rab interacting protein	-2.98071	0.00477795
N4BP1	9683	NEDD4 binding protein 1	-1.58184	0.00219974
NACA	4666	nascent polypeptide associated complex subunit alpha	0.370428	0.0498224
NATD1	256302	N-acetyltransferase domain containing 1	-1.03896	0.00110581
NBAS	51594	NBAS subunit of NRZ tethering complex	0.79474	0.0392884
NBPF1	55672	NBPF member 1	-0.677706	0.0123822
NCBP2AS2	152217	NCBP2 antisense 2 (head to head)	0.624867	0.0118881
NCDN	23154	neurochondrin	-0.599029	0.0137573
NDOR1	27158	NADPH dependent diflavin oxidoreductase 1	-0.806485	0.0333878
NDRG1	10397	N-myc downstream regulated 1	0.650123	0.022212
NEB	4703	nebulin	-1.40542	0.0363008
NEDD4	4734	NEDD4 E3 ubiquitin protein ligase	-0.439828	0.0489887
NEFM	4741	neurofilament medium	1.30593	0.040181
NEIL1	79661	nei like DNA glycosylase 1	-2.6818	0.0059427
NEIL3	55247	nei like DNA glycosylase 3	-1.62317	0.0136536
NEO1	4756	neogenin 1	-2.28579	0.018852
NF1	4763	neurofibromin 1	-0.919315	0.00207251
NFATC2IP	84901	nuclear factor of activated T cells 2 interacting protein	-0.493148	0.0179014
NFKB2	4791	nuclear factor kappa B subunit 2	-0.780081	0.0122934
NHLH1	4807	nescient helix-loop-helix 1	1.0666	0.0222869
NID2	22795	nidogen 2	0.704445	0.0150203
NIPA1	123606	NIPA magnesium transporter 1	-0.640606	0.0108347
NIPAL1	152519	NIPA like domain containing 1	0.752349	0.0451604
NISCH	11188	nischarin	-0.504502	0.0386832
NKX6-2	84504	NK6 homeobox 2	2.14598	0.0207853
NLRX1	79671	NLR family member X1	-0.945791	0.0455849
NME1-NME2	654364	NME1-NME2 readthrough	0.985183	0.00171619
NOB1	28987	NIN1 (RPN12) binding protein 1 homolog	0.41789	0.0127607
NOX4	50507	NADPH oxidase 4	-1.28339	0.00584417
NPHP3	27031	nephrocystin 3	-1.42068	0.00146306
NR4A1	3164	nuclear receptor subfamily 4 group A member 1	0.960063	0.0491888
NSUN5	55695	NOP2/Sun RNA methyltransferase 5	0.59716	0.0196159
NUDT16	131870	nudix hydrolase 16	-0.908072	0.0417944
NUDT8	254552	nudix hydrolase 8	-1.5305	0.0340856
NUDT9	53343	nudix hydrolase 9	0.533906	0.0133685
NUP214	8021	nucleoporin 214	-1.05617	0.00710233
NXT2	55916	nuclear transport factor 2 like export factor 2	0.659524	0.0152126
OAZ1	4946	ornithine decarboxylase antizyme 1	0.469771	0.0282338
OBI1	79596	ORC ubiquitin ligase 1	0.62465	0.0452678
OXR1	55074	oxidation resistance 1	-0.671575	0.00680276
P2RX5	5026	purinergic receptor P2X 5	1.40893	0.00972294
P4HA2	8974	prolyl 4-hydroxylase subunit alpha 2	0.465978	0.0170875
PAN2	9924	poly(A) specific ribonuclease subunit PAN2	-2.13584	0.0149128
PARD6B	84612	par-6 family cell polarity regulator beta	2.06133	0.0167868
PBX2	5089	PBX homeobox 2	-0.759516	0.0313163
PCCA-DT	105370333	PCCA divergent transcript	-0.983508	0.0365691
PCDH10	57575	protocadherin 10	-0.523714	0.0490652
PCDH11Y	83259	protocadherin 11 Y-linked	0.681758	0.0437591
PCGF2	7703	polycomb group ring finger 2	-0.558956	0.0351868
PCNX4	64430	pecanex 4	-1.30308	0.00770359
PDE4C	5143	phosphodiesterase 4C	1.92531	0.0085906
PELI2	57161	pellino E3 ubiquitin protein ligase family member 2	1.58417	0.0330427
PEX16	9409	peroxisomal biogenesis factor 16	-0.915446	0.00885637
PGAP3	93210	post-GPI attachment to proteins phospholipase 3	-1.33838	0.0352118
PGGT1B	5229	protein geranylgeranyltransferase type I subunit beta	-0.628446	0.0470838
PI4K2B	55300	phosphatidylinositol 4-kinase type 2 beta	-0.544259	0.0227633
PI4KA	5297	phosphatidylinositol 4-kinase alpha	-0.55373	0.028914
PIPSL	266971	PIP5K1A and PSMD4 like (pseudogene)	1.6914	0.0383764
PKP2	5318	plakophilin 2	1.28086	0.0217443
PLAG1	5324	PLAG1 zinc finger	-1.11835	0.0269981
PLOD3	8985	procollagen-lysine,2-oxoglutarate 5-dioxygenase 3	0.367725	0.0353664
PLSCR1	5359	phospholipid scramblase 1	-0.428549	0.0469368
PLXNB3	5365	plexin B3	-1.8633	0.0100697
PMS2P6	729453	PMS1 homolog 2, mismatch repair system component pseudogene 6	-4.61913	0.0079028
PNKP	11284	polynucleotide kinase 3'-phosphatase	-0.700438	0.0478176
PNLDC1	154197	PARN like, ribonuclease domain containing 1	1.65301	0.0128328
PNO1	56902	partner of NOB1 homolog	0.32709	0.0462079
POLE	5426	DNA polymerase epsilon, catalytic subunit	-0.505587	0.0406951
POLH	5429	DNA polymerase eta	-0.857098	0.00832096
POMC	5443	proopiomelanocortin	1.51524	0.0113196
POR	5447	cytochrome p450 oxidoreductase	-0.483386	0.0199301
POU2F1	5451	POU class 2 homeobox 1	-0.999889	0.00113914
PPID	5481	peptidylprolyl isomerase D	0.609614	0.00273543
PPIE	10450	peptidylprolyl isomerase E	0.462411	0.0251595
PPIEL	728448	peptidylprolyl isomerase E like pseudogene	-1.54583	0.028972
PPM1K	152926	protein phosphatase, Mg2+/Mn2+ dependent 1K	-0.836275	0.0463623
PPP1R12B	4660	protein phosphatase 1 regulatory subunit 12B	-1.58682	0.0406342
PPP1R3F	89801	protein phosphatase 1 regulatory subunit 3F	1.37467	0.0473932
PPP1R8	5511	protein phosphatase 1 regulatory subunit 8	-0.633419	0.0419947
PPP2CB	5516	protein phosphatase 2 catalytic subunit beta	0.310269	0.0354924
PRDM13	59336	PR/SET domain 13	-1.98235	0.00750783
PRDM8	56978	PR/SET domain 8	1.16666	0.0283933
PROSER2	254427	proline and serine rich 2	0.5096	0.0146858
PROSER3	148137	proline and serine rich 3	0.818056	0.0481901
PRR22	163154	proline rich 22	-1.04271	0.0209294
PSEN2	5664	presenilin 2	-1.08216	0.0040429
PSMG3-AS1	114796	PSMG3 antisense RNA 1 (head to head)	-2.7451	0.00267287
PSPN	5623	persephin	1.98198	0.00135877
PTAFR	5724	platelet activating factor receptor	0.700921	0.047067
PTGES3	10728	prostaglandin E synthase 3	0.365906	0.0306441
PTPN21	11099	protein tyrosine phosphatase non-receptor type 21	0.799151	0.0200037
PTPN23	25930	protein tyrosine phosphatase non-receptor type 23	-0.549391	0.0178117
PTPRA	5786	protein tyrosine phosphatase receptor type A	-0.441765	0.0160669
PUS7	54517	pseudouridine synthase 7	-0.536989	0.0176552
PVT1	5820	Pvt1 oncogene	-0.848368	0.0125655
PXMP4	11264	peroxisomal membrane protein 4	-1.03814	0.0443649
PYCARD	29108	PYD and CARD domain containing	-2.31171	0.0317283
RAB11FIP3	9727	RAB11 family interacting protein 3	-0.700928	0.00931963
RAB42	115273	RAB42, member RAS oncogene family	0.935615	0.0422248
RAB9A	9367	RAB9A, member RAS oncogene family	0.572493	0.0206908
RABGAP1L	9910	RAB GTPase activating protein 1 like	-0.478582	0.0457482
RACGAP1	29127	Rac GTPase activating protein 1	0.466288	0.0406342
RAD23A	5886	RAD23 homolog A, nucleotide excision repair protein	0.587112	0.0123367
RALGAPA2	57186	Ral GTPase activating protein catalytic alpha subunit 2	-1.17727	0.00381187
RANBP6	26953	RAN binding protein 6	-0.994018	0.00977839
RAPGEF6	51735	Rap guanine nucleotide exchange factor 6	-0.692398	0.0354499
RBM18	92400	RNA binding motif protein 18	0.599161	0.0408567
RBMS2	5939	RNA binding motif single stranded interacting protein 2	0.611992	0.0297565
RBMS3-AS3	100873979	RBMS3 antisense RNA 3	-1.8009	0.0333363
RCOR1	23186	REST corepressor 1	-0.654939	0.0420724
RECQL4	9401	RecQ like helicase 4	-0.760059	0.0215111
RET	5979	ret proto-oncogene	-1.92684	0.00919286
RHOT2	89941	ras homolog family member T2	-0.611262	0.011939
RING1	6015	ring finger protein 1	-0.644007	0.0476329
RNASE4	6038	ribonuclease A family member 4	-2.26937	0.0201353
RNU6-36P	100873757	RNA, U6 small nuclear 36, pseudogene	-10.3738	0.022494
RNU6-5P	106478913	RNA, U6 small nuclear 5, pseudogene	1.66936	0.0146956
RPA2	6118	replication protein A2	0.410865	0.015232
RPAP1	26015	RNA polymerase II associated protein 1	0.462892	0.0312509
RPAP2	79871	RNA polymerase II associated protein 2	0.700242	0.0427425
RPF1	80135	ribosome production factor 1 homolog	0.438935	0.0230818
RPF2	84154	ribosome production factor 2 homolog	0.546648	0.00889286
RPGR	6103	retinitis pigmentosa GTPase regulator	-0.72971	0.0431001
RPIA	22934	ribose 5-phosphate isomerase A	0.437339	0.0315921
RPL17-C18orf32	100526842	RPL17-C18orf32 readthrough	1.50265	0.0223564
RRP7BP	91695	ribosomal RNA processing 7 homolog B, pseudogene	-0.821556	0.005647
RSL24D1	51187	ribosomal L24 domain containing 1	0.375653	0.034372
RXRA	6256	retinoid X receptor alpha	0.388314	0.0437041
SAE1	10055	SUMO1 activating enzyme subunit 1	0.341642	0.0324228
SBDS	51119	SBDS ribosome maturation factor	0.378367	0.0327446
SCAI	286205	suppressor of cancer cell invasion	-1.75841	0.00571893
SCAMP1-AS1	728769	SCAMP1 antisense RNA 1	-1.57662	0.0214003
SCAMP5	192683	secretory carrier membrane protein 5	-0.971961	0.0460449
SCML2	10389	Scm polycomb group protein like 2	0.7953	0.0443847
SDCCAG8	10806	serologically defined colon cancer antigen 8	0.703805	0.0458277
SEC23IP	11196	SEC23 interacting protein	0.803115	0.0103158
SELE	6401	selectin E	-3.42266	0.000663316
SELENOK	58515	selenoprotein K	0.527972	0.03856
SELPLG	6404	selectin P ligand	0.827728	0.0148662
SEPTIN5	5413	septin 5	-1.25033	0.000991281
SERPINE1	5054	serpin family E member 1	0.58053	0.0190302
SETD4	54093	SET domain containing 4	0.64478	0.0332775
SF3B6	51639	splicing factor 3b subunit 6	0.39563	0.0307704
SH2D4A	63898	SH2 domain containing 4A	1.3991	0.00307857
SH3BGRL2	83699	SH3 domain binding glutamate rich protein like 2	-0.618992	0.0331441
SHANK1	50944	SH3 and multiple ankyrin repeat domains 1	-2.305	0.0207037
SHFL	55337	shiftless antiviral inhibitor of ribosomal frameshifting	0.62732	0.0437521
SIPA1L3	23094	signal induced proliferation associated 1 like 3	-0.604972	0.0486839
SLC10A4	201780	solute carrier family 10 member 4	1.67642	0.0208213
SLC11A1	6556	solute carrier family 11 member 1	2.05862	0.000656368
SLC15A4	121260	solute carrier family 15 member 4	-0.686507	0.0367132
SLC16A13	201232	solute carrier family 16 member 13	-1.41748	0.0223867
SLC1A4	6509	solute carrier family 1 member 4	-0.591212	0.0268909
SLC23A2	9962	solute carrier family 23 member 2	-0.756458	0.00722677
SLC25A40	55972	solute carrier family 25 member 40	-0.83771	0.0174246
SLC27A3	11000	solute carrier family 27 member 3	-1.32047	0.0454773
SLC27A4	10999	solute carrier family 27 member 4	-0.54244	0.0175289
SLC35E2A	9906	solute carrier family 35 member E2A	-0.829785	0.0462979
SLC9A6	10479	solute carrier family 9 member A6	-1.01904	0.0133778
SMAD1	4086	SMAD family member 1	1.06111	0.0384715
SMAD7	4092	SMAD family member 7	0.550693	0.0485575
SMIM14	201895	small integral membrane protein 14	0.932551	0.0341152
SMN1	6606	survival of motor neuron 1, telomeric	0.4028	0.0211564
SMN2	6607	survival of motor neuron 2, centromeric	0.540701	0.0260683
SNAI1	6615	snail family transcriptional repressor 1	0.698969	0.0138449
SNPH	9751	syntaphilin	-1.5563	0.0197475
SNX12	29934	sorting nexin 12	-0.608802	0.0269434
SNX8	29886	sorting nexin 8	-0.73675	0.0267648
SORD	6652	sorbitol dehydrogenase	0.611843	0.042016
SPAAR	158376	small regulatory polypeptide of amino acid response	-4.54091	0.00727554
SPATS2L	26010	spermatogenesis associated serine rich 2 like	0.492739	0.0114531
SPRTN	83932	SprT-like N-terminal domain	-0.630864	0.0462681
SRD5A1	6715	steroid 5 alpha-reductase 1	-1.21073	0.0423019
SRRM1	10250	serine and arginine repetitive matrix 1	0.365453	0.0370374
ST14	6768	suppression of tumorigenicity 14	-3.10686	0.00330514
ST3GAL6-AS1	100874207	ST3GAL6 antisense RNA 1	-1.54641	0.0269526
STIMATE	375346	STIM activating enhancer	-0.681049	0.0172236
STX2	2054	syntaxin 2	0.951343	0.0111984
SUOX	6821	sulfite oxidase	-1.46091	0.00530806
SYNGAP1	8831	synaptic Ras GTPase activating protein 1	-0.97023	0.0411358
SYP	6855	synaptophysin	0.977422	0.0425074
TAC1	6863	tachykinin precursor 1	2.11508	0.0190869
TAF1	6872	TATA-box binding protein associated factor 1	-1.09435	0.0225823
TAF13	6884	TATA-box binding protein associated factor 13	0.441311	0.0355476
TAF1A	9015	TATA-box binding protein associated factor, RNA polymerase I subunit A	0.658083	0.0265145
TAF7	6879	TATA-box binding protein associated factor 7	0.406219	0.0167864
TAF8	129685	TATA-box binding protein associated factor 8	0.515645	0.0250651
TANK	10010	TRAF family member associated NFKB activator	0.619015	0.0276292
TASOR	23272	transcription activation suppressor	-0.504784	0.0108341
TBX18	9096	T-box transcription factor 18	1.03877	0.0398406
TCEA2	6919	transcription elongation factor A2	0.477481	0.0278856
TCEAL1	9338	transcription elongation factor A like 1	1.23322	0.0284739
TELO2	9894	telomere maintenance 2	-0.449705	0.0231359
TES	26136	testin LIM domain protein	0.510608	0.00850776
TFAP2A	7020	transcription factor AP-2 alpha	-1.07645	0.00751061
THEM6	51337	thioesterase superfamily member 6	-0.58867	0.0156874
TIAM1	7074	TIAM Rac1 associated GEF 1	-2.127	0.0439164
TIMM23B	100652748	translocase of inner mitochondrial membrane 23 homolog B	-1.19806	0.0228779
TJP1	7082	tight junction protein 1	0.73489	0.0297748
TLE4	7091	TLE family member 4, transcriptional corepressor	-0.961648	0.0341615
TLR1	7096	toll like receptor 1	-1.85181	0.0372622
TMED7-TICAM2	100302736	TMED7-TICAM2 readthrough	0.581751	0.0141001
TMED8	283578	transmembrane p24 trafficking protein family member 8	-0.814729	0.0257402
TMEM106B	54664	transmembrane protein 106B	-0.546778	0.0236125
TMEM150C	441027	transmembrane protein 150C	-1.58801	0.0289895
TMEM185A	84548	transmembrane protein 185A	0.549878	0.0367482
TMEM216	51259	transmembrane protein 216	0.958494	0.0247905
TMEM25	84866	transmembrane protein 25	-1.06515	0.0242114
TMEM254	80195	transmembrane protein 254	-1.37003	0.0345402
TMEM260	54916	transmembrane protein 260	0.710534	0.0365731
TMEM38B	55151	transmembrane protein 38B	0.444564	0.0388129
TMEM68	137695	transmembrane protein 68	0.615044	0.0405461
TMEM9B-AS1	493900	TMEM9B antisense RNA 1	1.93769	0.0153454
TMTC1	83857	transmembrane O-mannosyltransferase targeting cadherins 1	1.54695	0.0293618
TNFAIP3	7128	TNF alpha induced protein 3	-2.67436	0.000364572
TOP1MT	116447	DNA topoisomerase I mitochondrial	0.527741	0.0209707
TPTEP2-CSNK1E	102800317	TPTEP2-CSNK1E readthrough	-3.45898	0.0126987
TRIB2	28951	tribbles pseudokinase 2	1.00973	0.0459659
TRIM41	90933	tripartite motif containing 41	-1.03485	0.00910664
TRIM73	375593	tripartite motif containing 73	-2.16554	0.0101059
TRIP4	9325	thyroid hormone receptor interactor 4	-1.05437	0.00897004
TRMT2A	27037	tRNA methyltransferase 2 homolog A	-0.676566	0.0320841
TRPM4	54795	transient receptor potential cation channel subfamily M member 4	-0.776538	0.0343024
TTYH2	94015	tweety family member 2	-1.39315	0.0312464
U2AF1L5	102724594	U2 small nuclear RNA auxiliary factor 1 like 5	0.472021	0.0220977
UBBP4	23666	ubiquitin B pseudogene 4	1.00713	0.0422159
UBC	7316	ubiquitin C	0.703807	0.00803485
UBE2V2	7336	ubiquitin conjugating enzyme E2 V2	0.452158	0.0254819
UBE3B	89910	ubiquitin protein ligase E3B	-1.10284	0.00121819
UBXN8	7993	UBX domain protein 8	0.546374	0.0087791
UCP3	7352	uncoupling protein 3	-1.64525	0.038406
UGDH	7358	UDP-glucose 6-dehydrogenase	0.613053	0.0204486
UNC119	9094	unc-119 lipid binding chaperone	-0.760228	0.0357944
UPRT	139596	uracil phosphoribosyltransferase homolog	-0.786068	0.0359574
UTP14A	10813	UTP14A small subunit processome component	0.296461	0.0450246
UXT-AS1	100133957	UXT antisense RNA 1	1.20294	0.0470899
VMA21	203547	vacuolar ATPase assembly factor VMA21	0.583312	0.0163093
VPS13A	23230	vacuolar protein sorting 13 homolog A	-1.14632	0.00036847
VSIG1	340547	V-set and immunoglobulin domain containing 1	0.928028	0.0181898
WDR37	22884	WD repeat domain 37	-0.446839	0.0411004
WDR59	79726	WD repeat domain 59	-0.98177	0.0151852
WHAMMP3	339005	WAS protein homolog associated with actin, golgi membranes and microtubules pseudogene 3	1.09474	0.0306686
WWP1	11059	WW domain containing E3 ubiquitin protein ligase 1	-0.904296	0.0050423
XIST	7503	X inactive specific transcript	-0.835961	0.0263233
YRDC	79693	yrdC N6-threonylcarbamoyltransferase domain containing	0.358461	0.0261529
YTHDC1	91746	YTH domain containing 1	0.447313	0.049956
ZBTB2	57621	zinc finger and BTB domain containing 2	0.682535	0.00439091
ZCCHC7	84186	zinc finger CCHC-type containing 7	0.578517	0.0250841
ZDHHC17	23390	zinc finger DHHC-type containing 17	-0.729263	0.0413861
ZDHHC7	55625	zinc finger DHHC-type containing 7	0.530595	0.0301997
ZEB2	9839	zinc finger E-box binding homeobox 2	0.703714	0.0120196
ZFHX3	463	zinc finger homeobox 3	0.62912	0.0209858
ZFP69	339559	ZFP69 zinc finger protein	-1.2634	0.0179114
ZFP92	139735	ZFP92 zinc finger protein	-0.658289	0.0405772
ZFPM2	23414	zinc finger protein, FOG family member 2	0.620947	0.0173472
ZFYVE16	9765	zinc finger FYVE-type containing 16	-0.61971	0.0314171
ZIC5	85416	Zic family member 5	1.95099	0.0355728
ZIK1	284307	zinc finger protein interacting with K protein 1	-1.0988	0.0264299
ZKSCAN1	7586	zinc finger with KRAB and SCAN domains 1	0.471762	0.0194982
ZNF114	163071	zinc finger protein 114	0.736686	0.0411773
ZNF2	7549	zinc finger protein 2	0.707035	0.0448854
ZNF333	84449	zinc finger protein 333	-0.874666	0.0272773
ZNF33B	7582	zinc finger protein 33B	-0.954222	0.0207023
ZNF362	149076	zinc finger protein 362	-0.824645	0.0288416
ZNF500	26048	zinc finger protein 500	-1.1867	0.0310617
ZNF569	148266	zinc finger protein 569	-1.18405	0.0156194
ZNF570	148268	zinc finger protein 570	-1.18444	0.0348596
ZNF585B	92285	zinc finger protein 585B	0.605924	0.0483199
ZNF605	100289635	zinc finger protein 605	0.534795	0.0420182
ZNF653	115950	zinc finger protein 653	-0.99947	0.0464825
ZNF697	90874	zinc finger protein 697	-0.923032	0.0156248
ZNF767P	79970	zinc finger family member 767, pseudogene	-1.69349	0.012747
ZNF778	197320	zinc finger protein 778	-0.927582	0.0160602
ZNF786	136051	zinc finger protein 786	-1.81594	0.00425738
ZNRF3-AS1	100874123	ZNRF3 antisense RNA 1	0.790837	0.0309976
ZRANB3	84083	zinc finger RANBP2-type containing 3	0.873297	0.0362051

## Sheet: SMCs - Hypoxia vs Normoxia
SYMBOL	ENTREZID	GENENAME	logFC	PValue
AAR2	25980	AAR2 splicing factor	-0.549819	0.00742856
AASS	10157	aminoadipate-semialdehyde synthase	0.74455	0.0272476
ABCB6	10058	ATP binding cassette subfamily B member 6 (Langereis blood group)	0.810432	0.00449069
ABCB7	22	ATP binding cassette subfamily B member 7	0.51081	0.0413412
ABCC2	1244	ATP binding cassette subfamily C member 2	-1.37963	0.0204891
ABCC5	10057	ATP binding cassette subfamily C member 5	-0.486087	0.0490041
ABCF1	23	ATP binding cassette subfamily F member 1	-0.467551	0.00373445
ABCF2	10061	ATP binding cassette subfamily F member 2	-0.350361	0.041047
ABHD14B	84836	abhydrolase domain containing 14B	0.40463	0.0436962
ABHD17B	51104	abhydrolase domain containing 17B	-0.621392	0.0086552
ABLIM3	22885	actin binding LIM protein family member 3	0.826308	0.00313128
ACACB	32	acetyl-CoA carboxylase beta	1.58919	0.0345439
ACAD11	84129	acyl-CoA dehydrogenase family member 11	0.763893	0.0204784
ACAP1	9744	ArfGAP with coiled-coil, ankyrin repeat and PH domains 1	1.29573	0.0178352
ACAT1	38	acetyl-CoA acetyltransferase 1	0.415913	0.044996
ACAT2	39	acetyl-CoA acetyltransferase 2	1.16442	0.00637352
ACOT1	641371	acyl-CoA thioesterase 1	0.742918	0.021751
ACVR2B	93	activin A receptor type 2B	0.692111	0.0271784
ADAM9	8754	ADAM metallopeptidase domain 9	0.428015	0.0184843
ADAMTS18	170692	ADAM metallopeptidase with thrombospondin type 1 motif 18	0.824544	0.0465784
ADAP2	55803	ArfGAP with dual PH domains 2	2.63846	0.00701211
ADD3	120	adducin 3	0.610486	0.0224313
ADGRG1	9289	adhesion G protein-coupled receptor G1	0.573264	0.0222118
ADIRF	10974	adipogenesis regulatory factor	0.569054	0.0239814
ADM	133	adrenomedullin	0.783511	0.0370139
ADORA2A	135	adenosine A2a receptor	-1.3911	0.0153064
ADPRH	141	ADP-ribosylarginine hydrolase	0.839627	0.0358652
ADRM1	11047	adhesion regulating molecule 1	-0.644614	0.000452043
ADSS1	122622	adenylosuccinate synthase 1	1.44858	0.00117609
AEN	64782	apoptosis enhancing nuclease	-0.700839	0.00256936
AFF2	2334	AF4/FMR2 family member 2	1.80065	0.044445
AGBL5	60509	ATP/GTP binding protein like 5	0.662603	0.00178782
AGPS	8540	alkylglycerone phosphate synthase	0.450365	0.0427921
AHNAK2	113146	AHNAK nucleoprotein 2	0.754368	0.0295072
AK4	205	adenylate kinase 4	1.71368	0.0028853
AK4P1	206	adenylate kinase 4 pseudogene 1	2.15053	0.0186647
AKAP6	9472	A-kinase anchoring protein 6	1.09383	0.0184732
AKAP8	10270	A-kinase anchoring protein 8	-0.736484	0.00367132
AKIRIN1	79647	akirin 1	-0.578883	0.0025403
AKR1C1	1645	aldo-keto reductase family 1 member C1	-0.772778	0.0100081
AKR1C2	1646	aldo-keto reductase family 1 member C2	-0.807814	0.0291884
AKT3	10000	AKT serine/threonine kinase 3	0.501113	0.0312948
ALAS1	211	5'-aminolevulinate synthase 1	-0.359041	0.0398052
ALDH16A1	126133	aldehyde dehydrogenase 16 family member A1	-0.809553	0.00113151
ALDH2	217	aldehyde dehydrogenase 2 family member	0.443803	0.00492293
ALDH3B1	221	aldehyde dehydrogenase 3 family member B1	0.557831	0.0309835
ALDH6A1	4329	aldehyde dehydrogenase 6 family member A1	0.935902	0.00132973
ALDH7A1	501	aldehyde dehydrogenase 7 family member A1	0.490181	0.0253571
ALDOA	226	aldolase, fructose-bisphosphate A	0.562685	0.00197805
ALDOC	230	aldolase, fructose-bisphosphate C	2.00323	2.81907e-07
ALG3	10195	ALG3 alpha-1,3- mannosyltransferase	-0.481361	0.00835775
ALPK2	115701	alpha kinase 2	-1.27735	0.000351876
AMD1	262	adenosylmethionine decarboxylase 1	-0.583777	0.0143009
AMOT	154796	angiomotin	2.72674	0.000901856
AMZ2	51321	archaelysin family metallopeptidase 2	0.463466	0.0255576
ANGPT2	285	angiopoietin 2	-1.48407	0.00637052
ANGPTL2	23452	angiopoietin like 2	0.592135	0.0418803
ANKEF1	63926	ankyrin repeat and EF-hand domain containing 1	1.3568	0.0122786
ANKRD1	27063	ankyrin repeat domain 1	-1.37842	0.031562
ANKRD10	55608	ankyrin repeat domain 10	-0.478261	0.0150893
ANKRD11	29123	ankyrin repeat domain 11	-0.4542	0.0228064
ANKRD30B	374860	ankyrin repeat domain 30B	-0.941892	0.0294062
ANKRD37	353322	ankyrin repeat domain 37	1.415	4.30963e-05
ANKRD40	91369	ankyrin repeat domain 40	-0.361053	0.0237
ANKRD44	91526	ankyrin repeat domain 44	-1.09265	0.0364395
ANKRD52	283373	ankyrin repeat domain 52	-0.379952	0.0494445
ANO7	50636	anoctamin 7	0.875924	0.0441895
ANXA10	11199	annexin A10	-0.564957	0.0467259
AP2B1	163	adaptor related protein complex 2 subunit beta 1	0.363264	0.0463683
AP5B1	91056	adaptor related protein complex 5 subunit beta 1	-0.477135	0.0162803
APLN	8862	apelin	2.579	1.68104e-05
APOBEC3C	27350	apolipoprotein B mRNA editing enzyme catalytic subunit 3C	0.515865	0.0156008
APOBEC3D	140564	apolipoprotein B mRNA editing enzyme catalytic subunit 3D	1.53484	0.017607
APOBEC3F	200316	apolipoprotein B mRNA editing enzyme catalytic subunit 3F	1.82525	0.0199708
APOL1	8542	apolipoprotein L1	0.680539	0.0115458
APOL3	80833	apolipoprotein L3	0.912887	0.0194436
APOLD1	81575	apolipoprotein L domain containing 1	0.6838	0.0429875
ARC	23237	activity regulated cytoskeleton associated protein	-3.29842	0.00282353
ARF1	375	ADP ribosylation factor 1	-0.2758	0.0455205
ARF4	378	ADP ribosylation factor 4	-0.343329	0.0425661
ARFGAP1	55738	ADP ribosylation factor GTPase activating protein 1	-0.466813	0.0328528
ARFIP2	23647	ADP ribosylation factor interacting protein 2	-0.394693	0.0114062
ARG2	384	arginase 2	1.26696	0.0205029
ARHGDIG	398	Rho GDP dissociation inhibitor gamma	1.90132	0.0128747
ARHGEF11	9826	Rho guanine nucleotide exchange factor 11	-0.373154	0.0425432
ARHGEF25	115557	Rho guanine nucleotide exchange factor 25	1.08533	0.00324396
ARHGEF6	9459	Rac/Cdc42 guanine nucleotide exchange factor 6	0.595974	0.00546897
ARIH2	10425	ariadne RBR E3 ubiquitin protein ligase 2	-0.371977	0.0371404
ARL10	285598	ADP ribosylation factor like GTPase 10	0.740991	0.0123108
ARL17B	100506084	ADP ribosylation factor like GTPase 17B	-0.987566	0.0203078
ARL4A	10124	ADP ribosylation factor like GTPase 4A	-0.699405	0.0130395
ARL4D	379	ADP ribosylation factor like GTPase 4D	0.426533	0.042027
ARMC5	79798	armadillo repeat containing 5	-0.597509	0.0191224
ARMH4	145407	armadillo like helical domain containing 4	1.45018	0.00540948
ARPC5L	81873	actin related protein 2/3 complex subunit 5 like	-0.390413	0.0494674
ARRDC3	57561	arrestin domain containing 3	1.1902	0.000933847
ASB16-AS1	339201	ASB16 antisense RNA 1	0.892626	0.0445837
ASB6	140459	ankyrin repeat and SOCS box containing 6	-0.542051	0.0140897
ASCC2	84164	activating signal cointegrator 1 complex subunit 2	-0.421012	0.0117624
ASIC1	41	acid sensing ion channel subunit 1	0.731513	0.0401278
ASNS	440	asparagine synthetase (glutamine-hydrolyzing)	-0.784215	0.0252186
ASS1	445	argininosuccinate synthase 1	-0.564595	0.0190548
ASTN2	23245	astrotactin 2	0.869627	0.00856794
ATAD3A	55210	ATPase family AAA domain containing 3A	-0.787377	0.00381958
ATAD3B	83858	ATPase family AAA domain containing 3B	-0.79464	0.0377129
ATG101	60673	autophagy related 101	-0.400311	0.0299518
ATG9B	285973	autophagy related 9B	3.38086	0.000601648
ATP13A1	57130	ATPase 13A1	-0.389006	0.0150204
ATP1A1	476	ATPase Na+/K+ transporting subunit alpha 1	-0.29669	0.0422
ATP6V0D1	9114	ATPase H+ transporting V0 subunit d1	-0.487213	0.00905433
ATP6V0D2	245972	ATPase H+ transporting V0 subunit d2	1.79836	0.0284281
B3GALT4	8705	beta-1,3-galactosyltransferase 4	1.47892	0.000120731
B3GALT6	126792	beta-1,3-galactosyltransferase 6	-0.414007	0.0326129
B3GNT2	10678	UDP-GlcNAc:betaGal beta-1,3-N-acetylglucosaminyltransferase 2	-0.726464	0.00442807
B4GAT1	11041	beta-1,4-glucuronyltransferase 1	0.523413	0.0156184
B9D1	27077	B9 domain containing 1	0.673887	0.0436329
BAALC	79870	BAALC binder of MAP3K1 and KLF4	0.778975	0.0386163
BAALC-AS1	100499183	BAALC antisense RNA 1	0.997358	0.0245162
BACE1	23621	beta-secretase 1	0.599041	0.00157843
BACE2	25825	beta-secretase 2	0.641879	0.00575457
BAG1	573	BCL2 associated athanogene 1	-0.515933	0.0215593
BAG3	9531	BCL2 associated athanogene 3	-0.756517	0.00707956
BAK1	578	BCL2 antagonist/killer 1	-0.535915	0.0053048
BAZ1A	11177	bromodomain adjacent to zinc finger domain 1A	-0.88095	0.00153804
BCAR3	8412	BCAR3 adaptor protein, NSP family member	-0.415427	0.0489057
BCAS3	54828	BCAS3 microtubule associated cell migration factor	0.705152	0.0330609
BCCIP	56647	BRCA2 and CDKN1A interacting protein	-0.450443	0.0422007
BCKDHA	593	branched chain keto acid dehydrogenase E1 subunit alpha	0.622984	0.00351771
BCKDK	10295	branched chain keto acid dehydrogenase kinase	0.516548	0.0143049
BCL2L2-PABPN1	100529063	BCL2L2-PABPN1 readthrough	-1.0513	0.0263497
BCL7B	9275	BAF chromatin remodeling complex subunit BCL7B	-0.401564	0.011735
BCLAF1	9774	BCL2 associated transcription factor 1	-0.526911	0.0111017
BCYRN1	618	brain cytoplasmic RNA 1	-1.12859	0.00226274
BEND3	57673	BEN domain containing 3	-0.950763	0.0180288
BEX3	27018	brain expressed X-linked 3	0.413955	0.0289814
BHLHE40	8553	basic helix-loop-helix family member e40	0.510916	0.0337787
BHLHE41	79365	basic helix-loop-helix family member e41	0.843048	0.00480008
BICC1	80114	BicC family RNA binding protein 1	0.492199	0.0134989
BICDL2	146439	BICD family like cargo adaptor 2	3.59575	0.000389431
BID	637	BH3 interacting domain death agonist	-0.763393	0.00371504
BIN1	274	bridging integrator 1	-0.406073	0.0481532
BLCAP	10904	BLCAP apoptosis inducing factor	-0.433883	0.00793437
BLOC1S3	388552	biogenesis of lysosomal organelles complex 1 subunit 3	-0.441698	0.0276427
BMPR1B	658	bone morphogenetic protein receptor type 1B	-0.852757	0.0133932
BMPR2	659	bone morphogenetic protein receptor type 2	0.384776	0.0414152
BMS1	9790	BMS1 ribosome biogenesis factor	-0.437916	0.0166489
BNIP3	664	BCL2 interacting protein 3	1.2384	4.53218e-06
BNIP3L	665	BCL2 interacting protein 3 like	0.605985	0.00144441
BOP1	23246	BOP1 ribosomal biogenesis factor	-0.558647	0.00961544
BORCS5	118426	BLOC-1 related complex subunit 5	0.655724	0.0237549
BRD2	6046	bromodomain containing 2	-0.611627	0.00601509
BRD4	23476	bromodomain containing 4	-0.569921	0.0105997
BRIX1	55299	biogenesis of ribosomes BRX1	-0.586695	0.00872094
BRMS1	25855	BRMS1 transcriptional repressor and anoikis regulator	-0.399915	0.0306977
BST2	684	bone marrow stromal cell antigen 2	1.09159	0.0171185
BTBD2	55643	BTB domain containing 2	0.415734	0.0144434
BTBD7	55727	BTB domain containing 7	-0.566872	0.0210744
BTBD8	284697	BTB domain containing 8	1.13518	0.00756178
BTG1	694	BTG anti-proliferation factor 1	0.47811	0.0338162
BTG3	10950	BTG anti-proliferation factor 3	-0.350485	0.0384885
BTN3A3	10384	butyrophilin subfamily 3 member A3	0.788462	0.019469
BUB3	9184	BUB3 mitotic checkpoint protein	-0.377845	0.0314879
BUD23	114049	BUD23 rRNA methyltransferase and ribosome maturation factor	-0.38765	0.0399117
BYSL	705	bystin like	-0.556608	0.0392805
C12orf76	400073	chromosome 12 open reading frame 76	0.739153	0.00622286
C14orf132	56967	chromosome 14 open reading frame 132	0.719977	0.00327921
C15orf61	145853	chromosome 15 open reading frame 61	-0.618086	0.0387026
C19orf47	126526	chromosome 19 open reading frame 47	-0.558974	0.0183406
C19orf54	284325	chromosome 19 open reading frame 54	0.578394	0.0477826
C1orf216	127703	chromosome 1 open reading frame 216	-0.477202	0.0213282
C1orf50	79078	chromosome 1 open reading frame 50	1.20068	0.0120032
C1orf52	148423	chromosome 1 open reading frame 52	-0.814228	0.00168496
C1orf56	54964	chromosome 1 open reading frame 56	1.44287	0.0155814
C1RL	51279	complement C1r subcomponent like	0.759533	0.025086
C2orf81	388963	chromosome 2 open reading frame 81	1.17124	0.00941185
C3orf18	51161	chromosome 3 open reading frame 18	0.546431	0.0130228
C3orf52	79669	chromosome 3 open reading frame 52	-1.19823	0.0152265
C4orf3	401152	chromosome 4 open reading frame 3	0.935498	0.000350705
C4orf47	441054	chromosome 4 open reading frame 47	2.50292	0.000319457
C8orf33	65265	chromosome 8 open reading frame 33	-0.461018	0.0311193
CA12	771	carbonic anhydrase 12	1.51291	4.85418e-07
CA13	377677	carbonic anhydrase 13	-1.17282	0.0199028
CA9	768	carbonic anhydrase 9	3.62763	6.44271e-06
CACNG7	59284	calcium voltage-gated channel auxiliary subunit gamma 7	0.60132	0.0132745
CALHM2	51063	calcium homeostasis modulator family member 2	0.602548	0.026718
CAMKK1	84254	calcium/calmodulin dependent protein kinase kinase 1	-0.53932	0.0429027
CAPG	822	capping actin protein, gelsolin like	0.717517	0.00440563
CARHSP1	23589	calcium regulated heat stable protein 1	0.720963	0.000699783
CASC15	401237	cancer susceptibility 15	0.737541	0.04977
CASKIN2	57513	CASK interacting protein 2	-0.44048	0.0248047
CASP3	836	caspase 3	-0.455605	0.0319311
CBX4	8535	chromobox 4	-0.432257	0.0314088
CBX7	23492	chromobox 7	0.835235	0.0261057
CCDC102A	92922	coiled-coil domain containing 102A	0.634226	0.0136143
CCDC12	151903	coiled-coil domain containing 12	-0.578442	0.00896829
CCDC127	133957	coiled-coil domain containing 127	0.526199	0.0255862
CCDC18-AS1	100131564	CCDC18 antisense RNA 1	0.871072	0.0406238
CCDC184	387856	coiled-coil domain containing 184	0.968968	0.0448759
CCDC74B	91409	coiled-coil domain containing 74B	0.912437	0.0317802
CCDC8	83987	coiled-coil domain containing 8	0.80876	0.0377412
CCDC85B	11007	coiled-coil domain containing 85B	0.729374	0.0164914
CCL28	56477	C-C motif chemokine ligand 28	1.75589	0.00398381
CCNG2	901	cyclin G2	0.853451	0.00163772
CCNI	10983	cyclin I	0.440572	0.0357067
CCNJ	54619	cyclin J	-0.724209	0.0280233
CCNQ	92002	cyclin Q	-0.450214	0.0144993
CCS	9973	copper chaperone for superoxide dismutase	0.637317	0.0453848
CCT5	22948	chaperonin containing TCP1 subunit 5	-0.442318	0.00878624
CCZ1	51622	CCZ1 homolog, vacuolar protein trafficking and biogenesis associated	-0.449376	0.0124548
CD109	135228	CD109 molecule	0.846039	0.00477286
CD40	958	CD40 molecule	1.39586	0.00703241
CD46	4179	CD46 molecule	0.448727	0.0135359
CD68	968	CD68 molecule	0.534776	0.0151568
CDC123	8872	cell division cycle 123	-0.428356	0.0116684
CDC14B	8555	cell division cycle 14B	0.871045	0.0099704
CDC37	11140	cell division cycle 37	-0.410034	0.0156178
CDC42SE1	56882	CDC42 small effector 1	-0.324985	0.0479867
CDCA2	157313	cell division cycle associated 2	1.10821	0.0386117
CDCP1	64866	CUB domain containing protein 1	0.472964	0.0102806
CDK17	5128	cyclin dependent kinase 17	-0.466244	0.0478001
CDK5R1	8851	cyclin dependent kinase 5 regulatory subunit 1	-1.27917	0.0084776
CDK5RAP1	51654	CDK5 regulatory subunit associated protein 1	-0.690408	0.0160444
CDK5RAP2	55755	CDK5 regulatory subunit associated protein 2	-0.358434	0.0375309
CDK6	1021	cyclin dependent kinase 6	-0.363487	0.0425172
CDR2	1039	cerebellar degeneration related protein 2	-0.475296	0.0208281
CEBPD	1052	CCAAT enhancer binding protein delta	0.910207	0.00718599
CENPL	91687	centromere protein L	-0.652988	0.0418482
CENPX	201254	centromere protein X	-0.56283	0.0162982
CEP250	11190	centrosomal protein 250	0.79364	0.0270527
CEP290	80184	centrosomal protein 290	0.431897	0.0247348
CEP350	9857	centrosomal protein 350	0.59793	0.0363539
CEP57	9702	centrosomal protein 57	0.518422	0.0319077
CERS1	10715	ceramide synthase 1	0.760479	0.026285
CFAP20	29105	cilia and flagella associated protein 20	-0.474531	0.0153928
CFAP298	56683	cilia and flagella associated protein 298	-0.444123	0.00923596
CFAP36	112942	cilia and flagella associated protein 36	0.320814	0.0314479
CFAP69	79846	cilia and flagella associated protein 69	1.05082	0.0439203
CFB	629	complement factor B	-0.483034	0.0401815
CHAC1	79094	ChaC glutathione specific gamma-glutamylcyclotransferase 1	-0.693214	0.0455698
CHCHD10	400916	coiled-coil-helix-coiled-coil-helix domain containing 10	0.586209	0.0155607
CHD1	1105	chromodomain helicase DNA binding protein 1	-0.901656	0.00115172
CHERP	10523	calcium homeostasis endoplasmic reticulum protein	-0.357598	0.0497634
CHMP4B	128866	charged multivesicular body protein 4B	-0.262745	0.047416
CHMP7	91782	charged multivesicular body protein 7	-0.361859	0.047214
CHORDC1	26973	cysteine and histidine rich domain containing 1	-0.556868	0.0497401
CHSY3	337876	chondroitin sulfate synthase 3	-0.895118	0.0394849
CHURC1	91612	churchill domain containing 1	0.563779	0.0227386
CIAPIN1	57019	cytokine induced apoptosis inhibitor 1	-0.483344	0.0140776
CINP	51550	cyclin dependent kinase 2 interacting protein	0.299686	0.0407833
CKB	1152	creatine kinase B	0.896839	0.0191173
CKMT2	1160	creatine kinase, mitochondrial 2	1.44646	0.00600853
CKS2	1164	CDC28 protein kinase regulatory subunit 2	-0.679483	0.0345575
CLASP2	23122	cytoplasmic linker associated protein 2	-0.464553	0.0414285
CLDN15	24146	claudin 15	-1.11132	0.0195836
CLEC11A	6320	C-type lectin domain containing 11A	0.438875	0.0211454
CLEC2B	9976	C-type lectin domain family 2 member B	1.01615	0.0279801
CLIP3	25999	CAP-Gly domain containing linker protein 3	0.584526	0.00633246
CLN8	2055	CLN8 transmembrane ER and ERGIC protein	-0.513835	0.0339031
CLP1	10978	cleavage and polyadenylation factor I subunit 1	-0.59316	0.0123588
CLSTN3	9746	calsyntenin 3	1.08667	0.0108104
CLTB	1212	clathrin light chain B	-0.447717	0.0117433
CLUH	23277	clustered mitochondria homolog	-0.797388	0.000579623
CNKSR3	154043	CNKSR family member 3	-1.02559	0.0147742
CNN3	1266	calponin 3	0.601896	0.00696232
CNNM2	54805	cyclin and CBS domain divalent metal cation transport mediator 2	0.589831	0.0432496
CNOT7	29883	CCR4-NOT transcription complex subunit 7	0.499283	0.0281021
CNOT9	9125	CCR4-NOT transcription complex subunit 9	-0.437028	0.0201394
CNST	163882	consortin, connexin sorting protein	-0.442923	0.0135944
CNTNAP1	8506	contactin associated protein 1	0.411556	0.0121213
COG2	22796	component of oligomeric golgi complex 2	-0.55727	0.0129346
COL22A1	169044	collagen type XXII alpha 1 chain	0.729859	0.0221492
COL27A1	85301	collagen type XXVII alpha 1 chain	1.12942	0.0222064
COL8A2	1296	collagen type VIII alpha 2 chain	1.23622	0.000249699
COLEC12	81035	collectin subfamily member 12	0.645287	0.0335163
COMMD5	28991	COMM domain containing 5	-0.5057	0.0227175
COQ10B	80219	coenzyme Q10B	-0.536205	0.00897426
CORO1B	57175	coronin 1B	0.324428	0.0379991
CORO1C	23603	coronin 1C	-0.356748	0.0498862
COX11	1353	cytochrome c oxidase copper chaperone COX11	-0.386823	0.0490235
COX15	1355	cytochrome c oxidase assembly homolog COX15	0.405999	0.0434273
CPAMD8	27151	C3 and PZP like alpha-2-macroglobulin domain containing 8	1.83018	0.0314533
CPLANE1	65250	ciliogenesis and planar polarity effector 1	1.00166	0.00134736
CPNE3	8895	copine 3	0.463656	0.0216887
CPOX	1371	coproporphyrinogen oxidase	0.398298	0.0192501
CPSF6	11052	cleavage and polyadenylation specific factor 6	-0.407599	0.0122151
CPSF7	79869	cleavage and polyadenylation specific factor 7	-0.294633	0.0346226
CPT1A	1374	carnitine palmitoyltransferase 1A	-0.707169	0.00071863
CPXM2	119587	carboxypeptidase X, M14 family member 2	0.524343	0.00281039
CRAT	1384	carnitine O-acetyltransferase	0.382351	0.0431931
CRCP	27297	CGRP receptor component	-0.389931	0.0333182
CREM	1390	cAMP responsive element modulator	-0.383556	0.0362168
CSGALNACT2	55454	chondroitin sulfate N-acetylgalactosaminyltransferase 2	-0.668182	0.00409602
CSK	1445	C-terminal Src kinase	-0.456273	0.024036
CSNK1D	1453	casein kinase 1 delta	-0.338177	0.0201966
CSPG4	1464	chondroitin sulfate proteoglycan 4	0.822914	0.000499517
CSRNP1	64651	cysteine and serine rich nuclear protein 1	-0.626981	0.0317726
CTSK	1513	cathepsin K	0.876593	0.00174013
CTSL	1514	cathepsin L	-0.368152	0.0398817
CTSS	1520	cathepsin S	0.772814	0.0198202
CTTNBP2	83992	cortactin binding protein 2	0.973439	0.0379285
CUL4B	8450	cullin 4B	0.369073	0.029927
CUL7	9820	cullin 7	0.475343	0.00992066
CXCL16	58191	C-X-C motif chemokine ligand 16	0.939252	0.0337868
CXCL3	2921	C-X-C motif chemokine ligand 3	-0.798066	0.0433972
CXorf56	63932	chromosome X open reading frame 56	-0.49417	0.0478489
CYBC1	79415	cytochrome b-245 chaperone 1	0.429129	0.0174055
CYCS	54205	cytochrome c, somatic	-0.455104	0.0325202
CYP19A1	1588	cytochrome P450 family 19 subfamily A member 1	-1.28201	0.0195549
CYP27A1	1593	cytochrome P450 family 27 subfamily A member 1	1.24041	0.00543686
CYP51A1	1595	cytochrome P450 family 51 subfamily A member 1	0.56275	0.0314613
CYSLTR1	10800	cysteinyl leukotriene receptor 1	1.71159	0.00232347
DAP3	7818	death associated protein 3	-0.36559	0.0396424
DAPK3	1613	death associated protein kinase 3	-0.384724	0.0226893
DARS1	1615	aspartyl-tRNA synthetase 1	0.764796	0.000351839
DBI	1622	diazepam binding inhibitor, acyl-CoA binding protein	0.400871	0.0206115
DBP	1628	D-box binding PAR bZIP transcription factor	1.2851	0.013605
DCAF12	25853	DDB1 and CUL4 associated factor 12	-0.43557	0.021307
DCAF13	25879	DDB1 and CUL4 associated factor 13	-0.450109	0.0165488
DCAF7	10238	DDB1 and CUL4 associated factor 7	-0.363131	0.0136972
DCC	1630	DCC netrin 1 receptor	3.22634	0.000223411
DCHS1	8642	dachsous cadherin-related 1	0.744157	0.0205848
DCP1B	196513	decapping mRNA 1B	0.583344	0.00859381
DCTPP1	79077	dCTP pyrophosphatase 1	-0.539123	0.0186784
DCUN1D3	123879	defective in cullin neddylation 1 domain containing 3	-0.514362	0.0312797
DDA1	79016	DET1 and DDB1 associated 1	-0.493697	0.00758524
DDAH2	23564	dimethylarginine dimethylaminohydrolase 2	0.774081	0.000426805
DDIT4	54541	DNA damage inducible transcript 4	1.15494	0.000123216
DDR1	780	discoidin domain receptor tyrosine kinase 1	0.754025	0.00101814
DDT	1652	D-dopachrome tautomerase	0.350832	0.0194411
DDX20	11218	DEAD-box helicase 20	-0.465982	0.0393764
DDX21	9188	DExD-box helicase 21	-0.726561	0.00248179
DDX39A	10212	DExD-box helicase 39A	-0.955854	0.000399865
DDX39B	7919	DExD-box helicase 39B	-0.409889	0.0237667
DDX3X	1654	DEAD-box helicase 3 X-linked	-0.462019	0.031301
DDX41	51428	DEAD-box helicase 41	0.561655	0.0193908
DDX5	1655	DEAD-box helicase 5	-0.422091	0.0161339
DDX50	79009	DExD-box helicase 50	0.377546	0.0237229
DDX56	54606	DEAD-box helicase 56	-0.493863	0.0132835
DDX58	23586	DExD/H-box helicase 58	0.784141	0.0247837
DDX60L	91351	DExD/H-box 60 like	0.894478	0.0169424
DENND2A	27147	DENN domain containing 2A	1.50692	0.0193895
DENND6B	414918	DENN domain containing 6B	0.928689	0.0379182
DFFA	1676	DNA fragmentation factor subunit alpha	-0.393974	0.0287048
DGCR11	25786	DiGeorge syndrome critical region gene 11	-1.32352	0.0227753
DGLUCY	80017	D-glutamate cyclase	0.524361	0.0421578
DHCR7	1717	7-dehydrocholesterol reductase	0.723081	0.0157133
DHRS13	147015	dehydrogenase/reductase 13	0.965153	0.0111154
DHX16	8449	DEAH-box helicase 16	-0.426099	0.0345381
DHX30	22907	DExH-box helicase 30	-0.508502	0.00321185
DHX40	79665	DEAH-box helicase 40	0.511487	0.0339824
DHX9	1660	DExH-box helicase 9	-0.556449	0.0287144
DIAPH2	1730	diaphanous related formin 2	0.481702	0.0212263
DIPK1A	388650	divergent protein kinase domain 1A	0.511074	0.0317228
DKC1	1736	dyskerin pseudouridine synthase 1	-0.6541	0.000814553
DKK3	27122	dickkopf WNT signaling pathway inhibitor 3	0.675513	0.00291157
DLG4	1742	discs large MAGUK scaffold protein 4	0.477442	0.017865
DMAC1	90871	distal membrane arm assembly complex 1	0.638284	0.0269505
DNAJA1	3301	DnaJ heat shock protein family (Hsp40) member A1	-0.517701	0.0443464
DNAJB1	3337	DnaJ heat shock protein family (Hsp40) member B1	-0.771202	0.00990855
DNAJB6	10049	DnaJ heat shock protein family (Hsp40) member B6	-0.35852	0.041734
DNAJC18	202052	DnaJ heat shock protein family (Hsp40) member C18	0.755001	0.0235467
DNAJC2	27000	DnaJ heat shock protein family (Hsp40) member C2	-0.680515	0.0115319
DNAJC25	548645	DnaJ heat shock protein family (Hsp40) member C25	-0.401864	0.038424
DNAJC5	80331	DnaJ heat shock protein family (Hsp40) member C5	-0.406553	0.0201642
DNAL4	10126	dynein axonemal light chain 4	0.430048	0.0151744
DNALI1	7802	dynein axonemal light intermediate chain 1	0.891887	0.0138518
DNASE1L1	1774	deoxyribonuclease 1 like 1	0.563481	0.00177905
DNASE2	1777	deoxyribonuclease 2, lysosomal	0.360179	0.0378147
DNER	92737	delta/notch like EGF repeat containing	0.746396	0.0268963
DNTTIP2	30836	deoxynucleotidyltransferase terminal interacting protein 2	-0.496575	0.0102816
DOCK5	80005	dedicator of cytokinesis 5	-0.612392	0.0109259
DOK5	55816	docking protein 5	0.689019	0.00991042
DOLPP1	57171	dolichyldiphosphatase 1	-0.504579	0.0377136
DOT1L	84444	DOT1 like histone lysine methyltransferase	-0.80516	0.00999819
DPF3	8110	double PHD fingers 3	-1.19802	0.0436607
DPH6	89978	diphthamine biosynthesis 6	-0.966989	0.0346625
DPH7	92715	diphthamide biosynthesis 7	-0.631762	0.0179719
DPY19L3	147991	dpy-19 like C-mannosyltransferase 3	-0.490998	0.0109785
DRAM2	128338	DNA damage regulated autophagy modulator 2	0.770547	0.00175248
DRAXIN	374946	dorsal inhibitory axon guidance protein	1.63927	0.00452474
DTX3L	151636	deltex E3 ubiquitin ligase 3L	0.951273	0.0108847
DUS1L	64118	dihydrouridine synthase 1 like	-0.458498	0.0481362
DUSP14	11072	dual specificity phosphatase 14	-0.687773	0.000219565
DUSP15	128853	dual specificity phosphatase 15	3.67533	0.0112218
DUSP2	1844	dual specificity phosphatase 2	-2.36586	0.000732105
DUSP8	1850	dual specificity phosphatase 8	-1.95436	0.00198817
DVL2	1856	dishevelled segment polarity protein 2	0.448041	0.0275815
DYNC2LI1	51626	dynein cytoplasmic 2 light intermediate chain 1	0.57295	0.0404568
DYNLT3	6990	dynein light chain Tctex-type 3	0.484261	0.0101569
E2F3	1871	E2F transcription factor 3	-0.512356	0.00818638
E2F4	1874	E2F transcription factor 4	-0.531919	0.0378816
E2F6	1876	E2F transcription factor 6	-0.677819	0.00745545
E4F1	1877	E4F transcription factor 1	-0.49429	0.0220238
EAF1	85403	ELL associated factor 1	-0.645644	0.0190799
EBF4	57593	EBF family member 4	1.88323	0.0125284
EBNA1BP2	10969	EBNA1 binding protein 2	-0.524085	0.0161753
EBP	10682	EBP cholestenol delta-isomerase	0.600611	0.0468244
ECD	11319	ecdysoneless cell cycle regulator	-0.421648	0.00661231
ECH1	1891	enoyl-CoA hydratase 1	0.454382	0.0306004
EDIL3	10085	EGF like repeats and discoidin domains 3	0.50972	0.0355701
EEF1A2	1917	eukaryotic translation elongation factor 1 alpha 2	2.13544	0.000293009
EEF1AKMT4	110599564	EEF1A lysine methyltransferase 4	-0.857471	0.0145898
EEF1AKNMT	51603	eEF1A lysine and N-terminal methyltransferase	-0.423183	0.0377466
EFEMP1	2202	EGF containing fibulin extracellular matrix protein 1	-0.529989	0.0427826
EFHD2	79180	EF-hand domain family member D2	-0.613123	0.000830296
EFNA3	1944	ephrin A3	2.07814	0.00160848
EFS	10278	embryonal Fyn-associated substrate	0.911899	0.00800692
EGLN1	54583	egl-9 family hypoxia inducible factor 1	1.29504	5.54081e-06
EGR2	1959	early growth response 2	1.38605	0.0142971
EHD1	10938	EH domain containing 1	-0.661105	0.00110212
EHD2	30846	EH domain containing 2	0.376491	0.0370614
EHD4	30844	EH domain containing 4	-0.533918	0.0121662
EIF1AX	1964	eukaryotic translation initiation factor 1A X-linked	-0.467138	0.0480506
EIF2AK2	5610	eukaryotic translation initiation factor 2 alpha kinase 2	0.574965	0.044333
EIF3J	8669	eukaryotic translation initiation factor 3 subunit J	-0.490849	0.0192109
EIF4A2	1974	eukaryotic translation initiation factor 4A2	0.488312	0.0130165
EIF4A3	9775	eukaryotic translation initiation factor 4A3	-0.378392	0.0472623
EIF4E	1977	eukaryotic translation initiation factor 4E	-0.531254	0.0110097
EIF4G1	1981	eukaryotic translation initiation factor 4 gamma 1	-0.441808	0.0374785
EIF5A	1984	eukaryotic translation initiation factor 5A	-0.666809	0.00180643
EIF5B	9669	eukaryotic translation initiation factor 5B	-0.451182	0.00743824
EIF6	3692	eukaryotic translation initiation factor 6	-0.451499	0.00450766
ELN	2006	elastin	-1.1102	0.0443681
EMC8	10328	ER membrane protein complex subunit 8	-0.717684	0.00120674
EMC9	51016	ER membrane protein complex subunit 9	0.582781	0.0495678
EMG1	10436	EMG1 N1-specific pseudouridine methyltransferase	-0.519891	0.0297692
EMILIN1	11117	elastin microfibril interfacer 1	0.534156	0.0124912
EMILIN2	84034	elastin microfibril interfacer 2	0.760733	0.00880631
EMP1	2012	epithelial membrane protein 1	-0.556891	0.0169699
ENAH	55740	ENAH actin regulator	0.442656	0.0162721
ENO1	2023	enolase 1	0.46292	0.0177662
ENO2	2026	enolase 2	1.80153	3.11932e-07
ENTPD7	57089	ectonucleoside triphosphate diphosphohydrolase 7	-0.75468	0.000738023
EPB41L1	2036	erythrocyte membrane protein band 4.1 like 1	0.962013	0.00226263
EPHA2	1969	EPH receptor A2	-0.39092	0.0438929
EPOR	2057	erythropoietin receptor	0.625009	0.00933273
EPS15L1	58513	epidermal growth factor receptor pathway substrate 15 like 1	-0.421945	0.0278483
EPSTI1	94240	epithelial stromal interaction 1	1.69869	0.0152998
ERAP2	64167	endoplasmic reticulum aminopeptidase 2	0.577259	0.00513065
EREG	2069	epiregulin	-1.12552	0.0441188
ERH	2079	ERH mRNA splicing and mitosis factor	-0.385388	0.0200473
ERMP1	79956	endoplasmic reticulum metallopeptidase 1	1.10946	0.000248389
ERO1A	30001	endoplasmic reticulum oxidoreductase 1 alpha	0.997976	8.0371e-05
ERVK3-1	105372481	endogenous retrovirus group K3 member 1	-0.522827	0.0109613
ETS2	2114	ETS proto-oncogene 2, transcription factor	-0.972355	0.000482861
ETV1	2115	ETS variant transcription factor 1	0.622598	0.0110355
ETV3	2117	ETS variant transcription factor 3	-0.598489	0.0195986
ETV5	2119	ETS variant transcription factor 5	-0.58226	0.00823827
EVA1A	84141	eva-1 homolog A, regulator of programmed cell death	-0.892425	0.0261089
EWSR1	2130	EWS RNA binding protein 1	-0.567799	0.041405
EXOSC6	118460	exosome component 6	-0.432912	0.0390042
F2RL2	2151	coagulation factor II thrombin receptor like 2	-0.820186	0.0117476
F8	2157	coagulation factor VIII	0.678581	0.0293564
FABP3	2170	fatty acid binding protein 3	1.62896	0.0305216
FADD	8772	Fas associated via death domain	-0.40431	0.0288593
FADS2	9415	fatty acid desaturase 2	0.776771	0.00032666
FAF2	23197	Fas associated factor family member 2	-0.385271	0.0344166
FAM136A	84908	family with sequence similarity 136 member A	-0.49394	0.0103065
FAM13A	10144	family with sequence similarity 13 member A	0.971914	0.00194346
FAM13B	51306	family with sequence similarity 13 member B	-0.768106	0.0123015
FAM13C	220965	family with sequence similarity 13 member C	1.14032	0.048405
FAM149B1	317662	family with sequence similarity 149 member B1	0.437249	0.0332074
FAM162A	26355	family with sequence similarity 162 member A	1.6306	3.72535e-09
FAM168A	23201	family with sequence similarity 168 member A	0.506656	0.00604094
FAM227B	196951	family with sequence similarity 227 member B	1.05291	0.014191
FAM43A	131583	family with sequence similarity 43 member A	-0.579698	0.0409512
FAM83G	644815	family with sequence similarity 83 member G	-0.437092	0.0468442
FAM91A1	157769	family with sequence similarity 91 member A1	-0.517483	0.008011
FAM98A	25940	family with sequence similarity 98 member A	-0.737831	0.00125294
FARSB	10056	phenylalanyl-tRNA synthetase subunit beta	-0.520156	0.0224456
FASTKD5	60493	FAST kinase domains 5	-0.894723	0.00115215
FBXL18	80028	F-box and leucine rich repeat protein 18	-0.401706	0.0207358
FBXL20	84961	F-box and leucine rich repeat protein 20	0.420228	0.0240388
FBXL5	26234	F-box and leucine rich repeat protein 5	0.625603	0.0046711
FBXO27	126433	F-box protein 27	0.799124	0.0379028
FBXO30	84085	F-box protein 30	-0.562923	0.0309215
FBXO32	114907	F-box protein 32	1.20752	0.00443658
FBXO33	254170	F-box protein 33	-0.6217	0.0088916
FBXW4	6468	F-box and WD repeat domain containing 4	0.702149	0.0047878
FDFT1	2222	farnesyl-diphosphate farnesyltransferase 1	0.641537	0.00248193
FDPS	2224	farnesyl diphosphate synthase	0.565467	0.0234295
FECH	2235	ferrochelatase	-0.461738	0.0406261
FEM1A	55527	fem-1 homolog A	-0.588988	0.00551082
FEN1	2237	flap structure-specific endonuclease 1	-0.627021	0.0476764
FENDRR	400550	FOXF1 adjacent non-coding developmental regulatory RNA	0.58989	0.00864378
FER1L4	80307	fer-1 like family member 4 (pseudogene)	2.65274	0.00402373
FGF11	2256	fibroblast growth factor 11	3.36276	3.57587e-05
FGF13	2258	fibroblast growth factor 13	0.837339	0.0477306
FGFR1OP	11116	FGFR1 oncogene partner	0.397375	0.039662
FGFRL1	53834	fibroblast growth factor receptor like 1	0.559656	0.00475422
FHOD1	29109	formin homology 2 domain containing 1	-0.604615	0.0376722
FJX1	24147	four-jointed box kinase 1	-0.688803	0.0164543
FKBP14	55033	FKBP prolyl isomerase 14	-0.539653	0.044593
FLAD1	80308	flavin adenine dinucleotide synthetase 1	-0.560137	0.00372407
FLCN	201163	folliculin	-0.497915	0.0388787
FMOD	2331	fibromodulin	-0.761841	0.0433954
FNTB	2342	farnesyltransferase, CAAX box, beta	0.782606	0.00275615
FOSL1	8061	FOS like 1, AP-1 transcription factor subunit	-0.764506	0.00111973
FOSL2	2355	FOS like 2, AP-1 transcription factor subunit	0.415413	0.0258837
FRMD8	83786	FERM domain containing 8	-0.565232	0.0471688
FTSJ3	117246	FtsJ RNA 2'-O-methyltransferase 3	-0.459622	0.0273341
FUBP3	8939	far upstream element binding protein 3	-0.463082	0.00276467
FUS	2521	FUS RNA binding protein	-0.585939	0.0354278
FUT11	170384	fucosyltransferase 11	0.811776	0.000274862
FXR2	9513	FMR1 autosomal homolog 2	-0.463602	0.00538885
FXYD6	53826	FXYD domain containing ion transport regulator 6	2.33098	0.00165788
FYCO1	79443	FYVE and coiled-coil domain containing 1	0.788197	0.000810562
GABBR1	2550	gamma-aminobutyric acid type B receptor subunit 1	1.00049	0.00104205
GADD45G	10912	growth arrest and DNA damage inducible gamma	-1.51504	0.00600493
GAL3ST4	79690	galactose-3-O-sulfotransferase 4	1.32438	5.70537e-05
GALC	2581	galactosylceramidase	0.419136	0.0174266
GALNT5	11227	polypeptide N-acetylgalactosaminyltransferase 5	0.842753	0.0090375
GAMT	2593	guanidinoacetate N-methyltransferase	0.541626	0.0290977
GAPDH	2597	glyceraldehyde-3-phosphate dehydrogenase	0.536263	0.00318753
GAPVD1	26130	GTPase activating protein and VPS9 domains 1	-0.433593	0.0234997
GAR1	54433	GAR1 ribonucleoprotein	-0.567275	0.0209953
GART	2618	phosphoribosylglycinamide formyltransferase, phosphoribosylglycinamide synthetase, phosphoribosylaminoimidazole synthetase	-0.318097	0.048996
GATA2	2624	GATA binding protein 2	-1.03476	0.000419627
GATA6	2627	GATA binding protein 6	0.396075	0.037493
GATAD2A	54815	GATA zinc finger domain containing 2A	-0.472846	0.0312787
GATAD2B	57459	GATA zinc finger domain containing 2B	-0.616658	0.04769
GBE1	2632	1,4-alpha-glucan branching enzyme 1	1.06007	1.96375e-05
GBP2	2634	guanylate binding protein 2	1.11666	0.0214822
GCNT1	2650	glucosaminyl (N-acetyl) transferase 1	1.72788	0.0361299
GDF11	10220	growth differentiation factor 11	0.527561	0.0341152
GEMIN7	79760	gem nuclear organelle associated protein 7	-0.488984	0.0311662
GGA3	23163	golgi associated, gamma adaptin ear containing, ARF binding protein 3	-0.510149	0.0128155
GGH	8836	gamma-glutamyl hydrolase	0.455473	0.0109878
GLA	2717	galactosidase alpha	-0.564825	0.0136661
GLIPR2	152007	GLI pathogenesis related 2	0.613969	0.00582088
GLMP	112770	glycosylated lysosomal membrane protein	0.574761	0.00381699
GLYR1	84656	glyoxylate reductase 1 homolog	-0.491245	0.011309
GM2A	2760	GM2 ganglioside activator	0.671223	0.0010875
GMEB2	26205	glucocorticoid modulatory element binding protein 2	-0.389573	0.0372555
GMPR2	51292	guanosine monophosphate reductase 2	0.451088	0.0477694
GNAI1	2770	G protein subunit alpha i1	0.496882	0.0323523
GNL3L	54552	G protein nucleolar 3 like	-0.457032	0.0439959
GNPAT	8443	glyceronephosphate O-acyltransferase	0.446704	0.00370766
GNPNAT1	64841	glucosamine-phosphate N-acetyltransferase 1	-0.565123	0.0394182
GNPTAB	79158	N-acetylglucosamine-1-phosphate transferase subunits alpha and beta	0.413429	0.0295679
GOLGA5	9950	golgin A5	-0.271151	0.0467146
GPATCH2	55105	G-patch domain containing 2	-0.693809	0.0150978
GPATCH4	54865	G-patch domain containing 4	-0.958149	0.00127138
GPI	2821	glucose-6-phosphate isomerase	0.711221	0.00010544
GPNMB	10457	glycoprotein nmb	0.543565	0.0118918
GPR146	115330	G protein-coupled receptor 146	1.98174	5.33922e-05
GPR157	80045	G protein-coupled receptor 157	-0.741398	0.0259671
GPR68	8111	G protein-coupled receptor 68	-0.485274	0.0261106
GPRASP1	9737	G protein-coupled receptor associated sorting protein 1	1.11292	0.0437136
GPX3	2878	glutathione peroxidase 3	0.790615	0.000310461
GRB14	2888	growth factor receptor bound protein 14	1.11702	0.00610861
GRIN3B	116444	glutamate ionotropic receptor NMDA type subunit 3B	1.13895	0.0284977
GSDMD	79792	gasdermin D	0.688403	0.0495995
GSN	2934	gelsolin	0.528849	0.0338439
GSTM2	2946	glutathione S-transferase mu 2	0.581651	0.00872226
GSTM3	2947	glutathione S-transferase mu 3	0.577048	0.00895114
GSTM4	2948	glutathione S-transferase mu 4	0.416502	0.0476811
GTF2B	2959	general transcription factor IIB	-0.521738	0.0312888
GTF2H2	2966	general transcription factor IIH subunit 2	-0.661779	0.0242981
GTF3C6	112495	general transcription factor IIIC subunit 6	-0.350377	0.0378791
GXYLT2	727936	glucoside xylosyltransferase 2	0.814137	0.00929758
GYG2	8908	glycogenin 2	1.01635	0.0116438
GYS1	2997	glycogen synthase 1	1.3459	2.53093e-06
H1-0	3005	H1.0 linker histone	0.769068	0.00896566
H2AC19	723790	H2A clustered histone 19	0.571977	0.0394471
H2AC6	8334	H2A clustered histone 6	1.09932	0.00473747
H2AX	3014	H2A.X variant histone	-0.523643	0.0461481
H2BC20P	337873	H2B clustered histone 20, pseudogene	1.27866	0.0075216
H2BC4	8347	H2B clustered histone 4	1.06872	0.0430116
H2BC5	3017	H2B clustered histone 5	1.23263	0.0141245
H6PD	9563	hexose-6-phosphate dehydrogenase/glucose 1-dehydrogenase	0.657264	0.000949144
HADH	3033	hydroxyacyl-CoA dehydrogenase	0.711057	0.0120718
HAND2	9464	heart and neural crest derivatives expressed 2	0.868173	0.00371608
HAND2-AS1	79804	HAND2 antisense RNA 1	0.705709	0.00831826
HARS1	3035	histidyl-tRNA synthetase 1	-0.331243	0.036347
HARS2	23438	histidyl-tRNA synthetase 2, mitochondrial	0.324492	0.0425901
HAUS4	54930	HAUS augmin like complex subunit 4	0.65654	0.0411847
HBEGF	1839	heparin binding EGF like growth factor	-1.17947	0.0016531
HCCS	3052	holocytochrome c synthase	-0.453452	0.0412071
HCFC1R1	54985	host cell factor C1 regulator 1	1.60226	4.74204e-05
HEIH	100859930	hepatocellular carcinoma up-regulated EZH2-associated long non-coding RNA	0.577827	0.043181
HELZ2	85441	helicase with zinc finger 2	0.696096	0.0272076
HERC6	55008	HECT and RLD domain containing E3 ubiquitin protein ligase family member 6	1.60885	0.029505
HERPUD1	9709	homocysteine inducible ER protein with ubiquitin like domain 1	-0.459468	0.0140985
HEXIM1	10614	HEXIM P-TEFb complex subunit 1	-0.438293	0.0302905
HEXIM2	124790	HEXIM P-TEFb complex subunit 2	0.754273	0.0476295
HHIPL1	84439	HHIP like 1	0.598418	0.0250045
HHLA3	11147	HERV-H LTR-associating 3	0.773943	0.021267
HIBADH	11112	3-hydroxyisobutyrate dehydrogenase	0.457167	0.0338447
HIF3A	64344	hypoxia inducible factor 3 subunit alpha	2.0473	0.0195529
HILPDA	29923	hypoxia inducible lipid droplet associated	1.80016	8.32852e-06
HIRA	7290	histone cell cycle regulator	-0.286588	0.0345229
HK2	3099	hexokinase 2	0.985906	0.0100967
HLX	3142	H2.0 like homeobox	-0.500584	0.00928362
HMGB2	3148	high mobility group box 2	1.0159	0.00488347
HMGCL	3155	3-hydroxy-3-methylglutaryl-CoA lyase	0.568651	0.00593207
HNRNPAB	3182	heterogeneous nuclear ribonucleoprotein A/B	-0.787041	0.00129881
HNRNPH1	3187	heterogeneous nuclear ribonucleoprotein H1	-0.474872	0.0229417
HNRNPM	4670	heterogeneous nuclear ribonucleoprotein M	-0.457265	0.0147638
HOMEZ	57594	homeobox and leucine zipper encoding	0.731613	0.0276337
HOXA4	3201	homeobox A4	1.53925	0.0017709
HPS3	84343	HPS3 biogenesis of lysosomal organelles complex 2 subunit 1	0.420774	0.0472269
HSD17B10	3028	hydroxysteroid 17-beta dehydrogenase 10	-0.593428	0.00345907
HSD17B14	51171	hydroxysteroid 17-beta dehydrogenase 14	1.18329	0.0120246
HSD17B7	51478	hydroxysteroid 17-beta dehydrogenase 7	0.68211	0.0342262
HSPA14	51182	heat shock protein family A (Hsp70) member 14	-0.581033	0.0333085
HSPA1A	3303	heat shock protein family A (Hsp70) member 1A	-1.87314	0.000208386
HSPA1B	3304	heat shock protein family A (Hsp70) member 1B	-1.67163	0.000467725
HSPA1L	3305	heat shock protein family A (Hsp70) member 1 like	0.931832	0.0261053
HSPA4L	22824	heat shock protein family A (Hsp70) member 4 like	0.839542	0.0482857
HSPA6	3310	heat shock protein family A (Hsp70) member 6	-3.05733	0.000207916
HSPA7	3311	heat shock protein family A (Hsp70) member 7	-2.83909	0.00536603
HSPA9	3313	heat shock protein family A (Hsp70) member 9	-0.434581	0.0353219
HSPB11	51668	heat shock protein family B (small) member 11	0.477751	0.029794
HSPB7	27129	heat shock protein family B (small) member 7	1.89062	0.000522585
HSPB8	26353	heat shock protein family B (small) member 8	-0.892016	0.00133825
HSPH1	10808	heat shock protein family H (Hsp110) member 1	-0.785974	0.0132951
HTR7P1	93164	5-hydroxytryptamine receptor 7 pseudogene 1	-0.848137	0.027965
HVCN1	84329	hydrogen voltage gated channel 1	1.25345	0.0248527
IAH1	285148	isoamyl acetate hydrolyzing esterase 1 (putative)	0.509924	0.0180289
ICAM1	3383	intercellular adhesion molecule 1	-0.656687	0.00600351
ICAM5	7087	intercellular adhesion molecule 5	0.727384	0.0335354
ICE2	79664	interactor of little elongation complex ELL subunit 2	0.803835	0.0224469
ID2-AS1	100506299	ID2 antisense RNA 1	1.26999	0.00540068
IDI1	3422	isopentenyl-diphosphate delta isomerase 1	0.526752	0.030604
IER5	51278	immediate early response 5	-0.621079	0.0140243
IFI27	3429	interferon alpha inducible protein 27	1.24987	0.0106631
IFI35	3430	interferon induced protein 35	1.02054	0.00118992
IFI44	10561	interferon induced protein 44	0.910367	0.0374564
IFI44L	10964	interferon induced protein 44 like	2.58643	0.000128782
IFI6	2537	interferon alpha inducible protein 6	1.12456	9.14309e-05
IFIH1	64135	interferon induced with helicase C domain 1	1.88045	0.00188306
IFIT1	3434	interferon induced protein with tetratricopeptide repeats 1	4.29872	0.000102322
IFIT2	3433	interferon induced protein with tetratricopeptide repeats 2	3.34911	0.00107606
IFIT3	3437	interferon induced protein with tetratricopeptide repeats 3	2.31315	0.000352834
IFITM1	8519	interferon induced transmembrane protein 1	1.6931	0.000142565
IFRD2	7866	interferon related developmental regulator 2	-0.590995	0.00297233
IFT80	57560	intraflagellar transport 80	0.715288	0.00635
IFT81	28981	intraflagellar transport 81	0.695091	0.0301673
IGBP1	3476	immunoglobulin binding protein 1	0.415957	0.0157015
IGFBP1	3484	insulin like growth factor binding protein 1	1.71801	0.0444514
IL13RA2	3598	interleukin 13 receptor subunit alpha 2	0.598033	0.00130344
IL1A	3552	interleukin 1 alpha	-0.681817	0.0132328
IL21R	50615	interleukin 21 receptor	1.6421	0.00206416
IL23A	51561	interleukin 23 subunit alpha	-1.43156	0.0256267
IMP4	92856	IMP U3 small nucleolar ribonucleoprotein 4	-0.367323	0.0451606
INKA2	55924	inka box actin regulator 2	0.775712	0.0450814
INSIG2	51141	insulin induced gene 2	0.749812	0.00922285
IP6K1	9807	inositol hexakisphosphate kinase 1	-0.42319	0.0153024
IPMK	253430	inositol polyphosphate multikinase	0.631189	0.0301097
IRF2BP2	359948	interferon regulatory factor 2 binding protein 2	0.58224	0.00612416
IRF7	3665	interferon regulatory factor 7	0.912595	0.00981696
IRF9	10379	interferon regulatory factor 9	0.545101	0.0230075
ISG15	9636	ISG15 ubiquitin like modifier	1.21395	0.000971993
ISYNA1	51477	inositol-3-phosphate synthase 1	1.01077	0.0185506
ITGA1	3672	integrin subunit alpha 1	0.590919	0.0302303
ITGA5	3678	integrin subunit alpha 5	0.415244	0.0118884
ITGB3	3690	integrin subunit beta 3	0.687363	0.000121996
ITGBL1	9358	integrin subunit beta like 1	-0.587615	0.0218137
ITPKC	80271	inositol-trisphosphate 3-kinase C	-0.494796	0.0145882
ITPR1	3708	inositol 1,4,5-trisphosphate receptor type 1	1.13457	0.00100537
ITPR2	3709	inositol 1,4,5-trisphosphate receptor type 2	0.617851	0.0487112
ITPRIPL2	162073	ITPRIP like 2	-0.371916	0.0321949
JMJD6	23210	jumonji domain containing 6, arginine demethylase and lysine hydroxylase	-0.720607	0.0181123
KBTBD8	84541	kelch repeat and BTB domain containing 8	-1.54658	0.0017298
KCNE4	23704	potassium voltage-gated channel subfamily E regulatory subunit 4	0.922716	0.0222121
KCNMA1	3778	potassium calcium-activated channel subfamily M alpha 1	-0.488563	0.0218159
KCTD10	83892	potassium channel tetramerization domain containing 10	-0.385048	0.0338295
KCTD11	147040	potassium channel tetramerization domain containing 11	0.70487	0.000909987
KCTD16	57528	potassium channel tetramerization domain containing 16	0.798982	0.00813842
KCTD18	130535	potassium channel tetramerization domain containing 18	0.493006	0.0271348
KCTD5	54442	potassium channel tetramerization domain containing 5	-0.81472	0.000477953
KDM3A	55818	lysine demethylase 3A	0.672422	0.0193221
KDM4B	23030	lysine demethylase 4B	0.504382	0.0154402
KDM4C	23081	lysine demethylase 4C	0.672659	0.00570104
KIAA0319L	79932	KIAA0319 like	0.511975	0.0108226
KIF1B	23095	kinesin family member 1B	-0.349677	0.032912
KIRREL1	55243	kirre like nephrin family adhesion molecule 1	0.261788	0.0437589
KLC2	64837	kinesin light chain 2	-0.50335	0.00231142
KLF5	688	Kruppel like factor 5	-0.84907	0.0146243
KLF6	1316	Kruppel like factor 6	-0.652326	0.00591584
KLF7	8609	Kruppel like factor 7	0.55688	0.00852602
KLHDC3	116138	kelch domain containing 3	-0.373457	0.0414325
KLHDC7B	113730	kelch domain containing 7B	2.53913	0.0433986
KLHL18	23276	kelch like family member 18	-0.763635	0.0168113
KLHL21	9903	kelch like family member 21	-0.796254	0.0132363
KLHL25	64410	kelch like family member 25	-0.899589	0.0498029
KLLN	100144748	killin, p53 regulated DNA replication inhibitor	1.61417	0.0417179
KPNA2	3838	karyopherin subunit alpha 2	-0.700905	0.00496974
KRCC1	51315	lysine rich coiled-coil 1	0.420847	0.0386953
KRI1	65095	KRI1 homolog	-0.738762	0.0409947
KRIT1	889	KRIT1 ankyrin repeat containing	-0.421078	0.0298676
KRT10	3858	keratin 10	-0.447921	0.0174873
KRT18	3875	keratin 18	-1.01739	0.00259814
KY	339855	kyphoscoliosis peptidase	0.921762	0.023527
LAMA3	3909	laminin subunit alpha 3	1.42327	0.0456843
LAMB1	3912	laminin subunit beta 1	0.434184	0.0436228
LAMB3	3914	laminin subunit beta 3	0.695904	0.00661071
LANCL2	55915	LanC like 2	-0.567397	0.0268429
LARP1	23367	La ribonucleoprotein 1, translational regulator	-0.420954	0.0203026
LARP7	51574	La ribonucleoprotein 7, transcriptional regulator	-0.364325	0.0478563
LATS2	26524	large tumor suppressor kinase 2	-0.345521	0.0270776
LAYN	143903	layilin	0.536653	0.0359777
LCORL	254251	ligand dependent nuclear receptor corepressor like	0.601021	0.0317379
LDHA	3939	lactate dehydrogenase A	1.18368	9.35712e-06
LDHAP3	442013	lactate dehydrogenase A pseudogene 3	1.65806	0.000469585
LDHAP4	158222	lactate dehydrogenase A pseudogene 4	1.60572	0.000568853
LDHAP7	100190800	lactate dehydrogenase A pseudogene 7	1.1478	0.0103029
LENG9	94059	leukocyte receptor cluster member 9	0.75141	0.00496533
LEPR	3953	leptin receptor	1.01189	0.000704164
LETM1	3954	leucine zipper and EF-hand containing transmembrane protein 1	-0.569234	0.00511794
LIG3	3980	DNA ligase 3	0.658883	0.0229683
LIG4	3981	DNA ligase 4	-0.717683	0.00222041
LIMCH1	22998	LIM and calponin homology domains 1	1.10571	0.00373394
LIN37	55957	lin-37 DREAM MuvB core complex component	-0.52476	0.0258929
LINC00475	158314	long intergenic non-protein coding RNA 475	0.895329	0.0229084
LINC00641	283624	long intergenic non-protein coding RNA 641	-0.850673	0.0161174
LINC00680	106660612	long intergenic non-protein coding RNA 680	-0.890296	0.024203
LINC00847	729678	long intergenic non-protein coding RNA 847	0.716799	0.0250661
LINC00957	255031	long intergenic non-protein coding RNA 957	0.988222	0.0283248
LINC01133	100505633	long intergenic non-protein coding RNA 1133	-0.752007	0.0356413
LINC01232	102725509	long intergenic non-protein coding RNA 1232	1.12303	0.0184084
LINC01270	284751	long intergenic non-protein coding RNA 1270	1.44609	0.00841663
LINC02482	105374366	long intergenic non-protein coding RNA 2482	1.43327	0.0448087
LIPG	9388	lipase G, endothelial type	0.897614	0.00306271
LMTK2	22853	lemur tyrosine kinase 2	-0.508007	0.0198569
LNCOG	105369848	lncRNA osteogenesis associated	-1.51818	0.010151
LNPK	80856	lunapark, ER junction formation factor	0.594385	0.00352872
LOXL3	84695	lysyl oxidase like 3	0.770599	0.0273347
LOXL4	84171	lysyl oxidase like 4	0.783722	0.0387043
LPXN	9404	leupaxin	-0.465577	0.0325128
LRFN4	78999	leucine rich repeat and fibronectin type III domain containing 4	-0.610313	0.0497491
LRP11	84918	LDL receptor related protein 11	0.585414	0.00591903
LRRC17	10234	leucine rich repeat containing 17	0.802527	0.0228374
LRRC59	55379	leucine rich repeat containing 59	-0.604884	0.00330153
LRRC75B	388886	leucine rich repeat containing 75B	0.783288	0.0100046
LRRC8A	56262	leucine rich repeat containing 8 VRAC subunit A	-0.760297	0.000533055
LRTOMT	220074	leucine rich transmembrane and O-methyltransferase domain containing	0.865025	0.0490735
LRWD1	222229	leucine rich repeats and WD repeat domain containing 1	-0.508525	0.0219091
LSG1	55341	large 60S subunit nuclear export GTPase 1	-0.620589	0.00339047
LSP1P4	654342	LSP1 pseudogene 4	-0.886976	0.0118594
LSS	4047	lanosterol synthase	0.677567	0.0229662
LTA4H	4048	leukotriene A4 hydrolase	0.550335	0.0196038
LTBP1	4052	latent transforming growth factor beta binding protein 1	0.497826	0.0237878
LTV1	84946	LTV1 ribosome biogenesis factor	-0.557854	0.0147667
LUC7L	55692	LUC7 like	-0.790014	0.00500517
LUC7L3	51747	LUC7 like 3 pre-mRNA splicing factor	-0.504706	0.0257381
LUM	4060	lumican	0.701948	0.00358517
LUZP2	338645	leucine zipper protein 2	1.08861	0.0452793
LXN	56925	latexin	0.995716	0.026204
LY6E	4061	lymphocyte antigen 6 family member E	0.385666	0.0113266
LYAR	55646	Ly1 antibody reactive	-0.718037	0.0226859
LYN	4067	LYN proto-oncogene, Src family tyrosine kinase	-0.879428	0.042684
LYNX1	66004	Ly6/neurotoxin 1	0.624156	0.00523439
LYPLAL1	127018	lysophospholipase like 1	0.768508	0.00314982
MACO1	55219	macoilin 1	-0.562829	0.00247931
MAFG	4097	MAF bZIP transcription factor G	-0.698254	0.000713053
MAFK	7975	MAF bZIP transcription factor K	-0.588867	0.0254432
MAGEF1	64110	MAGE family member F1	-0.553752	0.0199033
MAK16	84549	MAK16 homolog	-0.797843	0.00117582
MANBA	4126	mannosidase beta	0.511202	0.0164574
MANBAL	63905	mannosidase beta like	-0.384385	0.0317792
MAOA	4128	monoamine oxidase A	1.89246	0.0163439
MAP2K3	5606	mitogen-activated protein kinase kinase 3	-0.753484	0.0114381
MAP2K5	5607	mitogen-activated protein kinase kinase 5	0.665589	0.0254776
MAP3K10	4294	mitogen-activated protein kinase kinase kinase 10	-0.579502	0.0121924
MAP3K2-DT	100506922	MAP3K2 divergent transcript	1.37684	0.0121747
MAP3K3	4215	mitogen-activated protein kinase kinase kinase 3	-0.460811	0.00417136
MAP3K6	9064	mitogen-activated protein kinase kinase kinase 6	0.806018	0.0411129
MAP6	4135	microtubule associated protein 6	0.837324	0.0427449
MAP7D1	55700	MAP7 domain containing 1	-0.47331	0.0172574
MAPK7	5598	mitogen-activated protein kinase 7	0.603685	0.000354042
MAPRE2	10982	microtubule associated protein RP/EB family member 2	0.433404	0.0200749
MARK2	2011	microtubule affinity regulating kinase 2	-0.466567	0.029906
MARK3	4140	microtubule affinity regulating kinase 3	-0.344131	0.028104
MARS1	4141	methionyl-tRNA synthetase 1	-0.693013	0.000997408
MAT2A	4144	methionine adenosyltransferase 2A	-0.438121	0.00388004
MAU2	23383	MAU2 sister chromatid cohesion factor	-0.443373	0.0241444
MAX	4149	MYC associated factor X	-0.507718	0.0062552
MBOAT2	129642	membrane bound O-acyltransferase domain containing 2	0.685343	0.00168459
MC1R	4157	melanocortin 1 receptor	0.994756	0.0201296
MCCC1	56922	methylcrotonoyl-CoA carboxylase 1	-0.957447	0.023425
MCOLN1	57192	mucolipin 1	-0.720534	0.0143045
MDK	4192	midkine	0.513571	0.00785001
ME3	10873	malic enzyme 3	1.11838	0.00536341
MED23	9439	mediator complex subunit 23	-0.396558	0.0255873
MED26	9441	mediator complex subunit 26	-0.703393	0.0199636
MEIS2	4212	Meis homeobox 2	0.542613	0.00882518
MEST	4232	mesoderm specific transcript	-0.968967	0.0350146
MET	4233	MET proto-oncogene, receptor tyrosine kinase	0.434803	0.0239619
METTL2B	55798	methyltransferase like 2B	-0.598738	0.0427896
MFAP5	8076	microfibril associated protein 5	-0.543155	0.013373
MFSD14B	84641	major facilitator superfamily domain containing 14B	-0.410185	0.0034811
MFSD2A	84879	major facilitator superfamily domain containing 2A	-1.83898	0.000123603
MFSD9	84804	major facilitator superfamily domain containing 9	-0.769955	0.0245611
MGAT5	4249	alpha-1,6-mannosylglycoprotein 6-beta-N-acetylglucosaminyltransferase	0.448538	0.0310309
MGLL	11343	monoglyceride lipase	-0.526913	0.0270121
MGST3	4259	microsomal glutathione S-transferase 3	0.371116	0.0234296
MHENCR	100505771	melanoma highly expressed competing endogenous lncRNA for miR-425 and miR-489	1.16864	0.0335925
MIA2	4253	MIA SH3 domain ER export factor 2	-0.3459	0.0345201
MICA	100507436	MHC class I polypeptide-related sequence A	0.338234	0.0240224
MICALL1	85377	MICAL like 1	-0.417433	0.0309629
MIF	4282	macrophage migration inhibitory factor	0.556173	0.00123744
MIGA2	84895	mitoguardin 2	-0.607305	0.0374236
MINDY1	55793	MINDY lysine 48 deubiquitinase 1	0.821994	0.025291
MIR100HG	399959	mir-100-let-7a-2-mir-125b-1 cluster host gene	0.582466	0.00156139
MIR210HG	100506211	MIR210 host gene	2.08998	8.04812e-05
MIR22HG	84981	MIR22 host gene	-0.905782	0.00890389
MIR31HG	554202	MIR31 host gene	0.488037	0.0223071
MIR3648-1	100500862	microRNA 3648-1	-2.75487	0.00141231
MLLT3	4300	MLLT3 super elongation complex subunit	1.12833	0.00426907
MMAB	326625	metabolism of cobalamin associated B	0.837431	0.0100706
MN1	4330	MN1 proto-oncogene, transcriptional regulator	0.828466	0.0229656
MOK	5891	MOK protein kinase	-0.478764	0.0419005
MON1A	84315	MON1 homolog A, secretory trafficking associated	-0.534263	0.0420841
MORN4	118812	MORN repeat containing 4	-0.880573	0.04647
MOSPD3	64598	motile sperm domain containing 3	0.649396	0.0230568
MOV10	4343	Mov10 RISC complex RNA helicase	0.661178	0.0201365
MPHOSPH10	10199	M-phase phosphoprotein 10	-0.479163	0.0223798
MPI	4351	mannose phosphate isomerase	0.678536	0.00356503
MPP2	4355	membrane palmitoylated protein 2	1.59696	3.43502e-05
MPV17	4358	mitochondrial inner membrane protein MPV17	0.420857	0.0291012
MPV17L2	84769	MPV17 mitochondrial inner membrane protein like 2	-0.852016	0.00251422
MROH6	642475	maestro heat like repeat family member 6	1.31379	0.0202637
MRPL30	51263	mitochondrial ribosomal protein L30	0.600884	0.0174888
MRPL35	51318	mitochondrial ribosomal protein L35	-0.47697	0.0103732
MRPL38	64978	mitochondrial ribosomal protein L38	-0.419201	0.00965877
MRPL4	51073	mitochondrial ribosomal protein L4	-0.478675	0.00467428
MRTO4	51154	MRT4 homolog, ribosome maturation factor	-0.405672	0.0435135
MSMO1	6307	methylsterol monooxygenase 1	0.898135	0.00191044
MSX1	4487	msh homeobox 1	-0.820884	0.00182726
MT1F	4494	metallothionein 1F	2.00859	0.0151325
MT1L	4500	metallothionein 1L, pseudogene	0.719407	0.0186571
MTA2	9219	metastasis associated 1 family member 2	-0.594606	0.00222054
MTERF1	7978	mitochondrial transcription termination factor 1	-0.539451	0.0482795
MTERF4	130916	mitochondrial transcription termination factor 4	-0.418435	0.0414634
MTFP1	51537	mitochondrial fission process 1	0.620507	0.046988
MTG2	26164	mitochondrial ribosome associated GTPase 2	-0.602569	0.00582032
MTHFD1L	25902	methylenetetrahydrofolate dehydrogenase (NADP+ dependent) 1 like	0.353001	0.0334774
MTIF3	219402	mitochondrial translational initiation factor 3	0.530067	0.00825662
MTRR	4552	5-methyltetrahydrofolate-homocysteine methyltransferase reductase	-0.676016	0.00852344
MUL1	79594	mitochondrial E3 ubiquitin protein ligase 1	-0.481119	0.0158847
MVD	4597	mevalonate diphosphate decarboxylase	0.690078	0.0316748
MX1	4599	MX dynamin like GTPase 1	2.40974	0.000529043
MXD1	4084	MAX dimerization protein 1	-0.73028	0.0212356
MXI1	4601	MAX interactor 1, dimerization protein	1.03568	0.000463182
MXRA5	25878	matrix remodeling associated 5	2.10894	0.000158513
MXRA7	439921	matrix remodeling associated 7	0.322116	0.0297977
MYBBP1A	10514	MYB binding protein 1a	-0.760621	0.00184279
MYCT1	80177	MYC target 1	-0.870378	0.00491062
MYL6B	140465	myosin light chain 6B	0.558119	0.00805906
MYOF	26509	myoferlin	0.567856	0.0143549
MYORG	57462	myogenesis regulating glycosidase (putative)	0.766085	0.0433241
NAA16	79612	N(alpha)-acetyltransferase 16, NatA auxiliary subunit	-0.660097	0.0164673
NAA25	80018	N(alpha)-acetyltransferase 25, NatB auxiliary subunit	-0.540487	0.0190209
NACAD	23148	NAC alpha domain containing	1.62202	2.68177e-05
NACC2	138151	NACC family member 2	-0.39475	0.0137797
NADK	65220	NAD kinase	-0.463594	0.00585409
NAGS	162417	N-acetylglutamate synthase	1.27177	0.020887
NANS	54187	N-acetylneuraminate synthase	-0.456235	0.0119422
NAPA	8775	NSF attachment protein alpha	-0.387341	0.0456799
NARF	26502	nuclear prelamin A recognition factor	0.898147	0.000130044
NATD1	256302	N-acetyltransferase domain containing 1	0.508051	0.0106227
NAV1	89796	neuron navigator 1	0.47227	0.0105261
NAV3	89795	neuron navigator 3	-0.845761	0.00333518
NBL1	4681	NBL1, DAN family BMP antagonist	0.668648	0.0133718
NCKAP5L	57701	NCK associated protein 5 like	-0.415008	0.0292288
NCLN	56926	nicalin	-0.533913	0.00892052
NCR3LG1	374383	natural killer cell cytotoxicity receptor 3 ligand 1	-0.644825	0.010704
NDEL1	81565	nudE neurodevelopment protein 1 like 1	-0.389788	0.0309759
NDNF	79625	neuron derived neurotrophic factor	2.06208	0.00121072
NDRG1	10397	N-myc downstream regulated 1	1.33527	0.000987617
NDRG4	65009	NDRG family member 4	0.704502	0.0377584
NECTIN1	5818	nectin cell adhesion molecule 1	-0.74376	0.00266233
NEGR1	257194	neuronal growth regulator 1	0.679461	0.0419813
NEO1	4756	neogenin 1	0.688089	0.008126
NEU1	4758	neuraminidase 1	0.404749	0.0418284
NFIX	4784	nuclear factor I X	0.51651	0.00326502
NFKB1	4790	nuclear factor kappa B subunit 1	-0.57452	0.00156227
NFKBIB	4793	NFKB inhibitor beta	-0.771416	0.004438
NHEJ1	79840	non-homologous end joining factor 1	0.538174	0.0437527
NINJ2-AS1	100049716	NINJ2 antisense RNA 1	1.12193	0.00319384
NIP7	51388	nucleolar pre-rRNA processing protein NIP7	-0.542153	0.0251485
NIPA1	123606	NIPA magnesium transporter 1	-0.400604	0.0229085
NIPA2	81614	NIPA magnesium transporter 2	-0.482385	0.0197301
NIPSNAP1	8508	nipsnap homolog 1	0.40579	0.0378832
NKIRAS2	28511	NFKB inhibitor interacting Ras like 2	-0.29205	0.0468664
NKX3-1	4824	NK3 homeobox 1	-1.01233	0.00316989
NLGN2	57555	neuroligin 2	0.532843	0.0215741
NMB	4828	neuromedin B	0.533742	0.0494608
NME3	4832	NME/NM23 nucleoside diphosphate kinase 3	0.500887	0.0330799
NME7	29922	NME/NM23 family member 7	0.49564	0.025188
NMRAL2P	344887	NmrA like redox sensor 2, pseudogene	-1.88427	0.00886942
NMT2	9397	N-myristoyltransferase 2	0.562653	0.0191276
NOC2L	26155	NOC2 like nucleolar associated transcriptional repressor	-0.428537	0.0241079
NOCT	25819	nocturnin	-0.731172	0.012902
NOL10	79954	nucleolar protein 10	-0.355188	0.0305999
NOL3	8996	nucleolar protein 3	0.965293	0.000244772
NOL6	65083	nucleolar protein 6	-0.873481	0.00326003
NOLC1	9221	nucleolar and coiled-body phosphoprotein 1	-0.494542	0.00822749
NOP14	8602	NOP14 nucleolar protein	-0.377284	0.0283115
NOP16	51491	NOP16 nucleolar protein	-0.905224	0.0058075
NOP2	4839	NOP2 nucleolar protein	-1.41627	1.19395e-05
NOP56	10528	NOP56 ribonucleoprotein	-0.894936	6.18962e-05
NOP58	51602	NOP58 ribonucleoprotein	-0.650309	0.00554288
NOTCH3	4854	notch receptor 3	0.549362	0.0301597
NOVA2	4858	NOVA alternative splicing regulator 2	0.894786	0.00571496
NPC2	10577	NPC intracellular cholesterol transporter 2	0.356084	0.049821
NPEPL1	79716	aminopeptidase like 1	0.50434	0.0182122
NPEPPS	9520	aminopeptidase puromycin sensitive	0.606822	0.00141325
NPLOC4	55666	NPL4 homolog, ubiquitin recognition factor	-0.606407	0.00209435
NPR2	4882	natriuretic peptide receptor 2	0.588838	0.0462764
NPR3	4883	natriuretic peptide receptor 3	1.38024	0.0028358
NPTXR	23467	neuronal pentraxin receptor	1.0335	0.00142077
NR2F2	7026	nuclear receptor subfamily 2 group F member 2	0.47556	0.0180627
NRSN2-AS1	100507459	NRSN2 antisense RNA 1	1.31781	0.00354072
NSMCE1	197370	NSE1 homolog, SMC5-SMC6 complex component	0.550827	0.013012
NSUN2	54888	NOP2/Sun RNA methyltransferase 2	-0.643698	0.00700199
NT5E	4907	5'-nucleotidase ecto	0.470469	0.00877679
NUDC	10726	nuclear distribution C, dynein complex regulator	-0.446982	0.024053
NUDT18	79873	nudix hydrolase 18	0.922824	0.000522435
NUDT19	390916	nudix hydrolase 19	-0.43492	0.0346612
NUDT2	318	nudix hydrolase 2	0.384342	0.0318744
NUDT21	11051	nudix hydrolase 21	0.499235	0.0444965
NUDT3	11165	nudix hydrolase 3	-0.756753	0.001421
NUP153	9972	nucleoporin 153	-0.552977	0.00741002
NUP205	23165	nucleoporin 205	-0.368157	0.0305794
NUP35	129401	nucleoporin 35	-0.967751	0.0136443
NUP50	10762	nucleoporin 50	-0.4701	0.040112
NUP54	53371	nucleoporin 54	-0.418606	0.0292914
NUP88	4927	nucleoporin 88	-0.610818	0.0206964
NXN	64359	nucleoredoxin	0.423494	0.0309049
NXT1	29107	nuclear transport factor 2 like export factor 1	-0.510931	0.0219415
NYNRIN	57523	NYN domain and retroviral integrase containing	1.36412	0.00237345
OAF	220323	out at first homolog	-0.625116	0.000848811
OAS1	4938	2'-5'-oligoadenylate synthetase 1	6.49723	2.71823e-05
OAS2	4939	2'-5'-oligoadenylate synthetase 2	4.20217	0.000308248
OAS3	4940	2'-5'-oligoadenylate synthetase 3	2.05581	0.00972991
OCEL1	79629	occludin/ELL domain containing 1	0.552726	0.0410781
ODC1	4953	ornithine decarboxylase 1	-0.687923	0.018017
OGFOD1	55239	2-oxoglutarate and iron dependent oxygenase domain containing 1	-0.606913	0.0101086
OIP5-AS1	729082	OIP5 antisense RNA 1	0.437268	0.0424885
OLFML2A	169611	olfactomedin like 2A	0.907654	0.0238922
OMA1	115209	OMA1 zinc metallopeptidase	0.647946	0.0238273
OPA1	4976	OPA1 mitochondrial dynamin like GTPase	-0.418324	0.0278887
OPLAH	26873	5-oxoprolinase, ATP-hydrolysing	1.34427	0.01346
OPN3	23596	opsin 3	0.814598	0.0266879
OPTN	10133	optineurin	0.376906	0.0499635
ORAI1	84876	ORAI calcium release-activated calcium modulator 1	-0.490935	0.0179802
ORAI3	93129	ORAI calcium release-activated calcium modulator 3	1.1615	1.00116e-05
OSER1-DT	100505783	OSER1 divergent transcript	1.06617	0.0121414
OSMR	9180	oncostatin M receptor	0.333213	0.0402282
P4HA1	5033	prolyl 4-hydroxylase subunit alpha 1	0.529248	0.0472901
P4HA3	283208	prolyl 4-hydroxylase subunit alpha 3	0.65843	0.0152586
PAFAH1B3	5050	platelet activating factor acetylhydrolase 1b catalytic subunit 3	0.804736	0.013075
PAICS	10606	phosphoribosylaminoimidazole carboxylase and phosphoribosylaminoimidazolesuccinocarboxamide synthase	0.357926	0.0310874
PALM2AKAP2	445815	PALM2 and AKAP2 fusion	-0.446703	0.0356833
PAM	5066	peptidylglycine alpha-amidating monooxygenase	0.571443	0.00100102
PAMR1	25891	peptidase domain containing associated with muscle regeneration 1	0.35339	0.041684
PANX2	56666	pannexin 2	-0.45793	0.0342292
PAPPA	5069	pappalysin 1	0.763515	0.0167134
PAPPA2	60676	pappalysin 2	-0.805244	0.029975
PAQR7	164091	progestin and adipoQ receptor family member 7	0.517595	0.0100522
PAQR8	85315	progestin and adipoQ receptor family member 8	1.08198	0.0239252
PARP10	84875	poly(ADP-ribose) polymerase family member 10	0.690911	0.00651439
PARP14	54625	poly(ADP-ribose) polymerase family member 14	0.888249	0.00369093
PARP9	83666	poly(ADP-ribose) polymerase family member 9	1.16668	0.00121715
PATJ	10207	PATJ crumbs cell polarity complex component	1.13905	0.0390137
PBX3	5090	PBX homeobox 3	0.517264	0.0420269
PBXIP1	57326	PBX homeobox interacting protein 1	0.508026	0.0141152
PC	5091	pyruvate carboxylase	0.764557	0.0254444
PCAT6	100506696	prostate cancer associated transcript 6	0.939843	0.0383429
PCDH7	5099	protocadherin 7	0.64318	0.0446413
PCDH9	5101	protocadherin 9	-1.30094	0.000678896
PCDHGB1	56104	protocadherin gamma subfamily B, 1	1.28928	0.0114078
PCED1A	64773	PC-esterase domain containing 1A	0.92761	0.00843062
PCLAF	9768	PCNA clamp associated factor	1.43388	0.0142246
PCMTD1	115294	protein-L-isoaspartate (D-aspartate) O-methyltransferase domain containing 1	0.482333	0.0166806
PCNX2	80003	pecanex 2	0.859914	0.0322288
PCNX3	399909	pecanex 3	-0.456281	0.0311793
PCSK9	255738	proprotein convertase subtilisin/kexin type 9	0.940331	0.0122667
PCYOX1	51449	prenylcysteine oxidase 1	0.672472	0.000897806
PDE4A	5141	phosphodiesterase 4A	0.529244	0.00699928
PDE4C	5143	phosphodiesterase 4C	3.06997	0.00520199
PDE5A	8654	phosphodiesterase 5A	0.771753	0.035217
PDGFA	5154	platelet derived growth factor subunit A	-0.792299	0.0141814
PDGFC	56034	platelet derived growth factor C	0.505342	0.0279146
PDK1	5163	pyruvate dehydrogenase kinase 1	0.833526	0.00124624
PDK3	5165	pyruvate dehydrogenase kinase 3	1.40635	2.4392e-05
PDLIM1	9124	PDZ and LIM domain 1	0.576166	0.00132342
PDPK1	5170	3-phosphoinositide dependent protein kinase 1	-0.850504	0.00369828
PDPR	55066	pyruvate dehydrogenase phosphatase regulatory subunit	0.445276	0.0244403
PDRG1	81572	p53 and DNA damage regulated 1	-0.786103	0.0111675
PECR	55825	peroxisomal trans-2-enoyl-CoA reductase	1.21011	0.00455197
PERP	64065	p53 apoptosis effector related to PMP22	0.397875	0.039274
PFDN2	5202	prefoldin subunit 2	-0.508151	0.00341043
PFKFB3	5209	6-phosphofructo-2-kinase/fructose-2,6-biphosphatase 3	0.851461	0.00700999
PFKFB4	5210	6-phosphofructo-2-kinase/fructose-2,6-biphosphatase 4	1.49375	2.12395e-05
PFKL	5211	phosphofructokinase, liver type	0.666403	0.000714823
PFKP	5214	phosphofructokinase, platelet	0.585125	0.00126769
PGAM1	5223	phosphoglycerate mutase 1	0.512899	0.00830092
PGK1	5230	phosphoglycerate kinase 1	0.90362	0.000260972
PGM1	5236	phosphoglucomutase 1	0.758115	0.000516532
PGM3	5238	phosphoglucomutase 3	-0.406721	0.0289758
PHF21A	51317	PHD finger protein 21A	0.610457	0.00340809
PHLDA2	7262	pleckstrin homology like domain family A member 2	-0.761529	0.00290689
PHYH	5264	phytanoyl-CoA 2-hydroxylase	0.467648	0.0382632
PI16	221476	peptidase inhibitor 16	-1.2518	0.0389206
PI4K2A	55361	phosphatidylinositol 4-kinase type 2 alpha	-0.413835	0.0147486
PI4KB	5298	phosphatidylinositol 4-kinase beta	-0.382037	0.00754437
PIGP	51227	phosphatidylinositol glycan anchor biosynthesis class P	0.568764	0.0482593
PIGV	55650	phosphatidylinositol glycan anchor biosynthesis class V	0.850919	0.00020215
PIGW	284098	phosphatidylinositol glycan anchor biosynthesis class W	-0.875361	0.0306545
PIK3R2	5296	phosphoinositide-3-kinase regulatory subunit 2	0.32173	0.0383027
PIK3R3	8503	phosphoinositide-3-kinase regulatory subunit 3	-0.797184	0.0281017
PIM3	415116	Pim-3 proto-oncogene, serine/threonine kinase	-0.685094	0.0028103
PIP4K2A	5305	phosphatidylinositol-5-phosphate 4-kinase type 2 alpha	-0.404751	0.0220984
PISD	23761	phosphatidylserine decarboxylase	-0.701879	0.00795789
PITHD1	57095	PITH domain containing 1	-0.659685	0.000280916
PITPNA	5306	phosphatidylinositol transfer protein alpha	-0.43626	0.00693406
PITPNB	23760	phosphatidylinositol transfer protein beta	-0.444517	0.024444
PITRM1	10531	pitrilysin metallopeptidase 1	-0.455881	0.0082815
PKM	5315	pyruvate kinase M1/2	0.348392	0.0397159
PLA2G15	23659	phospholipase A2 group XV	0.608542	0.00416194
PLA2R1	22925	phospholipase A2 receptor 1	0.893249	0.0250797
PLAAT3	11145	phospholipase A and acyltransferase 3	0.663123	0.0412818
PLAU	5328	plasminogen activator, urokinase	-0.744492	0.00577903
PLCD1	5333	phospholipase C delta 1	0.886703	0.0114015
PLD2	5338	phospholipase D2	0.466918	0.0465774
PLEKHA2	59339	pleckstrin homology domain containing A2	0.885262	0.000326021
PLEKHA4	57664	pleckstrin homology domain containing A4	0.663106	0.0322317
PLEKHB2	55041	pleckstrin homology domain containing B2	-0.61497	0.00562384
PLOD2	5352	procollagen-lysine,2-oxoglutarate 5-dioxygenase 2	0.973521	0.00181211
PLPP2	8612	phospholipid phosphatase 2	0.638032	0.0144055
PLSCR1	5359	phospholipid scramblase 1	0.73047	0.00114881
PLXNA2	5362	plexin A2	-1.13845	0.0128939
PMAIP1	5366	phorbol-12-myristate-13-acetate-induced protein 1	-0.539836	0.0346055
PMM1	5372	phosphomannomutase 1	0.554047	0.00453481
PMM2	5373	phosphomannomutase 2	-0.377203	0.0350083
PMPCB	9512	peptidase, mitochondrial processing beta subunit	0.334243	0.0189088
PNMA8A	55228	PNMA family member 8A	1.72238	0.00437959
PNN	5411	pinin, desmosome associated protein	-0.612046	0.00832198
PNO1	56902	partner of NOB1 homolog	-0.765192	0.0124446
PNP	4860	purine nucleoside phosphorylase	-1.10631	0.00094687
PNPLA8	50640	patatin like phospholipase domain containing 8	-0.406988	0.0465078
POGLUT3	143888	protein O-glucosyltransferase 3	0.441037	0.0200955
POLD4	57804	DNA polymerase delta 4, accessory subunit	0.527219	0.0157657
POLE3	54107	DNA polymerase epsilon 3, accessory subunit	-0.3838	0.0310637
POLI	11201	DNA polymerase iota	0.384759	0.0405638
POLL	27343	DNA polymerase lambda	0.566537	0.00414271
POLR1A	25885	RNA polymerase I subunit A	-0.547258	0.0169053
POLR1C	9533	RNA polymerase I and III subunit C	-0.615509	0.0421583
POLR3A	11128	RNA polymerase III subunit A	-0.494225	0.00967049
POLRMT	5442	RNA polymerase mitochondrial	-0.549882	0.00946069
POM121	9883	POM121 transmembrane nucleoporin	-0.539691	0.00345062
POMP	51371	proteasome maturation protein	-0.447348	0.026377
POP7	10248	POP7 homolog, ribonuclease P/MRP subunit	-0.438871	0.0342666
PPAN-P2RY11	692312	PPAN-P2RY11 readthrough	-2.39349	0.0417491
PPCS	79717	phosphopantothenoylcysteine synthetase	0.512447	0.0111308
PPIF	10105	peptidylprolyl isomerase F	-0.908856	0.000512512
PPIL3	53938	peptidylprolyl isomerase like 3	0.665664	0.0100262
PPM1G	5496	protein phosphatase, Mg2+/Mn2+ dependent 1G	-0.29459	0.0371946
PPM1M	132160	protein phosphatase, Mg2+/Mn2+ dependent 1M	0.587288	0.00351672
PPME1	51400	protein phosphatase methylesterase 1	0.408676	0.00496328
PPP1R10	5514	protein phosphatase 1 regulatory subunit 10	-0.361131	0.0369377
PPP1R13L	10848	protein phosphatase 1 regulatory subunit 13 like	1.01245	0.00502395
PPP1R15A	23645	protein phosphatase 1 regulatory subunit 15A	-0.761726	0.0139343
PPP1R15B	84919	protein phosphatase 1 regulatory subunit 15B	-0.387712	0.0209157
PPP1R21	129285	protein phosphatase 1 regulatory subunit 21	0.764062	0.00115276
PPP1R37	284352	protein phosphatase 1 regulatory subunit 37	-0.325078	0.0389352
PPP1R3B	79660	protein phosphatase 1 regulatory subunit 3B	0.650939	0.00948959
PPP1R3C	5507	protein phosphatase 1 regulatory subunit 3C	1.72077	8.0153e-07
PPP1R3G	648791	protein phosphatase 1 regulatory subunit 3G	2.05735	3.698e-05
PPP2R3C	55012	protein phosphatase 2 regulatory subunit B''gamma	0.48086	0.0304859
PPP2R5A	5525	protein phosphatase 2 regulatory subunit B'alpha	0.374056	0.0477339
PPP5C	5536	protein phosphatase 5 catalytic subunit	-0.355876	0.0419785
PRCC	5546	proline rich mitotic checkpoint control factor	-0.476239	0.007204
PRDX1	5052	peroxiredoxin 1	-0.482243	0.0201732
PRDX2	7001	peroxiredoxin 2	0.397896	0.0103526
PRELID1	27166	PRELI domain containing 1	-0.420893	0.0115362
PRELID2	153768	PRELI domain containing 2	1.3708	0.016306
PREPL	9581	prolyl endopeptidase like	0.560422	0.0181155
PRKAR2A-AS1	100506637	PRKAR2A antisense RNA 1	1.50096	0.0467779
PRKG2	5593	protein kinase cGMP-dependent 2	1.0595	0.0339338
PRMT2	3275	protein arginine methyltransferase 2	0.375762	0.0112552
PROCR	10544	protein C receptor	0.407964	0.0263253
PRPF19	27339	pre-mRNA processing factor 19	-0.340483	0.0398324
PRPF38B	55119	pre-mRNA processing factor 38B	-0.592858	0.00191193
PRPF4	9128	pre-mRNA processing factor 4	-0.3995	0.0167858
PRPF4B	8899	pre-mRNA processing factor 4B	-0.465428	0.0306966
PRRC2C	23215	proline rich coiled-coil 2C	-0.414044	0.0418987
PRTFDC1	56952	phosphoribosyl transferase domain containing 1	1.02301	0.00102502
PRUNE2	158471	prune homolog 2 with BCH domain	1.22434	0.0342944
PRXL2A	84293	peroxiredoxin like 2A	1.52824	0.000401603
PSAT1	29968	phosphoserine aminotransferase 1	-0.9856	0.00635303
PSD	5662	pleckstrin and Sec7 domain containing	0.918393	0.036417
PSD3	23362	pleckstrin and Sec7 domain containing 3	0.758656	0.0056844
PSG4	5672	pregnancy specific beta-1-glycoprotein 4	0.532197	0.0293761
PSMA3	5684	proteasome 20S subunit alpha 3	-0.403138	0.0345008
PSMA4	5685	proteasome 20S subunit alpha 4	-0.378263	0.0462813
PSMA5	5686	proteasome 20S subunit alpha 5	-0.375134	0.0258073
PSMA7	5688	proteasome 20S subunit alpha 7	-0.357386	0.0260267
PSMB2	5690	proteasome 20S subunit beta 2	-0.52569	0.00454958
PSMB3	5691	proteasome 20S subunit beta 3	-0.45976	0.0124764
PSMB6	5694	proteasome 20S subunit beta 6	-0.467965	0.00748202
PSMB8	5696	proteasome 20S subunit beta 8	0.478682	0.0135316
PSMB9	5698	proteasome 20S subunit beta 9	1.37352	0.0335889
PSMC1	5700	proteasome 26S subunit, ATPase 1	-0.442145	0.0236455
PSMC2	5701	proteasome 26S subunit, ATPase 2	-0.45996	0.0105928
PSMC3	5702	proteasome 26S subunit, ATPase 3	-0.519115	0.00397769
PSMC4	5704	proteasome 26S subunit, ATPase 4	-0.657192	0.000390724
PSMC5	5705	proteasome 26S subunit, ATPase 5	-0.402442	0.00585936
PSMD1	5707	proteasome 26S subunit, non-ATPase 1	-0.607185	0.000541968
PSMD12	5718	proteasome 26S subunit, non-ATPase 12	-0.549898	0.0212573
PSMD13	5719	proteasome 26S subunit, non-ATPase 13	-0.49465	0.0113155
PSMD14	10213	proteasome 26S subunit, non-ATPase 14	-0.566875	0.00774668
PSMD2	5708	proteasome 26S subunit, non-ATPase 2	-0.480182	0.0060484
PSMD3	5709	proteasome 26S subunit, non-ATPase 3	-0.541708	0.000888041
PSMD6	9861	proteasome 26S subunit, non-ATPase 6	-0.421265	0.0241051
PSMD8	5714	proteasome 26S subunit, non-ATPase 8	-0.38484	0.0181896
PSME1	5720	proteasome activator subunit 1	0.324582	0.0330468
PSME4	23198	proteasome activator subunit 4	-0.674082	0.000165988
PTBP1	5725	polypyrimidine tract binding protein 1	-0.376298	0.0261143
PTEN	5728	phosphatase and tensin homolog	0.80532	0.00488443
PTGFR	5737	prostaglandin F receptor	0.814294	0.0209643
PTGIS	5740	prostaglandin I2 synthase	1.77884	4.87371e-06
PTK2B	2185	protein tyrosine kinase 2 beta	1.28901	0.0301374
PTPN1	5770	protein tyrosine phosphatase non-receptor type 1	-0.607744	0.000656407
PTPRB	5787	protein tyrosine phosphatase receptor type B	1.43522	0.000284664
PTPRH	5794	protein tyrosine phosphatase receptor type H	2.32841	0.0018528
PTPRS	5802	protein tyrosine phosphatase receptor type S	0.487875	0.0288974
PTRH2	51651	peptidyl-tRNA hydrolase 2	-0.526808	0.00978479
PTS	5805	6-pyruvoyltetrahydropterin synthase	-0.497095	0.027582
PUF60	22827	poly(U) binding splicing factor 60	-0.38293	0.0318583
PUS1	80324	pseudouridine synthase 1	-0.600493	0.015511
PVR	5817	PVR cell adhesion molecule	-0.552342	0.00122058
PXDC1	221749	PX domain containing 1	-0.469523	0.0187849
PYCARD	29108	PYD and CARD domain containing	1.13155	0.000329382
PYCR1	5831	pyrroline-5-carboxylate reductase 1	-0.379086	0.0467478
PYGB	5834	glycogen phosphorylase B	-0.446768	0.0190095
PYGL	5836	glycogen phosphorylase L	0.80341	0.0014344
QPCT	25797	glutaminyl-peptide cyclotransferase	1.01818	0.000724654
QPRT	23475	quinolinate phosphoribosyltransferase	1.64662	0.000266351
QRICH1	54870	glutamine rich 1	-0.412962	0.021814
R3HDM4	91300	R3H domain containing 4	-0.519139	0.00372555
RAB13	5872	RAB13, member RAS oncogene family	0.542524	0.00288365
RAB20	55647	RAB20, member RAS oncogene family	1.24674	0.000835758
RAB35	11021	RAB35, member RAS oncogene family	-0.467686	0.00859217
RAB3D	9545	RAB3D, member RAS oncogene family	1.14376	0.00167137
RAB5IF	55969	RAB5 interacting factor	-0.550046	0.00609573
RAB7A	7879	RAB7A, member RAS oncogene family	-0.361232	0.0382567
RAB8B	51762	RAB8B, member RAS oncogene family	0.693414	0.0339284
RAD51B	5890	RAD51 paralog B	1.40128	0.00923492
RAF1	5894	Raf-1 proto-oncogene, serine/threonine kinase	-0.305371	0.0402789
RALGAPA2	57186	Ral GTPase activating protein catalytic alpha subunit 2	0.910847	0.00796337
RAPGEF2	9693	Rap guanine nucleotide exchange factor 2	-0.534263	0.0125737
RARRES2	5919	retinoic acid receptor responder 2	-1.14572	0.0472792
RASA2	5922	RAS p21 protein activator 2	-0.382764	0.0412946
RASA3	22821	RAS p21 protein activator 3	-0.497569	0.00425648
RASA4	10156	RAS p21 protein activator 4	0.962699	0.00199955
RASSF3	283349	Ras association domain family member 3	-0.420763	0.0415118
RBFADN	100506070	RBFA downstream neighbor	1.29911	0.0478819
RBM19	9904	RNA binding motif protein 19	-0.497723	0.0198824
RBM24	221662	RNA binding motif protein 24	-1.08082	0.0155903
RBM25	58517	RNA binding motif protein 25	-0.641881	0.00114836
RBM3	5935	RNA binding motif protein 3	-0.565171	0.00952767
RBM42	79171	RNA binding motif protein 42	-0.334712	0.0375296
RBM43	375287	RNA binding motif protein 43	0.943221	0.0228073
RBPJ	3516	recombination signal binding protein for immunoglobulin kappa J region	0.395126	0.0219166
RBPMS	11030	RNA binding protein, mRNA processing factor	0.424496	0.0333123
RBSN	64145	rabenosyn, RAB effector	-0.41112	0.0484819
RCBTB2	1102	RCC1 and BTB domain containing protein 2	0.957246	0.00535512
REEP2	51308	receptor accessory protein 2	0.646653	0.0194296
RGMB	285704	repulsive guidance molecule BMP co-receptor b	-0.641118	0.000267644
RGN	9104	regucalcin	1.92291	0.00362048
RHBDD3	25807	rhomboid domain containing 3	-0.599612	0.0134606
RHBDF1	64285	rhomboid 5 homolog 1	-0.616657	0.0287111
RHBDF2	79651	rhomboid 5 homolog 2	0.622834	0.0128688
RHOBTB3	22836	Rho related BTB domain containing 3	0.535889	0.00918207
RHOF	54509	ras homolog family member F, filopodia associated	0.528882	0.0454124
RILP	83547	Rab interacting lysosomal protein	0.898941	0.00977173
RIN2	54453	Ras and Rab interactor 2	-0.429444	0.0467764
RIOX2	84864	ribosomal oxygenase 2	-0.448064	0.0367422
RIPK1	8737	receptor interacting serine/threonine kinase 1	-0.400494	0.00568723
RIT1	6016	Ras like without CAAX 1	-0.584183	0.0165809
RNASE4	6038	ribonuclease A family member 4	0.624473	0.0103009
RNASEH1	246243	ribonuclease H1	-0.457223	0.0173829
RNASEH2C	84153	ribonuclease H2 subunit C	0.597073	0.0388116
RNF112	7732	ring finger protein 112	1.48281	0.0145004
RNF126	55658	ring finger protein 126	-0.623932	0.00478525
RNF128	79589	ring finger protein 128	0.917599	0.00828198
RNF13	11342	ring finger protein 13	-0.427512	0.0184593
RNF141	50862	ring finger protein 141	0.500045	0.0491756
RNF150	57484	ring finger protein 150	1.97702	0.0256754
RNF208	727800	ring finger protein 208	1.1899	0.0220832
RNF25	64320	ring finger protein 25	-0.508943	0.0056126
RNPS1	10921	RNA binding protein with serine rich domain 1	-0.459416	0.00208209
RP9	6100	RP9 pre-mRNA splicing factor	-0.485647	0.0227199
RPA3	6119	replication protein A3	0.59465	0.0416107
RRAGD	58528	Ras related GTP binding D	1.53679	0.0414408
RRAS	6237	RAS related	0.640219	0.00131158
RRAS2	22800	RAS related 2	-0.404411	0.0321524
RRP1	8568	ribosomal RNA processing 1	-0.473244	0.0461544
RRP12	23223	ribosomal RNA processing 12 homolog	-0.706853	0.00304826
RRP15	51018	ribosomal RNA processing 15 homolog	-0.832611	0.0258275
RRP9	9136	ribosomal RNA processing 9, U3 small nucleolar RNA binding protein	-0.678005	0.0103597
RRS1	23212	ribosome biogenesis regulator 1 homolog	-0.751013	0.00737733
RSPH3	83861	radial spoke head 3	0.640647	0.00647522
RUSC2	9853	RUN and SH3 domain containing 2	-0.35943	0.0478429
S100A4	6275	S100 calcium binding protein A4	0.997259	0.0202758
SAE1	10055	SUMO1 activating enzyme subunit 1	-0.363716	0.0274792
SAMD1	90378	sterile alpha motif domain containing 1	0.438824	0.0188683
SAMD14	201191	sterile alpha motif domain containing 14	1.29599	0.0139175
SAMD9	54809	sterile alpha motif domain containing 9	0.85456	0.0205472
SAMHD1	25939	SAM and HD domain containing deoxynucleoside triphosphate triphosphohydrolase 1	0.776334	0.00172075
SAP30	8819	Sin3A associated protein 30	1.00124	0.000115529
SARDH	1757	sarcosine dehydrogenase	1.0626	0.0286993
SARM1	23098	sterile alpha and TIR motif containing 1	0.520764	0.0328569
SAT1	6303	spermidine/spermine N1-acetyltransferase 1	-0.385106	0.0376958
SAT2	112483	spermidine/spermine N1-acetyltransferase family member 2	0.55198	0.00586169
SBDS	51119	SBDS ribosome maturation factor	-0.39076	0.0454235
SBDSP1	155370	SBDS pseudogene 1	-0.590323	0.0212804
SCAF4	57466	SR-related CTD associated factor 4	-0.403702	0.0281784
SCARA3	51435	scavenger receptor class A member 3	1.15086	5.18778e-05
SCARB1	949	scavenger receptor class B member 1	0.588596	0.0330518
SCARB2	950	scavenger receptor class B member 2	0.393942	0.00999269
SCD	6319	stearoyl-CoA desaturase	1.54858	0.000438818
SCML1	6322	Scm polycomb group protein like 1	-0.53446	0.0220133
SCN1B	6324	sodium voltage-gated channel beta subunit 1	0.831652	0.00733545
SCO2	9997	SCO cytochrome c oxidase assembly protein 2	-0.389073	0.0435454
SCPEP1	59342	serine carboxypeptidase 1	0.421723	0.0368703
SCRG1	11341	stimulator of chondrogenesis 1	-2.08345	0.00433605
SDAD1P1	157489	SDA1 domain containing 1 pseudogene 1	1.02543	0.00527053
SDE2	163859	SDE2 telomere maintenance homolog	-0.556679	0.0330426
SDK1	221935	sidekick cell adhesion molecule 1	2.20858	0.00651733
SEC23IP	11196	SEC23 interacting protein	-0.491788	0.034079
SEC61B	10952	SEC61 translocon beta subunit	-0.334428	0.039902
SEC62	7095	SEC62 homolog, preprotein translocation factor	-0.373922	0.0275054
SELENOS	55829	selenoprotein S	-0.329502	0.0278592
SELPLG	6404	selectin P ligand	-0.880611	0.0409883
SEMA4G	57715	semaphorin 4G	1.46259	0.0108747
SEMA6C	10500	semaphorin 6C	1.14803	0.00765864
SEPHS2	22928	selenophosphate synthetase 2	-0.421147	0.0457372
SEPTIN5	5413	septin 5	0.804969	0.0122528
SEPTIN6	23157	septin 6	0.621609	0.00983168
SERF1B	728492	small EDRK-rich factor 1B	-0.618312	0.036505
SERPINA3	12	serpin family A member 3	-1.01021	0.00135609
SERPINB1	1992	serpin family B member 1	0.516752	0.0093064
SERPINB2	5055	serpin family B member 2	-1.74948	0.000680402
SERPINB6	5269	serpin family B member 6	0.391035	0.0176312
SF3B1	23451	splicing factor 3b subunit 1	-0.507576	0.00217671
SF3B4	10262	splicing factor 3b subunit 4	-0.626657	0.00437766
SFPQ	6421	splicing factor proline and glutamine rich	-0.476671	0.0177949
SFRP1	6422	secreted frizzled related protein 1	0.825602	0.000751728
SGCE	8910	sarcoglycan epsilon	0.40521	0.0275179
SGTA	6449	small glutamine rich tetratricopeptide repeat containing alpha	-0.369093	0.0286909
SH2B2	10603	SH2B adaptor protein 2	0.917433	0.0468473
SH3BP5	9467	SH3 domain binding protein 5	0.620738	0.0220129
SH3BP5L	80851	SH3 binding domain protein 5 like	-0.800831	0.00137082
SH3D21	79729	SH3 domain containing 21	1.8473	0.000210081
SH3GL1	6455	SH3 domain containing GRB2 like 1, endophilin A2	-0.425438	0.00768052
SHANK3	85358	SH3 and multiple ankyrin repeat domains 3	0.819853	0.0265434
SHC2	25759	SHC adaptor protein 2	1.08066	0.0163079
SHH	6469	sonic hedgehog signaling molecule	-1.26844	0.026409
SHISA4	149345	shisa family member 4	0.476561	0.0372778
SIDT2	51092	SID1 transmembrane family member 2	0.429772	0.011814
SIPA1	6494	signal-induced proliferation-associated 1	0.907373	0.0141872
SIRT6	51548	sirtuin 6	-0.547265	0.0130643
SIX5	147912	SIX homeobox 5	0.422759	0.046644
SKAP2	8935	src kinase associated phosphoprotein 2	0.46599	0.0480247
SLC15A3	51296	solute carrier family 15 member 3	1.17531	0.0251578
SLC16A14	151473	solute carrier family 16 member 14	1.62554	0.0220968
SLC16A3	9123	solute carrier family 16 member 3	0.782463	0.000256707
SLC19A2	10560	solute carrier family 19 member 2	-0.441847	0.0438995
SLC1A5	6510	solute carrier family 1 member 5	-0.543173	0.0389815
SLC20A1	6574	solute carrier family 20 member 1	-0.706463	0.0115539
SLC20A2	6575	solute carrier family 20 member 2	-0.428166	0.0390427
SLC22A17	51310	solute carrier family 22 member 17	0.538209	0.024218
SLC22A18	5002	solute carrier family 22 member 18	0.623124	0.0322857
SLC25A1	6576	solute carrier family 25 member 1	0.599252	0.000382308
SLC25A19	60386	solute carrier family 25 member 19	-1.14391	0.00467794
SLC25A23	79085	solute carrier family 25 member 23	0.700696	0.00483975
SLC25A25	114789	solute carrier family 25 member 25	-0.813734	0.00346932
SLC25A32	81034	solute carrier family 25 member 32	-0.430518	0.0278533
SLC25A36	55186	solute carrier family 25 member 36	0.448353	0.0469868
SLC25A42	284439	solute carrier family 25 member 42	1.39833	0.00028069
SLC25A44	9673	solute carrier family 25 member 44	-0.626682	0.00563759
SLC27A4	10999	solute carrier family 27 member 4	-0.615365	0.0265626
SLC2A1	6513	solute carrier family 2 member 1	0.889846	0.00359276
SLC30A7	148867	solute carrier family 30 member 7	-0.486951	0.0242207
SLC35A1	10559	solute carrier family 35 member A1	0.403747	0.0420157
SLC35A2	7355	solute carrier family 35 member A2	-0.402598	0.0456718
SLC35B1	10237	solute carrier family 35 member B1	-0.398837	0.0253512
SLC36A1	206358	solute carrier family 36 member 1	-0.878617	0.000221035
SLC38A7	55238	solute carrier family 38 member 7	-0.37705	0.0218158
SLC39A4	55630	solute carrier family 39 member 4	0.772922	0.0204463
SLC39A7	7922	solute carrier family 39 member 7	-0.433269	0.0460576
SLC44A2	57153	solute carrier family 44 member 2	0.831835	0.00792295
SLC52A2	79581	solute carrier family 52 member 2	-0.607716	0.00173062
SLC66A3	130814	solute carrier family 66 member 3	0.544163	0.0236575
SLC6A8	6535	solute carrier family 6 member 8	0.436872	0.0322639
SLC7A1	6541	solute carrier family 7 member 1	-0.6005	0.000636806
SLC7A11	23657	solute carrier family 7 member 11	-0.720254	0.0130368
SLC7A5	8140	solute carrier family 7 member 5	-0.659555	0.00918622
SLX4IP	128710	SLX4 interacting protein	0.775134	0.0109264
SMAGP	57228	small cell adhesion glycoprotein	-0.523528	0.027512
SMARCA1	6594	SWI/SNF related, matrix associated, actin dependent regulator of chromatin, subfamily a, member 1	0.410925	0.0343346
SMARCA2	6595	SWI/SNF related, matrix associated, actin dependent regulator of chromatin, subfamily a, member 2	-0.374768	0.0400409
SMG5	23381	SMG5 nonsense mediated mRNA decay factor	-0.368571	0.0303219
SMG6	23293	SMG6 nonsense mediated mRNA decay factor	-0.552246	0.00482014
SMIM10L2A	399668	small integral membrane protein 10 like 2A	2.27671	0.000843049
SMIM20	389203	small integral membrane protein 20	0.44999	0.0447045
SMIM3	85027	small integral membrane protein 3	0.525891	0.00840172
SMN1	6606	survival of motor neuron 1, telomeric	-0.425312	0.0348555
SMPD4	55627	sphingomyelin phosphodiesterase 4	-0.383682	0.0423327
SMURF2	64750	SMAD specific E3 ubiquitin protein ligase 2	-0.7367	9.92073e-05
SNAPC3	6619	small nuclear RNA activating complex polypeptide 3	0.518543	0.00748494
SNCA	6622	synuclein alpha	1.09778	0.0125742
SNED1	25992	sushi, nidogen and EGF like domains 1	0.538563	0.0295075
SNHG17	388796	small nucleolar RNA host gene 17	-0.744278	0.035399
SNIP1	79753	Smad nuclear interacting protein 1	-0.586589	0.0230889
SNRK	54861	SNF related kinase	-0.514399	0.0110205
SNRPB	6628	small nuclear ribonucleoprotein polypeptides B and B1	-0.534973	0.011121
SNTA1	6640	syntrophin alpha 1	0.603638	0.00617429
SNX11	29916	sorting nexin 11	-0.567891	0.0248363
SNX33	257364	sorting nexin 33	0.442568	0.0171284
SOCS4	122809	suppressor of cytokine signaling 4	-0.355369	0.0350422
SOX12	6666	SRY-box transcription factor 12	0.645247	0.00130794
SOX17	64321	SRY-box transcription factor 17	-0.522274	0.00914471
SP100	6672	SP100 nuclear antigen	0.374848	0.0135044
SPAG4	6676	sperm associated antigen 4	2.1949	2.037e-06
SPARC	6678	secreted protein acidic and cysteine rich	-0.652893	0.0441048
SPATA2	9825	spermatogenesis associated 2	-0.696319	0.0125246
SPATA2L	124044	spermatogenesis associated 2 like	-0.50753	0.0326013
SPATA7	55812	spermatogenesis associated 7	0.856393	0.00489123
SPATC1L	84221	spermatogenesis and centriole associated 1 like	0.602932	0.0442828
SPNS1	83985	sphingolipid transporter 1 (putative)	-0.316637	0.0191997
SPON2	10417	spondin 2	0.624364	0.0015459
SPP1	6696	secreted phosphoprotein 1	-1.02461	0.0448303
SPRED3	399473	sprouty related EVH1 domain containing 3	0.568246	0.0394481
SPRTN	83932	SprT-like N-terminal domain	-0.532556	0.016419
SPRY1	10252	sprouty RTK signaling antagonist 1	1.01244	0.0319353
SPRY2	10253	sprouty RTK signaling antagonist 2	-0.653658	0.00159235
SPRY4	81848	sprouty RTK signaling antagonist 4	-0.726224	0.0185292
SPSB1	80176	splA/ryanodine receptor domain and SOCS box containing 1	-0.544066	0.0163817
SPTBN2	6712	spectrin beta, non-erythrocytic 2	1.81786	0.0375425
SPTY2D1	144108	SPT2 chromatin protein domain containing 1	-0.570854	0.0153054
SRA1	10011	steroid receptor RNA activator 1	-0.54643	0.0439056
SRC	6714	SRC proto-oncogene, non-receptor tyrosine kinase	-0.368987	0.0297283
SRD5A1	6715	steroid 5 alpha-reductase 1	0.596603	0.0195651
SRD5A3	79644	steroid 5 alpha-reductase 3	1.25675	8.41247e-07
SREBF2	6721	sterol regulatory element binding transcription factor 2	0.546581	0.00170579
SRGAP3	9901	SLIT-ROBO Rho GTPase activating protein 3	1.7079	0.026784
SRM	6723	spermidine synthase	-0.562015	0.0160955
SRP19	6728	signal recognition particle 19	-0.632223	0.000828189
SRPRA	6734	SRP receptor subunit alpha	-0.365725	0.0196592
SRPRB	58477	SRP receptor subunit beta	-0.517875	0.0400338
SRPX	8406	sushi repeat containing protein X-linked	0.556771	0.00141018
SRPX2	27286	sushi repeat containing protein X-linked 2	0.65752	0.00110402
SRRM1	10250	serine and arginine repetitive matrix 1	-0.617141	0.0148164
SRRM3	222183	serine/arginine repetitive matrix 3	2.03627	0.00191354
SRRT	51593	serrate, RNA effector molecule	-0.97133	0.00109027
SRSF1	6426	serine and arginine rich splicing factor 1	-0.417563	0.0498559
SRSF2	6427	serine and arginine rich splicing factor 2	-0.582607	0.0210163
SRSF3	6428	serine and arginine rich splicing factor 3	-0.50752	0.0247901
SSNA1	8636	SS nuclear autoantigen 1	-0.775263	0.000166613
SSPN	8082	sarcospan	1.39613	9.97754e-06
SSX2IP	117178	SSX family member 2 interacting protein	0.597369	0.0175348
ST6GALNAC6	30815	ST6 N-acetylgalactosaminide alpha-2,6-sialyltransferase 6	0.350459	0.0265364
ST7	7982	suppression of tumorigenicity 7	-0.371698	0.0434473
ST8SIA4	7903	ST8 alpha-N-acetyl-neuraminide alpha-2,8-sialyltransferase 4	1.98295	0.0187023
STAP2	55620	signal transducing adaptor family member 2	1.07527	0.045388
STARD10	10809	StAR related lipid transfer domain containing 10	0.52595	0.0315513
STARD4	134429	StAR related lipid transfer domain containing 4	0.696728	0.00617332
STARD7	56910	StAR related lipid transfer domain containing 7	-0.61865	0.000738335
STEAP2	261729	STEAP2 metalloreductase	0.879422	0.0204753
STEAP3	55240	STEAP3 metalloreductase	0.693573	0.00360231
STIP1	10963	stress induced phosphoprotein 1	-0.436719	0.0391513
STK10	6793	serine/threonine kinase 10	-0.678138	0.0112562
STK40	83931	serine/threonine kinase 40	-0.848743	0.000540195
STON1	11037	stonin 1	1.07015	0.00348237
STRAP	11171	serine/threonine kinase receptor associated protein	-0.404264	0.0101666
STX17	55014	syntaxin 17	0.797664	0.00187753
STX2	2054	syntaxin 2	-0.362772	0.04154
SUCLG2	8801	succinate-CoA ligase GDP-forming beta subunit	0.583519	0.0204365
SULT1C2	6819	sulfotransferase family 1C member 2	2.87378	0.00145237
SURF4	6836	surfeit 4	-0.340081	0.0326192
SUSD1	64420	sushi domain containing 1	0.458365	0.0158405
SUSD6	9766	sushi domain containing 6	-0.383292	0.030225
SWAP70	23075	switching B cell complex subunit SWAP70	-0.448928	0.0163883
SYNGR1	9145	synaptogyrin 1	0.702118	0.0405985
SYNGR3	9143	synaptogyrin 3	0.851376	0.0352588
SYNJ2BP	55333	synaptojanin 2 binding protein	0.505888	0.0223416
SYNPO	11346	synaptopodin	1.36967	0.00162202
SYTL2	54843	synaptotagmin like 2	1.58723	0.00780655
TACC2	10579	transforming acidic coiled-coil containing protein 2	-0.776547	0.00236409
TADA3	10474	transcriptional adaptor 3	0.396338	0.0113437
TAF13	6884	TATA-box binding protein associated factor 13	-0.707394	0.00383697
TAF8	129685	TATA-box binding protein associated factor 8	-0.599214	0.0148015
TAFA5	25817	TAFA chemokine like family member 5	-0.867813	0.0346547
TAGLN	6876	transgelin	-1.23046	0.000346632
TALDO1	6888	transaldolase 1	-0.348034	0.0311795
TANGO2	128989	transport and golgi organization 2 homolog	-0.527164	0.0155843
TAPBP	6892	TAP binding protein	0.627933	0.000204989
TATDN2	9797	TatD DNase domain containing 2	-0.470478	0.0217716
TBC1D20	128637	TBC1 domain family member 20	-0.330495	0.0206036
TBCD	6904	tubulin folding cofactor D	0.483394	0.024
TBRG4	9238	transforming growth factor beta regulator 4	-0.4818	0.0166608
TBX3	6926	T-box transcription factor 3	-0.33012	0.0441825
TBXA2R	6915	thromboxane A2 receptor	1.023	0.0266806
TC2N	123036	tandem C2 domains, nuclear	1.36216	0.0275358
TCAF2	285966	TRPM8 channel associated factor 2	1.7193	3.88695e-05
TCAIM	285343	T cell activation inhibitor, mitochondrial	0.690914	0.0100405
TCEA3	6920	transcription elongation factor A3	1.14618	0.00957576
TCEAL7	56849	transcription elongation factor A like 7	0.96553	0.0217878
TCF20	6942	transcription factor 20	-0.486222	0.0475644
TCTN2	79867	tectonic family member 2	0.645485	0.00229387
TDG	6996	thymine DNA glycosylase	-0.740888	0.00119417
TDP1	55775	tyrosyl-DNA phosphodiesterase 1	-0.661109	0.00673262
TEAD3	7005	TEA domain transcription factor 3	-0.394679	0.0254003
TENT5A	55603	terminal nucleotidyltransferase 5A	0.757435	0.00205065
TET2	54790	tet methylcytosine dioxygenase 2	0.490649	0.0472072
TET3	200424	tet methylcytosine dioxygenase 3	-0.65689	0.00941534
TEX261	113419	testis expressed 261	-0.433929	0.0125563
TFAM	7019	transcription factor A, mitochondrial	-0.505476	0.0400713
TFB1M	51106	transcription factor B1, mitochondrial	0.505174	0.0464522
TFE3	7030	transcription factor binding to IGHM enhancer 3	-0.376902	0.040368
TFRC	7037	transferrin receptor	-0.632211	0.0147629
TGFB1	7040	transforming growth factor beta 1	0.427339	0.0159307
TGFBRAP1	9392	transforming growth factor beta receptor associated protein 1	-0.527459	0.0123071
TGM2	7052	transglutaminase 2	0.54047	0.0467712
TGS1	96764	trimethylguanosine synthase 1	-0.542878	0.0486285
THBS3	7059	thrombospondin 3	-0.405827	0.0402567
THEMIS2	9473	thymocyte selection associated family member 2	1.13059	0.0118264
THNSL1	79896	threonine synthase like 1	0.87244	0.0379029
THSD1	55901	thrombospondin type 1 domain containing 1	-0.939877	0.0277831
THYN1	29087	thymocyte nuclear protein 1	0.457566	0.0333846
TIGAR	57103	TP53 induced glycolysis regulatory phosphatase	-0.656223	0.0190667
TIMM17A	10440	translocase of inner mitochondrial membrane 17A	-0.395752	0.0443878
TIMM22	29928	translocase of inner mitochondrial membrane 22	-0.536016	0.0286179
TIMM23B	100652748	translocase of inner mitochondrial membrane 23 homolog B	-0.685958	0.0390835
TIMM44	10469	translocase of inner mitochondrial membrane 44	-0.439898	0.0227524
TIMM50	92609	translocase of inner mitochondrial membrane 50	-0.433638	0.0367978
TIMP3	7078	TIMP metallopeptidase inhibitor 3	-0.90747	0.0381903
TJP1	7082	tight junction protein 1	-0.513141	0.0101912
TM7SF2	7108	transmembrane 7 superfamily member 2	1.26243	0.0186007
TM7SF3	51768	transmembrane 7 superfamily member 3	0.610344	0.00382705
TMA16	55319	translation machinery associated 16 homolog	-0.525628	0.0475289
TMED1	11018	transmembrane p24 trafficking protein 1	0.526677	0.00596527
TMEM104	54868	transmembrane protein 104	-0.675749	0.000743728
TMEM106C	79022	transmembrane protein 106C	0.750082	0.00778958
TMEM107	84314	transmembrane protein 107	0.84156	0.0384431
TMEM109	79073	transmembrane protein 109	-0.627099	0.000560541
TMEM119	338773	transmembrane protein 119	0.730827	0.0384879
TMEM123	114908	transmembrane protein 123	0.390572	0.0340567
TMEM134	80194	transmembrane protein 134	0.677337	0.0111816
TMEM138	51524	transmembrane protein 138	-0.719339	0.015849
TMEM140	55281	transmembrane protein 140	0.995	0.0232618
TMEM14A	28978	transmembrane protein 14A	0.806085	0.00215871
TMEM161B-AS1	100505894	TMEM161B antisense RNA 1	1.23334	0.0116913
TMEM201	199953	transmembrane protein 201	-0.749631	0.00257252
TMEM205	374882	transmembrane protein 205	0.35399	0.0494036
TMEM208	29100	transmembrane protein 208	-0.427171	0.026934
TMEM219	124446	transmembrane protein 219	0.358844	0.0132173
TMEM222	84065	transmembrane protein 222	-0.347398	0.0253192
TMEM231	79583	transmembrane protein 231	0.488893	0.0369451
TMEM254	80195	transmembrane protein 254	0.515435	0.0178213
TMEM256	254863	transmembrane protein 256	0.67165	0.0065535
TMEM35A	59353	transmembrane protein 35A	1.10864	0.0372706
TMEM42	131616	transmembrane protein 42	0.644718	0.0182858
TMEM45A	55076	transmembrane protein 45A	0.972689	0.000269846
TMEM47	83604	transmembrane protein 47	0.556773	0.00173091
TMEM51	55092	transmembrane protein 51	-0.771702	0.0238946
TMEM54	113452	transmembrane protein 54	0.588328	0.0027079
TMEM8B	51754	transmembrane protein 8B	0.600221	0.0258575
TMEM9	252839	transmembrane protein 9	0.536784	0.00218565
TMEM97	27346	transmembrane protein 97	1.03694	0.0256665
TMTC2	160335	transmembrane O-mannosyltransferase targeting cadherins 2	0.962749	0.0156248
TNFAIP8L3	388121	TNF alpha induced protein 8 like 3	0.498288	0.0461851
TNFRSF14	8764	TNF receptor superfamily member 14	1.56771	0.000165011
TNFRSF19	55504	TNF receptor superfamily member 19	0.750373	0.0315122
TNFSF12	8742	TNF superfamily member 12	0.905306	0.000178831
TNFSF9	8744	TNF superfamily member 9	-1.57644	7.53068e-05
TNNT1	7138	troponin T1, slow skeletal type	0.982554	0.0149311
TNS1	7145	tensin 1	0.592515	0.00392636
TNS3	64759	tensin 3	0.711978	0.00502512
TOMM40	10452	translocase of outer mitochondrial membrane 40	-0.514663	0.00761373
TOP1	7150	DNA topoisomerase I	-0.434008	0.01599
TOP3A	7156	DNA topoisomerase III alpha	-0.583969	0.0136374
TOR1B	27348	torsin family 1 member B	-0.351296	0.0380161
TOR3A	64222	torsin family 3 member A	-0.579439	0.0244539
TOX	9760	thymocyte selection associated high mobility group box	1.43278	0.0382825
TP53RK	112858	TP53 regulating kinase	-0.794121	0.00113258
TP53TG1	11257	TP53 target 1	0.721027	0.0224431
TPBG	7162	trophoblast glycoprotein	0.514989	0.00281293
TPI1	7167	triosephosphate isomerase 1	0.898096	9.60828e-05
TPP1	1200	tripeptidyl peptidase 1	0.584746	0.00471116
TRADD	8717	TNFRSF1A associated via death domain	0.582244	0.00115965
TRAF4	9618	TNF receptor associated factor 4	-0.730198	0.0207291
TRAPPC10	7109	trafficking protein particle complex 10	-0.602986	0.0269562
TRAPPC11	60684	trafficking protein particle complex 11	0.440458	0.0305866
TRAPPC8	22878	trafficking protein particle complex 8	-0.303241	0.042159
TREM1	54210	triggering receptor expressed on myeloid cells 1	1.52574	0.0136705
TRIB1	10221	tribbles pseudokinase 1	-0.551099	0.0128861
TRIM14	9830	tripartite motif containing 14	1.08245	0.0303657
TRIM22	10346	tripartite motif containing 22	0.515926	0.0371059
TRIM26	7726	tripartite motif containing 26	-0.694567	0.00280676
TRIM27	5987	tripartite motif containing 27	-0.424008	0.00912748
TRIM34	53840	tripartite motif containing 34	0.692391	0.0458651
TRIM35	23087	tripartite motif containing 35	-0.60258	0.0192017
TRIM5	85363	tripartite motif containing 5	0.530159	0.0287585
TRIM52	84851	tripartite motif containing 52	-0.734192	0.0379708
TRIM69	140691	tripartite motif containing 69	1.19075	0.00030629
TRIQK	286144	triple QxxK/R motif containing	0.607111	0.0471444
TRMT10C	54931	tRNA methyltransferase 10C, mitochondrial RNase P subunit	-0.571698	0.0316088
TRMT61A	115708	tRNA methyltransferase 61A	-0.638403	0.00711882
TRNAU1AP	54952	tRNA selenocysteine 1 associated protein 1	0.850934	0.000482947
TSPY26P	128854	testis specific protein Y-linked 26, pseudogene	1.23078	0.00560389
TSSC4	10078	tumor suppressing subtransferable candidate 4	-0.520935	0.0204587
TSTA3	7264	tissue specific transplantation antigen P35B	-0.887394	0.000119499
TTC14	151613	tetratricopeptide repeat domain 14	-0.569908	0.0204281
TTC3	7267	tetratricopeptide repeat domain 3	0.360319	0.0297115
TTC30A	92104	tetratricopeptide repeat domain 30A	0.777105	0.0155282
TTN-AS1	100506866	TTN antisense RNA 1	0.802774	0.0210436
TUBA1B	10376	tubulin alpha 1b	-0.712037	0.0273338
TUBA1C	84790	tubulin alpha 1c	-0.452356	0.039896
TUBB2A	7280	tubulin beta 2A class IIa	-0.947661	0.000656584
TUBB4B	10383	tubulin beta 4B class IVb	-0.719337	0.0143683
TUBB6	84617	tubulin beta 6 class V	-0.429548	0.0420111
TUBGCP2	10844	tubulin gamma complex associated protein 2	0.524441	0.0184272
TWISTNB	221830	TWIST neighbor	-0.522867	0.0226013
TWNK	56652	twinkle mtDNA helicase	-0.847367	0.00833844
TWSG1	57045	twisted gastrulation BMP signaling modulator 1	0.456846	0.0068835
TXLNG	55787	taxilin gamma	-0.571576	0.026345
TXNDC9	10190	thioredoxin domain containing 9	-0.524608	0.0134315
TXNRD1	7296	thioredoxin reductase 1	-0.727352	0.0135689
TYMP	1890	thymidine phosphorylase	0.552948	0.0103143
UBALD1	124402	UBA like domain containing 1	-0.511162	0.0132939
UBALD2	283991	UBA like domain containing 2	-0.478177	0.0238802
UBAP2	55833	ubiquitin associated protein 2	-0.459793	0.00819473
UBE2D1	7321	ubiquitin conjugating enzyme E2 D1	-0.44456	0.0453152
UBE2E2	7325	ubiquitin conjugating enzyme E2 E2	-0.457795	0.035223
UBE2G2	7327	ubiquitin conjugating enzyme E2 G2	-0.494182	0.0365633
UBE2J2	118424	ubiquitin conjugating enzyme E2 J2	-0.42645	0.021344
UBE2L6	9246	ubiquitin conjugating enzyme E2 L6	0.624912	0.0103687
UBE2M	9040	ubiquitin conjugating enzyme E2 M	-0.423483	0.00920079
UBN1	29855	ubinuclein 1	-0.336562	0.0319307
UBR3	130507	ubiquitin protein ligase E3 component n-recognin 3	-0.423832	0.0319262
UBTF	7343	upstream binding transcription factor	0.4728	0.010507
UCK2	7371	uridine-cytidine kinase 2	-0.80213	0.00499161
UFD1	7353	ubiquitin recognition factor in ER associated degradation 1	-0.510475	0.0123799
UGDH	7358	UDP-glucose 6-dehydrogenase	-0.684321	0.0108366
UGP2	7360	UDP-glucose pyrophosphorylase 2	0.426204	0.040986
UMPS	7372	uridine monophosphate synthetase	-0.541261	0.0239835
UNC5C	8633	unc-5 netrin receptor C	0.857221	0.040638
UNKL	64718	unk like zinc finger	-0.551301	0.0163675
UQCC1	55245	ubiquinol-cytochrome c reductase complex assembly factor 1	-0.406238	0.029636
URB2	9816	URB2 ribosome biogenesis homolog	-0.793654	0.0152898
URGCP	55665	upregulator of cell proliferation	-0.40364	0.0401422
USP10	9100	ubiquitin specific peptidase 10	-0.326415	0.042077
USP12	219333	ubiquitin specific peptidase 12	-0.421212	0.0452865
USP18	11274	ubiquitin specific peptidase 18	1.70349	0.0101482
USP42	84132	ubiquitin specific peptidase 42	-0.602289	0.00379756
UTP11	51118	UTP11 small subunit processome component	-0.670505	0.00459086
VAMP5	10791	vesicle associated membrane protein 5	0.654779	0.00360251
VARS1	7407	valyl-tRNA synthetase 1	-0.50673	0.0160737
VAT1L	57687	vesicle amine transport 1 like	0.781072	0.00620171
VCP	7415	valosin containing protein	-0.393528	0.0251626
VDAC1	7416	voltage dependent anion channel 1	0.300081	0.0284851
VEGFA	7422	vascular endothelial growth factor A	1.04575	1.21394e-05
VEGFB	7423	vascular endothelial growth factor B	0.597077	0.00479918
VEPH1	79674	ventricular zone expressed PH domain containing 1	-0.933489	0.00247894
VIM	7431	vimentin	0.468527	0.0205197
VKORC1	79001	vitamin K epoxide reductase complex subunit 1	0.291046	0.0408647
VMAC	400673	vimentin type intermediate filament associated coiled-coil protein	0.988669	0.0371008
VPS33A	65082	VPS33A core subunit of CORVET and HOPS complexes	0.491115	0.0137791
VPS37D	155382	VPS37D subunit of ESCRT-I	1.11235	0.0144859
VPS54	51542	VPS54 subunit of GARP complex	-0.370366	0.0409856
VSIR	64115	V-set immunoregulatory receptor	0.948066	0.0418058
VWA1	64856	von Willebrand factor A domain containing 1	1.07176	0.0014071
VWA5A	4013	von Willebrand factor A domain containing 5A	0.770324	0.047284
WARS1	7453	tryptophanyl-tRNA synthetase 1	-0.567842	0.0266871
WBP1	23559	WW domain binding protein 1	0.359753	0.0197166
WDR18	57418	WD repeat domain 18	-0.71167	0.00366002
WDR20	91833	WD repeat domain 20	-0.463966	0.0297391
WDR26	80232	WD repeat domain 26	-0.377343	0.0195793
WDR31	114987	WD repeat domain 31	0.828121	0.0184575
WDR37	22884	WD repeat domain 37	-0.571028	0.00230092
WDR43	23160	WD repeat domain 43	-0.591514	0.0100171
WDR46	9277	WD repeat domain 46	-0.566736	0.00544845
WDR54	84058	WD repeat domain 54	0.504006	0.0417312
WDR74	54663	WD repeat domain 74	-0.663768	0.0058565
WDR77	79084	WD repeat domain 77	-0.760006	0.0135492
WIPI2	26100	WD repeat domain, phosphoinositide interacting 2	-0.398268	0.0136954
WT1	7490	WT1 transcription factor	-0.902266	0.043146
XAF1	54739	XIAP associated factor 1	0.888041	0.00629702
XPNPEP2	7512	X-prolyl aminopeptidase 2	-1.22975	0.0441669
XYLT1	64131	xylosyltransferase 1	-0.463015	0.0202953
XYLT2	64132	xylosyltransferase 2	0.456932	0.011556
YEATS2	55689	YEATS domain containing 2	0.988411	3.24396e-06
YJEFN3	374887	YjeF N-terminal domain containing 3	-1.53441	0.033119
YKT6	10652	YKT6 v-SNARE homolog	-0.620909	0.000820926
YPEL4	219539	yippee like 4	1.07727	0.0493805
YRDC	79693	yrdC N6-threonylcarbamoyltransferase domain containing	-0.646357	0.00737803
YTHDF1	54915	YTH N6-methyladenosine RNA binding protein 1	-0.603609	0.000289472
YTHDF2	51441	YTH N6-methyladenosine RNA binding protein 2	-0.393013	0.02411
ZBED5-AS1	729013	ZBED5 antisense RNA 1	0.842216	0.0328423
ZBED8	63920	zinc finger BED-type containing 8	1.18503	0.00993511
ZBED9	114821	zinc finger BED-type containing 9	1.61524	0.027695
ZBTB4	57659	zinc finger and BTB domain containing 4	0.422256	0.00800984
ZBTB43	23099	zinc finger and BTB domain containing 43	-1.03029	0.00260955
ZBTB5	9925	zinc finger and BTB domain containing 5	-0.571018	0.0163581
ZC3H18	124245	zinc finger CCCH-type containing 18	-0.485443	0.013104
ZC3H6	376940	zinc finger CCCH-type containing 6	0.671693	0.046252
ZC3HAV1L	92092	zinc finger CCCH-type containing, antiviral 1 like	1.41038	0.00381379
ZCCHC14	23174	zinc finger CCHC-type containing 14	-0.396053	0.0340924
ZDHHC12	84885	zinc finger DHHC-type containing 12	0.445636	0.0324481
ZDHHC14	79683	zinc finger DHHC-type containing 14	-0.808378	0.026024
ZDHHC2	51201	zinc finger DHHC-type palmitoyltransferase 2	0.445521	0.012386
ZFAND2A	90637	zinc finger AN1-type containing 2A	-0.946029	0.00732054
ZFAS1	441951	ZNFX1 antisense RNA 1	-0.521917	0.0150886
ZFP1	162239	ZFP1 zinc finger protein	0.783984	0.0274878
ZGPAT	84619	zinc finger CCCH-type and G-patch domain containing	-0.600964	0.0429036
ZIK1	284307	zinc finger protein interacting with K protein 1	-0.887066	0.0159736
ZMYM3	9203	zinc finger MYM-type containing 3	0.537001	0.0304635
ZMYND19	116225	zinc finger MYND-type containing 19	-0.589917	0.00788076
ZNF121	7675	zinc finger protein 121	-0.637371	0.0318226
ZNF214	7761	zinc finger protein 214	1.15311	0.034184
ZNF221	7638	zinc finger protein 221	1.53015	0.0495601
ZNF277	11179	zinc finger protein 277	0.630841	0.0276873
ZNF32	7580	zinc finger protein 32	0.422859	0.0215707
ZNF347	84671	zinc finger protein 347	-1.06553	0.0244166
ZNF358	140467	zinc finger protein 358	0.490103	0.00855973
ZNF385A	25946	zinc finger protein 385A	1.29062	0.00177273
ZNF395	55893	zinc finger protein 395	1.74783	3.15686e-07
ZNF470	388566	zinc finger protein 470	0.670029	0.026405
ZNF503	84858	zinc finger protein 503	0.676244	0.0483218
ZNF550	162972	zinc finger protein 550	-0.606766	0.0309901
ZNF574	64763	zinc finger protein 574	-0.498202	0.0460901
ZNF581	51545	zinc finger protein 581	0.589203	0.0333463
ZNF589	51385	zinc finger protein 589	0.764719	0.0405855
ZNF598	90850	zinc finger protein 598	-0.441759	0.0155943
ZNF626	199777	zinc finger protein 626	0.726109	0.0141526
ZNF628	89887	zinc finger protein 628	-0.727937	0.0170368
ZNF655	79027	zinc finger protein 655	-0.412782	0.0144158
ZNF668	79759	zinc finger protein 668	-0.688861	0.00637113
ZNF669	79862	zinc finger protein 669	-0.693584	0.0444666
ZNF691	51058	zinc finger protein 691	0.559987	0.040442
ZNF703	80139	zinc finger protein 703	-0.855241	0.000448486
ZNF746	155061	zinc finger protein 746	-0.680526	0.00243448
ZNF75A	7627	zinc finger protein 75a	-0.567038	0.0404595
ZNF766	90321	zinc finger protein 766	0.848479	0.00543562
ZNF777	27153	zinc finger protein 777	-0.372552	0.0472132
ZNF827	152485	zinc finger protein 827	0.618895	0.0437242
ZNF83	55769	zinc finger protein 83	0.451331	0.0249345
ZNF846	162993	zinc finger protein 846	0.944044	0.00327414
ZNF883	169834	zinc finger protein 883	1.20602	0.0324994
ZNF92	168374	zinc finger protein 92	-0.964275	0.0308036
ZSWIM5	57643	zinc finger SWIM-type containing 5	0.721317	0.0477861
ZSWIM6	57688	zinc finger SWIM-type containing 6	-0.447122	0.0352559
