# Supplementary material for: An organ-on-chip model of pulmonary arterial hypertension identifies a BMPR2-SOX17-prostacyclin signalling axis
Source: Commun Biol. 2022 Nov 7;5:1192. doi: 10.1038/s42003-022-04169-z (PMC9640600; doi:10.1038/s42003-022-04169-z)
Supplement: Supplementary file 8 — Supplementary Data 5 [file 42003_2022_4169_MOESM8_ESM.xlsx]

## Sheet: HALLMARK
NAME	GS<br> follow link to MSigDB	GS DETAILS	SIZE	ES	NES	NOM p-val	FDR q-val	FWER p-val	RANK AT MAX	LEADING EDGE
HALLMARK_HYPOXIA	HALLMARK_HYPOXIA	Details ...	32	0.438804	2.88948	0	0	0	308	tags=91%, list=49%, signal=168%
HALLMARK_GLYCOLYSIS	HALLMARK_GLYCOLYSIS	Details ...	18	0.456045	2.27047	0	0.0041417	0.008	70	tags=56%, list=11%, signal=61%
HALLMARK_CHOLESTEROL_HOMEOSTASIS	HALLMARK_CHOLESTEROL_HOMEOSTASIS	Details ...	7	0.650641	2.16321	0.00199601	0.00696768	0.022	224	tags=100%, list=35%, signal=153%
HALLMARK_G2M_CHECKPOINT	HALLMARK_G2M_CHECKPOINT	Details ...	16	-0.419715	-1.99992	0.00204082	0.0244988	0.07	295	tags=88%, list=47%, signal=160%
HALLMARK_UNFOLDED_PROTEIN_RESPONSE	HALLMARK_UNFOLDED_PROTEIN_RESPONSE	Details ...	9	-0.586281	-2.11599	0.00212766	0.0365357	0.033	57	tags=67%, list=9%, signal=72%
HALLMARK_MYC_TARGETS_V1	HALLMARK_MYC_TARGETS_V1	Details ...	10	-0.52818	-2.0743	0.00585938	0.0256715	0.048	304	tags=100%, list=48%, signal=190%
HALLMARK_E2F_TARGETS	HALLMARK_E2F_TARGETS	Details ...	9	-0.541801	-1.97882	0.00996016	0.0218284	0.082	295	tags=100%, list=47%, signal=185%
HALLMARK_ADIPOGENESIS	HALLMARK_ADIPOGENESIS	Details ...	13	0.42706	1.86797	0.0189873	0.0379675	0.149	269	tags=85%, list=43%, signal=144%
HALLMARK_TNFA_SIGNALING_VIA_NFKB	HALLMARK_TNFA_SIGNALING_VIA_NFKB	Details ...	15	-0.330736	-1.50294	0.0476191	0.217577	0.71	260	tags=73%, list=41%, signal=122%
HALLMARK_UV_RESPONSE_DN	HALLMARK_UV_RESPONSE_DN	Details ...	9	-0.439979	-1.57736	0.0555556	0.18374	0.566	148	tags=67%, list=23%, signal=86%
HALLMARK_BILE_ACID_METABOLISM	HALLMARK_BILE_ACID_METABOLISM	Details ...	5	0.517572	1.46021	0.09	0.282049	0.793	306	tags=100%, list=48%, signal=193%
HALLMARK_DNA_REPAIR	HALLMARK_DNA_REPAIR	Details ...	6	-0.463733	-1.39256	0.112205	0.304321	0.875	237	tags=83%, list=38%, signal=132%
HALLMARK_MYC_TARGETS_V2	HALLMARK_MYC_TARGETS_V2	Details ...	8	-0.38423	-1.3447	0.161491	0.323398	0.923	156	tags=63%, list=25%, signal=82%
HALLMARK_KRAS_SIGNALING_UP	HALLMARK_KRAS_SIGNALING_UP	Details ...	12	-0.294157	-1.22646	0.189293	0.40032	0.982	187	tags=58%, list=30%, signal=81%
HALLMARK_UV_RESPONSE_UP	HALLMARK_UV_RESPONSE_UP	Details ...	15	-0.2671	-1.25966	0.201207	0.396617	0.974	173	tags=53%, list=27%, signal=72%
HALLMARK_FATTY_ACID_METABOLISM	HALLMARK_FATTY_ACID_METABOLISM	Details ...	5	0.448243	1.23883	0.209503	0.583173	0.98	97	tags=60%, list=15%, signal=70%
HALLMARK_ANDROGEN_RESPONSE	HALLMARK_ANDROGEN_RESPONSE	Details ...	8	0.34691	1.22144	0.218876	0.531589	0.987	335	tags=88%, list=53%, signal=184%
HALLMARK_ALLOGRAFT_REJECTION	HALLMARK_ALLOGRAFT_REJECTION	Details ...	6	0.394667	1.21346	0.234818	0.478107	0.988	173	tags=67%, list=27%, signal=91%
HALLMARK_COMPLEMENT	HALLMARK_COMPLEMENT	Details ...	6	-0.396267	-1.19556	0.236581	0.404834	0.987	174	tags=67%, list=28%, signal=91%
HALLMARK_HEME_METABOLISM	HALLMARK_HEME_METABOLISM	Details ...	15	0.247727	1.15967	0.254941	0.510437	0.994	225	tags=60%, list=36%, signal=91%
HALLMARK_KRAS_SIGNALING_DN	HALLMARK_KRAS_SIGNALING_DN	Details ...	6	-0.3816	-1.16496	0.264646	0.415677	0.993	78	tags=50%, list=12%, signal=57%
HALLMARK_IL2_STAT5_SIGNALING	HALLMARK_IL2_STAT5_SIGNALING	Details ...	13	0.259273	1.10386	0.319527	0.551437	0.997	130	tags=46%, list=21%, signal=57%
HALLMARK_MTORC1_SIGNALING	HALLMARK_MTORC1_SIGNALING	Details ...	23	-0.182637	-1.05608	0.361616	0.548418	1	82	tags=30%, list=13%, signal=34%
HALLMARK_COAGULATION	HALLMARK_COAGULATION	Details ...	6	-0.3232	-0.98024	0.456	0.634782	1	430	tags=100%, list=68%, signal=311%
HALLMARK_EPITHELIAL_MESENCHYMAL_TRANSITION	HALLMARK_EPITHELIAL_MESENCHYMAL_TRANSITION	Details ...	15	-0.213203	-0.979517	0.473297	0.594016	1	80	tags=33%, list=13%, signal=37%
HALLMARK_ESTROGEN_RESPONSE_LATE	HALLMARK_ESTROGEN_RESPONSE_LATE	Details ...	10	0.255717	0.964706	0.507905	0.754415	1	345	tags=80%, list=55%, signal=174%
HALLMARK_INTERFERON_GAMMA_RESPONSE	HALLMARK_INTERFERON_GAMMA_RESPONSE	Details ...	10	0.242995	0.930077	0.531872	0.757369	1	416	tags=90%, list=66%, signal=260%
HALLMARK_INFLAMMATORY_RESPONSE	HALLMARK_INFLAMMATORY_RESPONSE	Details ...	12	-0.209208	-0.880329	0.596457	0.710702	1	187	tags=50%, list=30%, signal=70%
HALLMARK_INTERFERON_ALPHA_RESPONSE	HALLMARK_INTERFERON_ALPHA_RESPONSE	Details ...	7	0.275183	0.879699	0.600746	0.789792	1	278	tags=71%, list=44%, signal=126%
HALLMARK_ESTROGEN_RESPONSE_EARLY	HALLMARK_ESTROGEN_RESPONSE_EARLY	Details ...	13	0.19405	0.837252	0.636538	0.805986	1	413	tags=85%, list=65%, signal=240%
HALLMARK_OXIDATIVE_PHOSPHORYLATION	HALLMARK_OXIDATIVE_PHOSPHORYLATION	Details ...	10	-0.182931	-0.706328	0.828512	0.932046	1	266	tags=60%, list=42%, signal=102%
HALLMARK_PROTEIN_SECRETION	HALLMARK_PROTEIN_SECRETION	Details ...	5	-0.234185	-0.660288	0.88632	0.937023	1	233	tags=60%, list=37%, signal=94%
HALLMARK_MYOGENESIS	HALLMARK_MYOGENESIS	Details ...	10	0.167955	0.645298	0.891837	1	1	84	tags=30%, list=13%, signal=34%
HALLMARK_P53_PATHWAY	HALLMARK_P53_PATHWAY	Details ...	13	-0.145507	-0.626792	0.91018	0.919452	1	445	tags=85%, list=71%, signal=281%
HALLMARK_APOPTOSIS	HALLMARK_APOPTOSIS	Details ...	11	0.145894	0.582949	0.950311	1	1	138	tags=36%, list=22%, signal=46%
HALLMARK_XENOBIOTIC_METABOLISM	HALLMARK_XENOBIOTIC_METABOLISM	Details ...	9	0.147731	0.550338	0.951883	0.967424	1	468	tags=89%, list=74%, signal=339%

## Sheet: KEGG
NAME	GS<br> follow link to MSigDB	GS DETAILS	SIZE	ES	NES	NOM p-val	FDR q-val	FWER p-val	RANK AT MAX	LEADING EDGE
KEGG_ENDOCYTOSIS	KEGG_ENDOCYTOSIS	Details ...	6	-0.7328	-2.20344	0	0.0166144	0.015	174	tags=100%, list=28%, signal=137%
KEGG_LYSOSOME	KEGG_LYSOSOME	Details ...	7	0.740385	2.32641	0	0.00532778	0.006	168	tags=100%, list=27%, signal=135%
KEGG_SPLICEOSOME	KEGG_SPLICEOSOME	Details ...	10	-0.534461	-2.04616	0.00570342	0.0252128	0.048	237	tags=90%, list=38%, signal=142%
KEGG_GLYCOLYSIS_GLUCONEOGENESIS	KEGG_GLYCOLYSIS_GLUCONEOGENESIS	Details ...	5	0.627476	1.7236	0.0240964	0.156545	0.285	111	tags=80%, list=18%, signal=96%
KEGG_ECM_RECEPTOR_INTERACTION	KEGG_ECM_RECEPTOR_INTERACTION	Details ...	6	-0.542133	-1.64793	0.0293501	0.191508	0.407	188	tags=83%, list=30%, signal=118%
KEGG_SYSTEMIC_LUPUS_ERYTHEMATOSUS	KEGG_SYSTEMIC_LUPUS_ERYTHEMATOSUS	Details ...	6	0.452267	1.36884	0.133047	0.585242	0.84	137	tags=67%, list=22%, signal=84%
KEGG_FOCAL_ADHESION	KEGG_FOCAL_ADHESION	Details ...	7	-0.422619	-1.37026	0.140845	0.507439	0.869	188	tags=71%, list=30%, signal=101%
KEGG_STARCH_AND_SUCROSE_METABOLISM	KEGG_STARCH_AND_SUCROSE_METABOLISM	Details ...	5	0.425879	1.20265	0.216535	0.660505	0.974	111	tags=60%, list=18%, signal=72%
KEGG_MAPK_SIGNALING_PATHWAY	KEGG_MAPK_SIGNALING_PATHWAY	Details ...	15	-0.257251	-1.20965	0.216599	0.738012	0.982	137	tags=47%, list=22%, signal=58%
KEGG_AMINO_SUGAR_AND_NUCLEOTIDE_SUGAR_METABOLISM	KEGG_AMINO_SUGAR_AND_NUCLEOTIDE_SUGAR_METABOLISM	Details ...	5	0.429712	1.20291	0.227273	0.824623	0.974	361	tags=100%, list=57%, signal=232%
KEGG_REGULATION_OF_ACTIN_CYTOSKELETON	KEGG_REGULATION_OF_ACTIN_CYTOSKELETON	Details ...	6	-0.373867	-1.13239	0.274472	0.786397	0.994	188	tags=67%, list=30%, signal=94%
KEGG_HEMATOPOIETIC_CELL_LINEAGE	KEGG_HEMATOPOIETIC_CELL_LINEAGE	Details ...	5	-0.392652	-1.08441	0.333988	0.673753	0.996	260	tags=80%, list=41%, signal=135%
KEGG_PYRIMIDINE_METABOLISM	KEGG_PYRIMIDINE_METABOLISM	Details ...	6	-0.370933	-1.10153	0.334025	0.732661	0.995	295	tags=83%, list=47%, signal=155%
KEGG_HYPERTROPHIC_CARDIOMYOPATHY_HCM	KEGG_HYPERTROPHIC_CARDIOMYOPATHY_HCM	Details ...	7	-0.328068	-1.06045	0.360558	0.645784	0.998	247	tags=71%, list=39%, signal=116%
KEGG_CYTOKINE_CYTOKINE_RECEPTOR_INTERACTION	KEGG_CYTOKINE_CYTOKINE_RECEPTOR_INTERACTION	Details ...	11	0.252493	1.00881	0.405039	0.997598	0.999	244	tags=64%, list=39%, signal=102%
KEGG_INSULIN_SIGNALING_PATHWAY	KEGG_INSULIN_SIGNALING_PATHWAY	Details ...	6	0.317867	0.979149	0.456967	0.931269	1	221	tags=67%, list=35%, signal=102%
KEGG_CALCIUM_SIGNALING_PATHWAY	KEGG_CALCIUM_SIGNALING_PATHWAY	Details ...	10	0.250886	0.966012	0.484375	0.843938	1	348	tags=80%, list=55%, signal=176%
KEGG_NICOTINATE_AND_NICOTINAMIDE_METABOLISM	KEGG_NICOTINATE_AND_NICOTINAMIDE_METABOLISM	Details ...	5	-0.315974	-0.872428	0.593117	0.971558	1	308	tags=80%, list=49%, signal=155%
KEGG_DILATED_CARDIOMYOPATHY	KEGG_DILATED_CARDIOMYOPATHY	Details ...	6	-0.279467	-0.859218	0.606362	0.911567	1	247	tags=67%, list=39%, signal=109%
KEGG_JAK_STAT_SIGNALING_PATHWAY	KEGG_JAK_STAT_SIGNALING_PATHWAY	Details ...	6	0.281067	0.861122	0.623574	0.981465	1	244	tags=67%, list=39%, signal=108%
KEGG_ALZHEIMERS_DISEASE	KEGG_ALZHEIMERS_DISEASE	Details ...	6	-0.2888	-0.840629	0.64741	0.872257	1	136	tags=50%, list=22%, signal=63%
KEGG_ERBB_SIGNALING_PATHWAY	KEGG_ERBB_SIGNALING_PATHWAY	Details ...	5	0.28115	0.78908	0.730924	1	1	454	tags=100%, list=72%, signal=354%
KEGG_AXON_GUIDANCE	KEGG_AXON_GUIDANCE	Details ...	5	-0.272524	-0.766681	0.758755	0.933876	1	209	tags=60%, list=33%, signal=89%
KEGG_VASCULAR_SMOOTH_MUSCLE_CONTRACTION	KEGG_VASCULAR_SMOOTH_MUSCLE_CONTRACTION	Details ...	5	-0.25623	-0.709681	0.819802	0.884847	1	93	tags=40%, list=15%, signal=47%
KEGG_PATHWAYS_IN_CANCER	KEGG_PATHWAYS_IN_CANCER	Details ...	13	-0.163928	-0.710657	0.844262	0.946892	1	288	tags=62%, list=46%, signal=111%
KEGG_PHOSPHATIDYLINOSITOL_SIGNALING_SYSTEM	KEGG_PHOSPHATIDYLINOSITOL_SIGNALING_SYSTEM	Details ...	5	0.238978	0.683039	0.84913	1	1	228	tags=60%, list=36%, signal=93%
KEGG_INOSITOL_PHOSPHATE_METABOLISM	KEGG_INOSITOL_PHOSPHATE_METABOLISM	Details ...	5	0.238978	0.671555	0.866799	1	1	228	tags=60%, list=36%, signal=93%
KEGG_ARRHYTHMOGENIC_RIGHT_VENTRICULAR_CARDIOMYOPATHY_ARVC	KEGG_ARRHYTHMOGENIC_RIGHT_VENTRICULAR_CARDIOMYOPATHY_ARVC	Details ...	5	-0.226837	-0.634519	0.895397	0.909373	1	490	tags=100%, list=78%, signal=444%
KEGG_NEUROACTIVE_LIGAND_RECEPTOR_INTERACTION	KEGG_NEUROACTIVE_LIGAND_RECEPTOR_INTERACTION	Details ...	9	0.163273	0.611705	0.923077	0.998271	1	248	tags=56%, list=39%, signal=90%
KEGG_PURINE_METABOLISM	KEGG_PURINE_METABOLISM	Details ...	8	0.141252	0.490521	0.996124	0.988865	1	542	tags=100%, list=86%, signal=700%

## Sheet: Reactome
NAME	GS<br> follow link to MSigDB	GS DETAILS	SIZE	ES	NES	NOM p-val	FDR q-val	FWER p-val	RANK AT MAX	LEADING EDGE
REACTOME_METABOLISM_OF_RNA	REACTOME_METABOLISM_OF_RNA	Details ...	37	-0.466148	-3.32375	0	0	0	321	tags=95%, list=51%, signal=181%
REACTOME_RRNA_PROCESSING	REACTOME_RRNA_PROCESSING	Details ...	17	-0.506515	-2.49286	0	0.00290604	0.006	321	tags=100%, list=51%, signal=198%
REACTOME_PROCESSING_OF_CAPPED_INTRON_CONTAINING_PRE_MRNA	REACTOME_PROCESSING_OF_CAPPED_INTRON_CONTAINING_PRE_MRNA	Details ...	12	-0.512116	-2.13431	0	0.0569614	0.156	315	tags=100%, list=50%, signal=196%
REACTOME_METABOLISM_OF_CARBOHYDRATES	REACTOME_METABOLISM_OF_CARBOHYDRATES	Details ...	19	0.426643	2.17067	0.00194175	0.0651088	0.118	70	tags=53%, list=11%, signal=57%
REACTOME_INFLUENZA_INFECTION	REACTOME_INFLUENZA_INFECTION	Details ...	5	-0.704473	-1.97526	0.002	0.103785	0.397	191	tags=100%, list=30%, signal=142%
REACTOME_METABOLISM_OF_STEROIDS	REACTOME_METABOLISM_OF_STEROIDS	Details ...	8	0.64687	2.26234	0.00206612	0.0660263	0.061	227	tags=100%, list=36%, signal=154%
REACTOME_DNA_DAMAGE_TELOMERE_STRESS_INDUCED_SENESCENCE	REACTOME_DNA_DAMAGE_TELOMERE_STRESS_INDUCED_SENESCENCE	Details ...	6	0.620533	1.90059	0.00390625	0.284963	0.565	137	tags=83%, list=22%, signal=105%
REACTOME_TRNA_PROCESSING	REACTOME_TRNA_PROCESSING	Details ...	5	-0.70607	-1.93647	0.00397614	0.108201	0.479	190	tags=100%, list=30%, signal=142%
REACTOME_AMYLOID_FIBER_FORMATION	REACTOME_AMYLOID_FIBER_FORMATION	Details ...	6	0.620533	1.89416	0.00583658	0.221244	0.572	137	tags=83%, list=22%, signal=105%
REACTOME_RHO_GTPASE_CYCLE	REACTOME_RHO_GTPASE_CYCLE	Details ...	13	-0.462659	-2.01456	0.00614754	0.0971557	0.317	249	tags=85%, list=39%, signal=137%
REACTOME_RRNA_MODIFICATION_IN_THE_NUCLEUS_AND_CYTOSOL	REACTOME_RRNA_MODIFICATION_IN_THE_NUCLEUS_AND_CYTOSOL	Details ...	10	-0.500805	-1.91952	0.00769231	0.105349	0.524	321	tags=100%, list=51%, signal=200%
REACTOME_MITOCHONDRIAL_PROTEIN_IMPORT	REACTOME_MITOCHONDRIAL_PROTEIN_IMPORT	Details ...	6	-0.6096	-1.84983	0.00806452	0.0991114	0.664	251	tags=100%, list=40%, signal=164%
REACTOME_GLUCOSE_METABOLISM	REACTOME_GLUCOSE_METABOLISM	Details ...	9	0.496249	1.83286	0.00849257	0.211669	0.705	111	tags=67%, list=18%, signal=80%
REACTOME_MRNA_SPLICING	REACTOME_MRNA_SPLICING	Details ...	9	-0.509646	-1.87353	0.0094697	0.0968988	0.627	315	tags=100%, list=50%, signal=197%
REACTOME_PRC2_METHYLATES_HISTONES_AND_DNA	REACTOME_PRC2_METHYLATES_HISTONES_AND_DNA	Details ...	6	0.617333	1.89393	0.00963391	0.177399	0.573	139	tags=83%, list=22%, signal=106%
REACTOME_CELLULAR_RESPONSE_TO_HEAT_STRESS	REACTOME_CELLULAR_RESPONSE_TO_HEAT_STRESS	Details ...	7	-0.551282	-1.83051	0.012	0.0934768	0.709	288	tags=100%, list=46%, signal=182%
REACTOME_HIV_INFECTION	REACTOME_HIV_INFECTION	Details ...	7	-0.563874	-1.81568	0.012848	0.0941943	0.739	190	tags=86%, list=30%, signal=121%
REACTOME_GLYCOLYSIS	REACTOME_GLYCOLYSIS	Details ...	7	0.542811	1.77641	0.0135922	0.250341	0.816	111	tags=71%, list=18%, signal=86%
REACTOME_TRANSPORT_OF_MATURE_TRANSCRIPT_TO_CYTOPLASM	REACTOME_TRANSPORT_OF_MATURE_TRANSCRIPT_TO_CYTOPLASM	Details ...	6	-0.632	-1.90904	0.0139442	0.0992447	0.557	237	tags=100%, list=38%, signal=159%
REACTOME_ECM_PROTEOGLYCANS	REACTOME_ECM_PROTEOGLYCANS	Details ...	5	-0.667732	-1.87443	0.0140845	0.107452	0.625	214	tags=100%, list=34%, signal=150%
REACTOME_SLC_MEDIATED_TRANSMEMBRANE_TRANSPORT	REACTOME_SLC_MEDIATED_TRANSMEMBRANE_TRANSPORT	Details ...	8	-0.52809	-1.78536	0.014433	0.103197	0.791	303	tags=100%, list=48%, signal=190%
REACTOME_GLUCONEOGENESIS	REACTOME_GLUCONEOGENESIS	Details ...	5	0.627476	1.76129	0.0153551	0.239298	0.842	111	tags=80%, list=18%, signal=96%
REACTOME_REGULATION_OF_HSF1_MEDIATED_HEAT_SHOCK_RESPONSE	REACTOME_REGULATION_OF_HSF1_MEDIATED_HEAT_SHOCK_RESPONSE	Details ...	6	-0.5872	-1.78436	0.0177515	0.0974784	0.794	265	tags=100%, list=42%, signal=171%
REACTOME_INFECTIOUS_DISEASE	REACTOME_INFECTIOUS_DISEASE	Details ...	34	-0.270716	-1.83808	0.0194175	0.096564	0.687	192	tags=56%, list=30%, signal=76%
REACTOME_RAC1_GTPASE_CYCLE	REACTOME_RAC1_GTPASE_CYCLE	Details ...	5	-0.616294	-1.72215	0.0204918	0.130155	0.899	120	tags=80%, list=19%, signal=98%
REACTOME_INHIBITION_OF_DNA_RECOMBINATION_AT_TELOMERE	REACTOME_INHIBITION_OF_DNA_RECOMBINATION_AT_TELOMERE	Details ...	5	0.585943	1.64197	0.0229645	0.256876	0.972	137	tags=80%, list=22%, signal=101%
REACTOME_METABOLISM_OF_AMINO_ACIDS_AND_DERIVATIVES	REACTOME_METABOLISM_OF_AMINO_ACIDS_AND_DERIVATIVES	Details ...	13	-0.380632	-1.68765	0.0257426	0.133338	0.933	57	tags=46%, list=9%, signal=50%
REACTOME_METABOLISM_OF_LIPIDS	REACTOME_METABOLISM_OF_LIPIDS	Details ...	23	0.30728	1.71259	0.0277778	0.273178	0.915	306	tags=78%, list=48%, signal=146%
REACTOME_FORMATION_OF_THE_BETA_CATENIN_TCF_TRANSACTIVATING_COMPLEX	REACTOME_FORMATION_OF_THE_BETA_CATENIN_TCF_TRANSACTIVATING_COMPLEX	Details ...	5	0.585943	1.66212	0.0304878	0.292056	0.955	137	tags=80%, list=22%, signal=101%
REACTOME_BASE_EXCISION_REPAIR_AP_SITE_FORMATION	REACTOME_BASE_EXCISION_REPAIR_AP_SITE_FORMATION	Details ...	5	0.585943	1.63564	0.0308642	0.231134	0.973	137	tags=80%, list=22%, signal=101%
REACTOME_MUSCLE_CONTRACTION	REACTOME_MUSCLE_CONTRACTION	Details ...	10	0.416747	1.64006	0.0309478	0.241707	0.972	245	tags=80%, list=39%, signal=129%
REACTOME_SIRT1_NEGATIVELY_REGULATES_RRNA_EXPRESSION	REACTOME_SIRT1_NEGATIVELY_REGULATES_RRNA_EXPRESSION	Details ...	5	0.585943	1.61	0.0313152	0.232628	0.984	137	tags=80%, list=22%, signal=101%
REACTOME_RNA_POLYMERASE_I_PROMOTER_ESCAPE	REACTOME_RNA_POLYMERASE_I_PROMOTER_ESCAPE	Details ...	5	0.585943	1.65734	0.0332717	0.275352	0.961	137	tags=80%, list=22%, signal=101%
REACTOME_CARDIAC_CONDUCTION	REACTOME_CARDIAC_CONDUCTION	Details ...	10	0.416747	1.66592	0.0337302	0.314237	0.952	245	tags=80%, list=39%, signal=129%
REACTOME_RECOGNITION_AND_ASSOCIATION_OF_DNA_GLYCOSYLASE_WITH_SITE_CONTAINING_AN_AFFECTED_PURINE	REACTOME_RECOGNITION_AND_ASSOCIATION_OF_DNA_GLYCOSYLASE_WITH_SITE_CONTAINING_AN_AFFECTED_PURINE	Details ...	5	0.585943	1.6093	0.0342742	0.221384	0.984	137	tags=80%, list=22%, signal=101%
REACTOME_S_PHASE	REACTOME_S_PHASE	Details ...	7	-0.510531	-1.69381	0.0346232	0.143526	0.93	43	tags=57%, list=7%, signal=61%
REACTOME_ACTIVATED_PKN1_STIMULATES_TRANSCRIPTION_OF_AR_ANDROGEN_RECEPTOR_REGULATED_GENES_KLK2_AND_KLK3	REACTOME_ACTIVATED_PKN1_STIMULATES_TRANSCRIPTION_OF_AR_ANDROGEN_RECEPTOR_REGULATED_GENES_KLK2_AND_KLK3		6	0.521333	1.6074	0.0362903	0.201948	0.984	199	tags=83%, list=32%, signal=121%
REACTOME_DNA_METHYLATION	REACTOME_DNA_METHYLATION	Details ...	5	0.585943	1.65049	0.0390144	0.26449	0.968	137	tags=80%, list=22%, signal=101%
REACTOME_DISEASES_OF_PROGRAMMED_CELL_DEATH	REACTOME_DISEASES_OF_PROGRAMMED_CELL_DEATH	Details ...	5	0.585943	1.60905	0.0390947	0.210466	0.984	137	tags=80%, list=22%, signal=101%
REACTOME_RUNX1_REGULATES_GENES_INVOLVED_IN_MEGAKARYOCYTE_DIFFERENTIATION_AND_PLATELET_FUNCTION	REACTOME_RUNX1_REGULATES_GENES_INVOLVED_IN_MEGAKARYOCYTE_DIFFERENTIATION_AND_PLATELET_FUNCTION		6	0.542133	1.60713	0.0393701	0.193007	0.984	186	tags=83%, list=29%, signal=117%
REACTOME_HIV_LIFE_CYCLE	REACTOME_HIV_LIFE_CYCLE		6	-0.538933	-1.60632	0.0395833	0.180746	0.979	190	tags=83%, list=30%, signal=118%
REACTOME_CONDENSATION_OF_PROPHASE_CHROMOSOMES	REACTOME_CONDENSATION_OF_PROPHASE_CHROMOSOMES	Details ...	5	0.585943	1.61762	0.0408163	0.23715	0.981	137	tags=80%, list=22%, signal=101%
REACTOME_PROTEIN_LOCALIZATION	REACTOME_PROTEIN_LOCALIZATION		8	-0.47512	-1.63906	0.0435644	0.16199	0.963	336	tags=100%, list=53%, signal=211%
REACTOME_INTRINSIC_PATHWAY_FOR_APOPTOSIS	REACTOME_INTRINSIC_PATHWAY_FOR_APOPTOSIS	Details ...	5	-0.602236	-1.6886	0.0436433	0.139828	0.932	255	tags=100%, list=40%, signal=166%
REACTOME_MEIOTIC_RECOMBINATION	REACTOME_MEIOTIC_RECOMBINATION		5	0.585943	1.60129	0.046371	0.18959	0.985	137	tags=80%, list=22%, signal=101%
REACTOME_TRANSPORT_OF_INORGANIC_CATIONS_ANIONS_AND_AMINO_ACIDS_OLIGOPEPTIDES	REACTOME_TRANSPORT_OF_INORGANIC_CATIONS_ANIONS_AND_AMINO_ACIDS_OLIGOPEPTIDES		6	-0.5264	-1.58577	0.0486381	0.183033	0.989	303	tags=100%, list=48%, signal=191%
REACTOME_AMINO_ACID_TRANSPORT_ACROSS_THE_PLASMA_MEMBRANE	REACTOME_AMINO_ACID_TRANSPORT_ACROSS_THE_PLASMA_MEMBRANE		5	-0.571565	-1.58599	0.0487288	0.190729	0.989	148	tags=80%, list=23%, signal=104%
REACTOME_TCF_DEPENDENT_SIGNALING_IN_RESPONSE_TO_WNT	REACTOME_TCF_DEPENDENT_SIGNALING_IN_RESPONSE_TO_WNT		7	0.483517	1.54987	0.0507812	0.229713	0.998	148	tags=71%, list=23%, signal=92%
REACTOME_PROGRAMMED_CELL_DEATH	REACTOME_PROGRAMMED_CELL_DEATH		10	-0.403865	-1.55902	0.0518962	0.200141	0.992	255	tags=80%, list=40%, signal=132%
REACTOME_MEMBRANE_TRAFFICKING	REACTOME_MEMBRANE_TRAFFICKING		18	-0.312579	-1.55615	0.0537849	0.19498	0.992	195	tags=61%, list=31%, signal=86%
REACTOME_DNA_REPLICATION	REACTOME_DNA_REPLICATION		5	-0.5377	-1.49533	0.0606061	0.23996	0.998	43	tags=60%, list=7%, signal=64%
REACTOME_DISEASES_OF_METABOLISM	REACTOME_DISEASES_OF_METABOLISM		14	0.340009	1.51634	0.0742972	0.256929	1	285	tags=79%, list=45%, signal=140%
REACTOME_REGULATION_OF_INSULIN_LIKE_GROWTH_FACTOR_IGF_TRANSPORT_AND_UPTAKE_BY_INSULIN_LIKE_GROWTH_FACTOR_BINDING_PROTEINS_IGFBPS	REACTOME_REGULATION_OF_INSULIN_LIKE_GROWTH_FACTOR_IGF_TRANSPORT_AND_UPTAKE_BY_INSULIN_LIKE_GROWTH_FACTOR_BINDING_PROTEINS_IGFBPS		5	-0.557188	-1.51518	0.0781893	0.226517	0.998	157	tags=80%, list=25%, signal=106%
REACTOME_VESICLE_MEDIATED_TRANSPORT	REACTOME_VESICLE_MEDIATED_TRANSPORT		23	-0.26752	-1.48582	0.0818713	0.241389	0.999	195	tags=57%, list=31%, signal=79%
REACTOME_UNFOLDED_PROTEIN_RESPONSE_UPR	REACTOME_UNFOLDED_PROTEIN_RESPONSE_UPR		5	-0.517252	-1.43422	0.0868687	0.281569	1	182	tags=80%, list=29%, signal=112%
REACTOME_INTEGRIN_CELL_SURFACE_INTERACTIONS	REACTOME_INTEGRIN_CELL_SURFACE_INTERACTIONS		5	-0.507668	-1.42967	0.0905263	0.277648	1	188	tags=80%, list=30%, signal=113%
REACTOME_CLATHRIN_MEDIATED_ENDOCYTOSIS	REACTOME_CLATHRIN_MEDIATED_ENDOCYTOSIS		5	-0.509265	-1.43617	0.0941423	0.288397	1	187	tags=80%, list=30%, signal=113%
REACTOME_SIGNALING_BY_VEGF	REACTOME_SIGNALING_BY_VEGF		6	0.4576	1.40537	0.103734	0.40035	1	344	tags=100%, list=55%, signal=218%
REACTOME_HATS_ACETYLATE_HISTONES	REACTOME_HATS_ACETYLATE_HISTONES		6	0.452267	1.38579	0.103734	0.352877	1	137	tags=67%, list=22%, signal=84%
REACTOME_SIGNALING_BY_MET	REACTOME_SIGNALING_BY_MET		7	-0.422619	-1.38235	0.11	0.306739	1	188	tags=71%, list=30%, signal=101%
REACTOME_TRANSPORT_OF_SMALL_MOLECULES	REACTOME_TRANSPORT_OF_SMALL_MOLECULES		24	-0.234281	-1.34632	0.111546	0.319125	1	148	tags=46%, list=23%, signal=58%
REACTOME_MEIOSIS	REACTOME_MEIOSIS		6	0.452267	1.39944	0.11257	0.395318	1	137	tags=67%, list=22%, signal=84%
REACTOME_CARGO_RECOGNITION_FOR_CLATHRIN_MEDIATED_ENDOCYTOSIS	REACTOME_CARGO_RECOGNITION_FOR_CLATHRIN_MEDIATED_ENDOCYTOSIS		5	-0.509265	-1.39833	0.113095	0.304324	1	187	tags=80%, list=30%, signal=113%
REACTOME_SENESCENCE_ASSOCIATED_SECRETORY_PHENOTYPE_SASP	REACTOME_SENESCENCE_ASSOCIATED_SECRETORY_PHENOTYPE_SASP		6	0.452267	1.3894	0.113546	0.383153	1	137	tags=67%, list=22%, signal=84%
REACTOME_DEPOSITION_OF_NEW_CENPA_CONTAINING_NUCLEOSOMES_AT_THE_CENTROMERE	REACTOME_DEPOSITION_OF_NEW_CENPA_CONTAINING_NUCLEOSOMES_AT_THE_CENTROMERE		6	0.452267	1.38895	0.114851	0.370913	1	137	tags=67%, list=22%, signal=84%
REACTOME_TRANSPORT_TO_THE_GOLGI_AND_SUBSEQUENT_MODIFICATION	REACTOME_TRANSPORT_TO_THE_GOLGI_AND_SUBSEQUENT_MODIFICATION		5	-0.496486	-1.3918	0.116773	0.303442	1	195	tags=80%, list=31%, signal=115%
REACTOME_OXIDATIVE_STRESS_INDUCED_SENESCENCE	REACTOME_OXIDATIVE_STRESS_INDUCED_SENESCENCE		6	0.452267	1.37192	0.116832	0.363187	1	137	tags=67%, list=22%, signal=84%
REACTOME_RAC3_GTPASE_CYCLE	REACTOME_RAC3_GTPASE_CYCLE		5	-0.475399	-1.34721	0.123106	0.326473	1	82	tags=60%, list=13%, signal=68%
REACTOME_RHOA_GTPASE_CYCLE	REACTOME_RHOA_GTPASE_CYCLE		6	-0.444533	-1.34918	0.126482	0.332522	1	249	tags=83%, list=39%, signal=136%
REACTOME_ERCC6_CSB_AND_EHMT2_G9A_POSITIVELY_REGULATE_RRNA_EXPRESSION	REACTOME_ERCC6_CSB_AND_EHMT2_G9A_POSITIVELY_REGULATE_RRNA_EXPRESSION		6	0.452267	1.35405	0.127273	0.350256	1	137	tags=67%, list=22%, signal=84%
REACTOME_HCMV_EARLY_EVENTS	REACTOME_HCMV_EARLY_EVENTS		6	0.452267	1.36754	0.13	0.349224	1	137	tags=67%, list=22%, signal=84%
REACTOME_EXTRACELLULAR_MATRIX_ORGANIZATION	REACTOME_EXTRACELLULAR_MATRIX_ORGANIZATION		14	-0.312225	-1.37927	0.133201	0.30186	1	214	tags=64%, list=34%, signal=95%
REACTOME_ACTIVATION_OF_ANTERIOR_HOX_GENES_IN_HINDBRAIN_DEVELOPMENT_DURING_EARLY_EMBRYOGENESIS	REACTOME_ACTIVATION_OF_ANTERIOR_HOX_GENES_IN_HINDBRAIN_DEVELOPMENT_DURING_EARLY_EMBRYOGENESIS		6	0.452267	1.39144	0.133333	0.393586	1	137	tags=67%, list=22%, signal=84%
REACTOME_REPRODUCTION	REACTOME_REPRODUCTION		6	0.452267	1.36764	0.133475	0.359244	1	137	tags=67%, list=22%, signal=84%
REACTOME_HDACS_DEACETYLATE_HISTONES	REACTOME_HDACS_DEACETYLATE_HISTONES		6	0.452267	1.34905	0.135338	0.348321	1	137	tags=67%, list=22%, signal=84%
REACTOME_SIGNALING_BY_WNT	REACTOME_SIGNALING_BY_WNT		10	0.369726	1.38647	0.139785	0.363181	1	148	tags=60%, list=23%, signal=77%
REACTOME_MEIOTIC_SYNAPSIS	REACTOME_MEIOTIC_SYNAPSIS		6	0.452267	1.3548	0.145418	0.358934	1	137	tags=67%, list=22%, signal=84%
REACTOME_INNATE_IMMUNE_SYSTEM	REACTOME_INNATE_IMMUNE_SYSTEM		35	0.19233	1.30846	0.157371	0.387971	1	281	tags=63%, list=45%, signal=107%
REACTOME_RHO_GTPASES_ACTIVATE_PKNS	REACTOME_RHO_GTPASES_ACTIVATE_PKNS		7	0.401786	1.32781	0.158607	0.369844	1	199	tags=71%, list=32%, signal=103%
REACTOME_SIGNALING_BY_RHO_GTPASES_MIRO_GTPASES_AND_RHOBTB3	REACTOME_SIGNALING_BY_RHO_GTPASES_MIRO_GTPASES_AND_RHOBTB3		21	-0.233802	-1.29448	0.158954	0.36943	1	249	tags=62%, list=39%, signal=99%
REACTOME_PLATELET_ACTIVATION_SIGNALING_AND_AGGREGATION	REACTOME_PLATELET_ACTIVATION_SIGNALING_AND_AGGREGATION		8	-0.379615	-1.31948	0.167019	0.344306	1	80	tags=50%, list=13%, signal=57%
REACTOME_HEMOSTASIS	REACTOME_HEMOSTASIS		22	-0.232273	-1.27689	0.170588	0.375492	1	89	tags=36%, list=14%, signal=41%
REACTOME_DISORDERS_OF_TRANSMEMBRANE_TRANSPORTERS	REACTOME_DISORDERS_OF_TRANSMEMBRANE_TRANSPORTERS		6	-0.416	-1.28054	0.177489	0.37997	1	372	tags=100%, list=59%, signal=241%
REACTOME_CELLULAR_SENESCENCE	REACTOME_CELLULAR_SENESCENCE		9	0.341729	1.25792	0.190196	0.446305	1	137	tags=56%, list=22%, signal=70%
REACTOME_CELL_CYCLE	REACTOME_CELL_CYCLE		22	-0.22787	-1.26531	0.195266	0.383752	1	63	tags=32%, list=10%, signal=34%
REACTOME_CELL_CYCLE_MITOTIC	REACTOME_CELL_CYCLE_MITOTIC		18	-0.241979	-1.217	0.204589	0.445958	1	63	tags=33%, list=10%, signal=36%
REACTOME_SIGNALING_BY_NOTCH	REACTOME_SIGNALING_BY_NOTCH		9	0.341729	1.26947	0.207171	0.438959	1	137	tags=56%, list=22%, signal=70%
REACTOME_DISEASES_OF_SIGNAL_TRANSDUCTION_BY_GROWTH_FACTOR_RECEPTORS_AND_SECOND_MESSENGERS	REACTOME_DISEASES_OF_SIGNAL_TRANSDUCTION_BY_GROWTH_FACTOR_RECEPTORS_AND_SECOND_MESSENGERS		9	-0.327617	-1.19615	0.229084	0.469608	1	288	tags=78%, list=46%, signal=141%
REACTOME_SIGNALING_BY_NUCLEAR_RECEPTORS	REACTOME_SIGNALING_BY_NUCLEAR_RECEPTORS		14	0.26175	1.18335	0.242424	0.568532	1	153	tags=50%, list=24%, signal=65%
REACTOME_APOPTOSIS	REACTOME_APOPTOSIS		8	-0.351926	-1.18988	0.247505	0.469803	1	255	tags=75%, list=40%, signal=124%
REACTOME_NEGATIVE_EPIGENETIC_REGULATION_OF_RRNA_EXPRESSION	REACTOME_NEGATIVE_EPIGENETIC_REGULATION_OF_RRNA_EXPRESSION		7	0.356685	1.17216	0.255187	0.57739	1	137	tags=57%, list=22%, signal=72%
REACTOME_CHROMOSOME_MAINTENANCE	REACTOME_CHROMOSOME_MAINTENANCE		10	-0.306602	-1.1576	0.256	0.516654	1	63	tags=40%, list=10%, signal=44%
REACTOME_TRANSCRIPTIONAL_REGULATION_BY_SMALL_RNAS	REACTOME_TRANSCRIPTIONAL_REGULATION_BY_SMALL_RNAS		7	0.356685	1.16846	0.269231	0.571068	1	137	tags=57%, list=22%, signal=72%
REACTOME_SARS_COV_INFECTIONS	REACTOME_SARS_COV_INFECTIONS		10	-0.302093	-1.13738	0.278226	0.5413	1	192	tags=60%, list=30%, signal=85%
REACTOME_ESTROGEN_DEPENDENT_GENE_EXPRESSION	REACTOME_ESTROGEN_DEPENDENT_GENE_EXPRESSION		9	0.316006	1.15574	0.280665	0.583052	1	153	tags=56%, list=24%, signal=72%
REACTOME_HCMV_INFECTION	REACTOME_HCMV_INFECTION		7	0.356685	1.14364	0.287402	0.568848	1	137	tags=57%, list=22%, signal=72%
REACTOME_MITOTIC_PROPHASE	REACTOME_MITOTIC_PROPHASE		7	0.356685	1.13413	0.290076	0.552575	1	137	tags=57%, list=22%, signal=72%
REACTOME_RUNX1_REGULATES_TRANSCRIPTION_OF_GENES_INVOLVED_IN_DIFFERENTIATION_OF_HSCS	REACTOME_RUNX1_REGULATES_TRANSCRIPTION_OF_GENES_INVOLVED_IN_DIFFERENTIATION_OF_HSCS		7	0.356685	1.14972	0.291339	0.58159	1	137	tags=57%, list=22%, signal=72%
REACTOME_PRE_NOTCH_EXPRESSION_AND_PROCESSING	REACTOME_PRE_NOTCH_EXPRESSION_AND_PROCESSING		7	0.356685	1.14725	0.291985	0.573398	1	137	tags=57%, list=22%, signal=72%
REACTOME_HCMV_LATE_EVENTS	REACTOME_HCMV_LATE_EVENTS		7	0.356685	1.13503	0.297071	0.561388	1	137	tags=57%, list=22%, signal=72%
REACTOME_MAPK_FAMILY_SIGNALING_CASCADES	REACTOME_MAPK_FAMILY_SIGNALING_CASCADES		12	-0.261847	-1.10608	0.299803	0.564104	1	207	tags=58%, list=33%, signal=85%
REACTOME_RNA_POLYMERASE_I_TRANSCRIPTION	REACTOME_RNA_POLYMERASE_I_TRANSCRIPTION		7	0.356685	1.13591	0.301181	0.571011	1	137	tags=57%, list=22%, signal=72%
REACTOME_MET_PROMOTES_CELL_MOTILITY	REACTOME_MET_PROMOTES_CELL_MOTILITY		6	-0.373867	-1.12877	0.301255	0.53552	1	188	tags=67%, list=30%, signal=94%
REACTOME_CELL_SURFACE_INTERACTIONS_AT_THE_VASCULAR_WALL	REACTOME_CELL_SURFACE_INTERACTIONS_AT_THE_VASCULAR_WALL		8	-0.314807	-1.10227	0.306889	0.549781	1	357	tags=88%, list=57%, signal=199%
REACTOME_POST_TRANSLATIONAL_PROTEIN_MODIFICATION	REACTOME_POST_TRANSLATIONAL_PROTEIN_MODIFICATION		45	-0.147516	-1.1296	0.308	0.544619	1	195	tags=44%, list=31%, signal=60%
REACTOME_RHO_GTPASE_EFFECTORS	REACTOME_RHO_GTPASE_EFFECTORS		10	0.287601	1.09743	0.313609	0.596849	1	199	tags=60%, list=32%, signal=86%
REACTOME_ASPARAGINE_N_LINKED_GLYCOSYLATION	REACTOME_ASPARAGINE_N_LINKED_GLYCOSYLATION		9	-0.309932	-1.10482	0.328326	0.555464	1	299	tags=78%, list=47%, signal=146%
REACTOME_TRANSMISSION_ACROSS_CHEMICAL_SYNAPSES	REACTOME_TRANSMISSION_ACROSS_CHEMICAL_SYNAPSES		15	0.239827	1.09956	0.356	0.604078	1	314	tags=73%, list=50%, signal=143%
REACTOME_BIOLOGICAL_OXIDATIONS	REACTOME_BIOLOGICAL_OXIDATIONS		8	0.321429	1.08629	0.357564	0.60585	1	272	tags=75%, list=43%, signal=130%
REACTOME_SIGNALING_BY_GPCR	REACTOME_SIGNALING_BY_GPCR		18	-0.204731	-1.05383	0.376518	0.626983	1	191	tags=50%, list=30%, signal=70%
REACTOME_INTERFERON_SIGNALING	REACTOME_INTERFERON_SIGNALING		9	-0.282422	-1.03458	0.378543	0.629558	1	246	tags=67%, list=39%, signal=108%
REACTOME_IMMUNOREGULATORY_INTERACTIONS_BETWEEN_A_LYMPHOID_AND_A_NON_LYMPHOID_CELL	REACTOME_IMMUNOREGULATORY_INTERACTIONS_BETWEEN_A_LYMPHOID_AND_A_NON_LYMPHOID_CELL		5	-0.355591	-1.0239	0.39	0.638478	1	157	tags=60%, list=25%, signal=79%
REACTOME_DEVELOPMENTAL_BIOLOGY	REACTOME_DEVELOPMENTAL_BIOLOGY		31	-0.16172	-1.04179	0.393814	0.626566	1	250	tags=55%, list=40%, signal=86%
REACTOME_INTEGRATION_OF_ENERGY_METABOLISM	REACTOME_INTEGRATION_OF_ENERGY_METABOLISM		5	0.36869	1.03334	0.393822	0.697238	1	273	tags=80%, list=43%, signal=140%
REACTOME_INTRACELLULAR_SIGNALING_BY_SECOND_MESSENGERS	REACTOME_INTRACELLULAR_SIGNALING_BY_SECOND_MESSENGERS		13	-0.242345	-1.048	0.395248	0.626267	1	191	tags=54%, list=30%, signal=76%
REACTOME_TRANSCRIPTIONAL_REGULATION_OF_GRANULOPOIESIS	REACTOME_TRANSCRIPTIONAL_REGULATION_OF_GRANULOPOIESIS		8	0.284912	1.00948	0.404624	0.709808	1	137	tags=50%, list=22%, signal=63%
REACTOME_REGULATION_OF_INSULIN_SECRETION	REACTOME_REGULATION_OF_INSULIN_SECRETION		5	0.36869	1.0254	0.40568	0.701762	1	273	tags=80%, list=43%, signal=140%
REACTOME_B_WICH_COMPLEX_POSITIVELY_REGULATES_RRNA_EXPRESSION	REACTOME_B_WICH_COMPLEX_POSITIVELY_REGULATES_RRNA_EXPRESSION		8	0.284912	1.00128	0.413861	0.701999	1	137	tags=50%, list=22%, signal=63%
REACTOME_FACTORS_INVOLVED_IN_MEGAKARYOCYTE_DEVELOPMENT_AND_PLATELET_PRODUCTION	REACTOME_FACTORS_INVOLVED_IN_MEGAKARYOCYTE_DEVELOPMENT_AND_PLATELET_PRODUCTION		5	-0.359425	-0.991583	0.430612	0.667163	1	407	tags=100%, list=65%, signal=279%
REACTOME_TRANSCRIPTIONAL_REGULATION_BY_RUNX1	REACTOME_TRANSCRIPTIONAL_REGULATION_BY_RUNX1		11	0.253519	1.01102	0.43125	0.719288	1	186	tags=55%, list=29%, signal=76%
REACTOME_GENE_SILENCING_BY_RNA	REACTOME_GENE_SILENCING_BY_RNA		8	0.284912	0.989354	0.441718	0.71457	1	137	tags=50%, list=22%, signal=63%
REACTOME_PTEN_REGULATION	REACTOME_PTEN_REGULATION		5	-0.347923	-0.991163	0.444444	0.657273	1	288	tags=80%, list=46%, signal=146%
REACTOME_M_PHASE	REACTOME_M_PHASE		11	-0.250293	-0.995471	0.453649	0.681299	1	190	tags=55%, list=30%, signal=77%
REACTOME_FATTY_ACID_METABOLISM	REACTOME_FATTY_ACID_METABOLISM		5	0.35623	1.00434	0.457692	0.708247	1	407	tags=100%, list=65%, signal=279%
REACTOME_NICOTINATE_METABOLISM	REACTOME_NICOTINATE_METABOLISM		5	0.353035	0.97343	0.460159	0.723533	1	409	tags=100%, list=65%, signal=282%
REACTOME_TELOMERE_MAINTENANCE	REACTOME_TELOMERE_MAINTENANCE		9	-0.270632	-0.995454	0.461216	0.670146	1	43	tags=33%, list=7%, signal=35%
REACTOME_UB_SPECIFIC_PROCESSING_PROTEASES	REACTOME_UB_SPECIFIC_PROCESSING_PROTEASES		8	0.284912	0.981149	0.461233	0.718887	1	137	tags=50%, list=22%, signal=63%
REACTOME_SARS_COV_1_INFECTION	REACTOME_SARS_COV_1_INFECTION		5	-0.354633	-0.979069	0.46184	0.659297	1	410	tags=100%, list=65%, signal=283%
REACTOME_ESR_MEDIATED_SIGNALING	REACTOME_ESR_MEDIATED_SIGNALING		11	-0.24868	-0.980608	0.476923	0.667139	1	191	tags=55%, list=30%, signal=77%
REACTOME_DEUBIQUITINATION	REACTOME_DEUBIQUITINATION		8	0.284912	0.963636	0.478351	0.731743	1	137	tags=50%, list=22%, signal=63%
REACTOME_BASE_EXCISION_REPAIR	REACTOME_BASE_EXCISION_REPAIR		8	0.284912	0.954285	0.489279	0.738401	1	137	tags=50%, list=22%, signal=63%
REACTOME_SARS_COV_2_INFECTION	REACTOME_SARS_COV_2_INFECTION		5	-0.354633	-0.966102	0.496932	0.673478	1	410	tags=100%, list=65%, signal=283%
REACTOME_INTERLEUKIN_1_FAMILY_SIGNALING	REACTOME_INTERLEUKIN_1_FAMILY_SIGNALING		6	0.314667	0.949321	0.504817	0.725882	1	223	tags=67%, list=35%, signal=102%
REACTOME_ION_CHANNEL_TRANSPORT	REACTOME_ION_CHANNEL_TRANSPORT		5	0.332907	0.950397	0.515936	0.734817	1	43	tags=40%, list=7%, signal=43%
REACTOME_POTENTIAL_THERAPEUTICS_FOR_SARS	REACTOME_POTENTIAL_THERAPEUTICS_FOR_SARS		5	-0.326837	-0.913558	0.533469	0.749798	1	175	tags=60%, list=28%, signal=82%
REACTOME_RNA_POLYMERASE_II_TRANSCRIPTION	REACTOME_RNA_POLYMERASE_II_TRANSCRIPTION		56	-0.108478	-0.913814	0.534694	0.760659	1	333	tags=63%, list=53%, signal=121%
REACTOME_NEUROTRANSMITTER_RECEPTORS_AND_POSTSYNAPTIC_SIGNAL_TRANSMISSION	REACTOME_NEUROTRANSMITTER_RECEPTORS_AND_POSTSYNAPTIC_SIGNAL_TRANSMISSION		9	-0.254019	-0.908402	0.548708	0.748998	1	474	tags=100%, list=75%, signal=396%
REACTOME_TP53_REGULATES_METABOLIC_GENES	REACTOME_TP53_REGULATES_METABOLIC_GENES		7	0.278617	0.900268	0.551724	0.800641	1	366	tags=86%, list=58%, signal=202%
REACTOME_NEDDYLATION	REACTOME_NEDDYLATION		7	-0.276557	-0.900076	0.57438	0.753351	1	189	tags=57%, list=30%, signal=81%
REACTOME_HOMOLOGY_DIRECTED_REPAIR	REACTOME_HOMOLOGY_DIRECTED_REPAIR		7	0.277015	0.894076	0.578431	0.800586	1	367	tags=86%, list=58%, signal=203%
REACTOME_SIGNALING_BY_INTERLEUKINS	REACTOME_SIGNALING_BY_INTERLEUKINS		16	0.19248	0.902963	0.582061	0.8068	1	275	tags=63%, list=44%, signal=108%
REACTOME_REGULATION_OF_TP53_ACTIVITY	REACTOME_REGULATION_OF_TP53_ACTIVITY		7	-0.262363	-0.86945	0.615679	0.79858	1	288	tags=71%, list=46%, signal=130%
REACTOME_AUTOPHAGY	REACTOME_AUTOPHAGY		6	0.2832	0.875106	0.621242	0.825198	1	453	tags=100%, list=72%, signal=351%
REACTOME_CELL_CYCLE_CHECKPOINTS	REACTOME_CELL_CYCLE_CHECKPOINTS		6	0.284	0.853433	0.630165	0.855445	1	137	tags=50%, list=22%, signal=63%
REACTOME_INTERLEUKIN_4_AND_INTERLEUKIN_13_SIGNALING	REACTOME_INTERLEUKIN_4_AND_INTERLEUKIN_13_SIGNALING		6	-0.2872	-0.851087	0.637427	0.798731	1	137	tags=50%, list=22%, signal=63%
REACTOME_G_ALPHA_I_SIGNALLING_EVENTS	REACTOME_G_ALPHA_I_SIGNALLING_EVENTS		12	-0.202746	-0.836495	0.643923	0.803252	1	191	tags=50%, list=30%, signal=70%
REACTOME_DEGRADATION_OF_THE_EXTRACELLULAR_MATRIX	REACTOME_DEGRADATION_OF_THE_EXTRACELLULAR_MATRIX		6	-0.2808	-0.854792	0.655378	0.803202	1	141	tags=50%, list=22%, signal=64%
REACTOME_CONSTITUTIVE_SIGNALING_BY_ABERRANT_PI3K_IN_CANCER	REACTOME_CONSTITUTIVE_SIGNALING_BY_ABERRANT_PI3K_IN_CANCER		5	-0.307668	-0.85845	0.661224	0.807426	1	187	tags=60%, list=30%, signal=85%
REACTOME_TRANSLATION	REACTOME_TRANSLATION		10	-0.208857	-0.813469	0.664622	0.820346	1	313	tags=70%, list=50%, signal=137%
REACTOME_RAB_GEFS_EXCHANGE_GTP_FOR_GDP_ON_RABS	REACTOME_RAB_GEFS_EXCHANGE_GTP_FOR_GDP_ON_RABS		6	-0.275733	-0.835109	0.665996	0.795248	1	39	tags=33%, list=6%, signal=35%
REACTOME_NEGATIVE_REGULATION_OF_THE_PI3K_AKT_NETWORK	REACTOME_NEGATIVE_REGULATION_OF_THE_PI3K_AKT_NETWORK		5	-0.307668	-0.845613	0.667323	0.797729	1	187	tags=60%, list=30%, signal=85%
REACTOME_POSITIVE_EPIGENETIC_REGULATION_OF_RRNA_EXPRESSION	REACTOME_POSITIVE_EPIGENETIC_REGULATION_OF_RRNA_EXPRESSION		9	0.22901	0.821642	0.673597	0.891655	1	137	tags=44%, list=22%, signal=56%
REACTOME_BINDING_AND_UPTAKE_OF_LIGANDS_BY_SCAVENGER_RECEPTORS	REACTOME_BINDING_AND_UPTAKE_OF_LIGANDS_BY_SCAVENGER_RECEPTORS		5	0.299361	0.827426	0.674699	0.892485	1	64	tags=40%, list=10%, signal=44%
REACTOME_SIGNALING_BY_RECEPTOR_TYROSINE_KINASES	REACTOME_SIGNALING_BY_RECEPTOR_TYROSINE_KINASES		23	-0.143664	-0.805508	0.676923	0.823409	1	188	tags=43%, list=30%, signal=60%
REACTOME_PHOSPHOLIPID_METABOLISM	REACTOME_PHOSPHOLIPID_METABOLISM		7	0.244963	0.796834	0.725451	0.924733	1	387	tags=86%, list=61%, signal=219%
REACTOME_CELLULAR_RESPONSE_TO_CHEMICAL_STRESS	REACTOME_CELLULAR_RESPONSE_TO_CHEMICAL_STRESS		6	0.254133	0.78283	0.729339	0.936545	1	366	tags=83%, list=58%, signal=197%
REACTOME_DISEASES_OF_GLYCOSYLATION	REACTOME_DISEASES_OF_GLYCOSYLATION		8	0.223515	0.773313	0.729675	0.940533	1	333	tags=75%, list=53%, signal=157%
REACTOME_GLYCEROPHOSPHOLIPID_BIOSYNTHESIS	REACTOME_GLYCEROPHOSPHOLIPID_BIOSYNTHESIS		6	-0.260533	-0.77554	0.768932	0.860596	1	364	tags=83%, list=58%, signal=195%
REACTOME_POTASSIUM_CHANNELS	REACTOME_POTASSIUM_CHANNELS		6	-0.2528	-0.733017	0.778481	0.903228	1	474	tags=100%, list=75%, signal=398%
REACTOME_RAB_REGULATION_OF_TRAFFICKING	REACTOME_RAB_REGULATION_OF_TRAFFICKING		7	-0.228022	-0.754974	0.782353	0.881989	1	39	tags=29%, list=6%, signal=30%
REACTOME_INOSITOL_PHOSPHATE_METABOLISM	REACTOME_INOSITOL_PHOSPHATE_METABOLISM		5	-0.261981	-0.725478	0.787449	0.902318	1	468	tags=100%, list=74%, signal=384%
REACTOME_ANTIGEN_PROCESSING_UBIQUITINATION_PROTEASOME_DEGRADATION	REACTOME_ANTIGEN_PROCESSING_UBIQUITINATION_PROTEASOME_DEGRADATION		8	-0.211477	-0.722203	0.791188	0.885528	1	27	tags=25%, list=4%, signal=26%
REACTOME_OPIOID_SIGNALLING	REACTOME_OPIOID_SIGNALLING		5	0.262939	0.733043	0.799595	0.982761	1	213	tags=60%, list=34%, signal=90%
REACTOME_PHASE_II_CONJUGATION_OF_COMPOUNDS	REACTOME_PHASE_II_CONJUGATION_OF_COMPOUNDS		5	0.258786	0.723996	0.800821	0.984551	1	468	tags=100%, list=74%, signal=384%
REACTOME_CYTOKINE_SIGNALING_IN_IMMUNE_SYSTEM	REACTOME_CYTOKINE_SIGNALING_IN_IMMUNE_SYSTEM		28	0.116915	0.739412	0.804734	0.985314	1	244	tags=50%, list=39%, signal=78%
REACTOME_CLASS_A_1_RHODOPSIN_LIKE_RECEPTORS	REACTOME_CLASS_A_1_RHODOPSIN_LIKE_RECEPTORS		8	0.20947	0.716475	0.805882	0.960298	1	184	tags=50%, list=29%, signal=70%
REACTOME_G_ALPHA_Q_SIGNALLING_EVENTS	REACTOME_G_ALPHA_Q_SIGNALLING_EVENTS		8	-0.207865	-0.722436	0.813121	0.895589	1	187	tags=50%, list=30%, signal=70%
REACTOME_EPIGENETIC_REGULATION_OF_GENE_EXPRESSION	REACTOME_EPIGENETIC_REGULATION_OF_GENE_EXPRESSION		13	0.166169	0.72016	0.814596	0.965879	1	139	tags=38%, list=22%, signal=48%
REACTOME_CHROMATIN_MODIFYING_ENZYMES	REACTOME_CHROMATIN_MODIFYING_ENZYMES		15	0.153355	0.70532	0.821359	0.942103	1	199	tags=47%, list=32%, signal=67%
REACTOME_DNA_DOUBLE_STRAND_BREAK_REPAIR	REACTOME_DNA_DOUBLE_STRAND_BREAK_REPAIR		9	0.197392	0.715731	0.821643	0.950049	1	367	tags=78%, list=58%, signal=183%
REACTOME_CELLULAR_RESPONSE_TO_STARVATION	REACTOME_CELLULAR_RESPONSE_TO_STARVATION		6	0.235733	0.723098	0.828125	0.973769	1	62	tags=33%, list=10%, signal=37%
REACTOME_CELLULAR_RESPONSES_TO_EXTERNAL_STIMULI	REACTOME_CELLULAR_RESPONSES_TO_EXTERNAL_STIMULI		31	0.110806	0.715547	0.833002	0.939279	1	75	tags=23%, list=12%, signal=24%
REACTOME_METABOLISM_OF_NUCLEOTIDES	REACTOME_METABOLISM_OF_NUCLEOTIDES		6	-0.226933	-0.685954	0.833333	0.909483	1	385	tags=83%, list=61%, signal=212%
REACTOME_METABOLISM_OF_WATER_SOLUBLE_VITAMINS_AND_COFACTORS	REACTOME_METABOLISM_OF_WATER_SOLUBLE_VITAMINS_AND_COFACTORS		7	0.206731	0.675399	0.849505	0.957675	1	501	tags=100%, list=79%, signal=480%
REACTOME_LEISHMANIA_INFECTION	REACTOME_LEISHMANIA_INFECTION		7	0.216346	0.690032	0.862579	0.950978	1	495	tags=100%, list=78%, signal=459%
REACTOME_NERVOUS_SYSTEM_DEVELOPMENT	REACTOME_NERVOUS_SYSTEM_DEVELOPMENT		15	0.151732	0.67137	0.867076	0.931194	1	200	tags=47%, list=32%, signal=67%
REACTOME_NEUTROPHIL_DEGRANULATION	REACTOME_NEUTROPHIL_DEGRANULATION		23	0.121568	0.675215	0.868526	0.947265	1	172	tags=39%, list=27%, signal=52%
REACTOME_ADAPTIVE_IMMUNE_SYSTEM	REACTOME_ADAPTIVE_IMMUNE_SYSTEM		17	0.135083	0.65699	0.869565	0.91697	1	213	tags=47%, list=34%, signal=69%
REACTOME_PI3K_AKT_SIGNALING_IN_CANCER	REACTOME_PI3K_AKT_SIGNALING_IN_CANCER		6	-0.2256	-0.687902	0.875256	0.917808	1	491	tags=100%, list=78%, signal=446%
REACTOME_TP53_REGULATES_TRANSCRIPTION_OF_CELL_DEATH_GENES	REACTOME_TP53_REGULATES_TRANSCRIPTION_OF_CELL_DEATH_GENES		6	0.2144	0.662513	0.878243	0.931174	1	496	tags=100%, list=79%, signal=463%
REACTOME_NEURONAL_SYSTEM	REACTOME_NEURONAL_SYSTEM		18	0.133587	0.65822	0.88024	0.925525	1	478	tags=89%, list=76%, signal=356%
REACTOME_METABOLISM_OF_VITAMINS_AND_COFACTORS	REACTOME_METABOLISM_OF_VITAMINS_AND_COFACTORS		7	0.206731	0.674903	0.886905	0.93725	1	501	tags=100%, list=79%, signal=480%
REACTOME_CLASS_I_MHC_MEDIATED_ANTIGEN_PROCESSING_PRESENTATION	REACTOME_CLASS_I_MHC_MEDIATED_ANTIGEN_PROCESSING_PRESENTATION		9	-0.183637	-0.676891	0.88694	0.909836	1	27	tags=22%, list=4%, signal=23%
REACTOME_TP53_REGULATES_TRANSCRIPTION_OF_GENES_INVOLVED_IN_CYTOCHROME_C_RELEASE	REACTOME_TP53_REGULATES_TRANSCRIPTION_OF_GENES_INVOLVED_IN_CYTOCHROME_C_RELEASE		5	-0.229712	-0.640506	0.89834	0.935134	1	362	tags=80%, list=57%, signal=186%
REACTOME_BIOSYNTHESIS_OF_THE_N_GLYCAN_PRECURSOR_DOLICHOL_LIPID_LINKED_OLIGOSACCHARIDE_LLO_AND_TRANSFER_TO_A_NASCENT_PROTEIN	REACTOME_BIOSYNTHESIS_OF_THE_N_GLYCAN_PRECURSOR_DOLICHOL_LIPID_LINKED_OLIGOSACCHARIDE_LLO_AND_TRANSFER_TO_A_NASCENT_PROTEIN		5	0.228115	0.634294	0.909474	0.929477	1	361	tags=80%, list=57%, signal=185%
REACTOME_GPCR_LIGAND_BINDING	REACTOME_GPCR_LIGAND_BINDING		10	-0.155233	-0.603395	0.933054	0.956604	1	157	tags=40%, list=25%, signal=52%
REACTOME_TRANSCRIPTIONAL_REGULATION_BY_TP53	REACTOME_TRANSCRIPTIONAL_REGULATION_BY_TP53		19	-0.116873	-0.585615	0.94084	0.958756	1	328	tags=63%, list=52%, signal=128%
REACTOME_SIGNALING_BY_NTRKS	REACTOME_SIGNALING_BY_NTRKS		5	-0.198083	-0.539039	0.961315	0.973984	1	508	tags=100%, list=81%, signal=509%
REACTOME_SIGNALING_BY_TGFB_FAMILY_MEMBERS	REACTOME_SIGNALING_BY_TGFB_FAMILY_MEMBERS		5	0.194569	0.540346	0.968944	0.982666	1	382	tags=80%, list=61%, signal=201%
REACTOME_DNA_REPAIR	REACTOME_DNA_REPAIR		15	0.113853	0.527776	0.978587	0.977822	1	13	tags=13%, list=2%, signal=13%
