# Supplementary material for: An organ-on-chip model of pulmonary arterial hypertension identifies a BMPR2-SOX17-prostacyclin signalling axis
Source: Commun Biol. 2022 Nov 7;5:1192. doi: 10.1038/s42003-022-04169-z (PMC9640600; doi:10.1038/s42003-022-04169-z)
Supplement: Supplementary file 9 — Supplementary Data 6 [file 42003_2022_4169_MOESM9_ESM.xlsx]

## Sheet: Overlap ECFC.Adeno.Normox
162 common elements in "Adeno EC" and "ECFC EC":
BMPR2
LIPG
IRF6
NT5E
FZD4
FLNC
F2RL3
RASIP1
ADAMTS1
MAVS
AHNAK2
IFIT2
ANXA11
DKK2
FGD5
ABI3
EPHB4
HDAC7
ARAP1
GRB14
BCL2L1
NOX4
SH3TC1
FLI1
SLC9A3R2
TNFRSF1A
KNOP1
MLLT11
OSGIN2
CSF1
DPYSL3
DDAH1
THEMIS2
NFIB
PFN2
TRIM8
RPS2
SPOCK1
RPIA
TMEM87B
DIPK1B
WASF1
ZBTB7B
HEY2
PTP4A2
TNIK
TLN1
MYOF
FRMD4A
TOP2B
CAV1
PABPC1
ZNF652
SEPTIN9
NXPE3
NACC2
EDIL3
NOP53
SENCR
SNHG7
TBL3
STIM1
GALNT7
MDM2
MAP4K4
ENKUR
KIF1C
PDGFB
SLC48A1
SDC4
JAG1
CDC25A
CENPV
YBX3
MICALL1
NBEAL1
RAB29
DYSF
ABLIM3
L3HYPDH
MLLT1
PTX3
LSM8
CAVIN1
DYM
LMNA
NAP1L5
ABCC4
METAP2
CHD4
PARD3
NOG
KLF2
FEN1
CPT1A
ISYNA1
SSBP2
LDLRAP1
RPL3
SMC2
GBGT1
TMEM65
TRIM16L
TRIP6
GNL3L
PDLIM3
HGH1
LRRC32
ELOF1
TOP1MT
SQLE
HMGA1
NRGN
SLC47A1
BCAR1
EVA1A
RRM2B
RPL12
CD14
TXNRD2
DMAP1
AARS1
APLN
PHLDA3
SOX12
HOMER1
GRB10
MED16
ALDH9A1
CSNK2A2
TRIM22
TRIM5
AP2A1
SKIV2L
NMT1
SIPA1
ERCC2
RAC2
KLHL5
PITRM1
FDFT1
KLF9
TST
ECI2
NUP133
KPNA2
HMOX1
CAVIN2
PTPN4
NIPSNAP1
RALA
DNAJB4
TECPR1
HSP90AA1
BCAM
IPPK
TACC3
ZNF468
TMEM200A
NAAA
EVI5L
RPS6

## Sheet: ECFC EC Normox
1065 genes total
A1BG
AADACP1
AARS1
ABCA3
ABCB1
ABCC10
ABCC4
ABCC9
ABI3
ABLIM3
ABTB2
ACADS
ACER2
ACOX3
ACP5
ACSF3
ACTR6
ADAM19
ADAMTS1
ADAMTS12
ADGRE5
ADGRG6
ADIRF
AEN
AFDN
AFTPH
AGBL5
AGFG2
AGMO
AHCY
AHNAK2
AIG1
ALDH1A2
ALDH3A2
ALDH4A1
ALDH9A1
ALPK1
ALX1
AMDHD2
AMFR
AMOT
ANKRD12
ANKRD26
ANKRD33B
ANKRD55
ANKS6
ANO10
ANO2
ANP32B
ANP32E
ANPEP
ANXA11
AP2A1
AP3D1
AP3M2
APLN
APOBEC3C
APOBEC3G
APOL1
APOL2
APOL3
APOL6
ARAP1
ARHGAP10
ARHGAP12
ARHGAP20
ARHGAP23
ARHGAP25
ARHGAP28
ARHGAP6
ARHGEF17
ARL4C
ARL4D
ARL6
ARMC5
ARNTL2
ASAH1
ASB3
ASB8
ASCC3
ASS1
ATIC
ATL1
ATP13A2
ATP9B
ATRX
AVEN
AXL
B3GNT9
BAG2
BCAM
BCAR1
BCL2
BCL2L1
BCOR
BIN1
BLOC1S6
BMPR2
BOP1
BORCS5
BRD9
BTN3A2
C12orf50
C16orf74
C17orf58
C19orf48
C1orf198
C1orf54
C1QTNF6
C1RL
C20orf204
C20orf27
C2CD2
C3orf70
C6orf141
C7orf50
CA12
CADPS2
CALM3
CALML4
CAMK1
CAMKK1
CARD10
CARD16
CAV1
CAVIN1
CAVIN2
CBR3
CBWD1
CBWD3
CBX6
CC2D1A
CCAR1
CCDC188
CCDC22
CCDC24
CCDC25
CCDC66
CCDC69
CCDC91
CCNF
CCNG1
CCT6A
CD14
CD24
CD47
CD99L2
CDC25A
CDC25B
CDCA5
CDKN2C
CEBPB
CEMIP2
CENPQ
CENPV
CEP131
CETP
CFAP54
CGNL1
CHD1L
CHD4
CHEK2
CHERP
CHIC2
CHP1
CHSY3
CHTF8
CINP
CIZ1
CLDN11
CLEC3B
CLNS1A
CNP
CNTROB
COL12A1
COL13A1
COL18A1
COL4A6
COL6A1
COL6A2
COLEC12
COPG2
COQ8A
CORO1C
COTL1
COX15
CPT1A
CRACR2B
CRAT
CREB5
CRLF1
CRTAC1
CRYBB2P1
CSF1
CSNK1A1
CSNK2A2
CTDSPL
CTSB
CTSK
CTSS
CTU1
CTU2
CUL4B
CWF19L2
CXCL1
CXCL11
CXCR4
CYBA
CYP51A1
DAPK1
DAPK2
DCAF4
DCAF8
DCUN1D4
DDAH1
DDR2
DDX49
DDX54
DEAF1
DENND1A
DGKZ
DHCR24
DHRS3
DIAPH1
DIPK1B
DKK2
DMAC1
DMAP1
DNAAF4
DNAJB12
DNAJB4
DNAJB5
DNASE1L3
DNM3OS
DOK3
DOK5
DPP4
DPYSL3
DROSHA
DSN1
DTL
DTNA
DUSP7
DUXAP8
DYM
DYSF
EBP
ECHDC2
ECHDC3
ECI2
ECSIT
EDA2R
EDIL3
EEA1
EEF1AKMT3
EEF2
EFNB1
EFNB3
EGFL7
EGFR
EHBP1
EHBP1L1
EHD1
EIF1B-AS1
EIF2B4
EIF3C
EIF4G1
EIF5B
ELOF1
ELP1
ELP2
ENKUR
ENTPD6
EPB41
EPHB1
EPHB2
EPHB4
EPHX1
EPM2A
EPRS1
EPS15L1
ERBB2
ERCC1
ERCC2
ERGIC1
ERVK13-1
ESF1
ESM1
ETFBKMT
ETS2
EVA1A
EVI5L
EXOC3
EXOC4
EXOC6B
EXOSC4
EZR
F2RL1
F2RL3
FADS2
FAH
FAM110B
FAM111A
FAM131A
FAM174B
FAM189B
FAM207A
FAM53B
FAM83G
FARS2
FBLN2
FBLN7
FBN2
FBXL19
FBXO2
FBXO44
FBXW7
FCHO1
FCSK
FDFT1
FDXR
FEN1
FGD5
FGD6
FGF2
FGFR3
FGGY
FHL1
FKBP10
FKBP11
FLI1
FLII
FLNA
FLNC
FLOT2
FLYWCH1
FMNL2
FNDC4
FOXF1
FOXP1
FOXRED1
FRMD4A
FSIP2
FST
FTL
FTX
FUT11
FUT8
FYCO1
FZD4
FZD5
G6PD
GAB1
GABARAPL1
GADL1
GAK
GALNT6
GALNT7
GAPDH
GBGT1
GBP2
GBX2
GCA
GCKR
GCNT2
GCSHP5
GDF7
GEMIN4
GEN1
GET4
GFER
GGT5
GGT7
GIT1
GNL3L
GOLPH3L
GPATCH3
GPATCH4
GPC1
GPI
GPR173
GPR37
GPRC5B
GPRIN3
GPX3
GRB10
GRB14
GRK3
GSDMD
GSE1
GSTM3
GSTZ1
GTF2F1
GTF2IP12
GTF2IRD1
GTPBP6
GULP1
HDAC7
HEBP1
HELLPAR
HENMT1
HES1
HEXIM2
HEY2
HGH1
HHIPL1
HIC1
HIF1A-AS3
HLA-E
HLA-H
HLA-L
HMBOX1
HMGA1
HMGN2
HMOX1
HNRNPA1P48
HOMER1
HOXA11
HOXA11-AS
HOXB7
HOXD1
HSD17B14
HSP90AA1
HSPB6
HSPD1
HTR1D
ICAM2
IFI35
IFIT1
IFIT2
IFT27
IFT57
IGF2
IGF2BP2
IGFBP3
IGFBP6
IL17RC
IMP4
IMPDH2
INKA2
INPP5A
INSIG1
INTS1
IPO4
IPO5
IPPK
IRF2BPL
IRF6
ISG20
ISOC1
ISOC2
ISYNA1
ITGA3
ITGB8
ITPR3
ITPRIP
JAG1
JARID2
KATNA1
KAZN
KBTBD11
KCND1
KCNK6
KCNMB2-AS1
KCNN4
KCNQ1OT1
KCTD2
KDM1A
KIAA0930
KIAA1324L
KIAA1328
KIF1C
KLF2
KLF4
KLF9
KLHDC8B
KLHL5
KNOP1
KPNA2
KRT18
KSR2
L3HYPDH
LBH
LDLRAP1
LENG9
LETM1
LGALS3BP
LIMS2
LINC00323
LINC00339
LINC00343
LINC00504
LINC00607
LINC00630
LINC00674
LINC00839
LINC01006
LINC01206
LINC01235
LINC01278
LINC01608
LINC01615
LINC01814
LINC02503
LINC02802
LIPG
LLGL1
LMNA
LOXL1
LOXL1-AS1
LPCAT1
LPIN1
LRFN4
LRP3
LRP4
LRP5
LRPPRC
LRRC32
LRRC36
LRRC42
LRRC8D
LSM8
LTA4H
LXN
LY6E
LYRM1
MAGED4B
MALAT1
MALT1
MAMLD1
MAOA
MAP2K2
MAP2K3
MAP2K7
MAP3K8
MAP4K4
MAP7D3
MAPK11
MAPK12
MAPRE3
MARCHF2
MAST3
MAVS
MBD2
MCC
MCM5
MCPH1-AS1
MDM2
ME1
ME3
MED16
MEIS2
MEPCE
MEST
METAP2
METTL16
METTL22
METTL26
METTL7A
MFAP2
MFNG
MICAL1
MICALL1
MIER1
MILR1
MLLT1
MLLT11
MMRN1
MOB3A
MORC2
MORC4
MOV10
MPP1
MPP6
MR1
MRAS
MRE11
MROH1
MRPL11
MRPL35
MRPL38
MRPS16
MRPS6
MSH3
MSH6
MSMO1
MT1G
MT1M
MTCH2
MTDH
MTHFS
MTMR12
MTND2P28
MTRNR2L1
MVK
MX1
MXRA8
MYL5
MYL6B
MYOF
NAAA
NACC2
NAP1L5
NBAS
NBEAL1
NBPF14
NEDD4
NEDD9
NEIL2
NELFE
NES
NET1
NF2
NFATC2
NFE2L3
NFIB
NFIC
NFKBIE
NIPSNAP1
NLE1
NLRC3
NME3
NMNAT3
NMT1
NNT
NOG
NOP14
NOP53
NOP9
NOTCH2NLA
NOX4
NPAS2
NPEPL1
NQO1
NR2F1
NR2F2
NRDE2
NRG1
NRGN
NT5C
NT5E
NUP133
NUP155
NUP43
NUPR1
NVL
NXPE3
ODC1
ODF2L
OGFR
OLMALINC
OPHN1
OR4F17
ORC4
OSBPL2
OSBPL3
OSGIN2
P2RX7
PABPC1
PACC1
PALM
PALM2AKAP2
PAQR4
PARD3
PARP12
PCAT19
PCDH10
PCDHB5
PCDHGB5
PCDHGB6
PCM1
PCNX3
PCSK5
PDGFB
PDGFC
PDLIM1
PDLIM3
PER3
PEX26
PFN2
PHF19
PHLDA3
PHLDB2
PHYHIP
PHYKPL
PIGL
PIGP
PIK3CG
PIP4K2C
PITRM1
PKN1
PLA2G4A
PLA2R1
PLAC9
PLAT
PLCB3
PLD6
PLEKHA6
PLEKHF1
PLEKHG4
PLEKHO2
PLGRKT
PLK2
PLTP
PNMA2
PNPLA6
PNPO
POLR2M
POLR3G
POMK
POP7
PPIAP22
PPIF
PPIG
PPM1F
PPM1G
PPP1R12C
PPP1R16A
PRADC1
PRKAR2B
PRKCH
PRKG1
PRKG1-AS1
PRMT7
PROB1
PRPF6
PRPH2
PRR5L
PRR7
PRRT3
PRTFDC1
PRTG
PSD3
PSMB10
PSMB8
PSMB9
PSME2
PSME4
PTDSS2
PTEN
PTGR1
PTGS1
PTMA
PTP4A2
PTPA
PTPN4
PTPRS
PTX3
PURA
PUS3
PUS7L
PYGL
QPCT
RAB11FIP5
RAB13
RAB29
RAB33B
RAB34
RABEP2
RABL6
RAC2
RAD50
RAI1
RALA
RAN
RANGAP1
RAPGEF3
RASAL2-AS1
RASIP1
RBM10
RBM24
RBM25
RCN1
RCN1P2
RDH10
RECQL5
RELB
REPS1
RETREG3
REXO4
RFLNB
RFT1
RFTN1
RIMKLB
RIN1
RIPK3
RNASEH2A
RNF125
RNF144B
RNF168
RNF169
RNF19B
RNH1
RPE
RPIA
RPL12
RPL22L1
RPL22P1
RPL27A
RPL3
RPL4
RPS2
RPS2P46
RPS3
RPS6
RPS6KA6
RPS6KB2
RPUSD1
RPUSD4
RRM2B
RRP1
RSAD1
RSF1
RSRP1
RTCA-AS1
RUVBL2
RXRA
S100A3
S1PR3
SAMD12
SAMSN1
SARM1
SART3
SBF1
SCARB1
SCRIB
SDC1
SDC4
SEMA3A
SEMA3F
SEMA4B
SENCR
SEPTIN9
SERGEF
SERPIND1
SERTAD4-AS1
SH3TC1
SHISA9
SIAE
SIGIRR
SIPA1
SKIV2L
SLC12A2
SLC12A7
SLC12A9
SLC15A3
SLC25A3
SLC25A51P4
SLC26A4-AS1
SLC27A3
SLC35E4
SLC40A1
SLC47A1
SLC48A1
SLC9A3R2
SLC9A7
SLC9A8
SLIT2
SLX1A
SMAGP
SMARCA4
SMC2
SMIM11B
SND1
SNHG26
SNHG7
SNX24
SNX30
SNX5
SORBS1
SORD
SOX12
SOX4
SP100
SPNS2
SPOCK1
SQLE
SQOR
SREBF2
SREK1
SRPK2
SSBP2
SSBP4
STAG3L4
STIM1
STK32C
STMN3
STRIP2
STX17-AS1
SULT1A1
SULT1A3
SUSD1
SYNGAP1
SYS1
SYT14
SYTL3
TACC2
TACC3
TACSTD2
TAF3
TAOK3
TAP1
TAP2
TAPBP
TARS2
TASOR
TATDN2
TBC1D1
TBC1D2
TBC1D24
TBC1D32
TBC1D8B
TBCD
TBL3
TCAF2
TCF15
TCF19
TCF25
TCF3
TEAD4
TECPR1
TGFBR3
TGM2
THAP7
THEMIS2
THOC5
THOP1
THUMPD3
TIAL1
TIGD1
TIMM9
TIMP1
TIMP3
TKT
TLE3
TLN1
TMCO4
TMEM106C
TMEM156
TMEM171
TMEM200A
TMEM212
TMEM237
TMEM44
TMEM65
TMEM87B
TMOD1
TNFAIP2
TNFAIP8L1
TNFRSF14
TNFRSF1A
TNFRSF6B
TNFSF18
TNIK
TNIP1
TOE1
TOM1L1
TOMM7
TOP1
TOP1MT
TOP2B
TOR4A
TP53I11
TPCN1
TPM2
TPM3P9
TPRN
TPTEP1
TRAC
TRAF7
TRAPPC9
TRBC2
TRIM16L
TRIM22
TRIM24
TRIM25
TRIM37
TRIM44
TRIM5
TRIM56
TRIM7
TRIM8
TRIP6
TSBP1-AS1
TSC22D1
TSHZ1
TSPAN13
TSPAN4
TSPAN5
TSPYL1
TST
TTC12
TTC27
TTTY10
TUFT1
TUSC3
TWIST2
TXLNA
TXNRD2
UBA6-AS1
UBE2L6
UBQLN4
UBR4
UCP2
UFSP2
UGDH-AS1
ULK3
ULK4
USP1
USP18
USP32P1
VAV2
VIPR1
VPS18
VPS51
VWCE
WARS2
WASF1
WDPCP
WDR25
WDR34
WDR53
WDR73
WNK4
WRAP73
XACT
XPNPEP3
YBX3
YIPF2
ZADH2
ZBED3-AS1
ZBTB17
ZBTB7B
ZCCHC2
ZCCHC24
ZFP64
ZFYVE9
ZGRF1
ZMAT3
ZNF181
ZNF219
ZNF232
ZNF277
ZNF282
ZNF317
ZNF331
ZNF415
ZNF416
ZNF431
ZNF438
ZNF467
ZNF468
ZNF490
ZNF500
ZNF564
ZNF598
ZNF606
ZNF652
ZNF66
ZNF736
ZNF772
ZNF791
ZNF793
ZP3
ZXDB

## Sheet: Adeno EC Normox
1828 genes total
BMPR2
SMAD6
LIPG
ITGAV
TCIM
IL13RA1
TMED2
PODXL
GJA5
ADGRL4
TGFBR2
CRIM1
KDR
RHOBTB3
TLR4
OSGIN1
GASK1B
SLC7A11
TMEM30A
CYP1B1
KCTD12
IRF6
TRNP1
ARHGAP24
C15orf54
GOLGA2
GPR180
PPIP5K2
ENG
TEK
SLC26A2
NRCAM
RSAD2
GNG12
CALD1
MAP7D1
SRXN1
FAM214B
MACF1
ADAMTS9
L3MBTL3
AGO1
PHLDB1
NORAD
CDH5
ITGA2
CHPF2
RPS6KA2
TTLL12
HHIP
CLCN3
HYAL2
TNFAIP8L3
TTYH3
ADGRL2
PRSS23
RBMS1
MYBL2
ZMPSTE24
MARCHF4
FSTL1
CLEC14A
PKIG
ERG28
LOX
ID1
SWAP70
SLC39A13
GNG11
CCPG1
CKAP4
PLOD2
PICALM
SH2D3C
TMEM14C
ARPC5
CALU
ROBO4
KHNYN
IDH1
ITGB3
GALNT1
ADAM9
HGSNAT
SHC1
NT5E
NTN4
SMAP2
TTL
CAV2
FZD4
SLC25A24
LYL1
FLNC
F2RL3
COL4A1
TBX1
HERC5
PGF
C5orf15
RAB6A
ZDHHC2
FAM20C
RASIP1
MYCT1
DDAH2
TSPAN17
RAI2
DKK1
ADAMTS1
BLCAP
F2R
PRKACB
SLC16A3
UBA5
DGKA
TM6SF1
TMEM100
MMRN2
CCL2
YWHAG
MAVS
EGLN2
PARP4
TXNDC15
FURIN
ITPR2
GPX8
PLEKHG5
AAR2
EMP1
AHNAK2
NRAS
COL5A1
MARK4
ARHGAP18
PSTPIP2
CCDC9B
CDH11
MAP3K6
CD93
IL4R
PTPRA
ALDH1A3
MIR22HG
IFIT2
SYNPO
ANXA11
THBD
PNMA1
ACVRL1
MKNK2
PREX1
HNRNPC
PAPSS2
PDLIM4
COPG1
CD58
DKK2
CACNA2D1
PAM
COCH
FGD5
DPY19L1
CAP1
TMBIM1
SLC35A5
NOVA2
CAPRIN2
ABI3
UBE4A
EPHB4
HDAC7
CRABP2
ZBED6
S1PR1
TPM1
STARD8
RAB3B
ATP6V1A
MIR31HG
ARAP1
IL17RB
GRB14
BCL2L1
TBX18
ARRB1
DNAJC30
INSYN2B
NOX4
CARD6
HHIP-AS1
TUBA1A
SH3TC1
CNOT11
TSPAN15
FLI1
DAB2
RNF187
WWC3
PRKAR1A
PTPRB
PEAR1
INTS3
ATP2B4
RACK1
SLC9A3R2
IL1R1
FADD
CNOT4
CSF2RB
TUBB6
TNFRSF1A
CDC42EP2
CDH2
CDC42BPB
KNOP1
BAG1
LINC02762
MARCKS
SHISA5
MLLT11
TSKU
FANCC
LMAN2L
FAT4
ARHGAP31
STK38
TNFSF4
SAE1
EXOC3L1
SFXN3
CLDN4
MTFR1L
TPRG1L
FEZ2
ENC1
LRRC4
ZDHHC21
AP1M1
NRSN2
LAMA5
SLFN11
CALHM2
UPF3B
NUDT18
OSGIN2
CCDC68
RASA3
ERLEC1
CSF1
RALB
CD34
ART4
CDKN2A
DNAJB6
ICAM1
FAM107B
DPYSL3
TAMM41
SYNRG
CAVIN3
LFNG
NOS3
LEPROT
ADAM10
NEK6
DDAH1
AHNAK
NAV3
SCRN1
LYPLA1
TMEM18
MAP3K11
TP53BP1
MARVELD1
DOLK
TSPAN31
VEPH1
ATP8B2
THEMIS2
NFIB
PCLAF
PFN2
GLT8D1
ARL10
RAPGEF2
CRACD
IL6ST
TRIM8
ASF1A
DYNLL1
NLRP1
RPS2
SPOCK1
DYNC1I2
RPIA
CCDC71L
CYB561
ATP8B1
GAL
ALKBH6
LUC7L3
NIBAN2
MMGT1
MAP4
NKAIN1
TNFRSF21
TMEM87B
DIPK1B
IL1RL1
KLF13
HLA-A
FRMD5
B4GALT6
FRMD4B
RBM34
FUCA2
AURKB
TRIM27
STING1
IGF2BP3
WASF1
SNCA
LINC01013
CALHM5
SEC23A
ELOVL1
EXOSC5
ZBTB7B
HARS2
CLIC4
FAM124B
BTN1A1
DHX32
SLC12A4
KLHL9
ZNF84
CCDC116
RRAS
PLXNA4
MALL
SERPINB8
BAG3
HEY2
NOB1
RAB32
SKAP2
FAM43A
STC2
ARFGEF1
LIX1L
PCYT2
ITGA5
NDUFC2
SNHG8
CALCRL
CENPU
ANGPTL4
ADAMTS6
KCNH3
PARS2
ITPR1
JCAD
C8orf58
DHH
ACAA2
CCDC59
SH3PXD2B
THBS1
MAX
COX20
TTLL1
CDKN1A
CAT
AKR1C3
RAPGEF5
PTP4A2
PCTP
CTTN
SMTN
ANTXR2
SORBS2
FLT1
HEATR3
RBM38
ARMCX6
CYP1A1
SPINT1
SERINC3
SLC2A6
MYOM3
CPNE5
ENDOD1
ITGB3BP
AHRR
BET1
SH2B3
LMAN1
BRI3
UHMK1
PDE7A
ALKBH2
MELTF
GPR4
TNIK
GOLIM4
PARVA
PIP5K1C
RNF14
TLN1
SNTB2
MCM7
FGF12
LRRC34
WAC-AS1
MAGED1
VPS13D
TSPAN9
MYOF
BTF3
PTTG1
TCEAL8
SLFN5
PHF20L1
COL2A1
SEL1L3
MICAL2
ARAP3
FLVCR1
FRMD4A
FAAP100
MAML3
SS18
ALDH1A1
DBNL
SET
BIRC5
TRIM47
BMX
ITGA6
LMO2
WDFY1
UBBP4
SPIN4
GIMAP8
APPBP2
RHOJ
RAP2C
ALG6
TSPAN14
HAPLN3
RELN
VASP
SMCO2
DYNC1H1
PMS2P1
C14orf132
STMP1
NEU3
BTBD19
NACA
TRPV2
CPSF2
SNRPB
USP22
ASAP2
PXN
PLEKHA1
PRDX3
ERG
TRIOBP
CAMTA2
TOP2B
DAZAP2
PJA2
C1QL1
BLOC1S3
SMAD9
ZNRF1
PTPN14
RAB31
PCGF2
TMEM200C
EHD2
SMURF2
RPL17-C18orf32
LASP1
POR
TMEM263
LRP10
CTDSP1
MVP
NUDT12
CHCHD2
CAV1
APOE
FAM210B
NAV1
CLN8
NYNRIN
SRGN
CLTC
HABP4
CDYL2
LIMK2
RPS20
RPS26P19
IQCJ-SCHIP1
JAK1
CENPO
C1orf52
MATR3
CENPH
NUDT16
AAK1
ZBTB4
IFIH1
KLHL6
PABPC1
SOX18
MBTPS2
EIF4H
MARCKSL1
SLC38A3
C8orf82
CASP6
TMEM222
ADCY4
CCNB1IP1
ARMCX1
EIF2AK4
SLC38A2
ZNF652
SEPTIN9
NXPE3
LZTR1
HNRNPA0
DNAJC10
PLXNB2
VPS54
NACC2
FMNL3
RECK
TRAK1
SRD5A3
MAP1A
VPS25
ARHGEF19
TADA3
FANCI
ZNF622
NAP1L1
C1orf43
ARHGEF1
IFIT3
SAMD9L
RPLP0
CMTM8
MACROH2A1
MYLK3
DPP7
NPR2
NAB2
NEB
CCNE1
TPT1
RHBDF1
PMAIP1
LINC00963
PREB
DYNC1LI2
GCNT1
TMEM14B
NDUFS2
ALCAM
ELN
SH3RF3
RBL2
ATF4
EDIL3
CIP2A
RET
LYPD1
FBN1
UBE2C
ATOH8
SYNJ2BP
TM2D2
NOP53
TMIGD3
TMEM184B
MIR100HG
SENCR
TGFB1
GALNT16
AIFM1
SDHA
RRBP1
SNHG7
PKIB
TBL3
KIZ
ARL6IP5
ARHGEF15
EXOC5
NOP58
FAM110A
CAPN5
TNFAIP1
BAK1
VPS50
ZNF280D
SEPTIN11
TMED8
STIM1
MTAP
VSTM4
PDGFA
PTPN9
NAA50
SLFN12
TM4SF1
USP6NL
HK1
CDK8
UNG
SLC19A1
TNS1
GABBR2
CENPK
SGSM2
ABRACL
DCHS1
JUP
UBR7
KDELR3
TXNDC11
GPRC5A
EXT1
SMAD7
GALNT7
FXR1
MGAT2
PNPLA8
GLCE
MDM2
PLPP3
CLK2
MDK
IGBP1
MTRES1
ERVMER34-1
OCLN
CCDC50
BTK
TM9SF3
RHOBTB2
MAP4K4
ATM
FLOT1
UBE2D2
IFNAR1
SLC35E2B
GPR83
PRKAR2A
VPS39
EBNA1BP2
NOL4L
SLC66A1L
PALMD
PMP22
ADIPOR2
ENKUR
ZNF653
PRDX4
STAT1
KIF1C
PIP4K2B
SPRYD3
ILK
SNHG15
RNF213
PRDM6
TBC1D15
HERC6
CRIP2
SPAST
NME1-NME2
DDX39B
SLC33A1
FAN1
NFE2L2
AKAP11
RFX1
TMEM250
DAG1
PDGFB
ABHD4
SLC48A1
LENG8
TBC1D19
TM9SF1
NNMT
SFXN2
TMEM38B
ZFYVE26
ACTR10
RABEPK
RAB43
PSMD14
ITGB5
SDC4
JAG1
RUSC2
DGCR8
SLC25A13
PIGM
HLA-C
ST8SIA4
DIAPH2
ZSCAN31
SRSF1
RWDD2A
HDAC8
SEC14L1
C3orf14
CEP170
SNHG19
RPS4X
TRAF3
RNF146
RPS5
STOM
TAX1BP3
AP3S1
CDC25A
GTPBP2
KCTD21
MFSD14B
SLC9B2
GEMIN5
ATMIN
MBOAT2
CENPV
LACTB
DNAJC1
YBX3
MICALL1
OLA1
SMIM29
TGOLN2
IKBKE
BMP6
SNRPF
SPRY2
AP1S1
ANKMY1
TMEM161A
ABHD16A
TMEM234
NBEAL1
RAB29
DBT
REXO2
IARS2
SLC30A5
DNAJC5
CTC1
DERL1
PTPRG
DYSF
DHX9
LRIG3
ABLIM3
FLNB
RN7SK
ENTPD7
TET2
ATP6V1G2-DDX39B
C20orf194
SCFD2
L3HYPDH
CDCP1
TCTA
FAM171A1
CHST3
RRM2
SUN2
ELMO2
RAI14
EDEM1
DNAJC13
CRYZ
PLIN3
ANKRD50
PRPS1
PSMC3IP
UNC45A
ERLIN1
MAN2B1
CFLAR
DDX23
SLC10A3
MLLT1
PRNP
CCN1
SSR1
NOVA1
SOX17
ATR
LSM3
RAB23
C15orf40
PTX3
VASH1
HOXB4
LSM8
EFCAB12
RNASE1
TMBIM4
DUT
YRDC
SGPP1
CAVIN1
ITPRIPL2
IL12A
NHSL1
DBNDD2
RDH11
ADD1
SUPT3H
SEC23IP
WWC1
ACTR2
RPL24
BCL3
FDPS
RANBP1
ZSWIM5
MSANTD3
TAOK1
RAB40C
CHMP6
STXBP5
AFAP1L1
SEPTIN6
RIPOR1
UBB
PPP2R5D
GCLM
SMIM12
FAU
USE1
SPTLC2
UBC
PRUNE2
DYM
PRDM15
SERINC5
TRMT1L
LMNA
EPN2
ANXA6
MTRF1
ALDH1L2
TF
CEP120
DCAF6
ITGB1
PIK3C2A
CYBC1
SMPD1
ANXA1
POLD4
MAP2
ASPRV1
JKAMP
LPCAT2
ABCF3
KAT7
KLF3
HOMER3
LEPROTL1
NAP1L5
HNRNPF
SHISA2
RFXANK
DCTN5
BBS7
MRRF
TXNDC9
RPS24
GYS1
U2AF1
CMSS1
DTWD2
ABCC4
PLPP4
SOS1
METAP2
GRK5
CHD4
SEPTIN8
CROT
ITSN1
LRRFIP1
ZNF516
PIGH
NENF
IBTK
C7orf31
SF3B4
MMP2
ANKS4B
COPS2
RPL35P2
SIDT2
CD320
WDR13
CHURC1
PARD3
NAGK
YWHAZ
ZDHHC18
GORASP1
EIF1AX
TMEM33
PRR34-AS1
RHOB
ACLY
AFAP1
SLC35F6
TMEM127
DDB1
PDHB
CDH4
MCM2
INTS5
MON1B
MPV17L2
BTBD1
PI4K2B
BCL9L
LRRC45
FBXO9
ARID2
PDCD1LG2
BSG
UQCC1
VCL
GAS5
CAMLG
MTUS1
PPP3CB
IMPACT
RHOC
SOD2
STX6
NEK1
EXOC6
NRN1
CAPN7
SLC39A14
ZNF185
SSRP1
RTN4
H6PD
MDFI
VPS13B
ZYG11B
EMC1-AS1
NOG
CCN2
KLF2
SULT1C2
RPS15A
FEN1
SHROOM4
MKLN1
EEF1G
OSER1
WDR61
DTX3
LRP11
GET1
SCX
SLITRK4
GATAD1
CXCL12
B4GALNT4
SLC25A40
BIVM
DOK4
RAB11A
HMGB1
TCEAL9
EIF4B
RPL26
SH3KBP1
TWSG1
RNPEPL1
GIPC1
KCTD20
PTPN12
SDHC
VLDLR-AS1
MAPK6
AQP3
B2M
SEC14L1P1
ATP11A
USP28
NME2
KIAA1143
UTP4
SLC30A9
MYRIP
BLOC1S4
LAT2
CNBP
PIAS3
VPS37B
CPT1A
PCNX4
ISYNA1
SLC38A10
UBE2B
SSBP2
MON2
KRT18P17
PRMT2
ILF2
TAGLN
UNK
DUSP18
LDLRAP1
GCNA
PCBP2
GNG10
KDM4A
YWHAE
SNX16
SLC35G2
RPL3
SNHG17
TTC5
MPRIP
LRRFIP1P1
RPF1
EIF3L
EIF3D
PPP2R2A
TPM4
PPP1R15A
IL15RA
DLAT
CERS5
ITGA10
EIF4A1
SEC24D
SMC2
MIR3945HG
RPS17
AKAP17A
TGFB1I1
EIF2A
RPS2P5
TYMS
SLC4A2
ECM1
PCDH7
GTF3C2
ZNF699
TP53INP2
ERBIN
ZBTB38
TBCA
PA2G4
AMIGO2
PSMG4
SASH1
ARHGAP45
TAOK2
FAF1
CCND1
DDX17
ACP6
RPS15
TMEM147
KLF10
BTG3
EIF3A
AFMID
NPHP4
EFNB2
ANKRD1
RGS4
SRRT
ZC3H15
UAP1
PMEPA1
SLC22A5
MAP1LC3A
TK1
CSRP1
INPP4A
GPHN
AATF
KHSRP
EFCAB14
NUDCD2
NPR1
CARNMT1
GBGT1
STX2
CPTP
RPGR
PTER
KLF6
ENY2
DGLUCY
CTNS
FERMT3
ZFYVE21
STXBP2
GCSH
TXNRD1
GBA2
ARMCX3
ATG9A
OSTF1
ARHGEF37
ZNF480
TMEM65
BMP2
NARF
GIMAP4
KDM4B
HOMEZ
RMDN1
TRIM16L
EID1
APEH
DGCR11
TBC1D10A
CFL2
WASHC5
ARPC1A
TRIP6
CNTNAP1
IGFBP2
GNL3L
ACTN1
ZFP90
COQ9
ATE1
PDLIM3
GTPBP4
TWF2
CDC25C
ITSN2
ROBO3
GPR153
PHKA1
YBX1
RNF121
ACSL4
KLHL4
DBN1
SLC2A3
MAGT1
TMEM179B
ZFP91
NPIPB2
TPTEP2-CSNK1E
ZYX
HSPA8
SAMD9
HGH1
NMRAL2P
ZNF706
DSTN
RTL6
TOMM6
HEATR5B
NCAPG2
C2CD3
GLRX
TCP1
ARHGAP29
HERC4
LRRC32
ANXA7
GNG4
TRAK2
EIF3F
POLR3F
CKS1B
EXOC7
CMIP
H2BC12
JAG2
SNHG32
AMOTL2
HLA-B
ELOF1
HLA-F
TOP1MT
SQLE
MAPK1
CELF2
SFT2D3
UBE2N
ABCB6
ALDH3B1
TMEM189
SERPINE2
OSBPL9
USF1
PNRC2
EIF3E
PSME3
HMGA1
ECSCR
HINT1
SMYD3
TBC1D4
NRGN
OSTM1
NCOA1
EIF1
SLC47A1
SLC1A3
POLH
CDK5
EML1
VPS13C
SNX8
INPP5D
CERK
RAB28
NIPA1
TSC22D2
AP5B1
FBL
CAB39
SYF2
TRIM38
PET117
CCNYL1
VOPP1
TRAPPC8
INPPL1
LSM14A
IL17RA
SERINC2
JPH1
MAFG-DT
RCL1
XRCC4
KDM1B
CSMD1
ASB7
BCAR1
LAMB1
DCAF12
EVA1A
SERPINB6
ARFGEF2
HDDC3
DIAPH3
SLC1A1
XKR8
KRAS
TPX2
TRADD
RNF149
EFHD2
CPSF4
WFS1
NRP1
PWP1
CDCA2
GANC
TXNDC5
RPL23AP82
TMEM64
PAQR8
ZNF555
TIRAP
TMEM230
YTHDF2
HOXA2
DCUN1D2
ACOT11
EXTL3-AS1
DOCK11
NMRK1
RRM2B
TAB2
RPL12
CHST14
FRAT2
RIN3
TMEM154
EFR3A
NDUFC1
WDR12
IGF1R
VKORC1L1
RPL39
RALGAPB
TSPAN18
PPT1
CD14
NGDN
NUP210
EPS15
EPB41L4A
C11orf68
AP3B1
DTD2
TXNRD2
TCAM1P
RPF2
JSRP1
DNTTIP1
ZNF263
HSPH1
DMAP1
ELK3
GALNT2
AARS1
STK16
PIEZO2
CADM4
S100A10
SLC35D2
TEDC1
SLC35A3
COG7
RRAD
TP53INP1
APLN
PSENEN
CTSO
PTGER4
AMMECR1
PDIA5
USO1
STXBP3
HDGFL3
NFRKB
SNAP47
ARF4
CREB1
EWSR1
SPTBN1
TMEM47
ARF3
VPS37A
MRPL9
NMB
UBXN4
E4F1
XRCC1
ARRB2
PHLDA3
IRGQ
MMP16
HMGN3
DNAL1
PDCD6
TMEM260
ZNF362
CEMIP
SOX12
CDC45
PIGT
RMND5B
DCP1B
VPS33A
TMEFF1
HOMER1
DDX60
GRB10
RPS19
RFC3
PTGR2
MTFMT
BHLHB9
JMJD4
MGLL
MED16
HBA2
INAFM2
CEP68
ALDH9A1
NUDT15
ERV3-1
EVI5
KANSL1L
LIMS3
CSNK2A2
FTH1P3
IRF3
NADSYN1
MAT2B
KRT7
ABHD2
MPP5
ZWINT
CLIC3
BOK
SH3BGRL
MYO18A
FUNDC2
DLG1
MMP24
HSPA6
ADCY6
NME7
TMOD2
PDLIM7
TRIM22
ROCK2
MFSD2A
MKRN1
ALYREF
UBE2J1
CSK
OSTC
PARPBP
FOXRED2
LMBRD1
TRMT1
RAD23A
SLC66A1
FOSL2
ORC6
RAP1B
TMSB4XP4
TRIM26
ABCD1
TMEM203
ZFYVE28
NACAD
EDN1
RPL41
N4BP2
MFSD5
NDUFA10
PPP1R12B
TRIM5
RNF34
NDRG1
RNF31
PANK4
PCMTD1
MGAT4B
SMUG1
HNRNPLL
IL6R
EPS8L1
EI24
GMNN
AP1AR
PLXNA2
UBE2I
ZBTB42
JDP2
NUF2
MTX2
POLE4
ZNF268
ZNF75D
SLC39A6
ELOVL4
UFL1
LSM4
MCTP1
MRPL45
MIA3
SF3A2
BTN2A3P
TECR
IFI30
RPS10
SNRNP70
CD59
STX4
AP2A1
ITPKA
SKIV2L
NMT1
CTPS2
ARMCX2
HLTF
CNN2
RPL30
CXCL16
JPT1
LRSAM1
SMC6
OR2L2
TPM3
DEXI
CHST1
BAX
TRA2B
SIPA1
STN1
IL21R
HTR1B
CBSL
KIF4A
SLC27A4
CPPED1
KRT8P36
UGT8
CUL7
HSP90AB1
NUCB1
PET100
GIMAP6
B9D1
ERCC2
VPS4B
RAC2
POMT1
TIMMDC1
SCAMP4
KLHL5
AJUBA
CSTB
YTHDC1
PITRM1
SETD7
SLC39A9
PLCXD1
DBI
PTGFRN
SCAF4
MIRLET7A1HG
NR3C1
XPC
CLIC1
CYP2U1
TPRKB
NCKAP1
RASGRF2
SRSF11
PYURF
PCGF1
DCBLD1
GNG5
SNHG21
ASPH
PIK3C2B
PTCD2
ARRDC1
SLC6A6
C12orf10
PLCL1
PLP2
PARP15
SMARCD3
RBM18
ARHGEF28
FDFT1
RPS9
GUSB
MTERF1
TIAM1
RIOK1
CREB3
TIPRL
SNHG29
KLF9
H1-0
NLN
LINC02245
ARPC2
WDR37
EEF1B2
GZF1
LMLN
STAU2
TST
IRAK1
ECI2
BLVRB
DNAJB1
RPL35
ZSWIM9
ZRANB2
SBF2
GGA3
ORC1
MIR99AHG
ZFAT
NECTIN3
TMEM116
MPI
DDHD1
FZD8
MAPK7
CAND1
FAM81A
USP46
SLC30A1
LYAR
POLM
RPL18
SNX17
CNTN3
TBCEL
SCYL1
LSM10
EVA1C
DDIT4
NUP133
ZNF322
PAGR1
CHN1
NEFH
RAMP2
NIP7
HERC3
SHROOM3
DENND3
ABCD4
ACOT13
HNRNPUL1
YAF2
NABP2
DST
STARD4
BNIP3
POLR3GL
HECTD3
FKBP1A
FOXC2
ANTXR1
GLB1L2
PEX10
CHCHD3
SLC25A46
FANCF
KPNA2
LSM7
SYNJ2
HMOX1
NIPSNAP3A
RASL10B
CAVIN2
EXOSC8
TUT7
CRIP1
MAGED2
TNKS2
HNRNPUL2
ARL1
TRIM16
NCSTN
SAFB2
RND1
PTPN4
ULBP2
SLC27A2
MED23
IRF1
COG5
GALNT10
C4orf3
CPT2
ARFGAP1
PRPF8
GRPEL1
APAF1
FAM114A1
RAB12
PCDH1
RPL32
MIR137HG
TEKT4P2
SF3B6
COMMD6
SNX4
RAB3GAP2
ESS2
FADS1
SIN3B
NIPSNAP1
GNAL
RAB14
ZNF836
C6orf62
GAS6
RALA
NEAT1
FHL3
CORO7-PAM16
PIK3CB
GAA
HJURP
DNAJB4
FERMT1
WBP1L
MTURN
FBH1
SLC35A1
H2BC19P
ZNF48
IFNAR2
PLA2G12A
HMGCL
NFATC4
UXT
TECPR1
PMM1
CHMP7
NUDT22
OAZ1
EXOC2
COPS3
HSP90AA1
BCAM
HRAS
RPS6KA4
TRAM2
AKT3
PDE1C
HSPA2
SCML1
PDE3A
CREB3L2
NCEH1
ZNF777
NSMCE4A
TSNAX
ZNF560
NAGPA
KIAA1109
SEH1L
BRD7
SPART
C5AR1
PTPRJ
ZMYM3
CIART
TMEM201
GGH
CCDC85B
METTL21A
EXOC1
NDUFA12
DMC1
U2AF1L4
IPPK
TUT4
AP2M1
GINS4
TACC3
MCL1
ZNF468
RBPMS
CASP17P
EPGN
MLLT3
BSDC1
HRK
JRKL
CETN2
HOMER2
LPXN
DDIAS
SLC52A2
DVL3
ZNF200
FHOD1
WSB2
C11orf98
SLC45A3
MOSPD3
EXOSC10
TMEM200A
NAAA
FRMPD1
RN7SL134P
TBCCD1
PDE8A
E2F1
RPLP2
GOLGA5
NAA15
ATP6V0E1
CUL3
SIL1
POLD1
XRCC6
CS
MAPK14
LAMP3
BUD23
RPL23AP42
TOX
EVI5L
BTG2
GTF3C5
HSPA7
SMIM10L1
MMS19
DRG2
TJP2
RAD51AP1
RPS6
UBE4B
TMEM167B
GNL2
TMEM158
APPL2
TENT4B
ACTR3B
SPCS1
ST20-AS1
CCT2
