# Supplementary material for: An organ-on-chip model of pulmonary arterial hypertension identifies a BMPR2-SOX17-prostacyclin signalling axis
Source: Commun Biol. 2022 Nov 7;5:1192. doi: 10.1038/s42003-022-04169-z (PMC9640600; doi:10.1038/s42003-022-04169-z)
Supplement: Supplementary file 10 — Supplementary Data 7 [file 42003_2022_4169_MOESM10_ESM.xlsx]

## Sheet: ECFC - BMPR2 mutants Normox.
SYMBOL	ENTREZID	GENENAME	logFC	PValue
A1BG	1	alpha-1-B glycoprotein	0.61152	0.0431653
AADACP1	201651	arylacetamide deacetylase pseudogene 1	-1.18619	0.0272584
AARS1	16	alanyl-tRNA synthetase 1	0.279916	0.00711863
ABCA3	21	ATP binding cassette subfamily A member 3	0.643134	0.00396811
ABCB1	5243	ATP binding cassette subfamily B member 1	1.46406	0.0126169
ABCC10	89845	ATP binding cassette subfamily C member 10	-0.507411	0.00635509
ABCC4	10257	ATP binding cassette subfamily C member 4	0.43431	0.0241601
ABCC9	10060	ATP binding cassette subfamily C member 9	-1.13128	0.00168501
ABI3	51225	ABI family member 3	0.254736	0.0468499
ABLIM3	22885	actin binding LIM protein family member 3	0.38478	0.00129927
ABTB2	25841	ankyrin repeat and BTB domain containing 2	-0.642594	0.0100234
ACADS	35	acyl-CoA dehydrogenase short chain	0.45654	0.0456218
ACER2	340485	alkaline ceramidase 2	0.500776	0.0284957
ACOX3	8310	acyl-CoA oxidase 3, pristanoyl	0.26772	0.0495801
ACP5	54	acid phosphatase 5, tartrate resistant	1.35122	0.000324732
ACSF3	197322	acyl-CoA synthetase family member 3	0.32476	0.0288038
ACTR6	64431	actin related protein 6	-0.328248	0.0342309
ADAM19	8728	ADAM metallopeptidase domain 19	0.668416	0.0273591
ADAMTS1	9510	ADAM metallopeptidase with thrombospondin type 1 motif 1	0.671259	0.000269975
ADAMTS12	81792	ADAM metallopeptidase with thrombospondin type 1 motif 12	2.52071	0.0194449
ADGRE5	976	adhesion G protein-coupled receptor E5	0.660594	0.00842912
ADGRG6	57211	adhesion G protein-coupled receptor G6	0.641418	0.0219559
ADIRF	10974	adipogenesis regulatory factor	0.714567	0.00705046
AEN	64782	apoptosis enhancing nuclease	0.337696	0.00481998
AFDN	4301	afadin, adherens junction formation factor	0.263806	0.042989
AFTPH	54812	aftiphilin	0.278278	0.020934
AGBL5	60509	ATP/GTP binding protein like 5	0.301455	0.0145095
AGFG2	3268	ArfGAP with FG repeats 2	0.3175	0.0460114
AGMO	392636	alkylglycerol monooxygenase	-1.53392	0.0366199
AHCY	191	adenosylhomocysteinase	0.261296	0.00689499
AHNAK2	113146	AHNAK nucleoprotein 2	0.314233	0.0222053
AIG1	51390	androgen induced 1	0.48449	0.00281129
ALDH1A2	8854	aldehyde dehydrogenase 1 family member A2	0.990682	0.00590213
ALDH3A2	224	aldehyde dehydrogenase 3 family member A2	0.527171	0.000441229
ALDH4A1	8659	aldehyde dehydrogenase 4 family member A1	0.341808	0.0465429
ALDH9A1	223	aldehyde dehydrogenase 9 family member A1	0.286117	0.00705945
ALPK1	80216	alpha kinase 1	0.481006	0.0277918
ALX1	8092	ALX homeobox 1	-2.07224	0.00213609
AMDHD2	51005	amidohydrolase domain containing 2	0.435869	0.00806217
AMFR	267	autocrine motility factor receptor	0.298193	0.000851284
AMOT	154796	angiomotin	-1.40487	0.0304322
ANKRD12	23253	ankyrin repeat domain 12	0.573926	0.0361802
ANKRD26	22852	ankyrin repeat domain 26	0.454173	0.00789839
ANKRD33B	651746	ankyrin repeat domain 33B	0.595344	0.0139618
ANKRD55	79722	ankyrin repeat domain 55	0.820225	0.000267602
ANKS6	203286	ankyrin repeat and sterile alpha motif domain containing 6	0.378731	0.0488438
ANO10	55129	anoctamin 10	0.306079	0.0137938
ANO2	57101	anoctamin 2	-0.946237	0.0340364
ANP32B	10541	acidic nuclear phosphoprotein 32 family member B	0.354139	0.000834325
ANP32E	81611	acidic nuclear phosphoprotein 32 family member E	0.31885	0.0122196
ANPEP	290	alanyl aminopeptidase, membrane	0.281454	0.0183067
ANXA11	311	annexin A11	0.317539	0.0177517
AP2A1	160	adaptor related protein complex 2 subunit alpha 1	0.268529	0.00164791
AP3D1	8943	adaptor related protein complex 3 subunit delta 1	0.409383	0.000289814
AP3M2	10947	adaptor related protein complex 3 subunit mu 2	0.338966	0.00847033
APLN	8862	apelin	0.464777	0.0289402
APOBEC3C	27350	apolipoprotein B mRNA editing enzyme catalytic subunit 3C	0.853921	0.000321095
APOBEC3G	60489	apolipoprotein B mRNA editing enzyme catalytic subunit 3G	0.758867	0.0148374
APOL1	8542	apolipoprotein L1	0.693303	0.0425701
APOL2	23780	apolipoprotein L2	0.352527	0.0101656
APOL3	80833	apolipoprotein L3	0.628804	0.0254101
APOL6	80830	apolipoprotein L6	0.427027	0.0239818
ARAP1	116985	ArfGAP with RhoGAP domain, ankyrin repeat and PH domain 1	0.317464	0.006358
ARHGAP10	79658	Rho GTPase activating protein 10	0.390749	0.0200738
ARHGAP12	94134	Rho GTPase activating protein 12	0.260288	0.0228852
ARHGAP20	57569	Rho GTPase activating protein 20	0.695735	0.00240655
ARHGAP23	57636	Rho GTPase activating protein 23	0.471749	0.00532263
ARHGAP25	9938	Rho GTPase activating protein 25	0.865563	0.0111235
ARHGAP28	79822	Rho GTPase activating protein 28	-0.596875	0.0468532
ARHGAP6	395	Rho GTPase activating protein 6	0.501883	0.041325
ARHGEF17	9828	Rho guanine nucleotide exchange factor 17	0.584339	0.00807258
ARL4C	10123	ADP ribosylation factor like GTPase 4C	0.798116	0.00100471
ARL4D	379	ADP ribosylation factor like GTPase 4D	0.774188	0.00469039
ARL6	84100	ADP ribosylation factor like GTPase 6	-0.426856	0.0325964
ARMC5	79798	armadillo repeat containing 5	0.293534	0.00394506
ARNTL2	56938	aryl hydrocarbon receptor nuclear translocator like 2	0.334232	0.0104795
ASAH1	427	N-acylsphingosine amidohydrolase 1	0.404742	0.0375568
ASB3	51130	ankyrin repeat and SOCS box containing 3	-0.405525	0.00518275
ASB8	140461	ankyrin repeat and SOCS box containing 8	0.334151	0.011535
ASCC3	10973	activating signal cointegrator 1 complex subunit 3	0.2961	0.0386026
ASS1	445	argininosuccinate synthase 1	0.717419	0.0103777
ATIC	471	5-aminoimidazole-4-carboxamide ribonucleotide formyltransferase/IMP cyclohydrolase	0.391968	0.0116442
ATL1	51062	atlastin GTPase 1	-0.663733	0.022463
ATP13A2	23400	ATPase cation transporting 13A2	0.352582	0.0182405
ATP9B	374868	ATPase phospholipid transporting 9B (putative)	-0.632486	0.00269397
ATRX	546	ATRX chromatin remodeler	0.386959	0.0459089
AVEN	57099	apoptosis and caspase activation inhibitor	0.267724	0.00556165
AXL	558	AXL receptor tyrosine kinase	0.629021	0.000829951
B3GNT9	84752	UDP-GlcNAc:betaGal beta-1,3-N-acetylglucosaminyltransferase 9	0.559843	0.0329875
BAG2	9532	BCL2 associated athanogene 2	0.553123	0.0288098
BCAM	4059	basal cell adhesion molecule (Lutheran blood group)	0.506029	0.0160086
BCAR1	9564	BCAR1 scaffold protein, Cas family member	0.317461	0.00843032
BCL2	596	BCL2 apoptosis regulator	-0.872329	0.0125612
BCL2L1	598	BCL2 like 1	0.261456	0.0165567
BCOR	54880	BCL6 corepressor	0.485604	0.00107876
BIN1	274	bridging integrator 1	0.368711	0.0212059
BLOC1S6	26258	biogenesis of lysosomal organelles complex 1 subunit 6	-0.261504	0.0483665
BMPR2	659	bone morphogenetic protein receptor type 2	-0.494965	0.00594669
BOP1	23246	BOP1 ribosomal biogenesis factor	0.367039	0.000709271
BORCS5	118426	BLOC-1 related complex subunit 5	0.465711	0.0204485
BRD9	65980	bromodomain containing 9	0.281167	0.00112548
BTN3A2	11118	butyrophilin subfamily 3 member A2	0.58119	0.0237264
C12orf50	160419	chromosome 12 open reading frame 50	-1.09522	0.00419678
C16orf74	404550	chromosome 16 open reading frame 74	0.398285	0.0408953
C17orf58	284018	chromosome 17 open reading frame 58	0.55364	0.0415474
C19orf48	84798	chromosome 19 open reading frame 48	0.285572	0.0149706
C1orf198	84886	chromosome 1 open reading frame 198	0.337548	0.0105563
C1orf54	79630	chromosome 1 open reading frame 54	-0.768802	0.0120259
C1QTNF6	114904	C1q and TNF related 6	-0.42127	0.0429248
C1RL	51279	complement C1r subcomponent like	0.344169	0.0133302
C20orf204	284739	chromosome 20 open reading frame 204	0.766475	0.0329932
C20orf27	54976	chromosome 20 open reading frame 27	0.257156	0.0237543
C2CD2	25966	C2 calcium dependent domain containing 2	0.656941	0.00940813
C3orf70	285382	chromosome 3 open reading frame 70	0.981993	0.0430447
C6orf141	135398	chromosome 6 open reading frame 141	-0.483458	0.0360003
C7orf50	84310	chromosome 7 open reading frame 50	0.255309	0.0416022
CA12	771	carbonic anhydrase 12	1.3605	0.0100289
CADPS2	93664	calcium dependent secretion activator 2	0.390797	0.0465684
CALM3	808	calmodulin 3	0.269205	0.00251754
CALML4	91860	calmodulin like 4	0.74505	0.0151848
CAMK1	8536	calcium/calmodulin dependent protein kinase I	0.382946	0.014776
CAMKK1	84254	calcium/calmodulin dependent protein kinase kinase 1	0.492412	0.0157513
CARD10	29775	caspase recruitment domain family member 10	0.352307	0.0249793
CARD16	114769	caspase recruitment domain family member 16	0.496965	0.0402364
CAV1	857	caveolin 1	0.387293	0.00235202
CAVIN1	284119	caveolae associated protein 1	0.423036	0.000132689
CAVIN2	8436	caveolae associated protein 2	0.824136	0.00165136
CBR3	874	carbonyl reductase 3	0.614787	0.0118018
CBWD1	55871	COBW domain containing 1	0.48507	0.00710563
CBWD3	445571	COBW domain containing 3	-0.639174	0.00594337
CBX6	23466	chromobox 6	0.494949	0.000459411
CC2D1A	54862	coiled-coil and C2 domain containing 1A	0.28607	0.00996574
CCAR1	55749	cell division cycle and apoptosis regulator 1	0.335522	0.0452214
CCDC188	388849	coiled-coil domain containing 188	0.606196	0.0180002
CCDC22	28952	coiled-coil domain containing 22	0.284092	0.0188458
CCDC24	149473	coiled-coil domain containing 24	-0.656608	0.0284714
CCDC25	55246	coiled-coil domain containing 25	0.294871	0.00325241
CCDC66	285331	coiled-coil domain containing 66	-0.395653	0.0431492
CCDC69	26112	coiled-coil domain containing 69	0.555238	0.00485145
CCDC91	55297	coiled-coil domain containing 91	0.331209	0.0229036
CCNF	899	cyclin F	0.371037	0.0115845
CCNG1	900	cyclin G1	0.338056	0.00552228
CCT6A	908	chaperonin containing TCP1 subunit 6A	0.287034	0.0012416
CD14	929	CD14 molecule	-0.852467	0.0475075
CD24	100133941	CD24 molecule	-0.870076	0.0316915
CD47	961	CD47 molecule	0.428012	0.00227091
CD99L2	83692	CD99 molecule like 2	0.298934	0.0132104
CDC25A	993	cell division cycle 25A	0.477685	0.0148557
CDC25B	994	cell division cycle 25B	0.727403	0.00359747
CDCA5	113130	cell division cycle associated 5	0.531273	0.0223424
CDKN2C	1031	cyclin dependent kinase inhibitor 2C	0.598023	0.0213887
CEBPB	1051	CCAAT enhancer binding protein beta	0.483352	0.0403866
CEMIP2	23670	cell migration inducing hyaluronidase 2	0.292225	0.0145361
CENPQ	55166	centromere protein Q	-0.546587	0.0237057
CENPV	201161	centromere protein V	0.51428	0.0158239
CEP131	22994	centrosomal protein 131	0.443767	0.00455727
CETP	1071	cholesteryl ester transfer protein	0.445082	0.0235088
CFAP54	144535	cilia and flagella associated protein 54	-0.80964	0.000448368
CGNL1	84952	cingulin like 1	1.21433	0.0174785
CHD1L	9557	chromodomain helicase DNA binding protein 1 like	0.322796	0.00322822
CHD4	1108	chromodomain helicase DNA binding protein 4	0.375611	0.000727902
CHEK2	11200	checkpoint kinase 2	-0.455277	0.0110788
CHERP	10523	calcium homeostasis endoplasmic reticulum protein	0.253579	0.0367498
CHIC2	26511	cysteine rich hydrophobic domain 2	0.261132	0.0153576
CHP1	11261	calcineurin like EF-hand protein 1	0.552696	0.0017204
CHSY3	337876	chondroitin sulfate synthase 3	-1.02935	0.000937056
CHTF8	54921	chromosome transmission fidelity factor 8	0.368657	0.000168742
CINP	51550	cyclin dependent kinase 2 interacting protein	0.25048	0.0244745
CIZ1	25792	CDKN1A interacting zinc finger protein 1	0.277016	0.0157888
CLDN11	5010	claudin 11	0.586656	0.00207927
CLEC3B	7123	C-type lectin domain family 3 member B	1.0928	0.0176831
CLNS1A	1207	chloride nucleotide-sensitive channel 1A	0.255826	0.0258849
CNP	1267	2',3'-cyclic nucleotide 3' phosphodiesterase	0.431459	8.63988e-05
CNTROB	116840	centrobin, centriole duplication and spindle assembly protein	0.32413	0.0427774
COL12A1	1303	collagen type XII alpha 1 chain	3.2593	0.000409572
COL13A1	1305	collagen type XIII alpha 1 chain	0.68039	0.000610929
COL18A1	80781	collagen type XVIII alpha 1 chain	0.407606	0.0204814
COL4A6	1288	collagen type IV alpha 6 chain	1.28549	0.00409546
COL6A1	1291	collagen type VI alpha 1 chain	0.932125	0.0350553
COL6A2	1292	collagen type VI alpha 2 chain	2.61735	0.00510148
COLEC12	81035	collectin subfamily member 12	0.945958	0.0197987
COPG2	26958	coatomer protein complex subunit gamma 2	0.402164	0.00759511
COQ8A	56997	coenzyme Q8A	0.397398	0.0208563
CORO1C	23603	coronin 1C	0.306495	0.0136608
COTL1	23406	coactosin like F-actin binding protein 1	0.275961	0.00644838
COX15	1355	cytochrome c oxidase assembly homolog COX15	0.258433	0.0173532
CPT1A	1374	carnitine palmitoyltransferase 1A	0.413653	0.0243784
CRACR2B	283229	calcium release activated channel regulator 2B	0.763175	0.00578683
CRAT	1384	carnitine O-acetyltransferase	0.293776	0.00941297
CREB5	9586	cAMP responsive element binding protein 5	-1.09308	0.0216134
CRLF1	9244	cytokine receptor like factor 1	2.31201	0.0207206
CRTAC1	55118	cartilage acidic protein 1	1.58395	0.000382529
CRYBB2P1	1416	crystallin beta B2 pseudogene 1	-0.824515	0.0110397
CSF1	1435	colony stimulating factor 1	0.618518	0.0324125
CSNK1A1	1452	casein kinase 1 alpha 1	0.272052	0.00770186
CSNK2A2	1459	casein kinase 2 alpha 2	0.265981	0.00423295
CTDSPL	10217	CTD small phosphatase like	0.40504	0.0409496
CTSB	1508	cathepsin B	-0.410064	0.0065203
CTSK	1513	cathepsin K	1.75357	0.00262878
CTSS	1520	cathepsin S	-0.833293	0.0409498
CTU1	90353	cytosolic thiouridylase subunit 1	0.343655	0.0251357
CTU2	348180	cytosolic thiouridylase subunit 2	0.29766	0.0101255
CUL4B	8450	cullin 4B	0.337811	0.0014124
CWF19L2	143884	CWF19 like cell cycle control factor 2	0.403487	0.00445616
CXCL1	2919	C-X-C motif chemokine ligand 1	1.3145	0.00184903
CXCL11	6373	C-X-C motif chemokine ligand 11	-1.89267	0.00315945
CXCR4	7852	C-X-C motif chemokine receptor 4	-1.01524	0.000114178
CYBA	1535	cytochrome b-245 alpha chain	0.794238	0.00129617
CYP51A1	1595	cytochrome P450 family 51 subfamily A member 1	0.31778	0.00939315
DAPK1	1612	death associated protein kinase 1	0.424227	0.00353469
DAPK2	23604	death associated protein kinase 2	-0.72631	0.0189474
DCAF4	26094	DDB1 and CUL4 associated factor 4	0.366959	0.0227793
DCAF8	50717	DDB1 and CUL4 associated factor 8	0.286257	0.0366752
DCUN1D4	23142	defective in cullin neddylation 1 domain containing 4	0.280317	0.0377497
DDAH1	23576	dimethylarginine dimethylaminohydrolase 1	0.464328	0.00282011
DDR2	4921	discoidin domain receptor tyrosine kinase 2	1.15472	0.00283344
DDX49	54555	DEAD-box helicase 49	0.259656	0.00553348
DDX54	79039	DEAD-box helicase 54	0.409098	0.0177449
DEAF1	10522	DEAF1 transcription factor	0.346235	0.0111603
DENND1A	57706	DENN domain containing 1A	0.418515	0.0174078
DGKZ	8525	diacylglycerol kinase zeta	0.414583	0.0189917
DHCR24	1718	24-dehydrocholesterol reductase	0.659104	0.00462339
DHRS3	9249	dehydrogenase/reductase 3	0.864043	0.00518562
DIAPH1	1729	diaphanous related formin 1	0.279799	0.00445185
DIPK1B	138311	divergent protein kinase domain 1B	0.319362	0.0227719
DKK2	27123	dickkopf WNT signaling pathway inhibitor 2	2.79017	0.0192107
DMAC1	90871	distal membrane arm assembly complex 1	0.340826	0.0236817
DMAP1	55929	DNA methyltransferase 1 associated protein 1	0.39317	0.0017775
DNAAF4	161582	dynein axonemal assembly factor 4	-0.349498	0.0171955
DNAJB12	54788	DnaJ heat shock protein family (Hsp40) member B12	0.262313	0.00797734
DNAJB4	11080	DnaJ heat shock protein family (Hsp40) member B4	0.357372	0.0185427
DNAJB5	25822	DnaJ heat shock protein family (Hsp40) member B5	0.282041	0.0489281
DNASE1L3	1776	deoxyribonuclease 1 like 3	1.28054	0.0231601
DNM3OS	100628315	DNM3 opposite strand/antisense RNA	0.836018	0.0223401
DOK3	79930	docking protein 3	0.817998	0.0139826
DOK5	55816	docking protein 5	1.41566	0.00882548
DPP4	1803	dipeptidyl peptidase 4	1.47653	0.00705143
DPYSL3	1809	dihydropyrimidinase like 3	-0.328186	0.012558
DROSHA	29102	drosha ribonuclease III	0.385004	0.0483239
DSN1	79980	DSN1 component of MIS12 kinetochore complex	0.276298	0.0398472
DTL	51514	denticleless E3 ubiquitin protein ligase homolog	0.543559	0.0330663
DTNA	1837	dystrobrevin alpha	-0.950004	0.042458
DUSP7	1849	dual specificity phosphatase 7	0.367357	0.00540417
DUXAP8	503637	double homeobox A pseudogene 8	-1.58716	0.0218889
DYM	54808	dymeclin	0.27247	0.0452415
DYSF	8291	dysferlin	0.434963	0.045582
EBP	10682	EBP cholestenol delta-isomerase	0.345356	0.0103782
ECHDC2	55268	enoyl-CoA hydratase domain containing 2	0.455486	0.00530262
ECHDC3	79746	enoyl-CoA hydratase domain containing 3	1.3482	0.0289739
ECI2	10455	enoyl-CoA delta isomerase 2	0.29224	0.00918973
ECSIT	51295	ECSIT signaling integrator	0.336497	0.00941514
EDA2R	60401	ectodysplasin A2 receptor	0.723263	0.00517673
EDIL3	10085	EGF like repeats and discoidin domains 3	-1.30662	0.00415739
EEA1	8411	early endosome antigen 1	0.370328	0.0444612
EEF1AKMT3	25895	EEF1A lysine methyltransferase 3	0.290176	0.049586
EEF2	1938	eukaryotic translation elongation factor 2	0.303431	0.0255793
EFNB1	1947	ephrin B1	0.573934	0.019567
EFNB3	1949	ephrin B3	-0.610618	0.0258068
EGFL7	51162	EGF like domain multiple 7	0.307945	0.032577
EGFR	1956	epidermal growth factor receptor	0.64215	0.00637495
EHBP1	23301	EH domain binding protein 1	0.377281	0.0189608
EHBP1L1	254102	EH domain binding protein 1 like 1	0.516488	0.00792267
EHD1	10938	EH domain containing 1	0.295606	0.000233605
EIF1B-AS1	440952	EIF1B antisense RNA 1	-1.04963	0.0010619
EIF2B4	8890	eukaryotic translation initiation factor 2B subunit delta	0.25172	0.0367296
EIF3C	8663	eukaryotic translation initiation factor 3 subunit C	0.35566	0.0144438
EIF4G1	1981	eukaryotic translation initiation factor 4 gamma 1	0.267762	0.00327097
EIF5B	9669	eukaryotic translation initiation factor 5B	0.392293	0.00430577
ELOF1	84337	elongation factor 1 homolog	0.297018	0.0184293
ELP1	8518	elongator complex protein 1	0.27734	0.0271809
ELP2	55250	elongator acetyltransferase complex subunit 2	0.287123	0.00691684
ENKUR	219670	enkurin, TRPC channel interacting protein	-0.578961	0.0360202
ENTPD6	955	ectonucleoside triphosphate diphosphohydrolase 6	0.434257	0.00733273
EPB41	2035	erythrocyte membrane protein band 4.1	-0.369707	0.00356988
EPHB1	2047	EPH receptor B1	-0.948905	0.001909
EPHB2	2048	EPH receptor B2	0.391102	0.033863
EPHB4	2050	EPH receptor B4	0.343161	0.022662
EPHX1	2052	epoxide hydrolase 1	0.267587	0.0499799
EPM2A	7957	EPM2A glucan phosphatase, laforin	-0.449039	0.0251486
EPRS1	2058	glutamyl-prolyl-tRNA synthetase 1	0.314092	0.00282465
EPS15L1	58513	epidermal growth factor receptor pathway substrate 15 like 1	0.254971	0.0238598
ERBB2	2064	erb-b2 receptor tyrosine kinase 2	-1.16296	0.0180127
ERCC1	2067	ERCC excision repair 1, endonuclease non-catalytic subunit	0.35794	0.00183929
ERCC2	2068	ERCC excision repair 2, TFIIH core complex helicase subunit	0.464785	0.000257816
ERGIC1	57222	endoplasmic reticulum-golgi intermediate compartment 1	0.29788	0.00480431
ERVK13-1	100507321	endogenous retrovirus group K13 member 1	-0.741089	0.012653
ESF1	51575	ESF1 nucleolar pre-rRNA processing protein homolog	0.359679	0.0208294
ESM1	11082	endothelial cell specific molecule 1	-0.667356	0.00129327
ETFBKMT	254013	electron transfer flavoprotein subunit beta lysine methyltransferase	-0.427503	0.0291252
ETS2	2114	ETS proto-oncogene 2, transcription factor	0.642445	2.98116e-05
EVA1A	84141	eva-1 homolog A, regulator of programmed cell death	-0.747168	0.0190825
EVI5L	115704	ecotropic viral integration site 5 like	0.342188	0.0186129
EXOC3	11336	exocyst complex component 3	0.267607	0.00530868
EXOC4	60412	exocyst complex component 4	0.320915	0.0147132
EXOC6B	23233	exocyst complex component 6B	0.391699	0.0323115
EXOSC4	54512	exosome component 4	0.258764	0.0431472
EZR	7430	ezrin	0.402629	0.00199247
F2RL1	2150	F2R like trypsin receptor 1	-0.662387	0.0244999
F2RL3	9002	F2R like thrombin or trypsin receptor 3	-0.367315	0.0414521
FADS2	9415	fatty acid desaturase 2	0.402201	0.0134735
FAH	2184	fumarylacetoacetate hydrolase	0.439729	0.00526918
FAM110B	90362	family with sequence similarity 110 member B	-1.63715	0.0113458
FAM111A	63901	family with sequence similarity 111 member A	0.702143	0.0160627
FAM131A	131408	family with sequence similarity 131 member A	0.29112	0.0401239
FAM174B	400451	family with sequence similarity 174 member B	0.730075	0.0369206
FAM189B	10712	family with sequence similarity 189 member B	0.30287	0.00129359
FAM207A	85395	family with sequence similarity 207 member A	0.272771	0.0109742
FAM53B	9679	family with sequence similarity 53 member B	0.443784	0.00341619
FAM83G	644815	family with sequence similarity 83 member G	0.456857	0.00424303
FARS2	10667	phenylalanyl-tRNA synthetase 2, mitochondrial	0.297785	0.00864242
FBLN2	2199	fibulin 2	1.125	0.0376302
FBLN7	129804	fibulin 7	0.665158	0.0108553
FBN2	2201	fibrillin 2	-5.08281	4.16462e-05
FBXL19	54620	F-box and leucine rich repeat protein 19	0.292128	0.0349294
FBXO2	26232	F-box protein 2	0.96179	0.00746779
FBXO44	93611	F-box protein 44	0.433173	0.0205118
FBXW7	55294	F-box and WD repeat domain containing 7	0.345191	0.00863712
FCHO1	23149	FCH and mu domain containing endocytic adaptor 1	0.681461	0.0135177
FCSK	197258	fucose kinase	0.335727	0.0439005
FDFT1	2222	farnesyl-diphosphate farnesyltransferase 1	0.335839	0.0044315
FDXR	2232	ferredoxin reductase	0.405605	0.0232002
FEN1	2237	flap structure-specific endonuclease 1	0.347546	0.0340405
FGD5	152273	FYVE, RhoGEF and PH domain containing 5	0.352601	0.0120371
FGD6	55785	FYVE, RhoGEF and PH domain containing 6	0.500821	0.00466182
FGF2	2247	fibroblast growth factor 2	0.77796	0.00310726
FGFR3	2261	fibroblast growth factor receptor 3	-1.07475	0.0189099
FGGY	55277	FGGY carbohydrate kinase domain containing	0.293711	0.0384802
FHL1	2273	four and a half LIM domains 1	0.465945	0.00266348
FKBP10	60681	FKBP prolyl isomerase 10	0.298806	0.0128575
FKBP11	51303	FKBP prolyl isomerase 11	0.337205	0.0158157
FLI1	2313	Fli-1 proto-oncogene, ETS transcription factor	0.484047	6.22632e-05
FLII	2314	FLII actin remodeling protein	0.350613	0.030988
FLNA	2316	filamin A	0.296479	0.0302781
FLNC	2318	filamin C	0.36264	0.0174064
FLOT2	2319	flotillin 2	0.295871	0.0232834
FLYWCH1	84256	FLYWCH-type zinc finger 1	0.307867	0.0143247
FMNL2	114793	formin like 2	0.261579	0.0153359
FNDC4	64838	fibronectin type III domain containing 4	0.320425	0.0118526
FOXF1	2294	forkhead box F1	1.58531	0.0104703
FOXP1	27086	forkhead box P1	0.340014	0.0433016
FOXRED1	55572	FAD dependent oxidoreductase domain containing 1	-0.44096	0.00779375
FRMD4A	55691	FERM domain containing 4A	0.323963	0.0303096
FSIP2	401024	fibrous sheath interacting protein 2	-1.25394	0.00388792
FST	10468	follistatin	1.62712	0.031386
FTL	2512	ferritin light chain	0.295715	0.0363492
FTX	100302692	FTX transcript, XIST regulator	-0.456604	0.0178227
FUT11	170384	fucosyltransferase 11	0.253614	0.046028
FUT8	2530	fucosyltransferase 8	0.38578	0.0259187
FYCO1	79443	FYVE and coiled-coil domain containing 1	0.586419	0.00319859
FZD4	8322	frizzled class receptor 4	0.349647	0.0110245
FZD5	7855	frizzled class receptor 5	0.785102	0.0337925
G6PD	2539	glucose-6-phosphate dehydrogenase	0.335144	0.00348589
GAB1	2549	GRB2 associated binding protein 1	-0.406614	0.0333598
GABARAPL1	23710	GABA type A receptor associated protein like 1	-0.295104	0.0282179
GADL1	339896	glutamate decarboxylase like 1	-1.20224	0.00535977
GAK	2580	cyclin G associated kinase	0.260934	0.0128951
GALNT6	11226	polypeptide N-acetylgalactosaminyltransferase 6	0.519387	0.00349623
GALNT7	51809	polypeptide N-acetylgalactosaminyltransferase 7	-0.33121	0.0234617
GAPDH	2597	glyceraldehyde-3-phosphate dehydrogenase	0.255848	0.0183405
GBGT1	26301	globoside alpha-1,3-N-acetylgalactosaminyltransferase 1 (FORS blood group)	0.529551	0.00566715
GBP2	2634	guanylate binding protein 2	0.486082	0.00635052
GBX2	2637	gastrulation brain homeobox 2	-1.10581	0.0206338
GCA	25801	grancalcin	0.751288	0.0179444
GCKR	2646	glucokinase regulator	1.06188	0.00980244
GCNT2	2651	glucosaminyl (N-acetyl) transferase 2 (I blood group)	0.810689	0.00169062
GCSHP5	100329108	glycine cleavage system protein H pseudogene 5	1.15109	0.0465899
GDF7	151449	growth differentiation factor 7	0.861474	0.0425632
GEMIN4	50628	gem nuclear organelle associated protein 4	0.332901	0.00783001
GEN1	348654	GEN1 Holliday junction 5' flap endonuclease	-0.826511	0.0328393
GET4	51608	guided entry of tail-anchored proteins factor 4	0.250689	0.00913191
GFER	2671	growth factor, augmenter of liver regeneration	0.394228	0.0106752
GGT5	2687	gamma-glutamyltransferase 5	0.588695	0.0252034
GGT7	2686	gamma-glutamyltransferase 7	0.878691	0.0251989
GIT1	28964	GIT ArfGAP 1	0.335198	0.00553407
GNL3L	54552	G protein nucleolar 3 like	0.351156	0.0326225
GOLPH3L	55204	golgi phosphoprotein 3 like	0.303945	0.00630125
GPATCH3	63906	G-patch domain containing 3	0.297344	0.0187607
GPATCH4	54865	G-patch domain containing 4	0.319585	0.0189229
GPC1	2817	glypican 1	1.0883	0.00126838
GPI	2821	glucose-6-phosphate isomerase	0.251476	0.0191505
GPR173	54328	G protein-coupled receptor 173	-0.645244	0.0473613
GPR37	2861	G protein-coupled receptor 37	-2.83621	7.50932e-07
GPRC5B	51704	G protein-coupled receptor class C group 5 member B	1.20218	8.42882e-07
GPRIN3	285513	GPRIN family member 3	-1.38377	0.000116649
GPX3	2878	glutathione peroxidase 3	1.34061	5.67521e-06
GRB10	2887	growth factor receptor bound protein 10	-0.371945	0.00953646
GRB14	2888	growth factor receptor bound protein 14	0.69307	0.0402541
GRK3	157	G protein-coupled receptor kinase 3	-0.799386	0.0221091
GSDMD	79792	gasdermin D	0.705126	0.00107365
GSE1	23199	Gse1 coiled-coil protein	0.425212	0.0296267
GSTM3	2947	glutathione S-transferase mu 3	0.772601	0.00463564
GSTZ1	2954	glutathione S-transferase zeta 1	0.367768	0.0164297
GTF2F1	2962	general transcription factor IIF subunit 1	0.271621	0.00599427
GTF2IP12	101926918	general transcription factor IIi pseudogene 12	-0.731417	0.00487944
GTF2IRD1	9569	GTF2I repeat domain containing 1	0.475765	0.0112321
GTPBP6	8225	GTP binding protein 6 (putative)	0.318854	0.00289696
GULP1	51454	GULP PTB domain containing engulfment adaptor 1	-0.829089	0.0125739
HDAC7	51564	histone deacetylase 7	0.254889	0.0237226
HEBP1	50865	heme binding protein 1	0.403008	0.000882161
HELLPAR	101101692	HELLP associated long non-coding RNA	-1.23823	0.00191243
HENMT1	113802	HEN methyltransferase 1	0.59722	0.0153206
HES1	3280	hes family bHLH transcription factor 1	0.349336	0.00409121
HEXIM2	124790	HEXIM P-TEFb complex subunit 2	0.537708	0.0348249
HEY2	23493	hes related family bHLH transcription factor with YRPW motif 2	-0.457029	0.00367663
HGH1	51236	HGH1 homolog	0.270825	0.0277478
HHIPL1	84439	HHIP like 1	0.802724	0.0137332
HIC1	3090	HIC ZBTB transcriptional repressor 1	0.273232	0.0495423
HIF1A-AS3	105370526	HIF1A antisense RNA 3	-1.04328	0.00438648
HLA-E	3133	major histocompatibility complex, class I, E	0.322404	0.0213612
HLA-H	3136	major histocompatibility complex, class I, H (pseudogene)	-1.12016	0.00491743
HLA-L	3139	major histocompatibility complex, class I, L (pseudogene)	1.36973	0.00673128
HMBOX1	79618	homeobox containing 1	0.61009	0.021842
HMGA1	3159	high mobility group AT-hook 1	0.329374	0.00666185
HMGN2	3151	high mobility group nucleosomal binding domain 2	0.273811	0.00752103
HMOX1	3162	heme oxygenase 1	0.641634	0.0371136
HNRNPA1P48	642659	heterogeneous nuclear ribonucleoprotein A1 pseudogene 48	0.990897	0.00434092
HOMER1	9456	homer scaffold protein 1	-1.18447	0.00925932
HOXA11	3207	homeobox A11	-1.93469	0.0439988
HOXA11-AS	221883	HOXA11 antisense RNA	-2.32563	0.0103724
HOXB7	3217	homeobox B7	0.553665	0.00444265
HOXD1	3231	homeobox D1	0.355153	0.0318969
HSD17B14	51171	hydroxysteroid 17-beta dehydrogenase 14	0.613005	0.0243273
HSP90AA1	3320	heat shock protein 90 alpha family class A member 1	0.357652	0.0385352
HSPB6	126393	heat shock protein family B (small) member 6	1.00063	0.0298289
HSPD1	3329	heat shock protein family D (Hsp60) member 1	0.296913	0.0183102
HTR1D	3352	5-hydroxytryptamine receptor 1D	1.07001	0.000456079
ICAM2	3384	intercellular adhesion molecule 2	0.447913	0.00936021
IFI35	3430	interferon induced protein 35	0.459279	0.0409113
IFIT1	3434	interferon induced protein with tetratricopeptide repeats 1	0.975744	0.0343997
IFIT2	3433	interferon induced protein with tetratricopeptide repeats 2	0.792164	0.0473109
IFT27	11020	intraflagellar transport 27	0.262541	0.0273794
IFT57	55081	intraflagellar transport 57	0.503504	0.00184566
IGF2	3481	insulin like growth factor 2	-1.198	0.0265665
IGF2BP2	10644	insulin like growth factor 2 mRNA binding protein 2	0.283562	0.0150442
IGFBP3	3486	insulin like growth factor binding protein 3	-0.72487	0.0476583
IGFBP6	3489	insulin like growth factor binding protein 6	1.26693	0.000167317
IL17RC	84818	interleukin 17 receptor C	0.613919	0.00212875
IMP4	92856	IMP U3 small nucleolar ribonucleoprotein 4	0.452184	0.00103025
IMPDH2	3615	inosine monophosphate dehydrogenase 2	0.319556	0.0220797
INKA2	55924	inka box actin regulator 2	0.558976	0.0012452
INPP5A	3632	inositol polyphosphate-5-phosphatase A	0.31151	0.04501
INSIG1	3638	insulin induced gene 1	0.289299	0.0293606
INTS1	26173	integrator complex subunit 1	0.397173	0.00253864
IPO4	79711	importin 4	0.320832	0.00459163
IPO5	3843	importin 5	0.365524	0.00788187
IPPK	64768	inositol-pentakisphosphate 2-kinase	0.318041	0.0449135
IRF2BPL	64207	interferon regulatory factor 2 binding protein like	0.250819	0.028733
IRF6	3664	interferon regulatory factor 6	-0.849605	0.00188023
ISG20	3669	interferon stimulated exonuclease gene 20	0.906026	0.00707224
ISOC1	51015	isochorismatase domain containing 1	-0.345689	0.0219124
ISOC2	79763	isochorismatase domain containing 2	0.264541	0.0318658
ISYNA1	51477	inositol-3-phosphate synthase 1	0.566588	0.00270787
ITGA3	3675	integrin subunit alpha 3	0.338194	0.0202243
ITGB8	3696	integrin subunit beta 8	-0.665431	0.048112
ITPR3	3710	inositol 1,4,5-trisphosphate receptor type 3	0.425151	0.00116272
ITPRIP	85450	inositol 1,4,5-trisphosphate receptor interacting protein	0.255964	0.0255019
JAG1	182	jagged canonical Notch ligand 1	-0.319142	0.0300143
JARID2	3720	jumonji and AT-rich interaction domain containing 2	0.380877	0.0199277
KATNA1	11104	katanin catalytic subunit A1	0.405197	0.00103024
KAZN	23254	kazrin, periplakin interacting protein	1.02217	0.00261418
KBTBD11	9920	kelch repeat and BTB domain containing 11	1.22846	0.0133559
KCND1	3750	potassium voltage-gated channel subfamily D member 1	1.18625	0.0258153
KCNK6	9424	potassium two pore domain channel subfamily K member 6	0.499957	0.00578296
KCNMB2-AS1	104797538	KCNMB2 antisense RNA 1	-0.976917	0.0179151
KCNN4	3783	potassium calcium-activated channel subfamily N member 4	1.32603	0.0151519
KCNQ1OT1	10984	KCNQ1 opposite strand/antisense transcript 1	-0.997572	0.00237308
KCTD2	23510	potassium channel tetramerization domain containing 2	0.263989	0.026691
KDM1A	23028	lysine demethylase 1A	0.313187	0.000467536
KIAA0930	23313	KIAA0930	0.296476	0.00677547
KIAA1324L	222223	KIAA1324 like	-1.09982	0.00629893
KIAA1328	57536	KIAA1328	-0.574525	0.0198122
KIF1C	10749	kinesin family member 1C	0.301504	0.0216177
KLF2	10365	Kruppel like factor 2	0.470535	0.00332791
KLF4	9314	Kruppel like factor 4	0.54145	0.0401246
KLF9	687	Kruppel like factor 9	0.348443	0.0118916
KLHDC8B	200942	kelch domain containing 8B	0.460317	0.0247236
KLHL5	51088	kelch like family member 5	0.327489	0.00523412
KNOP1	400506	lysine rich nucleolar protein 1	0.394182	0.00121718
KPNA2	3838	karyopherin subunit alpha 2	0.271851	0.00275463
KRT18	3875	keratin 18	0.530988	0.000988167
KSR2	283455	kinase suppressor of ras 2	-1.30488	0.0337832
L3HYPDH	112849	trans-L-3-hydroxyproline dehydratase	-0.366931	0.0413076
LBH	81606	LBH regulator of WNT signaling pathway	-0.786399	0.00266305
LDLRAP1	26119	low density lipoprotein receptor adaptor protein 1	0.321269	0.00121864
LENG9	94059	leukocyte receptor cluster member 9	0.814664	0.00223305
LETM1	3954	leucine zipper and EF-hand containing transmembrane protein 1	0.346793	0.0164352
LGALS3BP	3959	galectin 3 binding protein	1.75496	0.0209949
LIMS2	55679	LIM zinc finger domain containing 2	0.468761	0.000450149
LINC00323	284835	long intergenic non-protein coding RNA 323	-0.718876	0.0287948
LINC00339	29092	long intergenic non-protein coding RNA 339	-0.472072	0.00410663
LINC00343	144920	long intergenic non-protein coding RNA 343	-1.2764	0.00159267
LINC00504	201853	long intergenic non-protein coding RNA 504	-1.01188	0.0091188
LINC00607	646324	long intergenic non-protein coding RNA 607	-0.45013	0.0275329
LINC00630	100287765	long intergenic non-protein coding RNA 630	-0.900742	0.00788389
LINC00674	100499466	long intergenic non-protein coding RNA 674	0.661533	0.045653
LINC00839	84856	long intergenic non-protein coding RNA 839	1.42169	0.0339967
LINC01006	100506380	long intergenic non-protein coding RNA 1006	0.496918	0.0273297
LINC01206	100996490	long intergenic non-protein coding RNA 1206	-1.02647	0.0449126
LINC01235	401492	long intergenic non-protein coding RNA 1235	0.685623	0.01848
LINC01278	92249	long intergenic non-protein coding RNA 1278	-0.34469	0.0292608
LINC01608	101927459	long intergenic non-protein coding RNA 1608	-1.40082	0.00171942
LINC01615	101929484	long intergenic non-protein coding RNA 1615	1.76329	0.00353177
LINC01814	101929567	long intergenic non-protein coding RNA 1814	-0.825986	0.0339551
LINC02503	105377349	long intergenic non-protein coding RNA 2503	-0.956946	0.00956085
LINC02802	100996732	long intergenic non-protein coding RNA 2802	0.890193	0.0107751
LIPG	9388	lipase G, endothelial type	-0.623506	0.000325267
LLGL1	3996	LLGL scribble cell polarity complex component 1	0.257876	0.0239234
LMNA	4000	lamin A/C	0.402873	4.73564e-05
LOXL1	4016	lysyl oxidase like 1	1.10645	0.0119536
LOXL1-AS1	100287616	LOXL1 antisense RNA 1	0.642027	0.0490145
LPCAT1	79888	lysophosphatidylcholine acyltransferase 1	0.286472	0.0109696
LPIN1	23175	lipin 1	0.308157	0.00786769
LRFN4	78999	leucine rich repeat and fibronectin type III domain containing 4	0.28153	0.00635962
LRP3	4037	LDL receptor related protein 3	-0.560553	0.000699882
LRP4	4038	LDL receptor related protein 4	-0.565764	0.03492
LRP5	4041	LDL receptor related protein 5	0.491148	0.0126287
LRPPRC	10128	leucine rich pentatricopeptide repeat containing	0.320754	0.0181237
LRRC32	2615	leucine rich repeat containing 32	0.579661	0.0134044
LRRC36	55282	leucine rich repeat containing 36	-0.966827	0.0165308
LRRC42	115353	leucine rich repeat containing 42	0.251725	0.0144047
LRRC8D	55144	leucine rich repeat containing 8 VRAC subunit D	0.270471	0.0249445
LSM8	51691	LSM8 homolog, U6 small nuclear RNA associated	0.342713	0.0113161
LTA4H	4048	leukotriene A4 hydrolase	0.389707	0.0178714
LXN	56925	latexin	0.421987	0.0279184
LY6E	4061	lymphocyte antigen 6 family member E	0.27394	0.00616905
LYRM1	57149	LYR motif containing 1	0.309948	0.0171865
MAGED4B	81557	MAGE family member D4B	0.644782	0.014329
MALAT1	378938	metastasis associated lung adenocarcinoma transcript 1	1.04982	0.0175411
MALT1	10892	MALT1 paracaspase	0.37401	0.00396768
MAMLD1	10046	mastermind like domain containing 1	-0.608917	0.00409762
MAOA	4128	monoamine oxidase A	0.704593	0.00803545
MAP2K2	5605	mitogen-activated protein kinase kinase 2	0.307501	0.00136653
MAP2K3	5606	mitogen-activated protein kinase kinase 3	0.251188	0.0458054
MAP2K7	5609	mitogen-activated protein kinase kinase 7	0.251585	0.0391475
MAP3K8	1326	mitogen-activated protein kinase kinase kinase 8	0.556764	0.00968718
MAP4K4	9448	mitogen-activated protein kinase kinase kinase kinase 4	0.298499	0.0203124
MAP7D3	79649	MAP7 domain containing 3	0.535863	0.00155677
MAPK11	5600	mitogen-activated protein kinase 11	0.279731	0.0133393
MAPK12	6300	mitogen-activated protein kinase 12	0.325039	0.0152164
MAPRE3	22924	microtubule associated protein RP/EB family member 3	0.5412	0.014584
MARCHF2	51257	membrane associated ring-CH-type finger 2	0.257209	0.0337865
MAST3	23031	microtubule associated serine/threonine kinase 3	0.505809	0.0236668
MAVS	57506	mitochondrial antiviral signaling protein	0.299286	0.0440718
MBD2	8932	methyl-CpG binding domain protein 2	0.313868	0.0244702
MCC	4163	MCC regulator of WNT signaling pathway	0.464492	0.016751
MCM5	4174	minichromosome maintenance complex component 5	0.3448	0.0436619
MCPH1-AS1	100507530	MCPH1 antisense RNA 1	-0.719225	0.0126147
MDM2	4193	MDM2 proto-oncogene	0.467999	0.00486589
ME1	4199	malic enzyme 1	0.688074	2.26365e-06
ME3	10873	malic enzyme 3	0.483179	0.000401139
MED16	10025	mediator complex subunit 16	0.490355	0.000405557
MEIS2	4212	Meis homeobox 2	0.529729	0.0462363
MEPCE	56257	methylphosphate capping enzyme	0.286437	0.0114836
MEST	4232	mesoderm specific transcript	0.768269	0.0490855
METAP2	10988	methionyl aminopeptidase 2	0.334279	0.000301345
METTL16	79066	methyltransferase like 16	0.258325	0.0189173
METTL22	79091	methyltransferase like 22	0.284373	0.0411681
METTL26	84326	methyltransferase like 26	0.265216	0.0470991
METTL7A	25840	methyltransferase like 7A	0.939416	0.0130312
MFAP2	4237	microfibril associated protein 2	0.813714	0.0292158
MFNG	4242	MFNG O-fucosylpeptide 3-beta-N-acetylglucosaminyltransferase	0.332494	0.018645
MICAL1	64780	microtubule associated monooxygenase, calponin and LIM domain containing 1	0.46502	0.00630375
MICALL1	85377	MICAL like 1	0.316858	0.0118943
MIER1	57708	MIER1 transcriptional regulator	0.321797	0.0288269
MILR1	284021	mast cell immunoglobulin like receptor 1	0.854985	0.0304007
MLLT1	4298	MLLT1 super elongation complex subunit	0.263147	0.00676243
MLLT11	10962	MLLT11 transcription factor 7 cofactor	-0.261656	0.0462587
MMRN1	22915	multimerin 1	0.452216	0.044712
MOB3A	126308	MOB kinase activator 3A	0.288793	0.0166486
MORC2	22880	MORC family CW-type zinc finger 2	0.320985	0.0169069
MORC4	79710	MORC family CW-type zinc finger 4	-0.535025	0.00490594
MOV10	4343	Mov10 RISC complex RNA helicase	0.486272	0.00366926
MPP1	4354	membrane palmitoylated protein 1	0.259562	0.018023
MPP6	51678	membrane palmitoylated protein 6	0.285843	0.0336664
MR1	3140	major histocompatibility complex, class I-related	0.908168	0.0359282
MRAS	22808	muscle RAS oncogene homolog	-0.47417	0.0150713
MRE11	4361	MRE11 homolog, double strand break repair nuclease	0.398697	0.0182
MROH1	727957	maestro heat like repeat family member 1	0.270742	0.00329562
MRPL11	65003	mitochondrial ribosomal protein L11	0.322573	0.0152326
MRPL35	51318	mitochondrial ribosomal protein L35	0.293143	0.00716294
MRPL38	64978	mitochondrial ribosomal protein L38	0.310675	0.00316155
MRPS16	51021	mitochondrial ribosomal protein S16	0.250829	0.0232917
MRPS6	64968	mitochondrial ribosomal protein S6	0.322409	0.00255911
MSH3	4437	mutS homolog 3	0.29011	0.0421553
MSH6	2956	mutS homolog 6	0.259474	0.027683
MSMO1	6307	methylsterol monooxygenase 1	0.25435	0.0305641
MT1G	4495	metallothionein 1G	1.96593	0.0354018
MT1M	4499	metallothionein 1M	1.62362	0.0275374
MTCH2	23788	mitochondrial carrier 2	0.253606	0.0187789
MTDH	92140	metadherin	0.375487	0.0135873
MTHFS	10588	methenyltetrahydrofolate synthetase	0.571642	0.0186466
MTMR12	54545	myotubularin related protein 12	0.265067	0.0330955
MTND2P28	100652939	MT-ND2 pseudogene 28	1.7737	0.00577416
MTRNR2L1	100462977	MT-RNR2 like 1	-3.23616	0.00491046
MVK	4598	mevalonate kinase	0.394115	0.0112661
MX1	4599	MX dynamin like GTPase 1	1.3438	0.0026032
MXRA8	54587	matrix remodeling associated 8	1.07843	0.015578
MYL5	4636	myosin light chain 5	0.514939	0.0224304
MYL6B	140465	myosin light chain 6B	0.257317	0.0330099
MYOF	26509	myoferlin	0.409397	0.00870073
NAAA	27163	N-acylethanolamine acid amidase	0.631849	0.000243919
NACC2	138151	NACC family member 2	0.333807	0.0072259
NAP1L5	266812	nucleosome assembly protein 1 like 5	0.565697	0.00238419
NBAS	51594	NBAS subunit of NRZ tethering complex	0.329466	0.00169824
NBEAL1	65065	neurobeachin like 1	-0.485091	0.0193344
NBPF14	25832	NBPF member 14	0.681983	0.00768789
NEDD4	4734	NEDD4 E3 ubiquitin protein ligase	-0.422115	0.0140255
NEDD9	4739	neural precursor cell expressed, developmentally down-regulated 9	-0.264903	0.0461235
NEIL2	252969	nei like DNA glycosylase 2	0.304014	0.0197539
NELFE	7936	negative elongation factor complex member E	0.255015	0.0222466
NES	10763	nestin	0.289678	0.0333652
NET1	10276	neuroepithelial cell transforming 1	0.345935	0.0333331
NF2	4771	neurofibromin 2	0.290734	0.0268422
NFATC2	4773	nuclear factor of activated T cells 2	0.461244	0.0353808
NFE2L3	9603	nuclear factor, erythroid 2 like 3	0.376057	0.0179636
NFIB	4781	nuclear factor I B	0.599926	0.00364585
NFIC	4782	nuclear factor I C	0.261455	0.0363939
NFKBIE	4794	NFKB inhibitor epsilon	0.332218	0.0367188
NIPSNAP1	8508	nipsnap homolog 1	0.309816	0.0129426
NLE1	54475	notchless homolog 1	0.305151	0.0400875
NLRC3	197358	NLR family CARD domain containing 3	-1.57162	4.63274e-06
NME3	4832	NME/NM23 nucleoside diphosphate kinase 3	0.293409	0.0488837
NMNAT3	349565	nicotinamide nucleotide adenylyltransferase 3	-0.814278	0.0139487
NMT1	4836	N-myristoyltransferase 1	0.462366	0.00947368
NNT	23530	nicotinamide nucleotide transhydrogenase	0.417057	0.00516325
NOG	9241	noggin	-1.06793	0.0170938
NOP14	8602	NOP14 nucleolar protein	0.314468	0.00990296
NOP53	29997	NOP53 ribosome biogenesis factor	0.339571	0.00287559
NOP9	161424	NOP9 nucleolar protein	0.275282	0.0175458
NOTCH2NLA	388677	notch 2 N-terminal like A	0.758225	0.0262323
NOX4	50507	NADPH oxidase 4	-0.756844	7.78478e-05
NPAS2	4862	neuronal PAS domain protein 2	0.737601	0.00130704
NPEPL1	79716	aminopeptidase like 1	0.293649	0.0170457
NQO1	1728	NAD(P)H quinone dehydrogenase 1	0.521949	0.0063156
NR2F1	7025	nuclear receptor subfamily 2 group F member 1	0.336154	0.0417385
NR2F2	7026	nuclear receptor subfamily 2 group F member 2	0.405233	0.0041289
NRDE2	55051	NRDE-2, necessary for RNA interference, domain containing	0.38462	0.0148064
NRG1	3084	neuregulin 1	0.553209	0.00750696
NRGN	4900	neurogranin	0.37219	0.0290285
NT5C	30833	5', 3'-nucleotidase, cytosolic	0.475019	0.00480463
NT5E	4907	5'-nucleotidase ecto	0.382785	0.00126181
NUP133	55746	nucleoporin 133	0.348313	0.00919535
NUP155	9631	nucleoporin 155	0.288916	0.0155157
NUP43	348995	nucleoporin 43	0.29198	0.0174603
NUPR1	26471	nuclear protein 1, transcriptional regulator	0.991176	0.0227487
NVL	4931	nuclear VCP like	0.269733	0.0223842
NXPE3	91775	neurexophilin and PC-esterase domain family member 3	0.48877	0.00328154
ODC1	4953	ornithine decarboxylase 1	0.395426	0.0160301
ODF2L	57489	outer dense fiber of sperm tails 2 like	-0.423366	0.00940046
OGFR	11054	opioid growth factor receptor	0.288702	0.00527116
OLMALINC	90271	oligodendrocyte maturation-associated long intergenic non-coding RNA	-0.958186	0.00320169
OPHN1	4983	oligophrenin 1	-0.554187	0.00392427
OR4F17	81099	olfactory receptor family 4 subfamily F member 17	-1.13405	0.00848769
ORC4	5000	origin recognition complex subunit 4	-0.341351	0.0230564
OSBPL2	9885	oxysterol binding protein like 2	0.258007	0.0187652
OSBPL3	26031	oxysterol binding protein like 3	0.411368	0.0102549
OSGIN2	734	oxidative stress induced growth inhibitor family member 2	-0.291589	0.0303695
P2RX7	5027	purinergic receptor P2X 7	0.684063	0.0186546
PABPC1	26986	poly(A) binding protein cytoplasmic 1	0.2595	0.0230411
PACC1	55248	proton activated chloride channel 1	-0.264339	0.0220089
PALM	5064	paralemmin	0.749569	0.0032413
PALM2AKAP2	445815	PALM2 and AKAP2 fusion	0.344748	0.0477556
PAQR4	124222	progestin and adipoQ receptor family member 4	-0.35677	0.0145512
PARD3	56288	par-3 family cell polarity regulator	0.327329	0.0112017
PARP12	64761	poly(ADP-ribose) polymerase family member 12	0.358257	0.0404318
PCAT19	100505495	prostate cancer associated transcript 19	-0.45202	0.0195278
PCDH10	57575	protocadherin 10	-3.05004	0.00550128
PCDHB5	26167	protocadherin beta 5	-1.30742	0.000481694
PCDHGB5	56101	protocadherin gamma subfamily B, 5	-0.388441	0.0268582
PCDHGB6	56100	protocadherin gamma subfamily B, 6	-1.0939	0.0109181
PCM1	5108	pericentriolar material 1	0.253461	0.00861023
PCNX3	399909	pecanex 3	0.308767	0.0272983
PCSK5	5125	proprotein convertase subtilisin/kexin type 5	-1.49132	0.000305751
PDGFB	5155	platelet derived growth factor subunit B	-0.397002	0.0224251
PDGFC	56034	platelet derived growth factor C	-0.876537	0.0203355
PDLIM1	9124	PDZ and LIM domain 1	0.523069	0.000189875
PDLIM3	27295	PDZ and LIM domain 3	0.65264	0.00781927
PER3	8863	period circadian regulator 3	0.85334	0.0252751
PEX26	55670	peroxisomal biogenesis factor 26	0.298966	0.0426497
PFN2	5217	profilin 2	-0.291791	0.0154438
PHF19	26147	PHD finger protein 19	0.368275	0.00640376
PHLDA3	23612	pleckstrin homology like domain family A member 3	0.387508	0.0069265
PHLDB2	90102	pleckstrin homology like domain family B member 2	0.28421	0.0278469
PHYHIP	9796	phytanoyl-CoA 2-hydroxylase interacting protein	0.506708	0.0446882
PHYKPL	85007	5-phosphohydroxy-L-lysine phospho-lyase	0.317815	0.0208844
PIGL	9487	phosphatidylinositol glycan anchor biosynthesis class L	-0.568342	0.00798394
PIGP	51227	phosphatidylinositol glycan anchor biosynthesis class P	0.38845	0.0370103
PIK3CG	5294	phosphatidylinositol-4,5-bisphosphate 3-kinase catalytic subunit gamma	0.48844	0.0131845
PIP4K2C	79837	phosphatidylinositol-5-phosphate 4-kinase type 2 gamma	-0.876452	0.0177391
PITRM1	10531	pitrilysin metallopeptidase 1	0.27398	0.0152676
PKN1	5585	protein kinase N1	0.267622	0.00363798
PLA2G4A	5321	phospholipase A2 group IVA	-0.383297	0.00765455
PLA2R1	22925	phospholipase A2 receptor 1	0.488144	0.0304084
PLAC9	219348	placenta associated 9	0.83765	0.0117952
PLAT	5327	plasminogen activator, tissue type	0.367778	0.0387412
PLCB3	5331	phospholipase C beta 3	0.262393	0.00839592
PLD6	201164	phospholipase D family member 6	0.958009	0.0104723
PLEKHA6	22874	pleckstrin homology domain containing A6	0.715803	0.0104056
PLEKHF1	79156	pleckstrin homology and FYVE domain containing 1	0.624282	0.00149099
PLEKHG4	25894	pleckstrin homology and RhoGEF domain containing G4	0.391775	0.0246422
PLEKHO2	80301	pleckstrin homology domain containing O2	0.303604	0.0278914
PLGRKT	55848	plasminogen receptor with a C-terminal lysine	-0.370168	0.0403195
PLK2	10769	polo like kinase 2	0.56166	0.0107651
PLTP	5360	phospholipid transfer protein	0.478335	0.0132321
PNMA2	10687	PNMA family member 2	1.06732	0.0280917
PNPLA6	10908	patatin like phospholipase domain containing 6	0.380141	0.0054608
PNPO	55163	pyridoxamine 5'-phosphate oxidase	0.419654	0.00495166
POLR2M	81488	RNA polymerase II subunit M	0.349398	0.00574803
POLR3G	10622	RNA polymerase III subunit G	0.478022	0.0160319
POMK	84197	protein O-mannose kinase	-0.648304	0.0420394
POP7	10248	POP7 homolog, ribonuclease P/MRP subunit	0.286507	0.0327657
PPIAP22	653214	peptidylprolyl isomerase A pseudogene 22	1.58683	0.00732332
PPIF	10105	peptidylprolyl isomerase F	0.398879	0.00244576
PPIG	9360	peptidylprolyl isomerase G	0.338645	0.00661169
PPM1F	9647	protein phosphatase, Mg2+/Mn2+ dependent 1F	0.310463	0.0270926
PPM1G	5496	protein phosphatase, Mg2+/Mn2+ dependent 1G	0.283717	0.000416095
PPP1R12C	54776	protein phosphatase 1 regulatory subunit 12C	0.325897	0.0152408
PPP1R16A	84988	protein phosphatase 1 regulatory subunit 16A	0.335741	0.0280668
PRADC1	84279	protease associated domain containing 1	0.267824	0.0238147
PRKAR2B	5577	protein kinase cAMP-dependent type II regulatory subunit beta	0.377782	0.0134547
PRKCH	5583	protein kinase C eta	0.355248	0.000520448
PRKG1	5592	protein kinase cGMP-dependent 1	1.13089	0.0140976
PRKG1-AS1	100506939	PRKG1 antisense RNA 1	-1.18129	0.00183045
PRMT7	54496	protein arginine methyltransferase 7	0.411118	0.0226994
PROB1	389333	proline rich basic protein 1	0.581795	0.0155078
PRPF6	24148	pre-mRNA processing factor 6	0.262004	0.00240454
PRPH2	5961	peripherin 2	2.0954	0.00757384
PRR5L	79899	proline rich 5 like	0.839145	0.0163491
PRR7	80758	proline rich 7, synaptic	0.642374	0.00545073
PRRT3	285368	proline rich transmembrane protein 3	0.426613	0.0214841
PRTFDC1	56952	phosphoribosyl transferase domain containing 1	0.508055	0.0100504
PRTG	283659	protogenin	-0.706474	0.0186141
PSD3	23362	pleckstrin and Sec7 domain containing 3	0.403949	0.0253783
PSMB10	5699	proteasome 20S subunit beta 10	0.36988	0.00733483
PSMB8	5696	proteasome 20S subunit beta 8	0.348223	0.0151327
PSMB9	5698	proteasome 20S subunit beta 9	0.595353	0.0444612
PSME2	5721	proteasome activator subunit 2	0.271411	0.0474904
PSME4	23198	proteasome activator subunit 4	0.271484	0.00495037
PTDSS2	81490	phosphatidylserine synthase 2	0.325041	0.00359019
PTEN	5728	phosphatase and tensin homolog	0.507946	0.00121562
PTGR1	22949	prostaglandin reductase 1	0.455169	0.0167674
PTGS1	5742	prostaglandin-endoperoxide synthase 1	1.23585	0.000241906
PTMA	5757	prothymosin alpha	0.268866	0.0144984
PTP4A2	8073	protein tyrosine phosphatase 4A2	0.250307	0.0282327
PTPA	5524	protein phosphatase 2 phosphatase activator	0.321221	0.00145912
PTPN4	5775	protein tyrosine phosphatase non-receptor type 4	0.314468	0.0277755
PTPRS	5802	protein tyrosine phosphatase receptor type S	0.502882	0.0442433
PTX3	5806	pentraxin 3	0.836826	0.00144698
PURA	5813	purine rich element binding protein A	0.363647	0.00521841
PUS3	83480	pseudouridine synthase 3	0.276054	0.0481134
PUS7L	83448	pseudouridine synthase 7 like	0.345537	0.0246202
PYGL	5836	glycogen phosphorylase L	0.575329	7.374e-05
QPCT	25797	glutaminyl-peptide cyclotransferase	0.410402	0.00372398
RAB11FIP5	26056	RAB11 family interacting protein 5	0.330312	0.000836598
RAB13	5872	RAB13, member RAS oncogene family	0.27	0.0257555
RAB29	8934	RAB29, member RAS oncogene family	0.345428	0.0264898
RAB33B	83452	RAB33B, member RAS oncogene family	0.349303	0.0104278
RAB34	83871	RAB34, member RAS oncogene family	1.2495	0.0012475
RABEP2	79874	rabaptin, RAB GTPase binding effector protein 2	0.296176	0.0208856
RABL6	55684	RAB, member RAS oncogene family like 6	0.389529	3.1093e-05
RAC2	5880	Rac family small GTPase 2	0.318709	0.015548
RAD50	10111	RAD50 double strand break repair protein	0.497804	0.000885977
RAI1	10743	retinoic acid induced 1	0.298087	0.0187506
RALA	5898	RAS like proto-oncogene A	-0.358998	0.0146102
RAN	5901	RAN, member RAS oncogene family	0.281268	0.0233213
RANGAP1	5905	Ran GTPase activating protein 1	0.272501	0.00171177
RAPGEF3	10411	Rap guanine nucleotide exchange factor 3	0.307023	0.0361312
RASAL2-AS1	100302401	RASAL2 antisense RNA 1	-1.2199	0.00144012
RASIP1	54922	Ras interacting protein 1	0.283232	0.00188305
RBM10	8241	RNA binding motif protein 10	0.31553	0.005333
RBM24	221662	RNA binding motif protein 24	-0.527108	0.0116581
RBM25	58517	RNA binding motif protein 25	0.288269	0.00782767
RCN1	5954	reticulocalbin 1	0.771148	1.89533e-05
RCN1P2	728913	reticulocalbin 1 pseudogene 2	2.00294	0.0011702
RDH10	157506	retinol dehydrogenase 10	0.535971	0.0168509
RECQL5	9400	RecQ like helicase 5	0.392291	0.0290838
RELB	5971	RELB proto-oncogene, NF-kB subunit	0.514709	0.00846863
REPS1	85021	RALBP1 associated Eps domain containing 1	0.283529	0.0175057
RETREG3	162427	reticulophagy regulator family member 3	0.274305	0.0335074
REXO4	57109	REX4 homolog, 3'-5' exonuclease	0.275789	0.0108172
RFLNB	359845	refilin B	0.328212	0.0334238
RFT1	91869	RFT1 homolog	0.251108	0.012641
RFTN1	23180	raftlin, lipid raft linker 1	0.253798	0.0120008
RIMKLB	57494	ribosomal modification protein rimK like family member B	-0.304461	0.0124594
RIN1	9610	Ras and Rab interactor 1	0.342531	0.0209554
RIPK3	11035	receptor interacting serine/threonine kinase 3	-0.406407	0.0434985
RNASEH2A	10535	ribonuclease H2 subunit A	0.286806	0.0250264
RNF125	54941	ring finger protein 125	-0.467746	0.0345364
RNF144B	255488	ring finger protein 144B	0.392589	0.0122545
RNF168	165918	ring finger protein 168	0.433483	0.011767
RNF169	254225	ring finger protein 169	0.459143	0.0295555
RNF19B	127544	ring finger protein 19B	0.370119	0.00199811
RNH1	6050	ribonuclease/angiogenin inhibitor 1	0.280971	0.00473352
RPE	6120	ribulose-5-phosphate-3-epimerase	0.26115	0.0105378
RPIA	22934	ribose 5-phosphate isomerase A	0.309108	0.0255241
RPL12	6136	ribosomal protein L12	0.285798	0.014569
RPL22L1	200916	ribosomal protein L22 like 1	0.496945	0.0083127
RPL22P1	125371	ribosomal protein L22 pseudogene 1	0.556429	0.025438
RPL27A	6157	ribosomal protein L27a	0.315931	0.0149376
RPL3	6122	ribosomal protein L3	0.252183	0.0236968
RPL4	6124	ribosomal protein L4	0.262036	0.0262358
RPS2	6187	ribosomal protein S2	0.334205	0.00729429
RPS2P46	125208	ribosomal protein S2 pseudogene 46	1.31711	0.0147743
RPS3	6188	ribosomal protein S3	0.250942	0.0431279
RPS6	6194	ribosomal protein S6	0.254844	0.0428114
RPS6KA6	27330	ribosomal protein S6 kinase A6	-1.37632	0.00457361
RPS6KB2	6199	ribosomal protein S6 kinase B2	0.39316	0.00260461
RPUSD1	113000	RNA pseudouridine synthase domain containing 1	0.294342	0.00830625
RPUSD4	84881	RNA pseudouridine synthase D4	0.288476	0.00332908
RRM2B	50484	ribonucleotide reductase regulatory TP53 inducible subunit M2B	0.316363	0.0114227
RRP1	8568	ribosomal RNA processing 1	0.289947	0.0311807
RSAD1	55316	radical S-adenosyl methionine domain containing 1	0.279384	0.0251046
RSF1	51773	remodeling and spacing factor 1	0.500784	0.0234035
RSRP1	57035	arginine and serine rich protein 1	-0.353866	0.0313755
RTCA-AS1	100506007	RTCA antisense RNA 1	-1.4424	2.8202e-05
RUVBL2	10856	RuvB like AAA ATPase 2	0.270022	0.00500251
RXRA	6256	retinoid X receptor alpha	0.363105	0.0175458
S100A3	6274	S100 calcium binding protein A3	0.866951	0.00912333
S1PR3	1903	sphingosine-1-phosphate receptor 3	1.44128	0.00127501
SAMD12	401474	sterile alpha motif domain containing 12	-0.693384	0.0316504
SAMSN1	64092	SAM domain, SH3 domain and nuclear localization signals 1	-2.26947	0.00219264
SARM1	23098	sterile alpha and TIR motif containing 1	0.487057	0.0415968
SART3	9733	spliceosome associated factor 3, U4/U6 recycling protein	0.275709	0.0233395
SBF1	6305	SET binding factor 1	0.267738	0.00172928
SCARB1	949	scavenger receptor class B member 1	0.337299	0.0454249
SCRIB	23513	scribble planar cell polarity protein	0.301087	0.00803653
SDC1	6382	syndecan 1	0.98087	0.0182531
SDC4	6385	syndecan 4	0.373955	0.0102473
SEMA3A	10371	semaphorin 3A	1.54687	0.00241834
SEMA3F	6405	semaphorin 3F	0.369985	0.00769343
SEMA4B	10509	semaphorin 4B	0.318845	0.0326121
SENCR	100507392	smooth muscle and endothelial cell enriched migration/differentiation-associated lncRNA	0.346365	0.0468466
SEPTIN9	10801	septin 9	0.36866	0.00991257
SERGEF	26297	secretion regulating guanine nucleotide exchange factor	0.439861	0.0448181
SERPIND1	3053	serpin family D member 1	1.01888	0.018653
SERTAD4-AS1	574036	SERTAD4 antisense RNA 1	-0.629923	0.0180614
SH3TC1	54436	SH3 domain and tetratricopeptide repeats 1	0.356768	0.0207498
SHISA9	729993	shisa family member 9	-1.40561	0.000725854
SIAE	54414	sialic acid acetylesterase	0.327549	0.00942809
SIGIRR	59307	single Ig and TIR domain containing	0.260917	0.0285032
SIPA1	6494	signal-induced proliferation-associated 1	0.343819	0.0312355
SKIV2L	6499	Ski2 like RNA helicase	0.331278	0.0437396
SLC12A2	6558	solute carrier family 12 member 2	0.487274	0.00666845
SLC12A7	10723	solute carrier family 12 member 7	0.283955	0.0462735
SLC12A9	56996	solute carrier family 12 member 9	0.470658	0.00124431
SLC15A3	51296	solute carrier family 15 member 3	0.698134	0.0239186
SLC25A3	5250	solute carrier family 25 member 3	0.270247	0.00365046
SLC25A51P4	494141	SLC25A51 pseudogene 4	0.447019	0.022178
SLC26A4-AS1	286002	SLC26A4 antisense RNA 1	-1.1527	0.0124427
SLC27A3	11000	solute carrier family 27 member 3	0.333971	0.0384109
SLC35E4	339665	solute carrier family 35 member E4	0.27851	0.025731
SLC40A1	30061	solute carrier family 40 member 1	0.44326	0.00510484
SLC47A1	55244	solute carrier family 47 member 1	0.868135	0.0432489
SLC48A1	55652	solute carrier family 48 member 1	0.427141	0.0181526
SLC9A3R2	9351	SLC9A3 regulator 2	0.383442	0.0284748
SLC9A7	84679	solute carrier family 9 member A7	0.693124	0.00659849
SLC9A8	23315	solute carrier family 9 member A8	0.374497	0.0450678
SLIT2	9353	slit guidance ligand 2	-1.18128	0.0164615
SLX1A	548593	SLX1 homolog A, structure-specific endonuclease subunit	0.415122	0.0362001
SMAGP	57228	small cell adhesion glycoprotein	0.579411	0.0022959
SMARCA4	6597	SWI/SNF related, matrix associated, actin dependent regulator of chromatin, subfamily a, member 4	0.431519	0.00103827
SMC2	10592	structural maintenance of chromosomes 2	0.321787	0.0378372
SMIM11B	102723553	small integral membrane protein 11B	2.58597	0.00387835
SND1	27044	staphylococcal nuclease and tudor domain containing 1	0.263558	0.00720892
SNHG26	109729180	small nucleolar RNA host gene 26	0.529329	0.0110999
SNHG7	84973	small nucleolar RNA host gene 7	0.571865	0.0432871
SNX24	28966	sorting nexin 24	0.346853	0.0465959
SNX30	401548	sorting nexin family member 30	0.260605	0.0462473
SNX5	27131	sorting nexin 5	0.345671	0.00180628
SORBS1	10580	sorbin and SH3 domain containing 1	0.598322	0.00320299
SORD	6652	sorbitol dehydrogenase	0.296207	0.012963
SOX12	6666	SRY-box transcription factor 12	0.413387	0.0205877
SOX4	6659	SRY-box transcription factor 4	0.336952	0.0138177
SP100	6672	SP100 nuclear antigen	0.261209	0.0047774
SPNS2	124976	sphingolipid transporter 2	0.524091	0.00128673
SPOCK1	6695	SPARC (osteonectin), cwcv and kazal like domains proteoglycan 1	-0.46416	0.0142275
SQLE	6713	squalene epoxidase	0.380163	0.00240807
SQOR	58472	sulfide quinone oxidoreductase	0.302923	0.0200415
SREBF2	6721	sterol regulatory element binding transcription factor 2	0.295151	0.00519435
SREK1	140890	splicing regulatory glutamic acid and lysine rich protein 1	0.252362	0.0402158
SRPK2	6733	SRSF protein kinase 2	0.316933	0.01092
SSBP2	23635	single stranded DNA binding protein 2	-0.441271	0.0426631
SSBP4	170463	single stranded DNA binding protein 4	0.296506	0.00329539
STAG3L4	64940	stromal antigen 3-like 4 (pseudogene)	-0.48028	0.0160053
STIM1	6786	stromal interaction molecule 1	0.289668	0.0203075
STK32C	282974	serine/threonine kinase 32C	0.39913	0.030936
STMN3	50861	stathmin 3	-1.09318	0.0148883
STRIP2	57464	striatin interacting protein 2	0.625799	0.0256051
STX17-AS1	441461	STX17 antisense RNA 1	-0.781355	0.0242319
SULT1A1	6817	sulfotransferase family 1A member 1	1.26808	0.00662665
SULT1A3	6818	sulfotransferase family 1A member 3	1.28493	0.00167745
SUSD1	64420	sushi domain containing 1	0.323432	0.0147898
SYNGAP1	8831	synaptic Ras GTPase activating protein 1	0.788697	0.0366788
SYS1	90196	SYS1 golgi trafficking protein	0.265505	0.0204555
SYT14	255928	synaptotagmin 14	-1.49727	0.00764809
SYTL3	94120	synaptotagmin like 3	0.656313	0.0445156
TACC2	10579	transforming acidic coiled-coil containing protein 2	0.341193	0.0495459
TACC3	10460	transforming acidic coiled-coil containing protein 3	0.386185	0.0499698
TACSTD2	4070	tumor associated calcium signal transducer 2	0.765535	0.0304145
TAF3	83860	TATA-box binding protein associated factor 3	0.380098	0.00255621
TAOK3	51347	TAO kinase 3	0.349667	0.0402781
TAP1	6890	transporter 1, ATP binding cassette subfamily B member	0.285804	0.0205723
TAP2	6891	transporter 2, ATP binding cassette subfamily B member	0.670894	0.0056234
TAPBP	6892	TAP binding protein	0.304865	0.040127
TARS2	80222	threonyl-tRNA synthetase 2, mitochondrial	0.288784	0.0155517
TASOR	23272	transcription activation suppressor	0.336142	0.0112681
TATDN2	9797	TatD DNase domain containing 2	0.307225	0.0396813
TBC1D1	23216	TBC1 domain family member 1	0.343475	0.00563218
TBC1D2	55357	TBC1 domain family member 2	0.639493	6.67268e-05
TBC1D24	57465	TBC1 domain family member 24	0.322106	0.0123266
TBC1D32	221322	TBC1 domain family member 32	-0.600259	0.0404154
TBC1D8B	54885	TBC1 domain family member 8B	-0.548616	0.0117965
TBCD	6904	tubulin folding cofactor D	0.274424	0.022194
TBL3	10607	transducin beta like 3	0.310979	0.0189542
TCAF2	285966	TRPM8 channel associated factor 2	0.497267	0.000850002
TCF15	6939	transcription factor 15	1.45919	0.00518991
TCF19	6941	transcription factor 19	0.465083	0.0226833
TCF25	22980	transcription factor 25	0.271468	0.0296286
TCF3	6929	transcription factor 3	0.259337	0.0291786
TEAD4	7004	TEA domain transcription factor 4	0.386476	0.000283063
TECPR1	25851	tectonin beta-propeller repeat containing 1	0.324905	0.0424629
TGFBR3	7049	transforming growth factor beta receptor 3	0.678057	0.0457681
TGM2	7052	transglutaminase 2	0.609475	0.0355431
THAP7	80764	THAP domain containing 7	0.380691	0.011177
THEMIS2	9473	thymocyte selection associated family member 2	0.719302	0.0131816
THOC5	8563	THO complex 5	0.27576	0.0176036
THOP1	7064	thimet oligopeptidase 1	0.277913	0.0194718
THUMPD3	25917	THUMP domain containing 3	0.343248	0.0122924
TIAL1	7073	TIA1 cytotoxic granule associated RNA binding protein like 1	0.264497	0.00404639
TIGD1	200765	tigger transposable element derived 1	-0.875178	0.000735886
TIMM9	26520	translocase of inner mitochondrial membrane 9	0.322705	0.0410876
TIMP1	7076	TIMP metallopeptidase inhibitor 1	0.333524	0.0311161
TIMP3	7078	TIMP metallopeptidase inhibitor 3	2.15134	0.0181569
TKT	7086	transketolase	0.442848	0.000809406
TLE3	7090	TLE family member 3, transcriptional corepressor	0.426502	0.00816131
TLN1	7094	talin 1	0.3048	0.00214768
TMCO4	255104	transmembrane and coiled-coil domains 4	0.890353	9.57264e-05
TMEM106C	79022	transmembrane protein 106C	0.361223	0.0456856
TMEM156	80008	transmembrane protein 156	1.24253	0.00158814
TMEM171	134285	transmembrane protein 171	0.470229	0.0402484
TMEM200A	114801	transmembrane protein 200A	1.70732	0.0490432
TMEM212	389177	transmembrane protein 212	-0.864854	0.0105151
TMEM237	65062	transmembrane protein 237	0.406902	0.0104745
TMEM44	93109	transmembrane protein 44	0.409592	0.00307304
TMEM65	157378	transmembrane protein 65	-0.327791	0.0112521
TMEM87B	84910	transmembrane protein 87B	0.379908	0.00530534
TMOD1	7111	tropomodulin 1	0.922859	0.0467238
TNFAIP2	7127	TNF alpha induced protein 2	0.397532	0.0278368
TNFAIP8L1	126282	TNF alpha induced protein 8 like 1	0.514414	0.000495621
TNFRSF14	8764	TNF receptor superfamily member 14	0.408105	0.0200838
TNFRSF1A	7132	TNF receptor superfamily member 1A	0.28651	0.0217102
TNFRSF6B	8771	TNF receptor superfamily member 6b	1.10691	0.0144947
TNFSF18	8995	TNF superfamily member 18	0.753328	0.00425227
TNIK	23043	TRAF2 and NCK interacting kinase	0.444324	0.0242289
TNIP1	10318	TNFAIP3 interacting protein 1	0.333603	0.00214249
TOE1	114034	target of EGR1, exonuclease	0.333148	0.0278218
TOM1L1	10040	target of myb1 like 1 membrane trafficking protein	2.12588	0.00170119
TOMM7	54543	translocase of outer mitochondrial membrane 7	0.398844	0.0125017
TOP1	7150	DNA topoisomerase I	0.29541	0.00105415
TOP1MT	116447	DNA topoisomerase I mitochondrial	0.420434	0.000275704
TOP2B	7155	DNA topoisomerase II beta	0.272806	0.00603463
TOR4A	54863	torsin family 4 member A	0.256855	0.0306054
TP53I11	9537	tumor protein p53 inducible protein 11	0.544245	0.0159335
TPCN1	53373	two pore segment channel 1	0.576275	0.00130267
TPM2	7169	tropomyosin 2	1.82541	2.42227e-05
TPM3P9	147804	tropomyosin 3 pseudogene 9	-0.506657	0.0224023
TPRN	286262	taperin	0.3181	0.0201577
TPTEP1	387590	TPTE pseudogene 1	-1.45181	0.0491484
TRAC	28755	T cell receptor alpha constant	-0.679236	0.0155965
TRAF7	84231	TNF receptor associated factor 7	0.250915	0.00336644
TRAPPC9	83696	trafficking protein particle complex 9	0.343202	0.0155506
TRBC2	28638	T cell receptor beta constant 2	0.574177	0.0345526
TRIM16L	147166	tripartite motif containing 16 like	0.622398	0.00882953
TRIM22	10346	tripartite motif containing 22	0.38025	0.022507
TRIM24	8805	tripartite motif containing 24	1.20595	7.07366e-07
TRIM25	7706	tripartite motif containing 25	0.350705	0.0410787
TRIM37	4591	tripartite motif containing 37	0.256269	0.0377076
TRIM44	54765	tripartite motif containing 44	0.281907	0.0422657
TRIM5	85363	tripartite motif containing 5	0.417996	0.000792757
TRIM56	81844	tripartite motif containing 56	0.336358	0.0262319
TRIM7	81786	tripartite motif containing 7	0.663926	0.0303345
TRIM8	81603	tripartite motif containing 8	0.254798	0.0225194
TRIP6	7205	thyroid hormone receptor interactor 6	0.345701	0.000809682
TSBP1-AS1	101929163	TSBP1 and BTNL2 antisense RNA 1	-1.25303	0.00114717
TSC22D1	8848	TSC22 domain family member 1	0.366951	0.00684802
TSHZ1	10194	teashirt zinc finger homeobox 1	0.484836	0.0076673
TSPAN13	27075	tetraspanin 13	-0.667856	0.000402951
TSPAN4	7106	tetraspanin 4	0.295308	0.0265205
TSPAN5	10098	tetraspanin 5	0.349145	0.0488472
TSPYL1	7259	TSPY like 1	0.461827	0.00141815
TST	7263	thiosulfate sulfurtransferase	0.321517	0.0335498
TTC12	54970	tetratricopeptide repeat domain 12	-0.848428	0.0188113
TTC27	55622	tetratricopeptide repeat domain 27	0.297202	0.00881007
TTTY10	246119	testis-specific transcript, Y-linked 10	-1.14689	0.0177817
TUFT1	7286	tuftelin 1	0.458438	0.0219872
TUSC3	7991	tumor suppressor candidate 3	2.09682	0.032062
TWIST2	117581	twist family bHLH transcription factor 2	2.05151	0.000834264
TXLNA	200081	taxilin alpha	0.392157	0.015847
TXNRD2	10587	thioredoxin reductase 2	0.389214	0.000641229
UBA6-AS1	550112	UBA6 antisense RNA 1 (head to head)	-0.37379	0.0199655
UBE2L6	9246	ubiquitin conjugating enzyme E2 L6	0.662605	0.00110182
UBQLN4	56893	ubiquilin 4	0.263695	0.0123022
UBR4	23352	ubiquitin protein ligase E3 component n-recognin 4	0.318591	0.0462691
UCP2	7351	uncoupling protein 2	1.16503	0.00290876
UFSP2	55325	UFM1 specific peptidase 2	0.326419	0.0166719
UGDH-AS1	100885776	UGDH antisense RNA 1	-0.839822	0.00915069
ULK3	25989	unc-51 like kinase 3	0.25208	0.0449617
ULK4	54986	unc-51 like kinase 4	-0.88277	0.0130956
USP1	7398	ubiquitin specific peptidase 1	0.277527	0.0299747
USP18	11274	ubiquitin specific peptidase 18	0.520683	0.0144916
USP32P1	162632	ubiquitin specific peptidase 32 pseudogene 1	2.10214	0.00526383
VAV2	7410	vav guanine nucleotide exchange factor 2	0.283702	0.0364181
VIPR1	7433	vasoactive intestinal peptide receptor 1	1.25438	0.0328566
VPS18	57617	VPS18 core subunit of CORVET and HOPS complexes	0.287077	0.0060578
VPS51	738	VPS51 subunit of GARP complex	0.377911	0.0159124
VWCE	220001	von Willebrand factor C and EGF domains	0.44719	0.0336962
WARS2	10352	tryptophanyl tRNA synthetase 2, mitochondrial	0.32907	0.00831985
WASF1	8936	WASP family member 1	-0.269587	0.034329
WDPCP	51057	WD repeat containing planar cell polarity effector	-0.823918	0.0016447
WDR25	79446	WD repeat domain 25	0.491257	0.0255516
WDR34	89891	WD repeat domain 34	0.337997	0.023322
WDR53	348793	WD repeat domain 53	0.308451	0.035575
WDR73	84942	WD repeat domain 73	0.290863	0.021011
WNK4	65266	WNK lysine deficient protein kinase 4	-0.910769	0.01068
WRAP73	49856	WD repeat containing, antisense to TP73	-0.330982	0.0369119
XACT	105463123	X active specific transcript	-1.5696	0.00197305
XPNPEP3	63929	X-prolyl aminopeptidase 3	-0.659048	0.00181996
YBX3	8531	Y-box binding protein 3	0.380955	0.00228319
YIPF2	78992	Yip1 domain family member 2	0.285333	0.00244317
ZADH2	284273	zinc binding alcohol dehydrogenase domain containing 2	0.356525	0.0155775
ZBED3-AS1	728723	ZBED3 antisense RNA 1	-0.916509	0.0106574
ZBTB17	7709	zinc finger and BTB domain containing 17	0.279059	0.0304262
ZBTB7B	51043	zinc finger and BTB domain containing 7B	0.363081	0.0178652
ZCCHC2	54877	zinc finger CCHC-type containing 2	0.36629	0.0499238
ZCCHC24	219654	zinc finger CCHC-type containing 24	0.383743	0.0344031
ZFP64	55734	ZFP64 zinc finger protein	0.302898	0.00796981
ZFYVE9	9372	zinc finger FYVE-type containing 9	0.380899	0.0171379
ZGRF1	55345	zinc finger GRF-type containing 1	-0.779069	0.0273267
ZMAT3	64393	zinc finger matrin-type 3	0.349692	0.00848813
ZNF181	339318	zinc finger protein 181	0.442202	0.0296466
ZNF219	51222	zinc finger protein 219	0.531184	0.0101456
ZNF232	7775	zinc finger protein 232	0.538267	0.0395032
ZNF277	11179	zinc finger protein 277	0.263085	0.0495955
ZNF282	8427	zinc finger protein 282	0.259078	0.02176
ZNF317	57693	zinc finger protein 317	0.323918	0.018696
ZNF331	55422	zinc finger protein 331	-0.578738	0.0305841
ZNF415	55786	zinc finger protein 415	2.01075	0.00218672
ZNF416	55659	zinc finger protein 416	0.350141	0.0093619
ZNF431	170959	zinc finger protein 431	-0.443992	0.0246045
ZNF438	220929	zinc finger protein 438	0.324812	0.0410459
ZNF467	168544	zinc finger protein 467	0.92873	0.0044912
ZNF468	90333	zinc finger protein 468	-0.432953	0.0206851
ZNF490	57474	zinc finger protein 490	0.445825	0.026822
ZNF500	26048	zinc finger protein 500	-0.509366	0.0308404
ZNF564	163050	zinc finger protein 564	0.307887	0.0333281
ZNF598	90850	zinc finger protein 598	0.270892	0.0177483
ZNF606	80095	zinc finger protein 606	0.553595	0.0107892
ZNF652	22834	zinc finger protein 652	0.555661	0.0115036
ZNF66	7617	zinc finger protein 66	-1.00026	0.00531972
ZNF736	728927	zinc finger protein 736	-0.594108	0.0454636
ZNF772	400720	zinc finger protein 772	-0.510421	0.0487278
ZNF791	163049	zinc finger protein 791	0.276827	0.0394974
ZNF793	390927	zinc finger protein 793	0.937779	0.0118928
ZP3	7784	zona pellucida glycoprotein 3	1.83121	0.0226928
ZXDB	158586	zinc finger X-linked duplicated B	0.250214	0.0394319

## Sheet: SMC co-cul w BMPR2 mut. Normox.
SYMBOL	ENTREZID	GENENAME	logFC	PValue
ABCC5	10057	ATP binding cassette subfamily C member 5	-0.427561	0.0470784
ABCF2	10061	ATP binding cassette subfamily F member 2	-0.346372	0.0361462
ABHD10	55347	abhydrolase domain containing 10	-0.442826	0.0115807
ABI3BP	25890	ABI family member 3 binding protein	-0.597109	0.0149429
ABL1	25	ABL proto-oncogene 1, non-receptor tyrosine kinase	-0.299993	0.0376268
ABTB1	80325	ankyrin repeat and BTB domain containing 1	0.510746	0.00927272
ACAD10	80724	acyl-CoA dehydrogenase family member 10	0.487487	0.0144199
ACAP1	9744	ArfGAP with coiled-coil, ankyrin repeat and PH domains 1	1.29829	0.0114874
ACLY	47	ATP citrate lyase	-0.30337	0.0349798
ACOT13	55856	acyl-CoA thioesterase 13	0.404098	0.0361541
ACTN1	87	actinin alpha 1	-0.341532	0.0354356
ACTN4	81	actinin alpha 4	-0.52711	0.00826874
ACTR3	10096	actin related protein 3	-0.413916	0.0314895
ACVR2B	93	activin A receptor type 2B	0.560447	0.0439146
ADAM12	8038	ADAM metallopeptidase domain 12	-0.473932	0.0240543
ADAM15	8751	ADAM metallopeptidase domain 15	0.394972	0.0129296
ADAMTS1	9510	ADAM metallopeptidase with thrombospondin type 1 motif 1	-0.618782	0.00602329
ADAP1	11033	ArfGAP with dual PH domains 1	0.774014	0.0269991
ADCY7	113	adenylate cyclase 7	-0.446568	0.0309572
ADGRG6	57211	adhesion G protein-coupled receptor G6	-0.989666	0.0374092
ADIPOR2	79602	adiponectin receptor 2	-0.379946	0.00902887
AFAP1	60312	actin filament associated protein 1	-0.555955	0.00795852
AFTPH	54812	aftiphilin	0.409812	0.0453252
AGAP3	116988	ArfGAP with GTPase domain, ankyrin repeat and PH domain 3	0.387833	0.0144158
AGK	55750	acylglycerol kinase	-0.561827	0.0222188
AGPAT2	10555	1-acylglycerol-3-phosphate O-acyltransferase 2	0.400561	0.00238654
AKAP13	11214	A-kinase anchoring protein 13	0.448874	0.0378846
AKAP6	9472	A-kinase anchoring protein 6	-0.928158	0.00940675
AKR1B1	231	aldo-keto reductase family 1 member B	0.370132	0.034843
ALDH16A1	126133	aldehyde dehydrogenase 16 family member A1	0.394939	0.0277573
ALDH1B1	219	aldehyde dehydrogenase 1 family member B1	-0.55454	0.0414983
ALDH9A1	223	aldehyde dehydrogenase 9 family member A1	-0.371429	0.0296556
ALG13	79868	ALG13 UDP-N-acetylglucosaminyltransferase subunit	-0.383627	0.0456543
ALG9	79796	ALG9 alpha-1,2-mannosyltransferase	0.301429	0.029556
ALKBH3	221120	alkB homolog 3, alpha-ketoglutaratedependent dioxygenase	0.412848	0.0199706
ALKBH7	84266	alkB homolog 7	0.479666	0.0141803
ALPK2	115701	alpha kinase 2	-1.06194	0.00150361
AMOT	154796	angiomotin	-1.37563	0.0386713
AMOTL1	154810	angiomotin like 1	-0.386134	0.0387385
AMOTL2	51421	angiomotin like 2	-0.795289	0.00260227
AMZ2	51321	archaelysin family metallopeptidase 2	0.313876	0.0443252
ANGEL2	90806	angel homolog 2	-0.571925	0.0113942
ANKEF1	63926	ankyrin repeat and EF-hand domain containing 1	-1.45346	0.00346653
ANKRD26	22852	ankyrin repeat domain 26	0.701204	0.0286654
ANKRD36B	57730	ankyrin repeat domain 36B	1.16748	0.023748
ANKRD36C	400986	ankyrin repeat domain 36C	1.27149	0.000745123
ANKRD46	157567	ankyrin repeat domain 46	-0.505988	0.033752
ANKRD50	57182	ankyrin repeat domain 50	-0.460306	0.0337988
ANKRD9	122416	ankyrin repeat domain 9	0.452409	0.0360782
ANP32B	10541	acidic nuclear phosphoprotein 32 family member B	0.311631	0.026326
AP2S1	1175	adaptor related protein complex 2 subunit sigma 1	0.370787	0.0447284
AP3S2	10239	adaptor related protein complex 3 subunit sigma 2	-0.752155	0.0186529
AP4E1	23431	adaptor related protein complex 4 subunit epsilon 1	-0.46633	0.0337003
APBA1	320	amyloid beta precursor protein binding family A member 1	-0.710841	0.0486884
API5	8539	apoptosis inhibitor 5	-0.392701	0.0417757
ARHGAP11A	9824	Rho GTPase activating protein 11A	-0.871671	0.00427402
ARHGAP21	57584	Rho GTPase activating protein 21	-0.344327	0.0406367
ARHGAP29	9411	Rho GTPase activating protein 29	-0.812142	0.0258189
ARHGEF11	9826	Rho guanine nucleotide exchange factor 11	-0.523591	0.0148087
ARHGEF7	8874	Rho guanine nucleotide exchange factor 7	-0.546714	0.00378096
ARID4A	5926	AT-rich interaction domain 4A	0.612129	0.0376231
ARMCX7P	653354	armadillo repeat containing X-linked 7, pseudogene	5.54007	0.0020539
ARPP19	10776	cAMP regulated phosphoprotein 19	-0.430397	0.0308953
ARSB	411	arylsulfatase B	-0.426377	0.0152412
ASAP3	55616	ArfGAP with SH3 domain, ankyrin repeat and PH domain 3	-0.535011	0.0382583
ASF1B	55723	anti-silencing function 1B histone chaperone	-0.981077	0.0193364
ASH1L	55870	ASH1 like histone lysine methyltransferase	-0.55698	0.0165353
ASPHD1	253982	aspartate beta-hydroxylase domain containing 1	0.64886	0.0125508
ASPM	259266	abnormal spindle microtubule assembly	-0.788647	0.0423633
ASXL1	171023	ASXL transcriptional regulator 1	-0.38089	0.0235263
ATAD2B	54454	ATPase family AAA domain containing 2B	-1.11509	0.000867311
ATIC	471	5-aminoimidazole-4-carboxamide ribonucleotide formyltransferase/IMP cyclohydrolase	0.518547	0.0229867
ATP5F1D	513	ATP synthase F1 subunit delta	0.573612	0.0172355
ATP6V1H	51606	ATPase H+ transporting V1 subunit H	0.431342	0.00470602
ATP7B	540	ATPase copper transporting beta	1.79348	0.000812196
ATP8B2	57198	ATPase phospholipid transporting 8B2	-0.469377	0.00313046
ATPSCKMT	134145	ATP synthase c subunit lysine N-methyltransferase	-0.498334	0.0474742
ATR	545	ATR serine/threonine kinase	0.569793	0.0200581
ATXN7L3B	552889	ataxin 7 like 3B	-0.390349	0.0361491
AURKB	9212	aurora kinase B	-0.868281	0.039042
AXIN2	8313	axin 2	-0.931775	0.0100286
BARD1	580	BRCA1 associated RING domain 1	-2.15095	0.0047725
BAZ1A	11177	bromodomain adjacent to zinc finger domain 1A	0.392486	0.0200883
BAZ2B	29994	bromodomain adjacent to zinc finger domain 2B	0.850826	0.0292709
BBC3	27113	BCL2 binding component 3	0.475961	0.0223431
BBS7	55212	Bardet-Biedl syndrome 7	-0.39094	0.0221195
BBX	56987	BBX high mobility group box domain containing	0.823997	0.00359372
BCAS3	54828	BCAS3 microtubule associated cell migration factor	0.713259	0.0415983
BCL9L	283149	BCL9 like	-0.526825	0.0360242
BCLAF1	9774	BCL2 associated transcription factor 1	-0.511174	0.00214335
BDKRB2	624	bradykinin receptor B2	0.674115	0.00236262
BEND6	221336	BEN domain containing 6	-0.3619	0.0433961
BEST1	7439	bestrophin 1	-0.580533	0.0488833
BIN1	274	bridging integrator 1	0.517376	0.0188779
BORCS6	54785	BLOC-1 related complex subunit 6	0.409823	0.0156687
BSCL2	26580	BSCL2 lipid droplet biogenesis associated, seipin	0.509808	0.0387937
BST2	684	bone marrow stromal cell antigen 2	0.997085	0.00688101
C15orf48	84419	chromosome 15 open reading frame 48	0.718551	0.0340713
C16orf87	388272	chromosome 16 open reading frame 87	-0.623521	0.0156412
C16orf95	100506581	chromosome 16 open reading frame 95	0.689855	0.0367054
C1orf122	127687	chromosome 1 open reading frame 122	0.508179	0.00633806
C1orf35	79169	chromosome 1 open reading frame 35	0.608896	0.00880431
C1orf52	148423	chromosome 1 open reading frame 52	-0.347183	0.0471509
C21orf62	56245	chromosome 21 open reading frame 62	1.3202	0.0150359
C2CD5	9847	C2 calcium dependent domain containing 5	-0.76251	0.00679069
C2orf68	388969	chromosome 2 open reading frame 68	0.702473	0.00143759
C4orf48	401115	chromosome 4 open reading frame 48	0.609716	0.0184633
C5orf63	401207	chromosome 5 open reading frame 63	0.992085	0.0356923
C7orf50	84310	chromosome 7 open reading frame 50	0.387	0.0359282
C8orf82	414919	chromosome 8 open reading frame 82	0.482353	0.0129952
CA5B	11238	carbonic anhydrase 5B	-0.509632	0.0494977
CA9	768	carbonic anhydrase 9	1.15798	0.0276252
CABLES2	81928	Cdk5 and Abl enzyme substrate 2	-0.730588	0.0176444
CALHM6	441168	calcium homeostasis modulator family member 6	1.14169	0.0154905
CALM2	805	calmodulin 2	-0.388439	0.0315077
CAMK2D	817	calcium/calmodulin dependent protein kinase II delta	-0.428553	0.0439913
CAMK2N1	55450	calcium/calmodulin dependent protein kinase II inhibitor 1	0.368481	0.0314224
CAMK2N2	94032	calcium/calmodulin dependent protein kinase II inhibitor 2	0.772421	0.0400065
CAPZA2	830	capping actin protein of muscle Z-line subunit alpha 2	-0.456978	0.0229056
CARD19	84270	caspase recruitment domain family member 19	0.294836	0.0383048
CASP2	835	caspase 2	-0.390821	0.0391344
CASP8AP2	9994	caspase 8 associated protein 2	-0.607955	0.0477624
CBX1	10951	chromobox 1	-0.271795	0.0372325
CC2D1B	200014	coiled-coil and C2 domain containing 1B	0.611197	0.0431454
CCDC102A	92922	coiled-coil domain containing 102A	0.539168	0.0302561
CCDC107	203260	coiled-coil domain containing 107	0.429674	0.0188226
CCDC112	153733	coiled-coil domain containing 112	0.758349	0.00237218
CCDC15	80071	coiled-coil domain containing 15	-0.991412	0.0395284
CCDC186	55088	coiled-coil domain containing 186	-0.681659	0.0283278
CCDC25	55246	coiled-coil domain containing 25	0.405711	0.0053622
CCDC71L	168455	coiled-coil domain containing 71 like	0.53389	0.0152441
CCDC85B	11007	coiled-coil domain containing 85B	0.782281	0.0199524
CCDC91	55297	coiled-coil domain containing 91	0.37793	0.0451133
CCM2	83605	CCM2 scaffold protein	0.337144	0.0128492
CCNA2	890	cyclin A2	-1.16527	0.015047
CCNY	219771	cyclin Y	-0.460999	0.00131282
CCS	9973	copper chaperone for superoxide dismutase	0.53032	0.00364926
CCZ1	51622	CCZ1 homolog, vacuolar protein trafficking and biogenesis associated	0.386896	0.012374
CD274	29126	CD274 molecule	-0.480517	0.0464575
CDC25A	993	cell division cycle 25A	-0.850113	0.00881353
CDC42BPB	9578	CDC42 binding protein kinase beta	-0.330331	0.0326202
CDCA5	113130	cell division cycle associated 5	-0.70424	0.0405497
CDCA7L	55536	cell division cycle associated 7 like	-0.961276	0.00610433
CDH13	1012	cadherin 13	-0.686187	0.0256998
CDK11B	984	cyclin dependent kinase 11B	0.451178	0.0145541
CDK12	51755	cyclin dependent kinase 12	-0.559371	0.0221785
CELF1	10658	CUGBP Elav-like family member 1	0.612421	0.0010204
CENPC	1060	centromere protein C	-0.748005	0.00766171
CENPQ	55166	centromere protein Q	-0.639187	0.0257097
CEP126	57562	centrosomal protein 126	-1.04359	0.0283863
CEP44	80817	centrosomal protein 44	-0.52201	0.0413973
CEP55	55165	centrosomal protein 55	-0.993889	0.0128141
CEP85	64793	centrosomal protein 85	-0.641789	0.00992679
CERS1	10715	ceramide synthase 1	0.499847	0.0393026
CFH	3075	complement factor H	-0.396394	0.0198591
CHAC2	494143	ChaC cation transport regulator homolog 2	-1.0103	0.0261895
CHCHD5	84269	coiled-coil-helix-coiled-coil-helix domain containing 5	0.386627	0.0497434
CHD2	1106	chromodomain helicase DNA binding protein 2	0.635175	0.0358657
CHD4	1108	chromodomain helicase DNA binding protein 4	0.663143	0.00332181
CHKB	1120	choline kinase beta	0.876678	0.00548779
CHMP1B	57132	charged multivesicular body protein 1B	-0.328337	0.0338114
CHRNA9	55584	cholinergic receptor nicotinic alpha 9 subunit	0.99638	0.00392265
CKB	1152	creatine kinase B	0.522545	0.0337268
CLASP2	23122	cytoplasmic linker associated protein 2	-0.429502	0.0373499
CLCN4	1183	chloride voltage-gated channel 4	-0.814506	0.0323477
CLPP	8192	caseinolytic mitochondrial matrix peptidase proteolytic subunit	0.377584	0.0180664
CLPX	10845	caseinolytic mitochondrial matrix peptidase chaperone subunit	-0.4368	0.0321201
CMPK2	129607	cytidine/uridine monophosphate kinase 2	1.2753	0.00867129
COG4	25839	component of oligomeric golgi complex 4	-0.3206	0.0387524
COL6A3	1293	collagen type VI alpha 3 chain	-0.464451	0.0345177
COLGALT2	23127	collagen beta(1-O)galactosyltransferase 2	-0.996937	0.0111624
COMMD6	170622	COMM domain containing 6	0.554769	0.0341591
COPZ1	22818	coatomer protein complex subunit zeta 1	-0.339717	0.0115349
COX6C	1345	cytochrome c oxidase subunit 6C	0.589585	0.0371826
CPSF1	29894	cleavage and polyadenylation specific factor 1	0.602992	0.0189866
CPSF2	53981	cleavage and polyadenylation specific factor 2	-0.571309	0.00487212
CRACD	57482	capping protein inhibiting regulator of actin dynamics	-1.20985	0.0127943
CRAT	1384	carnitine O-acetyltransferase	0.323565	0.0349794
CRIM1	51232	cysteine rich transmembrane BMP regulator 1	-0.372196	0.0401551
CRIPT	9419	CXXC repeat containing interactor of PDZ3 domain	0.292073	0.0435135
CRY1	1407	cryptochrome circadian regulator 1	-0.343323	0.0419711
CRYBG1	202	crystallin beta-gamma domain containing 1	-0.848635	0.00269722
CRYZL1	9946	crystallin zeta like 1	0.377623	0.0215828
CSPP1	79848	centrosome and spindle pole associated protein 1	0.516224	0.0205735
CSTF2	1478	cleavage stimulation factor subunit 2	-0.75503	0.000711024
CTNNBL1	56259	catenin beta like 1	0.50061	0.00651681
CTNND1	1500	catenin delta 1	-0.291363	0.0415848
CTSL	1514	cathepsin L	0.379689	0.00826765
CTU1	90353	cytosolic thiouridylase subunit 1	0.616822	0.00246728
CUL9	23113	cullin 9	1.06194	0.021254
CWC22	57703	CWC22 spliceosome associated protein homolog	-0.449524	0.0335221
CWC27	10283	CWC27 spliceosome associated cyclophilin	0.261333	0.0449139
CYB5B	80777	cytochrome b5 type B	-0.373497	0.0178607
CYFIP2	26999	cytoplasmic FMR1 interacting protein 2	0.807286	0.0314556
CYHR1	50626	cysteine and histidine rich 1	0.381974	0.028712
DAB2IP	153090	DAB2 interacting protein	-0.468111	0.0437895
DACT3	147906	dishevelled binding antagonist of beta catenin 3	0.523337	0.0225971
DAG1	1605	dystroglycan 1	-0.323134	0.0187532
DAGLA	747	diacylglycerol lipase alpha	-0.695276	0.0204315
DAPK3	1613	death associated protein kinase 3	0.355168	0.00775296
DARS1	1615	aspartyl-tRNA synthetase 1	0.651599	0.00048439
DAW1	164781	dynein assembly factor with WD repeats 1	-0.858847	0.0277753
DCLRE1A	9937	DNA cross-link repair 1A	-0.804992	0.0158756
DCP1A	55802	decapping mRNA 1A	0.54656	0.0104273
DCP2	167227	decapping mRNA 2	0.453065	0.0313809
DDIAS	220042	DNA damage induced apoptosis suppressor	-1.23867	0.037471
DDOST	1650	dolichyl-diphosphooligosaccharide--protein glycosyltransferase non-catalytic subunit	-0.274929	0.0387008
DDX46	9879	DEAD-box helicase 46	0.523867	0.000830917
DDX51	317781	DEAD-box helicase 51	0.608792	0.0409195
DEPDC1	55635	DEP domain containing 1	-1.12556	0.0133392
DEPP1	11067	DEPP1 autophagy regulator	0.639767	0.0386575
DGCR6L	85359	DiGeorge syndrome critical region gene 6 like	0.437082	0.0104972
DHDDS	79947	dehydrodolichyl diphosphate synthase subunit	-0.391662	0.0251398
DHFR	1719	dihydrofolate reductase	-0.766659	0.0191768
DHRS13	147015	dehydrogenase/reductase 13	0.725888	0.0234889
DHRS3	9249	dehydrogenase/reductase 3	0.81985	0.0275461
DHRS4	10901	dehydrogenase/reductase 4	0.438732	0.00674093
DHRS4L2	317749	dehydrogenase/reductase 4 like 2	0.78397	0.00383016
DHX58	79132	DExH-box helicase 58	0.997079	0.000531956
DIDO1	11083	death inducer-obliterator 1	-0.418421	0.0280122
DIXDC1	85458	DIX domain containing 1	-0.507897	0.0289466
DKK1	22943	dickkopf WNT signaling pathway inhibitor 1	-0.993665	0.0244981
DLC1	10395	DLC1 Rho GTPase activating protein	-0.709866	0.00125384
DLG3	1741	discs large MAGUK scaffold protein 3	-0.553392	0.046625
DLGAP5	9787	DLG associated protein 5	-0.99262	0.0156019
DNAJB4	11080	DnaJ heat shock protein family (Hsp40) member B4	-0.596562	0.00388113
DNAJC24	120526	DnaJ heat shock protein family (Hsp40) member C24	-0.541711	0.0202027
DNAJC7	7266	DnaJ heat shock protein family (Hsp40) member C7	0.564134	0.00518653
DNLZ	728489	DNL-type zinc finger	0.571834	0.0164416
DNM1	1759	dynamin 1	-0.993389	0.0188455
DNPEP	23549	aspartyl aminopeptidase	0.329661	0.0164554
DOCK10	55619	dedicator of cytokinesis 10	-0.641065	0.012763
DOCK6	57572	dedicator of cytokinesis 6	0.56904	0.0330506
DOP1A	23033	DOP1 leucine zipper like protein A	-0.916655	0.0490933
DPP7	29952	dipeptidyl peptidase 7	0.434506	0.0149049
DRAXIN	374946	dorsal inhibitory axon guidance protein	0.910472	0.0317812
DSP	1832	desmoplakin	-0.388667	0.0444834
DTL	51514	denticleless E3 ubiquitin protein ligase homolog	-0.811385	0.0345015
DTX2	113878	deltex E3 ubiquitin ligase 2	0.42899	0.0392062
DUSP19	142679	dual specificity phosphatase 19	-1.13483	0.0170488
DUXAP9	503638	double homeobox A pseudogene 9	0.854284	0.0369246
DYNC1LI2	1783	dynein cytoplasmic 1 light intermediate chain 2	-0.314359	0.0239218
DYNC2H1	79659	dynein cytoplasmic 2 heavy chain 1	0.644731	0.0138731
DYRK1A	1859	dual specificity tyrosine phosphorylation regulated kinase 1A	-0.34856	0.0250876
ECE1	1889	endothelin converting enzyme 1	-0.302022	0.0484721
ECI1	1632	enoyl-CoA delta isomerase 1	0.383999	0.027782
ECT2	1894	epithelial cell transforming 2	-0.603822	0.00325814
EEF1A2	1917	eukaryotic translation elongation factor 1 alpha 2	0.78491	0.0127417
EEF2	1938	eukaryotic translation elongation factor 2	0.406155	0.0243726
EGLN2	112398	egl-9 family hypoxia inducible factor 2	0.382061	0.0259757
EHBP1L1	254102	EH domain binding protein 1 like 1	0.723203	0.0135197
EHHADH	1962	enoyl-CoA hydratase and 3-hydroxyacyl CoA dehydrogenase	-0.899133	0.0161443
EIF2AK1	27102	eukaryotic translation initiation factor 2 alpha kinase 1	-0.513983	0.0136291
EIF2B4	8890	eukaryotic translation initiation factor 2B subunit delta	0.45553	0.00253598
EIF2S1	1965	eukaryotic translation initiation factor 2 subunit alpha	-0.373242	0.0362817
EIF2S2	8894	eukaryotic translation initiation factor 2 subunit beta	0.369811	0.0106148
EIF3C	8663	eukaryotic translation initiation factor 3 subunit C	0.338218	0.0476808
EIF3G	8666	eukaryotic translation initiation factor 3 subunit G	0.29435	0.0346674
EIF3J-DT	645212	EIF3J divergent transcript	0.63739	0.0273315
EIF3L	51386	eukaryotic translation initiation factor 3 subunit L	0.59301	0.00646223
EIF4E	1977	eukaryotic translation initiation factor 4E	-0.431794	0.0472689
EIF4G3	8672	eukaryotic translation initiation factor 4 gamma 3	-0.467489	0.0139198
EIF5A2	56648	eukaryotic translation initiation factor 5A2	-0.849549	0.00229758
EMILIN2	84034	elastin microfibril interfacer 2	0.58709	0.00628753
EN1	2019	engrailed homeobox 1	0.742356	0.011457
ENAH	55740	ENAH actin regulator	-0.462708	0.0219032
ENDOG	2021	endonuclease G	0.645124	0.0179921
ENOX2	10495	ecto-NOX disulfide-thiol exchanger 2	-0.476612	0.0426608
EPHA5	2044	EPH receptor A5	-1.09609	0.00298402
EPM2AIP1	9852	EPM2A interacting protein 1	-0.517621	0.0410256
ERBB2	2064	erb-b2 receptor tyrosine kinase 2	-0.58227	0.0121065
ERC1	23085	ELKS/RAB6-interacting/CAST family member 1	-0.431655	0.0289274
ERCC2	2068	ERCC excision repair 2, TFIIH core complex helicase subunit	-0.46954	0.0250367
ERI2	112479	ERI1 exoribonuclease family member 2	-0.902398	0.00179148
ERLIN2	11160	ER lipid raft associated 2	-0.40521	0.023549
EVA1B	55194	eva-1 homolog B	0.589182	0.00832127
EXD3	54932	exonuclease 3'-5' domain containing 3	0.476889	0.0362182
EXOSC4	54512	exosome component 4	0.448815	0.0302981
EXT2	2132	exostosin glycosyltransferase 2	-0.28774	0.0496747
EXTL3	2137	exostosin like glycosyltransferase 3	-0.378995	0.0256323
F2RL1	2150	F2R like trypsin receptor 1	0.535425	0.0250181
FAM111A	63901	family with sequence similarity 111 member A	-0.552735	0.0201571
FAM111A-DT	101927204	FAM111A divergent transcript	-0.926316	0.0242349
FAM111B	374393	family with sequence similarity 111 member B	-1.86301	0.0143305
FAM118B	79607	family with sequence similarity 118 member B	-0.38375	0.0312477
FAM120B	84498	family with sequence similarity 120B	-0.38884	0.0437959
FAM174C	55009	family with sequence similarity 174 member C	0.500496	0.00796106
FAM198B-AS1	285505	FAM198B antisense RNA 1	-1.29562	0.0126844
FAM207A	85395	family with sequence similarity 207 member A	0.464188	0.0109935
FAM20C	56975	FAM20C golgi associated secretory pathway kinase	0.563408	0.017417
FAM3A	60343	family with sequence similarity 3 member A	0.266241	0.0387212
FAM50A	9130	family with sequence similarity 50 member A	0.351759	0.0172137
FAM83D	81610	family with sequence similarity 83 member D	-1.02107	0.0240624
FAM98A	25940	family with sequence similarity 98 member A	-0.463553	0.0411826
FANCB	2187	FA complementation group B	-1.53666	0.014737
FANCD2	2177	FA complementation group D2	-1.07687	0.0458725
FAR1	84188	fatty acyl-CoA reductase 1	-0.460503	0.0224561
FBLN1	2192	fibulin 1	-0.327312	0.0434469
FBXL2	25827	F-box and leucine rich repeat protein 2	-0.905719	0.019688
FBXL8	55336	F-box and leucine rich repeat protein 8	0.506201	0.0323933
FBXW4	6468	F-box and WD repeat domain containing 4	-0.555415	0.00171426
FERMT1	55612	fermitin family member 1	-0.633927	0.0088665
FGD6	55785	FYVE, RhoGEF and PH domain containing 6	-0.666705	0.0298224
FGFR1OP2	26127	FGFR1 oncogene partner 2	-0.296665	0.0375325
FHOD1	29109	formin homology 2 domain containing 1	0.53669	0.047428
FKBP14	55033	FKBP prolyl isomerase 14	-0.37174	0.0223336
FKBP2	2286	FKBP prolyl isomerase 2	0.460823	0.0433502
FKBP5	2289	FKBP prolyl isomerase 5	-0.685449	0.0477728
FKBPL	63943	FKBP prolyl isomerase like	0.651427	0.00243724
FKTN	2218	fukutin	-0.519765	0.042106
FLVCR2	55640	feline leukemia virus subgroup C cellular receptor family member 2	0.870835	0.0112826
FMN1	342184	formin 1	-0.983315	0.026977
FOXM1	2305	forkhead box M1	-0.623726	0.0421913
FOXO3B	2310	forkhead box O3B	-0.925984	0.0311831
FOXRED2	80020	FAD dependent oxidoreductase domain containing 2	-0.697941	0.0120645
FRMD4A	55691	FERM domain containing 4A	-0.553271	0.0129124
FSIP2	401024	fibrous sheath interacting protein 2	0.64321	0.0441456
FTH1	2495	ferritin heavy chain 1	0.416054	0.0153393
FXYD6	53826	FXYD domain containing ion transport regulator 6	0.942508	0.0373302
FZD6	8323	frizzled class receptor 6	-0.555872	0.0181738
G2E3	55632	G2/M-phase specific E3 ubiquitin protein ligase	-0.527937	0.0173577
G3BP1	10146	G3BP stress granule assembly factor 1	-0.469517	0.0166949
GABRG2	2566	gamma-aminobutyric acid type A receptor gamma2 subunit	0.713752	0.0115246
GALNT10	55568	polypeptide N-acetylgalactosaminyltransferase 10	-0.345099	0.0100853
GALNT11	63917	polypeptide N-acetylgalactosaminyltransferase 11	-0.386883	0.0110865
GALNT6	11226	polypeptide N-acetylgalactosaminyltransferase 6	-0.607525	0.032115
GAS7	8522	growth arrest specific 7	-0.950421	0.0341668
GATAD1	57798	GATA zinc finger domain containing 1	0.342998	0.0390561
GCAT	23464	glycine C-acetyltransferase	0.393286	0.0223882
GDF11	10220	growth differentiation factor 11	-0.525267	0.0094256
GDF6	392255	growth differentiation factor 6	-1.13185	0.0338334
GDPD5	81544	glycerophosphodiester phosphodiesterase domain containing 5	0.765112	0.0167945
GIN1	54826	gypsy retrotransposon integrase 1	0.867028	0.00928657
GIT2	9815	GIT ArfGAP 2	-0.354896	0.0164246
GLI2	2736	GLI family zinc finger 2	-0.870962	0.0104333
GLI3	2737	GLI family zinc finger 3	0.771486	0.00729337
GLIPR1	11010	GLI pathogenesis related 1	-0.582331	0.023125
GLYR1	84656	glyoxylate reductase 1 homolog	-0.388046	0.0466506
GNG5	2787	G protein subunit gamma 5	0.344999	0.0313371
GOLGA1	2800	golgin A1	-0.52419	0.0276196
GOLGA8B	440270	golgin A8 family member B	-1.25436	0.0243538
GPAT2P1	643219	glycerol-3-phosphate acyltransferase 2 pseudogene 1	-2.17758	0.00804815
GPR89B	51463	G protein-coupled receptor 89B	-0.60954	0.0226689
GPRIN1	114787	G protein regulated inducer of neurite outgrowth 1	0.442875	0.0264448
GPX4	2879	glutathione peroxidase 4	0.385644	0.0311321
GRIN2D	2906	glutamate ionotropic receptor NMDA type subunit 2D	0.532027	0.0275159
GSTO1	9446	glutathione S-transferase omega 1	0.269105	0.0490115
GTF2IRD1	9569	GTF2I repeat domain containing 1	0.721541	0.00705398
GTF2IRD2B	389524	GTF2I repeat domain containing 2B	0.490878	0.0274895
H2AJ	55766	H2A.J histone	0.368029	0.0249615
H2BC19P	337874	H2B clustered histone 19, pseudogene	1.16668	0.0371263
H2BC8	8339	H2B clustered histone 8	0.501689	0.0282625
HACD2	201562	3-hydroxyacyl-CoA dehydratase 2	-0.329287	0.0483971
HAGH	3029	hydroxyacylglutathione hydrolase	0.270458	0.0338423
HASPIN	83903	histone H3 associated protein kinase	-1.01714	0.033037
HBS1L	10767	HBS1 like translational GTPase	-0.316076	0.0302008
HEBP2	23593	heme binding protein 2	0.310267	0.0227738
HEG1	57493	heart development protein with EGF like domains 1	-0.5239	0.0160544
HELLPAR	101101692	HELLP associated long non-coding RNA	0.510983	0.0458508
HELZ2	85441	helicase with zinc finger 2	0.55784	0.0345289
HEXB	3074	hexosaminidase subunit beta	0.447327	0.0106976
HEXD	284004	hexosaminidase D	0.820201	0.00355963
HMG20A	10363	high mobility group 20A	-0.375103	0.0212638
HMGB1P5	10354	high mobility group box 1 pseudogene 5	-1.10484	0.0383744
HMGB1P6	645292	high mobility group box 1 pseudogene 6	0.741873	0.0181247
HNRNPH3	3189	heterogeneous nuclear ribonucleoprotein H3	-0.261859	0.0410964
HNRNPL	3191	heterogeneous nuclear ribonucleoprotein L	-0.300125	0.0426271
HOMER1	9456	homer scaffold protein 1	0.588717	0.00765357
HOMER3	9454	homer scaffold protein 3	0.488128	0.000775978
HP1BP3	50809	heterochromatin protein 1 binding protein 3	-0.740686	0.000252065
HPCAL1	3241	hippocalcin like 1	0.431742	0.0451747
HSP90AA1	3320	heat shock protein 90 alpha family class A member 1	0.449649	0.00966499
HSPA4L	22824	heat shock protein family A (Hsp70) member 4 like	-0.885337	0.0063199
HTRA3	94031	HtrA serine peptidase 3	0.531898	0.00665243
HVCN1	84329	hydrogen voltage gated channel 1	-0.741991	0.0276943
HYOU1	10525	hypoxia up-regulated 1	-0.32609	0.0157798
ICA1L	130026	islet cell autoantigen 1 like	-0.966614	0.0237081
ICOSLG	23308	inducible T cell costimulator ligand	0.784095	0.0131036
IFI6	2537	interferon alpha inducible protein 6	0.835434	0.0110139
IFIT3	3437	interferon induced protein with tetratricopeptide repeats 3	0.930655	0.0125204
IFITM1	8519	interferon induced transmembrane protein 1	1.4812	0.00758989
IFNE	338376	interferon epsilon	-0.756006	0.0444407
IGF2BP3	10643	insulin like growth factor 2 mRNA binding protein 3	-0.615387	0.0464138
IL17RC	84818	interleukin 17 receptor C	0.31757	0.0381817
IMP3	55272	IMP U3 small nucleolar ribonucleoprotein 3	0.283386	0.0455246
IMPA1	3612	inositol monophosphatase 1	-0.478527	0.0204014
INAFM1	255783	InaF motif containing 1	0.614311	0.0234867
INCENP	3619	inner centromere protein	-1.00045	0.00473751
INHBA	3624	inhibin subunit beta A	0.592689	0.0433498
INIP	58493	INTS3 and NABP interacting protein	-0.540089	0.00682592
INO80D	54891	INO80 complex subunit D	-0.464471	0.0237035
INPP5B	3633	inositol polyphosphate-5-phosphatase B	0.601646	0.0195528
INTS13	55726	integrator complex subunit 13	0.258275	0.0453537
INTS4	92105	integrator complex subunit 4	0.342831	0.0319274
INTS8	55656	integrator complex subunit 8	-0.383665	0.0275729
IPO9	55705	importin 9	-0.923329	0.00174566
IQCE	23288	IQ motif containing E	-0.465491	0.0257607
IQGAP3	128239	IQ motif containing GTPase activating protein 3	-1.13707	0.00161193
IRF7	3665	interferon regulatory factor 7	0.811444	0.00199096
IRS1	3667	insulin receptor substrate 1	-0.693958	0.0495478
ISG15	9636	ISG15 ubiquitin like modifier	1.32439	7.55575e-05
ISG20	3669	interferon stimulated exonuclease gene 20	0.679724	0.0221031
ISL2	64843	ISL LIM homeobox 2	0.958521	0.0232345
ITGA6	3655	integrin subunit alpha 6	-0.414277	0.0425361
ITPR3	3710	inositol 1,4,5-trisphosphate receptor type 3	-0.511309	0.00192893
ITSN1	6453	intersectin 1	-0.388321	0.0302978
JADE2	23338	jade family PHD finger 2	-0.518426	0.0246482
JAK2	3717	Janus kinase 2	-0.454976	0.0400901
JOSD2	126119	Josephin domain containing 2	0.424194	0.0273913
JUND	3727	JunD proto-oncogene, AP-1 transcription factor subunit	0.364666	0.029466
KANK1	23189	KN motif and ankyrin repeat domains 1	-0.56891	0.00529277
KCNJ2	3759	potassium inwardly rectifying channel subfamily J member 2	-0.856223	0.0380714
KDM5A	5927	lysine demethylase 5A	0.435164	0.0373788
KDM5C	8242	lysine demethylase 5C	-0.378579	0.0292161
KEAP1	9817	kelch like ECH associated protein 1	0.300105	0.0461973
KHDRBS3	10656	KH RNA binding domain containing, signal transduction associated 3	0.750591	0.00316472
KIAA0232	9778	KIAA0232	-0.56612	0.00111982
KIAA0895L	653319	KIAA0895 like	0.858882	0.0201845
KIAA1109	84162	KIAA1109	-0.46489	0.0242528
KIAA1328	57536	KIAA1328	0.839912	0.00215488
KIAA1671	85379	KIAA1671	-1.2801	0.00213964
KIF11	3832	kinesin family member 11	-0.91276	0.0192904
KIF14	9928	kinesin family member 14	-0.944708	0.0364003
KIF18A	81930	kinesin family member 18A	-1.29688	0.0218726
KIF18B	146909	kinesin family member 18B	-1.75315	0.0245089
KIF24	347240	kinesin family member 24	-1.59891	0.014258
KIF26B	55083	kinesin family member 26B	-1.04772	0.0112731
KIF4A	24137	kinesin family member 4A	-1.13118	0.0185288
KIFC1	3833	kinesin family member C1	-1.12007	0.0304707
KLF13	51621	Kruppel like factor 13	0.620668	0.0123922
KLF6	1316	Kruppel like factor 6	0.402216	0.0320841
KLHDC8B	200942	kelch domain containing 8B	0.565056	0.00232113
KLHL20	27252	kelch like family member 20	-0.637304	0.0190465
KMT2E	55904	lysine methyltransferase 2E	0.631751	0.00997604
KNL1	57082	kinetochore scaffold 1	-1.17031	0.046399
KRBA1	84626	KRAB-A domain containing 1	-1.10625	0.0235884
LAMA1	284217	laminin subunit alpha 1	0.580379	0.0331092
LAMA2	3908	laminin subunit alpha 2	-0.535216	0.0222733
LAMC1	3915	laminin subunit gamma 1	-0.41757	0.00842414
LAMC2	3918	laminin subunit gamma 2	-0.476536	0.0295106
LAMTOR4	389541	late endosomal/lysosomal adaptor, MAPK and MTOR activator 4	0.477929	0.0407582
LDAH	60526	lipid droplet associated hydrolase	-0.535054	0.0145522
LIMA1	51474	LIM domain and actin binding 1	-0.454115	0.0203026
LIMCH1	22998	LIM and calponin homology domains 1	-0.602207	0.0383159
LIMK2	3985	LIM domain kinase 2	-0.46886	0.0215571
LIN37	55957	lin-37 DREAM MuvB core complex component	0.449685	0.03078
LIN52	91750	lin-52 DREAM MuvB core complex component	-0.537409	0.0220241
LINC00476	100128782	long intergenic non-protein coding RNA 476	1.11007	0.0062705
LINC00641	283624	long intergenic non-protein coding RNA 641	-0.886871	0.0263251
LINC00680	106660612	long intergenic non-protein coding RNA 680	-0.948	0.0420092
LINC00887	100131551	long intergenic non-protein coding RNA 887	1.28061	0.000457085
LINC01145	103091866	long intergenic non-protein coding RNA 1145	-0.537048	0.0499258
LINC01206	100996490	long intergenic non-protein coding RNA 1206	1.00922	0.0284026
LINC01521	54944	long intergenic non-protein coding RNA 1521	0.904363	0.0328942
LINC01551	387978	long intergenic non-protein coding RNA 1551	4.7294	0.000349505
LINC01588	283551	long intergenic non-protein coding RNA 1588	0.729091	0.0327444
LINC01828	102800447	long intergenic non-protein coding RNA 1828	0.915449	0.0147638
LINC01873	729348	long intergenic non-protein coding RNA 1873	1.12178	0.00350541
LRP5	4041	LDL receptor related protein 5	-0.442147	0.0288809
LRPPRC	10128	leucine rich pentatricopeptide repeat containing	0.304869	0.0475562
LRTOMT	220074	leucine rich transmembrane and O-methyltransferase domain containing	0.940967	0.031209
LTBP2	4053	latent transforming growth factor beta binding protein 2	-0.398981	0.0207573
LUC7L3	51747	LUC7 like 3 pre-mRNA splicing factor	0.510961	0.0235203
LY6E	4061	lymphocyte antigen 6 family member E	0.326606	0.0478955
LZTFL1	54585	leucine zipper transcription factor like 1	-0.386214	0.0303811
MAD1L1	8379	mitotic arrest deficient 1 like 1	0.70771	0.0266918
MAGED4	728239	MAGE family member D4	2.69765	0.00768489
MALAT1	378938	metastasis associated lung adenocarcinoma transcript 1	0.876728	0.0362121
MANSC1	54682	MANSC domain containing 1	-0.831745	0.00584028
MAP1LC3A	84557	microtubule associated protein 1 light chain 3 alpha	0.440171	0.0169689
MAPK11	5600	mitogen-activated protein kinase 11	0.674913	0.00789776
MAPK8IP1	9479	mitogen-activated protein kinase 8 interacting protein 1	0.463748	0.014479
MAPRE2	10982	microtubule associated protein RP/EB family member 2	-0.399161	0.0164033
MARCHF9	92979	membrane associated ring-CH-type finger 9	0.454557	0.0316451
MASTL	84930	microtubule associated serine/threonine kinase like	-0.409265	0.0123775
MBD2	8932	methyl-CpG binding domain protein 2	-0.355993	0.0497647
MBNL2	10150	muscleblind like splicing regulator 2	-0.494802	0.0124272
MCM2	4171	minichromosome maintenance complex component 2	-0.713614	0.0129
MCM6	4175	minichromosome maintenance complex component 6	-0.439195	0.00408095
MCOLN1	57192	mucolipin 1	0.468571	0.0114041
MCRIP1	348262	MAPK regulated corepressor interacting protein 1	0.320399	0.0296702
MCRIP2	84331	MAPK regulated corepressor interacting protein 2	0.39887	0.0482381
MED23	9439	mediator complex subunit 23	-0.344175	0.0483533
MEF2A	4205	myocyte enhancer factor 2A	-0.477227	0.0407859
MEG8	79104	maternally expressed 8, small nucleolar RNA host gene	0.699156	0.0158396
MEI1	150365	meiotic double-stranded break formation protein 1	0.824124	0.00992282
METAP2	10988	methionyl aminopeptidase 2	0.389131	0.00388364
METTL16	79066	methyltransferase like 16	0.526279	0.0100486
METTL23	124512	methyltransferase like 23	0.329217	0.020736
METTL2A	339175	methyltransferase like 2A	-0.40389	0.03415
MFSD12	126321	major facilitator superfamily domain containing 12	0.408484	0.00901739
MGA	23269	MAX dimerization protein MGA	-0.558503	0.029252
MIIP	60672	migration and invasion inhibitory protein	0.396694	0.0482041
MIR4458HG	100505738	MIR4458 host gene	0.793174	0.000854402
MLEC	9761	malectin	-0.323479	0.0132676
MMP17	4326	matrix metallopeptidase 17	0.653059	0.00138791
MMS19	64210	MMS19 homolog, cytosolic iron-sulfur assembly component	0.566453	0.00439548
MORF4L1	10933	mortality factor 4 like 1	-0.406393	0.0199132
MORF4L2	9643	mortality factor 4 like 2	-0.339931	0.0270376
MPG	4350	N-methylpurine DNA glycosylase	0.356003	0.0298148
MPHOSPH8	54737	M-phase phosphoprotein 8	0.674657	0.00548012
MPHOSPH9	10198	M-phase phosphoprotein 9	-0.553691	0.0476432
MPND	84954	MPN domain containing	0.63695	0.03949
MPST	4357	mercaptopyruvate sulfurtransferase	0.394466	0.0456945
MPZL3	196264	myelin protein zero like 3	-1.03361	0.0172512
MRAS	22808	muscle RAS oncogene homolog	-0.614421	0.00968983
MRPL23	6150	mitochondrial ribosomal protein L23	0.497561	0.036468
MRPS12	6183	mitochondrial ribosomal protein S12	0.394919	0.0458513
MRPS5	64969	mitochondrial ribosomal protein S5	0.370884	0.00657698
MSRB3	253827	methionine sulfoxide reductase B3	-0.564416	0.0048802
MT3	4504	metallothionein 3	0.978115	0.0255437
MTBP	27085	MDM2 binding protein	-1.20673	0.0415556
MTDH	92140	metadherin	0.453822	0.00852105
MTMR1	8776	myotubularin related protein 1	-0.447967	0.0188459
MTND2P28	100652939	MT-ND2 pseudogene 28	-1.50962	0.0149878
MTR	4548	5-methyltetrahydrofolate-homocysteine methyltransferase	-0.46308	0.0352203
MX1	4599	MX dynamin like GTPase 1	0.957628	0.0420649
MYBL1	4603	MYB proto-oncogene like 1	-1.71215	0.00149918
MYCBP	26292	MYC binding protein	0.654362	0.044613
MYO5A	4644	myosin VA	-0.602845	0.0148938
MYOF	26509	myoferlin	-0.450061	0.00350068
N6AMT1	29104	N-6 adenine-specific DNA methyltransferase 1	-0.485127	0.0309411
NAA40	79829	N(alpha)-acetyltransferase 40, NatD catalytic subunit	-0.478664	0.0346938
NADK2	133686	NAD kinase 2, mitochondrial	-0.414481	0.0111516
NAGA	4668	alpha-N-acetylgalactosaminidase	-0.378777	0.040295
NAGS	162417	N-acetylglutamate synthase	0.731233	0.013265
NASP	4678	nuclear autoantigenic sperm protein	-0.381019	0.0152861
NCAPD2	9918	non-SMC condensin I complex subunit D2	-0.527706	0.0025805
NCAPD3	23310	non-SMC condensin II complex subunit D3	-0.658581	0.0180648
NDC1	55706	NDC1 transmembrane nucleoporin	-0.381366	0.0492143
NDUFA13	51079	NADH:ubiquinone oxidoreductase subunit A13	0.554374	0.0209519
NDUFB1	4707	NADH:ubiquinone oxidoreductase subunit B1	0.551886	0.0381928
NDUFV1	4723	NADH:ubiquinone oxidoreductase core subunit V1	0.415622	0.0272415
NECAB3	63941	N-terminal EF-hand calcium binding protein 3	0.377755	0.0228485
NEMF	9147	nuclear export mediator factor	0.538612	0.0181153
NEU3	10825	neuraminidase 3	-0.834506	0.00103335
NFAT5	10725	nuclear factor of activated T cells 5	-0.493586	0.0428207
NFATC4	4776	nuclear factor of activated T cells 4	1.13587	0.00169706
NFIX	4784	nuclear factor I X	-0.469946	0.00304725
NFKBIL1	4795	NFKB inhibitor like 1	0.38628	0.0440839
NFYA	4800	nuclear transcription factor Y subunit alpha	-0.37305	0.0390541
NHSL1	57224	NHS like 1	-0.849398	0.0213724
NKAP	79576	NFKB activating protein	0.354855	0.040518
NKAPD1	55216	NKAP domain containing 1	0.439473	0.00290832
NKAPL	222698	NFKB activating protein like	0.75661	0.026675
NLGN4Y	22829	neuroligin 4 Y-linked	-0.792475	0.0137748
NME1-NME2	654364	NME1-NME2 readthrough	-0.68584	0.015824
NMNAT2	23057	nicotinamide nucleotide adenylyltransferase 2	-0.515052	0.0444413
NMT1	4836	N-myristoyltransferase 1	0.897026	0.00193573
NNT-AS1	100652772	NNT antisense RNA 1	0.33673	0.0291711
NOD1	10392	nucleotide binding oligomerization domain containing 1	-0.948659	0.0133485
NOL3	8996	nucleolar protein 3	0.729894	0.00401643
NOMO3	408050	NODAL modulator 3	-0.563724	0.00548118
NOSIP	51070	nitric oxide synthase interacting protein	0.461659	0.00956386
NOTCH2NLC	100996717	notch 2 N-terminal like C	0.751749	0.0121988
NPDC1	56654	neural proliferation, differentiation and control 1	0.363658	0.0250117
NPEPL1	79716	aminopeptidase like 1	0.318805	0.0157272
NPR2	4882	natriuretic peptide receptor 2	0.541013	0.0239779
NPRL2	10641	NPR2 like, GATOR1 complex subunit	0.449879	0.0185748
NSD2	7468	nuclear receptor binding SET domain protein 2	-0.650094	0.00424496
NSRP1	84081	nuclear speckle splicing regulatory protein 1	0.564237	0.0141739
NTM	50863	neurotrimin	-0.559605	0.0464013
NUCKS1	64710	nuclear casein kinase and cyclin dependent kinase substrate 1	0.98564	0.00647714
NUDT15	55270	nudix hydrolase 15	-0.405332	0.0414746
NUDT4B	440672	nudix hydrolase 4B	-1.13949	0.0486651
NUP188	23511	nucleoporin 188	-0.409093	0.0470173
NUP205	23165	nucleoporin 205	0.486905	0.0277156
NXPE3	91775	neurexophilin and PC-esterase domain family member 3	-0.652387	0.0146536
NYAP1	222950	neuronal tyrosine phosphorylated phosphoinositide-3-kinase adaptor 1	-1.19536	0.00631783
OBSL1	23363	obscurin like cytoskeletal adaptor 1	0.60831	0.00240882
OFD1	8481	OFD1 centriole and centriolar satellite protein	0.481972	0.0459798
OGFOD1	55239	2-oxoglutarate and iron dependent oxygenase domain containing 1	-0.567573	0.0154529
OLMALINC	90271	oligodendrocyte maturation-associated long intergenic non-coding RNA	0.479643	0.0310226
ORAI1	84876	ORAI calcium release-activated calcium modulator 1	0.277433	0.047013
OSER1-DT	100505783	OSER1 divergent transcript	0.625917	0.0455018
OXCT1	5019	3-oxoacid CoA-transferase 1	-0.39307	0.0461202
OXLD1	339229	oxidoreductase like domain containing 1	0.471737	0.027951
PAICS	10606	phosphoribosylaminoimidazole carboxylase and phosphoribosylaminoimidazolesuccinocarboxamide synthase	-0.373714	0.0107227
PAIP1	10605	poly(A) binding protein interacting protein 1	0.294246	0.0142526
PARD3	56288	par-3 family cell polarity regulator	0.41236	0.0238035
PARL	55486	presenilin associated rhomboid like	0.363991	0.049309
PARP15	165631	poly(ADP-ribose) polymerase family member 15	0.732169	0.0329916
PBRM1	55193	polybromo 1	-0.456131	0.0431627
PCDHGA3	56112	protocadherin gamma subfamily A, 3	-1.18568	0.0294421
PCDHGA5	56110	protocadherin gamma subfamily A, 5	-0.584985	0.0294625
PCDHGB2	56103	protocadherin gamma subfamily B, 2	-0.667866	0.0103249
PCID2	55795	PCI domain containing 2	-0.327011	0.0357041
PCLAF	9768	PCNA clamp associated factor	-0.762865	0.0321224
PCSK1N	27344	proprotein convertase subtilisin/kexin type 1 inhibitor	1.26438	0.00850462
PDCD7	10081	programmed cell death 7	0.378538	0.0241437
PDE6A	5145	phosphodiesterase 6A	1.37327	0.000254338
PDPK1	5170	3-phosphoinositide dependent protein kinase 1	-0.485071	0.0214176
PFKM	5213	phosphofructokinase, muscle	-0.739196	0.000267213
PGGT1B	5229	protein geranylgeranyltransferase type I subunit beta	-0.781244	0.00197159
PHAX	51808	phosphorylated adaptor for RNA export	-0.591108	0.0254194
PHC1P1	653441	polyhomeotic homolog 1 pseudogene 1	-1.61435	0.023521
PHF14	9678	PHD finger protein 14	0.56058	0.00752991
PHF3	23469	PHD finger protein 3	-0.543666	0.0175649
PHKA2	5256	phosphorylase kinase regulatory subunit alpha 2	0.817868	0.011051
PIGG	54872	phosphatidylinositol glycan anchor biosynthesis class G	0.40211	0.0334838
PIGQ	9091	phosphatidylinositol glycan anchor biosynthesis class Q	0.352231	0.0309344
PIGX	54965	phosphatidylinositol glycan anchor biosynthesis class X	0.377069	0.0297737
PIK3C2A	5286	phosphatidylinositol-4-phosphate 3-kinase catalytic subunit type 2 alpha	-0.476613	0.0467841
PIP4K2A	5305	phosphatidylinositol-5-phosphate 4-kinase type 2 alpha	-0.470153	0.015277
PKN1	5585	protein kinase N1	0.303377	0.0224692
PKNOX2	63876	PBX/knotted 1 homeobox 2	-1.37382	0.0110215
PLA2G4C	8605	phospholipase A2 group IVC	0.870243	0.034305
PLEKHA4	57664	pleckstrin homology domain containing A4	0.580654	0.0240012
PLEKHH3	79990	pleckstrin homology, MyTH4 and FERM domain containing H3	0.509986	0.024347
PLEKHN1	84069	pleckstrin homology domain containing N1	0.698711	0.0133443
PLEKHO1	51177	pleckstrin homology domain containing O1	0.334027	0.0262812
PLXNA3	55558	plexin A3	-0.634856	0.00993755
PMEPA1	56937	prostate transmembrane protein, androgen induced 1	0.415774	0.0368099
PNN	5411	pinin, desmosome associated protein	-0.411305	0.0280497
PNPLA2	57104	patatin like phospholipase domain containing 2	0.466988	0.0088003
PNPLA6	10908	patatin like phospholipase domain containing 6	0.587709	0.0156879
POC1B-GALNT4	100528030	POC1B-GALNT4 readthrough	3.0279	0.0114687
POLR2J4	84820	RNA polymerase II subunit J4, pseudogene	-1.56989	0.0012791
POLR2M	81488	RNA polymerase II subunit M	-0.476523	0.0389936
POLR3B	55703	RNA polymerase III subunit B	-0.358554	0.0493924
POLRMT	5442	RNA polymerase mitochondrial	0.961175	0.000374671
PPIAP22	653214	peptidylprolyl isomerase A pseudogene 22	-3.33167	0.0137987
PPIP5K1	9677	diphosphoinositol pentakisphosphate kinase 1	-0.848122	0.012997
PPP1R12A	4659	protein phosphatase 1 regulatory subunit 12A	0.488715	0.0340283
PPP1R12C	54776	protein phosphatase 1 regulatory subunit 12C	0.302851	0.0464137
PPP1R15B	84919	protein phosphatase 1 regulatory subunit 15B	-0.360611	0.0188644
PPP1R35	221908	protein phosphatase 1 regulatory subunit 35	0.590151	0.010352
PRIM2	5558	DNA primase subunit 2	-0.591345	0.0462825
PRKAR2A	5576	protein kinase cAMP-dependent type II regulatory subunit alpha	0.35709	0.00624617
PRKCA	5578	protein kinase C alpha	-0.548017	0.0314511
PROB1	389333	proline rich basic protein 1	0.609169	0.0177415
PROSER1	80209	proline and serine rich 1	0.449102	0.0262904
PSMD10	5716	proteasome 26S subunit, non-ATPase 10	-0.371293	0.0230594
PSMD4	5710	proteasome 26S subunit, non-ATPase 4	0.270013	0.0319031
PSPC1	55269	paraspeckle component 1	0.350547	0.0244511
PTCD3	55037	pentatricopeptide repeat domain 3	-0.691502	0.0129635
PTDSS2	81490	phosphatidylserine synthase 2	0.293872	0.0263472
PTP4A2	8073	protein tyrosine phosphatase 4A2	0.433309	0.00910709
PTPN13	5783	protein tyrosine phosphatase non-receptor type 13	-0.651878	0.0147637
PTPRE	5791	protein tyrosine phosphatase receptor type E	0.979674	0.0212732
RAB13	5872	RAB13, member RAS oncogene family	0.498328	0.0247042
RAB23	51715	RAB23, member RAS oncogene family	-0.411729	0.0351391
RAB2B	84932	RAB2B, member RAS oncogene family	-0.526335	0.0315834
RAB33A	9363	RAB33A, member RAS oncogene family	0.663418	0.0395383
RABEP1	9135	rabaptin, RAB GTPase binding effector protein 1	-0.422191	0.0295446
RABL3	285282	RAB, member of RAS oncogene family like 3	-0.728908	0.0235432
RABL6	55684	RAB, member RAS oncogene family like 6	0.48565	0.0163918
RAC1	5879	Rac family small GTPase 1	0.3783	0.0150527
RAD51AP1	10635	RAD51 associated protein 1	-1.00122	0.0162153
RALA	5898	RAS like proto-oncogene A	0.301806	0.0452361
RALBP1	10928	ralA binding protein 1	0.449641	0.00482575
RANBP2	5903	RAN binding protein 2	-0.442199	0.0294063
RAPGEF1	2889	Rap guanine nucleotide exchange factor 1	-0.408545	0.0405996
RAPGEF2	9693	Rap guanine nucleotide exchange factor 2	-0.6552	0.0034918
RAPGEF6	51735	Rap guanine nucleotide exchange factor 6	-0.360094	0.0469858
RARA-AS1	101929693	RARA antisense RNA 1	0.818978	0.0145879
RASSF7	8045	Ras association domain family member 7	0.947283	0.0017284
RASSF9	9182	Ras association domain family member 9	-1.18003	0.0105286
RBFOX2	23543	RNA binding fox-1 homolog 2	-0.334648	0.0116933
RBM12B	389677	RNA binding motif protein 12B	-0.909993	0.00705839
RBM25	58517	RNA binding motif protein 25	0.452518	0.0375305
RBM27	54439	RNA binding motif protein 27	-0.353761	0.0499099
RBM6	10180	RNA binding motif protein 6	0.722498	0.0038552
RBMS3	27303	RNA binding motif single stranded interacting protein 3	-0.787951	0.0120808
RBMX2	51634	RNA binding motif protein X-linked 2	0.39807	0.0206273
REPS1	85021	RALBP1 associated Eps domain containing 1	0.470488	0.0060987
RFC1	5981	replication factor C subunit 1	-0.54902	0.0083774
RFC3	5983	replication factor C subunit 3	-0.789752	0.0114174
RFWD3	55159	ring finger and WD repeat domain 3	-0.552047	0.00628274
RFXANK	8625	regulatory factor X associated ankyrin containing protein	0.503862	0.0216843
RGL1	23179	ral guanine nucleotide dissociation stimulator like 1	-0.498933	0.0434856
RGPD8	727851	RANBP2 like and GRIP domain containing 8	-0.661992	0.00861966
RHOJ	57381	ras homolog family member J	-1.18596	0.0285298
RMC1	29919	regulator of MON1-CCZ1	0.418397	0.0426682
RMI1	80010	RecQ mediated genome instability 1	-0.573578	0.0122707
RN7SL731P	107048981	RNA, 7SL, cytoplasmic 731, pseudogene	6.10031	0.00091484
RNA5S1	100169751	RNA, 5S ribosomal 1	1.62969	0.00719718
RNASEK-C17orf49	100529209	RNASEK-C17orf49 readthrough	-2.10195	0.0154775
RNF135	84282	ring finger protein 135	0.504358	0.00220143
RNF144A	9781	ring finger protein 144A	0.911234	0.0151137
RNF185	91445	ring finger protein 185	-0.313043	0.0360953
RNF187	149603	ring finger protein 187	0.274677	0.0358667
RNF31	55072	ring finger protein 31	0.541251	0.00133696
RNPEPL1	57140	arginyl aminopeptidase like 1	0.346724	0.0277292
ROCK1	6093	Rho associated coiled-coil containing protein kinase 1	0.409088	0.0438091
RPA1	6117	replication protein A1	-0.494698	0.0446279
RPAIN	84268	RPA interacting protein	0.297046	0.0434155
RPL13	6137	ribosomal protein L13	0.392235	0.0216251
RPL13A	23521	ribosomal protein L13a	0.391178	0.0316066
RPL21P16	729402	ribosomal protein L21 pseudogene 16	1.75668	0.0128353
RPL23A	6147	ribosomal protein L23a	0.372588	0.0347884
RPL3P4	326307	ribosomal protein L3 pseudogene 4	6.70042	0.000345405
RPL5	6125	ribosomal protein L5	0.379244	0.0217677
RPL9	6133	ribosomal protein L9	0.877432	0.00195057
RPS6KB1	6198	ribosomal protein S6 kinase B1	-0.403128	0.0422791
RRAD	6236	RRAD, Ras related glycolysis inhibitor and calcium channel regulator	0.458515	0.0129622
RRAGD	58528	Ras related GTP binding D	0.847028	0.0396548
RRNAD1	51093	ribosomal RNA adenine dimethylase domain containing 1	0.391831	0.0371949
RRP8	23378	ribosomal RNA processing 8	-0.873531	0.00466469
RSBN1L	222194	round spermatid basic protein 1 like	0.370608	0.0466249
RSF1	51773	remodeling and spacing factor 1	0.747744	0.00977354
RSPRY1	89970	ring finger and SPRY domain containing 1	-0.363481	0.0165772
RTN2	6253	reticulon 2	0.452485	0.048434
RUNX1T1	862	RUNX1 partner transcriptional co-repressor 1	-1.06433	0.0334399
SAFB2	9667	scaffold attachment factor B2	0.524969	0.00997461
SALL2	6297	spalt like transcription factor 2	1.11445	0.0126148
SAMD9	54809	sterile alpha motif domain containing 9	-0.573239	0.0318498
SAMHD1	25939	SAM and HD domain containing deoxynucleoside triphosphate triphosphohydrolase 1	0.618427	0.00257631
SAP30L	79685	SAP30 like	0.496636	0.0323582
SART1	9092	spliceosome associated factor 1, recruiter of U4/U6.U5 tri-snRNP	0.518267	0.0277884
SASH1	23328	SAM and SH3 domain containing 1	-0.452788	0.0139041
SAT2	112483	spermidine/spermine N1-acetyltransferase family member 2	0.361752	0.035907
SBF1	6305	SET binding factor 1	0.316613	0.0337783
SCAND1	51282	SCAN domain containing 1	0.703017	0.00213899
SCAP	22937	SREBF chaperone	0.305793	0.0442587
SCARA3	51435	scavenger receptor class A member 3	-0.531163	0.00950759
SCLT1	132320	sodium channel and clathrin linker 1	-0.569404	0.0130113
SCRN3	79634	secernin 3	-0.568236	0.0417994
SDCCAG8	10806	serologically defined colon cancer antigen 8	0.476725	0.0427588
SDHA	6389	succinate dehydrogenase complex flavoprotein subunit A	0.466539	0.0199772
SDHAF1	644096	succinate dehydrogenase complex assembly factor 1	0.408146	0.0454748
SEC22A	26984	SEC22 homolog A, vesicle trafficking protein	-0.573669	0.0265592
SEC23IP	11196	SEC23 interacting protein	-0.452605	0.0171291
SEC62	7095	SEC62 homolog, preprotein translocation factor	0.566182	0.00175052
SELENOM	140606	selenoprotein M	0.528494	0.0137732
SEMA3C	10512	semaphorin 3C	-0.67767	0.0180208
SEMA4F	10505	ssemaphorin 4F	-0.664388	0.00190056
SEPTIN1	1731	septin 1	0.717473	0.0399895
SEPTIN11	55752	septin 11	-0.344569	0.0372483
SF1	7536	splicing factor 1	-0.411985	0.00826452
SGF29	112869	SAGA complex associated factor 29	0.662718	0.00435425
SGMS2	166929	sphingomyelin synthase 2	-0.66496	0.0124613
SGSH	6448	N-sulfoglucosamine sulfohydrolase	0.467859	0.00709203
SH3D19	152503	SH3 domain containing 19	-0.700849	0.00275728
SH3PXD2A	9644	SH3 and PX domains 2A	-0.417964	0.0482523
SH3PXD2B	285590	SH3 and PX domains 2B	0.402737	0.0268572
SHANK1	50944	SH3 and multiple ankyrin repeat domains 1	-1.29341	0.0138852
SHCBP1	79801	SHC binding and spindle associated 1	-1.02038	0.013687
SHISA5	51246	shisa family member 5	0.293239	0.0114524
SHISA9	729993	shisa family member 9	0.736863	0.044439
SHOX2	6474	short stature homeobox 2	0.917345	0.0151968
SHQ1	55164	SHQ1, H/ACA ribonucleoprotein assembly factor	-0.563188	0.0064326
SHTN1	57698	shootin 1	-0.665507	0.0121584
SIGIRR	59307	single Ig and TIR domain containing	0.427521	0.0477434
SIN3A	25942	SIN3 transcription regulator family member A	-0.421669	0.0464591
SIX4	51804	SIX homeobox 4	-0.523765	0.0122155
SLC23A2	9962	solute carrier family 23 member 2	-0.430286	0.0322669
SLC25A26	115286	solute carrier family 25 member 26	0.319165	0.0462306
SLC25A30	253512	solute carrier family 25 member 30	-0.419498	0.0461103
SLC27A4	10999	solute carrier family 27 member 4	0.527797	0.0281893
SLC35A4	113829	solute carrier family 35 member A4	-0.493069	0.0129277
SLC35E1	79939	solute carrier family 35 member E1	0.382898	0.0160311
SLC39A10	57181	solute carrier family 39 member 10	-0.852352	0.0090848
SLC4A2	6522	solute carrier family 4 member 2	0.855369	0.00738308
SLC4A7	9497	solute carrier family 4 member 7	0.650686	0.0143457
SLF2	55719	SMC5-SMC6 complex localization factor 2	-0.532294	0.0188039
SLIT2	9353	slit guidance ligand 2	-0.522453	0.0394156
SMAD4	4089	SMAD family member 4	-0.662143	0.0297731
SMAGP	57228	small cell adhesion glycoprotein	0.404215	0.0374586
SMARCA4	6597	SWI/SNF related, matrix associated, actin dependent regulator of chromatin, subfamily a, member 4	0.643084	0.0338995
SMC5	23137	structural maintenance of chromosomes 5	-0.477905	0.0300653
SMIM26	388789	small integral membrane protein 26	0.368643	0.0235867
SNED1	25992	sushi, nidogen and EGF like domains 1	-0.659727	0.0138012
SNHG10	283596	small nucleolar RNA host gene 10	1.00493	0.023051
SNHG19	100507303	small nucleolar RNA host gene 19	0.444134	0.0181195
SNHG8	100093630	small nucleolar RNA host gene 8	0.440832	0.00718921
SNIP1	79753	Smad nuclear interacting protein 1	-0.520008	0.0196224
SNX2	6643	sorting nexin 2	-0.360178	0.0419652
SOGA1	140710	suppressor of glucose, autophagy associated 1	-0.516802	0.0452939
SON	6651	SON DNA binding protein	0.549464	0.00914947
SOX4	6659	SRY-box transcription factor 4	0.935461	0.00774098
SPATA2	9825	spermatogenesis associated 2	-0.569544	0.00645709
SPATA2L	124044	spermatogenesis associated 2 like	0.577807	0.0204171
SPATS2	65244	spermatogenesis associated serine rich 2	-0.432796	0.00750739
SPCS3	60559	signal peptidase complex subunit 3	-0.337082	0.0257261
SPICE1	152185	spindle and centriole associated protein 1	-0.698624	0.00875931
SPIN1	10927	spindlin 1	-0.472569	0.00791791
SPIN4	139886	spindlin family member 4	-1.00693	0.0173592
SPRED3	399473	sprouty related EVH1 domain containing 3	-0.517641	0.0214327
SPSB3	90864	splA/ryanodine receptor domain and SOCS box containing 3	0.393735	0.0335543
SQOR	58472	sulfide quinone oxidoreductase	0.435163	0.037351
SRD5A3	79644	steroid 5 alpha-reductase 3	0.45655	0.047444
SREK1IP1	285672	SREK1 interacting protein 1	0.467248	0.0410133
SRF	6722	serum response factor	-0.310537	0.0313377
SRGAP1	57522	SLIT-ROBO Rho GTPase activating protein 1	0.850726	0.0159273
SRRM1	10250	serine and arginine repetitive matrix 1	0.682697	0.021871
SRSF1	6426	serine and arginine rich splicing factor 1	-0.318867	0.040561
SSR3	6747	signal sequence receptor subunit 3	-0.271832	0.0481628
SSU72	29101	SSU72 homolog, RNA polymerase II CTD phosphatase	0.274608	0.0446441
SSX2IP	117178	SSX family member 2 interacting protein	-0.507365	0.0414079
ST6GALNAC4	27090	ST6 N-acetylgalactosaminide alpha-2,6-sialyltransferase 4	0.416588	0.0176332
STC2	8614	stanniocalcin 2	-0.429771	0.0252079
STIL	6491	STIL centriolar assembly protein	-0.78517	0.00856553
STK11	6794	serine/threonine kinase 11	0.407574	0.0282777
STN1	79991	STN1 subunit of CST complex	0.335104	0.0292374
STUB1	10273	STIP1 homology and U-box containing protein 1	0.50879	0.0164584
STX17	55014	syntaxin 17	-0.83557	0.00458907
STX2	2054	syntaxin 2	-0.327229	0.0286638
STX7	8417	syntaxin 7	-0.460948	0.0186957
STXBP2	6813	syntaxin binding protein 2	0.385267	0.0208042
SUZ12P1	440423	SUZ12 pseudogene 1	-0.546627	0.0420479
SYMPK	8189	symplekin	0.447008	0.0490236
SYNJ2BP	55333	synaptojanin 2 binding protein	-0.761389	0.00965134
SZT2	23334	SZT2 subunit of KICSTOR complex	-0.434253	0.0330653
TACC3	10460	transforming acidic coiled-coil containing protein 3	-0.852642	0.0320361
TAF1A	9015	TATA-box binding protein associated factor, RNA polymerase I subunit A	-0.686744	0.0218101
TAF1D	79101	TATA-box binding protein associated factor, RNA polymerase I subunit D	0.271693	0.0481682
TAF6	6878	TATA-box binding protein associated factor 6	-0.396948	0.0108274
TAOK1	57551	TAO kinase 1	-0.489226	0.0295348
TBC1D2	55357	TBC1 domain family member 2	-0.49525	0.0207721
TBXA2R	6915	thromboxane A2 receptor	0.800599	0.00649201
TCAF1P1	653199	TRPM8 channel associated factor 1 pseudogene 1	-1.26761	0.00688641
TCERG1	10915	transcription elongation regulator 1	-0.484443	0.0318002
TCF12	6938	transcription factor 12	-0.348424	0.0289343
TCF25	22980	transcription factor 25	0.650607	0.00643318
TCIRG1	10312	T cell immune regulator 1, ATPase H+ transporting V0 subunit a3	0.439118	0.0107334
TES	26136	testin LIM domain protein	-0.392491	0.0102891
TEX9	374618	testis expressed 9	-1.32378	0.00505034
TFAM	7019	transcription factor A, mitochondrial	-0.574221	0.0371246
TGFBR2	7048	transforming growth factor beta receptor 2	-0.446832	0.0335472
TGIF2	60436	TGFB induced factor homeobox 2	-0.605743	0.0262246
TGS1	96764	trimethylguanosine synthase 1	-0.619918	0.0116869
THOC2	57187	THO complex 2	0.739987	0.00219259
THOC5	8563	THO complex 5	0.506229	0.00524825
THSD4	79875	thrombospondin type 1 domain containing 4	-0.525573	0.0460088
TIGAR	57103	TP53 induced glycolysis regulatory phosphatase	-0.784454	0.0349121
TLN2	83660	talin 2	-0.615895	0.0406232
TMEM106B	54664	transmembrane protein 106B	-0.396472	0.0308307
TMEM109	79073	transmembrane protein 109	0.336573	0.0376454
TMEM14A	28978	transmembrane protein 14A	-0.717031	0.0177136
TMEM158	25907	transmembrane protein 158 (gene/pseudogene)	0.637651	0.00525126
TMEM160	54958	transmembrane protein 160	0.800431	0.00859209
TMEM198	130612	transmembrane protein 198	0.768464	0.0207669
TMEM216	51259	transmembrane protein 216	-0.667219	0.0122532
TMEM233	387890	transmembrane protein 233	0.894008	0.0178218
TMEM237	65062	transmembrane protein 237	-0.549288	0.0260796
TMEM240	339453	transmembrane protein 240	1.15899	0.0125748
TMEM241	85019	transmembrane protein 241	-0.507691	0.0488003
TMEM39B	55116	transmembrane protein 39B	0.425003	0.0208129
TMEM94	9772	transmembrane protein 94	-0.351714	0.0480428
TMOD2	29767	tropomodulin 2	-0.47795	0.0367672
TMTC2	160335	transmembrane O-mannosyltransferase targeting cadherins 2	-0.84388	0.0199753
TNFSF13B	10673	TNF superfamily member 13b	1.15213	0.00473466
TNK2	10188	tyrosine kinase non receptor 2	0.483597	0.0146279
TOM1L2	146691	target of myb1 like 2 membrane trafficking protein	-0.622759	0.00485957
TP53I13	90313	tumor protein p53 inducible protein 13	0.601059	0.00452647
TPGS1	91978	tubulin polyglutamylase complex subunit 1	0.563921	0.0048344
TPM3	7170	tropomyosin 3	-0.352024	0.0302083
TPX2	22974	TPX2 microtubule nucleation factor	-0.76178	0.0191312
TRA2B	6434	transformer 2 beta homolog	-0.457673	0.00942485
TRADD	8717	TNFRSF1A associated via death domain	0.372166	0.0187723
TRAF3	7187	TNF receptor associated factor 3	-0.437835	0.0268691
TRAF3IP2	10758	TRAF3 interacting protein 2	0.498599	0.0244345
TRAFD1	10906	TRAF-type zinc finger domain containing 1	-0.382321	0.0167335
TRAPPC5	126003	trafficking protein particle complex 5	0.391679	0.0401172
TRDMT1	1787	tRNA aspartic acid methyltransferase 1	-0.92206	0.0123653
TREX1	11277	three prime repair exonuclease 1	0.645982	0.0110067
TRIM33	51592	tripartite motif containing 33	0.432062	0.0104505
TRIM44	54765	tripartite motif containing 44	-0.601989	0.00788317
TRIP13	9319	thyroid hormone receptor interactor 13	-0.929102	0.0138143
TRPM7	54822	transient receptor potential cation channel subfamily M member 7	-0.398466	0.0114854
TRPT1	83707	tRNA phosphotransferase 1	0.433452	0.0302723
TRUB1	142940	TruB pseudouridine synthase family member 1	-0.536276	0.0110949
TSEN15	116461	tRNA splicing endonuclease subunit 15	-0.347705	0.0406711
TSPAN12	23554	tetraspanin 12	-0.778552	0.0190173
TSSC4	10078	tumor suppressing subtransferable candidate 4	0.557741	0.0100042
TST	7263	thiosulfate sulfurtransferase	0.463465	0.0254942
TSTD2	158427	thiosulfate sulfurtransferase like domain containing 2	-0.466381	0.0245279
TSTD3	100130890	thiosulfate sulfurtransferase like domain containing 3	0.543143	0.0166777
TTC37	9652	tetratricopeptide repeat domain 37	-0.432549	0.00893607
TTK	7272	TTK protein kinase	-0.946161	0.0247399
TTLL7	79739	tubulin tyrosine ligase like 7	-0.620072	0.0438572
TTTY14	83869	testis-specific transcript, Y-linked 14	1.04318	0.0296151
TUBGCP2	10844	tubulin gamma complex associated protein 2	0.722749	0.00194071
TUSC1	286319	tumor suppressor candidate 1	0.3948	0.0184953
TWF2	11344	twinfilin actin binding protein 2	0.316351	0.0319069
TXNIP	10628	thioredoxin interacting protein	1.53982	0.000474213
TYMP	1890	thymidine phosphorylase	0.820526	0.00011034
UBE2N	7334	ubiquitin conjugating enzyme E2 N	-0.535983	0.00940589
UBE3A	7337	ubiquitin protein ligase E3A	0.595994	0.00163707
UBR4	23352	ubiquitin protein ligase E3 component n-recognin 4	0.45625	0.0333726
UBXN1	51035	UBX domain protein 1	0.280008	0.0409096
UCP2	7351	uncoupling protein 2	-0.703907	0.0436745
ULK4	54986	unc-51 like kinase 4	0.464721	0.0225635
UNC13B	10497	unc-13 homolog B	-0.465712	0.0187068
UNG	7374	uracil DNA glycosylase	-0.516018	0.0429779
UPF3A	65110	UPF3A regulator of nonsense mediated mRNA decay	0.468971	0.0129249
UQCC3	790955	ubiquinol-cytochrome c reductase complex assembly factor 3	0.606921	0.040171
USB1	79650	U6 snRNA biogenesis phosphodiesterase 1	-0.360007	0.0496919
UTRN	7402	utrophin	-0.999331	0.00247488
VANGL1	81839	VANGL planar cell polarity protein 1	-0.687458	0.0292152
VEGFB	7423	vascular endothelial growth factor B	0.39505	0.022576
VEPH1	79674	ventricular zone expressed PH domain containing 1	-0.638068	0.0025879
VGF	7425	VGF nerve growth factor inducible	0.490109	0.0347815
VIM-AS1	100507347	VIM antisense RNA 1	-1.28082	0.00243601
VIRMA	25962	vir like m6A methyltransferase associated	0.465563	0.0185703
VKORC1L1	154807	vitamin K epoxide reductase complex subunit 1 like 1	-0.439215	0.00513687
VPS26A	9559	VPS26, retromer complex component A	-0.594029	0.0250782
WAC-AS1	220906	WAC antisense RNA 1 (head to head)	0.411463	0.0278684
WBP11	51729	WW domain binding protein 11	-0.460784	0.00407693
WBP4	11193	WW domain binding protein 4	0.251343	0.0440842
WDHD1	11169	WD repeat and HMG-box DNA binding protein 1	-0.426528	0.0320327
WDR13	64743	WD repeat domain 13	0.483451	0.0394055
WDR3	10885	WD repeat domain 3	-0.885155	0.00668221
WDR33	55339	WD repeat domain 33	-0.417431	0.0193685
WDR60	55112	WD repeat domain 60	0.590906	0.02116
WDR83	84292	WD repeat domain 83	0.461798	0.0383785
WIPF1	7456	WAS/WASL interacting protein family member 1	-0.425625	0.010076
WNK1	65125	WNK lysine deficient protein kinase 1	-0.681749	0.00039321
WNT7B	7477	Wnt family member 7B	0.582998	0.0281713
WRAP73	49856	WD repeat containing, antisense to TP73	-0.612943	0.00213468
XACT	105463123	X active specific transcript	1.38672	0.00040975
YPEL3	83719	yippee like 3	0.637972	0.00772296
ZBED3-AS1	728723	ZBED3 antisense RNA 1	0.659158	0.0423235
ZBED6	100381270	zinc finger BED-type containing 6	-0.965365	0.00636535
ZBED8	63920	zinc finger BED-type containing 8	0.566403	0.0375414
ZBED9	114821	zinc finger BED-type containing 9	-1.09272	0.0190233
ZBTB18	10472	zinc finger and BTB domain containing 18	-0.799344	0.0315448
ZBTB38	253461	zinc finger and BTB domain containing 38	-0.456035	0.0465801
ZBTB48	3104	zinc finger and BTB domain containing 48	0.696594	0.0363295
ZC3H15	55854	zinc finger CCCH-type containing 15	0.318165	0.0178092
ZCRB1	85437	zinc finger CCHC-type and RNA binding motif containing 1	0.446778	0.00492267
ZDHHC1	29800	zinc finger DHHC-type containing 1	0.448147	0.0318407
ZDHHC24	254359	zinc finger DHHC-type containing 24	0.317934	0.0315385
ZFYVE26	23503	zinc finger FYVE-type containing 26	-0.416337	0.00922788
ZKSCAN7	55888	zinc finger with KRAB and SCAN domains 7	-0.8643	0.0499459
ZMYM4	9202	zinc finger MYM-type containing 4	-0.349361	0.0491672
ZMYND19	116225	zinc finger MYND-type containing 19	0.281444	0.0451472
ZNF333	84449	zinc finger protein 333	-0.562983	0.0335346
ZNF350	59348	zinc finger protein 350	-0.641243	0.0105268
ZNF358	140467	zinc finger protein 358	0.457711	0.0143464
ZNF407	55628	zinc finger protein 407	-0.534455	0.0496718
ZNF41	7592	zinc finger protein 41	-0.587931	0.0258293
ZNF415	55786	zinc finger protein 415	-0.686732	0.0215403
ZNF439	90594	zinc finger protein 439	-0.966983	0.00989202
ZNF468	90333	zinc finger protein 468	-0.69617	0.0432614
ZNF469	84627	zinc finger protein 469	-0.544619	0.040478
ZNF507	22847	zinc finger protein 507	-0.562453	0.0118983
ZNF510	22869	zinc finger protein 510	-0.688861	0.0208676
ZNF524	147807	zinc finger protein 524	0.45006	0.0200238
ZNF528-AS1	102724105	ZNF528 antisense RNA 1	0.798522	0.0463898
ZNF546	339327	zinc finger protein 546	-1.33036	0.0137905
ZNF580	51157	zinc finger protein 580	0.54545	0.00576697
ZNF581	51545	zinc finger protein 581	0.452789	0.0103389
ZNF582	147948	zinc finger protein 582	1.07572	0.0248539
ZNF587B	100293516	zinc finger protein 587B	0.541893	0.0499989
ZNF593	51042	zinc finger protein 593	0.568287	0.00361748
ZNF595	152687	zinc finger protein 595	0.636454	0.0144918
ZNF607	84775	zinc finger protein 607	0.61622	0.0344537
ZNF616	90317	zinc finger protein 616	-0.526266	0.00499523
ZNF644	84146	zinc finger protein 644	-0.416163	0.0114243
ZNF652	22834	zinc finger protein 652	0.643912	0.0463305
ZNF678	339500	zinc finger protein 678	-1.17016	0.0304115
ZNF710	374655	zinc finger protein 710	0.699548	0.0171376
ZNF766	90321	zinc finger protein 766	-0.451644	0.0452288
ZNF771	51333	zinc finger protein 771	0.570816	0.00313334
ZNF774	342132	zinc finger protein 774	-1.61378	0.00542935
ZNF775	285971	zinc finger protein 775	0.64184	0.0131731
ZNF776	284309	zinc finger protein 776	0.622086	0.0265627
ZNF778	197320	zinc finger protein 778	-1.02996	0.0417468
ZNF783	100289678	zinc finger family member 783	-0.769946	0.0288621
ZNF79	7633	zinc finger protein 79	-0.6356	0.034297
ZNF790-AS1	284408	ZNF790 antisense RNA 1	0.812367	0.0436432
ZNF821	55565	zinc finger protein 821	0.610457	0.0195747
ZNF91	7644	zinc finger protein 91	0.745457	0.0226061
ZRANB3	84083	zinc finger RANBP2-type containing 3	-0.674518	0.0362714
ZRSR2	8233	zinc finger CCCH-type, RNA binding motif and serine/arginine rich 2	0.480301	0.0284946
ZSCAN12	9753	zinc finger and SCAN domain containing 12	-0.589927	0.0228612
ZSCAN16-AS1	100129195	ZSCAN16 antisense RNA 1	0.543728	0.039499
ZSCAN20	7579	zinc finger and SCAN domain containing 20	-0.848625	0.0266264
ZWILCH	55055	zwilch kinetochore protein	-0.504297	0.0387362
ZWINT	11130	ZW10 interacting kinetochore protein	-1.01051	0.0373184

## Sheet: ECFCs - Hypoxia vs Normoxia
SYMBOL	ENTREZID	GENENAME	logFC	PValue
AAK1	22848	AP2 associated kinase 1	1.03761	0.000446055
AAMDC	28971	adipogenesis associated Mth938 domain containing	-0.295189	0.0370454
AARS1	16	alanyl-tRNA synthetase 1	0.439106	0.000684381
ABCB6	10058	ATP binding cassette subfamily B member 6 (Langereis blood group)	0.696875	0.014987
ABCC9	10060	ATP binding cassette subfamily C member 9	-1.48317	0.0449258
ABL2	27	ABL proto-oncogene 2, non-receptor tyrosine kinase	0.546361	0.0180744
ACAD8	27034	acyl-CoA dehydrogenase family member 8	-0.457511	0.0212524
ACBD3	64746	acyl-CoA binding domain containing 3	0.288778	0.0308828
ACOT2	10965	acyl-CoA thioesterase 2	-0.52167	0.0333345
ACOX1	51	acyl-CoA oxidase 1	0.343499	0.00402043
ACSM3	6296	acyl-CoA synthetase medium chain family member 3	-1.8287	0.049192
ACY1	95	aminoacylase 1	0.46792	0.0429008
ADAMTS7	11173	ADAM metallopeptidase with thrombospondin type 1 motif 7	-0.397021	0.0317461
ADD1	118	adducin 1	0.326948	0.0366919
ADGRG6	57211	adhesion G protein-coupled receptor G6	0.746132	0.0432223
ADM	133	adrenomedullin	1.28331	0.0144556
AEBP2	121536	AE binding protein 2	0.398845	0.00264689
AFAP1	60312	actin filament associated protein 1	0.251272	0.0371069
AFTPH	54812	aftiphilin	0.35	0.0399192
AGPAT1	10554	1-acylglycerol-3-phosphate O-acyltransferase 1	0.369057	0.0011399
AGPAT5	55326	1-acylglycerol-3-phosphate O-acyltransferase 5	0.548559	0.00237401
AHCY	191	adenosylhomocysteinase	0.264721	0.0406402
AHI1	54806	Abelson helper integration site 1	1.04769	0.0259402
AHNAK	79026	AHNAK nucleoprotein	0.36197	0.0439904
AHSA1	10598	activator of HSP90 ATPase activity 1	0.328323	0.0492339
AK4	205	adenylate kinase 4	1.0748	0.0003929
AKAP1	8165	A-kinase anchoring protein 1	-0.498155	0.0209198
AKAP13	11214	A-kinase anchoring protein 13	0.403252	0.0134475
AKAP8	10270	A-kinase anchoring protein 8	-0.434828	0.00894549
ALDH3A1	218	aldehyde dehydrogenase 3 family member A1	-1.05221	0.0323903
ALDH6A1	4329	aldehyde dehydrogenase 6 family member A1	0.809317	0.00426837
ALDOA	226	aldolase, fructose-bisphosphate A	0.582294	0.00258959
ALDOC	230	aldolase, fructose-bisphosphate C	1.05465	0.00326767
ALG10B	144245	ALG10 alpha-1,2-glucosyltransferase B	-0.559543	0.0422153
AMBRA1	55626	autophagy and beclin 1 regulator 1	0.507949	0.00384116
AMFR	267	autocrine motility factor receptor	0.30141	0.0167795
AMOTL2	51421	angiomotin like 2	-0.372083	0.0282417
AMPD2	271	adenosine monophosphate deaminase 2	0.523949	0.0316739
ANAPC2	29882	anaphase promoting complex subunit 2	-0.338955	0.0331865
ANAPC4	29945	anaphase promoting complex subunit 4	-0.390058	0.0438186
ANGPTL4	51129	angiopoietin like 4	1.56138	0.000255077
ANKMY1	51281	ankyrin repeat and MYND domain containing 1	-0.613562	0.0445338
ANKRD12	23253	ankyrin repeat domain 12	1.47341	0.000110007
ANKRD17	26057	ankyrin repeat domain 17	0.513414	0.00191035
ANKRD26	22852	ankyrin repeat domain 26	0.6605	0.00477575
ANKRD36C	400986	ankyrin repeat domain 36C	1.69819	0.000179292
ANKRD37	353322	ankyrin repeat domain 37	2.46114	0.000144254
ANKRD46	157567	ankyrin repeat domain 46	0.369668	0.0341611
ANP32B	10541	acidic nuclear phosphoprotein 32 family member B	0.340844	0.022104
ANXA11	311	annexin A11	0.355127	0.0445117
ANXA6	309	annexin A6	0.363774	0.0027032
ANXA7	310	annexin A7	-0.26328	0.0150241
AP3D1	8943	adaptor related protein complex 3 subunit delta 1	0.498697	0.000898949
AP5Z1	9907	adaptor related protein complex 5 subunit zeta 1	-0.470334	0.0112728
APEX2	27301	apurinic/apyrimidinic endodeoxyribonuclease 2	-0.385753	0.0413357
APOBEC3C	27350	apolipoprotein B mRNA editing enzyme catalytic subunit 3C	0.638094	0.0364664
AQP3	360	aquaporin 3 (Gill blood group)	1.25793	0.0259541
ARC	23237	activity regulated cytoskeleton associated protein	4.19418	0.00160376
ARF6	382	ADP ribosylation factor 6	0.368438	0.00286049
ARFIP2	23647	ADP ribosylation factor interacting protein 2	-0.455388	0.00311851
ARGLU1	55082	arginine and glutamate rich 1	-0.541205	0.0209718
ARHGAP1	392	Rho GTPase activating protein 1	-0.518573	0.00169487
ARHGAP27	201176	Rho GTPase activating protein 27	-0.5772	0.0473021
ARHGAP33	115703	Rho GTPase activating protein 33	-1.15827	0.0490851
ARHGAP45	23526	Rho GTPase activating protein 45	1.20115	0.0116295
ARHGDIB	397	Rho GDP dissociation inhibitor beta	-0.365941	0.031159
ARHGEF11	9826	Rho guanine nucleotide exchange factor 11	-0.534431	0.023994
ARHGEF18	23370	Rho/Rac guanine nucleotide exchange factor 18	0.630201	0.000358647
ARHGEF37	389337	Rho guanine nucleotide exchange factor 37	-0.634296	0.0163933
ARID2	196528	AT-rich interaction domain 2	0.500995	0.00222145
ARID4A	5926	AT-rich interaction domain 4A	1.09516	0.000385977
ARID4B	51742	AT-rich interaction domain 4B	0.691401	0.00328033
ARID5B	84159	AT-rich interaction domain 5B	0.76575	0.0126429
ARL13B	200894	ADP ribosylation factor like GTPase 13B	0.540518	0.0160162
ARL16	339231	ADP ribosylation factor like GTPase 16	-0.444573	0.0316413
ARMC10	83787	armadillo repeat containing 10	0.468513	0.00568395
ARPP19	10776	cAMP regulated phosphoprotein 19	-0.259705	0.0385026
ARRDC3	57561	arrestin domain containing 3	0.820655	0.0156048
ASCC3	10973	activating signal cointegrator 1 complex subunit 3	0.389847	0.0488377
ASF1A	25842	anti-silencing function 1A histone chaperone	-0.418958	0.00728128
ASPM	259266	abnormal spindle microtubule assembly	1.10456	0.035646
ATG14	22863	autophagy related 14	0.380241	0.0289581
ATG16L2	89849	autophagy related 16 like 2	-0.630874	0.0431425
ATOH8	84913	atonal bHLH transcription factor 8	0.349378	0.0148839
ATP11B	23200	ATPase phospholipid transporting 11B (putative)	0.341855	0.0331149
ATP5PF	522	ATP synthase peripheral stalk subunit F6	-0.325988	0.0177176
ATP6V1C1	528	ATPase H+ transporting V1 subunit C1	0.304032	0.0479271
ATP6V1G1	9550	ATPase H+ transporting V1 subunit G1	-0.325439	0.00295434
ATP8A2	51761	ATPase phospholipid transporting 8A2	0.81701	0.0396821
ATR	545	ATR serine/threonine kinase	0.660235	0.0151307
ATRX	546	ATRX chromatin remodeler	0.681136	0.00465396
ATXN2	6311	ataxin 2	0.4663	0.0294065
ATXN7	6314	ataxin 7	0.526014	0.0164223
AURKB	9212	aurora kinase B	0.998719	0.0271412
AVPI1	60370	arginine vasopressin induced 1	-0.928417	0.00347765
AXL	558	AXL receptor tyrosine kinase	1.08827	1.90198e-05
B3GNT7	93010	UDP-GlcNAc:betaGal beta-1,3-N-acetylglucosaminyltransferase 7	1.20621	0.00995531
BACH2	60468	BTB domain and CNC homolog 2	-1.40228	0.0204508
BAG3	9531	BCL2 associated athanogene 3	0.401273	0.0245645
BAG4	9530	BCL2 associated athanogene 4	0.607055	0.011118
BAHCC1	57597	BAH domain and coiled-coil containing 1	-1.557	0.00518548
BAIAP2	10458	BAR/IMD domain containing adaptor protein 2	0.361649	0.0431599
BAMBI	25805	BMP and activin membrane bound inhibitor	1.14765	0.0138716
BARD1	580	BRCA1 associated RING domain 1	1.10575	0.00443011
BAZ1B	9031	bromodomain adjacent to zinc finger domain 1B	0.474904	0.00027422
BAZ2A	11176	bromodomain adjacent to zinc finger domain 2A	0.399277	0.00539005
BBS4	585	Bardet-Biedl syndrome 4	-0.725173	0.00216862
BBX	56987	BBX high mobility group box domain containing	0.95119	0.000264899
BCKDHB	594	branched chain keto acid dehydrogenase E1 subunit beta	-0.484922	0.0274837
BCL10	8915	BCL10 immune signaling adaptor	0.331955	0.0459411
BCL2L2	599	BCL2 like 2	-0.538217	0.0034809
BCL6	604	BCL6 transcription repressor	0.488054	0.0228787
BCL9	607	BCL9 transcription coactivator	0.877253	0.000960551
BCYRN1	618	brain cytoplasmic RNA 1	1.20442	0.00117106
BDH2	56898	3-hydroxybutyrate dehydrogenase 2	-0.595739	0.0186121
BEX4	56271	brain expressed X-linked 4	-0.584446	0.00699521
BHLHE40	8553	basic helix-loop-helix family member e40	1.20509	0.000719126
BID	637	BH3 interacting domain death agonist	-0.342923	0.0287761
BIN1	274	bridging integrator 1	0.489425	0.0309986
BLOC1S6	26258	biogenesis of lysosomal organelles complex 1 subunit 6	-0.618686	0.0430318
BMERB1	89927	bMERB domain containing 1	-0.497688	0.0212796
BNIP2	663	BCL2 interacting protein 2	-0.467517	0.00285714
BOP1	23246	BOP1 ribosomal biogenesis factor	0.375984	0.0106264
BORCS6	54785	BLOC-1 related complex subunit 6	0.351359	0.0138595
BORCS8	729991	BLOC-1 related complex subunit 8	-0.41129	0.0113552
BRCA1	672	BRCA1 DNA repair associated	0.649246	0.0471218
BRD4	23476	bromodomain containing 4	0.421291	0.00840494
BRK1	55845	BRICK1 subunit of SCAR/WAVE actin nucleating complex	-0.30199	0.0176972
BRMS1L	84312	BRMS1 like transcriptional repressor	-0.317134	0.0461769
BROX	148362	BRO1 domain and CAAX motif containing	0.34977	0.0351863
BRWD3	254065	bromodomain and WD repeat domain containing 3	0.454971	0.00501714
BSCL2	26580	BSCL2 lipid droplet biogenesis associated, seipin	0.575844	0.0237357
BTBD19	149478	BTB domain containing 19	-0.736179	0.00512612
BTBD8	284697	BTB domain containing 8	0.938334	0.0207
BTF3L4	91408	basic transcription factor 3 like 4	-0.332815	0.0459973
BTN2A3P	54718	butyrophilin subfamily 2 member A3, pseudogene	-0.906196	0.0459678
C11orf49	79096	chromosome 11 open reading frame 49	-0.414351	0.0181296
C11orf71	54494	chromosome 11 open reading frame 71	-0.903068	0.00510448
C11orf96	387763	chromosome 11 open reading frame 96	1.49801	0.00930561
C12orf50	160419	chromosome 12 open reading frame 50	-2.25826	0.0156893
C18orf54	162681	chromosome 18 open reading frame 54	0.827193	0.000140249
C1GALT1C1	29071	C1GALT1 specific chaperone 1	-0.30104	0.0114671
C1orf112	55732	chromosome 1 open reading frame 112	0.593245	0.0297788
C5orf15	56951	chromosome 5 open reading frame 15	-0.333495	0.0442114
C6orf141	135398	chromosome 6 open reading frame 141	-0.807594	0.0110627
C6orf226	441150	chromosome 6 open reading frame 226	-0.703955	0.02855
C7orf31	136895	chromosome 7 open reading frame 31	0.852994	0.0189506
C9orf116	138162	chromosome 9 open reading frame 116	-0.668703	0.0190298
C9orf72	203228	C9orf72-SMCR8 complex subunit	-0.449832	0.0293425
CA13	377677	carbonic anhydrase 13	-0.623519	0.0227965
CABIN1	23523	calcineurin binding protein 1	0.365099	0.0227403
CALR	811	calreticulin	0.435716	0.00275633
CAND1	55832	cullin associated and neddylation dissociated 1	0.298397	0.0116424
CANX	821	calnexin	0.271204	0.0464332
CAPN15	6650	calpain 15	-0.412177	0.00791909
CAPZA1	829	capping actin protein of muscle Z-line subunit alpha 1	0.341713	0.010714
CARD19	84270	caspase recruitment domain family member 19	-0.374375	0.0385262
CARS2	79587	cysteinyl-tRNA synthetase 2, mitochondrial	0.388744	0.00593742
CASP4	837	caspase 4	-0.312032	0.0266104
CASP6	839	caspase 6	-0.466803	0.0195934
CAVIN1	284119	caveolae associated protein 1	0.353247	0.00597215
CBWD1	55871	COBW domain containing 1	-0.434699	0.0203385
CBX3	11335	chromobox 3	-0.251508	0.0320334
CBX6	23466	chromobox 6	0.339486	0.0386475
CC2D1A	54862	coiled-coil and C2 domain containing 1A	0.303176	0.0455565
CCDC102A	92922	coiled-coil domain containing 102A	0.593308	0.0499347
CCDC112	153733	coiled-coil domain containing 112	0.399691	0.046776
CCDC12	151903	coiled-coil domain containing 12	-0.491786	0.0180188
CCDC14	64770	coiled-coil domain containing 14	-0.610752	0.0103122
CCDC174	51244	coiled-coil domain containing 174	0.584001	0.0114956
CCDC57	284001	coiled-coil domain containing 57	1.18302	0.0465995
CCDC6	8030	coiled-coil domain containing 6	0.479	0.000283965
CCDC88A	55704	coiled-coil domain containing 88A	0.815992	0.00386229
CCNI	10983	cyclin I	0.433921	0.00317787
CCRL2	9034	C-C motif chemokine receptor like 2	-0.401791	0.0155136
CCT4	10575	chaperonin containing TCP1 subunit 4	0.339682	0.0190016
CCT6B	10693	chaperonin containing TCP1 subunit 6B	-1.00873	0.0251498
CD58	965	CD58 molecule	-0.398109	0.0368851
CDC40	51362	cell division cycle 40	0.314948	0.0401814
CDC42EP4	23580	CDC42 effector protein 4	0.363915	0.0145306
CDCA5	113130	cell division cycle associated 5	0.843136	0.00939613
CDCA8	55143	cell division cycle associated 8	0.737548	0.0341766
CDCP1	64866	CUB domain containing protein 1	1.92404	0.0491751
CDK11B	984	cyclin dependent kinase 11B	0.279309	0.0455185
CDK2AP2	10263	cyclin dependent kinase 2 associated protein 2	0.524093	0.00709843
CDK4	1019	cyclin dependent kinase 4	-0.396439	0.0195599
CDR2L	30850	cerebellar degeneration related protein 2 like	0.38825	0.00335194
CEBPB	1051	CCAAT enhancer binding protein beta	0.695521	0.0438395
CEBPD	1052	CCAAT enhancer binding protein delta	1.7937	0.00331508
CELF1	10658	CUGBP Elav-like family member 1	0.357608	0.0158562
CELSR3	1951	cadherin EGF LAG seven-pass G-type receptor 3	-1.25496	0.0415891
CEMIP2	23670	cell migration inducing hyaluronidase 2	0.34946	0.0336246
CENPE	1062	centromere protein E	1.10799	0.00759171
CEP104	9731	centrosomal protein 104	0.665511	0.000643257
CEPT1	10390	choline/ethanolamine phosphotransferase 1	0.342556	0.0213982
CFAP54	144535	cilia and flagella associated protein 54	-0.82497	0.0333979
CHAF1B	8208	chromatin assembly factor 1 subunit B	-0.811489	0.014691
CHD2	1106	chromodomain helicase DNA binding protein 2	0.77247	0.0236368
CHD3	1107	chromodomain helicase DNA binding protein 3	0.490253	0.00388162
CHD4	1108	chromodomain helicase DNA binding protein 4	0.491705	0.00153258
CHFR	55743	checkpoint with forkhead and ring finger domains	-0.42148	0.0016488
CHORDC1	26973	cysteine and histidine rich domain containing 1	0.805445	0.000117884
CHP1	11261	calcineurin like EF-hand protein 1	0.959004	4.12592e-05
CHPF2	54480	chondroitin polymerizing factor 2	-0.396826	0.0334594
CHRNA7	1139	cholinergic receptor nicotinic alpha 7 subunit	-1.37858	0.00830451
CHST14	113189	carbohydrate sulfotransferase 14	-0.331845	0.00912996
CHTF8	54921	chromosome transmission fidelity factor 8	0.480818	0.000574482
CIAPIN1	57019	cytokine induced apoptosis inhibitor 1	-0.310497	0.0176083
CIRBP	1153	cold inducible RNA binding protein	-0.841577	4.13369e-05
CKAP5	9793	cytoskeleton associated protein 5	0.69753	0.00615356
CKS2	1164	CDC28 protein kinase regulatory subunit 2	0.649256	0.0033702
CLBA1	122616	clathrin binding box of aftiphilin containing 1	-0.906635	0.00325999
CLDN11	5010	claudin 11	0.577978	0.00777392
CLEC16A	23274	C-type lectin domain containing 16A	0.391739	0.00878828
CLHC1	130162	clathrin heavy chain linker domain containing 1	-1.53693	0.0302867
CLIP2	7461	CAP-Gly domain containing linker protein 2	0.498602	0.00468419
CLPTM1	1209	CLPTM1 regulator of GABA type A receptor forward trafficking	0.313911	0.0178437
CLPX	10845	caseinolytic mitochondrial matrix peptidase chaperone subunit	-0.644569	0.0191106
CLSPN	63967	claspin	0.852349	0.0291341
CLTC	1213	clathrin heavy chain	0.275086	0.0350719
CNP	1267	2',3'-cyclic nucleotide 3' phosphodiesterase	0.475534	0.00039325
CNPY3	10695	canopy FGF signaling regulator 3	0.368362	0.00894111
COASY	80347	Coenzyme A synthase	0.453554	0.00340957
COG1	9382	component of oligomeric golgi complex 1	0.36244	0.0410104
COG3	83548	component of oligomeric golgi complex 3	-0.400079	0.0103561
COMMD2	51122	COMM domain containing 2	-0.462603	0.0042346
COMMD4	54939	COMM domain containing 4	-0.437495	0.0139302
COMMD5	28991	COMM domain containing 5	-0.435871	0.012582
COPE	11316	coatomer protein complex subunit epsilon	-0.280372	0.0204291
COQ7	10229	coenzyme Q7, hydroxylase	-0.476643	0.010626
COX11	1353	cytochrome c oxidase copper chaperone COX11	-0.456712	0.0234889
CPLANE2	79363	ciliogenesis and planar polarity effector 2	1.28219	0.0138095
CRELD1	78987	cysteine rich with EGF like domains 1	0.711261	0.0385992
CRELD2	79174	cysteine rich with EGF like domains 2	0.51527	0.00352385
CRIPT	9419	CXXC repeat containing interactor of PDZ3 domain	0.433561	0.0374313
CRNKL1	51340	crooked neck pre-mRNA splicing factor 1	0.381119	0.0360688
CROT	54677	carnitine O-octanoyltransferase	-0.470838	0.0488985
CRTC1	23373	CREB regulated transcription coactivator 1	-0.502142	0.0295289
CRYBG3	131544	crystallin beta-gamma domain containing 3	0.356487	0.0278331
CSE1L	1434	chromosome segregation 1 like	0.464835	0.00287693
CSNK1A1	1452	casein kinase 1 alpha 1	0.320929	0.00907696
CSNK1G1	53944	casein kinase 1 gamma 1	0.615264	0.000169143
CSNK2A2	1459	casein kinase 2 alpha 2	0.252146	0.0243142
CSPP1	79848	centrosome and spindle pole associated protein 1	0.4252	0.0239286
CTCF	10664	CCCTC-binding factor	0.348891	0.00315402
CTNNAL1	8727	catenin alpha like 1	0.621266	0.00797792
CTNNB1	1499	catenin beta 1	0.304454	0.0403539
CTNNBL1	56259	catenin beta like 1	0.480143	0.016234
CTR9	9646	CTR9 homolog, Paf1/RNA polymerase II complex component	0.313411	0.0184642
CTSO	1519	cathepsin O	-0.669097	0.00747256
CUBN	8029	cubilin	-0.494037	0.0313535
CUL4B	8450	cullin 4B	0.294181	0.0125004
CUX1	1523	cut like homeobox 1	0.329323	0.0323991
CWC27	10283	CWC27 spliceosome associated cyclophilin	0.270001	0.0256495
CWF19L2	143884	CWF19 like cell cycle control factor 2	0.649452	0.000885506
CXCL3	2921	C-X-C motif chemokine ligand 3	2.03161	0.0352458
CXCL8	3576	C-X-C motif chemokine ligand 8	2.00383	0.00781056
CXorf38	159013	chromosome X open reading frame 38	-0.41023	0.0119637
CXXC5	51523	CXXC finger protein 5	0.72061	0.0350943
CYB561D1	284613	cytochrome b561 family member D1	-0.470866	0.0448347
CYP2S1	29785	cytochrome P450 family 2 subfamily S member 1	0.772567	0.0293683
CYP51A1	1595	cytochrome P450 family 51 subfamily A member 1	0.527826	0.000279867
CYTH1	9267	cytohesin 1	-0.336492	0.0188322
DAGLB	221955	diacylglycerol lipase beta	1.27982	0.00483157
DARS2	55157	aspartyl-tRNA synthetase 2, mitochondrial	0.263374	0.0434988
DAZAP2	9802	DAZ associated protein 2	-0.302658	0.0157529
DCAF10	79269	DDB1 and CUL4 associated factor 10	0.417534	0.00802037
DCAF15	90379	DDB1 and CUL4 associated factor 15	-0.380982	0.0296954
DCAF6	55827	DDB1 and CUL4 associated factor 6	0.301695	0.0352125
DCLRE1C	64421	DNA cross-link repair 1C	0.623644	0.011093
DCP1A	55802	decapping mRNA 1A	0.536264	0.0101587
DCTN6	10671	dynactin subunit 6	-0.352945	0.0035312
DCUN1D4	23142	defective in cullin neddylation 1 domain containing 4	0.681666	0.000286593
DDA1	79016	DET1 and DDB1 associated 1	-0.312995	0.016705
DDAH1	23576	dimethylarginine dimethylaminohydrolase 1	0.548122	0.0048999
DDIT3	1649	DNA damage inducible transcript 3	1.52125	0.00877953
DDIT4	54541	DNA damage inducible transcript 4	1.04049	0.00607502
DDX17	10521	DEAD-box helicase 17	0.493826	0.00351833
DDX18	8886	DEAD-box helicase 18	0.255336	0.0196565
DDX19B	11269	DEAD-box helicase 19B	-0.526192	0.0177507
DDX21	9188	DExD-box helicase 21	0.424284	0.0335145
DDX46	9879	DEAD-box helicase 46	0.306887	0.0234207
DDX5	1655	DEAD-box helicase 5	-0.44121	0.00597894
DDX50	79009	DExD-box helicase 50	0.304643	0.0172065
DDX54	79039	DEAD-box helicase 54	0.640681	0.012499
DDX59	83479	DEAD-box helicase 59	-0.420435	0.0200821
DECR2	26063	2,4-dienoyl-CoA reductase 2	-0.393615	0.0221554
DEF8	54849	differentially expressed in FDCP 8 homolog	-0.253334	0.0434604
DEGS1	8560	delta 4-desaturase, sphingolipid 1	-0.273677	0.0144445
DENND1A	57706	DENN domain containing 1A	0.884135	0.000649986
DENND4A	10260	DENN domain containing 4A	0.386926	0.0104059
DESI1	27351	desumoylating isopeptidase 1	0.51212	0.00977433
DGCR11	25786	DiGeorge syndrome critical region gene 11	-0.724997	0.0300503
DHCR24	1718	24-dehydrocholesterol reductase	0.798284	0.00633954
DHDDS	79947	dehydrodolichyl diphosphate synthase subunit	0.375958	0.0183219
DHFR2	200895	dihydrofolate reductase 2	0.517431	0.0397023
DHFRP1	573971	dihydrofolate reductase pseudogene 1	1.86983	0.0464413
DHRS11	79154	dehydrogenase/reductase 11	-0.736535	0.0146559
DHX35	60625	DEAH-box helicase 35	-0.856071	0.00945781
DIAPH1	1729	diaphanous related formin 1	0.275527	0.019876
DIAPH3	81624	diaphanous related formin 3	0.638436	0.0416932
DIMT1	27292	DIMT1 rRNA methyltransferase and ribosome maturation factor	-0.409144	0.0179526
DLGAP1-AS2	84777	DLGAP1 antisense RNA 2	-0.592418	0.0438848
DMAC2L	27109	distal membrane arm assembly complex 2 like	-1.12159	0.00016426
DMWD	1762	DM1 locus, WD repeat containing	-0.279896	0.0468558
DNAH1	25981	dynein axonemal heavy chain 1	-1.34421	0.00979733
DNAJA1	3301	DnaJ heat shock protein family (Hsp40) member A1	0.340778	0.00396534
DNAJA4	55466	DnaJ heat shock protein family (Hsp40) member A4	1.14783	0.00155737
DNAJB1	3337	DnaJ heat shock protein family (Hsp40) member B1	0.732545	0.00419567
DNAJB9	4189	DnaJ heat shock protein family (Hsp40) member B9	0.531375	0.0186776
DNAJC1	64215	DnaJ heat shock protein family (Hsp40) member C1	0.507733	0.0202114
DNAJC10	54431	DnaJ heat shock protein family (Hsp40) member C10	0.49714	0.00289573
DNAJC16	23341	DnaJ heat shock protein family (Hsp40) member C16	0.581612	0.0171986
DNAJC2	27000	DnaJ heat shock protein family (Hsp40) member C2	0.370024	0.0477527
DNAJC3	5611	DnaJ heat shock protein family (Hsp40) member C3	0.628758	0.00505956
DNAJC7	7266	DnaJ heat shock protein family (Hsp40) member C7	0.404635	0.0387001
DNMT1	1786	DNA methyltransferase 1	0.62001	0.0443946
DOP1A	23033	DOP1 leucine zipper like protein A	-0.700379	0.0243763
DPF3	8110	double PHD fingers 3	-2.28813	0.00136951
DPYSL2	1808	dihydropyrimidinase like 2	0.917373	0.000291789
DR1	1810	down-regulator of transcription 1	0.325494	0.0341244
DRG1	4733	developmentally regulated GTP binding protein 1	0.314984	0.0335272
DROSHA	29102	drosha ribonuclease III	0.98133	0.00183526
DTNBP1	84062	dystrobrevin binding protein 1	-0.468226	0.0371729
DTX3L	151636	deltex E3 ubiquitin ligase 3L	0.501654	0.0310622
DUSP1	1843	dual specificity phosphatase 1	0.366485	0.0364705
DUSP12	11266	dual specificity phosphatase 12	-0.562006	0.00457947
DUSP14	11072	dual specificity phosphatase 14	-0.354223	0.022772
DUSP7	1849	dual specificity phosphatase 7	0.684575	6.82141e-05
DYM	54808	dymeclin	0.492821	0.00204629
DYNC1H1	1778	dynein cytoplasmic 1 heavy chain 1	0.472775	0.000819246
E2F4	1874	E2F transcription factor 4	-0.327858	0.0139217
ECPAS	23392	Ecm29 proteasome adaptor and scaffold	0.382423	0.00303725
EEF1A1P13	133283	eukaryotic translation elongation factor 1 alpha 1 pseudogene 13	0.733016	0.0425401
EEF1AKMT2	399818	EEF1A lysine methyltransferase 2	-0.611642	0.00951543
EEF2	1938	eukaryotic translation elongation factor 2	0.620882	0.00100277
EGFL7	51162	EGF like domain multiple 7	-0.56119	0.00249769
EGLN3	112399	egl-9 family hypoxia inducible factor 3	2.98339	0.00902574
EGR1	1958	early growth response 1	1.07138	0.0461941
EHBP1L1	254102	EH domain binding protein 1 like 1	1.00124	0.000561607
EID1	23741	EP300 interacting inhibitor of differentiation 1	-0.268487	0.0226882
EID2B	126272	EP300 interacting inhibitor of differentiation 2B	-0.678529	0.0447517
EIF1B-AS1	440952	EIF1B antisense RNA 1	-1.5063	0.0422767
EIF2S2	8894	eukaryotic translation initiation factor 2 subunit beta	0.440369	0.0105517
EIF3C	8663	eukaryotic translation initiation factor 3 subunit C	0.540732	0.00771181
EIF3J	8669	eukaryotic translation initiation factor 3 subunit J	0.502298	0.000337075
EIF4A2	1974	eukaryotic translation initiation factor 4A2	0.464746	0.00183149
EIF5B	9669	eukaryotic translation initiation factor 5B	0.747712	9.71084e-05
ELAC1	55520	elaC ribonuclease Z 1	-0.575357	0.0207779
ELP1	8518	elongator complex protein 1	0.445856	0.00681655
EMC8	10328	ER membrane protein complex subunit 8	-0.375648	0.0110227
EME2	197342	essential meiotic structure-specific endonuclease subunit 2	-1.09311	0.00653326
ENO1	2023	enolase 1	0.288279	0.0444039
ENO2	2026	enolase 2	2.24438	0.000133278
EPB41L4A-DT	54508	EPB41L4A divergent transcript	-0.742686	0.0308061
EPM2A	7957	EPM2A glucan phosphatase, laforin	-0.542662	0.0450595
EPRS1	2058	glutamyl-prolyl-tRNA synthetase 1	0.519049	9.33344e-05
ERCC4	2072	ERCC excision repair 4, endonuclease catalytic subunit	0.510474	0.00738181
ERCC6	2074	ERCC excision repair 6, chromatin remodeling factor	0.393162	0.0454745
ERG	2078	ETS transcription factor ERG	-0.34905	0.0287216
ERGIC2	51290	ERGIC and golgi 2	0.291013	0.0226627
ERH	2079	ERH mRNA splicing and mitosis factor	-0.368979	0.0254874
ERRFI1	54206	ERBB receptor feedback inhibitor 1	0.646412	0.0104024
ESF1	51575	ESF1 nucleolar pre-rRNA processing protein homolog	0.717113	0.00237999
ETFRF1	144363	electron transfer flavoprotein regulatory factor 1	-0.480616	0.00841139
ETV6	2120	ETS variant transcription factor 6	0.426506	0.0028613
EWSR1	2130	EWS RNA binding protein 1	-0.307539	0.0268808
EXOC3	11336	exocyst complex component 3	0.313877	0.0173317
EXOC3-AS1	116349	EXOC3 antisense RNA 1	-0.836738	0.0365777
EXOC4	60412	exocyst complex component 4	0.450231	0.00748926
EYA3	2140	EYA transcriptional coactivator and phosphatase 3	0.646331	0.000304846
EZH2	2146	enhancer of zeste 2 polycomb repressive complex 2 subunit	-0.565159	0.0375811
EZR	7430	ezrin	0.341015	0.0307827
F2RL3	9002	F2R like thrombin or trypsin receptor 3	-0.541951	0.0318564
FADS2	9415	fatty acid desaturase 2	0.490386	0.0303123
FAF1	11124	Fas associated factor 1	0.310674	0.036435
FAM107B	83641	family with sequence similarity 107 member B	-0.347171	0.0168322
FAM110A	83541	family with sequence similarity 110 member A	0.605861	0.0290431
FAM114A1	92689	family with sequence similarity 114 member A1	0.525489	0.00605381
FAM114A2	10827	family with sequence similarity 114 member A2	0.295972	0.0181926
FAM120A	23196	family with sequence similarity 120A	0.328633	0.00714168
FAM131A	131408	family with sequence similarity 131 member A	0.442246	0.0257647
FAM131B	9715	family with sequence similarity 131 member B	0.955259	0.038197
FAM13B	51306	family with sequence similarity 13 member B	-0.48021	0.0393986
FAM149B1	317662	family with sequence similarity 149 member B1	0.444177	0.0182428
FAM160B2	64760	family with sequence similarity 160 member B2	-0.360058	0.0224406
FAM168B	130074	family with sequence similarity 168 member B	-0.372688	0.00892211
FAM171B	165215	family with sequence similarity 171 member B	0.440156	0.0196662
FAM185A	222234	family with sequence similarity 185 member A	0.664725	0.030492
FAM189B	10712	family with sequence similarity 189 member B	0.300706	0.0113814
FAM207A	85395	family with sequence similarity 207 member A	0.389511	0.00943858
FAM210A	125228	family with sequence similarity 210 member A	0.480149	0.00286546
FAM241A	132720	family with sequence similarity 241 member A	-0.908145	0.00604131
FAM47E	100129583	family with sequence similarity 47 member E	-1.15065	0.0231344
FAM76B	143684	family with sequence similarity 76 member B	-0.605854	0.0116824
FAM86C1	55199	family with sequence similarity 86 member C1	-0.777785	0.0196785
FANCG	2189	FA complementation group G	0.570449	0.025178
FASN	2194	fatty acid synthase	0.561962	0.00105949
FASTKD3	79072	FAST kinase domains 3	-0.532397	0.0461661
FBXL14	144699	F-box and leucine rich repeat protein 14	0.458112	0.0156479
FBXL19-AS1	283932	FBXL19 antisense RNA 1	-1.10374	0.0405376
FBXL20	84961	F-box and leucine rich repeat protein 20	0.496917	0.0087583
FBXO22	26263	F-box protein 22	0.398258	0.0233388
FBXO45	200933	F-box protein 45	0.324426	0.0167428
FCHSD1	89848	FCH and double SH3 domains 1	-0.593334	0.0325479
FEM1A	55527	fem-1 homolog A	0.358525	0.00610169
FGFRL1	53834	fibroblast growth factor receptor like 1	-0.287938	0.042876
FKBP4	2288	FKBP prolyl isomerase 4	0.790013	1.55178e-06
FLI1	2313	Fli-1 proto-oncogene, ETS transcription factor	0.304691	0.0345068
FLNA	2316	filamin A	0.401344	0.035071
FLNC	2318	filamin C	0.350383	0.0360134
FNTB	2342	farnesyltransferase, CAAX box, beta	0.392676	0.00363776
FOXJ3	22887	forkhead box J3	-0.303013	0.0492545
FOXK1	221937	forkhead box K1	0.648472	0.00310706
FOXP1	27086	forkhead box P1	0.664254	0.00258679
FOXRED1	55572	FAD dependent oxidoreductase domain containing 1	-0.486476	0.0225651
FPGS	2356	folylpolyglutamate synthase	-0.274489	0.0460879
FRMD8	83786	FERM domain containing 8	-0.376575	0.0169322
FSD1L	83856	fibronectin type III and SPRY domain containing 1 like	-0.889109	0.012123
FSIP2	401024	fibrous sheath interacting protein 2	-2.6271	0.00718798
FSTL1	11167	follistatin like 1	0.413482	0.0197697
FUT11	170384	fucosyltransferase 11	0.362047	0.0369975
G0S2	50486	G0/G1 switch 2	2.89558	0.0169145
G2E3	55632	G2/M-phase specific E3 ubiquitin protein ligase	0.603171	0.0251494
GABPB1-IT1	55056	GABPB1 intronic transcript	-0.608675	0.0406639
GABPB2	126626	GA binding protein transcription factor subunit beta 2	0.922561	0.0477155
GABRG2	2566	gamma-aminobutyric acid type A receptor gamma2 subunit	-1.96474	0.0121982
GAPDH	2597	glyceraldehyde-3-phosphate dehydrogenase	0.352476	0.0214064
GAR1	54433	GAR1 ribonucleoprotein	-0.396208	0.0484871
GATAD2B	57459	GATA zinc finger domain containing 2B	0.517313	0.00419059
GBGT1	26301	globoside alpha-1,3-N-acetylgalactosaminyltransferase 1 (FORS blood group)	0.4983	0.0499844
GCC1	79571	GRIP and coiled-coil domain containing 1	0.328731	0.0134412
GCN1	10985	GCN1 activator of EIF2AK4	0.716281	0.00103521
GDAP1	54332	ganglioside induced differentiation associated protein 1	-0.644677	0.0432334
GDAP2	54834	ganglioside induced differentiation associated protein 2	0.631922	0.00536495
GDI2	2665	GDP dissociation inhibitor 2	0.421906	0.000904638
GEMIN5	25929	gem nuclear organelle associated protein 5	0.33878	0.0465288
GET1	7485	guided entry of tail-anchored proteins factor 1	-0.271418	0.0438928
GFOD2	81577	glucose-fructose oxidoreductase domain containing 2	-0.290064	0.0454047
GID4	79018	GID complex subunit 4 homolog	0.366955	0.0176226
GLE1	2733	GLE1 RNA export mediator	0.343733	0.0436871
GLOD4	51031	glyoxalase domain containing 4	-0.403663	0.00258817
GLRX	2745	glutaredoxin	-0.400813	0.0192239
GLTP	51228	glycolipid transfer protein	0.329546	0.0113944
GNL3L	54552	G protein nucleolar 3 like	0.365796	0.0466001
GOLGA3	2802	golgin A3	0.780597	0.003972
GOLGA4	2803	golgin A4	0.80682	0.00138704
GOLGA6L5P	374650	golgin A6 family like 5, pseudogene	-1.47499	0.00348687
GPAM	57678	glycerol-3-phosphate acyltransferase, mitochondrial	0.342133	0.0392202
GPATCH2	55105	G-patch domain containing 2	0.488305	0.022179
GPD1L	23171	glycerol-3-phosphate dehydrogenase 1 like	0.462636	0.0361313
GPI	2821	glucose-6-phosphate isomerase	0.567036	0.000588403
GPR155	151556	G protein-coupled receptor 155	1.00051	0.0106664
GPR89A	653519	G protein-coupled receptor 89A	-0.599782	0.00725409
GPRC5A	9052	G protein-coupled receptor class C group 5 member A	2.13872	0.000678008
GSDME	1687	gasdermin E	-0.300466	0.0275073
GSTCD	79807	glutathione S-transferase C-terminal domain containing	0.521638	0.0271631
GTF3C1	2975	general transcription factor IIIC subunit 1	0.396998	0.0395219
GTF3C2	2976	general transcription factor IIIC subunit 2	-0.323216	0.0373149
GTPBP2	54676	GTP binding protein 2	-0.52857	0.00163785
GTSE1	51512	G2 and S-phase expressed 1	0.91265	0.0194986
GUCD1	83606	guanylyl cyclase domain containing 1	0.319759	0.046691
H1-0	3005	H1.0 linker histone	0.826785	0.000308401
H1-2	3006	H1.2 linker histone, cluster member	0.940601	0.00536584
H2AC19	723790	H2A clustered histone 19	1.68686	0.000445161
H2AC6	8334	H2A clustered histone 6	1.20606	0.00657511
H2AX	3014	H2A.X variant histone	0.442077	0.0173184
H2BC21	8349	H2B clustered histone 21	1.67482	0.0111643
HAGHL	84264	hydroxyacylglutathione hydrolase like	1.17333	0.0264715
HBP1	26959	HMG-box transcription factor 1	-0.468145	0.0111072
HDHD5	27440	haloacid dehalogenase like hydrolase domain containing 5	-0.352654	0.0260534
HDLBP	3069	high density lipoprotein binding protein	0.628917	7.1251e-05
HEATR6	63897	HEAT repeat containing 6	0.426513	0.0360982
HECA	51696	hdc homolog, cell cycle regulator	0.351906	0.0227164
HEG1	57493	heart development protein with EGF like domains 1	0.495884	0.0369198
HELLPAR	101101692	HELLP associated long non-coding RNA	-1.8992	0.028591
HELLS	3070	helicase, lymphoid specific	-0.622556	0.0437407
HEMK1	51409	HemK methyltransferase family member 1	0.594006	0.0145473
HERC1	8925	HECT and RLD domain containing E3 ubiquitin protein ligase family member 1	-0.512085	0.017813
HERC2P9	440248	hect domain and RLD 2 pseudogene 9	-1.52355	0.0160824
HERPUD1	9709	homocysteine inducible ER protein with ubiquitin like domain 1	0.494316	0.00181506
HES1	3280	hes family bHLH transcription factor 1	0.334856	0.0426034
HES4	57801	hes family bHLH transcription factor 4	1.25088	0.000847979
HEXIM1	10614	HEXIM P-TEFb complex subunit 1	0.344007	0.00480247
HHIP-AS1	646576	HHIP antisense RNA 1	-0.574119	0.00106773
HIF1AN	55662	hypoxia inducible factor 1 subunit alpha inhibitor	0.424763	0.013403
HIGD1A	25994	HIG1 hypoxia inducible domain family member 1A	-0.282059	0.0406413
HILPDA	29923	hypoxia inducible lipid droplet associated	1.64952	0.0021728
HIP1	3092	huntingtin interacting protein 1	0.476885	0.0100801
HIPK1	204851	homeodomain interacting protein kinase 1	0.356123	0.0103311
HK2	3099	hexokinase 2	1.44663	0.000194919
HMGB2	3148	high mobility group box 2	0.595079	0.0329406
HMGB3	3149	high mobility group box 3	-0.441655	0.0192525
HNRNPC	3183	heterogeneous nuclear ribonucleoprotein C	0.49913	0.0100202
HNRNPD	3184	heterogeneous nuclear ribonucleoprotein D	-0.34903	0.0316095
HNRNPDL	9987	heterogeneous nuclear ribonucleoprotein D like	-0.574274	0.00330408
HOXB3	3213	homeobox B3	-0.984278	0.00191619
HP1BP3	50809	heterochromatin protein 1 binding protein 3	-0.440607	0.0027789
HPCAL1	3241	hippocalcin like 1	0.350822	0.016162
HPS1	3257	HPS1 biogenesis of lysosomal organelles complex 3 subunit 1	-0.399996	0.00900174
HSF1	3297	heat shock transcription factor 1	0.308606	0.00555656
HSP90AA1	3320	heat shock protein 90 alpha family class A member 1	1.24451	1.95372e-05
HSP90AB1	3326	heat shock protein 90 alpha family class B member 1	0.388212	0.0018354
HSP90B1	7184	heat shock protein 90 beta family member 1	0.572034	0.000616382
HSPA1A	3303	heat shock protein family A (Hsp70) member 1A	2.20382	0.000758913
HSPA1B	3304	heat shock protein family A (Hsp70) member 1B	1.73526	0.000332866
HSPA5	3309	heat shock protein family A (Hsp70) member 5	1.04934	0.000212349
HSPA6	3310	heat shock protein family A (Hsp70) member 6	3.20846	0.00214523
HSPA7	3311	heat shock protein family A (Hsp70) member 7	3.49167	0.00410872
HSPA8	3312	heat shock protein family A (Hsp70) member 8	0.610668	0.00134712
HSPB11	51668	heat shock protein family B (small) member 11	-0.373096	0.0424366
HSPD1	3329	heat shock protein family D (Hsp60) member 1	0.564307	0.00189065
HSPH1	10808	heat shock protein family H (Hsp110) member 1	0.958837	4.55862e-05
HTATSF1	27336	HIV-1 Tat specific factor 1	0.308496	0.0150059
HTR7P1	93164	5-hydroxytryptamine receptor 7 pseudogene 1	-0.632631	0.0370374
HVCN1	84329	hydrogen voltage gated channel 1	0.862872	0.0128078
HYAL2	8692	hyaluronidase 2	-0.311432	0.0438909
HYI	81888	hydroxypyruvate isomerase (putative)	0.550411	0.01725
HYOU1	10525	hypoxia up-regulated 1	0.467389	0.00155214
IARS1	3376	isoleucyl-tRNA synthetase 1	0.401021	0.0398317
ICAM3	3385	intercellular adhesion molecule 3	0.564025	0.0462703
ICMT	23463	isoprenylcysteine carboxyl methyltransferase	0.28366	0.022171
IDE	3416	insulin degrading enzyme	0.284004	0.0379033
IDH3B	3420	isocitrate dehydrogenase (NAD(+)) 3 non-catalytic subunit beta	-0.321554	0.015106
IDS	3423	iduronate 2-sulfatase	-0.348185	0.00913798
IER3IP1	51124	immediate early response 3 interacting protein 1	-0.304054	0.0237737
IER5	51278	immediate early response 5	0.519293	0.00838096
IER5L	389792	immediate early response 5 like	1.12853	0.00264312
IFFO1	25900	intermediate filament family orphan 1	-0.378179	0.0397833
IFRD1	3475	interferon related developmental regulator 1	-0.447793	0.00430832
IFT140	9742	intraflagellar transport 140	0.562507	0.0253043
IFT172	26160	intraflagellar transport 172	0.782058	0.0065907
IFT46	56912	intraflagellar transport 46	0.439069	0.00222471
IGF2BP2	10644	insulin like growth factor 2 mRNA binding protein 2	0.305772	0.0293991
IGFBP3	3486	insulin like growth factor binding protein 3	1.13788	0.0315585
IGHMBP2	3508	immunoglobulin mu DNA binding protein 2	0.678913	0.0466869
IKBKE	9641	inhibitor of nuclear factor kappa B kinase subunit epsilon	-0.326935	0.0473026
IL10RB	3588	interleukin 10 receptor subunit beta	0.320207	0.034027
IL21R	50615	interleukin 21 receptor	1.08828	0.0288835
ILRUN	64771	inflammation and lipid regulator with UBA-like and NBR1-like domains	0.250161	0.0129338
IMPDH2	3615	inosine monophosphate dehydrogenase 2	0.55707	0.00623351
INF2	64423	inverted formin, FH2 and WH2 domain containing	0.328874	0.0320907
ING1	3621	inhibitor of growth family member 1	0.544527	0.00807272
INPP5A	3632	inositol polyphosphate-5-phosphatase A	0.481484	0.0283578
INPP5D	3635	inositol polyphosphate-5-phosphatase D	0.356195	0.0439311
INSIG1	3638	insulin induced gene 1	0.388788	0.0370364
INTS13	55726	integrator complex subunit 13	0.649298	0.00114266
INTS3	65123	integrator complex subunit 3	0.435509	0.0180388
INTS6	26512	integrator complex subunit 6	0.354791	0.0200159
IQGAP3	128239	IQ motif containing GTPase activating protein 3	1.0032	0.0375073
IRGQ	126298	immunity related GTPase Q	-0.342702	0.0289905
ITPRID2	6744	ITPR interacting domain containing 2	-0.300585	0.0417772
ITPRIPL2	162073	ITPRIP like 2	0.472097	0.00590802
JKAMP	51528	JNK1/MAPK8 associated membrane protein	-0.401781	0.00707179
JMJD4	65094	jumonji domain containing 4	-0.364964	0.0198425
JRKL	8690	JRK like	0.31441	0.0386177
JUND	3727	JunD proto-oncogene, AP-1 transcription factor subunit	0.441306	0.0198653
KANK1	23189	KN motif and ankyrin repeat domains 1	0.50596	0.0323705
KANK2	25959	KN motif and ankyrin repeat domains 2	0.305553	0.0342877
KANTR	102723508	KDM5C adjacent transcript	-1.16783	0.032425
KAT5	10524	lysine acetyltransferase 5	-0.302088	0.0480407
KAT8	84148	lysine acetyltransferase 8	-0.32842	0.023499
KBTBD6	89890	kelch repeat and BTB domain containing 6	0.687756	0.000317938
KBTBD7	84078	kelch repeat and BTB domain containing 7	0.630436	0.00652113
KCNJ2-AS1	400617	KCNJ2 antisense RNA 1	-0.912956	0.0344535
KCNQ1OT1	10984	KCNQ1 opposite strand/antisense transcript 1	-1.58915	0.0481883
KCTD17	79734	potassium channel tetramerization domain containing 17	0.281369	0.0471552
KCTD9	54793	potassium channel tetramerization domain containing 9	-0.511243	0.00436892
KDELR2	11014	KDEL endoplasmic reticulum protein retention receptor 2	0.419985	0.00323817
KDM1B	221656	lysine demethylase 1B	0.492376	0.00418245
KDM3A	55818	lysine demethylase 3A	0.307686	0.0496476
KDM5A	5927	lysine demethylase 5A	0.961231	0.00011575
KDM6A	7403	lysine demethylase 6A	-0.561242	0.0212748
KEAP1	9817	kelch like ECH associated protein 1	0.336527	0.0199445
KIAA1328	57536	KIAA1328	-1.20585	0.0288308
KIAA2026	158358	KIAA2026	0.803978	0.0014601
KIF11	3832	kinesin family member 11	0.681193	0.0317155
KIF15	56992	kinesin family member 15	1.37797	0.00444323
KIF20B	9585	kinesin family member 20B	1.20344	0.000914257
KIF3B	9371	kinesin family member 3B	0.341354	0.00235433
KIF5B	3799	kinesin family member 5B	0.272853	0.0144408
KIF9	64147	kinesin family member 9	-0.442461	0.0157965
KLF6	1316	Kruppel like factor 6	0.315017	0.00271329
KLF7	8609	Kruppel like factor 7	0.620074	0.00222924
KLHDC2	23588	kelch domain containing 2	-0.301542	0.0237297
KLHL17	339451	kelch like family member 17	-0.932338	0.043371
KLHL26	55295	kelch like family member 26	-0.660067	0.0377359
KLHL8	57563	kelch like family member 8	0.561365	0.00106021
KMT2E	55904	lysine methyltransferase 2E	0.685442	0.00269222
KNOP1	400506	lysine rich nucleolar protein 1	0.586521	0.00145874
KPNA4	3840	karyopherin subunit alpha 4	0.332576	0.0330608
KPNA5	3841	karyopherin subunit alpha 5	-0.88043	0.0267938
KPNB1	3837	karyopherin subunit beta 1	0.307046	0.0119907
KRT18	3875	keratin 18	0.507589	0.0327539
KRT7	3855	keratin 7	0.62961	0.0252121
KSR1	8844	kinase suppressor of ras 1	-0.532623	0.0272501
KTN1	3895	kinectin 1	0.537078	0.00732224
L2HGDH	79944	L-2-hydroxyglutarate dehydrogenase	-0.981054	0.00776088
LARGE1	9215	LARGE xylosyl- and glucuronyltransferase 1	1.29235	0.034913
LARP4	113251	La ribonucleoprotein 4	0.315159	0.0366141
LARP6	55323	La ribonucleoprotein 6, translational regulator	-0.656187	0.00706972
LARP7	51574	La ribonucleoprotein 7, transcriptional regulator	0.35451	0.0438205
LCA5	167691	lebercilin LCA5	0.388643	0.0468735
LDHA	3939	lactate dehydrogenase A	0.760525	0.00269987
LDHAP3	442013	lactate dehydrogenase A pseudogene 3	1.50259	0.022972
LERFS	403323	lncRNA negative regulator of fibroblast-like synoviocyte migration, SYNCRIP interacting	-2.16329	0.0461821
LETM1	3954	leucine zipper and EF-hand containing transmembrane protein 1	0.321941	0.0312772
LIFR-AS1	100506495	LIFR antisense RNA 1	-1.62927	0.00116329
LIMD1	8994	LIM domains containing 1	0.658997	0.00151314
LIMS2	55679	LIM zinc finger domain containing 2	0.343667	0.0292088
LIMS4	100288695	LIM zinc finger domain containing 4	-0.910569	0.00997237
LIN7C	55327	lin-7 homolog C, crumbs cell polarity complex component	0.566827	0.0078534
LINC00343	144920	long intergenic non-protein coding RNA 343	-1.58023	0.0460601
LINC00863	439994	long intergenic non-protein coding RNA 863	-0.435121	0.0244687
LINC01089	338799	long intergenic non-protein coding RNA 1089	-0.925235	0.0172058
LINC01547	84536	long intergenic non-protein coding RNA 1547	-0.696491	0.0388179
LINC01608	101927459	long intergenic non-protein coding RNA 1608	-2.26866	0.0142154
LINC01670	105379487	long intergenic non-protein coding RNA 1670	-1.27673	0.0280435
LINC02035	100129550	long intergenic non-protein coding RNA 2035	-0.609744	0.0360533
LINC02669	101927880	long intergenic non-protein coding RNA 2669	-0.969959	0.0397555
LIX1L	128077	limb and CNS expressed 1 like	-0.339842	0.0103511
LLGL1	3996	LLGL scribble cell polarity complex component 1	-0.362347	0.0193573
LLGL2	3993	LLGL scribble cell polarity complex component 2	-0.7313	0.0240705
LMAN1	3998	lectin, mannose binding 1	0.32519	0.0356985
LMBR1L	55716	limb development membrane protein 1 like	-0.555794	0.00510167
LONP2	83752	lon peptidase 2, peroxisomal	0.361649	0.0244935
LPCAT3	10162	lysophosphatidylcholine acyltransferase 3	-0.40651	0.0386455
LPP-AS2	339929	LPP antisense RNA 2	-0.677301	0.0118213
LRCH2	57631	leucine rich repeats and calponin homology domain containing 2	0.484716	0.0121686
LRP11	84918	LDL receptor related protein 11	0.665388	0.000555468
LRP8	7804	LDL receptor related protein 8	-0.549259	0.0482495
LRPPRC	10128	leucine rich pentatricopeptide repeat containing	0.660552	0.000814665
LRRC37BP1	147172	leucine rich repeat containing 37B pseudogene 1	0.537397	0.0137054
LRRC59	55379	leucine rich repeat containing 59	0.324134	0.0390816
LRRC70	100130733	leucine rich repeat containing 70	-0.858543	2.03557e-06
LRRK2	120892	leucine rich repeat kinase 2	1.72705	0.0395553
LSM11	134353	LSM11, U7 small nuclear RNA associated	0.500791	0.0112274
LSM12	124801	LSM12 homolog	0.314436	0.00294072
LSM8	51691	LSM8 homolog, U6 small nuclear RNA associated	-0.421449	0.0194561
LTO1	220064	LTO1 maturation factor of ABCE1	-0.627123	0.00400158
LUC7L3	51747	LUC7 like 3 pre-mRNA splicing factor	0.686807	0.000115435
LYPLA1	10434	lysophospholipase 1	-0.381648	0.0212451
LYRM2	57226	LYR motif containing 2	-0.329653	0.0300453
LYRM7	90624	LYR motif containing 7	0.579077	0.0475119
LYRM9	201229	LYR motif containing 9	-1.25958	0.00195534
LYSMD4	145748	LysM domain containing 4	-0.586555	0.0311268
LZIC	84328	leucine zipper and CTNNBIP1 domain containing	0.336247	0.0264458
MAGEF1	64110	MAGE family member F1	-0.5573	0.0139898
MALAT1	378938	metastasis associated lung adenocarcinoma transcript 1	1.97465	0.00462986
MAN2C1	4123	mannosidase alpha class 2C member 1	-0.537633	0.00442187
MANBAL	63905	mannosidase beta like	-0.465129	0.000668012
MANF	7873	mesencephalic astrocyte derived neurotrophic factor	0.606018	0.0217785
MAP1B	4131	microtubule associated protein 1B	1.24478	0.000341191
MAP2K2	5605	mitogen-activated protein kinase kinase 2	0.268634	0.0341266
MAP3K8	1326	mitogen-activated protein kinase kinase kinase 8	-0.627443	0.0459915
MAP4K4	9448	mitogen-activated protein kinase kinase kinase kinase 4	0.302562	0.0289271
MAPK8IP3	23162	mitogen-activated protein kinase 8 interacting protein 3	-1.19801	3.6398e-05
MAPKAPK3	7867	MAPK activated protein kinase 3	-0.424826	0.00779161
MARCHF7	64844	membrane associated ring-CH-type finger 7	-0.385254	0.0114194
MAST3	23031	microtubule associated serine/threonine kinase 3	0.802129	0.0110512
MCCC2	64087	methylcrotonoyl-CoA carboxylase 2	-0.368965	0.0358982
MED13	9969	mediator complex subunit 13	0.31596	0.0250408
MED17	9440	mediator complex subunit 17	-0.441896	0.0379691
MED25	81857	mediator complex subunit 25	-0.42652	0.00425366
MED4	29079	mediator complex subunit 4	-0.547783	0.00315995
MED9	55090	mediator complex subunit 9	-0.627903	0.0107474
METAP2	10988	methionyl aminopeptidase 2	0.39239	0.00169574
METRN	79006	meteorin, glial cell differentiation regulator	0.678865	0.0471094
METTL23	124512	methyltransferase like 23	-0.391104	0.0407413
MEX3D	399664	mex-3 RNA binding family member D	0.445749	0.000797789
MFHAS1	9258	malignant fibrous histiocytoma amplified sequence 1	0.535215	0.0202148
MFSD12	126321	major facilitator superfamily domain containing 12	0.55565	0.00225756
MGLL	11343	monoglyceride lipase	0.463356	0.00787705
MIB2	142678	mindbomb E3 ubiquitin protein ligase 2	0.543459	0.0209363
MICALL1	85377	MICAL like 1	0.455725	0.00239478
MICALL2	79778	MICAL like 2	-0.558098	0.00253482
MIER1	57708	MIER1 transcriptional regulator	0.348895	0.0473647
MINDY2	54629	MINDY lysine 48 deubiquitinase 2	0.785125	9.09056e-05
MIR1915HG	399726	MIR1915 host gene	0.819813	0.00462393
MIR663AHG	284801	MIR663A host gene	1.03501	0.0185793
MKI67	4288	marker of proliferation Ki-67	1.69193	0.00832503
MKLN1	4289	muskelin 1	0.395683	0.00607215
MLLT1	4298	MLLT1 super elongation complex subunit	0.313564	0.0152835
MLLT11	10962	MLLT11 transcription factor 7 cofactor	-0.581565	0.0022083
MLXIP	22877	MLX interacting protein	0.503873	0.00117218
MMP24OS	101410538	MMP24 opposite strand	-0.252318	0.0143125
MMP25-AS1	100507419	MMP25 antisense RNA 1	-1.01774	0.00574032
MMS19	64210	MMS19 homolog, cytosolic iron-sulfur assembly component	0.413583	0.0129727
MOAP1	64112	modulator of apoptosis 1	-0.425246	0.0488083
MON1A	84315	MON1 homolog A, secretory trafficking associated	0.428521	0.00570408
MORC2	22880	MORC family CW-type zinc finger 2	0.434118	0.0172936
MOSMO	730094	modulator of smoothened	-0.321339	0.0202649
MPHOSPH6	10200	M-phase phosphoprotein 6	-0.348098	0.0295856
MPHOSPH8	54737	M-phase phosphoprotein 8	0.740537	0.00016308
MPPE1	65258	metallophosphoesterase 1	-0.670962	0.00176095
MROH1	727957	maestro heat like repeat family member 1	-0.254169	0.0429698
MRPL40	64976	mitochondrial ribosomal protein L40	-0.319172	0.0443157
MRPL50	54534	mitochondrial ribosomal protein L50	-0.307533	0.0291295
MRPL55	128308	mitochondrial ribosomal protein L55	-0.473849	0.0202755
MRPS36	92259	mitochondrial ribosomal protein S36	-0.441994	0.0311225
MRPS5	64969	mitochondrial ribosomal protein S5	0.277074	0.0313337
MSH6	2956	mutS homolog 6	0.418927	0.0133158
MSL3	10943	MSL complex subunit 3	0.382841	0.00609374
MSMO1	6307	methylsterol monooxygenase 1	0.368606	0.0281213
MT1E	4493	metallothionein 1E	1.59716	0.0110647
MT1M	4499	metallothionein 1M	2.56162	0.0102305
MT1X	4501	metallothionein 1X	2.50193	0.00872405
MT2A	4502	metallothionein 2A	0.91133	0.0381208
MTCP1	4515	mature T cell proliferation 1	-1.36995	0.00851656
MTDH	92140	metadherin	0.848711	7.10686e-05
MTERF4	130916	mitochondrial transcription termination factor 4	-0.325477	0.0364424
MTMR9	66036	myotubularin related protein 9	0.420801	0.0133948
MTO1	25821	mitochondrial tRNA translation optimization 1	0.352446	0.0421977
MTRF1L	54516	mitochondrial translational release factor 1 like	0.344308	0.0253915
MYCBP	26292	MYC binding protein	0.625492	0.00541161
MYH9	4627	myosin heavy chain 9	0.361483	0.0228997
MYL12A	10627	myosin light chain 12A	-0.345454	0.026527
MYO18A	399687	myosin XVIIIA	0.478156	0.0398728
MYO1E	4643	myosin IE	0.442379	0.0106525
MYO6	4646	myosin VI	0.291928	0.0335651
MYO9A	4649	myosin IXA	0.530004	0.0199237
NAA15	80155	N(alpha)-acetyltransferase 15, NatA auxiliary subunit	0.51183	0.00382153
NAA40	79829	N(alpha)-acetyltransferase 40, NatD catalytic subunit	-0.600797	0.0247321
NACAD	23148	NAC alpha domain containing	1.29847	0.00554064
NADK2	133686	NAD kinase 2, mitochondrial	0.443083	0.0108433
NAE1	8883	NEDD8 activating enzyme E1 subunit 1	-0.306352	0.01872
NAGLU	4669	N-acetyl-alpha-glucosaminidase	-0.466639	0.0412245
NAIP	4671	NLR family apoptosis inhibitory protein	-1.40271	0.0180165
NANS	54187	N-acetylneuraminate synthase	0.278238	0.0482437
NAPA	8775	NSF attachment protein alpha	-0.348773	0.017059
NAPEPLD	222236	N-acyl phosphatidylethanolamine phospholipase D	0.958014	0.00260333
NARS2	79731	asparaginyl-tRNA synthetase 2, mitochondrial	0.57567	0.00468094
NAT10	55226	N-acetyltransferase 10	0.409351	0.00246476
NBAS	51594	NBAS subunit of NRZ tethering complex	0.631914	0.000112188
NCAPG	64151	non-SMC condensin I complex subunit G	0.924515	0.0173496
NCAPH2	29781	non-SMC condensin II complex subunit H2	0.398259	0.0359803
NCBP1	4686	nuclear cap binding protein subunit 1	0.341145	0.0397968
NCBP2AS2	152217	NCBP2 antisense 2 (head to head)	-0.516927	0.0134396
NCKAP5L	57701	NCK associated protein 5 like	-0.402118	0.0170147
NCOA1	8648	nuclear receptor coactivator 1	0.372483	0.0475277
NCOR1	9611	nuclear receptor corepressor 1	0.371515	0.0293877
NDUFA5	4698	NADH:ubiquinone oxidoreductase subunit A5	-0.34416	0.020157
NDUFS2	4720	NADH:ubiquinone oxidoreductase core subunit S2	-0.338477	0.0169569
NDUFV1	4723	NADH:ubiquinone oxidoreductase core subunit V1	0.292318	0.0397961
NEAT1	283131	nuclear paraspeckle assembly transcript 1	-0.720982	0.0137902
NEK3	4752	NIMA related kinase 3	-0.784162	0.005854
NEK8	284086	NIMA related kinase 8	-0.755335	0.0264656
NEMF	9147	nuclear export mediator factor	0.652031	0.0013179
NES	10763	nestin	0.378238	0.0356459
NEURL4	84461	neuralized E3 ubiquitin protein ligase 4	-0.642325	0.0285659
NF2	4771	neurofibromin 2	0.551879	0.000143103
NFATC3	4775	nuclear factor of activated T cells 3	0.642328	0.000254619
NFIB	4781	nuclear factor I B	0.719696	0.00529829
NFIC	4782	nuclear factor I C	0.294396	0.0423621
NFKBIZ	64332	NFKB inhibitor zeta	-1.10026	0.00363811
NHSL1	57224	NHS like 1	0.474403	0.039375
NICN1	84276	nicolin 1	0.425091	0.0218964
NINL	22981	ninein like	-0.76083	0.0443814
NKAP	79576	NFKB activating protein	0.411117	0.00640665
NKAPD1	55216	NKAP domain containing 1	0.29078	0.0447502
NLRX1	79671	NLR family member X1	0.461193	0.0260333
NMNAT3	349565	nicotinamide nucleotide adenylyltransferase 3	-1.78733	0.0209411
NMT1	4836	N-myristoyltransferase 1	0.846829	0.0012105
NOCT	25819	nocturnin	0.526423	0.0263519
NOL8	55035	nucleolar protein 8	0.454513	0.0126081
NOP9	161424	NOP9 nucleolar protein	0.433251	0.00390586
NOVA2	4858	NOVA alternative splicing regulator 2	0.418034	0.0283115
NPIPA5	100288332	nuclear pore complex interacting protein family member A5	-3.34525	0.0307995
NPIPP1	100874381	nuclear pore complex interacting protein pseudogene 1	-1.40973	0.00120265
NPTN	27020	neuroplastin	-0.253775	0.0336808
NRDC	4898	nardilysin convertase	0.288694	0.00854304
NRDE2	55051	NRDE-2, necessary for RNA interference, domain containing	0.517105	0.0224412
NRG1	3084	neuregulin 1	0.722211	0.00168422
NSD1	64324	nuclear receptor binding SET domain protein 1	0.668746	0.00122755
NT5C2	22978	5'-nucleotidase, cytosolic II	-0.316519	0.0124525
NT5C3A	51251	5'-nucleotidase, cytosolic IIIA	-0.333871	0.0229054
NUBP1	4682	nucleotide binding protein 1	-0.357944	0.0296349
NUBPL	80224	nucleotide binding protein like	-0.790179	0.0201122
NUCB2	4925	nucleobindin 2	0.537436	0.00156253
NUCKS1	64710	nuclear casein kinase and cyclin dependent kinase substrate 1	0.682936	0.00862152
NUDT19	390916	nudix hydrolase 19	0.56213	0.0116149
NUDT21	11051	nudix hydrolase 21	0.314238	0.0428495
NUP42	11097	nucleoporin 42	-0.415037	0.0206675
NUP43	348995	nucleoporin 43	0.433913	0.0147507
NUP50	10762	nucleoporin 50	0.453351	0.00757669
NUP85	79902	nucleoporin 85	-0.407228	0.0190855
NUTM2B-AS1	101060691	NUTM2B antisense RNA 1	0.391444	0.0259676
OCIAD1	54940	OCIA domain containing 1	-0.290703	0.00847654
ODF2	4957	outer dense fiber of sperm tails 2	0.311199	0.00954409
OMA1	115209	OMA1 zinc metallopeptidase	0.765618	0.00560868
OPA1	4976	OPA1 mitochondrial dynamin like GTPase	0.345309	0.0337349
OPN3	23596	opsin 3	0.450448	0.0200925
OPTN	10133	optineurin	0.456085	0.0266895
ORMDL1	94101	ORMDL sphingolipid biosynthesis regulator 1	-0.428869	0.00544943
OSCP1	127700	organic solute carrier partner 1	-0.66049	0.0129806
P2RX4	5025	purinergic receptor P2X 4	0.775328	0.0217811
P3H4	10609	prolyl 3-hydroxylase family member 4 (inactive)	0.427037	0.0243995
P4HA1	5033	prolyl 4-hydroxylase subunit alpha 1	1.04827	4.15523e-05
P4HA2	8974	prolyl 4-hydroxylase subunit alpha 2	0.604738	0.0212288
PABPC1	26986	poly(A) binding protein cytoplasmic 1	0.625017	0.000236211
PACRGL	133015	parkin coregulated like	-0.638465	0.00514689
PAFAH1B2	5049	platelet activating factor acetylhydrolase 1b catalytic subunit 2	0.485595	0.000552651
PAFAH2	5051	platelet activating factor acetylhydrolase 2	0.681954	0.00512508
PALB2	79728	partner and localizer of BRCA2	0.64521	0.0182343
PAQR7	164091	progestin and adipoQ receptor family member 7	0.568627	0.00407259
PARD3	56288	par-3 family cell polarity regulator	0.475181	0.00603593
PARP15	165631	poly(ADP-ribose) polymerase family member 15	-1.71939	0.0488873
PC	5091	pyruvate carboxylase	0.817082	0.0129069
PCBD2	84105	pterin-4 alpha-carbinolamine dehydratase 2	-0.608042	0.022425
PCDH12	51294	protocadherin 12	0.780676	0.0394932
PCIF1	63935	PDX1 C-terminal inhibiting factor 1	-0.52581	0.00187746
PCLO	27445	piccolo presynaptic cytomatrix protein	-2.1506	0.0155659
PCM1	5108	pericentriolar material 1	0.300534	0.0214237
PDCD11	22984	programmed cell death 11	0.673852	0.000321563
PDCD6	10016	programmed cell death 6	-0.280188	0.0246585
PDCL	5082	phosducin like	-0.417311	0.0266381
PDE7B	27115	phosphodiesterase 7B	-0.650745	0.0105357
PDHX	8050	pyruvate dehydrogenase complex component X	0.426186	0.0103874
PDIA4	9601	protein disulfide isomerase family A member 4	0.548055	0.000774206
PDK1	5163	pyruvate dehydrogenase kinase 1	-0.571421	0.00979083
PDLIM7	9260	PDZ and LIM domain 7	-0.290183	0.0137481
PDS5B	23047	PDS5 cohesin associated factor B	0.624644	0.00034856
PDXK	8566	pyridoxal kinase	0.376574	0.0398709
PEAR1	375033	platelet endothelial aggregation receptor 1	-0.420099	0.0246732
PELP1	27043	proline, glutamate and leucine rich protein 1	0.440092	0.0103058
PEX12	5193	peroxisomal biogenesis factor 12	0.4653	0.0239267
PEX6	5190	peroxisomal biogenesis factor 6	1.06151	0.0199333
PFDN1	5201	prefoldin subunit 1	-0.278587	0.0143548
PFKFB4	5210	6-phosphofructo-2-kinase/fructose-2,6-biphosphatase 4	1.20313	0.0271717
PGM1	5236	phosphoglucomutase 1	0.493308	0.00748653
PGM2L1	283209	phosphoglucomutase 2 like 1	0.377669	0.0123873
PGM3	5238	phosphoglucomutase 3	0.330489	0.0412721
PGS1	9489	phosphatidylglycerophosphate synthase 1	-0.394988	0.0337675
PHACTR2	9749	phosphatase and actin regulator 2	0.544629	0.0166593
PHETA1	144717	PH domain containing endocytic trafficking adaptor 1	0.349422	0.0337562
PHF14	9678	PHD finger protein 14	0.62399	0.00128215
PHF2	5253	PHD finger protein 2	-0.303961	0.0427652
PHF3	23469	PHD finger protein 3	0.391919	0.0476176
PHIP	55023	pleckstrin homology domain interacting protein	0.713783	0.000167728
PIAS1	8554	protein inhibitor of activated STAT 1	0.377508	0.0196037
PIGC	5279	phosphatidylinositol glycan anchor biosynthesis class C	-0.611674	0.00291531
PIGW	284098	phosphatidylinositol glycan anchor biosynthesis class W	-0.716213	0.00129747
PIGZ	80235	phosphatidylinositol glycan anchor biosynthesis class Z	-0.762101	0.0292949
PIK3CA	5290	phosphatidylinositol-4,5-bisphosphate 3-kinase catalytic subunit alpha	0.318755	0.0441122
PILRB	29990	paired immunoglobin like type 2 receptor beta	-1.11228	0.0258067
PIP4P1	90809	phosphatidylinositol-4,5-bisphosphate 4-phosphatase 1	-0.457816	0.0048388
PIP4P2	55529	phosphatidylinositol-4,5-bisphosphate 4-phosphatase 2	-0.734117	0.00664673
PITPNM1	9600	phosphatidylinositol transfer protein membrane associated 1	0.964785	0.00815225
PKM	5315	pyruvate kinase M1/2	0.26819	0.031264
PKN1	5585	protein kinase N1	0.276555	0.0146627
PLAG1	5324	PLAG1 zinc finger	0.665443	0.0352533
PLCB3	5331	phospholipase C beta 3	0.380957	0.00258958
PLCG1	5335	phospholipase C gamma 1	-0.372515	0.0345944
PLEKHA6	22874	pleckstrin homology domain containing A6	0.943454	0.00660132
PLEKHG5	57449	pleckstrin homology and RhoGEF domain containing G5	-0.427014	0.0185962
PLEKHH3	79990	pleckstrin homology, MyTH4 and FERM domain containing H3	-0.776672	0.0157988
PLIN2	123	perilipin 2	0.715696	0.00386246
PLOD2	5352	procollagen-lysine,2-oxoglutarate 5-dioxygenase 2	0.619888	0.00479731
PLPBP	11212	pyridoxal phosphate binding protein	0.414619	0.0161808
PLSCR3	57048	phospholipid scramblase 3	-0.272079	0.0404148
PMF1	11243	polyamine modulated factor 1	-0.614231	0.00060993
PMF1-BGLAP	100527963	PMF1-BGLAP readthrough	1.254	0.0114907
PMM2	5373	phosphomannomutase 2	-0.531561	0.00122641
PNMA6A	84968	PNMA family member 6A	-1.63017	0.0302084
PNPLA6	10908	patatin like phospholipase domain containing 6	0.721124	0.000678727
PNPLA8	50640	patatin like phospholipase domain containing 8	0.324759	0.0140128
PNPO	55163	pyridoxamine 5'-phosphate oxidase	0.729945	0.00064744
POLA1	5422	DNA polymerase alpha 1, catalytic subunit	0.402364	0.0320544
POLD2	5425	DNA polymerase delta 2, accessory subunit	0.289608	0.0454497
POLI	11201	DNA polymerase iota	-0.546718	0.0142142
POLR1B	84172	RNA polymerase I subunit B	0.572078	0.0083248
POLR2K	5440	RNA polymerase II subunit K	-0.362222	0.00603621
POLR2M	81488	RNA polymerase II subunit M	0.397514	0.0160358
POLR3D	661	RNA polymerase III subunit D	0.527889	0.0043026
POLRMT	5442	RNA polymerase mitochondrial	1.0715	0.00367918
POMK	84197	protein O-mannose kinase	-0.809147	0.0402214
PORCN	64840	porcupine O-acyltransferase	-0.542123	0.0179723
POU2F2	5452	POU class 2 homeobox 2	1.63705	0.000377423
PPA1	5464	inorganic pyrophosphatase 1	0.345613	0.0117614
PPA2	27068	inorganic pyrophosphatase 2	-0.324184	0.0278569
PPHLN1	51535	periphilin 1	-0.269985	0.0408311
PPIG	9360	peptidylprolyl isomerase G	0.595795	0.000252566
PPOX	5498	protoporphyrinogen oxidase	-0.457081	0.0456463
PPP1CB	5500	protein phosphatase 1 catalytic subunit beta	0.550335	0.00183982
PPP1R12A	4659	protein phosphatase 1 regulatory subunit 12A	0.650997	0.00623009
PPP1R3C	5507	protein phosphatase 1 regulatory subunit 3C	0.746591	0.0316992
PPP2R5E	5529	protein phosphatase 2 regulatory subunit B'epsilon	0.363667	0.0100734
PPP3CA	5530	protein phosphatase 3 catalytic subunit alpha	0.409189	0.0414956
PPP4R3A	55671	protein phosphatase 4 regulatory subunit 3A	0.264493	0.0303936
PPP5C	5536	protein phosphatase 5 catalytic subunit	-0.354523	0.0105049
PPT2	9374	palmitoyl-protein thioesterase 2	-0.397648	0.0457956
PRELID3B	51012	PRELI domain containing 3B	0.296671	0.0354604
PREPL	9581	prolyl endopeptidase like	0.639149	0.000542722
PREX2	80243	phosphatidylinositol-3,4,5-trisphosphate dependent Rac exchange factor 2	0.656164	0.0080621
PRICKLE2	166336	prickle planar cell polarity protein 2	0.677279	0.024406
PRKAR2A	5576	protein kinase cAMP-dependent type II regulatory subunit alpha	0.479934	0.00257377
PRKG1-AS1	100506939	PRKG1 antisense RNA 1	-1.89065	0.0320223
PRMT9	90826	protein arginine methyltransferase 9	-0.416895	0.0242712
PRPF3	9129	pre-mRNA processing factor 3	0.320519	0.044843
PRPF40A	55660	pre-mRNA processing factor 40 homolog A	0.718109	0.000892604
PRPF6	24148	pre-mRNA processing factor 6	0.408656	0.000748687
PRPF8	10594	pre-mRNA processing factor 8	0.416017	0.00185953
PRPS1	5631	phosphoribosyl pyrophosphate synthetase 1	-0.358082	0.0222422
PRPSAP1	5635	phosphoribosyl pyrophosphate synthetase associated protein 1	-0.380292	0.0337394
PSMD1	5707	proteasome 26S subunit, non-ATPase 1	0.465254	0.0180513
PSMD11	5717	proteasome 26S subunit, non-ATPase 11	-0.285503	0.0435562
PTEN	5728	phosphatase and tensin homolog	0.407265	0.0276478
PTP4A2	8073	protein tyrosine phosphatase 4A2	0.527127	0.00373866
PTPN14	5784	protein tyrosine phosphatase non-receptor type 14	0.62539	0.0024832
PTPRF	5792	protein tyrosine phosphatase receptor type F	0.423711	0.028777
PURA	5813	purine rich element binding protein A	0.473229	0.00606963
PUS3	83480	pseudouridine synthase 3	0.422402	0.0206856
PXK	54899	PX domain containing serine/threonine kinase like	0.340777	0.0451232
PYCR1	5831	pyrroline-5-carboxylate reductase 1	0.367786	0.0171078
PYGL	5836	glycogen phosphorylase L	0.572766	0.00287041
R3HCC1L	27291	R3H domain and coiled-coil containing 1 like	0.385468	0.0498357
R3HDM1	23518	R3H domain containing 1	0.364661	0.0163631
R3HDM2	22864	R3H domain containing 2	0.400882	0.0260025
RAB11FIP5	26056	RAB11 family interacting protein 5	0.258014	0.0401392
RAB31	11031	RAB31, member RAS oncogene family	0.374226	0.0380111
RAB33B	83452	RAB33B, member RAS oncogene family	0.387503	0.0300642
RABL6	55684	RAB, member RAS oncogene family like 6	0.410573	0.000520808
RAC1	5879	Rac family small GTPase 1	0.364151	0.0209318
RAD50	10111	RAD50 double strand break repair protein	0.702259	6.71742e-05
RAD54L2	23132	RAD54 like 2	0.759178	0.00260341
RALBP1	10928	ralA binding protein 1	0.625388	1.49323e-05
RALGDS	5900	ral guanine nucleotide dissociation stimulator	-0.636635	0.0195339
RANGAP1	5905	Ran GTPase activating protein 1	0.459313	0.000247948
RAP1GDS1	5910	Rap1 GTPase-GDP dissociation stimulator 1	0.348551	0.00386074
RASA2	5922	RAS p21 protein activator 2	-0.546176	0.014857
RASAL2-AS1	100302401	RASAL2 antisense RNA 1	-1.53713	0.021913
RASIP1	54922	Ras interacting protein 1	0.454244	0.000544344
RASSF8-AS1	100506451	RASSF8 antisense RNA 1	-0.584103	0.0196718
RB1CC1	9821	RB1 inducible coiled-coil 1	0.587758	0.000825681
RBBP5	5929	RB binding protein 5, histone lysine methyltransferase complex subunit	0.446384	0.00522158
RBM10	8241	RNA binding motif protein 10	0.620126	6.12383e-05
RBM18	92400	RNA binding motif protein 18	0.436333	0.00568985
RBM19	9904	RNA binding motif protein 19	0.281877	0.0341597
RBM24	221662	RNA binding motif protein 24	-0.561415	0.0314106
RBM25	58517	RNA binding motif protein 25	0.46856	0.00143599
RBM3	5935	RNA binding motif protein 3	-0.78201	3.69773e-05
RBM33	155435	RNA binding motif protein 33	0.291704	0.0172556
RBMX2	51634	RNA binding motif protein X-linked 2	0.355117	0.0185307
RCC1	1104	regulator of chromosome condensation 1	0.566309	7.75126e-05
RCE1	9986	Ras converting CAAX endopeptidase 1	-0.350912	0.0332141
RDH11	51109	retinol dehydrogenase 11	0.331934	0.0142549
RDH13	112724	retinol dehydrogenase 13	-0.685322	0.0419216
REEP3	221035	receptor accessory protein 3	0.353322	0.0234366
RELB	5971	RELB proto-oncogene, NF-kB subunit	0.586912	0.0307328
RELL1	768211	RELT like 1	0.647975	0.000463818
REPIN1	29803	replication initiator 1	-0.547077	0.0179418
REPS2	9185	RALBP1 associated Eps domain containing 2	1.01435	0.00807844
REST	5978	RE1 silencing transcription factor	0.460142	0.0212217
RETREG3	162427	reticulophagy regulator family member 3	0.385108	0.0164047
RFC1	5981	replication factor C subunit 1	0.596553	0.0141729
RFLNB	359845	refilin B	0.465288	0.0306448
RFT1	91869	RFT1 homolog	0.505122	0.000559449
RFTN1	23180	raftlin, lipid raft linker 1	0.258165	0.0322786
RFX3	5991	regulatory factor X3	0.724595	0.0022021
RFXAP	5994	regulatory factor X associated protein	-0.805189	0.00830565
RGS3	5998	regulator of G protein signaling 3	0.287812	0.0197877
RHBDD1	84236	rhomboid domain containing 1	0.545187	0.00370348
RHBDD3	25807	rhomboid domain containing 3	-0.397651	0.00617886
RHOF	54509	ras homolog family member F, filopodia associated	0.508739	0.012807
RHOT2	89941	ras homolog family member T2	-0.384994	0.0167935
RIC1	57589	RIC1 homolog, RAB6A GEF complex partner 1	0.323198	0.0257486
RIF1	55183	replication timing regulatory factor 1	0.4348	0.00228038
RINL	126432	Ras and Rab interactor like	0.760534	0.0177653
RMND5A	64795	required for meiotic nuclear division 5 homolog A	0.529133	0.00354863
RN7SL1	6029	RNA component of signal recognition particle 7SL1	-0.697794	0.0035387
RN7SL2	378706	RNA component of signal recognition particle 7SL2	-0.807301	0.00836866
RNASEL	6041	ribonuclease L	0.591234	0.0162456
RNF144B	255488	ring finger protein 144B	0.637658	0.00219167
RNF168	165918	ring finger protein 168	0.849963	7.99411e-05
RNF169	254225	ring finger protein 169	0.832375	0.00082677
RNF20	56254	ring finger protein 20	0.449472	0.00991937
RNF215	200312	ring finger protein 215	-0.456924	0.0256938
RO60	6738	Ro60, Y RNA binding protein	0.824757	1.35933e-05
ROCK1	6093	Rho associated coiled-coil containing protein kinase 1	0.328251	0.00788109
RPAP2	79871	RNA polymerase II associated protein 2	0.517996	0.027907
RPE	6120	ribulose-5-phosphate-3-epimerase	0.33748	0.0210078
RPL32P29	729215	ribosomal protein L32 pseudogene 29	0.894797	0.00261447
RPL32P3	132241	ribosomal protein L32 pseudogene 3	1.71284	0.00316071
RPS6KA4	8986	ribosomal protein S6 kinase A4	-0.250306	0.0326391
RPUSD2	27079	RNA pseudouridine synthase domain containing 2	-0.570018	0.0481023
RRAD	6236	RRAD, Ras related glycolysis inhibitor and calcium channel regulator	3.82061	0.00139249
RRAS	6237	RAS related	0.52374	0.00932188
RRM2	6241	ribonucleotide reductase regulatory subunit M2	0.955753	0.0305668
RRP12	23223	ribosomal RNA processing 12 homolog	0.561361	0.0452322
RSBN1L	222194	round spermatid basic protein 1 like	0.418722	0.00495295
RSC1A1	6248	regulator of solute carriers 1	-4.27398	0.0404405
RSF1	51773	remodeling and spacing factor 1	1.23381	8.00834e-05
RSRC1	51319	arginine and serine rich coiled-coil 1	0.45078	0.0045305
RSRP1	57035	arginine and serine rich protein 1	0.461112	0.0370948
RTEL1-TNFRSF6B	100533107	RTEL1-TNFRSF6B readthrough (NMD candidate)	-2.25831	0.0410173
RTL5	340526	retrotransposon Gag like 5	0.728887	0.0248558
RTL8A	26071	retrotransposon Gag like 8A	-0.476391	0.00999186
RUBCN	9711	rubicon autophagy regulator	0.585527	0.00463963
RUNDC1	146923	RUN domain containing 1	0.294528	0.0265968
RWDD1	51389	RWD domain containing 1	0.449591	0.00518885
SAC3D1	29901	SAC3 domain containing 1	0.416513	0.0441373
SACS	26278	sacsin molecular chaperone	0.597886	0.00513286
SAMD1	90378	sterile alpha motif domain containing 1	0.562973	0.0032081
SAMD12	401474	sterile alpha motif domain containing 12	-1.71575	0.0235116
SAMHD1	25939	SAM and HD domain containing deoxynucleoside triphosphate triphosphohydrolase 1	0.60217	0.0104495
SBNO1	55206	strawberry notch homolog 1	0.569876	0.00489471
SCAF11	9169	SR-related CTD associated factor 11	0.312858	0.0140024
SCAMP4	113178	secretory carrier membrane protein 4	-0.343426	0.00842547
SCAMP5	192683	secretory carrier membrane protein 5	-0.598112	0.0316895
SCAND2P	54581	SCAN domain containing 2 pseudogene	-1.05875	0.00560116
SCD	6319	stearoyl-CoA desaturase	0.802563	0.00237031
SCP2	6342	sterol carrier protein 2	-0.277517	0.0453842
SDF2L1	23753	stromal cell derived factor 2 like 1	0.470575	0.0419244
SEC23B	10483	SEC23 homolog B, coat complex II component	0.513697	0.000711667
SEC31A	22872	SEC31 homolog A, COPII coat complex component	0.323386	0.00725821
SEC61A1	29927	SEC61 translocon alpha 1 subunit	0.27252	0.0173494
SEC62	7095	SEC62 homolog, preprotein translocation factor	0.653345	0.000640494
SELE	6401	selectin E	0.976087	0.0195944
SELENOK	58515	selenoprotein K	0.527879	0.0122036
SEMA4B	10509	semaphorin 4B	0.504204	0.0218061
SEMA4D	10507	semaphorin 4D	-0.888364	0.0465275
SEMA6A	57556	semaphorin 6A	-1.06703	0.0310462
SEMA6D	80031	semaphorin 6D	-1.75894	0.00561541
SENP5	205564	SUMO specific peptidase 5	0.839427	7.46795e-05
SENP7	57337	SUMO specific peptidase 7	-0.947305	0.024966
SEPTIN11	55752	septin 11	0.349868	0.00139512
SEPTIN7P2	641977	septin 7 pseudogene 2	-0.810025	0.0283173
SERINC5	256987	serine incorporator 5	0.491006	0.026989
SERP1	27230	stress associated endoplasmic reticulum protein 1	0.4273	0.00233495
SERPINH1	871	serpin family H member 1	0.32936	0.00789932
SERTAD2	9792	SERTA domain containing 2	0.837184	0.000411118
SF3A2	8175	splicing factor 3a subunit 2	-0.35493	0.0187463
SF3B3	23450	splicing factor 3b subunit 3	0.405912	0.0225601
SF3B4	10262	splicing factor 3b subunit 4	-0.401117	0.00560943
SFT2D2	375035	SFT2 domain containing 2	-0.478902	0.00708136
SFXN1	94081	sideroflexin 1	0.469085	0.0324188
SGO2	151246	shugoshin 2	0.861895	0.0185344
SHISA9	729993	shisa family member 9	-2.07341	0.0192417
SIAH1	6477	siah E3 ubiquitin protein ligase 1	-0.34807	0.030066
SIAH2	6478	siah E3 ubiquitin protein ligase 2	0.382846	0.00379299
SIL1	64374	SIL1 nucleotide exchange factor	0.423081	0.042088
SKAP2	8935	src kinase associated phosphoprotein 2	0.286401	0.037384
SKIL	6498	SKI like proto-oncogene	0.655231	0.0344022
SLAIN2	57606	SLAIN motif family member 2	0.400772	0.00364393
SLC11A2	4891	solute carrier family 11 member 2	-0.537837	0.0246469
SLC12A8	84561	solute carrier family 12 member 8	-1.45155	0.0125952
SLC15A4	121260	solute carrier family 15 member 4	-0.415922	0.0204443
SLC16A3	9123	solute carrier family 16 member 3	0.4384	0.0136824
SLC16A7	9194	solute carrier family 16 member 7	-0.769289	0.047998
SLC1A5	6510	solute carrier family 1 member 5	0.595756	0.0167
SLC25A51	92014	solute carrier family 25 member 51	0.530619	0.00198388
SLC26A4-AS1	286002	SLC26A4 antisense RNA 1	-2.05355	0.0338873
SLC27A4	10999	solute carrier family 27 member 4	0.259202	0.0467507
SLC2A1	6513	solute carrier family 2 member 1	1.16247	0.00118959
SLC2A3	6515	solute carrier family 2 member 3	1.33493	0.00504404
SLC30A1	7779	solute carrier family 30 member 1	0.330127	0.0402715
SLC30A5	64924	solute carrier family 30 member 5	0.374618	0.014499
SLC35A5	55032	solute carrier family 35 member A5	-0.298475	0.0404176
SLC35B2	347734	solute carrier family 35 member B2	-0.261105	0.029592
SLC35E1	79939	solute carrier family 35 member E1	0.470728	0.000845035
SLC36A4	120103	solute carrier family 36 member 4	-0.720762	0.0473773
SLC37A2	219855	solute carrier family 37 member 2	-0.60682	0.03027
SLC37A3	84255	solute carrier family 37 member 3	-0.352535	0.0142494
SLC39A9	55334	solute carrier family 39 member 9	0.394277	0.00413213
SLC48A1	55652	solute carrier family 48 member 1	0.592744	0.0136705
SLC5A3	6526	solute carrier family 5 member 3	0.947224	0.00103559
SLC66A1	54896	solute carrier family 66 member 1	-0.485343	0.00273472
SLC9A7P1	121456	solute carrier family 9 member 7 pseudogene 1	0.956671	0.0259266
SLF1	84250	SMC5-SMC6 complex localization factor 1	0.749627	0.0394577
SLFN11	91607	schlafen family member 11	0.742086	0.0059906
SLX4IP	128710	SLX4 interacting protein	1.10453	0.000185214
SMAD3	4088	SMAD family member 3	-0.429231	0.023789
SMARCA4	6597	SWI/SNF related, matrix associated, actin dependent regulator of chromatin, subfamily a, member 4	0.510616	0.00504072
SMARCAL1	50485	SWI/SNF related, matrix associated, actin dependent regulator of chromatin, subfamily a like 1	0.36637	0.0242989
SMC1A	8243	structural maintenance of chromosomes 1A	0.570097	0.034447
SMC2	10592	structural maintenance of chromosomes 2	0.531376	0.0105622
SMC4	10051	structural maintenance of chromosomes 4	0.961689	0.000201712
SMG1P7	100506060	SMG1 pseudogene 7	-0.900955	0.0102522
SMG7	9887	SMG7 nonsense mediated mRNA decay factor	0.300796	0.0448018
SMIM13	221710	small integral membrane protein 13	0.3491	0.010355
SMIM19	114926	small integral membrane protein 19	-0.565602	0.0223704
SMIM30	401397	small integral membrane protein 30	-0.357446	0.00698136
SMIM4	440957	small integral membrane protein 4	-0.59692	0.0212074
SMNDC1	10285	survival motor neuron domain containing 1	-0.37171	0.0363312
SMYD3	64754	SET and MYND domain containing 3	-0.572512	0.0200504
SND1	27044	staphylococcal nuclease and tudor domain containing 1	0.48644	7.56956e-05
SNHG11	128439	small nucleolar RNA host gene 11	-0.660837	0.00218813
SNHG14	104472715	small nucleolar RNA host gene 14	-0.776851	0.00469296
SNHG20	654434	small nucleolar RNA host gene 20	-0.571424	0.0275135
SNHG30	105371743	small nucleolar RNA host gene 30	-0.899696	0.00394518
SNHG4	724102	small nucleolar RNA host gene 4	-0.634116	0.0140082
SNIP1	79753	Smad nuclear interacting protein 1	-0.367453	0.0220784
SNRNP35	11066	small nuclear ribonucleoprotein U11/U12 subunit 35	-0.319142	0.0190082
SNRPB	6628	small nuclear ribonucleoprotein polypeptides B and B1	-0.314383	0.0387184
SNTB2	6645	syntrophin beta 2	-0.311998	0.0420461
SNX18	112574	sorting nexin 18	0.327885	0.0361603
SNX4	8723	sorting nexin 4	-0.271844	0.0398045
SON	6651	SON DNA binding protein	0.639609	0.00247172
SOX4	6659	SRY-box transcription factor 4	0.909284	1.95747e-06
SP2	6668	Sp2 transcription factor	-0.425152	0.0400127
SPACA9	11092	sperm acrosome associated 9	-0.568307	0.0294619
SPAG7	9552	sperm associated antigen 7	-0.267217	0.0470998
SPG21	51324	SPG21 abhydrolase domain containing, maspardin	-0.318731	0.0431531
SPOCD1	90853	SPOC domain containing 1	-0.713424	0.0112233
SPPL3	121665	signal peptide peptidase like 3	-0.507915	0.0321678
SPRYD4	283377	SPRY domain containing 4	-0.389146	0.0302971
SPTSSA	171546	serine palmitoyltransferase small subunit A	-0.275934	0.00899927
SREBF2	6721	sterol regulatory element binding transcription factor 2	0.306071	0.023307
SREK1	140890	splicing regulatory glutamic acid and lysine rich protein 1	0.425032	0.00717681
SREK1IP1	285672	SREK1 interacting protein 1	0.608765	0.0280837
SRF	6722	serum response factor	0.261573	0.0298946
SRGAP1	57522	SLIT-ROBO Rho GTPase activating protein 1	1.15951	0.00339205
SRGAP2	23380	SLIT-ROBO Rho GTPase activating protein 2	0.379794	0.0311974
SRP68	6730	signal recognition particle 68	0.277322	0.0107994
SRP72	6731	signal recognition particle 72	0.29583	0.00888537
SRPRB	58477	SRP receptor subunit beta	0.658474	0.000379567
SRSF4	6429	serine and arginine rich splicing factor 4	0.540765	0.000305589
SRSF5	6430	serine and arginine rich splicing factor 5	-0.854659	0.00017757
SS18	6760	SS18 subunit of BAF chromatin remodeling complex	-0.3717	0.00273075
SSR1	6745	signal sequence receptor subunit 1	0.253177	0.0352269
SSR3	6747	signal sequence receptor subunit 3	0.434727	0.0152968
SSU72	29101	SSU72 homolog, RNA polymerase II CTD phosphatase	0.401534	0.00686519
ST6GALNAC4	27090	ST6 N-acetylgalactosaminide alpha-2,6-sialyltransferase 4	0.451087	0.00846189
STAM2	10254	signal transducing adaptor molecule 2	0.364881	0.0199978
STAT3	6774	signal transducer and activator of transcription 3	0.266352	0.018387
STK17B	9262	serine/threonine kinase 17b	1.09649	0.00153863
STRN4	29888	striatin 4	-0.476529	0.00117487
STT3A	3703	STT3 oligosaccharyltransferase complex catalytic subunit A	0.380399	0.0018525
STX17-AS1	441461	STX17 antisense RNA 1	-1.56659	0.0375079
STX4	6810	syntaxin 4	-0.286569	0.0117838
STXBP4	252983	syntaxin binding protein 4	1.00782	0.00653041
STYX	6815	serine/threonine/tyrosine interacting protein	0.277379	0.042291
STYXL1	51657	serine/threonine/tyrosine interacting like 1	0.677392	0.0317512
SUDS3	64426	SDS3 homolog, SIN3A corepressor complex component	0.311842	0.0132005
SUGT1	10910	SGT1 homolog, MIS12 kinetochore complex assembly cochaperone	0.351594	0.00558392
SUMF2	25870	sulfatase modifying factor 2	0.292901	0.0340452
SUN2	25777	Sad1 and UNC84 domain containing 2	-0.309773	0.0178729
SUOX	6821	sulfite oxidase	-0.401507	0.0139946
SVIL-AS1	102724316	SVIL antisense RNA 1	0.492352	0.00928862
SYMPK	8189	symplekin	0.293316	0.0142541
SYNJ1	8867	synaptojanin 1	0.371257	0.0147825
SYNPO	11346	synaptopodin	0.783092	0.00199022
SYT17	51760	synaptotagmin 17	0.814613	0.0409913
TAF13	6884	TATA-box binding protein associated factor 13	0.680712	0.024342
TAF3	83860	TATA-box binding protein associated factor 3	0.506355	0.00402103
TAF6L	10629	TATA-box binding protein associated factor 6 like	-0.582953	0.0141174
TAOK3	51347	TAO kinase 3	0.488807	0.0266135
TAP1	6890	transporter 1, ATP binding cassette subfamily B member	0.590111	0.00210355
TAPBP	6892	TAP binding protein	0.732459	0.000235489
TASOR	23272	transcription activation suppressor	0.512387	0.00155036
TBC1D1	23216	TBC1 domain family member 1	0.543478	0.000308035
TBC1D15	64786	TBC1 domain family member 15	-0.388573	0.0201105
TBC1D3L	101060376	TBC1 domain family member 3L	-1.15044	0.0382981
TBC1D8B	54885	TBC1 domain family member 8B	-1.13761	0.0430136
TBK1	29110	TANK binding kinase 1	-0.374785	0.0170585
TBL1XR1	79718	transducin beta like 1 X-linked receptor 1	0.450277	0.0131075
TCEAL1	9338	transcription elongation factor A like 1	-0.459281	0.0238563
TCF20	6942	transcription factor 20	0.542594	0.00422323
TCP11L2	255394	t-complex 11 like 2	0.651848	0.0316402
TEAD4	7004	TEA domain transcription factor 4	0.442975	0.00236763
TECPR2	9895	tectonin beta-propeller repeat containing 2	0.653511	0.028118
TEN1	100134934	TEN1 subunit of CST complex	-0.404447	0.0180395
TF	7018	transferrin	-1.23612	0.0337017
TFRC	7037	transferrin receptor	-0.375169	0.0291577
TGFBRAP1	9392	transforming growth factor beta receptor associated protein 1	-0.406214	0.042783
THAP6	152815	THAP domain containing 6	-0.615409	0.0245224
THAP7-AS1	439931	THAP7 antisense RNA 1	-0.994012	0.0453362
THAP9	79725	THAP domain containing 9	-0.631643	0.0462577
THEM4	117145	thioesterase superfamily member 4	-0.522386	0.00866737
THOC2	57187	THO complex 2	0.535352	0.0140899
TIAM2	26230	TIAM Rac1 associated GEF 2	-0.579418	0.035851
TIMM23B	100652748	translocase of inner mitochondrial membrane 23 homolog B	-1.08238	0.000352178
TIMM8B	26521	translocase of inner mitochondrial membrane 8 homolog B	-0.380535	0.0322494
TKT	7086	transketolase	0.463993	0.00640287
TLE3	7090	TLE family member 3, transcriptional corepressor	0.895881	0.000209642
TLK1	9874	tousled like kinase 1	0.502231	0.00454649
TM4SF18	116441	transmembrane 4 L six family member 18	-0.393849	0.024911
TM7SF3	51768	transmembrane 7 superfamily member 3	0.363103	0.0202092
TMC7	79905	transmembrane channel like 7	-0.367613	0.0309082
TMED7-TICAM2	100302736	TMED7-TICAM2 readthrough	1.10642	0.018053
TMEFF1	8577	transmembrane protein with EGF like and two follistatin like domains 1	-0.988877	0.0219218
TMEM120B	144404	transmembrane protein 120B	1.37013	0.000270298
TMEM158	25907	transmembrane protein 158 (gene/pseudogene)	2.52505	0.00169851
TMEM165	55858	transmembrane protein 165	-0.41008	0.00211602
TMEM167B	56900	transmembrane protein 167B	-0.36464	0.000700938
TMEM170A	124491	transmembrane protein 170A	0.472423	0.0414089
TMEM182	130827	transmembrane protein 182	-1.9923	0.02298
TMEM19	55266	transmembrane protein 19	-0.441824	0.0257406
TMEM200A	114801	transmembrane protein 200A	-2.47797	0.018945
TMEM212	389177	transmembrane protein 212	-1.91488	0.01359
TMEM222	84065	transmembrane protein 222	-0.296	0.0391168
TMEM231	79583	transmembrane protein 231	-0.41247	0.0214963
TMEM273	170371	transmembrane protein 273	-1.21299	0.037157
TMEM30A	55754	transmembrane protein 30A	-0.260488	0.0203581
TMEM33	55161	transmembrane protein 33	0.251611	0.0178516
TMEM60	85025	transmembrane protein 60	-0.640366	0.0207054
TMEM63A	9725	transmembrane protein 63A	0.440936	0.0438906
TMEM69	51249	transmembrane protein 69	-0.558937	0.00101862
TMEM87A	25963	transmembrane protein 87A	-0.293173	0.0142236
TMEM91	641649	transmembrane protein 91	-0.582596	0.0346881
TMF1	7110	TATA element modulatory factor 1	0.503154	0.00271293
TMSB15B	286527	thymosin beta 15B	-0.701674	0.0102716
TNFRSF25	8718	TNF receptor superfamily member 25	-0.976809	0.00524704
TNRC6A	27327	trinucleotide repeat containing adaptor 6A	0.652975	0.00537632
TOB1	10140	transducer of ERBB2, 1	0.3592	0.037467
TOB2	10766	transducer of ERBB2, 2	0.409065	0.0216484
TOP1	7150	DNA topoisomerase I	0.462688	5.28635e-05
TOP2A	7153	DNA topoisomerase II alpha	1.22695	0.00159743
TOP3B	8940	DNA topoisomerase III beta	-0.657235	0.0149422
TOR1AIP2	163590	torsin 1A interacting protein 2	0.882724	0.000253631
TP73-AS1	57212	TP73 antisense RNA 1	-0.424966	0.0150482
TPI1	7167	triosephosphate isomerase 1	0.350147	0.0209076
TPP2	7174	tripeptidyl peptidase 2	0.456801	0.0213157
TPX2	22974	TPX2 microtubule nucleation factor	0.597243	0.0384467
TRIM3	10612	tripartite motif containing 3	-0.575707	0.00238968
TRIM33	51592	tripartite motif containing 33	0.519476	0.00949942
TRIM38	10475	tripartite motif containing 38	0.328364	0.0376115
TRIM44	54765	tripartite motif containing 44	0.333209	0.0255337
TRIM56	81844	tripartite motif containing 56	0.630434	0.00868893
TRIM69	140691	tripartite motif containing 69	0.558108	0.00838971
TRIOBP	11078	TRIO and F-actin binding protein	-0.279375	0.0380422
TRIP12	9320	thyroid hormone receptor interactor 12	0.52196	0.00356617
TRIP6	7205	thyroid hormone receptor interactor 6	-0.286727	0.0114108
TRMT1L	81627	tRNA methyltransferase 1 like	0.598009	0.00310109
TRMT2B	79979	tRNA methyltransferase 2 homolog B	-0.443147	0.047544
TSBP1-AS1	101929163	TSBP1 and BTNL2 antisense RNA 1	-1.94018	0.0176203
TSC22D2	9819	TSC22 domain family member 2	0.491135	0.015794
TSPY26P	128854	testis specific protein Y-linked 26, pseudogene	0.751882	0.0205535
TSPYL1	7259	TSPY like 1	0.735269	4.02167e-05
TSPYL4	23270	TSPY like 4	-0.470073	0.00544787
TTC12	54970	tetratricopeptide repeat domain 12	0.957993	0.0287553
TTC21B	79809	tetratricopeptide repeat domain 21B	0.560326	0.0070932
TTC7B	145567	tetratricopeptide repeat domain 7B	0.32404	0.0322101
TTF1	7270	transcription termination factor 1	0.508691	0.0210915
TUBGCP4	27229	tubulin gamma complex associated protein 4	0.581223	0.0232286
TUBGCP5	114791	tubulin gamma complex associated protein 5	-0.42256	0.0355997
TXLNA	200081	taxilin alpha	0.513705	0.00251991
TYMP	1890	thymidine phosphorylase	0.924692	0.00903226
TYRO3	7301	TYRO3 protein tyrosine kinase	0.442637	0.0182003
U2AF1L5	102724594	U2 small nuclear RNA auxiliary factor 1 like 5	-0.38733	0.0318893
UBA3	9039	ubiquitin like modifier activating enzyme 3	-0.319851	0.00924797
UBA6	55236	ubiquitin like modifier activating enzyme 6	0.602581	0.00762658
UBAC1	10422	UBA domain containing 1	-0.267661	0.0446572
UBASH3B	84959	ubiquitin associated and SH3 domain containing B	0.602223	0.00834082
UBC	7316	ubiquitin C	0.315426	0.0497094
UBE2S	27338	ubiquitin conjugating enzyme E2 S	0.590802	0.0030587
UBE3A	7337	ubiquitin protein ligase E3A	0.372047	0.030709
UBE4A	9354	ubiquitination factor E4A	0.442775	0.00619058
UBFD1	56061	ubiquitin family domain containing 1	0.587373	8.79177e-06
UBLCP1	134510	ubiquitin like domain containing CTD phosphatase 1	-0.325598	0.00676221
UBN2	254048	ubinuclein 2	0.401078	0.0170528
UBXN7	26043	UBX domain protein 7	0.465161	0.00691006
UFSP2	55325	UFM1 specific peptidase 2	0.541309	0.00600651
UGDH	7358	UDP-glucose 6-dehydrogenase	0.709192	0.00177966
UGDH-AS1	100885776	UGDH antisense RNA 1	-2.17698	0.00972699
UHRF2	115426	ubiquitin like with PHD and ring finger domains 2	0.300035	0.0227214
UNK	85451	unk zinc finger	-0.755009	0.000454877
UPF2	26019	UPF2 regulator of nonsense mediated mRNA decay	0.359232	0.049544
UPF3B	65109	UPF3B regulator of nonsense mediated mRNA decay	0.480688	0.0356729
UPP1	7378	uridine phosphorylase 1	0.723988	0.00218942
UPRT	139596	uracil phosphoribosyltransferase homolog	-0.414262	0.00924467
USO1	8615	USO1 vesicle transport factor	0.407963	0.00158613
USP12	219333	ubiquitin specific peptidase 12	-0.367805	0.0202096
USP4	7375	ubiquitin specific peptidase 4	0.327336	0.00686229
USP7	7874	ubiquitin specific peptidase 7	0.283947	0.022606
UTRN	7402	utrophin	0.436656	0.0123429
UVSSA	57654	UV stimulated scaffold protein A	-0.686751	0.0274827
VCPIP1	80124	valosin containing protein interacting protein 1	0.367638	0.048177
VEGFA	7422	vascular endothelial growth factor A	1.40537	0.00273069
VIRMA	25962	vir like m6A methyltransferase associated	0.624253	0.0179964
VPS25	84313	vacuolar protein sorting 25 homolog	-0.299231	0.0489301
VPS29	51699	VPS29 retromer complex component	-0.31465	0.0355887
VPS50	55610	VPS50 subunit of EARP/GARPII complex	0.305532	0.0208993
VPS72	6944	vacuolar protein sorting 72 homolog	-0.327631	0.0340229
VSIG10L	147645	V-set and immunoglobulin domain containing 10 like	-1.02382	0.0138713
VTI1B	10490	vesicle transport through interaction with t-SNAREs 1B	0.366872	0.0168879
VWCE	220001	von Willebrand factor C and EGF domains	-0.788885	0.00741426
WDR37	22884	WD repeat domain 37	-0.304074	0.036291
WDR45B	56270	WD repeat domain 45B	-0.255534	0.0462257
WDR55	54853	WD repeat domain 55	0.274773	0.0404369
WDR91	29062	WD repeat domain 91	0.723632	0.0396621
WHAMMP2	440253	WAS protein homolog associated with actin, golgi membranes and microtubules pseudogene 2	-0.776987	0.0285303
WIPF2	147179	WAS/WASL interacting protein family member 2	0.481607	5.2686e-05
WTIP	126374	WT1 interacting protein	0.729831	0.00320115
XBP1	7494	X-box binding protein 1	0.591193	0.0159205
XPNPEP1	7511	X-prolyl aminopeptidase 1	-0.46107	0.0037101
XRCC3	7517	X-ray repair cross complementing 3	-1.05646	0.0223109
XRN2	22803	5'-3' exoribonuclease 2	-0.33131	0.0498069
YAF2	10138	YY1 associated factor 2	0.467015	0.0289344
YBX3	8531	Y-box binding protein 3	0.349578	0.0416412
YEATS2	55689	YEATS domain containing 2	0.359718	0.00717156
YIF1A	10897	Yip1 interacting factor homolog A, membrane trafficking protein	0.306183	0.0214077
YIPF2	78992	Yip1 domain family member 2	0.426693	0.00161165
YWHAB	7529	tyrosine 3-monooxygenase/tryptophan 5-monooxygenase activation protein beta	0.253436	0.0242456
YWHAE	7531	tyrosine 3-monooxygenase/tryptophan 5-monooxygenase activation protein epsilon	0.447792	0.000295834
ZBED4	9889	zinc finger BED-type containing 4	0.332589	0.0124857
ZBTB20	26137	zinc finger and BTB domain containing 20	1.56893	0.0042548
ZBTB22	9278	zinc finger and BTB domain containing 22	-0.401383	0.0240923
ZBTB3	79842	zinc finger and BTB domain containing 3	0.628084	0.0406646
ZBTB38	253461	zinc finger and BTB domain containing 38	0.586214	0.00147664
ZBTB49	166793	zinc finger and BTB domain containing 49	0.835286	0.00621103
ZBTB7A	51341	zinc finger and BTB domain containing 7A	0.416673	0.0033175
ZBTB8A	653121	zinc finger and BTB domain containing 8A	0.496423	0.0219373
ZC3H12C	85463	zinc finger CCCH-type containing 12C	-0.522352	0.00696141
ZC3H13	23091	zinc finger CCCH-type containing 13	0.797617	8.0103e-05
ZC3H15	55854	zinc finger CCCH-type containing 15	0.387558	0.00218613
ZC3H6	376940	zinc finger CCCH-type containing 6	1.35368	0.00128253
ZC3HAV1	56829	zinc finger CCCH-type containing, antiviral 1	0.361721	0.0118508
ZCCHC2	54877	zinc finger CCHC-type containing 2	0.488309	0.0241583
ZDHHC20	253832	zinc finger DHHC-type containing 20	0.276325	0.0372509
ZDHHC7	55625	zinc finger DHHC-type containing 7	-0.361535	0.0121577
ZFAND5	7763	zinc finger AN1-type containing 5	-0.302443	0.00844997
ZFHX2	85446	zinc finger homeobox 2	2.4861	0.0083687
ZFP14	57677	ZFP14 zinc finger protein	-0.715238	0.0274174
ZFR	51663	zinc finger RNA binding protein	0.394175	0.0452742
ZKSCAN1	7586	zinc finger with KRAB and SCAN domains 1	0.365521	0.0331342
ZKSCAN5	23660	zinc finger with KRAB and SCAN domains 5	0.470128	0.00725377
ZMYM4	9202	zinc finger MYM-type containing 4	0.591637	0.00214027
ZMYM6	9204	zinc finger MYM-type containing 6	-0.301935	0.0273194
ZMYND8	23613	zinc finger MYND-type containing 8	0.440519	0.00842805
ZNF106	64397	zinc finger protein 106	0.404603	0.0250562
ZNF117	51351	zinc finger protein 117	-0.783177	0.0379423
ZNF121	7675	zinc finger protein 121	0.744646	0.00953233
ZNF131	7690	zinc finger protein 131	0.30309	0.0425103
ZNF138	7697	zinc finger protein 138	-0.743596	0.0406575
ZNF212	7988	zinc finger protein 212	-0.81317	0.0137906
ZNF219	51222	zinc finger protein 219	-0.646499	0.0181905
ZNF263	10127	zinc finger protein 263	-0.528268	0.0176362
ZNF268	10795	zinc finger protein 268	0.47127	0.00326868
ZNF280C	55609	zinc finger protein 280C	-0.628655	0.00982223
ZNF285	26974	zinc finger protein 285	1.08042	0.0199678
ZNF292	23036	zinc finger protein 292	0.67401	0.000218439
ZNF337	26152	zinc finger protein 337	0.362314	0.039038
ZNF33A	7581	zinc finger protein 33A	0.554299	0.0139466
ZNF345	25850	zinc finger protein 345	1.02183	0.0435602
ZNF384	171017	zinc finger protein 384	-0.490477	0.0440949
ZNF417	147687	zinc finger protein 417	1.08924	0.028816
ZNF420	147923	zinc finger protein 420	0.598336	0.0386496
ZNF438	220929	zinc finger protein 438	0.437158	0.0379376
ZNF449	203523	zinc finger protein 449	0.760814	0.00570688
ZNF460	10794	zinc finger protein 460	-0.894953	0.0314244
ZNF473	25888	zinc finger protein 473	0.813303	0.000900267
ZNF480	147657	zinc finger protein 480	-0.676605	0.00973283
ZNF483	158399	zinc finger protein 483	-1.28114	0.0102143
ZNF487	642819	zinc finger protein 487	-0.756017	0.0362713
ZNF490	57474	zinc finger protein 490	0.882716	0.00222235
ZNF514	84874	zinc finger protein 514	-0.67441	0.020942
ZNF519	162655	zinc finger protein 519	-1.53485	0.0357295
ZNF625	90589	zinc finger protein 625	1.87884	0.00831429
ZNF654	55279	zinc finger protein 654	0.705574	0.00120116
ZNF710	374655	zinc finger protein 710	-0.617741	0.00462795
ZNF75D	7626	zinc finger protein 75D	-0.697809	0.00528892
ZNF770	54989	zinc finger protein 770	0.429262	0.00838202
ZNF773	374928	zinc finger protein 773	-0.689026	0.0268278
ZNF776	284309	zinc finger protein 776	-0.395299	0.0189298
ZNF778	197320	zinc finger protein 778	-1.02474	0.010665
ZNF790	388536	zinc finger protein 790	-0.836214	0.00461157
ZNF8	7554	zinc finger protein 8	-0.666107	0.015648
ZNF839	55778	zinc finger protein 839	-0.533971	0.0292288
ZNF862	643641	zinc finger protein 862	-0.684551	0.00767647
ZNHIT3	9326	zinc finger HIT-type containing 3	-0.423003	0.0134589
ZPR1	8882	ZPR1 zinc finger	0.364274	0.0247485
ZSCAN9	7746	zinc finger and SCAN domain containing 9	-0.555064	0.0110663
ZXDB	158586	zinc finger X-linked duplicated B	0.322195	0.0361875

## Sheet: SMCs - Hypoxia vs Normoxia
SYMBOL	ENTREZID	GENENAME	logFC	PValue
A1BG	1	alpha-1-B glycoprotein	-0.713326	0.0216767
AAMDC	28971	adipogenesis associated Mth938 domain containing	-0.523682	0.0467959
ABHD10	55347	abhydrolase domain containing 10	-0.505223	0.00962444
ABHD18	80167	abhydrolase domain containing 18	0.564219	0.0491065
ABRACL	58527	ABRA C-terminal like	-0.384364	0.0430414
ACAA1	30	acetyl-CoA acyltransferase 1	-0.482844	0.0202741
ACAT2	39	acetyl-CoA acetyltransferase 2	-0.800168	0.0336531
ACOT8	10005	acyl-CoA thioesterase 8	-0.944552	0.00428276
ACP2	53	acid phosphatase 2, lysosomal	-0.442694	0.0314519
ACP5	54	acid phosphatase 5, tartrate resistant	-1.41693	0.00900902
ACTR6	64431	actin related protein 6	0.532002	0.0455403
ADAMTS6	11174	ADAM metallopeptidase with thrombospondin type 1 motif 6	0.731117	0.0032233
ADGRB2	576	adhesion G protein-coupled receptor B2	-0.966555	0.0128887
ADGRL1	22859	adhesion G protein-coupled receptor L1	1.42639	0.0136361
ADNP	23394	activity dependent neuroprotector homeobox	0.333764	0.0463595
ADPRH	141	ADP-ribosylarginine hydrolase	0.635542	0.0333759
ADSL	158	adenylosuccinate lyase	-0.480709	0.0127233
AFAP1L1	134265	actin filament associated protein 1 like 1	-0.872877	0.0486076
AFF1	4299	AF4/FMR2 family member 1	0.732759	0.00319931
AFMID	125061	arylformamidase	0.587525	0.0130702
AGPAT5	55326	1-acylglycerol-3-phosphate O-acyltransferase 5	0.754225	0.00541493
AK4	205	adenylate kinase 4	1.14384	0.0102418
AKAP10	11216	A-kinase anchoring protein 10	0.479173	0.0139973
AKAP7	9465	A-kinase anchoring protein 7	-1.06221	0.0141172
AKR1B1	231	aldo-keto reductase family 1 member B	-0.503447	0.0032566
AKR1C2	1646	aldo-keto reductase family 1 member C2	-0.565432	0.00970516
ALDH16A1	126133	aldehyde dehydrogenase 16 family member A1	-0.653239	0.00832167
ALDH1L2	160428	aldehyde dehydrogenase 1 family member L2	0.59279	0.0397467
ALDOA	226	aldolase, fructose-bisphosphate A	0.45709	0.0304088
ALDOC	230	aldolase, fructose-bisphosphate C	0.792195	0.0463351
ALG11	440138	ALG11 alpha-1,2-mannosyltransferase	0.476327	0.043503
ALG13	79868	ALG13 UDP-N-acetylglucosaminyltransferase subunit	-0.651662	0.00852701
ALG5	29880	ALG5 dolichyl-phosphate beta-glucosyltransferase	-0.442968	0.0176632
AMDHD2	51005	amidohydrolase domain containing 2	-1.06561	0.00062922
AMPH	273	amphiphysin	-0.971931	0.0421937
ANAPC11	51529	anaphase promoting complex subunit 11	-0.556633	0.0283068
ANAPC13	25847	anaphase promoting complex subunit 13	-0.423533	0.0288242
ANAPC16	119504	anaphase promoting complex subunit 16	-0.396443	0.0225131
ANKAR	150709	ankyrin and armadillo repeat containing	1.67573	0.0262255
ANKLE2	23141	ankyrin repeat and LEM domain containing 2	0.471364	0.0181028
ANKRD10	55608	ankyrin repeat domain 10	0.687188	0.0450851
ANKRD12	23253	ankyrin repeat domain 12	1.02006	0.0393055
ANKRD27	84079	ankyrin repeat domain 27	0.550292	0.0200264
ANKRD29	147463	ankyrin repeat domain 29	-1.18898	0.00793878
ANKRD36B	57730	ankyrin repeat domain 36B	1.54893	0.0382942
ANKRD36C	400986	ankyrin repeat domain 36C	1.14266	0.00887151
ANKRD39	51239	ankyrin repeat domain 39	-0.571589	0.0332658
ANKRD52	283373	ankyrin repeat domain 52	0.435874	0.0296338
ANTXR2	118429	ANTXR cell adhesion molecule 2	0.467688	0.0105368
AP2S1	1175	adaptor related protein complex 2 subunit sigma 1	-0.581937	0.00815191
APBB1	322	amyloid beta precursor protein binding family B member 1	-0.399582	0.0326184
APEH	327	acylaminoacyl-peptide hydrolase	-0.468667	0.0401869
ARF3	377	ADP ribosylation factor 3	-0.382255	0.029172
ARF5	381	ADP ribosylation factor 5	-0.40536	0.0332389
ARFGEF2	10564	ADP ribosylation factor guanine nucleotide exchange factor 2	0.496843	0.0479562
ARHGAP1	392	Rho GTPase activating protein 1	-0.341262	0.0472965
ARHGAP19	84986	Rho GTPase activating protein 19	0.835568	0.0017157
ARHGEF18	23370	Rho/Rac guanine nucleotide exchange factor 18	0.445121	0.0444613
ARID1A	8289	AT-rich interaction domain 1A	0.356846	0.0473706
ARL16	339231	ADP ribosylation factor like GTPase 16	-0.476995	0.0282618
ARL4D	379	ADP ribosylation factor like GTPase 4D	-0.523926	0.0138299
ARL6IP6	151188	ADP ribosylation factor like GTPase 6 interacting protein 6	0.48163	0.0496874
ARMCX5-GPRASP2	100528062	ARMCX5-GPRASP2 readthrough	1.3069	0.00304228
ARNT	405	aryl hydrocarbon receptor nuclear translocator	0.614634	0.0407705
ARRB1	408	arrestin beta 1	-0.624075	0.0142961
ASPH	444	aspartate beta-hydroxylase	0.357269	0.0219858
ATAD3A	55210	ATPase family AAA domain containing 3A	-0.476224	0.0276317
ATF7IP	55729	activating transcription factor 7 interacting protein	0.580117	0.00863846
ATG14	22863	autophagy related 14	0.591761	0.0295216
ATOX1	475	antioxidant 1 copper chaperone	-0.663862	0.0173773
ATP5F1C	509	ATP synthase F1 subunit gamma	-0.474753	0.0351784
ATP5F1D	513	ATP synthase F1 subunit delta	-0.606452	0.0436815
ATP5F1E	514	ATP synthase F1 subunit epsilon	-0.572101	0.0156945
ATP5MC1	516	ATP synthase membrane subunit c locus 1	-0.75673	0.0160854
ATP5MC2	517	ATP synthase membrane subunit c locus 2	-0.476585	0.0240596
ATP5MC3	518	ATP synthase membrane subunit c locus 3	-0.515346	0.0110737
ATP5MD	84833	ATP synthase membrane subunit DAPIT	-0.655581	0.0103614
ATP5MG	10632	ATP synthase membrane subunit g	-0.710791	0.0274386
ATP5PF	522	ATP synthase peripheral stalk subunit F6	-0.437486	0.0381424
ATP6V0E1	8992	ATPase H+ transporting V0 subunit e1	-0.574238	0.0134894
ATP6V0E2	155066	ATPase H+ transporting V0 subunit e2	-0.690759	0.0232627
ATP6V1F	9296	ATPase H+ transporting V1 subunit F	-0.485978	0.00735715
AURKAIP1	54998	aurora kinase A interacting protein 1	-0.509429	0.0430733
AXIN2	8313	axin 2	-1.35815	0.00591725
B4GAT1	11041	beta-1,4-glucuronyltransferase 1	-0.442907	0.043606
BAALC	79870	BAALC binder of MAP3K1 and KLF4	-0.62111	0.0116657
BABAM1	29086	BRISC and BRCA1 A complex member 1	-0.417412	0.0283675
BABAM2	9577	BRISC and BRCA1 A complex member 2	-0.398702	0.0481991
BAZ1B	9031	bromodomain adjacent to zinc finger domain 1B	0.433083	0.0217098
BBIP1	92482	BBSome interacting protein 1	-0.569789	0.0304129
BCL9	607	BCL9 transcription coactivator	0.693146	0.0439733
BEX1	55859	brain expressed X-linked 1	-1.08507	0.000345553
BEX3	27018	brain expressed X-linked 3	-0.480042	0.0221595
BHLHB9	80823	basic helix-loop-helix family member b9	2.02498	0.0341015
BICRA	29998	BRD4 interacting chromatin remodeling complex associated protein	0.641662	0.0427503
BLOC1S5	63915	biogenesis of lysosomal organelles complex 1 subunit 5	0.460176	0.0463496
BNC1	646	basonuclin 1	0.881413	0.0138164
BNIP3	664	BCL2 interacting protein 3	0.751107	0.00169133
BNIP3L	665	BCL2 interacting protein 3 like	0.483733	0.0293234
BOD1L1	259282	biorientation of chromosomes in cell division 1 like 1	0.867257	0.0146403
BOLA2	552900	bolA family member 2	-0.609811	0.0169826
BOLA2-SMG1P6	107282092	BOLA2-SMG1P6 readthrough	-0.454939	0.0384217
BOLA3	388962	bolA family member 3	-0.549311	0.0377227
BORCS8	729991	BLOC-1 related complex subunit 8	-0.634481	0.0454902
BRCC3	79184	BRCA1/BRCA2-containing complex subunit 3	0.554451	0.0302627
BRPF1	7862	bromodomain and PHD finger containing 1	0.610205	0.0228236
BRWD3	254065	bromodomain and WD repeat domain containing 3	0.722122	0.0239913
BTN2A1	11120	butyrophilin subfamily 2 member A1	0.745328	0.00294164
BTN3A1	11119	butyrophilin subfamily 3 member A1	0.50899	0.0456202
BTRC	8945	beta-transducin repeat containing E3 ubiquitin protein ligase	0.582199	0.0183803
BUB1B	701	BUB1 mitotic checkpoint serine/threonine kinase B	-1.77047	0.00572912
C11orf95	65998	chromosome 11 open reading frame 95	0.767643	0.0327095
C11orf98	102288414	chromosome 11 open reading frame 98	-0.654857	0.0260184
C16orf70	80262	chromosome 16 open reading frame 70	0.495148	0.0475519
C16orf87	388272	chromosome 16 open reading frame 87	-0.670598	0.0408375
C18orf32	497661	chromosome 18 open reading frame 32	-0.358801	0.0482302
C19orf48	84798	chromosome 19 open reading frame 48	-0.418344	0.0201402
C1orf54	79630	chromosome 1 open reading frame 54	-0.736144	0.0125018
C1S	716	complement C1s	0.379545	0.0498432
C20orf194	25943	chromosome 20 open reading frame 194	0.612706	0.0373034
C20orf27	54976	chromosome 20 open reading frame 27	-0.684651	0.0126185
C20orf96	140680	chromosome 20 open reading frame 96	-0.89279	0.00432022
C2CD3	26005	C2 domain containing 3 centriole elongation regulator	0.560101	0.0154883
C3orf18	51161	chromosome 3 open reading frame 18	0.481219	0.0184487
C3orf80	401097	chromosome 3 open reading frame 80	-0.96146	0.0483664
C6orf226	441150	chromosome 6 open reading frame 226	-0.729427	0.0265583
C7orf50	84310	chromosome 7 open reading frame 50	-0.507489	0.0325693
C9orf16	79095	chromosome 9 open reading frame 16	-0.593119	0.0116403
CABLES1	91768	Cdk5 and Abl enzyme substrate 1	-0.824815	0.016528
CACNG7	59284	calcium voltage-gated channel auxiliary subunit gamma 7	-0.529381	0.0439093
CAMK2N1	55450	calcium/calmodulin dependent protein kinase II inhibitor 1	-0.435898	0.00930092
CAMKMT	79823	calmodulin-lysine N-methyltransferase	-0.963083	0.0470377
CAMTA1	23261	calmodulin binding transcription activator 1	-0.327605	0.0475979
CANX	821	calnexin	0.421486	0.0098907
CAPN5	726	calpain 5	-0.547565	0.0159525
CAPZA1	829	capping actin protein of muscle Z-line subunit alpha 1	0.464502	0.025278
CARD11	84433	caspase recruitment domain family member 11	1.25502	0.0414103
CASC3	22794	CASC3 exon junction complex subunit	0.345691	0.0396149
CAVIN3	112464	caveolae associated protein 3	-0.623248	0.0102461
CBARP	255057	CACN subunit beta associated regulatory protein	0.687989	0.0232774
CBFA2T2	9139	CBFA2/RUNX1 partner transcriptional co-repressor 2	0.735637	0.00863473
CBL	867	Cbl proto-oncogene	0.626539	0.0364962
CC2D2A	57545	coiled-coil and C2 domain containing 2A	-0.926429	0.00828749
CCDC112	153733	coiled-coil domain containing 112	0.728547	0.0484971
CCDC18-AS1	100131564	CCDC18 antisense RNA 1	1.56044	0.00217271
CCDC32	90416	coiled-coil domain containing 32	-0.69537	0.033821
CCDC71L	168455	coiled-coil domain containing 71 like	-0.493344	0.0283972
CCDC82	79780	coiled-coil domain containing 82	0.494204	0.0483772
CCDC91	55297	coiled-coil domain containing 91	0.629152	0.0215383
CCL7	6354	C-C motif chemokine ligand 7	-1.82468	0.0228234
CCNH	902	cyclin H	-0.393044	0.0461632
CCNT1	904	cyclin T1	0.742928	0.0189558
CCNT2	905	cyclin T2	0.834145	0.0152269
CCNY	219771	cyclin Y	-0.46461	0.0122936
CD58	965	CD58 molecule	-0.432439	0.0442391
CDC20	991	cell division cycle 20	-1.3685	0.00568916
CDC42BPB	9578	CDC42 binding protein kinase beta	0.364471	0.0416993
CDCP1	64866	CUB domain containing protein 1	0.769908	0.00486851
CDK13	8621	cyclin dependent kinase 13	0.435562	0.0477115
CDK4	1019	cyclin dependent kinase 4	-0.561694	0.0139737
CDK5	1020	cyclin dependent kinase 5	-0.644705	0.0077044
CDKN2A	1029	cyclin dependent kinase inhibitor 2A	-0.511027	0.00457188
CDKN2B	1030	cyclin dependent kinase inhibitor 2B	-0.791906	0.0300014
CEACAMP10	1098	CEA cell adhesion molecule pseudogene 10	1.9762	0.0455652
CENPBD1P1	65996	CENPB DNA-binding domains containing 1 pseudogene 1	-0.57214	0.0365189
CENPH	64946	centromere protein H	-0.739444	0.0227875
CENPM	79019	centromere protein M	-1.61364	0.0210901
CENPN	55839	centromere protein N	-0.780435	0.0167066
CENPW	387103	centromere protein W	-1.22607	0.0053275
CEP135	9662	centrosomal protein 135	0.636595	0.0489066
CEP170	9859	centrosomal protein 170	0.733136	0.00314356
CEP192	55125	centrosomal protein 192	-0.691522	0.0298555
CEP57L1	285753	centrosomal protein 57 like 1	0.577859	0.0484356
CEP70	80321	centrosomal protein 70	-0.761305	0.0409405
CEPT1	10390	choline/ethanolamine phosphotransferase 1	0.783182	0.000886852
CETN2	1069	centrin 2	-0.458901	0.0131054
CFAP410	755	cilia and flagella associated protein 410	-1.02727	0.00311997
CGAS	115004	cyclic GMP-AMP synthase	0.763633	0.0179584
CHCHD5	84269	coiled-coil-helix-coiled-coil-helix domain containing 5	-0.588765	0.0160856
CHCHD7	79145	coiled-coil-helix-coiled-coil-helix domain containing 7	-0.651305	0.0282913
CHD1	1105	chromodomain helicase DNA binding protein 1	0.656313	0.0215059
CHM	1121	CHM Rab escort protein	0.449277	0.0443762
CHORDC1	26973	cysteine and histidine rich domain containing 1	0.661844	0.0347197
CHPF2	54480	chondroitin polymerizing factor 2	-0.330886	0.0451738
CHROMR	101927027	cholesterol induced regulator of metabolism RNA	-0.724649	0.0391654
CHST7	56548	carbohydrate sulfotransferase 7	-0.460505	0.0302415
CHURC1	91612	churchill domain containing 1	-0.877481	0.00573128
CIB1	10519	calcium and integrin binding 1	-0.606005	0.0188744
CIRBP	1153	cold inducible RNA binding protein	-0.682455	5.36395e-05
CISD1	55847	CDGSH iron sulfur domain 1	-0.620259	0.0280628
CISD3	284106	CDGSH iron sulfur domain 3	-0.64463	0.0269456
CKAP5	9793	cytoskeleton associated protein 5	0.500523	0.0439017
CKLF	51192	chemokine like factor	-0.782499	0.0129922
CKS1B	1163	CDC28 protein kinase regulatory subunit 1B	-0.943547	0.0149353
CLASP1	23332	cytoplasmic linker associated protein 1	0.59993	0.0283146
CLDND1	56650	claudin domain containing 1	0.626244	0.00797513
CLN3	1201	CLN3 lysosomal/endosomal transmembrane protein, battenin	-0.52464	0.0136587
CLOCK	9575	clock circadian regulator	0.68469	0.0394592
CLPB	81570	ClpB homolog, mitochondrial AAA ATPase chaperonin	0.411956	0.0452638
CMC2	56942	C-X9-C motif containing 2	-0.505671	0.0412141
CMSS1	84319	cms1 ribosomal small subunit homolog	-0.959428	0.0106437
CNOT4	4850	CCR4-NOT transcription complex subunit 4	0.598486	0.0118261
CNST	163882	consortin, connexin sorting protein	0.661371	0.0370098
COA1	55744	cytochrome c oxidase assembly factor 1 homolog	-0.567963	0.0117536
COA3	28958	cytochrome c oxidase assembly factor 3	-0.724316	0.0425053
COBLL1	22837	cordon-bleu WH2 repeat protein like 1	-0.899383	0.0351481
COLGALT2	23127	collagen beta(1-O)galactosyltransferase 2	-1.1329	0.0415864
COMMD4	54939	COMM domain containing 4	-0.87957	0.00228697
COPRS	55352	coordinator of PRMT5 and differentiation stimulator	-0.487169	0.00735783
COPZ2	51226	coatomer protein complex subunit zeta 2	-0.575425	0.0312251
COQ4	51117	coenzyme Q4	-0.676475	0.00284305
COX14	84987	cytochrome c oxidase assembly factor COX14	-0.797867	0.00470983
COX17	10063	cytochrome c oxidase copper chaperone COX17	-0.502986	0.0293976
COX5A	9377	cytochrome c oxidase subunit 5A	-0.436465	0.0187072
COX7B	1349	cytochrome c oxidase subunit 7B	-0.705248	0.0304686
COX8A	1351	cytochrome c oxidase subunit 8A	-0.577823	0.0166754
CRACR2A	84766	calcium release activated channel regulator 2A	0.629778	0.0486824
CRAMP1	57585	cramped chromatin regulator homolog 1	1.122	0.00861041
CRCP	27297	CGRP receptor component	0.514585	0.0490971
CREBZF	58487	CREB/ATF bZIP transcription factor	0.758417	0.0217202
CRLF3	51379	cytokine receptor like factor 3	0.776143	0.015243
CRTC1	23373	CREB regulated transcription coactivator 1	-0.43972	0.0496651
CSF3	1440	colony stimulating factor 3	-0.77831	0.0293991
CSNK1G1	53944	casein kinase 1 gamma 1	0.538716	0.0464985
CSNK1G3	1456	casein kinase 1 gamma 3	0.505374	0.0466756
CTNNB1	1499	catenin beta 1	0.381867	0.0476324
CTNNBIP1	56998	catenin beta interacting protein 1	-0.576536	0.0488555
CTPS2	56474	CTP synthase 2	-0.668572	0.0366106
CTTNBP2NL	55917	CTTNBP2 N-terminal like	0.50573	0.0270696
CUTA	51596	cutA divalent cation tolerance homolog	-0.558548	0.0172936
CWF19L1	55280	CWF19 like cell cycle control factor 1	-0.461175	0.019401
CXXC5	51523	CXXC finger protein 5	-0.684048	0.0117152
CYB561D2	11068	cytochrome b561 family member D2	-0.62642	0.00717429
DACT3	147906	dishevelled binding antagonist of beta catenin 3	-0.893205	0.00339266
DARS1	1615	aspartyl-tRNA synthetase 1	0.703487	0.00702646
DBI	1622	diazepam binding inhibitor, acyl-CoA binding protein	-0.502158	0.0171671
DCAKD	79877	dephospho-CoA kinase domain containing	0.47227	0.01915
DCLK1	9201	doublecortin like kinase 1	-1.01772	0.0205084
DCP1B	196513	decapping mRNA 1B	0.400427	0.0310194
DCP2	167227	decapping mRNA 2	0.765652	0.00513899
DCTN3	11258	dynactin subunit 3	-0.587347	0.00381546
DCTN4	51164	dynactin subunit 4	0.439877	0.0295146
DCUN1D3	123879	defective in cullin neddylation 1 domain containing 3	0.628579	0.0267076
DCXR	51181	dicarbonyl and L-xylulose reductase	-0.650914	0.004723
DDX17	10521	DEAD-box helicase 17	0.671535	0.00363845
DDX19B	11269	DEAD-box helicase 19B	-0.473528	0.0402222
DDX20	11218	DEAD-box helicase 20	0.591942	0.034969
DDX39A	10212	DExD-box helicase 39A	-0.545923	0.0354091
DDX3Y	8653	DEAD-box helicase 3 Y-linked	0.597168	0.0284542
DENND3	22898	DENN domain containing 3	-0.674153	0.0329959
DENND4B	9909	DENN domain containing 4B	0.434576	0.0299767
DENND5A	23258	DENN domain containing 5A	0.45587	0.017349
DGCR11	25786	DiGeorge syndrome critical region gene 11	-0.867417	0.0276504
DGCR6L	85359	DiGeorge syndrome critical region gene 6 like	-0.444679	0.030588
DHODH	1723	dihydroorotate dehydrogenase (quinone)	-1.36071	0.0284536
DHRS1	115817	dehydrogenase/reductase 1	-0.569663	0.0454114
DHRS9	10170	dehydrogenase/reductase 9	-0.966809	0.0119265
DIP2A	23181	disco interacting protein 2 homolog A	0.464185	0.0354633
DNAJC15	29103	DnaJ heat shock protein family (Hsp40) member C15	-0.536426	0.0472763
DNAJC16	23341	DnaJ heat shock protein family (Hsp40) member C16	1.05694	0.00219387
DNM1L	10059	dynamin 1 like	0.501717	0.0458037
DOCK11	139818	dedicator of cytokinesis 11	-0.621591	0.0466784
DPF1	8193	double PHD fingers 1	-1.55209	0.00541508
DPM3	54344	dolichyl-phosphate mannosyltransferase subunit 3, regulatory	-0.649275	0.0247722
DSN1	79980	DSN1 component of MIS12 kinetochore complex	-0.60738	0.0292636
DUSP16	80824	dual specificity phosphatase 16	1.05072	0.00554634
DYNC1LI2	1783	dynein cytoplasmic 1 light intermediate chain 2	0.415409	0.0295342
E2F3	1871	E2F transcription factor 3	0.398356	0.0402904
EDA2R	60401	ectodysplasin A2 receptor	0.526474	0.0400308
EDEM2	55741	ER degradation enhancing alpha-mannosidase like protein 2	-0.4942	0.008789
EDRF1	26098	erythroid differentiation regulatory factor 1	0.739491	0.00692663
EFCAB11	90141	EF-hand calcium binding domain 11	-0.929958	0.0123916
EFL1	79631	elongation factor like GTPase 1	0.428113	0.0464843
EGLN1	54583	egl-9 family hypoxia inducible factor 1	0.727601	0.014461
EIF2A	83939	eukaryotic translation initiation factor 2A	0.410799	0.028079
EIF3CL	728689	eukaryotic translation initiation factor 3 subunit C like	8.52006	0.0165933
EIF4A2	1974	eukaryotic translation initiation factor 4A2	0.455238	0.00972679
EIF4ENIF1	56478	eukaryotic translation initiation factor 4E nuclear import factor 1	0.66299	0.0171724
ELK3	2004	ETS transcription factor ELK3	0.514666	0.0278868
ELP3	55140	elongator acetyltransferase complex subunit 3	0.500043	0.0188528
ELP5	23587	elongator acetyltransferase complex subunit 5	-0.594093	0.009804
EMP3	2014	epithelial membrane protein 3	-0.468069	0.0424869
ENG	2022	endoglin	-0.37919	0.0445173
ENO1	2023	enolase 1	0.477625	0.00258024
ENO2	2026	enolase 2	0.818161	0.00546747
ENSA	2029	endosulfine alpha	-0.559207	0.00922767
EPN2	22905	epsin 2	0.619664	0.0241335
ERG28	11161	ergosterol biosynthesis 28 homolog	-0.494632	0.0317889
ERH	2079	ERH mRNA splicing and mitosis factor	-0.451598	0.0332583
ERI3	79033	ERI1 exoribonuclease family member 3	-0.490058	0.0102401
ERMAP	114625	erythroblast membrane associated protein (Scianna blood group)	0.510464	0.0455378
ETFB	2109	electron transfer flavoprotein subunit beta	-0.547788	0.0156727
ETFRF1	144363	electron transfer flavoprotein regulatory factor 1	-0.577102	0.0249589
ETHE1	23474	ETHE1 persulfide dioxygenase	-0.48881	0.00872143
ETS2	2114	ETS proto-oncogene 2, transcription factor	0.57008	0.0436388
EXOC1	55763	exocyst complex component 1	0.380274	0.0388237
EXOG	9941	exo/endonuclease G	-0.860931	0.0227674
EXOSC8	11340	exosome component 8	-0.531275	0.0244467
EYA3	2140	EYA transcriptional coactivator and phosphatase 3	0.851226	0.00116524
FABP5	2171	fatty acid binding protein 5	-0.783039	0.0188131
FAH	2184	fumarylacetoacetate hydrolase	-0.453635	0.0298752
FAM180A	389558	family with sequence similarity 180 member A	0.760134	0.0140912
FAM234B	57613	family with sequence similarity 234 member B	0.646777	0.0498159
FAM72A	729533	family with sequence similarity 72 member A	-0.955676	0.0354964
FANCC	2176	FA complementation group C	-1.25166	0.00386151
FAR2	55711	fatty acyl-CoA reductase 2	-0.949837	0.0223162
FARS2	10667	phenylalanyl-tRNA synthetase 2, mitochondrial	-0.84417	0.00661019
FBXL18	80028	F-box and leucine rich repeat protein 18	0.72403	0.0164086
FBXO17	115290	F-box protein 17	-0.397495	0.0419481
FDPS	2224	farnesyl diphosphate synthase	-0.672235	0.00214009
FDX1	2230	ferredoxin 1	-0.431452	0.0153087
FDX2	112812	ferredoxin 2	-0.520756	0.0400266
FEM1A	55527	fem-1 homolog A	0.523669	0.0249294
FGF11	2256	fibroblast growth factor 11	0.917655	0.0474441
FGF13	2258	fibroblast growth factor 13	-1.06255	0.0486168
FIBP	9158	FGF1 intracellular binding protein	-0.495315	0.0314497
FIS1	51024	fission, mitochondrial 1	-0.5909	0.0252926
FKBP5	2289	FKBP prolyl isomerase 5	-0.984563	0.0478739
FKBP9	11328	FKBP prolyl isomerase 9	0.473763	0.0290351
FLNC	2318	filamin C	0.493612	0.0307382
FLVCR1-DT	642946	FLVCR1 divergent transcript	-1.04424	0.0241634
FNBP1L	54874	formin binding protein 1 like	-1.30875	0.0213377
FOS	2353	Fos proto-oncogene, AP-1 transcription factor subunit	-0.875209	0.0274455
FOXRED2	80020	FAD dependent oxidoreductase domain containing 2	-0.925088	0.00359913
FUS	2521	FUS RNA binding protein	-0.701795	0.0108768
FXR1	8087	FMR1 autosomal homolog 1	0.370349	0.0424262
FXYD6	53826	FXYD domain containing ion transport regulator 6	-1.4329	0.00557321
GALM	130589	galactose mutarotase	-0.512823	0.0436967
GATAD1	57798	GATA zinc finger domain containing 1	0.561469	0.0129338
GBE1	2632	1,4-alpha-glucan branching enzyme 1	0.709142	0.00136912
GCAT	23464	glycine C-acetyltransferase	-0.370068	0.0471707
GCNT1	2650	glucosaminyl (N-acetyl) transferase 1	-1.02287	0.0323979
GCSH	2653	glycine cleavage system protein H	-0.612918	0.00883926
GET3	439	guided entry of tail-anchored proteins factor 3, ATPase	-0.329346	0.0458834
GFER	2671	growth factor, augmenter of liver regeneration	-0.575229	0.043734
GFM2	84340	G elongation factor mitochondrial 2	0.454388	0.0441789
GGA3	23163	golgi associated, gamma adaptin ear containing, ARF binding protein 3	1.08569	1.1285e-05
GGACT	87769	gamma-glutamylamine cyclotransferase	-0.954629	0.0284526
GGCT	79017	gamma-glutamylcyclotransferase	-0.367244	0.0310596
GLMP	112770	glycosylated lysosomal membrane protein	-0.384203	0.0161078
GLRX5	51218	glutaredoxin 5	-0.407422	0.0185243
GMDS-DT	100508120	GMDS divergent transcript	-1.21008	0.0403101
GMEB1	10691	glucocorticoid modulatory element binding protein 1	0.918018	0.00311386
GMPR	2766	guanosine monophosphate reductase	-1.89282	0.000240171
GNG10	2790	G protein subunit gamma 10	-0.464129	0.0295696
GNG2	54331	G protein subunit gamma 2	-0.91412	0.0208593
GOLGA2P7	388152	GOLGA2 pseudogene 7	0.543416	0.0438203
GOLGA6L4	643707	golgin A6 family like 4	1.37913	0.0319829
GOLGA8B	440270	golgin A8 family member B	1.62312	0.026596
GPATCH2L	55668	G-patch domain containing 2 like	0.73889	0.0170548
GPATCH8	23131	G-patch domain containing 8	0.596279	0.0105548
GPHN	10243	gephyrin	-1.33878	0.0281816
GPI	2821	glucose-6-phosphate isomerase	0.541967	0.00368122
GPM6B	2824	glycoprotein M6B	-1.26258	0.0180121
GPN3	51184	GPN-loop GTPase 3	-0.609737	0.01664
GPR1	2825	G protein-coupled receptor 1	-0.945267	0.0384843
GPR157	80045	G protein-coupled receptor 157	0.930225	0.035679
GPR89A	653519	G protein-coupled receptor 89A	-0.874913	0.00399696
GPX4	2879	glutathione peroxidase 4	-0.491664	0.00899545
GRB14	2888	growth factor receptor bound protein 14	-0.849957	0.0158752
GSTA4	2941	glutathione S-transferase alpha 4	-0.59526	0.0224719
GSTZ1	2954	glutathione S-transferase zeta 1	-0.666477	0.0120417
GTF2A2	2958	general transcription factor IIA subunit 2	-0.410282	0.0349017
GTF2E1	2960	general transcription factor IIE subunit 1	1.11267	7.85951e-06
GTF2H5	404672	general transcription factor IIH subunit 5	-0.545431	0.0230899
GTF2IRD1	9569	GTF2I repeat domain containing 1	-0.947696	0.0397861
GUK1	2987	guanylate kinase 1	-0.42769	0.0369708
GYG2	8908	glycogenin 2	-0.953542	0.030773
GYS1	2997	glycogen synthase 1	0.606958	0.0285017
H1-2	3006	H1.2 linker histone, cluster member	-0.603865	0.0474677
H2AJ	55766	H2A.J histone	-0.520438	0.00500302
H2AZ1	3015	H2A.Z variant histone 1	-0.556192	0.0173463
H2AZ2	94239	H2A.Z variant histone 2	-0.407239	0.0398672
HACL1	26061	2-hydroxyacyl-CoA lyase 1	-0.543543	0.0113862
HBA2	3040	hemoglobin subunit alpha 2	-1.85021	0.0256718
HDAC8	55869	histone deacetylase 8	-0.44443	0.0400341
HEATR5A	25938	HEAT repeat containing 5A	-0.427783	0.0232188
HECTD1	25831	HECT domain E3 ubiquitin protein ligase 1	0.42476	0.0359266
HELZ2	85441	helicase with zinc finger 2	0.664016	0.0435029
HERPUD1	9709	homocysteine inducible ER protein with ubiquitin like domain 1	-0.444573	0.0493199
HGH1	51236	HGH1 homolog	-0.491012	0.040276
HINT2	84681	histidine triad nucleotide binding protein 2	-0.70151	0.00677794
HMGB2	3148	high mobility group box 2	-0.807423	0.0398539
HMGB3	3149	high mobility group box 3	-0.894505	0.00265966
HOMEZ	57594	homeobox and leucine zipper encoding	-0.71594	0.0373585
HOXA-AS2	285943	HOXA cluster antisense RNA 2	-1.14505	0.0105402
HPS1	3257	HPS1 biogenesis of lysosomal organelles complex 3 subunit 1	-0.346106	0.0429311
HSD17B14	51171	hydroxysteroid 17-beta dehydrogenase 14	-0.828971	0.00189391
HSP90AA1	3320	heat shock protein 90 alpha family class A member 1	0.661282	0.00797183
HSPA1L	3305	heat shock protein family A (Hsp70) member 1 like	0.977846	0.0258607
HSPB11	51668	heat shock protein family B (small) member 11	-0.477573	0.0385794
HSPE1	3336	heat shock protein family E (Hsp10) member 1	-0.486305	0.0250973
HSPE1-MOB4	100529241	HSPE1-MOB4 readthrough	1.64994	0.019077
HTR7	3363	5-hydroxytryptamine receptor 7	-0.954649	0.00872442
HTRA3	94031	HtrA serine peptidase 3	0.549667	0.0320331
HYAL2	8692	hyaluronidase 2	-0.487082	0.0161045
HYPK	25764	huntingtin interacting protein K	-1.32377	0.041895
IDH2	3418	isocitrate dehydrogenase (NADP(+)) 2	-0.537362	0.0420949
IFI27L1	122509	interferon alpha inducible protein 27 like 1	-0.487274	0.0151941
IFI27L2	83982	interferon alpha inducible protein 27 like 2	-0.560736	0.0372403
IFI30	10437	IFI30 lysosomal thiol reductase	-0.404316	0.0230416
IFNAR2	3455	interferon alpha and beta receptor subunit 2	-0.533181	0.0132747
IFT27	11020	intraflagellar transport 27	-0.627444	0.00473979
IL11RA	3590	interleukin 11 receptor subunit alpha	-0.610438	0.0444917
IL36RN	26525	interleukin 36 receptor antagonist	0.956641	0.00572407
INTS14	81556	integrator complex subunit 14	-0.40241	0.0164608
INTS8	55656	integrator complex subunit 8	0.604364	0.0198033
IQSEC1	9922	IQ motif and Sec7 domain ArfGEF 1	0.48921	0.0337662
IQSEC3	440073	IQ motif and Sec7 domain ArfGEF 3	-1.8107	0.0227728
ISOC2	79763	isochorismatase domain containing 2	-0.655431	0.0090864
ITGAE	3682	integrin subunit alpha E	-0.542763	0.0313024
ITPA	3704	inosine triphosphatase	-0.710997	0.00535561
JADE3	9767	jade family PHD finger 3	0.612268	0.0222824
JRKL	8690	JRK like	0.588479	0.0246798
JTB	10899	jumping translocation breakpoint	-0.489041	0.00631173
KAT6A	7994	lysine acetyltransferase 6A	0.481088	0.0268783
KDM3A	55818	lysine demethylase 3A	0.652905	0.00626595
KDM3B	51780	lysine demethylase 3B	0.494391	0.00749358
KDM5A	5927	lysine demethylase 5A	0.649449	0.032504
KDM5B	10765	lysine demethylase 5B	0.447502	0.0406825
KHDC4	22889	KH domain containing 4, pre-mRNA splicing factor	0.756838	0.0262619
KIAA0586	9786	KIAA0586	-0.777154	0.0139331
KIAA1191	57179	KIAA1191	0.520595	0.0131139
KIDINS220	57498	kinase D interacting substrate 220	0.633737	0.0251011
KIF1C	10749	kinesin family member 1C	0.462813	0.0356365
KIF26B	55083	kinesin family member 26B	-1.49188	0.0306589
KLF2	10365	Kruppel like factor 2	-1.12854	0.00321058
KLF4	9314	Kruppel like factor 4	-0.618663	0.0274789
KLHL21	9903	kelch like family member 21	0.877767	0.0353843
KLHL28	54813	kelch like family member 28	0.817871	0.0230068
KLHL36	79786	kelch like family member 36	0.437156	0.0208098
KMT2D	8085	lysine methyltransferase 2D	0.639797	0.0411814
KNL1	57082	kinetochore scaffold 1	-2.16267	0.00600462
KRI1	65095	KRI1 homolog	0.57299	0.0487904
KRT10	3858	keratin 10	-0.546066	0.0315411
LAMTOR1	55004	late endosomal/lysosomal adaptor, MAPK and MTOR activator 1	-0.376939	0.0453068
LARP6	55323	La ribonucleoprotein 6, translational regulator	-0.483709	0.0165765
LCA5	167691	lebercilin LCA5	0.718423	0.0319086
LDHA	3939	lactate dehydrogenase A	0.753291	0.00879103
LEPR	3953	leptin receptor	0.911089	0.0246525
LETM1	3954	leucine zipper and EF-hand containing transmembrane protein 1	0.522988	0.0224472
LGALS3	3958	galectin 3	-0.45584	0.0146016
LINC-PINT	378805	long intergenic non-protein coding RNA, p53 induced transcript	-0.659871	0.0455509
LINC00536	100859921	long intergenic non-protein coding RNA 536	1.32651	0.038613
LINC01137	728431	long intergenic non-protein coding RNA 1137	-1.02685	0.0189305
LINC01184	644873	long intergenic non-protein coding RNA 1184	-0.69674	0.0232945
LINC01578	100507217	long intergenic non-protein coding RNA 1578	-0.543168	0.0247768
LINC02593	100130417	long intergenic non-protein coding RNA 2593	-1.17169	0.0429277
LIPE	3991	lipase E, hormone sensitive type	-1.37612	0.0490839
LMBRD2	92255	LMBR1 domain containing 2	0.560619	0.0313128
LMO2	4005	LIM domain only 2	-0.659032	0.0158515
LNPK	80856	lunapark, ER junction formation factor	1.0262	0.000719475
LOXL1	4016	lysyl oxidase like 1	-0.555485	0.0238593
LRCH3	84859	leucine rich repeats and calponin homology domain containing 3	0.841437	0.0030304
LRP5	4041	LDL receptor related protein 5	-0.511596	0.0376325
LRRC27	80313	leucine rich repeat containing 27	-0.92332	0.0140109
LRRC32	2615	leucine rich repeat containing 32	-0.57802	0.0387239
LRRC73	221424	leucine rich repeat containing 73	-1.01306	0.00520139
LRRFIP1	9208	LRR binding FLII interacting protein 1	0.42531	0.0485727
LSM10	84967	LSM10, U7 small nuclear RNA associated	-0.44712	0.029593
LSM2	57819	LSM2 homolog, U6 small nuclear RNA and mRNA degradation associated	-0.550381	0.0169248
LSM3	27258	LSM3 homolog, U6 small nuclear RNA and mRNA degradation associated	-0.576693	0.00818561
LSM7	51690	LSM7 homolog, U6 small nuclear RNA and mRNA degradation associated	-0.54419	0.0151854
LUC7L3	51747	LUC7 like 3 pre-mRNA splicing factor	0.903662	0.00982273
LYPD3	27076	LY6/PLAUR domain containing 3	-0.565136	0.0254036
LYPLAL1	127018	lysophospholipase like 1	-0.789683	0.0245711
LYRM7	90624	LYR motif containing 7	-0.913996	0.0293572
MAD2L2	10459	mitotic arrest deficient 2 like 2	-0.418668	0.0289254
MADD	8567	MAP kinase activating death domain	0.514732	0.0380738
MAGOHB	55110	mago homolog B, exon junction complex subunit	-0.560594	0.00840115
MALL	7851	mal, T cell differentiation protein like	-0.790844	0.0333704
MAML1	9794	mastermind like transcriptional coactivator 1	0.405526	0.0440983
MAN1B1-DT	100289341	MAN1B1 divergent transcript	-0.813323	0.0482969
MAP1S	55201	microtubule associated protein 1S	0.608006	0.0252002
MAP3K2-DT	100506922	MAP3K2 divergent transcript	-1.79359	0.000974156
MAP3K6	9064	mitogen-activated protein kinase kinase kinase 6	-0.792747	0.0187057
MAP9	79884	microtubule associated protein 9	0.712321	0.0102553
MAPK12	6300	mitogen-activated protein kinase 12	-0.681711	0.0160279
MAPK7	5598	mitogen-activated protein kinase 7	0.467189	0.023313
MAPKBP1	23005	mitogen-activated protein kinase binding protein 1	0.584567	0.0234693
MAST2	23139	microtubule associated serine/threonine kinase 2	0.519835	0.0484668
MAST3	23031	microtubule associated serine/threonine kinase 3	0.73204	0.015805
MAVS	57506	mitochondrial antiviral signaling protein	0.479661	0.0259762
MCL1	4170	MCL1 apoptosis regulator, BCL2 family member	0.515668	0.0262433
MCRIP1	348262	MAPK regulated corepressor interacting protein 1	-0.550365	0.00364944
MCTP1	79772	multiple C2 and transmembrane domain containing 1	-1.69741	0.0283824
MED1	5469	mediator complex subunit 1	0.511403	0.0349593
MEG8	79104	maternally expressed 8, small nucleolar RNA host gene	0.863345	0.0472379
MEGF8	1954	multiple EGF like domains 8	0.54083	0.0449879
METTL4	64863	methyltransferase like 4	-0.735365	0.0300041
MFAP1	4236	microfibril associated protein 1	0.303934	0.0381055
MFSD11	79157	major facilitator superfamily domain containing 11	-0.419761	0.0418956
MFSD4B	91749	major facilitator superfamily domain containing 4B	0.823619	0.0438641
MGST3	4259	microsomal glutathione S-transferase 3	-0.480914	0.0320307
MIEN1	84299	migration and invasion enhancer 1	-0.565986	0.014287
MIER3	166968	MIER family member 3	0.701949	0.0419686
MIF4GD	57409	MIF4G domain containing	-0.916505	0.00726075
MMAB	326625	metabolism of cobalamin associated B	-0.90629	0.0053737
MORN2	729967	MORN repeat containing 2	-0.552336	0.0349205
MPC1	51660	mitochondrial pyruvate carrier 1	-0.405034	0.041469
MPC2	25874	mitochondrial pyruvate carrier 2	-0.510098	0.00868473
MPHOSPH9	10198	M-phase phosphoprotein 9	-0.830826	0.0173772
MPV17L2	84769	MPV17 mitochondrial inner membrane protein like 2	-0.548743	0.00596865
MPZ	4359	myelin protein zero	1.62518	0.0103496
MREG	55686	melanoregulin	1.11422	0.0122615
MRPL11	65003	mitochondrial ribosomal protein L11	-0.756643	0.0265419
MRPL12	6182	mitochondrial ribosomal protein L12	-0.676441	0.0413309
MRPL14	64928	mitochondrial ribosomal protein L14	-0.557003	0.00712044
MRPL20	55052	mitochondrial ribosomal protein L20	-0.658349	0.0201242
MRPL21	219927	mitochondrial ribosomal protein L21	-0.450663	0.0453716
MRPL55	128308	mitochondrial ribosomal protein L55	-0.487851	0.0329673
MRPS16	51021	mitochondrial ribosomal protein S16	-0.610044	0.0282926
MRPS21	54460	mitochondrial ribosomal protein S21	-0.554243	0.0181413
MRPS24	64951	mitochondrial ribosomal protein S24	-0.484984	0.00619732
MRPS25	64432	mitochondrial ribosomal protein S25	-0.384385	0.0434106
MRPS31P5	100887750	mitochondrial ribosomal protein S31 pseudogene 5	1.42183	0.0189725
MSL1	339287	MSL complex subunit 1	0.382891	0.0249067
MT1X	4501	metallothionein 1X	-0.963007	0.0369073
MTF1	4520	metal regulatory transcription factor 1	0.664471	0.0325311
MTHFSD	64779	methenyltetrahydrofolate synthetase domain containing	1.1013	0.00140684
MTMR4	9110	myotubularin related protein 4	0.636877	0.0354264
MTMR9	66036	myotubularin related protein 9	0.49338	0.0358394
MTURN	222166	maturin, neural progenitor differentiation regulator homolog	-0.425528	0.0316219
MTX1	4580	metaxin 1	-0.411981	0.0425078
MVD	4597	mevalonate diphosphate decarboxylase	-0.429296	0.0428518
MYADM	91663	myeloid associated differentiation marker	0.639945	0.00401592
MYCT1	80177	MYC target 1	1.11254	0.0294406
MYEF2	50804	myelin expression factor 2	1.40225	0.00539617
MYL5	4636	myosin light chain 5	-0.647288	0.037838
MYO9A	4649	myosin IXA	0.508132	0.0330829
MYRF	745	myelin regulatory factor	-1.32921	0.0185418
N4BP2L2	10443	NEDD4 binding protein 2 like 2	0.396648	0.0266705
NAPA	8775	NSF attachment protein alpha	-0.471216	0.00425166
NATD1	256302	N-acetyltransferase domain containing 1	0.731537	0.00762781
NAXE	128240	NAD(P)HX epimerase	-0.679273	0.00419937
NBPF10	100132406	NBPF member 10	0.75201	0.0175575
NBPF15	284565	NBPF member 15	0.704112	0.0111318
NBPF19	101060226	NBPF member 19	1.00645	0.0390243
NBPF9	400818	NBPF member 9	0.593339	0.03376
NCOA2	10499	nuclear receptor coactivator 2	0.634858	0.0395294
NDUFA1	4694	NADH:ubiquinone oxidoreductase subunit A1	-0.491144	0.048449
NDUFA11	126328	NADH:ubiquinone oxidoreductase subunit A11	-0.619214	0.0244096
NDUFA2	4695	NADH:ubiquinone oxidoreductase subunit A2	-0.602216	0.00693893
NDUFA4	4697	NDUFA4 mitochondrial complex associated	-0.783024	0.0405356
NDUFAF6	137682	NADH:ubiquinone oxidoreductase complex assembly factor 6	-0.698819	0.0276114
NDUFB1	4707	NADH:ubiquinone oxidoreductase subunit B1	-0.694949	0.0421817
NDUFB11	54539	NADH:ubiquinone oxidoreductase subunit B11	-0.481375	0.0392648
NDUFB2	4708	NADH:ubiquinone oxidoreductase subunit B2	-0.605372	0.0124552
NDUFB6	4712	NADH:ubiquinone oxidoreductase subunit B6	-0.49601	0.0392251
NDUFB7	4713	NADH:ubiquinone oxidoreductase subunit B7	-0.573479	0.0406786
NDUFB8	4714	NADH:ubiquinone oxidoreductase subunit B8	-0.470823	0.0365209
NDUFB9	4715	NADH:ubiquinone oxidoreductase subunit B9	-0.451322	0.0355104
NDUFS5	4725	NADH:ubiquinone oxidoreductase subunit S5	-0.483376	0.0423406
NDUFS7	374291	NADH:ubiquinone oxidoreductase core subunit S7	-0.498571	0.0381512
NDUFS8	4728	NADH:ubiquinone oxidoreductase core subunit S8	-0.520349	0.0242171
NDUFV2	4729	NADH:ubiquinone oxidoreductase core subunit V2	-0.454443	0.00627609
NEFL	4747	neurofilament light	-0.93858	0.0427515
NEK9	91754	NIMA related kinase 9	0.500801	0.0342465
NEU1	4758	neuraminidase 1	-0.383881	0.0115776
NEU3	10825	neuraminidase 3	-0.718231	0.0261393
NFKBID	84807	NFKB inhibitor delta	-1.42043	0.00587832
NFYB	4801	nuclear transcription factor Y subunit beta	-0.569103	0.0178718
NIFK-AS1	254128	NIFK antisense RNA 1	-1.23683	0.0128927
NIPAL3	57185	NIPA like domain containing 3	0.439574	0.0411538
NISCH	11188	nischarin	0.56196	0.00868709
NKAPL	222698	NFKB activating protein like	1.09614	0.0298586
NKTR	4820	natural killer cell triggering receptor	0.641337	0.0196796
NMD3	51068	NMD3 ribosome export adaptor	0.455895	0.0452761
NME1	4830	NME/NM23 nucleoside diphosphate kinase 1	-0.786816	0.00785715
NME3	4832	NME/NM23 nucleoside diphosphate kinase 3	-0.599478	0.0428502
NMRAL2P	344887	NmrA like redox sensor 2, pseudogene	1.76059	0.0140898
NPIPA1	9284	nuclear pore complex interacting protein family member A1	1.07509	0.010893
NPIPA9	105376752	nuclear pore complex interacting protein family, member A9	1.1053	0.0281157
NPIPB3	23117	nuclear pore complex interacting protein family member B3	0.954334	0.0418835
NPIPB5	100132247	nuclear pore complex interacting protein family member B5	1.03439	0.0291557
NQO2	4835	N-ribosyldihydronicotinamide:quinone reductase 2	-0.361166	0.0405053
NRGN	4900	neurogranin	-1.0157	0.0226326
NSMCE4A	54780	NSE4 homolog A, SMC5-SMC6 complex component	-0.8224	0.0110089
NSRP1	84081	nuclear speckle splicing regulatory protein 1	0.712111	0.0213636
NT5C	30833	5', 3'-nucleotidase, cytosolic	-0.675318	0.0121166
NUBP2	10101	nucleotide binding protein 2	-0.461389	0.0192193
NUDT14	256281	nudix hydrolase 14	-0.853098	0.00818571
NUDT19	390916	nudix hydrolase 19	0.575712	0.0222322
NUDT8	254552	nudix hydrolase 8	-1.28556	0.00491125
NUMBL	9253	NUMB like endocytic adaptor protein	0.445613	0.0303398
NUP62	23636	nucleoporin 62	0.479412	0.0375184
NUSAP1	51203	nucleolar and spindle associated protein 1	-1.25547	0.0491298
OGT	8473	O-linked N-acetylglucosamine (GlcNAc) transferase	0.452998	0.0435854
OLFML2B	25903	olfactomedin like 2B	-1.04648	0.00583267
OPN3	23596	opsin 3	0.776261	0.00686402
ORC2	4999	origin recognition complex subunit 2	0.658182	0.0395672
ORMDL3	94103	ORMDL sphingolipid biosynthesis regulator 3	-0.476734	0.0451091
OSCP1	127700	organic solute carrier partner 1	-0.832917	0.0119276
OSGEP	55644	O-sialoglycoprotein endopeptidase	-0.910989	0.0122016
OSR2	116039	odd-skipped related transciption factor 2	-0.903877	0.0357994
OTULIN	90268	OTU deubiquitinase with linear linkage specificity	0.452367	0.0271011
OXNAD1	92106	oxidoreductase NAD binding domain containing 1	-0.573464	0.0242066
OXSR1	9943	oxidative stress responsive kinase 1	0.486106	0.0193517
P4HA1	5033	prolyl 4-hydroxylase subunit alpha 1	0.859527	0.00186388
PAFAH1B3	5050	platelet activating factor acetylhydrolase 1b catalytic subunit 3	-1.13095	0.00145113
PARP3	10039	poly(ADP-ribose) polymerase family member 3	0.39845	0.0297541
PATJ	10207	PATJ crumbs cell polarity complex component	1.30545	0.0278816
PCDH12	51294	protocadherin 12	2.30476	0.0131042
PCF11	51585	PCF11 cleavage and polyadenylation factor subunit	0.644313	0.0461532
PCIF1	63935	PDX1 C-terminal inhibiting factor 1	-0.440355	0.0408047
PCSK5	5125	proprotein convertase subtilisin/kexin type 5	-0.598815	0.0195153
PDCD6IP	10015	programmed cell death 6 interacting protein	0.634303	0.0187439
PDE4DIP	9659	phosphodiesterase 4D interacting protein	0.430875	0.00923915
PDGFA	5154	platelet derived growth factor subunit A	0.778346	0.0431199
PDHB	5162	pyruvate dehydrogenase E1 beta subunit	-0.541265	0.042447
PDK2	5164	pyruvate dehydrogenase kinase 2	-0.452435	0.0269439
PDXP	57026	pyridoxal phosphatase	-0.393697	0.0417357
PET117	100303755	PET117 cytochrome c oxidase chaperone	-0.51899	0.04987
PEX10	5192	peroxisomal biogenesis factor 10	-0.581301	0.0150191
PEX11A	8800	peroxisomal biogenesis factor 11 alpha	0.749647	0.0306856
PEX6	5190	peroxisomal biogenesis factor 6	0.795008	0.000415147
PFKP	5214	phosphofructokinase, platelet	0.355515	0.0336773
PGP	283871	phosphoglycolate phosphatase	-0.639574	0.00844948
PHKG2	5261	phosphorylase kinase catalytic subunit gamma 2	-0.467897	0.0399023
PHRF1	57661	PHD and ring finger domains 1	0.485938	0.00917592
PI4KAP2	375133	phosphatidylinositol 4-kinase alpha pseudogene 2	1.48458	0.00465706
PIGBOS1	101928527	PIGB opposite strand 1	-0.55009	0.0495431
PIN1	5300	peptidylprolyl cis/trans isomerase, NIMA-interacting 1	-0.387624	0.0228259
PITPNA-AS1	100306951	PITPNA antisense RNA 1	-1.14404	0.0119079
PIWIL4	143689	piwi like RNA-mediated gene silencing 4	1.30062	0.0218048
PKIG	11142	cAMP-dependent protein kinase inhibitor gamma	-0.500584	0.0288381
PLAU	5328	plasminogen activator, urokinase	-1.30106	0.000288367
PLEKHA8	84725	pleckstrin homology domain containing A8	0.636399	0.016605
PLEKHH2	130271	pleckstrin homology, MyTH4 and FERM domain containing H2	-1.61936	0.0246617
PLEKHH3	79990	pleckstrin homology, MyTH4 and FERM domain containing H3	-0.754771	0.0129861
PLEKHM3	389072	pleckstrin homology domain containing M3	0.803289	0.0424668
PLIN2	123	perilipin 2	0.587103	0.026724
PLK1	5347	polo like kinase 1	-1.13599	0.0473976
PLOD2	5352	procollagen-lysine,2-oxoglutarate 5-dioxygenase 2	1.08483	0.00125278
PLPBP	11212	pyridoxal phosphate binding protein	0.533132	0.0336973
PLPP1	8611	phospholipid phosphatase 1	-0.554528	0.0365741
PMF1	11243	polyamine modulated factor 1	-0.477101	0.0246636
PMM2	5373	phosphomannomutase 2	-0.493005	0.0188078
PMS2	5395	PMS1 homolog 2, mismatch repair system component	0.431714	0.0464135
PMS2P1	5379	PMS1 homolog 2, mismatch repair system component pseudogene 1	-0.615941	0.0413036
PMVK	10654	phosphomevalonate kinase	-0.713375	0.0444147
PNISR	25957	PNN interacting serine and arginine rich protein	0.927893	0.000692409
PNKD	25953	PNKD metallo-beta-lactamase domain containing	-0.700815	0.0175103
PNN	5411	pinin, desmosome associated protein	0.445394	0.024742
POC1A	25886	POC1 centriolar protein A	-1.11044	0.0135452
POGZ	23126	pogo transposable element derived with ZNF domain	0.617903	0.0212087
POLE3	54107	DNA polymerase epsilon 3, accessory subunit	-0.403405	0.0237079
POLG	5428	DNA polymerase gamma, catalytic subunit	0.803311	0.0148663
POLL	27343	DNA polymerase lambda	0.557383	0.0195044
POLR1B	84172	RNA polymerase I subunit B	0.643308	0.0314675
POLR2A	5430	RNA polymerase II subunit A	0.500955	0.0283087
POLR2G	5436	RNA polymerase II subunit G	-0.4592	0.0430685
POLR2J	5439	RNA polymerase II subunit J	-0.354647	0.0402355
POLR2L	5441	RNA polymerase II subunit L	-0.743194	0.0269881
POLR2M	81488	RNA polymerase II subunit M	0.565153	0.0472055
POLR3D	661	RNA polymerase III subunit D	0.375152	0.0464715
PPA2	27068	inorganic pyrophosphatase 2	-0.439054	0.0190923
PPCDC	60490	phosphopantothenoylcysteine decarboxylase	-0.837906	0.0125629
PPIAP22	653214	peptidylprolyl isomerase A pseudogene 22	-2.74917	0.0403669
PPID	5481	peptidylprolyl isomerase D	0.416412	0.0359241
PPIH	10465	peptidylprolyl isomerase H	-0.861409	0.0036659
PPIP5K2	23262	diphosphoinositol pentakisphosphate kinase 2	0.534017	0.0463101
PPP1R12B	4660	protein phosphatase 1 regulatory subunit 12B	1.39045	0.0330697
PPP1R26	9858	protein phosphatase 1 regulatory subunit 26	0.586311	0.0121297
PPP1R3G	648791	protein phosphatase 1 regulatory subunit 3G	0.814091	0.0426654
PPP1R7	5510	protein phosphatase 1 regulatory subunit 7	-0.377047	0.0458625
PPP2R2A	5520	protein phosphatase 2 regulatory subunit Balpha	0.569597	0.0138525
PPP2R5E	5529	protein phosphatase 2 regulatory subunit B'epsilon	0.50665	0.0443143
PPP4R3A	55671	protein phosphatase 4 regulatory subunit 3A	0.745329	0.0114974
PQBP1	10084	polyglutamine binding protein 1	-0.339084	0.0413018
PRADC1	84279	protease associated domain containing 1	-0.731724	0.0242545
PRDM8	56978	PR/SET domain 8	-0.587675	0.0402226
PRKY	5616	protein kinase Y-linked (pseudogene)	1.10968	0.0351261
PRMT7	54496	protein arginine methyltransferase 7	-0.650043	0.0375584
PRORP	9692	protein only RNase P catalytic subunit	-0.618525	0.0108282
PROSER1	80209	proline and serine rich 1	0.70117	0.0176749
PRPF38B	55119	pre-mRNA processing factor 38B	0.735489	0.000649515
PRPS1	5631	phosphoribosyl pyrophosphate synthetase 1	-0.618219	0.00863429
PRPSAP1	5635	phosphoribosyl pyrophosphate synthetase associated protein 1	-0.491379	0.00682549
PRRC2C	23215	proline rich coiled-coil 2C	0.675014	0.0427492
PRSS35	167681	serine protease 35	-1.5057	0.0497337
PRSS53	339105	serine protease 53	1.99178	0.0157079
PSEN2	5664	presenilin 2	-0.75718	0.0348924
PSMB10	5699	proteasome 20S subunit beta 10	-0.745354	0.0140934
PSMB8	5696	proteasome 20S subunit beta 8	-0.481815	0.00607061
PSME1	5720	proteasome activator subunit 1	-0.331336	0.0475567
PSME2	5721	proteasome activator subunit 2	-0.533675	0.00694464
PSMG1	8624	proteasome assembly chaperone 1	-0.631375	0.0193985
PSMG4	389362	proteasome assembly chaperone 4	-0.992385	0.0108823
PTGES	9536	prostaglandin E synthase	-0.812633	0.00573274
PTGES2	80142	prostaglandin E synthase 2	-0.474267	0.0313538
PTPMT1	114971	protein tyrosine phosphatase mitochondrial 1	-0.753615	0.00285152
PTPRF	5792	protein tyrosine phosphatase receptor type F	0.679164	0.0142975
PTTG1	9232	PTTG1 regulator of sister chromatid separation, securin	-1.0806	0.00713339
PUM2	23369	pumilio RNA binding family member 2	0.535671	0.0453176
PUS3	83480	pseudouridine synthase 3	0.560849	0.0310947
PUSL1	126789	pseudouridine synthase like 1	-0.554909	0.0401523
PVR	5817	PVR cell adhesion molecule	0.502112	0.0383443
PWWP2A	114825	PWWP domain containing 2A	0.564974	0.0402251
PYM1	84305	PYM homolog 1, exon junction complex associated factor	-0.383441	0.0454287
R3HCC1L	27291	R3H domain and coiled-coil containing 1 like	0.542696	0.0454396
RAB33B	83452	RAB33B, member RAS oncogene family	0.636466	0.0421075
RAB3B	5865	RAB3B, member RAS oncogene family	0.574352	0.0476041
RAB7B	338382	RAB7B, member RAS oncogene family	-1.63924	0.0210672
RAC3	5881	Rac family small GTPase 3	-0.605409	0.0407861
RAD1	5810	RAD1 checkpoint DNA exonuclease	-0.466696	0.0232194
RAMP2	10266	receptor activity modifying protein 2	-1.32395	0.0483494
RANGRF	29098	RAN guanine nucleotide release factor	-0.515637	0.0357142
RASGRF2	5924	Ras protein specific guanine nucleotide releasing factor 2	-0.598616	0.0283354
RBM10	8241	RNA binding motif protein 10	0.443678	0.0188788
RBM26	64062	RNA binding motif protein 26	0.449947	0.0152444
RBM27	54439	RNA binding motif protein 27	0.477537	0.0442215
RBM3	5935	RNA binding motif protein 3	-0.588215	0.0128434
RBM48	84060	RNA binding motif protein 48	0.999495	0.0106034
RBP1	5947	retinol binding protein 1	-0.688263	0.0148013
RBPMS	11030	RNA binding protein, mRNA processing factor	-0.420805	0.0318664
RCC1	1104	regulator of chromosome condensation 1	0.527555	0.0128673
RCHY1	25898	ring finger and CHY zinc finger domain containing 1	-0.611194	0.020677
RDH10	157506	retinol dehydrogenase 10	0.715364	0.0168806
REEP5	7905	receptor accessory protein 5	-0.377497	0.0416476
REST	5978	RE1 silencing transcription factor	0.520312	0.011489
REX1BD	55049	required for excision 1-B domain containing	-0.689968	0.0371728
RFC3	5983	replication factor C subunit 3	-0.755482	0.0207563
RFC4	5984	replication factor C subunit 4	-0.739145	0.0374964
RGP1	9827	RGP1 homolog, RAB6A GEF complex partner 1	0.447912	0.047499
RGS16	6004	regulator of G protein signaling 16	-0.769684	0.0385785
RGS3	5998	regulator of G protein signaling 3	-0.64778	0.000696151
RHOBTB1	9886	Rho related BTB domain containing 1	-0.625349	0.0351222
RIC8B	55188	RIC8 guanine nucleotide exchange factor B	0.646089	0.0279266
RIN3	79890	Ras and Rab interactor 3	-0.532539	0.0413449
RIPOR1	79567	RHO family interacting cell polarization regulator 1	0.447844	0.0147316
RIT1	6016	Ras like without CAAX 1	0.594623	0.0381831
RLF	6018	rearranged L-myc fusion	0.877275	0.0162092
RMND5A	64795	required for meiotic nuclear division 5 homolog A	0.754414	0.0476843
RNF111	54778	ring finger protein 111	0.61006	0.0433253
RNF114	55905	ring finger protein 114	-0.534945	0.020937
RNF40	9810	ring finger protein 40	0.551924	0.00719888
RNF5	6048	ring finger protein 5	-0.472479	0.0133094
ROMO1	140823	reactive oxygen species modulator 1	-0.71055	0.0270827
RPL17-C18orf32	100526842	RPL17-C18orf32 readthrough	1.26522	0.0104565
RPL22L1	200916	ribosomal protein L22 like 1	-0.702678	0.0411304
RPL41	6171	ribosomal protein L41	-0.417784	0.0489915
RPS12	6206	ribosomal protein S12	-0.446024	0.0372698
RPS14	6208	ribosomal protein S14	-0.390751	0.0395222
RREB1	6239	ras responsive element binding protein 1	0.474099	0.0423331
RRN3	54700	RRN3 homolog, RNA polymerase I transcription factor	0.65676	0.0200998
RSL1D1	26156	ribosomal L1 domain containing 1	0.465	0.0451054
RTN4	57142	reticulon 4	0.342208	0.0361163
RUBCN	9711	rubicon autophagy regulator	0.465493	0.0312011
S100A13	6284	S100 calcium binding protein A13	-0.707349	0.0320624
S100A3	6274	S100 calcium binding protein A3	-1.14329	0.00443986
SAAL1	113174	serum amyloid A like 1	-0.783302	0.018009
SACS	26278	sacsin molecular chaperone	0.672088	0.00498452
SAMD4A	23034	sterile alpha motif domain containing 4A	-0.587307	0.0388523
SAMHD1	25939	SAM and HD domain containing deoxynucleoside triphosphate triphosphohydrolase 1	0.596581	0.0309959
SBNO1	55206	strawberry notch homolog 1	0.584149	0.0165193
SCAF4	57466	SR-related CTD associated factor 4	0.515244	0.0433117
SCAND1	51282	SCAN domain containing 1	-0.627512	0.0313535
SCAND2P	54581	SCAN domain containing 2 pseudogene	0.936561	0.033003
SCFD2	152579	sec1 family domain containing 2	-0.782561	0.0363932
SCN1B	6324	sodium voltage-gated channel beta subunit 1	-0.625076	0.00656761
SCPEP1	59342	serine carboxypeptidase 1	0.357567	0.0230638
SCRN1	9805	secernin 1	0.49265	0.0285197
SCRN2	90507	secernin 2	-0.677212	0.0110724
SDF2L1	23753	stromal cell derived factor 2 like 1	-0.762863	0.00354386
SDR39U1	56948	short chain dehydrogenase/reductase family 39U member 1	-0.555679	0.0255896
SDSL	113675	serine dehydratase like	-1.0038	0.000555785
SELENBP1	8991	selenium binding protein 1	-0.658444	0.0480552
SEMA6D	80031	semaphorin 6D	-0.975715	0.0385631
SEPSECS-AS1	285540	SEPSECS antisense RNA 1 (head to head)	-1.49052	0.0496988
SETD2	29072	SET domain containing 2, histone lysine methyltransferase	0.57161	0.0200731
SETMAR	6419	SET domain and mariner transposase fusion gene	-0.58363	0.0428313
SF3B3	23450	splicing factor 3b subunit 3	0.50047	0.0319791
SF3B5	83443	splicing factor 3b subunit 5	-0.429567	0.0424689
SFI1	9814	SFI1 centrin binding protein	0.872726	0.0257913
SH2B1	25970	SH2B adaptor protein 1	0.453131	0.031723
SH3BP5L	80851	SH3 binding domain protein 5 like	0.428971	0.0277179
SH3D21	79729	SH3 domain containing 21	0.880703	0.00347868
SHISAL1	85352	shisa like 1	-0.51321	0.0261152
SHKBP1	92799	SH3KBP1 binding protein 1	-0.496426	0.028001
SIVA1	10572	SIVA1 apoptosis inducing factor	-0.54688	0.0209701
SLC16A1	6566	solute carrier family 16 member 1	0.532433	0.0377332
SLC29A1	2030	solute carrier family 29 member 1 (Augustine blood group)	-0.897011	0.0230214
SLC33A1	9197	solute carrier family 33 member 1	0.517893	0.0297968
SLC35A1	10559	solute carrier family 35 member A1	0.555881	0.0234901
SLC35B1	10237	solute carrier family 35 member B1	-0.353442	0.0436323
SLC39A3	29985	solute carrier family 39 member 3	-0.47964	0.0116275
SLC43A2	124935	solute carrier family 43 member 2	-0.675899	0.0170444
SLC6A17	388662	solute carrier family 6 member 17	-0.602696	0.0352046
SLCO3A1	28232	solute carrier organic anion transporter family member 3A1	-0.762452	0.00937026
SLF2	55719	SMC5-SMC6 complex localization factor 2	0.906057	0.000704045
SLIRP	81892	SRA stem-loop interacting RNA binding protein	-0.578261	0.0356965
SLX1A	548593	SLX1 homolog A, structure-specific endonuclease subunit	-1.02051	0.000695563
SLX4IP	128710	SLX4 interacting protein	0.728398	0.0400637
SMAP2	64744	small ArfGAP2	-0.438515	0.0481642
SMARCC2	6601	SWI/SNF related, matrix associated, actin dependent regulator of chromatin subfamily c member 2	0.690963	0.00638022
SMCR8	140775	SMCR8-C9orf72 complex subunit	0.734811	0.0192842
SMDT1	91689	single-pass membrane protein with aspartate rich tail 1	-0.507053	0.0257526
SMG1	23049	SMG1 nonsense mediated mRNA decay associated PI3K related kinase	0.760455	0.0148651
SMG7	9887	SMG7 nonsense mediated mRNA decay factor	0.544785	0.0479933
SMIM29	221491	small integral membrane protein 29	-0.417405	0.0402079
SMIM4	440957	small integral membrane protein 4	-0.826124	0.046135
SMIM7	79086	small integral membrane protein 7	-0.383539	0.035126
SMURF2	64750	SMAD specific E3 ubiquitin protein ligase 2	0.615327	0.0454127
SNAPC3	6619	small nuclear RNA activating complex polypeptide 3	0.628111	0.0103513
SNCA	6622	synuclein alpha	-1.01162	0.0478005
SNCB	6620	synuclein beta	-1.08985	0.0281855
SNHG11	128439	small nucleolar RNA host gene 11	-0.769769	0.0408356
SNHG16	100507246	small nucleolar RNA host gene 16	-0.339618	0.0231283
SNRNP25	79622	small nuclear ribonucleoprotein U11/U12 subunit 25	-0.682937	0.0362492
SNRPF	6636	small nuclear ribonucleoprotein polypeptide F	-0.525153	0.0210835
SNX16	64089	sorting nexin 16	0.769134	0.0183236
SOCS3	9021	suppressor of cytokine signaling 3	-0.591042	0.025864
SOGA1	140710	suppressor of glucose, autophagy associated 1	0.598939	0.0245463
SORD	6652	sorbitol dehydrogenase	0.50111	0.0368122
SPATC1L	84221	spermatogenesis and centriole associated 1 like	-0.853672	0.00569438
SPCS1	28972	signal peptidase complex subunit 1	-0.43877	0.0338568
SPCS3	60559	signal peptidase complex subunit 3	-0.352539	0.0393717
SPECC1	92521	sperm antigen with calponin homology and coiled-coil domains 1	-1.03653	0.0027289
SPG21	51324	SPG21 abhydrolase domain containing, maspardin	-0.402314	0.0149614
SPOCD1	90853	SPOC domain containing 1	-0.726611	0.00300165
SPOPL	339745	speckle type BTB/POZ protein like	0.713587	0.0257692
SPRED2	200734	sprouty related EVH1 domain containing 2	0.412713	0.0389162
SRRM1	10250	serine and arginine repetitive matrix 1	0.924535	0.01985
SRSF11	9295	serine and arginine rich splicing factor 11	0.504245	0.00619548
SS18L2	51188	SS18 like 2	-0.714847	0.00849277
SSH2	85464	slingshot protein phosphatase 2	-0.787542	0.00252958
ST20-AS1	283687	ST20 antisense RNA 1	-0.516094	0.0236422
ST6GALNAC4	27090	ST6 N-acetylgalactosaminide alpha-2,6-sialyltransferase 4	-0.784912	0.000148885
ST7-AS1	93653	ST7 antisense RNA 1	-1.88452	0.00109906
STARD10	10809	StAR related lipid transfer domain containing 10	-0.630948	0.00818989
STARD5	80765	StAR related lipid transfer domain containing 5	-1.23056	0.0411345
STK19	8859	serine/threonine kinase 19	-0.534074	0.0448419
STK35	140901	serine/threonine kinase 35	0.69449	0.0103546
STMP1	647087	short transmembrane mitochondrial protein 1	-0.445584	0.0140781
STOML1	9399	stomatin like 1	-0.601229	0.0167094
STPG1	90529	sperm tail PG-rich repeat containing 1	0.589083	0.017437
STX10	8677	syntaxin 10	-0.427586	0.0209746
SURF1	6834	SURF1 cytochrome c oxidase assembly factor	-0.345176	0.0398961
SVIL-AS1	102724316	SVIL antisense RNA 1	0.553325	0.0314536
SYNJ2	8871	synaptojanin 2	-0.604439	0.0108973
SYNRG	11276	synergin gamma	0.595321	0.029462
SYT1	6857	synaptotagmin 1	-1.16113	0.0137682
SYTL4	94121	synaptotagmin like 4	1.23209	0.0237974
TACO1	51204	translational activator of cytochrome c oxidase I	-0.439818	0.0108138
TAF13	6884	TATA-box binding protein associated factor 13	0.428474	0.0449971
TAF1C	9013	TATA-box binding protein associated factor, RNA polymerase I subunit C	0.627349	0.0223592
TAF9B	51616	TATA-box binding protein associated factor 9b	-1.01133	0.020753
TAPT1	202018	transmembrane anterior posterior transformation 1	0.557078	0.0286774
TASOR2	54906	transcription activation suppressor family member 2	0.525134	0.0211816
TAX1BP1	8887	Tax1 binding protein 1	0.446078	0.0242612
TCAF2	285966	TRPM8 channel associated factor 2	0.841614	0.0171616
TCEA2	6919	transcription elongation factor A2	-0.724609	0.000923844
TCF20	6942	transcription factor 20	0.63656	0.0409582
TCF7	6932	transcription factor 7	-0.531638	0.0243262
TECR	9524	trans-2,3-enoyl-CoA reductase	-0.301358	0.0491694
TFDP2	7029	transcription factor Dp-2	-0.722356	0.0138456
TFIP11	24144	tuftelin interacting protein 11	0.409034	0.0442762
TGFB3	7043	transforming growth factor beta 3	-1.15176	0.0050518
TGIF2	60436	TGFB induced factor homeobox 2	-0.710967	0.048271
THAP6	152815	THAP domain containing 6	0.669438	0.0405182
THNSL1	79896	threonine synthase like 1	0.838583	0.0207307
TIGD6	81789	tigger transposable element derived 6	0.532319	0.046198
TIMM10	26519	translocase of inner mitochondrial membrane 10	-0.73517	0.0104392
TIMM23B	100652748	translocase of inner mitochondrial membrane 23 homolog B	-0.833024	0.00513524
TIMM8B	26521	translocase of inner mitochondrial membrane 8 homolog B	-0.778676	0.00816078
TIPIN	54962	TIMELESS interacting protein	-0.681416	0.0333258
TJP1	7082	tight junction protein 1	0.644705	0.0233294
TKT	7086	transketolase	0.333777	0.0464602
TLE1	7088	TLE family member 1, transcriptional corepressor	-0.425568	0.0422803
TLK1	9874	tousled like kinase 1	0.564521	0.0483891
TM7SF2	7108	transmembrane 7 superfamily member 2	-1.35445	0.000758093
TMA7	51372	translation machinery associated 7 homolog	-0.53487	0.0106857
TMED5	50999	transmembrane p24 trafficking protein 5	0.51941	0.0430897
TMED7-TICAM2	100302736	TMED7-TICAM2 readthrough	0.774896	0.0278446
TMEM101	84336	transmembrane protein 101	-0.397439	0.0322988
TMEM119	338773	transmembrane protein 119	-1.25248	0.00422117
TMEM129	92305	transmembrane protein 129	-0.40345	0.0385227
TMEM141	85014	transmembrane protein 141	-0.510761	0.0479137
TMEM14B	81853	transmembrane protein 14B	-0.670886	0.00230794
TMEM160	54958	transmembrane protein 160	-0.797636	0.0476637
TMEM205	374882	transmembrane protein 205	-0.543356	0.0138052
TMEM209	84928	transmembrane protein 209	0.576631	0.0309673
TMEM256	254863	transmembrane protein 256	-0.897342	0.00981223
TMEM35A	59353	transmembrane protein 35A	-0.879373	0.0364583
TMEM42	131616	transmembrane protein 42	-0.607125	0.0415591
TMEM47	83604	transmembrane protein 47	0.749488	0.0454794
TMEM80	283232	transmembrane protein 80	-1.0326	0.000535141
TMEM97	27346	transmembrane protein 97	-0.801371	0.0111064
TMOD1	7111	tropomodulin 1	-1.38805	0.00846013
TMSB4XP4	7118	TMSB4X pseudogene 4	-0.967437	0.0280806
TNFAIP8L3	388121	TNF alpha induced protein 8 like 3	-0.637141	0.0268841
TNFRSF10D	8793	TNF receptor superfamily member 10d	0.597931	0.00192507
TOB2	10766	transducer of ERBB2, 2	0.459167	0.018054
TOMM22	56993	translocase of outer mitochondrial membrane 22	-0.51684	0.0178801
TOMM5	401505	translocase of outer mitochondrial membrane 5	-0.667668	0.00988068
TOMM6	100188893	translocase of outer mitochondrial membrane 6	-0.55191	0.0204473
TOP3B	8940	DNA topoisomerase III beta	0.782922	0.0357507
TOR1AIP2	163590	torsin 1A interacting protein 2	0.587099	0.0236446
TOR2A	27433	torsin family 2 member A	-0.749949	0.0199654
TP53BP2	7159	tumor protein p53 binding protein 2	0.500552	0.0465905
TP53TG1	11257	TP53 target 1	-0.798587	0.0191654
TRAPPC2L	51693	trafficking protein particle complex 2 like	-0.740004	0.0191824
TRIAP1	51499	TP53 regulated inhibitor of apoptosis 1	-0.411812	0.0286038
TRIM39	56658	tripartite motif containing 39	0.6736	0.0264191
TRIM52	84851	tripartite motif containing 52	1.02192	0.0294871
TROAP	10024	trophinin associated protein	-1.35081	0.0196262
TSC1	7248	TSC complex subunit 1	0.672935	0.00923479
TSEN34	79042	tRNA splicing endonuclease subunit 34	-0.368913	0.0487674
TSFM	10102	Ts translation elongation factor, mitochondrial	-0.657886	0.0149468
TSGA10	80705	testis specific 10	1.57368	0.0407089
TSPYL5	85453	TSPY like 5	0.442654	0.0379612
TTBK2	146057	tau tubulin kinase 2	0.669389	0.0123294
TTC17	55761	tetratricopeptide repeat domain 17	0.500614	0.0349985
TTC7B	145567	tetratricopeptide repeat domain 7B	0.551203	0.033692
TUSC2	11334	tumor suppressor 2, mitochondrial calcium regulator	-0.550654	0.0277963
TXLNA	200081	taxilin alpha	0.618572	0.00636863
TXNL4A	10907	thioredoxin like 4A	-0.460943	0.0331667
TYRP1	7306	tyrosinase related protein 1	-1.50098	0.0253319
UBA6	55236	ubiquitin like modifier activating enzyme 6	0.980967	0.00250056
UBE2E3	10477	ubiquitin conjugating enzyme E2 E3	-0.539555	0.0238866
UBE4A	9354	ubiquitination factor E4A	0.550717	0.0335553
UBFD1	56061	ubiquitin family domain containing 1	0.588347	0.00823086
UBL5	59286	ubiquitin like 5	-0.49082	0.0418257
UBQLN2	29978	ubiquilin 2	0.453848	0.0346426
UBTD1	80019	ubiquitin domain containing 1	-0.362911	0.0377987
UBXN11	91544	UBX domain protein 11	-1.20965	0.00282436
UCHL3	7347	ubiquitin C-terminal hydrolase L3	-0.467347	0.0378067
UHRF2	115426	ubiquitin like with PHD and ring finger domains 2	0.40194	0.0230315
UNC119B	84747	unc-119 lipid binding chaperone B	0.452279	0.0351227
UNKL	64718	unk like zinc finger	0.586806	0.0417889
UPF3B	65109	UPF3B regulator of nonsense mediated mRNA decay	0.682501	0.0256697
UQCRQ	27089	ubiquinol-cytochrome c reductase complex III subunit VII	-0.910988	0.0174553
USP10	9100	ubiquitin specific peptidase 10	0.455894	0.0379189
USP13	8975	ubiquitin specific peptidase 13	-0.555635	0.0471355
USPL1	10208	ubiquitin specific peptidase like 1	0.58973	0.0258097
UTY	7404	ubiquitously transcribed tetratricopeptide repeat containing, Y-linked	0.713783	0.033998
VMA21	203547	vacuolar ATPase assembly factor VMA21	-0.432575	0.0193331
VPS11	55823	VPS11 core subunit of CORVET and HOPS complexes	-0.360671	0.0483811
VPS35	55737	VPS35 retromer complex component	0.431663	0.0343698
VRK3	51231	VRK serine/threonine kinase 3	0.451759	0.030349
VWA5A	4013	von Willebrand factor A domain containing 5A	-0.810488	0.0370385
WAC-AS1	220906	WAC antisense RNA 1 (head to head)	-0.550748	0.0329469
WASHC4	23325	WASH complex subunit 4	0.687067	0.0424682
WDCP	80304	WD repeat and coiled coil containing	1.36686	0.00128658
WDFY2	115825	WD repeat and FYVE domain containing 2	0.78322	0.0382907
WDR47	22911	WD repeat domain 47	0.640189	0.0176518
WHAMMP3	339005	WAS protein homolog associated with actin, golgi membranes and microtubules pseudogene 3	1.31702	0.011433
WNK4	65266	WNK lysine deficient protein kinase 4	0.707032	0.0412216
XIAP	331	X-linked inhibitor of apoptosis	0.868315	0.000222684
YEATS2	55689	YEATS domain containing 2	0.891322	0.000634033
YTHDF2	51441	YTH N6-methyladenosine RNA binding protein 2	0.441151	0.0387681
ZBED4	9889	zinc finger BED-type containing 4	0.538906	0.038117
ZBED5-AS1	729013	ZBED5 antisense RNA 1	-0.937994	0.0180759
ZBTB1	22890	zinc finger and BTB domain containing 1	0.487955	0.0411798
ZBTB11	27107	zinc finger and BTB domain containing 11	0.411077	0.0449911
ZBTB21	49854	zinc finger and BTB domain containing 21	0.745682	0.0421861
ZBTB38	253461	zinc finger and BTB domain containing 38	0.712161	0.00785184
ZBTB40	9923	zinc finger and BTB domain containing 40	0.810622	0.00203078
ZBTB8OS	339487	zinc finger and BTB domain containing 8 opposite strand	-0.699979	0.00343465
ZC3HAV1	56829	zinc finger CCCH-type containing, antiviral 1	0.434027	0.0343347
ZDBF2	57683	zinc finger DBF-type containing 2	0.824135	0.0270778
ZDHHC1	29800	zinc finger DHHC-type containing 1	-0.598328	0.0147337
ZEB1	6935	zinc finger E-box binding homeobox 1	0.431367	0.0498059
ZEB2	9839	zinc finger E-box binding homeobox 2	0.55653	0.0261112
ZFP14	57677	ZFP14 zinc finger protein	-1.15409	0.0447973
ZFP30	22835	ZFP30 zinc finger protein	1.30624	0.00742476
ZFP36L1	677	ZFP36 ring finger protein like 1	0.49155	0.0367981
ZFP69	339559	ZFP69 zinc finger protein	0.903045	0.0396472
ZFP82	284406	ZFP82 zinc finger protein	0.728986	0.00347081
ZFPL1	7542	zinc finger protein like 1	-0.437032	0.03691
ZFPM1	161882	zinc finger protein, FOG family member 1	-0.58821	0.0240481
ZFR	51663	zinc finger RNA binding protein	0.555129	0.0178427
ZKSCAN1	7586	zinc finger with KRAB and SCAN domains 1	0.564989	0.0112033
ZKSCAN2	342357	zinc finger with KRAB and SCAN domains 2	0.544579	0.0161647
ZKSCAN5	23660	zinc finger with KRAB and SCAN domains 5	0.52604	0.0427918
ZKSCAN8	7745	zinc finger with KRAB and SCAN domains 8	0.694098	0.0147863
ZMYM1	79830	zinc finger MYM-type containing 1	0.746352	0.0419049
ZNF12	7559	zinc finger protein 12	0.520585	0.0343548
ZNF121	7675	zinc finger protein 121	0.647337	0.0499519
ZNF142	7701	zinc finger protein 142	1.07307	0.00309726
ZNF148	7707	zinc finger protein 148	0.624202	0.0391923
ZNF160	90338	zinc finger protein 160	0.824169	0.0053298
ZNF174	7727	zinc finger protein 174	-0.800593	0.0439099
ZNF175	7728	zinc finger protein 175	0.659163	0.0345133
ZNF181	339318	zinc finger protein 181	0.75835	0.0274761
ZNF211	10520	zinc finger protein 211	0.619969	0.0421828
ZNF23	7571	zinc finger protein 23	0.499677	0.0303309
ZNF239	8187	zinc finger protein 239	0.795372	0.048994
ZNF250	58500	zinc finger protein 250	0.840118	0.0222284
ZNF274	10782	zinc finger protein 274	0.483683	0.0319129
ZNF285	26974	zinc finger protein 285	1.11102	0.0240668
ZNF30	90075	zinc finger protein 30	0.922948	0.0450493
ZNF302	55900	zinc finger protein 302	0.57474	0.030374
ZNF322	79692	zinc finger protein 322	0.634738	0.00596164
ZNF337	26152	zinc finger protein 337	0.984154	0.000575287
ZNF354A	6940	zinc finger protein 354A	0.51986	0.0421551
ZNF354C	30832	zinc finger protein 354C	0.76366	0.04837
ZNF362	149076	zinc finger protein 362	-0.943781	0.0386484
ZNF37A	7587	zinc finger protein 37A	0.576683	0.0382423
ZNF382	84911	zinc finger protein 382	1.82894	0.0273092
ZNF384	171017	zinc finger protein 384	0.499593	0.0343377
ZNF398	57541	zinc finger protein 398	0.555968	0.0373424
ZNF428	126299	zinc finger protein 428	-0.732945	0.0117465
ZNF440	126070	zinc finger protein 440	0.82266	0.0216516
ZNF449	203523	zinc finger protein 449	1.03661	0.00205969
ZNF518B	85460	zinc finger protein 518B	0.75699	0.00626127
ZNF526	116115	zinc finger protein 526	0.723345	0.00584337
ZNF532	55205	zinc finger protein 532	0.512051	0.0327494
ZNF542P	147947	zinc finger protein 542, pseudogene	0.602219	0.0189699
ZNF558	148156	zinc finger protein 558	0.752945	0.0186583
ZNF576	79177	zinc finger protein 576	-0.590917	0.0296278
ZNF577	84765	zinc finger protein 577	1.38502	0.00536942
ZNF585A	199704	zinc finger protein 585A	-0.801612	0.0202532
ZNF596	169270	zinc finger protein 596	1.02702	0.0105029
ZNF605	100289635	zinc finger protein 605	0.934971	0.0123909
ZNF606	80095	zinc finger protein 606	0.580491	0.0374135
ZNF614	80110	zinc finger protein 614	0.608937	0.0310053
ZNF621	285268	zinc finger protein 621	0.521268	0.0163866
ZNF625-ZNF20	100529855	ZNF625-ZNF20 readthrough (NMD candidate)	-2.18331	0.0348079
ZNF646	9726	zinc finger protein 646	0.813595	0.0200367
ZNF654	55279	zinc finger protein 654	0.720732	0.0125456
ZNF671	79891	zinc finger protein 671	1.06325	0.0117842
ZNF680	340252	zinc finger protein 680	0.818032	0.0356773
ZNF701	55762	zinc finger protein 701	0.657367	0.0283775
ZNF74	7625	zinc finger protein 74	0.665242	0.0183946
ZNF75A	7627	zinc finger protein 75a	0.613965	0.0228703
ZNF770	54989	zinc finger protein 770	0.576325	0.0106855
ZNF841	284371	zinc finger protein 841	0.964701	0.027436
ZNF845	91664	zinc finger protein 845	0.580997	0.0237434
ZNHIT3	9326	zinc finger HIT-type containing 3	-0.430082	0.0142151
ZNNT1	115830329	ZNF706 neighboring transcript 1	1.25086	0.0311363
ZNRD2	10534	zinc ribbon domain containing 2	-0.562539	0.0379729
ZSCAN16-AS1	100129195	ZSCAN16 antisense RNA 1	-0.765699	0.0174527
ZSCAN22	342945	zinc finger and SCAN domain containing 22	0.699864	0.0439933
ZSWIM1	90204	zinc finger SWIM-type containing 1	0.666574	0.0424984
