# Supplementary material for: An organ-on-chip model of pulmonary arterial hypertension identifies a BMPR2-SOX17-prostacyclin signalling axis
Source: Commun Biol. 2022 Nov 7;5:1192. doi: 10.1038/s42003-022-04169-z (PMC9640600; doi:10.1038/s42003-022-04169-z)
Supplement: Supplementary file 11 — Supplementary Data 8 [file 42003_2022_4169_MOESM11_ESM.xlsx]

## Sheet: HALLMARK
NAME	GS<br> follow link to MSigDB	GS DETAILS	SIZE	ES	NES	NOM p-val	FDR q-val	FWER p-val	RANK AT MAX	LEADING EDGE
HALLMARK_MTORC1_SIGNALING	HALLMARK_MTORC1_SIGNALING	Details ...	44	0.330261	2.59689	0	0.00661235	0.004	476	tags=61%, list=29%, signal=84%
HALLMARK_HYPOXIA	HALLMARK_HYPOXIA	Details ...	43	0.30755	2.32948	0.00198413	0.0115967	0.015	573	tags=65%, list=35%, signal=98%
HALLMARK_UV_RESPONSE_UP	HALLMARK_UV_RESPONSE_UP	Details ...	30	0.310861	2.00935	0.00198807	0.0561392	0.103	861	tags=83%, list=53%, signal=173%
HALLMARK_E2F_TARGETS	HALLMARK_E2F_TARGETS	Details ...	40	0.250377	1.85513	0.0115385	0.121902	0.269	294	tags=43%, list=18%, signal=51%
HALLMARK_MYC_TARGETS_V1	HALLMARK_MYC_TARGETS_V1	Details ...	54	0.199338	1.71786	0.0254902	0.161805	0.475	1256	tags=96%, list=77%, signal=404%
HALLMARK_GLYCOLYSIS	HALLMARK_GLYCOLYSIS	Details ...	45	0.229406	1.76965	0.0277228	0.151804	0.399	324	tags=42%, list=20%, signal=51%
HALLMARK_ADIPOGENESIS	HALLMARK_ADIPOGENESIS	Details ...	37	0.224316	1.60873	0.0390625	0.200086	0.662	1185	tags=95%, list=73%, signal=338%
HALLMARK_APOPTOSIS	HALLMARK_APOPTOSIS	Details ...	20	0.289702	1.52524	0.0433925	0.262022	0.786	1164	tags=100%, list=71%, signal=344%
HALLMARK_UNFOLDED_PROTEIN_RESPONSE	HALLMARK_UNFOLDED_PROTEIN_RESPONSE	Details ...	33	0.243902	1.63167	0.0461538	0.202829	0.618	1241	tags=100%, list=76%, signal=409%
HALLMARK_G2M_CHECKPOINT	HALLMARK_G2M_CHECKPOINT	Details ...	37	0.202203	1.44653	0.0686071	0.336727	0.888	294	tags=38%, list=18%, signal=45%
HALLMARK_OXIDATIVE_PHOSPHORYLATION	HALLMARK_OXIDATIVE_PHOSPHORYLATION	Details ...	43	0.17747	1.35522	0.126706	0.438928	0.948	1349	tags=100%, list=83%, signal=561%
HALLMARK_TNFA_SIGNALING_VIA_NFKB	HALLMARK_TNFA_SIGNALING_VIA_NFKB	Details ...	30	0.197378	1.28636	0.157464	0.522963	0.983	1206	tags=93%, list=74%, signal=351%
HALLMARK_DNA_REPAIR	HALLMARK_DNA_REPAIR	Details ...	26	0.212137	1.27737	0.170082	0.497294	0.987	1102	tags=88%, list=68%, signal=268%
HALLMARK_ESTROGEN_RESPONSE_LATE	HALLMARK_ESTROGEN_RESPONSE_LATE	Details ...	15	0.268275	1.26813	0.196629	0.477083	0.988	762	tags=73%, list=47%, signal=136%
HALLMARK_BILE_ACID_METABOLISM	HALLMARK_BILE_ACID_METABOLISM	Details ...	7	0.377846	1.2302	0.209776	0.514509	0.994	1017	tags=100%, list=62%, signal=264%
HALLMARK_ALLOGRAFT_REJECTION	HALLMARK_ALLOGRAFT_REJECTION	Details ...	21	0.215838	1.20561	0.231225	0.495481	0.995	817	tags=71%, list=50%, signal=141%
HALLMARK_ESTROGEN_RESPONSE_EARLY	HALLMARK_ESTROGEN_RESPONSE_EARLY	Details ...	22	0.209034	1.18657	0.233471	0.500473	0.996	701	tags=64%, list=43%, signal=110%
HALLMARK_COAGULATION	HALLMARK_COAGULATION	Details ...	9	-0.317724	-1.16414	0.234469	1	1	936	tags=89%, list=57%, signal=207%
HALLMARK_PEROXISOME	HALLMARK_PEROXISOME	Details ...	15	0.270377	1.22171	0.238956	0.498496	0.994	1085	tags=93%, list=66%, signal=276%
HALLMARK_INTERFERON_ALPHA_RESPONSE	HALLMARK_INTERFERON_ALPHA_RESPONSE	Details ...	5	0.426552	1.18236	0.264113	0.481163	0.996	937	tags=100%, list=57%, signal=234%
HALLMARK_EPITHELIAL_MESENCHYMAL_TRANSITION	HALLMARK_EPITHELIAL_MESENCHYMAL_TRANSITION	Details ...	30	0.176904	1.13824	0.282609	0.530957	0.999	1130	tags=87%, list=69%, signal=277%
HALLMARK_MYOGENESIS	HALLMARK_MYOGENESIS		24	0.188433	1.10194	0.311015	0.56598	1	784	tags=67%, list=48%, signal=126%
HALLMARK_FATTY_ACID_METABOLISM	HALLMARK_FATTY_ACID_METABOLISM		28	0.174385	1.09542	0.328063	0.553105	1	885	tags=71%, list=54%, signal=153%
HALLMARK_MYC_TARGETS_V2	HALLMARK_MYC_TARGETS_V2		9	0.295543	1.07617	0.364542	0.561152	1	970	tags=89%, list=59%, signal=218%
HALLMARK_P53_PATHWAY	HALLMARK_P53_PATHWAY		30	0.1603	1.03907	0.375984	0.600602	1	1211	tags=90%, list=74%, signal=342%
HALLMARK_INTERFERON_GAMMA_RESPONSE	HALLMARK_INTERFERON_GAMMA_RESPONSE		23	0.177264	1.01487	0.41	0.594992	1	991	tags=78%, list=61%, signal=196%
HALLMARK_IL2_STAT5_SIGNALING	HALLMARK_IL2_STAT5_SIGNALING		22	0.176567	1.01404	0.415842	0.574133	1	234	tags=32%, list=14%, signal=37%
HALLMARK_KRAS_SIGNALING_DN	HALLMARK_KRAS_SIGNALING_DN		6	0.328413	1.01729	0.417625	0.614649	1	1097	tags=100%, list=67%, signal=304%
HALLMARK_UV_RESPONSE_DN	HALLMARK_UV_RESPONSE_DN		19	0.19891	1.00367	0.440385	0.571784	1	623	tags=58%, list=38%, signal=93%
HALLMARK_PI3K_AKT_MTOR_SIGNALING	HALLMARK_PI3K_AKT_MTOR_SIGNALING		15	0.206803	0.967119	0.477459	0.613569	1	535	tags=53%, list=33%, signal=79%
HALLMARK_HEME_METABOLISM	HALLMARK_HEME_METABOLISM	Details ...	25	-0.160996	-0.951454	0.48497	1	1	1309	tags=96%, list=80%, signal=478%
HALLMARK_CHOLESTEROL_HOMEOSTASIS	HALLMARK_CHOLESTEROL_HOMEOSTASIS		10	0.240691	0.947411	0.516765	0.624128	1	751	tags=70%, list=46%, signal=129%
HALLMARK_XENOBIOTIC_METABOLISM	HALLMARK_XENOBIOTIC_METABOLISM		25	0.155868	0.921847	0.526104	0.644279	1	793	tags=64%, list=49%, signal=123%
HALLMARK_ANGIOGENESIS	HALLMARK_ANGIOGENESIS	Details ...	5	-0.316902	-0.889262	0.588235	1	1	791	tags=80%, list=48%, signal=155%
HALLMARK_SPERMATOGENESIS	HALLMARK_SPERMATOGENESIS	Details ...	7	-0.267341	-0.8645	0.61753	1	1	266	tags=43%, list=16%, signal=51%
HALLMARK_TGF_BETA_SIGNALING	HALLMARK_TGF_BETA_SIGNALING		8	0.243842	0.832068	0.648221	0.748569	1	623	tags=63%, list=38%, signal=101%
HALLMARK_HEDGEHOG_SIGNALING	HALLMARK_HEDGEHOG_SIGNALING		6	0.273678	0.840017	0.650198	0.757888	1	1186	tags=100%, list=73%, signal=365%
HALLMARK_REACTIVE_OXYGEN_SPECIES_PATHWAY	HALLMARK_REACTIVE_OXYGEN_SPECIES_PATHWAY	Details ...	8	-0.238916	-0.819567	0.684524	1	1	1041	tags=88%, list=64%, signal=240%
HALLMARK_KRAS_SIGNALING_UP	HALLMARK_KRAS_SIGNALING_UP		14	0.180028	0.792904	0.740594	0.786364	1	990	tags=79%, list=61%, signal=198%
HALLMARK_INFLAMMATORY_RESPONSE	HALLMARK_INFLAMMATORY_RESPONSE	Details ...	13	-0.172851	-0.767627	0.759013	1	1	851	tags=69%, list=52%, signal=144%
HALLMARK_APICAL_JUNCTION	HALLMARK_APICAL_JUNCTION	Details ...	22	-0.126369	-0.702758	0.820359	0.942633	1	1207	tags=86%, list=74%, signal=327%
HALLMARK_PROTEIN_SECRETION	HALLMARK_PROTEIN_SECRETION	Details ...	14	-0.160692	-0.703885	0.833333	1	1	1373	tags=100%, list=84%, signal=625%
HALLMARK_IL6_JAK_STAT3_SIGNALING	HALLMARK_IL6_JAK_STAT3_SIGNALING		5	0.241303	0.693299	0.851626	0.898674	1	912	tags=80%, list=56%, signal=181%
HALLMARK_COMPLEMENT	HALLMARK_COMPLEMENT	Details ...	12	-0.161728	-0.691267	0.856566	0.852148	1	827	tags=67%, list=51%, signal=134%
HALLMARK_ANDROGEN_RESPONSE	HALLMARK_ANDROGEN_RESPONSE		17	0.139938	0.690954	0.87976	0.876675	1	1213	tags=88%, list=74%, signal=340%
HALLMARK_MITOTIC_SPINDLE	HALLMARK_MITOTIC_SPINDLE		38	0.092518	0.67303	0.884454	0.873659	1	281	tags=26%, list=17%, signal=31%

## Sheet: KEGG
NAME	GS<br> follow link to MSigDB	GS DETAILS	SIZE	ES	NES	NOM p-val	FDR q-val	FWER p-val	RANK AT MAX	LEADING EDGE
KEGG_GLYCOLYSIS_GLUCONEOGENESIS	KEGG_GLYCOLYSIS_GLUCONEOGENESIS	Details ...	15	0.570686	2.65442	0	0.00385544	0.003	273	tags=73%, list=17%, signal=87%
KEGG_MELANOGENESIS	KEGG_MELANOGENESIS	Details ...	5	-0.666011	-1.85488	0.0199203	0.310641	0.404	223	tags=80%, list=14%, signal=92%
KEGG_GALACTOSE_METABOLISM	KEGG_GALACTOSE_METABOLISM	Details ...	6	0.560886	1.73917	0.023166	0.701516	0.624	447	tags=83%, list=27%, signal=114%
KEGG_ANTIGEN_PROCESSING_AND_PRESENTATION	KEGG_ANTIGEN_PROCESSING_AND_PRESENTATION	Details ...	10	0.446363	1.72022	0.0238569	0.513849	0.665	91	tags=50%, list=6%, signal=53%
KEGG_FOCAL_ADHESION	KEGG_FOCAL_ADHESION	Details ...	28	0.26523	1.64882	0.0379242	0.547437	0.787	681	tags=68%, list=42%, signal=114%
KEGG_NOD_LIKE_RECEPTOR_SIGNALING_PATHWAY	KEGG_NOD_LIKE_RECEPTOR_SIGNALING_PATHWAY	Details ...	10	0.408015	1.58178	0.0393701	0.506983	0.88	806	tags=90%, list=49%, signal=177%
KEGG_PROPANOATE_METABOLISM	KEGG_PROPANOATE_METABOLISM	Details ...	7	0.499517	1.6467	0.0428571	0.442811	0.793	353	tags=71%, list=22%, signal=91%
KEGG_EPITHELIAL_CELL_SIGNALING_IN_HELICOBACTER_PYLORI_INFECTION	KEGG_EPITHELIAL_CELL_SIGNALING_IN_HELICOBACTER_PYLORI_INFECTION	Details ...	6	0.51476	1.53809	0.0623819	0.532124	0.93	794	tags=100%, list=49%, signal=194%
KEGG_GAP_JUNCTION	KEGG_GAP_JUNCTION	Details ...	7	-0.466286	-1.54876	0.0634921	0.763696	0.922	409	tags=71%, list=25%, signal=95%
KEGG_FATTY_ACID_METABOLISM	KEGG_FATTY_ACID_METABOLISM	Details ...	5	0.532268	1.50981	0.0693277	0.537693	0.952	765	tags=100%, list=47%, signal=188%
KEGG_LYSINE_DEGRADATION	KEGG_LYSINE_DEGRADATION	Details ...	5	0.532268	1.47876	0.0789474	0.554225	0.973	765	tags=100%, list=47%, signal=188%
KEGG_LONG_TERM_POTENTIATION	KEGG_LONG_TERM_POTENTIATION	Details ...	6	0.471095	1.41947	0.0927022	0.6438	0.99	593	tags=83%, list=36%, signal=130%
KEGG_ALZHEIMERS_DISEASE	KEGG_ALZHEIMERS_DISEASE	Details ...	24	-0.239428	-1.39916	0.105163	0.99758	0.994	840	tags=75%, list=51%, signal=152%
KEGG_PPAR_SIGNALING_PATHWAY	KEGG_PPAR_SIGNALING_PATHWAY	Details ...	7	0.42989	1.39323	0.107143	0.651975	0.994	233	tags=57%, list=14%, signal=66%
KEGG_PENTOSE_PHOSPHATE_PATHWAY	KEGG_PENTOSE_PHOSPHATE_PATHWAY	Details ...	5	0.497234	1.38406	0.109278	0.574973	0.995	822	tags=100%, list=50%, signal=201%
KEGG_PARKINSONS_DISEASE	KEGG_PARKINSONS_DISEASE	Details ...	23	-0.240063	-1.38921	0.111546	0.775824	0.997	821	tags=74%, list=50%, signal=147%
KEGG_SYSTEMIC_LUPUS_ERYTHEMATOSUS	KEGG_SYSTEMIC_LUPUS_ERYTHEMATOSUS	Details ...	6	0.4508	1.38509	0.115464	0.620676	0.995	354	tags=67%, list=22%, signal=85%
KEGG_CYSTEINE_AND_METHIONINE_METABOLISM	KEGG_CYSTEINE_AND_METHIONINE_METABOLISM	Details ...	5	0.493055	1.37074	0.143984	0.563641	0.996	176	tags=60%, list=11%, signal=67%
KEGG_FRUCTOSE_AND_MANNOSE_METABOLISM	KEGG_FRUCTOSE_AND_MANNOSE_METABOLISM	Details ...	6	0.444649	1.33089	0.147705	0.579014	0.999	92	tags=50%, list=6%, signal=53%
KEGG_MAPK_SIGNALING_PATHWAY	KEGG_MAPK_SIGNALING_PATHWAY	Details ...	26	0.215442	1.30517	0.153082	0.509091	0.999	469	tags=50%, list=29%, signal=69%
KEGG_ECM_RECEPTOR_INTERACTION	KEGG_ECM_RECEPTOR_INTERACTION	Details ...	9	0.367427	1.34168	0.155206	0.590613	0.997	672	tags=78%, list=41%, signal=131%
KEGG_AMINO_SUGAR_AND_NUCLEOTIDE_SUGAR_METABOLISM	KEGG_AMINO_SUGAR_AND_NUCLEOTIDE_SUGAR_METABOLISM	Details ...	9	0.352639	1.32219	0.1587	0.563307	0.999	152	tags=44%, list=9%, signal=49%
KEGG_PATHWAYS_IN_CANCER	KEGG_PATHWAYS_IN_CANCER		35	0.18431	1.28909	0.161616	0.490839	0.999	917	tags=74%, list=56%, signal=166%
KEGG_MTOR_SIGNALING_PATHWAY	KEGG_MTOR_SIGNALING_PATHWAY	Details ...	6	0.442804	1.30962	0.164583	0.526493	0.999	911	tags=100%, list=56%, signal=226%
KEGG_RNA_DEGRADATION	KEGG_RNA_DEGRADATION	Details ...	9	0.362497	1.31432	0.170833	0.546372	0.999	680	tags=78%, list=42%, signal=133%
KEGG_PROTEIN_EXPORT	KEGG_PROTEIN_EXPORT		6	0.436654	1.30209	0.178571	0.490114	0.999	377	tags=67%, list=23%, signal=86%
KEGG_ARGININE_AND_PROLINE_METABOLISM	KEGG_ARGININE_AND_PROLINE_METABOLISM		8	0.363916	1.26551	0.189409	0.510059	0.999	836	tags=88%, list=51%, signal=179%
KEGG_BLADDER_CANCER	KEGG_BLADDER_CANCER		7	0.384352	1.26126	0.196116	0.475749	0.999	307	tags=57%, list=19%, signal=70%
KEGG_PYRUVATE_METABOLISM	KEGG_PYRUVATE_METABOLISM		10	0.334155	1.26496	0.205451	0.489619	0.999	273	tags=50%, list=17%, signal=60%
KEGG_RIBOSOME	KEGG_RIBOSOME		44	0.15869	1.22234	0.21118	0.524723	1	1379	tags=100%, list=84%, signal=628%
KEGG_VIBRIO_CHOLERAE_INFECTION	KEGG_VIBRIO_CHOLERAE_INFECTION		7	0.368615	1.22201	0.215481	0.506263	1	1032	tags=100%, list=63%, signal=271%
KEGG_PROSTATE_CANCER	KEGG_PROSTATE_CANCER		7	0.371604	1.20691	0.22	0.515071	1	794	tags=86%, list=49%, signal=166%
KEGG_COLORECTAL_CANCER	KEGG_COLORECTAL_CANCER	Details ...	5	-0.428519	-1.20038	0.224532	1	1	283	tags=60%, list=17%, signal=72%
KEGG_CITRATE_CYCLE_TCA_CYCLE	KEGG_CITRATE_CYCLE_TCA_CYCLE	Details ...	7	-0.35622	-1.16865	0.236434	1	1	821	tags=86%, list=50%, signal=172%
KEGG_ERBB_SIGNALING_PATHWAY	KEGG_ERBB_SIGNALING_PATHWAY	Details ...	5	-0.406269	-1.13086	0.305785	1	1	972	tags=100%, list=60%, signal=247%
KEGG_GLYCEROLIPID_METABOLISM	KEGG_GLYCEROLIPID_METABOLISM		6	0.372694	1.12397	0.312992	0.65688	1	1025	tags=100%, list=63%, signal=268%
KEGG_CHRONIC_MYELOID_LEUKEMIA	KEGG_CHRONIC_MYELOID_LEUKEMIA	Details ...	9	-0.295543	-1.06525	0.338235	1	1	972	tags=89%, list=60%, signal=219%
KEGG_PYRIMIDINE_METABOLISM	KEGG_PYRIMIDINE_METABOLISM		16	0.220297	1.06444	0.339431	0.715064	1	255	tags=38%, list=16%, signal=44%
KEGG_VALINE_LEUCINE_AND_ISOLEUCINE_BIOSYNTHESIS	KEGG_VALINE_LEUCINE_AND_ISOLEUCINE_BIOSYNTHESIS		5	0.398033	1.08071	0.348485	0.725968	1	657	tags=80%, list=40%, signal=133%
KEGG_RENAL_CELL_CARCINOMA	KEGG_RENAL_CELL_CARCINOMA		10	0.272257	1.07213	0.350701	0.720115	1	863	tags=80%, list=53%, signal=169%
KEGG_APOPTOSIS	KEGG_APOPTOSIS		9	0.292257	1.0617	0.368313	0.698927	1	794	tags=78%, list=49%, signal=151%
KEGG_INSULIN_SIGNALING_PATHWAY	KEGG_INSULIN_SIGNALING_PATHWAY		20	0.192928	1.0387	0.373254	0.726537	1	912	tags=75%, list=56%, signal=168%
KEGG_VALINE_LEUCINE_AND_ISOLEUCINE_DEGRADATION	KEGG_VALINE_LEUCINE_AND_ISOLEUCINE_DEGRADATION		7	0.31244	1.02643	0.403509	0.731101	1	657	tags=71%, list=40%, signal=119%
KEGG_OXIDATIVE_PHOSPHORYLATION	KEGG_OXIDATIVE_PHOSPHORYLATION		23	0.175264	1.02352	0.404669	0.697225	1	1349	tags=100%, list=83%, signal=569%
KEGG_UBIQUITIN_MEDIATED_PROTEOLYSIS	KEGG_UBIQUITIN_MEDIATED_PROTEOLYSIS		17	0.206192	1.02528	0.423554	0.712803	1	242	tags=35%, list=15%, signal=41%
KEGG_VEGF_SIGNALING_PATHWAY	KEGG_VEGF_SIGNALING_PATHWAY		9	0.269665	0.987528	0.452632	0.711414	1	468	tags=56%, list=29%, signal=77%
KEGG_GLYOXYLATE_AND_DICARBOXYLATE_METABOLISM	KEGG_GLYOXYLATE_AND_DICARBOXYLATE_METABOLISM		6	0.329028	0.996839	0.457086	0.731632	1	280	tags=50%, list=17%, signal=60%
KEGG_CYTOSOLIC_DNA_SENSING_PATHWAY	KEGG_CYTOSOLIC_DNA_SENSING_PATHWAY		7	0.301451	0.995189	0.457529	0.71569	1	908	tags=86%, list=56%, signal=192%
KEGG_CARDIAC_MUSCLE_CONTRACTION	KEGG_CARDIAC_MUSCLE_CONTRACTION		7	0.305231	0.967959	0.471545	0.71604	1	1135	tags=100%, list=70%, signal=327%
KEGG_GLYCEROPHOSPHOLIPID_METABOLISM	KEGG_GLYCEROPHOSPHOLIPID_METABOLISM	Details ...	8	-0.280788	-0.972437	0.482625	1	1	769	tags=75%, list=47%, signal=141%
KEGG_VASCULAR_SMOOTH_MUSCLE_CONTRACTION	KEGG_VASCULAR_SMOOTH_MUSCLE_CONTRACTION		13	0.220079	0.972981	0.49692	0.723899	1	647	tags=62%, list=40%, signal=101%
KEGG_HUNTINGTONS_DISEASE	KEGG_HUNTINGTONS_DISEASE	Details ...	34	-0.138298	-0.952472	0.500924	1	1	836	tags=65%, list=51%, signal=130%
KEGG_BASE_EXCISION_REPAIR	KEGG_BASE_EXCISION_REPAIR	Details ...	5	-0.342102	-0.933385	0.506986	1	1	750	tags=80%, list=46%, signal=148%
KEGG_PEROXISOME	KEGG_PEROXISOME		11	0.227637	0.923296	0.523166	0.788	1	1262	tags=100%, list=77%, signal=438%
KEGG_PURINE_METABOLISM	KEGG_PURINE_METABOLISM		27	0.14981	0.920825	0.526946	0.775504	1	363	tags=37%, list=22%, signal=47%
KEGG_RIG_I_LIKE_RECEPTOR_SIGNALING_PATHWAY	KEGG_RIG_I_LIKE_RECEPTOR_SIGNALING_PATHWAY		8	0.264163	0.916084	0.542802	0.767194	1	794	tags=75%, list=49%, signal=145%
KEGG_ENDOCYTOSIS	KEGG_ENDOCYTOSIS		19	0.175906	0.914477	0.54845	0.75346	1	746	tags=63%, list=46%, signal=115%
KEGG_T_CELL_RECEPTOR_SIGNALING_PATHWAY	KEGG_T_CELL_RECEPTOR_SIGNALING_PATHWAY		8	0.264163	0.910449	0.557576	0.744766	1	794	tags=75%, list=49%, signal=145%
KEGG_ADHERENS_JUNCTION	KEGG_ADHERENS_JUNCTION	Details ...	7	-0.288	-0.927065	0.564356	1	1	1165	tags=100%, list=71%, signal=348%
KEGG_CYTOKINE_CYTOKINE_RECEPTOR_INTERACTION	KEGG_CYTOKINE_CYTOKINE_RECEPTOR_INTERACTION		9	0.243582	0.898606	0.571134	0.750738	1	873	tags=78%, list=53%, signal=166%
KEGG_GLIOMA	KEGG_GLIOMA	Details ...	5	-0.322434	-0.909442	0.572314	1	1	782	tags=80%, list=48%, signal=153%
KEGG_JAK_STAT_SIGNALING_PATHWAY	KEGG_JAK_STAT_SIGNALING_PATHWAY	Details ...	6	-0.303813	-0.898635	0.590317	1	1	867	tags=83%, list=53%, signal=177%
KEGG_WNT_SIGNALING_PATHWAY	KEGG_WNT_SIGNALING_PATHWAY	Details ...	17	-0.177709	-0.859507	0.615984	1	1	578	tags=53%, list=35%, signal=81%
KEGG_PROGESTERONE_MEDIATED_OOCYTE_MATURATION	KEGG_PROGESTERONE_MEDIATED_OOCYTE_MATURATION	Details ...	7	-0.267604	-0.859761	0.634615	1	1	965	tags=86%, list=59%, signal=209%
KEGG_SMALL_CELL_LUNG_CANCER	KEGG_SMALL_CELL_LUNG_CANCER		10	0.21418	0.824154	0.668675	0.852747	1	794	tags=70%, list=49%, signal=135%
KEGG_FC_GAMMA_R_MEDIATED_PHAGOCYTOSIS	KEGG_FC_GAMMA_R_MEDIATED_PHAGOCYTOSIS		8	0.238916	0.82888	0.678161	0.861804	1	835	tags=75%, list=51%, signal=153%
KEGG_PANCREATIC_CANCER	KEGG_PANCREATIC_CANCER		12	0.188889	0.781115	0.695146	0.875587	1	917	tags=75%, list=56%, signal=170%
KEGG_ADIPOCYTOKINE_SIGNALING_PATHWAY	KEGG_ADIPOCYTOKINE_SIGNALING_PATHWAY		9	0.219552	0.794785	0.709163	0.886209	1	912	tags=78%, list=56%, signal=175%
KEGG_AMINOACYL_TRNA_BIOSYNTHESIS	KEGG_AMINOACYL_TRNA_BIOSYNTHESIS		12	0.185802	0.788928	0.719512	0.878745	1	922	tags=75%, list=56%, signal=171%
KEGG_TIGHT_JUNCTION	KEGG_TIGHT_JUNCTION		11	0.193988	0.773682	0.723077	0.839348	1	278	tags=36%, list=17%, signal=44%
KEGG_ACUTE_MYELOID_LEUKEMIA	KEGG_ACUTE_MYELOID_LEUKEMIA	Details ...	5	-0.288875	-0.788146	0.731755	1	1	1163	tags=100%, list=71%, signal=347%
KEGG_CELL_CYCLE	KEGG_CELL_CYCLE		16	0.163366	0.773091	0.745263	0.825749	1	1367	tags=100%, list=84%, signal=610%
KEGG_SPLICEOSOME	KEGG_SPLICEOSOME		34	0.113892	0.777938	0.747104	0.848374	1	345	tags=32%, list=21%, signal=40%
KEGG_P53_SIGNALING_PATHWAY	KEGG_P53_SIGNALING_PATHWAY		13	0.17689	0.76845	0.749027	0.818687	1	968	tags=77%, list=59%, signal=188%
KEGG_AXON_GUIDANCE	KEGG_AXON_GUIDANCE		13	0.176842	0.780094	0.754032	0.861294	1	717	tags=62%, list=44%, signal=109%
KEGG_OOCYTE_MEIOSIS	KEGG_OOCYTE_MEIOSIS		14	0.166873	0.764118	0.755694	0.81132	1	545	tags=50%, list=33%, signal=74%
KEGG_TOLL_LIKE_RECEPTOR_SIGNALING_PATHWAY	KEGG_TOLL_LIKE_RECEPTOR_SIGNALING_PATHWAY	Details ...	7	-0.238945	-0.757873	0.779559	1	1	79	tags=29%, list=5%, signal=30%
KEGG_NATURAL_KILLER_CELL_MEDIATED_CYTOTOXICITY	KEGG_NATURAL_KILLER_CELL_MEDIATED_CYTOTOXICITY		8	0.21367	0.748521	0.782979	0.819424	1	468	tags=50%, list=29%, signal=70%
KEGG_CHEMOKINE_SIGNALING_PATHWAY	KEGG_CHEMOKINE_SIGNALING_PATHWAY		13	0.171616	0.747835	0.784861	0.806883	1	851	tags=69%, list=52%, signal=144%
KEGG_CALCIUM_SIGNALING_PATHWAY	KEGG_CALCIUM_SIGNALING_PATHWAY		7	-0.213363	-0.684854	0.836614	1	1	820	tags=71%, list=50%, signal=143%
KEGG_PATHOGENIC_ESCHERICHIA_COLI_INFECTION	KEGG_PATHOGENIC_ESCHERICHIA_COLI_INFECTION	Details ...	9	-0.18587	-0.687955	0.841046	1	1	606	tags=56%, list=37%, signal=88%
KEGG_SNARE_INTERACTIONS_IN_VESICULAR_TRANSPORT	KEGG_SNARE_INTERACTIONS_IN_VESICULAR_TRANSPORT	Details ...	6	-0.228782	-0.693937	0.844358	1	1	989	tags=83%, list=61%, signal=211%
KEGG_B_CELL_RECEPTOR_SIGNALING_PATHWAY	KEGG_B_CELL_RECEPTOR_SIGNALING_PATHWAY		11	0.168302	0.689187	0.85389	0.867384	1	468	tags=45%, list=29%, signal=63%
KEGG_RNA_POLYMERASE	KEGG_RNA_POLYMERASE		6	-0.223862	-0.676228	0.858921	1	1	725	tags=67%, list=44%, signal=120%
KEGG_NEUROTROPHIN_SIGNALING_PATHWAY	KEGG_NEUROTROPHIN_SIGNALING_PATHWAY		14	0.150627	0.679994	0.861057	0.864497	1	921	tags=71%, list=56%, signal=163%
KEGG_LYSOSOME	KEGG_LYSOSOME		9	-0.180119	-0.677386	0.86406	1	1	434	tags=44%, list=27%, signal=60%
KEGG_LEUKOCYTE_TRANSENDOTHELIAL_MIGRATION	KEGG_LEUKOCYTE_TRANSENDOTHELIAL_MIGRATION		7	-0.201582	-0.640672	0.891051	1	1	606	tags=57%, list=37%, signal=91%
KEGG_VASOPRESSIN_REGULATED_WATER_REABSORPTION	KEGG_VASOPRESSIN_REGULATED_WATER_REABSORPTION		9	-0.161019	-0.595041	0.945892	1	1	465	tags=44%, list=28%, signal=62%
KEGG_REGULATION_OF_ACTIN_CYTOSKELETON	KEGG_REGULATION_OF_ACTIN_CYTOSKELETON		26	-0.0959862	-0.573151	0.958084	0.992367	1	1165	tags=81%, list=71%, signal=278%
KEGG_CELL_ADHESION_MOLECULES_CAMS	KEGG_CELL_ADHESION_MOLECULES_CAMS		6	-0.159902	-0.486689	0.988119	0.99077	1	557	tags=50%, list=34%, signal=76%

## Sheet: Reactome
NAME	GS<br> follow link to MSigDB	GS DETAILS	SIZE	ES	NES	NOM p-val	FDR q-val	FWER p-val	RANK AT MAX	LEADING EDGE
REACTOME_HSF1_ACTIVATION	REACTOME_HSF1_ACTIVATION	Details ...	12	0.728395	3.12184	0	0	0	451	tags=100%, list=28%, signal=137%
REACTOME_ATTENUATION_PHASE	REACTOME_ATTENUATION_PHASE	Details ...	11	0.727946	2.91779	0	0	0	451	tags=100%, list=28%, signal=137%
REACTOME_CELLULAR_RESPONSE_TO_HEAT_STRESS	REACTOME_CELLULAR_RESPONSE_TO_HEAT_STRESS	Details ...	25	0.48122	2.88932	0	0	0	466	tags=76%, list=29%, signal=105%
REACTOME_HSF1_DEPENDENT_TRANSACTIVATION	REACTOME_HSF1_DEPENDENT_TRANSACTIVATION	Details ...	12	0.644444	2.73621	0	0.00144068	0.004	451	tags=92%, list=28%, signal=126%
REACTOME_REGULATION_OF_HSF1_MEDIATED_HEAT_SHOCK_RESPONSE	REACTOME_REGULATION_OF_HSF1_MEDIATED_HEAT_SHOCK_RESPONSE	Details ...	22	0.493224	2.73519	0	0.00115255	0.004	466	tags=77%, list=29%, signal=107%
REACTOME_RAC3_GTPASE_CYCLE	REACTOME_RAC3_GTPASE_CYCLE	Details ...	12	-0.47963	-2.02584	0.00409836	0.357494	0.697	448	tags=75%, list=27%, signal=103%
REACTOME_SIGNALING_BY_GPCR	REACTOME_SIGNALING_BY_GPCR	Details ...	31	-0.309162	-2.03992	0.00614754	0.654438	0.665	401	tags=55%, list=25%, signal=71%
REACTOME_CELLULAR_RESPONSES_TO_EXTERNAL_STIMULI	REACTOME_CELLULAR_RESPONSES_TO_EXTERNAL_STIMULI	Details ...	138	0.144782	1.95449	0.00622407	0.381699	0.841	1190	tags=86%, list=73%, signal=291%
REACTOME_TRANSLATION	REACTOME_TRANSLATION	Details ...	116	0.158789	1.96238	0.00831601	0.419062	0.826	1334	tags=97%, list=82%, signal=491%
REACTOME_G_ALPHA_12_13_SIGNALLING_EVENTS	REACTOME_G_ALPHA_12_13_SIGNALLING_EVENTS	Details ...	8	-0.527094	-1.82591	0.0102881	0.819224	0.985	573	tags=88%, list=35%, signal=134%
REACTOME_GLYCOLYSIS	REACTOME_GLYCOLYSIS	Details ...	16	0.394183	1.86824	0.0109689	0.55652	0.968	280	tags=56%, list=17%, signal=67%
REACTOME_TRIGLYCERIDE_CATABOLISM	REACTOME_TRIGLYCERIDE_CATABOLISM	Details ...	5	0.660725	1.8509	0.014	0.549412	0.982	556	tags=100%, list=34%, signal=151%
REACTOME_HSP90_CHAPERONE_CYCLE_FOR_STEROID_HORMONE_RECEPTORS_SHR	REACTOME_HSP90_CHAPERONE_CYCLE_FOR_STEROID_HORMONE_RECEPTORS_SHR	Details ...	17	0.364087	1.80191	0.0160966	0.590872	0.997	467	tags=65%, list=29%, signal=90%
REACTOME_POST_TRANSLATIONAL_PROTEIN_MODIFICATION	REACTOME_POST_TRANSLATIONAL_PROTEIN_MODIFICATION	Details ...	166	0.121148	1.74228	0.0161943	0.73824	0.997	952	tags=69%, list=58%, signal=149%
REACTOME_RHOC_GTPASE_CYCLE	REACTOME_RHOC_GTPASE_CYCLE	Details ...	12	-0.402469	-1.74458	0.0191571	0.765523	0.997	573	tags=75%, list=35%, signal=115%
REACTOME_RHOF_GTPASE_CYCLE	REACTOME_RHOF_GTPASE_CYCLE	Details ...	5	-0.631223	-1.75657	0.0203252	0.900319	0.997	606	tags=100%, list=37%, signal=159%
REACTOME_COLLAGEN_FORMATION	REACTOME_COLLAGEN_FORMATION	Details ...	11	0.455667	1.80971	0.0219561	0.619719	0.997	744	tags=91%, list=46%, signal=166%
REACTOME_GPCR_LIGAND_BINDING	REACTOME_GPCR_LIGAND_BINDING	Details ...	11	-0.402557	-1.6475	0.0227273	0.626427	0.999	387	tags=64%, list=24%, signal=83%
REACTOME_METABOLISM_OF_RNA	REACTOME_METABOLISM_OF_RNA	Details ...	142	0.127989	1.70149	0.0237154	0.574237	0.998	1107	tags=80%, list=68%, signal=226%
REACTOME_REGULATION_OF_INSULIN_LIKE_GROWTH_FACTOR_IGF_TRANSPORT_AND_UPTAKE_BY_INSULIN_LIKE_GROWTH_FACTOR_BINDING_PROTEINS_IGFBPS	REACTOME_REGULATION_OF_INSULIN_LIKE_GROWTH_FACTOR_IGF_TRANSPORT_AND_UPTAKE_BY_INSULIN_LIKE_GROWTH_FACTOR_BINDING_PROTEINS_IGFBPS	Details ...	11	0.417419	1.72007	0.0257937	0.582037	0.998	806	tags=91%, list=49%, signal=178%
REACTOME_ERCC6_CSB_AND_EHMT2_G9A_POSITIVELY_REGULATE_RRNA_EXPRESSION	REACTOME_ERCC6_CSB_AND_EHMT2_G9A_POSITIVELY_REGULATE_RRNA_EXPRESSION	Details ...	7	0.539604	1.71692	0.0259481	0.559434	0.998	521	tags=86%, list=32%, signal=125%
REACTOME_SIGNALING_BY_CYTOSOLIC_FGFR1_FUSION_MUTANTS	REACTOME_SIGNALING_BY_CYTOSOLIC_FGFR1_FUSION_MUTANTS	Details ...	6	-0.54674	-1.66814	0.0260521	0.629432	0.999	472	tags=83%, list=29%, signal=117%
REACTOME_NUCLEOTIDE_SALVAGE	REACTOME_NUCLEOTIDE_SALVAGE		6	0.54182	1.69016	0.0272374	0.551996	1	206	tags=67%, list=13%, signal=76%
REACTOME_ANCHORING_OF_THE_BASAL_BODY_TO_THE_PLASMA_MEMBRANE	REACTOME_ANCHORING_OF_THE_BASAL_BODY_TO_THE_PLASMA_MEMBRANE	Details ...	16	-0.352104	-1.7118	0.0283401	0.648381	0.998	656	tags=75%, list=40%, signal=124%
REACTOME_POTENTIAL_THERAPEUTICS_FOR_SARS	REACTOME_POTENTIAL_THERAPEUTICS_FOR_SARS	Details ...	14	0.390871	1.72277	0.0296443	0.608946	0.998	882	tags=93%, list=54%, signal=200%
REACTOME_INFECTIOUS_DISEASE	REACTOME_INFECTIOUS_DISEASE		138	0.128689	1.67493	0.0308642	0.542434	1	1013	tags=74%, list=62%, signal=178%
REACTOME_NEUTROPHIL_DEGRANULATION	REACTOME_NEUTROPHIL_DEGRANULATION	Details ...	61	0.190283	1.74069	0.0316206	0.686311	0.997	904	tags=74%, list=55%, signal=159%
REACTOME_TRIGLYCERIDE_METABOLISM	REACTOME_TRIGLYCERIDE_METABOLISM		6	0.514145	1.54722	0.033264	0.769569	1	795	tags=100%, list=49%, signal=194%
REACTOME_DEUBIQUITINATION	REACTOME_DEUBIQUITINATION		36	0.225982	1.59845	0.0337302	0.647794	1	1089	tags=89%, list=67%, signal=261%
REACTOME_GLUCOSE_METABOLISM	REACTOME_GLUCOSE_METABOLISM	Details ...	20	0.331886	1.73164	0.0344828	0.66575	0.997	280	tags=50%, list=17%, signal=60%
REACTOME_APOPTOSIS	REACTOME_APOPTOSIS		26	0.281445	1.6784	0.035124	0.557307	1	1179	tags=100%, list=72%, signal=355%
REACTOME_CHAPERONE_MEDIATED_AUTOPHAGY	REACTOME_CHAPERONE_MEDIATED_AUTOPHAGY		9	0.45841	1.66149	0.0352251	0.555462	1	343	tags=67%, list=21%, signal=84%
REACTOME_RAC2_GTPASE_CYCLE	REACTOME_RAC2_GTPASE_CYCLE	Details ...	8	-0.478448	-1.67023	0.0357853	0.701378	0.999	448	tags=75%, list=27%, signal=103%
REACTOME_CHROMATIN_MODIFYING_ENZYMES	REACTOME_CHROMATIN_MODIFYING_ENZYMES	Details ...	29	0.271474	1.72562	0.0358566	0.641359	0.998	1027	tags=90%, list=63%, signal=238%
REACTOME_RHOB_GTPASE_CYCLE	REACTOME_RHOB_GTPASE_CYCLE	Details ...	11	-0.426	-1.7225	0.0389105	0.717171	0.998	349	tags=64%, list=21%, signal=80%
REACTOME_METABOLISM_OF_CARBOHYDRATES	REACTOME_METABOLISM_OF_CARBOHYDRATES	Details ...	41	0.223452	1.69195	0.0427184	0.573286	1	559	tags=56%, list=34%, signal=83%
REACTOME_SIGNALING_BY_FGFR1_IN_DISEASE	REACTOME_SIGNALING_BY_FGFR1_IN_DISEASE	Details ...	8	-0.46367	-1.55575	0.042735	0.80438	1	472	tags=75%, list=29%, signal=105%
REACTOME_GLUCONEOGENESIS	REACTOME_GLUCONEOGENESIS		8	0.471059	1.60078	0.0439331	0.664711	1	254	tags=63%, list=16%, signal=74%
REACTOME_PROGRAMMED_CELL_DEATH	REACTOME_PROGRAMMED_CELL_DEATH		30	0.251561	1.62359	0.044	0.61817	1	1228	tags=100%, list=75%, signal=397%
REACTOME_SARS_COV_INFECTIONS	REACTOME_SARS_COV_INFECTIONS		25	0.265937	1.59018	0.044898	0.651045	1	355	tags=48%, list=22%, signal=60%
REACTOME_PKMTS_METHYLATE_HISTONE_LYSINES	REACTOME_PKMTS_METHYLATE_HISTONE_LYSINES		6	0.51476	1.53886	0.0475207	0.750674	1	794	tags=100%, list=49%, signal=194%
REACTOME_COLLAGEN_BIOSYNTHESIS_AND_MODIFYING_ENZYMES	REACTOME_COLLAGEN_BIOSYNTHESIS_AND_MODIFYING_ENZYMES		9	0.451222	1.63072	0.0514851	0.62049	1	536	tags=78%, list=33%, signal=115%
REACTOME_FORMATION_OF_ATP_BY_CHEMIOSMOTIC_COUPLING	REACTOME_FORMATION_OF_ATP_BY_CHEMIOSMOTIC_COUPLING	Details ...	6	-0.509225	-1.54701	0.0563674	0.774955	1	533	tags=83%, list=33%, signal=123%
REACTOME_RHOG_GTPASE_CYCLE	REACTOME_RHOG_GTPASE_CYCLE	Details ...	13	-0.34423	-1.52012	0.057377	0.713953	1	448	tags=62%, list=27%, signal=84%
REACTOME_INTERFERON_SIGNALING	REACTOME_INTERFERON_SIGNALING		24	0.262438	1.53471	0.0582329	0.741807	1	937	tags=83%, list=57%, signal=193%
REACTOME_NUCLEOTIDE_BINDING_DOMAIN_LEUCINE_RICH_REPEAT_CONTAINING_RECEPTOR_NLR_SIGNALING_PATHWAYS	REACTOME_NUCLEOTIDE_BINDING_DOMAIN_LEUCINE_RICH_REPEAT_CONTAINING_RECEPTOR_NLR_SIGNALING_PATHWAYS		10	0.40185	1.52645	0.060166	0.748798	1	816	tags=90%, list=50%, signal=179%
REACTOME_MITOCHONDRIAL_PROTEIN_IMPORT	REACTOME_MITOCHONDRIAL_PROTEIN_IMPORT	Details ...	7	-0.473846	-1.53248	0.0602637	0.717075	1	863	tags=100%, list=53%, signal=211%
REACTOME_CELLULAR_SENESCENCE	REACTOME_CELLULAR_SENESCENCE		23	0.267355	1.51748	0.0616302	0.735991	1	917	tags=83%, list=56%, signal=186%
REACTOME_SIGNALING_BY_FGFR_IN_DISEASE	REACTOME_SIGNALING_BY_FGFR_IN_DISEASE	Details ...	10	-0.413933	-1.57044	0.063655	0.822208	1	472	tags=70%, list=29%, signal=98%
REACTOME_UB_SPECIFIC_PROCESSING_PROTEASES	REACTOME_UB_SPECIFIC_PROCESSING_PROTEASES		29	0.232796	1.45836	0.0643863	0.823828	1	1089	tags=90%, list=67%, signal=265%
REACTOME_RHOA_GTPASE_CYCLE	REACTOME_RHOA_GTPASE_CYCLE	Details ...	20	-0.290323	-1.5436	0.0649087	0.731023	1	349	tags=50%, list=21%, signal=63%
REACTOME_INTERLEUKIN_4_AND_INTERLEUKIN_13_SIGNALING	REACTOME_INTERLEUKIN_4_AND_INTERLEUKIN_13_SIGNALING		16	0.318688	1.54261	0.0675944	0.761422	1	912	tags=88%, list=56%, signal=196%
REACTOME_BBSOME_MEDIATED_CARGO_TARGETING_TO_CILIUM	REACTOME_BBSOME_MEDIATED_CARGO_TARGETING_TO_CILIUM		5	0.510756	1.45161	0.0714286	0.829934	1	800	tags=100%, list=49%, signal=196%
REACTOME_CYTOKINE_SIGNALING_IN_IMMUNE_SYSTEM	REACTOME_CYTOKINE_SIGNALING_IN_IMMUNE_SYSTEM		72	0.15235	1.46162	0.0717213	0.832449	1	940	tags=72%, list=58%, signal=163%
REACTOME_RHO_GTPASES_ACTIVATE_PKNS	REACTOME_RHO_GTPASES_ACTIVATE_PKNS		13	0.330974	1.46257	0.0727273	0.849845	1	593	tags=69%, list=36%, signal=108%
REACTOME_WNT5A_DEPENDENT_INTERNALIZATION_OF_FZD2_FZD5_AND_ROR2	REACTOME_WNT5A_DEPENDENT_INTERNALIZATION_OF_FZD2_FZD5_AND_ROR2		5	0.543946	1.52184	0.0729783	0.742807	1	746	tags=100%, list=46%, signal=184%
REACTOME_WNT5A_DEPENDENT_INTERNALIZATION_OF_FZD4	REACTOME_WNT5A_DEPENDENT_INTERNALIZATION_OF_FZD4		5	0.543946	1.48973	0.073724	0.812521	1	746	tags=100%, list=46%, signal=184%
REACTOME_RRNA_PROCESSING	REACTOME_RRNA_PROCESSING		61	0.160407	1.47329	0.0785441	0.853448	1	1379	tags=100%, list=84%, signal=621%
REACTOME_SENESCENCE_ASSOCIATED_SECRETORY_PHENOTYPE_SASP	REACTOME_SENESCENCE_ASSOCIATED_SECRETORY_PHENOTYPE_SASP		18	0.280256	1.43929	0.0869565	0.855649	1	816	tags=78%, list=50%, signal=154%
REACTOME_TRANSCRIPTIONAL_REGULATION_BY_VENTX	REACTOME_TRANSCRIPTIONAL_REGULATION_BY_VENTX		7	0.439385	1.46346	0.0878243	0.867885	1	917	tags=100%, list=56%, signal=227%
REACTOME_INTRINSIC_PATHWAY_FOR_APOPTOSIS	REACTOME_INTRINSIC_PATHWAY_FOR_APOPTOSIS		7	0.439385	1.40242	0.0890688	0.880399	1	917	tags=100%, list=56%, signal=227%
REACTOME_NRAGE_SIGNALS_DEATH_THROUGH_JNK	REACTOME_NRAGE_SIGNALS_DEATH_THROUGH_JNK	Details ...	8	-0.413793	-1.44	0.0912621	0.906385	1	349	tags=63%, list=21%, signal=79%
REACTOME_THE_CITRIC_ACID_TCA_CYCLE_AND_RESPIRATORY_ELECTRON_TRANSPORT	REACTOME_THE_CITRIC_ACID_TCA_CYCLE_AND_RESPIRATORY_ELECTRON_TRANSPORT	Details ...	40	-0.199623	-1.45049	0.0923379	0.916752	1	948	tags=78%, list=58%, signal=180%
REACTOME_INHIBITION_OF_DNA_RECOMBINATION_AT_TELOMERE	REACTOME_INHIBITION_OF_DNA_RECOMBINATION_AT_TELOMERE		6	0.4508	1.3907	0.0963115	0.886005	1	354	tags=67%, list=22%, signal=85%
REACTOME_UNFOLDED_PROTEIN_RESPONSE_UPR	REACTOME_UNFOLDED_PROTEIN_RESPONSE_UPR		27	0.230807	1.42431	0.101449	0.870995	1	777	tags=70%, list=48%, signal=132%
REACTOME_SIGNALING_BY_ROBO_RECEPTORS	REACTOME_SIGNALING_BY_ROBO_RECEPTORS		56	0.159899	1.40484	0.102564	0.889887	1	1379	tags=100%, list=84%, signal=623%
REACTOME_SIGNALING_BY_RETINOIC_ACID	REACTOME_SIGNALING_BY_RETINOIC_ACID	Details ...	7	-0.430154	-1.42778	0.103647	0.905437	1	934	tags=100%, list=57%, signal=233%
REACTOME_EUKARYOTIC_TRANSLATION_INITIATION	REACTOME_EUKARYOTIC_TRANSLATION_INITIATION		60	0.160305	1.41502	0.104247	0.887863	1	1379	tags=100%, list=84%, signal=621%
REACTOME_FGFR1_MUTANT_RECEPTOR_ACTIVATION	REACTOME_FGFR1_MUTANT_RECEPTOR_ACTIVATION		7	-0.427516	-1.38573	0.105477	0.975493	1	472	tags=71%, list=29%, signal=100%
REACTOME_ASSOCIATION_OF_TRIC_CCT_WITH_TARGET_PROTEINS_DURING_BIOSYNTHESIS	REACTOME_ASSOCIATION_OF_TRIC_CCT_WITH_TARGET_PROTEINS_DURING_BIOSYNTHESIS		12	0.345062	1.42564	0.106122	0.885559	1	800	tags=83%, list=49%, signal=162%
REACTOME_SYNTHESIS_OF_ACTIVE_UBIQUITIN_ROLES_OF_E1_AND_E2_ENZYMES	REACTOME_SYNTHESIS_OF_ACTIVE_UBIQUITIN_ROLES_OF_E1_AND_E2_ENZYMES		6	0.457565	1.3856	0.107075	0.887766	1	343	tags=67%, list=21%, signal=84%
REACTOME_RESPONSE_TO_ELEVATED_PLATELET_CYTOSOLIC_CA2	REACTOME_RESPONSE_TO_ELEVATED_PLATELET_CYTOSOLIC_CA2		14	0.308317	1.38427	0.1079	0.876807	1	899	tags=86%, list=55%, signal=189%
REACTOME_PRE_NOTCH_EXPRESSION_AND_PROCESSING	REACTOME_PRE_NOTCH_EXPRESSION_AND_PROCESSING		6	0.4508	1.38193	0.108974	0.869149	1	354	tags=67%, list=22%, signal=85%
REACTOME_AUTOPHAGY	REACTOME_AUTOPHAGY		24	0.236318	1.37598	0.110442	0.860752	1	571	tags=58%, list=35%, signal=88%
REACTOME_CDC42_GTPASE_CYCLE	REACTOME_CDC42_GTPASE_CYCLE	Details ...	17	-0.282972	-1.38895	0.110883	1	1	312	tags=47%, list=19%, signal=58%
REACTOME_TRANSCRIPTIONAL_REGULATION_OF_GRANULOPOIESIS	REACTOME_TRANSCRIPTIONAL_REGULATION_OF_GRANULOPOIESIS		5	0.512969	1.4058	0.111332	0.90438	1	470	tags=80%, list=29%, signal=112%
REACTOME_RAC1_GTPASE_CYCLE	REACTOME_RAC1_GTPASE_CYCLE		21	-0.25317	-1.38537	0.111554	0.932381	1	448	tags=52%, list=27%, signal=71%
REACTOME_MET_PROMOTES_CELL_MOTILITY	REACTOME_MET_PROMOTES_CELL_MOTILITY		9	0.367427	1.35643	0.115308	0.870434	1	672	tags=78%, list=41%, signal=131%
REACTOME_DNA_DOUBLE_STRAND_BREAK_RESPONSE	REACTOME_DNA_DOUBLE_STRAND_BREAK_RESPONSE		10	0.361529	1.39635	0.115854	0.884188	1	555	tags=70%, list=34%, signal=105%
REACTOME_INNATE_IMMUNE_SYSTEM	REACTOME_INNATE_IMMUNE_SYSTEM		115	0.114058	1.37457	0.117083	0.850579	1	1089	tags=77%, list=67%, signal=216%
REACTOME_REGULATION_OF_EXPRESSION_OF_SLITS_AND_ROBOS	REACTOME_REGULATION_OF_EXPRESSION_OF_SLITS_AND_ROBOS		52	0.159494	1.35208	0.118677	0.872284	1	1379	tags=100%, list=84%, signal=625%
REACTOME_RRNA_MODIFICATION_IN_THE_NUCLEUS_AND_CYTOSOL	REACTOME_RRNA_MODIFICATION_IN_THE_NUCLEUS_AND_CYTOSOL		10	0.360296	1.37223	0.119097	0.843927	1	557	tags=70%, list=34%, signal=106%
REACTOME_SELECTIVE_AUTOPHAGY	REACTOME_SELECTIVE_AUTOPHAGY		14	0.294897	1.34474	0.123016	0.855605	1	571	tags=64%, list=35%, signal=98%
REACTOME_TP53_REGULATES_TRANSCRIPTION_OF_CELL_DEATH_GENES	REACTOME_TP53_REGULATES_TRANSCRIPTION_OF_CELL_DEATH_GENES		8	-0.402094	-1.37828	0.126531	0.917361	1	776	tags=88%, list=48%, signal=166%
REACTOME_BINDING_AND_UPTAKE_OF_LIGANDS_BY_SCAVENGER_RECEPTORS	REACTOME_BINDING_AND_UPTAKE_OF_LIGANDS_BY_SCAVENGER_RECEPTORS		9	0.375847	1.38177	0.127083	0.853974	1	1021	tags=100%, list=63%, signal=266%
REACTOME_INTERFERON_ALPHA_BETA_SIGNALING	REACTOME_INTERFERON_ALPHA_BETA_SIGNALING		7	0.427077	1.34948	0.130719	0.867358	1	937	tags=100%, list=57%, signal=234%
REACTOME_METALLOPROTEASE_DUBS	REACTOME_METALLOPROTEASE_DUBS		6	0.4508	1.36949	0.131631	0.839125	1	354	tags=67%, list=22%, signal=85%
REACTOME_VISUAL_PHOTOTRANSDUCTION	REACTOME_VISUAL_PHOTOTRANSDUCTION		5	-0.4874	-1.35558	0.134146	0.963578	1	840	tags=100%, list=51%, signal=205%
REACTOME_ANTIGEN_PROCESSING_UBIQUITINATION_PROTEASOME_DEGRADATION	REACTOME_ANTIGEN_PROCESSING_UBIQUITINATION_PROTEASOME_DEGRADATION		37	0.185377	1.34528	0.135827	0.866994	1	1203	tags=92%, list=74%, signal=342%
REACTOME_REGULATION_OF_PTEN_GENE_TRANSCRIPTION	REACTOME_REGULATION_OF_PTEN_GENE_TRANSCRIPTION		5	0.470313	1.3242	0.136	0.836679	1	213	tags=60%, list=13%, signal=69%
REACTOME_PARASITE_INFECTION	REACTOME_PARASITE_INFECTION		14	-0.299929	-1.33404	0.137736	1	1	798	tags=79%, list=49%, signal=152%
REACTOME_OXIDATIVE_STRESS_INDUCED_SENESCENCE	REACTOME_OXIDATIVE_STRESS_INDUCED_SENESCENCE		11	0.330155	1.32632	0.140787	0.854347	1	354	tags=55%, list=22%, signal=69%
REACTOME_SEMA4D_INDUCED_CELL_MIGRATION_AND_GROWTH_CONE_COLLAPSE	REACTOME_SEMA4D_INDUCED_CELL_MIGRATION_AND_GROWTH_CONE_COLLAPSE		6	-0.429889	-1.30113	0.142857	1	1	662	tags=83%, list=41%, signal=140%
REACTOME_SRP_DEPENDENT_COTRANSLATIONAL_PROTEIN_TARGETING_TO_MEMBRANE	REACTOME_SRP_DEPENDENT_COTRANSLATIONAL_PROTEIN_TARGETING_TO_MEMBRANE		51	0.159393	1.31658	0.143418	0.815742	1	1379	tags=100%, list=84%, signal=625%
REACTOME_PLATELET_ACTIVATION_SIGNALING_AND_AGGREGATION	REACTOME_PLATELET_ACTIVATION_SIGNALING_AND_AGGREGATION		23	0.234442	1.33647	0.144841	0.858509	1	899	tags=78%, list=55%, signal=172%
REACTOME_METABOLISM_OF_NUCLEOTIDES	REACTOME_METABOLISM_OF_NUCLEOTIDES		17	0.272446	1.3433	0.145098	0.848229	1	327	tags=47%, list=20%, signal=58%
REACTOME_RIPK1_MEDIATED_REGULATED_NECROSIS	REACTOME_RIPK1_MEDIATED_REGULATED_NECROSIS		8	0.376232	1.30514	0.145455	0.820385	1	816	tags=88%, list=50%, signal=174%
REACTOME_PHASE_I_FUNCTIONALIZATION_OF_COMPOUNDS	REACTOME_PHASE_I_FUNCTIONALIZATION_OF_COMPOUNDS		6	0.439729	1.32425	0.145914	0.848403	1	372	tags=67%, list=23%, signal=86%
REACTOME_METABOLISM_OF_AMINO_ACIDS_AND_DERIVATIVES	REACTOME_METABOLISM_OF_AMINO_ACIDS_AND_DERIVATIVES		71	0.131985	1.3161	0.14741	0.806461	1	1379	tags=97%, list=84%, signal=600%
REACTOME_DOWNREGULATION_OF_TGF_BETA_RECEPTOR_SIGNALING	REACTOME_DOWNREGULATION_OF_TGF_BETA_RECEPTOR_SIGNALING		9	0.364551	1.32769	0.149068	0.862246	1	858	tags=89%, list=53%, signal=186%
REACTOME_SELENOAMINO_ACID_METABOLISM	REACTOME_SELENOAMINO_ACID_METABOLISM		51	0.159393	1.33264	0.149712	0.858526	1	1379	tags=100%, list=84%, signal=625%
REACTOME_ANTIVIRAL_MECHANISM_BY_IFN_STIMULATED_GENES	REACTOME_ANTIVIRAL_MECHANISM_BY_IFN_STIMULATED_GENES		16	0.279703	1.32055	0.15251	0.836512	1	1179	tags=100%, list=72%, signal=357%
REACTOME_METABOLISM_OF_VITAMINS_AND_COFACTORS	REACTOME_METABOLISM_OF_VITAMINS_AND_COFACTORS		24	-0.228234	-1.32067	0.15275	1	1	858	tags=75%, list=53%, signal=156%
REACTOME_INFLUENZA_INFECTION	REACTOME_INFLUENZA_INFECTION		60	0.143003	1.28528	0.154762	0.812026	1	1379	tags=98%, list=84%, signal=611%
REACTOME_CELL_CYCLE_MITOTIC	REACTOME_CELL_CYCLE_MITOTIC		77	0.132225	1.3139	0.154902	0.802885	1	1383	tags=97%, list=85%, signal=608%
REACTOME_EXTRACELLULAR_MATRIX_ORGANIZATION	REACTOME_EXTRACELLULAR_MATRIX_ORGANIZATION		22	0.228402	1.30436	0.158898	0.812631	1	744	tags=68%, list=46%, signal=124%
REACTOME_EPH_EPHRIN_MEDIATED_REPULSION_OF_CELLS	REACTOME_EPH_EPHRIN_MEDIATED_REPULSION_OF_CELLS		7	0.401143	1.30247	0.16047	0.798246	1	746	tags=86%, list=46%, signal=157%
REACTOME_RUNX1_REGULATES_GENES_INVOLVED_IN_MEGAKARYOCYTE_DIFFERENTIATION_AND_PLATELET_FUNCTION	REACTOME_RUNX1_REGULATES_GENES_INVOLVED_IN_MEGAKARYOCYTE_DIFFERENTIATION_AND_PLATELET_FUNCTION		7	0.39622	1.30431	0.162524	0.802633	1	754	tags=86%, list=46%, signal=159%
REACTOME_INTERLEUKIN_1_FAMILY_SIGNALING	REACTOME_INTERLEUKIN_1_FAMILY_SIGNALING		14	0.279357	1.29254	0.163673	0.799971	1	1179	tags=100%, list=72%, signal=357%
REACTOME_PEPTIDE_HORMONE_METABOLISM	REACTOME_PEPTIDE_HORMONE_METABOLISM		5	-0.466011	-1.27844	0.166667	0.969509	1	222	tags=60%, list=14%, signal=69%
REACTOME_RHOH_GTPASE_CYCLE	REACTOME_RHOH_GTPASE_CYCLE		5	-0.46724	-1.29811	0.169625	0.994844	1	220	tags=60%, list=13%, signal=69%
REACTOME_NUCLEOBASE_CATABOLISM	REACTOME_NUCLEOBASE_CATABOLISM		5	0.474616	1.31902	0.169935	0.830415	1	206	tags=60%, list=13%, signal=68%
REACTOME_FCGAMMA_RECEPTOR_FCGR_DEPENDENT_PHAGOCYTOSIS	REACTOME_FCGAMMA_RECEPTOR_FCGR_DEPENDENT_PHAGOCYTOSIS		16	-0.264233	-1.2807	0.172065	1	1	798	tags=75%, list=49%, signal=145%
REACTOME_HDACS_DEACETYLATE_HISTONES	REACTOME_HDACS_DEACETYLATE_HISTONES		11	0.330155	1.31679	0.173737	0.82596	1	354	tags=55%, list=22%, signal=69%
REACTOME_IMMUNOREGULATORY_INTERACTIONS_BETWEEN_A_LYMPHOID_AND_A_NON_LYMPHOID_CELL	REACTOME_IMMUNOREGULATORY_INTERACTIONS_BETWEEN_A_LYMPHOID_AND_A_NON_LYMPHOID_CELL		5	0.463798	1.29972	0.173913	0.796705	1	550	tags=80%, list=34%, signal=120%
REACTOME_COPI_DEPENDENT_GOLGI_TO_ER_RETROGRADE_TRAFFIC	REACTOME_COPI_DEPENDENT_GOLGI_TO_ER_RETROGRADE_TRAFFIC		13	-0.296384	-1.29938	0.175097	1	1	651	tags=69%, list=40%, signal=114%
REACTOME_MET_ACTIVATES_PTK2_SIGNALING	REACTOME_MET_ACTIVATES_PTK2_SIGNALING		6	0.422509	1.25485	0.177734	0.841309	1	672	tags=83%, list=41%, signal=141%
REACTOME_COOPERATION_OF_PREFOLDIN_AND_TRIC_CCT_IN_ACTIN_AND_TUBULIN_FOLDING	REACTOME_COOPERATION_OF_PREFOLDIN_AND_TRIC_CCT_IN_ACTIN_AND_TUBULIN_FOLDING		12	0.309259	1.29731	0.178988	0.794475	1	450	tags=58%, list=28%, signal=80%
REACTOME_EUKARYOTIC_TRANSLATION_ELONGATION	REACTOME_EUKARYOTIC_TRANSLATION_ELONGATION		48	0.159091	1.28356	0.180077	0.807716	1	1379	tags=100%, list=84%, signal=626%
REACTOME_HOST_INTERACTIONS_OF_HIV_FACTORS	REACTOME_HOST_INTERACTIONS_OF_HIV_FACTORS		21	0.236499	1.283	0.182171	0.799909	1	1250	tags=100%, list=77%, signal=422%
REACTOME_ECM_PROTEOGLYCANS	REACTOME_ECM_PROTEOGLYCANS		7	0.386901	1.25103	0.182556	0.835122	1	536	tags=71%, list=33%, signal=106%
REACTOME_INTERACTIONS_OF_REV_WITH_HOST_CELLULAR_PROTEINS	REACTOME_INTERACTIONS_OF_REV_WITH_HOST_CELLULAR_PROTEINS		9	0.341754	1.27031	0.183365	0.820626	1	895	tags=89%, list=55%, signal=196%
REACTOME_INSULIN_PROCESSING	REACTOME_INSULIN_PROCESSING		5	-0.466011	-1.28069	0.184615	0.992457	1	222	tags=60%, list=14%, signal=69%
REACTOME_AMYLOID_FIBER_FORMATION	REACTOME_AMYLOID_FIBER_FORMATION		11	0.319724	1.26178	0.184762	0.837856	1	816	tags=82%, list=50%, signal=163%
REACTOME_RESPONSE_OF_EIF2AK4_GCN2_TO_AMINO_ACID_DEFICIENCY	REACTOME_RESPONSE_OF_EIF2AK4_GCN2_TO_AMINO_ACID_DEFICIENCY		47	0.158991	1.28195	0.187377	0.794328	1	1379	tags=100%, list=84%, signal=626%
REACTOME_IRE1ALPHA_ACTIVATES_CHAPERONES	REACTOME_IRE1ALPHA_ACTIVATES_CHAPERONES		17	0.245201	1.22666	0.189135	0.85768	1	851	tags=76%, list=52%, signal=158%
REACTOME_NUCLEAR_IMPORT_OF_REV_PROTEIN	REACTOME_NUCLEAR_IMPORT_OF_REV_PROTEIN		9	0.341754	1.24852	0.194274	0.833351	1	895	tags=89%, list=55%, signal=196%
REACTOME_SCAVENGING_BY_CLASS_A_RECEPTORS	REACTOME_SCAVENGING_BY_CLASS_A_RECEPTORS		7	0.386901	1.25751	0.197292	0.842204	1	536	tags=71%, list=33%, signal=106%
REACTOME_CELLULAR_RESPONSE_TO_HYPOXIA	REACTOME_CELLULAR_RESPONSE_TO_HYPOXIA		13	0.279185	1.24576	0.199195	0.824542	1	1179	tags=100%, list=72%, signal=357%
REACTOME_AMINO_ACIDS_REGULATE_MTORC1	REACTOME_AMINO_ACIDS_REGULATE_MTORC1		7	-0.379077	-1.23709	0.199597	1	1	1017	tags=100%, list=62%, signal=264%
REACTOME_ASSEMBLY_OF_COLLAGEN_FIBRILS_AND_OTHER_MULTIMERIC_STRUCTURES	REACTOME_ASSEMBLY_OF_COLLAGEN_FIBRILS_AND_OTHER_MULTIMERIC_STRUCTURES		6	0.422509	1.24648	0.2	0.83091	1	672	tags=83%, list=41%, signal=141%
REACTOME_PERK_REGULATES_GENE_EXPRESSION	REACTOME_PERK_REGULATES_GENE_EXPRESSION		7	0.373802	1.21409	0.205589	0.870128	1	91	tags=43%, list=6%, signal=45%
REACTOME_PROTEIN_UBIQUITINATION	REACTOME_PROTEIN_UBIQUITINATION		15	0.267409	1.23546	0.210191	0.839194	1	437	tags=53%, list=27%, signal=72%
REACTOME_RECRUITMENT_OF_NUMA_TO_MITOTIC_CENTROSOMES	REACTOME_RECRUITMENT_OF_NUMA_TO_MITOTIC_CENTROSOMES		15	-0.26778	-1.2407	0.210634	1	1	656	tags=67%, list=40%, signal=110%
REACTOME_MEIOTIC_SYNAPSIS	REACTOME_MEIOTIC_SYNAPSIS		6	0.413284	1.25384	0.21124	0.835365	1	415	tags=67%, list=25%, signal=89%
REACTOME_CELLULAR_RESPONSE_TO_STARVATION	REACTOME_CELLULAR_RESPONSE_TO_STARVATION		54	0.141318	1.21824	0.214876	0.873788	1	1408	tags=100%, list=86%, signal=704%
REACTOME_CELL_CYCLE	REACTOME_CELL_CYCLE		88	0.112577	1.2141	0.215116	0.878521	1	1383	tags=95%, list=85%, signal=592%
REACTOME_RNA_POLYMERASE_II_TRANSCRIPTION	REACTOME_RNA_POLYMERASE_II_TRANSCRIPTION		127	0.091888	1.17878	0.22	0.90657	1	1210	tags=83%, list=74%, signal=295%
REACTOME_SIGNALING_BY_MET	REACTOME_SIGNALING_BY_MET		17	0.245201	1.20852	0.220408	0.87864	1	851	tags=76%, list=52%, signal=158%
REACTOME_SIGNALING_BY_VEGF	REACTOME_SIGNALING_BY_VEGF		14	-0.264436	-1.19996	0.221532	1	1	972	tags=86%, list=60%, signal=210%
REACTOME_TRANSPORT_OF_INORGANIC_CATIONS_ANIONS_AND_AMINO_ACIDS_OLIGOPEPTIDES	REACTOME_TRANSPORT_OF_INORGANIC_CATIONS_ANIONS_AND_AMINO_ACIDS_OLIGOPEPTIDES		9	-0.33169	-1.21116	0.221569	1	1	188	tags=44%, list=12%, signal=50%
REACTOME_RHO_GTPASE_CYCLE	REACTOME_RHO_GTPASE_CYCLE		61	-0.13504	-1.21043	0.223577	1	1	752	tags=59%, list=46%, signal=105%
REACTOME_PYRUVATE_METABOLISM_AND_CITRIC_ACID_TCA_CYCLE	REACTOME_PYRUVATE_METABOLISM_AND_CITRIC_ACID_TCA_CYCLE		13	-0.276667	-1.22072	0.226263	1	1	934	tags=85%, list=57%, signal=196%
REACTOME_INTERLEUKIN_12_SIGNALING	REACTOME_INTERLEUKIN_12_SIGNALING		11	-0.29073	-1.19458	0.226908	1	1	865	tags=82%, list=53%, signal=173%
REACTOME_CLATHRIN_MEDIATED_ENDOCYTOSIS	REACTOME_CLATHRIN_MEDIATED_ENDOCYTOSIS		23	0.220256	1.23553	0.229126	0.847333	1	638	tags=61%, list=39%, signal=99%
REACTOME_RHOBTB2_GTPASE_CYCLE	REACTOME_RHOBTB2_GTPASE_CYCLE		7	0.367912	1.20674	0.230769	0.876025	1	800	tags=86%, list=49%, signal=167%
REACTOME_PLASMA_LIPOPROTEIN_CLEARANCE	REACTOME_PLASMA_LIPOPROTEIN_CLEARANCE		7	0.37222	1.20044	0.232604	0.887545	1	793	tags=86%, list=49%, signal=166%
REACTOME_RESPIRATORY_ELECTRON_TRANSPORT_ATP_SYNTHESIS_BY_CHEMIOSMOTIC_COUPLING_AND_HEAT_PRODUCTION_BY_UNCOUPLING_PROTEINS	REACTOME_RESPIRATORY_ELECTRON_TRANSPORT_ATP_SYNTHESIS_BY_CHEMIOSMOTIC_COUPLING_AND_HEAT_PRODUCTION_BY_UNCOUPLING_PROTEINS		29	-0.189967	-1.20058	0.234733	1	1	822	tags=69%, list=50%, signal=136%
REACTOME_RNA_POLYMERASE_I_TRANSCRIPTION	REACTOME_RNA_POLYMERASE_I_TRANSCRIPTION		12	0.284568	1.18662	0.235887	0.889687	1	354	tags=50%, list=22%, signal=63%
REACTOME_PTEN_REGULATION	REACTOME_PTEN_REGULATION		13	0.279185	1.19118	0.242105	0.891282	1	1179	tags=100%, list=72%, signal=357%
REACTOME_HIV_INFECTION	REACTOME_HIV_INFECTION		33	0.176417	1.19797	0.242424	0.878361	1	1250	tags=94%, list=77%, signal=393%
REACTOME_TRANSCRIPTIONAL_REGULATION_BY_SMALL_RNAS	REACTOME_TRANSCRIPTIONAL_REGULATION_BY_SMALL_RNAS		12	0.284568	1.1884	0.243461	0.891945	1	354	tags=50%, list=22%, signal=63%
REACTOME_RNA_POLYMERASE_I_TRANSCRIPTION_TERMINATION	REACTOME_RNA_POLYMERASE_I_TRANSCRIPTION_TERMINATION		5	-0.434911	-1.20243	0.250501	1	1	599	tags=80%, list=37%, signal=126%
REACTOME_ESTROGEN_DEPENDENT_GENE_EXPRESSION	REACTOME_ESTROGEN_DEPENDENT_GENE_EXPRESSION		12	0.284568	1.20042	0.250973	0.879417	1	354	tags=50%, list=22%, signal=63%
REACTOME_REGULATION_OF_TP53_ACTIVITY_THROUGH_METHYLATION	REACTOME_REGULATION_OF_TP53_ACTIVITY_THROUGH_METHYLATION		7	0.358066	1.15795	0.251938	0.907005	1	816	tags=86%, list=50%, signal=171%
REACTOME_STIMULI_SENSING_CHANNELS	REACTOME_STIMULI_SENSING_CHANNELS		10	-0.297657	-1.15158	0.253465	1	1	171	tags=40%, list=10%, signal=44%
REACTOME_UCH_PROTEINASES	REACTOME_UCH_PROTEINASES		12	0.279012	1.15829	0.253846	0.913609	1	1179	tags=100%, list=72%, signal=358%
REACTOME_RHO_GTPASES_ACTIVATE_FORMINS	REACTOME_RHO_GTPASES_ACTIVATE_FORMINS		22	-0.213552	-1.18463	0.253968	1	1	1215	tags=95%, list=74%, signal=369%
REACTOME_REGULATED_NECROSIS	REACTOME_REGULATED_NECROSIS		10	0.301233	1.16441	0.254	0.918099	1	816	tags=80%, list=50%, signal=159%
REACTOME_CRISTAE_FORMATION	REACTOME_CRISTAE_FORMATION		8	-0.343596	-1.16739	0.257937	1	1	1075	tags=100%, list=66%, signal=292%
REACTOME_RHOD_GTPASE_CYCLE	REACTOME_RHOD_GTPASE_CYCLE		6	-0.394219	-1.19422	0.2607	1	1	448	tags=67%, list=27%, signal=92%
REACTOME_APOPTOTIC_EXECUTION_PHASE	REACTOME_APOPTOTIC_EXECUTION_PHASE		9	0.319984	1.17175	0.261278	0.919555	1	749	tags=78%, list=46%, signal=143%
REACTOME_GENE_AND_PROTEIN_EXPRESSION_BY_JAK_STAT_SIGNALING_AFTER_INTERLEUKIN_12_STIMULATION	REACTOME_GENE_AND_PROTEIN_EXPRESSION_BY_JAK_STAT_SIGNALING_AFTER_INTERLEUKIN_12_STIMULATION		11	-0.29073	-1.15247	0.262525	1	1	865	tags=82%, list=53%, signal=173%
REACTOME_SIGNALING_BY_ERBB4	REACTOME_SIGNALING_BY_ERBB4		10	-0.28767	-1.14177	0.263374	1	1	840	tags=80%, list=51%, signal=164%
REACTOME_FCERI_MEDIATED_NF_KB_ACTIVATION	REACTOME_FCERI_MEDIATED_NF_KB_ACTIVATION		11	0.27884	1.15586	0.263581	0.906117	1	1179	tags=100%, list=72%, signal=358%
REACTOME_APOPTOTIC_CLEAVAGE_OF_CELLULAR_PROTEINS	REACTOME_APOPTOTIC_CLEAVAGE_OF_CELLULAR_PROTEINS		6	0.386224	1.15886	0.272165	0.919629	1	731	tags=83%, list=45%, signal=150%
REACTOME_DISEASES_OF_PROGRAMMED_CELL_DEATH	REACTOME_DISEASES_OF_PROGRAMMED_CELL_DEATH		9	0.328199	1.17019	0.273267	0.916593	1	917	tags=89%, list=56%, signal=202%
REACTOME_TRANSCRIPTIONAL_REGULATION_BY_RUNX1	REACTOME_TRANSCRIPTIONAL_REGULATION_BY_RUNX1		19	0.222632	1.14973	0.274029	0.91732	1	1186	tags=95%, list=73%, signal=343%
REACTOME_RESOLUTION_OF_ABASIC_SITES_AP_SITES	REACTOME_RESOLUTION_OF_ABASIC_SITES_AP_SITES		6	-0.375769	-1.13766	0.275281	0.997736	1	750	tags=83%, list=46%, signal=154%
REACTOME_APC_CDC20_MEDIATED_DEGRADATION_OF_NEK2A	REACTOME_APC_CDC20_MEDIATED_DEGRADATION_OF_NEK2A		7	0.358066	1.16051	0.276471	0.922138	1	816	tags=86%, list=50%, signal=171%
REACTOME_MITOCHONDRIAL_BIOGENESIS	REACTOME_MITOCHONDRIAL_BIOGENESIS		13	-0.26341	-1.16023	0.278106	1	1	1081	tags=92%, list=66%, signal=271%
REACTOME_TRANSPORT_OF_MATURE_MRNAS_DERIVED_FROM_INTRONLESS_TRANSCRIPTS	REACTOME_TRANSPORT_OF_MATURE_MRNAS_DERIVED_FROM_INTRONLESS_TRANSCRIPTS		8	0.329433	1.14195	0.279352	0.91177	1	1096	tags=100%, list=67%, signal=303%
REACTOME_L1CAM_INTERACTIONS	REACTOME_L1CAM_INTERACTIONS		13	0.2531	1.14175	0.280632	0.90514	1	468	tags=54%, list=29%, signal=75%
REACTOME_SIGNALING_BY_TGFB_FAMILY_MEMBERS	REACTOME_SIGNALING_BY_TGFB_FAMILY_MEMBERS		16	0.230198	1.13113	0.280702	0.887995	1	545	tags=56%, list=33%, signal=84%
REACTOME_SNRNP_ASSEMBLY	REACTOME_SNRNP_ASSEMBLY		12	0.267284	1.13307	0.281426	0.889115	1	1198	tags=100%, list=73%, signal=373%
REACTOME_DISORDERS_OF_TRANSMEMBRANE_TRANSPORTERS	REACTOME_DISORDERS_OF_TRANSMEMBRANE_TRANSPORTERS		18	0.223874	1.14525	0.281609	0.916258	1	1179	tags=94%, list=72%, signal=336%
REACTOME_TAK1_ACTIVATES_NFKB_BY_PHOSPHORYLATION_AND_ACTIVATION_OF_IKKS_COMPLEX	REACTOME_TAK1_ACTIVATES_NFKB_BY_PHOSPHORYLATION_AND_ACTIVATION_OF_IKKS_COMPLEX		7	0.358066	1.16811	0.282328	0.914986	1	816	tags=86%, list=50%, signal=171%
REACTOME_RHOJ_GTPASE_CYCLE	REACTOME_RHOJ_GTPASE_CYCLE		5	-0.410695	-1.15237	0.283019	1	1	312	tags=60%, list=19%, signal=74%
REACTOME_TP53_REGULATES_TRANSCRIPTION_OF_DNA_REPAIR_GENES	REACTOME_TP53_REGULATES_TRANSCRIPTION_OF_DNA_REPAIR_GENES		9	0.302321	1.12711	0.285433	0.886387	1	415	tags=56%, list=25%, signal=74%
REACTOME_ORGANELLE_BIOGENESIS_AND_MAINTENANCE	REACTOME_ORGANELLE_BIOGENESIS_AND_MAINTENANCE		40	-0.152387	-1.12732	0.291339	0.992723	1	656	tags=55%, list=40%, signal=90%
REACTOME_EXPORT_OF_VIRAL_RIBONUCLEOPROTEINS_FROM_NUCLEUS	REACTOME_EXPORT_OF_VIRAL_RIBONUCLEOPROTEINS_FROM_NUCLEUS		7	0.351033	1.12959	0.291667	0.885881	1	128	tags=43%, list=8%, signal=46%
REACTOME_FLT3_SIGNALING_IN_DISEASE	REACTOME_FLT3_SIGNALING_IN_DISEASE		8	-0.338054	-1.14826	0.291751	1	1	472	tags=63%, list=29%, signal=88%
REACTOME_PRC2_METHYLATES_HISTONES_AND_DNA	REACTOME_PRC2_METHYLATES_HISTONES_AND_DNA		5	0.410326	1.14718	0.294118	0.91758	1	637	tags=80%, list=39%, signal=131%
REACTOME_NS1_MEDIATED_EFFECTS_ON_HOST_PATHWAYS	REACTOME_NS1_MEDIATED_EFFECTS_ON_HOST_PATHWAYS		8	0.329433	1.13824	0.294845	0.908408	1	1096	tags=100%, list=67%, signal=303%
REACTOME_CIRCADIAN_CLOCK	REACTOME_CIRCADIAN_CLOCK		11	0.28658	1.13628	0.295499	0.900163	1	573	tags=64%, list=35%, signal=97%
REACTOME_SWITCHING_OF_ORIGINS_TO_A_POST_REPLICATIVE_STATE	REACTOME_SWITCHING_OF_ORIGINS_TO_A_POST_REPLICATIVE_STATE		11	0.27884	1.12674	0.297959	0.881137	1	1179	tags=100%, list=72%, signal=358%
REACTOME_ATF6_ATF6_ALPHA_ACTIVATES_CHAPERONES	REACTOME_ATF6_ATF6_ALPHA_ACTIVATES_CHAPERONES		6	0.375769	1.13641	0.298174	0.906657	1	476	tags=67%, list=29%, signal=94%
REACTOME_SUMOYLATION_OF_RNA_BINDING_PROTEINS	REACTOME_SUMOYLATION_OF_RNA_BINDING_PROTEINS		7	0.351033	1.1439	0.299389	0.913191	1	128	tags=43%, list=8%, signal=46%
REACTOME_TRNA_PROCESSING	REACTOME_TRNA_PROCESSING		14	0.238213	1.10641	0.300971	0.887957	1	1129	tags=93%, list=69%, signal=299%
REACTOME_G_ALPHA_Q_SIGNALLING_EVENTS	REACTOME_G_ALPHA_Q_SIGNALLING_EVENTS		7	-0.342154	-1.11178	0.30426	1	1	1077	tags=100%, list=66%, signal=293%
REACTOME_NONSENSE_MEDIATED_DECAY_NMD	REACTOME_NONSENSE_MEDIATED_DECAY_NMD		49	0.138152	1.11581	0.304802	0.886404	1	1379	tags=98%, list=84%, signal=613%
REACTOME_OVARIAN_TUMOR_DOMAIN_PROTEASES	REACTOME_OVARIAN_TUMOR_DOMAIN_PROTEASES		8	0.320197	1.11636	0.305019	0.891189	1	499	tags=63%, list=31%, signal=90%
REACTOME_DEPOSITION_OF_NEW_CENPA_CONTAINING_NUCLEOSOMES_AT_THE_CENTROMERE	REACTOME_DEPOSITION_OF_NEW_CENPA_CONTAINING_NUCLEOSOMES_AT_THE_CENTROMERE		5	0.391887	1.10926	0.305927	0.892269	1	667	tags=80%, list=41%, signal=135%
REACTOME_ATF6_ATF6_ALPHA_ACTIVATES_CHAPERONE_GENES	REACTOME_ATF6_ATF6_ALPHA_ACTIVATES_CHAPERONE_GENES		6	0.375769	1.13518	0.306667	0.89677	1	476	tags=67%, list=29%, signal=94%
REACTOME_METABOLISM_OF_WATER_SOLUBLE_VITAMINS_AND_COFACTORS	REACTOME_METABOLISM_OF_WATER_SOLUBLE_VITAMINS_AND_COFACTORS		18	-0.223461	-1.13625	0.309615	0.983069	1	1091	tags=89%, list=67%, signal=265%
REACTOME_SUMOYLATION_OF_CHROMATIN_ORGANIZATION_PROTEINS	REACTOME_SUMOYLATION_OF_CHROMATIN_ORGANIZATION_PROTEINS		7	0.351033	1.11932	0.309917	0.889169	1	128	tags=43%, list=8%, signal=46%
REACTOME_ABC_FAMILY_PROTEINS_MEDIATED_TRANSPORT	REACTOME_ABC_FAMILY_PROTEINS_MEDIATED_TRANSPORT		11	0.27884	1.10585	0.31619	0.88337	1	1179	tags=100%, list=72%, signal=358%
REACTOME_INTERLEUKIN_1_SIGNALING	REACTOME_INTERLEUKIN_1_SIGNALING		11	0.27884	1.12111	0.316832	0.890293	1	1179	tags=100%, list=72%, signal=358%
REACTOME_PROCESSING_OF_CAPPED_INTRON_CONTAINING_PRE_MRNA	REACTOME_PROCESSING_OF_CAPPED_INTRON_CONTAINING_PRE_MRNA		52	0.133009	1.13378	0.317526	0.893802	1	1107	tags=81%, list=68%, signal=243%
REACTOME_AURKA_ACTIVATION_BY_TPX2	REACTOME_AURKA_ACTIVATION_BY_TPX2		14	-0.243599	-1.10999	0.321285	0.992969	1	656	tags=64%, list=40%, signal=107%
REACTOME_DOWNREGULATION_OF_ERBB2_SIGNALING	REACTOME_DOWNREGULATION_OF_ERBB2_SIGNALING		5	0.390412	1.101	0.322134	0.872816	1	343	tags=60%, list=21%, signal=76%
REACTOME_CELL_CYCLE_CHECKPOINTS	REACTOME_CELL_CYCLE_CHECKPOINTS		36	0.155388	1.10064	0.322449	0.868047	1	1383	tags=100%, list=85%, signal=641%
REACTOME_LAMININ_INTERACTIONS	REACTOME_LAMININ_INTERACTIONS		5	0.388814	1.09212	0.325301	0.867668	1	672	tags=80%, list=41%, signal=136%
REACTOME_LYSOSOME_VESICLE_BIOGENESIS	REACTOME_LYSOSOME_VESICLE_BIOGENESIS		5	0.409711	1.10781	0.326087	0.890198	1	638	tags=80%, list=39%, signal=131%
REACTOME_ACTIVATED_NOTCH1_TRANSMITS_SIGNAL_TO_THE_NUCLEUS	REACTOME_ACTIVATED_NOTCH1_TRANSMITS_SIGNAL_TO_THE_NUCLEUS		5	0.390412	1.09079	0.327345	0.866016	1	343	tags=60%, list=21%, signal=76%
REACTOME_TRNA_MODIFICATION_IN_THE_NUCLEUS_AND_CYTOSOL	REACTOME_TRNA_MODIFICATION_IN_THE_NUCLEUS_AND_CYTOSOL		7	-0.342769	-1.11743	0.330882	1	1	1076	tags=100%, list=66%, signal=292%
REACTOME_FANCONI_ANEMIA_PATHWAY	REACTOME_FANCONI_ANEMIA_PATHWAY		9	0.302321	1.1132	0.33125	0.887765	1	415	tags=56%, list=25%, signal=74%
REACTOME_ASPARAGINE_N_LINKED_GLYCOSYLATION	REACTOME_ASPARAGINE_N_LINKED_GLYCOSYLATION		44	0.144092	1.10106	0.332661	0.878466	1	512	tags=45%, list=31%, signal=64%
REACTOME_VESICLE_MEDIATED_TRANSPORT	REACTOME_VESICLE_MEDIATED_TRANSPORT		94	0.100075	1.10282	0.333992	0.885534	1	1425	tags=97%, list=87%, signal=719%
REACTOME_TNFR2_NON_CANONICAL_NF_KB_PATHWAY	REACTOME_TNFR2_NON_CANONICAL_NF_KB_PATHWAY		10	0.278668	1.09246	0.335283	0.872411	1	1179	tags=100%, list=72%, signal=358%
REACTOME_TNF_SIGNALING	REACTOME_TNF_SIGNALING		12	0.259259	1.10201	0.335953	0.881617	1	1211	tags=100%, list=74%, signal=385%
REACTOME_CELL_CELL_COMMUNICATION	REACTOME_CELL_CELL_COMMUNICATION		7	0.341539	1.09675	0.337017	0.872712	1	1076	tags=100%, list=66%, signal=292%
REACTOME_TRANSCRIPTIONAL_REGULATION_BY_TP53	REACTOME_TRANSCRIPTIONAL_REGULATION_BY_TP53		53	0.130116	1.0847	0.337143	0.866616	1	1210	tags=87%, list=74%, signal=325%
REACTOME_RMTS_METHYLATE_HISTONE_ARGININES	REACTOME_RMTS_METHYLATE_HISTONE_ARGININES		6	0.376999	1.09509	0.339147	0.871209	1	1018	tags=100%, list=62%, signal=265%
REACTOME_G1_S_DNA_DAMAGE_CHECKPOINTS	REACTOME_G1_S_DNA_DAMAGE_CHECKPOINTS		10	0.278668	1.08302	0.339147	0.866006	1	1179	tags=100%, list=72%, signal=358%
REACTOME_MITOTIC_METAPHASE_AND_ANAPHASE	REACTOME_MITOTIC_METAPHASE_AND_ANAPHASE		34	0.155194	1.08099	0.341603	0.866263	1	1383	tags=100%, list=85%, signal=642%
REACTOME_SENSORY_PERCEPTION	REACTOME_SENSORY_PERCEPTION		15	-0.22919	-1.07344	0.342155	1	1	936	tags=80%, list=57%, signal=186%
REACTOME_CYTOSOLIC_SENSORS_OF_PATHOGEN_ASSOCIATED_DNA	REACTOME_CYTOSOLIC_SENSORS_OF_PATHOGEN_ASSOCIATED_DNA		16	0.220297	1.07443	0.342685	0.868843	1	1071	tags=88%, list=66%, signal=252%
REACTOME_REGULATION_OF_TP53_ACTIVITY_THROUGH_PHOSPHORYLATION	REACTOME_REGULATION_OF_TP53_ACTIVITY_THROUGH_PHOSPHORYLATION		19	0.207753	1.06337	0.342742	0.8619	1	1210	tags=95%, list=74%, signal=362%
REACTOME_REGULATION_OF_TNFR1_SIGNALING	REACTOME_REGULATION_OF_TNFR1_SIGNALING		11	0.259099	1.06003	0.345924	0.856118	1	1211	tags=100%, list=74%, signal=385%
REACTOME_S_PHASE	REACTOME_S_PHASE		17	0.220433	1.07751	0.346154	0.871067	1	1179	tags=94%, list=72%, signal=336%
REACTOME_TRANS_GOLGI_NETWORK_VESICLE_BUDDING	REACTOME_TRANS_GOLGI_NETWORK_VESICLE_BUDDING		7	0.336967	1.07738	0.350195	0.86613	1	384	tags=57%, list=24%, signal=74%
REACTOME_ANTIGEN_PROCESSING_CROSS_PRESENTATION	REACTOME_ANTIGEN_PROCESSING_CROSS_PRESENTATION		12	-0.251852	-1.05333	0.350598	1	1	817	tags=75%, list=50%, signal=149%
REACTOME_RECRUITMENT_OF_MITOTIC_CENTROSOME_PROTEINS_AND_COMPLEXES	REACTOME_RECRUITMENT_OF_MITOTIC_CENTROSOME_PROTEINS_AND_COMPLEXES		16	-0.225866	-1.08024	0.352475	1	1	656	tags=63%, list=40%, signal=103%
REACTOME_SPHINGOLIPID_METABOLISM	REACTOME_SPHINGOLIPID_METABOLISM		9	-0.297186	-1.07763	0.354	1	1	788	tags=78%, list=48%, signal=150%
REACTOME_NOTCH2_ACTIVATION_AND_TRANSMISSION_OF_SIGNAL_TO_THE_NUCLEUS	REACTOME_NOTCH2_ACTIVATION_AND_TRANSMISSION_OF_SIGNAL_TO_THE_NUCLEUS		5	0.390412	1.08695	0.354125	0.865861	1	343	tags=60%, list=21%, signal=76%
REACTOME_G2_M_DNA_DAMAGE_CHECKPOINT	REACTOME_G2_M_DNA_DAMAGE_CHECKPOINT		10	0.27053	1.04689	0.359184	0.861772	1	213	tags=40%, list=13%, signal=46%
REACTOME_DEGRADATION_OF_BETA_CATENIN_BY_THE_DESTRUCTION_COMPLEX	REACTOME_DEGRADATION_OF_BETA_CATENIN_BY_THE_DESTRUCTION_COMPLEX		9	-0.279318	-1.03933	0.361111	1	1	817	tags=78%, list=50%, signal=155%
REACTOME_GAMMA_CARBOXYLATION_HYPUSINE_FORMATION_AND_ARYLSULFATASE_ACTIVATION	REACTOME_GAMMA_CARBOXYLATION_HYPUSINE_FORMATION_AND_ARYLSULFATASE_ACTIVATION		7	0.326681	1.0873	0.361328	0.870451	1	867	tags=86%, list=53%, signal=182%
REACTOME_DECTIN_1_MEDIATED_NONCANONICAL_NF_KB_SIGNALING	REACTOME_DECTIN_1_MEDIATED_NONCANONICAL_NF_KB_SIGNALING		9	0.278497	1.04357	0.361493	0.860839	1	1179	tags=100%, list=72%, signal=358%
REACTOME_TP53_REGULATES_METABOLIC_GENES	REACTOME_TP53_REGULATES_METABOLIC_GENES		14	0.234505	1.07154	0.361616	0.860799	1	1135	tags=93%, list=70%, signal=302%
REACTOME_GOLGI_TO_ER_RETROGRADE_TRANSPORT	REACTOME_GOLGI_TO_ER_RETROGRADE_TRANSPORT		20	-0.204218	-1.07708	0.364	1	1	651	tags=60%, list=40%, signal=99%
REACTOME_CELL_JUNCTION_ORGANIZATION	REACTOME_CELL_JUNCTION_ORGANIZATION		6	0.341328	1.04934	0.364185	0.86479	1	1076	tags=100%, list=66%, signal=292%
REACTOME_INTERLEUKIN_12_FAMILY_SIGNALING	REACTOME_INTERLEUKIN_12_FAMILY_SIGNALING		13	-0.241745	-1.06546	0.364892	1	1	865	tags=77%, list=53%, signal=162%
REACTOME_CLEC7A_DECTIN_1_SIGNALING	REACTOME_CLEC7A_DECTIN_1_SIGNALING		17	0.220433	1.06359	0.36553	0.866293	1	1179	tags=94%, list=72%, signal=336%
REACTOME_RECOGNITION_AND_ASSOCIATION_OF_DNA_GLYCOSYLASE_WITH_SITE_CONTAINING_AN_AFFECTED_PURINE	REACTOME_RECOGNITION_AND_ASSOCIATION_OF_DNA_GLYCOSYLASE_WITH_SITE_CONTAINING_AN_AFFECTED_PURINE		5	0.383651	1.07203	0.366197	0.869833	1	354	tags=60%, list=22%, signal=76%
REACTOME_GAP_JUNCTION_TRAFFICKING_AND_REGULATION	REACTOME_GAP_JUNCTION_TRAFFICKING_AND_REGULATION		8	0.310961	1.07084	0.36811	0.85744	1	718	tags=75%, list=44%, signal=133%
REACTOME_SIGNALING_BY_INTERLEUKINS	REACTOME_SIGNALING_BY_INTERLEUKINS		49	0.12874	1.07194	0.369141	0.864903	1	861	tags=65%, list=53%, signal=134%
REACTOME_JOSEPHIN_DOMAIN_DUBS	REACTOME_JOSEPHIN_DOMAIN_DUBS		5	0.390412	1.06569	0.371717	0.865721	1	343	tags=60%, list=21%, signal=76%
REACTOME_TRANSMISSION_ACROSS_CHEMICAL_SYNAPSES	REACTOME_TRANSMISSION_ACROSS_CHEMICAL_SYNAPSES		12	-0.249383	-1.05364	0.374	1	1	277	tags=42%, list=17%, signal=50%
REACTOME_PHOSPHOLIPID_METABOLISM	REACTOME_PHOSPHOLIPID_METABOLISM		19	-0.207688	-1.05128	0.378	1	1	1298	tags=100%, list=80%, signal=483%
REACTOME_HIV_TRANSCRIPTION_ELONGATION	REACTOME_HIV_TRANSCRIPTION_ELONGATION		6	0.344403	1.03402	0.378906	0.851847	1	255	tags=50%, list=16%, signal=59%
REACTOME_TRANSCRIPTIONAL_REGULATION_BY_RUNX3	REACTOME_TRANSCRIPTIONAL_REGULATION_BY_RUNX3		12	-0.251852	-1.0501	0.379167	1	1	817	tags=75%, list=50%, signal=149%
REACTOME_ACTIVATION_OF_THE_MRNA_UPON_BINDING_OF_THE_CAP_BINDING_COMPLEX_AND_EIFS_AND_SUBSEQUENT_BINDING_TO_43S	REACTOME_ACTIVATION_OF_THE_MRNA_UPON_BINDING_OF_THE_CAP_BINDING_COMPLEX_AND_EIFS_AND_SUBSEQUENT_BINDING_TO_43S		31	0.161451	1.05037	0.380368	0.866777	1	1004	tags=77%, list=62%, signal=197%
REACTOME_MAP3K8_TPL2_DEPENDENT_MAPK1_3_ACTIVATION	REACTOME_MAP3K8_TPL2_DEPENDENT_MAPK1_3_ACTIVATION		6	0.333948	1.04254	0.38171	0.858717	1	816	tags=83%, list=50%, signal=166%
REACTOME_RHO_GTPASES_ACTIVATE_WASPS_AND_WAVES	REACTOME_RHO_GTPASES_ACTIVATE_WASPS_AND_WAVES		9	-0.291025	-1.0556	0.382664	1	1	798	tags=78%, list=49%, signal=151%
REACTOME_TRANSPORT_OF_THE_SLBP_DEPENDANT_MATURE_MRNA	REACTOME_TRANSPORT_OF_THE_SLBP_DEPENDANT_MATURE_MRNA		7	0.329231	1.05445	0.383721	0.865614	1	1096	tags=100%, list=67%, signal=303%
REACTOME_MEIOSIS	REACTOME_MEIOSIS		7	0.31789	1.03248	0.383858	0.851207	1	415	tags=57%, list=25%, signal=76%
REACTOME_MEIOTIC_RECOMBINATION	REACTOME_MEIOTIC_RECOMBINATION		5	0.383651	1.04813	0.383984	0.863163	1	354	tags=60%, list=22%, signal=76%
REACTOME_SIGNALING_BY_NOTCH1_HD_DOMAIN_MUTANTS_IN_CANCER	REACTOME_SIGNALING_BY_NOTCH1_HD_DOMAIN_MUTANTS_IN_CANCER		5	0.390412	1.06015	0.385396	0.860774	1	343	tags=60%, list=21%, signal=76%
REACTOME_CARGO_TRAFFICKING_TO_THE_PERICILIARY_MEMBRANE	REACTOME_CARGO_TRAFFICKING_TO_THE_PERICILIARY_MEMBRANE		7	0.325187	1.04624	0.386973	0.858725	1	170	tags=43%, list=10%, signal=48%
REACTOME_GENE_SILENCING_BY_RNA	REACTOME_GENE_SILENCING_BY_RNA		13	0.245973	1.06262	0.389222	0.858873	1	354	tags=46%, list=22%, signal=58%
REACTOME_STABILIZATION_OF_P53	REACTOME_STABILIZATION_OF_P53		9	0.278497	1.03565	0.389362	0.866217	1	1179	tags=100%, list=72%, signal=358%
REACTOME_RECYCLING_PATHWAY_OF_L1	REACTOME_RECYCLING_PATHWAY_OF_L1		8	0.293719	1.02203	0.389433	0.84225	1	746	tags=75%, list=46%, signal=137%
REACTOME_FORMATION_OF_TUBULIN_FOLDING_INTERMEDIATES_BY_CCT_TRIC	REACTOME_FORMATION_OF_TUBULIN_FOLDING_INTERMEDIATES_BY_CCT_TRIC		9	0.28856	1.03013	0.389558	0.84399	1	800	tags=78%, list=49%, signal=152%
REACTOME_CYTOSOLIC_TRNA_AMINOACYLATION	REACTOME_CYTOSOLIC_TRNA_AMINOACYLATION		11	0.254332	1.03008	0.389691	0.839784	1	922	tags=82%, list=56%, signal=187%
REACTOME_TOLL_LIKE_RECEPTOR_9_TLR9_CASCADE	REACTOME_TOLL_LIKE_RECEPTOR_9_TLR9_CASCADE		9	0.278702	1.03874	0.391304	0.863259	1	816	tags=78%, list=50%, signal=155%
REACTOME_P75NTR_SIGNALS_VIA_NF_KB	REACTOME_P75NTR_SIGNALS_VIA_NF_KB		6	0.333948	1.02029	0.392857	0.841884	1	816	tags=83%, list=50%, signal=166%
REACTOME_REGULATION_OF_RAS_BY_GAPS	REACTOME_REGULATION_OF_RAS_BY_GAPS		9	-0.279318	-1.04539	0.393075	1	1	817	tags=78%, list=50%, signal=155%
REACTOME_TGF_BETA_RECEPTOR_SIGNALING_ACTIVATES_SMADS	REACTOME_TGF_BETA_RECEPTOR_SIGNALING_ACTIVATES_SMADS		10	0.278668	1.05251	0.393411	0.865958	1	1179	tags=100%, list=72%, signal=358%
REACTOME_REPRODUCTION	REACTOME_REPRODUCTION		7	0.31789	1.0346	0.398773	0.854922	1	415	tags=57%, list=25%, signal=76%
REACTOME_TNFR1_INDUCED_NFKAPPAB_SIGNALING_PATHWAY	REACTOME_TNFR1_INDUCED_NFKAPPAB_SIGNALING_PATHWAY		11	0.259099	1.02496	0.40202	0.839363	1	1211	tags=100%, list=74%, signal=385%
REACTOME_LATE_ENDOSOMAL_MICROAUTOPHAGY	REACTOME_LATE_ENDOSOMAL_MICROAUTOPHAGY		8	0.29064	1.01845	0.403226	0.833859	1	343	tags=50%, list=21%, signal=63%
REACTOME_REGULATION_OF_GLUCOKINASE_BY_GLUCOKINASE_REGULATORY_PROTEIN	REACTOME_REGULATION_OF_GLUCOKINASE_BY_GLUCOKINASE_REGULATORY_PROTEIN		6	0.329028	1.01587	0.404669	0.831747	1	1096	tags=100%, list=67%, signal=303%
REACTOME_NERVOUS_SYSTEM_DEVELOPMENT	REACTOME_NERVOUS_SYSTEM_DEVELOPMENT		91	0.091713	1.01948	0.406061	0.835412	1	1400	tags=95%, list=86%, signal=628%
REACTOME_DNA_DOUBLE_STRAND_BREAK_REPAIR	REACTOME_DNA_DOUBLE_STRAND_BREAK_REPAIR		21	0.189944	1.02625	0.407258	0.844896	1	1325	tags=100%, list=81%, signal=525%
REACTOME_DNA_REPLICATION_PRE_INITIATION	REACTOME_DNA_REPLICATION_PRE_INITIATION		9	-0.279318	-1.02817	0.409369	1	1	817	tags=78%, list=50%, signal=155%
REACTOME_MEMBRANE_TRAFFICKING	REACTOME_MEMBRANE_TRAFFICKING		86	0.0964229	1.03505	0.410042	0.858462	1	1425	tags=97%, list=87%, signal=721%
REACTOME_CARGO_RECOGNITION_FOR_CLATHRIN_MEDIATED_ENDOCYTOSIS	REACTOME_CARGO_RECOGNITION_FOR_CLATHRIN_MEDIATED_ENDOCYTOSIS		17	0.20743	1.03018	0.411765	0.848263	1	816	tags=71%, list=50%, signal=140%
REACTOME_RNA_POLYMERASE_II_TRANSCRIPTION_TERMINATION	REACTOME_RNA_POLYMERASE_II_TRANSCRIPTION_TERMINATION		11	-0.252257	-1.00995	0.413386	1	1	779	tags=73%, list=48%, signal=138%
REACTOME_CLASS_I_MHC_MEDIATED_ANTIGEN_PROCESSING_PRESENTATION	REACTOME_CLASS_I_MHC_MEDIATED_ANTIGEN_PROCESSING_PRESENTATION		45	0.132577	1.03556	0.414683	0.86178	1	1203	tags=87%, list=74%, signal=321%
REACTOME_SUMOYLATION	REACTOME_SUMOYLATION		26	0.170993	1.01977	0.415133	0.83894	1	917	tags=73%, list=56%, signal=164%
REACTOME_INTEGRIN_CELL_SURFACE_INTERACTIONS	REACTOME_INTEGRIN_CELL_SURFACE_INTERACTIONS		6	0.338868	1.03227	0.416834	0.847196	1	536	tags=67%, list=33%, signal=99%
REACTOME_MRNA_SPLICING	REACTOME_MRNA_SPLICING		43	0.129305	0.998664	0.421569	0.853364	1	1046	tags=77%, list=64%, signal=208%
REACTOME_CYCLIN_A_CDK2_ASSOCIATED_EVENTS_AT_S_PHASE_ENTRY	REACTOME_CYCLIN_A_CDK2_ASSOCIATED_EVENTS_AT_S_PHASE_ENTRY		9	0.278497	1.02588	0.423529	0.841364	1	1179	tags=100%, list=72%, signal=358%
REACTOME_NEGATIVE_REGULATORS_OF_DDX58_IFIH1_SIGNALING	REACTOME_NEGATIVE_REGULATORS_OF_DDX58_IFIH1_SIGNALING		8	0.290025	0.994512	0.432866	0.839528	1	548	tags=63%, list=34%, signal=94%
REACTOME_DNA_REPAIR	REACTOME_DNA_REPAIR		43	0.127797	1.0041	0.433468	0.844391	1	555	tags=47%, list=34%, signal=69%
REACTOME_PEROXISOMAL_PROTEIN_IMPORT	REACTOME_PEROXISOMAL_PROTEIN_IMPORT		13	0.227918	0.994838	0.434874	0.842597	1	1262	tags=100%, list=77%, signal=438%
REACTOME_NF_KB_IS_ACTIVATED_AND_SIGNALS_SURVIVAL	REACTOME_NF_KB_IS_ACTIVATED_AND_SIGNALS_SURVIVAL		6	0.333948	1.00955	0.43513	0.843753	1	816	tags=83%, list=50%, signal=166%
REACTOME_TRANSLATION_OF_SARS_COV_2_STRUCTURAL_PROTEINS	REACTOME_TRANSLATION_OF_SARS_COV_2_STRUCTURAL_PROTEINS		8	0.29064	0.995137	0.436853	0.845906	1	343	tags=50%, list=21%, signal=63%
REACTOME_NICOTINATE_METABOLISM	REACTOME_NICOTINATE_METABOLISM		6	-0.333333	-0.995243	0.437126	1	1	1091	tags=100%, list=67%, signal=301%
REACTOME_NOD1_2_SIGNALING_PATHWAY	REACTOME_NOD1_2_SIGNALING_PATHWAY		6	0.333948	1.005	0.437262	0.846444	1	816	tags=83%, list=50%, signal=166%
REACTOME_ORC1_REMOVAL_FROM_CHROMATIN	REACTOME_ORC1_REMOVAL_FROM_CHROMATIN		9	0.278497	1.0181	0.437751	0.830468	1	1179	tags=100%, list=72%, signal=358%
REACTOME_SCF_SKP2_MEDIATED_DEGRADATION_OF_P27_P21	REACTOME_SCF_SKP2_MEDIATED_DEGRADATION_OF_P27_P21		9	0.278497	1.0088	0.438735	0.841351	1	1179	tags=100%, list=72%, signal=358%
REACTOME_REGULATION_OF_MRNA_STABILITY_BY_PROTEINS_THAT_BIND_AU_RICH_ELEMENTS	REACTOME_REGULATION_OF_MRNA_STABILITY_BY_PROTEINS_THAT_BIND_AU_RICH_ELEMENTS		15	0.212245	0.989822	0.442718	0.842489	1	1179	tags=93%, list=72%, signal=333%
REACTOME_HIV_LIFE_CYCLE	REACTOME_HIV_LIFE_CYCLE		24	0.166045	0.989641	0.443787	0.839115	1	1228	tags=92%, list=75%, signal=365%
REACTOME_SUMOYLATION_OF_UBIQUITINYLATION_PROTEINS	REACTOME_SUMOYLATION_OF_UBIQUITINYLATION_PROTEINS		6	0.329028	0.998572	0.445783	0.849516	1	1096	tags=100%, list=67%, signal=303%
REACTOME_AUF1_HNRNP_D0_BINDS_AND_DESTABILIZES_MRNA	REACTOME_AUF1_HNRNP_D0_BINDS_AND_DESTABILIZES_MRNA		9	0.278497	0.998328	0.448077	0.846039	1	1179	tags=100%, list=72%, signal=358%
REACTOME_POSITIVE_EPIGENETIC_REGULATION_OF_RRNA_EXPRESSION	REACTOME_POSITIVE_EPIGENETIC_REGULATION_OF_RRNA_EXPRESSION		15	0.215461	0.979615	0.449187	0.850978	1	521	tags=53%, list=32%, signal=78%
REACTOME_NCAM_SIGNALING_FOR_NEURITE_OUT_GROWTH	REACTOME_NCAM_SIGNALING_FOR_NEURITE_OUT_GROWTH		5	-0.348371	-0.982794	0.449597	1	1	87	tags=40%, list=5%, signal=42%
REACTOME_DISEASES_OF_SIGNAL_TRANSDUCTION_BY_GROWTH_FACTOR_RECEPTORS_AND_SECOND_MESSENGERS	REACTOME_DISEASES_OF_SIGNAL_TRANSDUCTION_BY_GROWTH_FACTOR_RECEPTORS_AND_SECOND_MESSENGERS		39	-0.1368	-0.993961	0.450207	1	1	620	tags=51%, list=38%, signal=81%
REACTOME_M_PHASE	REACTOME_M_PHASE		54	0.118857	0.995158	0.450787	0.849858	1	1383	tags=96%, list=85%, signal=610%
REACTOME_GLYCEROPHOSPHOLIPID_BIOSYNTHESIS	REACTOME_GLYCEROPHOSPHOLIPID_BIOSYNTHESIS		15	-0.207174	-0.975361	0.453252	1	1	1298	tags=100%, list=80%, signal=484%
REACTOME_RND2_GTPASE_CYCLE	REACTOME_RND2_GTPASE_CYCLE		7	-0.291604	-0.974328	0.45509	1	1	926	tags=86%, list=57%, signal=197%
REACTOME_ABC_TRANSPORTER_DISORDERS	REACTOME_ABC_TRANSPORTER_DISORDERS		8	0.278325	0.981447	0.461538	0.850603	1	1179	tags=100%, list=72%, signal=358%
REACTOME_MITOTIC_G2_G2_M_PHASES	REACTOME_MITOTIC_G2_G2_M_PHASES		35	0.136112	0.969565	0.463265	0.856142	1	1367	tags=97%, list=84%, signal=585%
REACTOME_NEGATIVE_REGULATION_OF_MAPK_PATHWAY	REACTOME_NEGATIVE_REGULATION_OF_MAPK_PATHWAY		9	0.269049	0.978863	0.464143	0.845546	1	469	tags=56%, list=29%, signal=78%
REACTOME_ASSEMBLY_OF_THE_PRE_REPLICATIVE_COMPLEX	REACTOME_ASSEMBLY_OF_THE_PRE_REPLICATIVE_COMPLEX		8	0.278325	0.964973	0.464876	0.848197	1	1179	tags=100%, list=72%, signal=358%
REACTOME_DNA_DAMAGE_BYPASS	REACTOME_DNA_DAMAGE_BYPASS		10	0.250925	0.976087	0.46507	0.848154	1	408	tags=50%, list=25%, signal=66%
REACTOME_MITOTIC_G1_PHASE_AND_G1_S_TRANSITION	REACTOME_MITOTIC_G1_PHASE_AND_G1_S_TRANSITION		21	-0.186042	-0.989995	0.466019	1	1	867	tags=71%, list=53%, signal=150%
REACTOME_DEADENYLATION_DEPENDENT_MRNA_DECAY	REACTOME_DEADENYLATION_DEPENDENT_MRNA_DECAY		9	0.25077	0.950525	0.467611	0.848422	1	680	tags=67%, list=42%, signal=114%
REACTOME_MTOR_SIGNALLING	REACTOME_MTOR_SIGNALLING		6	0.319803	0.981729	0.468172	0.853822	1	1111	tags=100%, list=68%, signal=312%
REACTOME_REGULATION_OF_HMOX1_EXPRESSION_AND_ACTIVITY	REACTOME_REGULATION_OF_HMOX1_EXPRESSION_AND_ACTIVITY		8	0.278325	0.965306	0.470588	0.854763	1	1179	tags=100%, list=72%, signal=358%
REACTOME_INACTIVATION_OF_CSF3_G_CSF_SIGNALING	REACTOME_INACTIVATION_OF_CSF3_G_CSF_SIGNALING		8	0.278325	0.965312	0.470707	0.858483	1	1179	tags=100%, list=72%, signal=358%
REACTOME_INTRAFLAGELLAR_TRANSPORT	REACTOME_INTRAFLAGELLAR_TRANSPORT		8	0.275862	0.970915	0.472727	0.856549	1	571	tags=63%, list=35%, signal=96%
REACTOME_CILIUM_ASSEMBLY	REACTOME_CILIUM_ASSEMBLY		27	-0.156802	-0.974089	0.473786	1	1	656	tags=56%, list=40%, signal=91%
REACTOME_REGULATION_OF_RUNX3_EXPRESSION_AND_ACTIVITY	REACTOME_REGULATION_OF_RUNX3_EXPRESSION_AND_ACTIVITY		8	0.278325	0.963978	0.47412	0.843334	1	1179	tags=100%, list=72%, signal=358%
REACTOME_AGGREPHAGY	REACTOME_AGGREPHAGY		10	0.251048	0.979362	0.474747	0.847828	1	571	tags=60%, list=35%, signal=92%
REACTOME_DNA_REPLICATION	REACTOME_DNA_REPLICATION		14	0.207311	0.964507	0.476744	0.845602	1	1179	tags=93%, list=72%, signal=332%
REACTOME_SEPARATION_OF_SISTER_CHROMATIDS	REACTOME_SEPARATION_OF_SISTER_CHROMATIDS		27	0.154517	0.961689	0.477495	0.837739	1	1383	tags=100%, list=85%, signal=645%
REACTOME_DDX58_IFIH1_MEDIATED_INDUCTION_OF_INTERFERON_ALPHA_BETA	REACTOME_DDX58_IFIH1_MEDIATED_INDUCTION_OF_INTERFERON_ALPHA_BETA		14	0.215522	0.963108	0.478261	0.841744	1	816	tags=71%, list=50%, signal=142%
REACTOME_DEGRADATION_OF_THE_EXTRACELLULAR_MATRIX	REACTOME_DEGRADATION_OF_THE_EXTRACELLULAR_MATRIX		9	0.26412	0.966782	0.479079	0.859028	1	1021	tags=89%, list=63%, signal=236%
REACTOME_FOLDING_OF_ACTIN_BY_CCT_TRIC	REACTOME_FOLDING_OF_ACTIN_BY_CCT_TRIC		8	0.271552	0.939602	0.480374	0.85908	1	170	tags=38%, list=10%, signal=42%
REACTOME_SENSORY_PROCESSING_OF_SOUND	REACTOME_SENSORY_PROCESSING_OF_SOUND		9	-0.263093	-0.973251	0.480469	1	1	662	tags=67%, list=41%, signal=112%
REACTOME_SUMOYLATION_OF_SUMOYLATION_PROTEINS	REACTOME_SUMOYLATION_OF_SUMOYLATION_PROTEINS		6	0.329028	0.993275	0.483403	0.838678	1	1096	tags=100%, list=67%, signal=303%
REACTOME_NOTCH3_ACTIVATION_AND_TRANSMISSION_OF_SIGNAL_TO_THE_NUCLEUS	REACTOME_NOTCH3_ACTIVATION_AND_TRANSMISSION_OF_SIGNAL_TO_THE_NUCLEUS		6	0.314883	0.955142	0.484615	0.845332	1	847	tags=83%, list=52%, signal=173%
REACTOME_RUNX1_REGULATES_TRANSCRIPTION_OF_GENES_INVOLVED_IN_DIFFERENTIATION_OF_HSCS	REACTOME_RUNX1_REGULATES_TRANSCRIPTION_OF_GENES_INVOLVED_IN_DIFFERENTIATION_OF_HSCS		11	0.238629	0.950109	0.486111	0.845924	1	354	tags=45%, list=22%, signal=58%
REACTOME_MHC_CLASS_II_ANTIGEN_PRESENTATION	REACTOME_MHC_CLASS_II_ANTIGEN_PRESENTATION		19	-0.182791	-0.954	0.487524	1	1	651	tags=58%, list=40%, signal=95%
REACTOME_FORMATION_OF_INCISION_COMPLEX_IN_GG_NER	REACTOME_FORMATION_OF_INCISION_COMPLEX_IN_GG_NER		5	0.350461	0.965089	0.495984	0.851546	1	408	tags=60%, list=25%, signal=80%
REACTOME_REGULATION_OF_PTEN_STABILITY_AND_ACTIVITY	REACTOME_REGULATION_OF_PTEN_STABILITY_AND_ACTIVITY		8	0.278325	0.959588	0.498032	0.838985	1	1179	tags=100%, list=72%, signal=358%
REACTOME_EXTENSION_OF_TELOMERES	REACTOME_EXTENSION_OF_TELOMERES		6	-0.317958	-0.965639	0.5	1	1	572	tags=67%, list=35%, signal=102%
REACTOME_SLC_TRANSPORTER_DISORDERS	REACTOME_SLC_TRANSPORTER_DISORDERS		10	0.252528	0.962514	0.5	0.839561	1	895	tags=80%, list=55%, signal=176%
REACTOME_METABOLISM_OF_LIPIDS	REACTOME_METABOLISM_OF_LIPIDS		62	-0.101315	-0.94779	0.504082	1	1	1316	tags=90%, list=81%, signal=449%
REACTOME_RAS_PROCESSING	REACTOME_RAS_PROCESSING		7	-0.295121	-0.953374	0.51004	1	1	454	tags=57%, list=28%, signal=79%
REACTOME_LEISHMANIA_INFECTION	REACTOME_LEISHMANIA_INFECTION		24	-0.155473	-0.93901	0.510163	1	1	839	tags=67%, list=51%, signal=135%
REACTOME_CLASS_A_1_RHODOPSIN_LIKE_RECEPTORS	REACTOME_CLASS_A_1_RHODOPSIN_LIKE_RECEPTORS		8	-0.264778	-0.942621	0.512621	1	1	387	tags=50%, list=24%, signal=65%
REACTOME_SYNTHESIS_OF_SUBSTRATES_IN_N_GLYCAN_BIOSYTHESIS	REACTOME_SYNTHESIS_OF_SUBSTRATES_IN_N_GLYCAN_BIOSYTHESIS		7	0.296967	0.950705	0.516327	0.851463	1	449	tags=57%, list=28%, signal=78%
REACTOME_TRANSPORT_OF_SMALL_MOLECULES	REACTOME_TRANSPORT_OF_SMALL_MOLECULES		57	0.105865	0.928145	0.517895	0.870049	1	863	tags=63%, list=53%, signal=129%
REACTOME_ACTIVATION_OF_GENE_EXPRESSION_BY_SREBF_SREBP	REACTOME_ACTIVATION_OF_GENE_EXPRESSION_BY_SREBF_SREBP		7	0.289055	0.947018	0.522244	0.845685	1	695	tags=71%, list=43%, signal=124%
REACTOME_ER_TO_GOLGI_ANTEROGRADE_TRANSPORT	REACTOME_ER_TO_GOLGI_ANTEROGRADE_TRANSPORT		26	-0.156001	-0.934264	0.522772	1	1	692	tags=58%, list=42%, signal=99%
REACTOME_NON_INTEGRIN_MEMBRANE_ECM_INTERACTIONS	REACTOME_NON_INTEGRIN_MEMBRANE_ECM_INTERACTIONS		9	0.255699	0.934951	0.523422	0.862189	1	672	tags=67%, list=41%, signal=113%
REACTOME_SUMOYLATION_OF_DNA_DAMAGE_RESPONSE_AND_REPAIR_PROTEINS	REACTOME_SUMOYLATION_OF_DNA_DAMAGE_RESPONSE_AND_REPAIR_PROTEINS		10	0.238964	0.937345	0.524462	0.860514	1	917	tags=80%, list=56%, signal=181%
REACTOME_TCF_DEPENDENT_SIGNALING_IN_RESPONSE_TO_WNT	REACTOME_TCF_DEPENDENT_SIGNALING_IN_RESPONSE_TO_WNT		18	-0.189178	-0.931338	0.524851	1	1	693	tags=61%, list=42%, signal=105%
REACTOME_SIGNALING_BY_PTK6	REACTOME_SIGNALING_BY_PTK6		13	0.211479	0.909752	0.525458	0.879876	1	912	tags=77%, list=56%, signal=173%
REACTOME_ONCOGENE_INDUCED_SENESCENCE	REACTOME_ONCOGENE_INDUCED_SENESCENCE		8	0.274015	0.948135	0.527835	0.846875	1	1186	tags=100%, list=73%, signal=364%
REACTOME_CYCLIN_D_ASSOCIATED_EVENTS_IN_G1	REACTOME_CYCLIN_D_ASSOCIATED_EVENTS_IN_G1		9	-0.248511	-0.920658	0.528846	1	1	867	tags=78%, list=53%, signal=165%
REACTOME_ION_CHANNEL_TRANSPORT	REACTOME_ION_CHANNEL_TRANSPORT		13	-0.213047	-0.925618	0.529058	1	1	1037	tags=85%, list=64%, signal=230%
REACTOME_DEGRADATION_OF_GLI1_BY_THE_PROTEASOME	REACTOME_DEGRADATION_OF_GLI1_BY_THE_PROTEASOME		7	0.278154	0.906235	0.53012	0.873935	1	1179	tags=100%, list=72%, signal=359%
REACTOME_POSTMITOTIC_NUCLEAR_PORE_COMPLEX_NPC_REFORMATION	REACTOME_POSTMITOTIC_NUCLEAR_PORE_COMPLEX_NPC_REFORMATION		5	0.328826	0.924729	0.531792	0.863747	1	1096	tags=100%, list=67%, signal=304%
REACTOME_PROTEIN_LOCALIZATION	REACTOME_PROTEIN_LOCALIZATION		26	0.154229	0.922122	0.532	0.865874	1	1195	tags=88%, list=73%, signal=325%
REACTOME_DETOXIFICATION_OF_REACTIVE_OXYGEN_SPECIES	REACTOME_DETOXIFICATION_OF_REACTIVE_OXYGEN_SPECIES		6	0.306273	0.907929	0.533981	0.877059	1	861	tags=83%, list=53%, signal=176%
REACTOME_REGULATION_OF_CHOLESTEROL_BIOSYNTHESIS_BY_SREBP_SREBF	REACTOME_REGULATION_OF_CHOLESTEROL_BIOSYNTHESIS_BY_SREBP_SREBF		10	0.241924	0.929979	0.537549	0.86949	1	749	tags=70%, list=46%, signal=129%
REACTOME_SIGNALING_BY_PDGF	REACTOME_SIGNALING_BY_PDGF		7	-0.286154	-0.931891	0.53816	1	1	1168	tags=100%, list=72%, signal=350%
REACTOME_NUCLEAR_EVENTS_KINASE_AND_TRANSCRIPTION_FACTOR_ACTIVATION	REACTOME_NUCLEAR_EVENTS_KINASE_AND_TRANSCRIPTION_FACTOR_ACTIVATION		7	-0.286593	-0.925155	0.538618	1	1	701	tags=71%, list=43%, signal=125%
REACTOME_HIV_ELONGATION_ARREST_AND_RECOVERY	REACTOME_HIV_ELONGATION_ARREST_AND_RECOVERY		7	0.272879	0.893209	0.540161	0.865946	1	255	tags=43%, list=16%, signal=51%
REACTOME_RHOQ_GTPASE_CYCLE	REACTOME_RHOQ_GTPASE_CYCLE		6	-0.310578	-0.912949	0.54065	1	1	312	tags=50%, list=19%, signal=62%
REACTOME_TRANSLOCATION_OF_SLC2A4_GLUT4_TO_THE_PLASMA_MEMBRANE	REACTOME_TRANSLOCATION_OF_SLC2A4_GLUT4_TO_THE_PLASMA_MEMBRANE		13	-0.212049	-0.923371	0.540856	1	1	662	tags=62%, list=41%, signal=103%
REACTOME_PROCESSING_OF_DNA_DOUBLE_STRAND_BREAK_ENDS	REACTOME_PROCESSING_OF_DNA_DOUBLE_STRAND_BREAK_ENDS		12	0.211111	0.909555	0.540918	0.876923	1	1289	tags=100%, list=79%, signal=472%
REACTOME_COOPERATION_OF_PDCL_PHLP1_AND_TRIC_CCT_IN_G_PROTEIN_BETA_FOLDING	REACTOME_COOPERATION_OF_PDCL_PHLP1_AND_TRIC_CCT_IN_G_PROTEIN_BETA_FOLDING		8	0.271552	0.927825	0.542574	0.867141	1	170	tags=38%, list=10%, signal=42%
REACTOME_DNA_DAMAGE_RECOGNITION_IN_GG_NER	REACTOME_DNA_DAMAGE_RECOGNITION_IN_GG_NER		11	0.228198	0.926216	0.543137	0.863953	1	816	tags=73%, list=50%, signal=144%
REACTOME_C_TYPE_LECTIN_RECEPTORS_CLRS	REACTOME_C_TYPE_LECTIN_RECEPTORS_CLRS		19	0.176265	0.9024	0.545802	0.862517	1	1089	tags=84%, list=67%, signal=250%
REACTOME_INTERCONVERSION_OF_NUCLEOTIDE_DI_AND_TRIPHOSPHATES	REACTOME_INTERCONVERSION_OF_NUCLEOTIDE_DI_AND_TRIPHOSPHATES		6	0.300123	0.905954	0.546351	0.871219	1	327	tags=50%, list=20%, signal=62%
REACTOME_DNA_DAMAGE_TELOMERE_STRESS_INDUCED_SENESCENCE	REACTOME_DNA_DAMAGE_TELOMERE_STRESS_INDUCED_SENESCENCE		9	0.258164	0.926995	0.546778	0.865599	1	668	tags=67%, list=41%, signal=112%
REACTOME_FORMATION_OF_RNA_POL_II_ELONGATION_COMPLEX	REACTOME_FORMATION_OF_RNA_POL_II_ELONGATION_COMPLEX		9	0.252208	0.920428	0.548515	0.866181	1	315	tags=44%, list=19%, signal=55%
REACTOME_DEFECTIVE_CFTR_CAUSES_CYSTIC_FIBROSIS	REACTOME_DEFECTIVE_CFTR_CAUSES_CYSTIC_FIBROSIS		7	0.278154	0.904002	0.549696	0.86893	1	1179	tags=100%, list=72%, signal=359%
REACTOME_FOXO_MEDIATED_TRANSCRIPTION	REACTOME_FOXO_MEDIATED_TRANSCRIPTION		6	0.296433	0.910668	0.552268	0.884462	1	1149	tags=100%, list=70%, signal=337%
REACTOME_DISEASES_OF_METABOLISM	REACTOME_DISEASES_OF_METABOLISM		21	-0.163341	-0.912888	0.553191	1	1	515	tags=48%, list=32%, signal=69%
REACTOME_RESPIRATORY_ELECTRON_TRANSPORT	REACTOME_RESPIRATORY_ELECTRON_TRANSPORT		23	-0.161132	-0.905167	0.555556	1	1	948	tags=74%, list=58%, signal=174%
REACTOME_DEGRADATION_OF_AXIN	REACTOME_DEGRADATION_OF_AXIN		7	0.278154	0.905658	0.55625	0.868636	1	1179	tags=100%, list=72%, signal=359%
REACTOME_ASYMMETRIC_LOCALIZATION_OF_PCP_PROTEINS	REACTOME_ASYMMETRIC_LOCALIZATION_OF_PCP_PROTEINS		7	0.278154	0.895513	0.559289	0.86431	1	1179	tags=100%, list=72%, signal=359%
REACTOME_TRNA_AMINOACYLATION	REACTOME_TRNA_AMINOACYLATION		13	0.205302	0.883059	0.56654	0.864849	1	922	tags=77%, list=56%, signal=175%
REACTOME_HCMV_EARLY_EVENTS	REACTOME_HCMV_EARLY_EVENTS		18	0.176786	0.903931	0.567901	0.865784	1	983	tags=78%, list=60%, signal=193%
REACTOME_INFECTION_WITH_MYCOBACTERIUM_TUBERCULOSIS	REACTOME_INFECTION_WITH_MYCOBACTERIUM_TUBERCULOSIS		7	0.278154	0.90992	0.568182	0.882868	1	1179	tags=100%, list=72%, signal=359%
REACTOME_NEGATIVE_REGULATION_OF_NOTCH4_SIGNALING	REACTOME_NEGATIVE_REGULATION_OF_NOTCH4_SIGNALING		7	0.278154	0.902225	0.571429	0.859739	1	1179	tags=100%, list=72%, signal=359%
REACTOME_NEURONAL_SYSTEM	REACTOME_NEURONAL_SYSTEM		16	0.178837	0.888423	0.575342	0.869496	1	628	tags=56%, list=38%, signal=91%
REACTOME_GOLGI_ASSOCIATED_VESICLE_BIOGENESIS	REACTOME_GOLGI_ASSOCIATED_VESICLE_BIOGENESIS		6	0.293973	0.903415	0.580078	0.863566	1	337	tags=50%, list=21%, signal=63%
REACTOME_MITOCHONDRIAL_TRANSLATION	REACTOME_MITOCHONDRIAL_TRANSLATION		30	0.139576	0.899883	0.582822	0.86134	1	1353	tags=97%, list=83%, signal=555%
REACTOME_HOMOLOGY_DIRECTED_REPAIR	REACTOME_HOMOLOGY_DIRECTED_REPAIR		15	0.189239	0.897703	0.583673	0.862802	1	1325	tags=100%, list=81%, signal=527%
REACTOME_RESPONSE_OF_MTB_TO_PHAGOCYTOSIS	REACTOME_RESPONSE_OF_MTB_TO_PHAGOCYTOSIS		7	0.278154	0.907338	0.586408	0.87496	1	1179	tags=100%, list=72%, signal=359%
REACTOME_DEGRADATION_OF_DVL	REACTOME_DEGRADATION_OF_DVL		7	0.278154	0.883835	0.58658	0.866458	1	1179	tags=100%, list=72%, signal=359%
REACTOME_REGULATION_OF_INSULIN_SECRETION	REACTOME_REGULATION_OF_INSULIN_SECRETION		5	-0.329809	-0.901389	0.588353	1	1	770	tags=80%, list=47%, signal=151%
REACTOME_SIGNALING_BY_FGFR3	REACTOME_SIGNALING_BY_FGFR3		8	-0.251232	-0.875551	0.588679	1	1	817	tags=75%, list=50%, signal=149%
REACTOME_DUAL_INCISION_IN_GG_NER	REACTOME_DUAL_INCISION_IN_GG_NER		8	0.250616	0.889608	0.590643	0.870286	1	408	tags=50%, list=25%, signal=66%
REACTOME_INTRA_GOLGI_AND_RETROGRADE_GOLGI_TO_ER_TRAFFIC	REACTOME_INTRA_GOLGI_AND_RETROGRADE_GOLGI_TO_ER_TRAFFIC		30	0.138577	0.88179	0.591633	0.858437	1	1409	tags=100%, list=86%, signal=718%
REACTOME_CALNEXIN_CALRETICULIN_CYCLE	REACTOME_CALNEXIN_CALRETICULIN_CYCLE		6	0.290283	0.886078	0.592369	0.86809	1	343	tags=50%, list=21%, signal=63%
REACTOME_HEDGEHOG_LIGAND_BIOGENESIS	REACTOME_HEDGEHOG_LIGAND_BIOGENESIS		8	-0.251232	-0.871398	0.593688	1	1	817	tags=75%, list=50%, signal=149%
REACTOME_HEMOSTASIS	REACTOME_HEMOSTASIS		47	0.111873	0.882852	0.59375	0.859199	1	1037	tags=74%, list=64%, signal=198%
REACTOME_RNA_POLYMERASE_II_TRANSCRIBES_SNRNA_GENES	REACTOME_RNA_POLYMERASE_II_TRANSCRIBES_SNRNA_GENES		12	0.214815	0.883046	0.594378	0.86178	1	331	tags=42%, list=20%, signal=52%
REACTOME_SIGNALING_BY_SCF_KIT	REACTOME_SIGNALING_BY_SCF_KIT		5	-0.312354	-0.869448	0.594545	1	1	472	tags=60%, list=29%, signal=84%
REACTOME_NOTCH1_INTRACELLULAR_DOMAIN_REGULATES_TRANSCRIPTION	REACTOME_NOTCH1_INTRACELLULAR_DOMAIN_REGULATES_TRANSCRIPTION		9	-0.246252	-0.871174	0.595238	1	1	508	tags=56%, list=31%, signal=80%
REACTOME_CARGO_CONCENTRATION_IN_THE_ER	REACTOME_CARGO_CONCENTRATION_IN_THE_ER		5	0.312231	0.887112	0.597137	0.869331	1	1123	tags=100%, list=69%, signal=320%
REACTOME_SUMOYLATION_OF_DNA_REPLICATION_PROTEINS	REACTOME_SUMOYLATION_OF_DNA_REPLICATION_PROTEINS		10	0.229223	0.884936	0.597222	0.867241	1	1096	tags=90%, list=67%, signal=272%
REACTOME_SIGNALING_BY_FGFR4	REACTOME_SIGNALING_BY_FGFR4		8	-0.251232	-0.870224	0.599581	1	1	817	tags=75%, list=50%, signal=149%
REACTOME_REGULATION_OF_TP53_ACTIVITY	REACTOME_REGULATION_OF_TP53_ACTIVITY		26	0.146374	0.879148	0.604463	0.860993	1	831	tags=65%, list=51%, signal=131%
REACTOME_PROTEIN_FOLDING	REACTOME_PROTEIN_FOLDING		20	0.1634	0.866046	0.605263	0.865868	1	470	tags=45%, list=29%, signal=62%
REACTOME_COPII_MEDIATED_VESICLE_TRANSPORT	REACTOME_COPII_MEDIATED_VESICLE_TRANSPORT		9	-0.244609	-0.887481	0.60835	1	1	692	tags=67%, list=42%, signal=115%
REACTOME_FORMATION_OF_THE_BETA_CATENIN_TCF_TRANSACTIVATING_COMPLEX	REACTOME_FORMATION_OF_THE_BETA_CATENIN_TCF_TRANSACTIVATING_COMPLEX		6	0.283518	0.866034	0.609148	0.862918	1	354	tags=50%, list=22%, signal=64%
REACTOME_SIGNALING_BY_EGFR	REACTOME_SIGNALING_BY_EGFR		8	-0.251232	-0.881462	0.610672	1	1	817	tags=75%, list=50%, signal=149%
REACTOME_ASSEMBLY_OF_THE_HIV_VIRION	REACTOME_ASSEMBLY_OF_THE_HIV_VIRION		5	0.300307	0.867826	0.61144	0.865588	1	816	tags=80%, list=50%, signal=160%
REACTOME_RECOGNITION_OF_DNA_DAMAGE_BY_PCNA_CONTAINING_REPLICATION_COMPLEX	REACTOME_RECOGNITION_OF_DNA_DAMAGE_BY_PCNA_CONTAINING_REPLICATION_COMPLEX		8	0.250616	0.852075	0.613936	0.878234	1	408	tags=50%, list=25%, signal=66%
REACTOME_HCMV_INFECTION	REACTOME_HCMV_INFECTION		22	0.157764	0.870844	0.614907	0.862827	1	1377	tags=100%, list=84%, signal=631%
REACTOME_NR1H2_AND_NR1H3_MEDIATED_SIGNALING	REACTOME_NR1H2_AND_NR1H3_MEDIATED_SIGNALING		5	0.314444	0.877005	0.615694	0.859431	1	793	tags=80%, list=49%, signal=155%
REACTOME_SIGNALING_BY_NOTCH2	REACTOME_SIGNALING_BY_NOTCH2		6	0.290283	0.874077	0.618661	0.859302	1	343	tags=50%, list=21%, signal=63%
REACTOME_FC_EPSILON_RECEPTOR_FCERI_SIGNALING	REACTOME_FC_EPSILON_RECEPTOR_FCERI_SIGNALING		18	0.167699	0.875422	0.618952	0.859676	1	1179	tags=89%, list=72%, signal=317%
REACTOME_FORMATION_OF_TC_NER_PRE_INCISION_COMPLEX	REACTOME_FORMATION_OF_TC_NER_PRE_INCISION_COMPLEX		14	0.195656	0.863961	0.621951	0.863933	1	615	tags=57%, list=38%, signal=91%
REACTOME_ACTIVATION_OF_NMDA_RECEPTORS_AND_POSTSYNAPTIC_EVENTS	REACTOME_ACTIVATION_OF_NMDA_RECEPTORS_AND_POSTSYNAPTIC_EVENTS		6	0.284748	0.84582	0.623158	0.881474	1	624	tags=67%, list=38%, signal=108%
REACTOME_SIGNALING_BY_FGFR1	REACTOME_SIGNALING_BY_FGFR1		8	-0.251232	-0.849158	0.624278	1	1	817	tags=75%, list=50%, signal=149%
REACTOME_DOWNSTREAM_SIGNAL_TRANSDUCTION	REACTOME_DOWNSTREAM_SIGNAL_TRANSDUCTION		5	-0.312354	-0.873619	0.628803	1	1	472	tags=60%, list=29%, signal=84%
REACTOME_FATTY_ACID_METABOLISM	REACTOME_FATTY_ACID_METABOLISM		13	0.20383	0.878557	0.63	0.859122	1	1301	tags=100%, list=80%, signal=489%
REACTOME_HATS_ACETYLATE_HISTONES	REACTOME_HATS_ACETYLATE_HISTONES		8	0.246305	0.836692	0.633124	0.881639	1	1027	tags=88%, list=63%, signal=235%
REACTOME_TOLL_LIKE_RECEPTOR_CASCADES	REACTOME_TOLL_LIKE_RECEPTOR_CASCADES		13	0.193234	0.834564	0.633528	0.874292	1	816	tags=69%, list=50%, signal=137%
REACTOME_BASE_EXCISION_REPAIR_AP_SITE_FORMATION	REACTOME_BASE_EXCISION_REPAIR_AP_SITE_FORMATION		6	0.283518	0.861066	0.634766	0.866539	1	354	tags=50%, list=22%, signal=64%
REACTOME_TRANSCRIPTIONAL_REGULATION_BY_RUNX2	REACTOME_TRANSCRIPTIONAL_REGULATION_BY_RUNX2		13	-0.193852	-0.853338	0.636183	1	1	817	tags=69%, list=50%, signal=138%
REACTOME_TRANSLESION_SYNTHESIS_BY_Y_FAMILY_DNA_POLYMERASES_BYPASSES_LESIONS_ON_DNA_TEMPLATE	REACTOME_TRANSLESION_SYNTHESIS_BY_Y_FAMILY_DNA_POLYMERASES_BYPASSES_LESIONS_ON_DNA_TEMPLATE		9	0.234956	0.836231	0.637113	0.879705	1	343	tags=44%, list=21%, signal=56%
REACTOME_PLASMA_LIPOPROTEIN_ASSEMBLY_REMODELING_AND_CLEARANCE	REACTOME_PLASMA_LIPOPROTEIN_ASSEMBLY_REMODELING_AND_CLEARANCE		10	0.214797	0.840074	0.638	0.881185	1	793	tags=70%, list=49%, signal=135%
REACTOME_NEGATIVE_EPIGENETIC_REGULATION_OF_RRNA_EXPRESSION	REACTOME_NEGATIVE_EPIGENETIC_REGULATION_OF_RRNA_EXPRESSION		12	0.200617	0.860725	0.641129	0.86437	1	354	tags=42%, list=22%, signal=53%
REACTOME_SIGNALING_BY_FGFR2	REACTOME_SIGNALING_BY_FGFR2		10	-0.223798	-0.841048	0.641732	1	1	454	tags=50%, list=28%, signal=69%
REACTOME_TERMINATION_OF_TRANSLESION_DNA_SYNTHESIS	REACTOME_TERMINATION_OF_TRANSLESION_DNA_SYNTHESIS		9	0.234956	0.848617	0.645418	0.882028	1	343	tags=44%, list=21%, signal=56%
REACTOME_BIOLOGICAL_OXIDATIONS	REACTOME_BIOLOGICAL_OXIDATIONS		16	0.17203	0.835207	0.647295	0.878804	1	639	tags=56%, list=39%, signal=92%
REACTOME_E3_UBIQUITIN_LIGASES_UBIQUITINATE_TARGET_PROTEINS	REACTOME_E3_UBIQUITIN_LIGASES_UBIQUITINATE_TARGET_PROTEINS		13	0.194707	0.839419	0.647525	0.87946	1	437	tags=46%, list=27%, signal=63%
REACTOME_DOWNREGULATION_OF_SMAD2_3_SMAD4_TRANSCRIPTIONAL_ACTIVITY	REACTOME_DOWNREGULATION_OF_SMAD2_3_SMAD4_TRANSCRIPTIONAL_ACTIVITY		6	0.281673	0.84652	0.647658	0.883194	1	357	tags=50%, list=22%, signal=64%
REACTOME_SIGNALING_BY_FGFR	REACTOME_SIGNALING_BY_FGFR		10	-0.223798	-0.858662	0.648289	1	1	454	tags=50%, list=28%, signal=69%
REACTOME_DISEASES_OF_GLYCOSYLATION	REACTOME_DISEASES_OF_GLYCOSYLATION		5	0.307191	0.843229	0.651252	0.883646	1	152	tags=40%, list=9%, signal=44%
REACTOME_SIGNALING_BY_RHO_GTPASES_MIRO_GTPASES_AND_RHOBTB3	REACTOME_SIGNALING_BY_RHO_GTPASES_MIRO_GTPASES_AND_RHOBTB3		95	-0.0767798	-0.849331	0.651303	1	1	364	tags=29%, list=22%, signal=36%
REACTOME_G2_M_CHECKPOINTS	REACTOME_G2_M_CHECKPOINTS		19	0.16367	0.840411	0.656311	0.886297	1	1367	tags=100%, list=84%, signal=609%
REACTOME_GLOBAL_GENOME_NUCLEOTIDE_EXCISION_REPAIR_GG_NER	REACTOME_GLOBAL_GENOME_NUCLEOTIDE_EXCISION_REPAIR_GG_NER		14	0.189122	0.835032	0.65764	0.876303	1	1325	tags=100%, list=81%, signal=527%
REACTOME_TELOMERE_MAINTENANCE	REACTOME_TELOMERE_MAINTENANCE		12	0.200617	0.834006	0.663327	0.872488	1	354	tags=42%, list=22%, signal=53%
REACTOME_SUPPRESSION_OF_PHAGOSOMAL_MATURATION	REACTOME_SUPPRESSION_OF_PHAGOSOMAL_MATURATION		5	0.300307	0.840249	0.668067	0.883776	1	816	tags=80%, list=50%, signal=160%
REACTOME_APC_C_CDH1_MEDIATED_DEGRADATION_OF_CDC20_AND_OTHER_APC_C_CDH1_TARGETED_PROTEINS_IN_LATE_MITOSIS_EARLY_G1	REACTOME_APC_C_CDH1_MEDIATED_DEGRADATION_OF_CDC20_AND_OTHER_APC_C_CDH1_TARGETED_PROTEINS_IN_LATE_MITOSIS_EARLY_G1		12	0.195062	0.824537	0.675676	0.884168	1	1179	tags=92%, list=72%, signal=328%
REACTOME_SMOOTH_MUSCLE_CONTRACTION	REACTOME_SMOOTH_MUSCLE_CONTRACTION		5	0.291825	0.820192	0.677358	0.889545	1	177	tags=40%, list=11%, signal=45%
REACTOME_OPIOID_SIGNALLING	REACTOME_OPIOID_SIGNALLING		7	-0.243341	-0.812681	0.678846	1	1	305	tags=43%, list=19%, signal=52%
REACTOME_TRANSPORT_TO_THE_GOLGI_AND_SUBSEQUENT_MODIFICATION	REACTOME_TRANSPORT_TO_THE_GOLGI_AND_SUBSEQUENT_MODIFICATION		27	-0.134372	-0.82587	0.682093	1	1	692	tags=56%, list=42%, signal=95%
REACTOME_RNA_POLYMERASE_III_TRANSCRIPTION	REACTOME_RNA_POLYMERASE_III_TRANSCRIPTION		8	0.232143	0.810805	0.683168	0.90112	1	438	tags=50%, list=27%, signal=68%
REACTOME_SLC_MEDIATED_TRANSMEMBRANE_TRANSPORT	REACTOME_SLC_MEDIATED_TRANSMEMBRANE_TRANSPORT		18	-0.162536	-0.819612	0.685598	1	1	1008	tags=78%, list=62%, signal=201%
REACTOME_RNA_POLYMERASE_I_PROMOTER_ESCAPE	REACTOME_RNA_POLYMERASE_I_PROMOTER_ESCAPE		9	0.228178	0.831249	0.686275	0.874633	1	354	tags=44%, list=22%, signal=56%
REACTOME_THE_ROLE_OF_GTSE1_IN_G2_M_PROGRESSION_AFTER_G2_CHECKPOINT	REACTOME_THE_ROLE_OF_GTSE1_IN_G2_M_PROGRESSION_AFTER_G2_CHECKPOINT		15	-0.177613	-0.814707	0.686391	1	1	693	tags=60%, list=42%, signal=103%
REACTOME_RNA_POLYMERASE_III_TRANSCRIPTION_INITIATION_FROM_TYPE_1_PROMOTER	REACTOME_RNA_POLYMERASE_III_TRANSCRIPTION_INITIATION_FROM_TYPE_1_PROMOTER		8	0.232143	0.799975	0.694045	0.912126	1	438	tags=50%, list=27%, signal=68%
REACTOME_RESOLUTION_OF_SISTER_CHROMATID_COHESION	REACTOME_RESOLUTION_OF_SISTER_CHROMATID_COHESION		19	0.153751	0.80465	0.698444	0.909542	1	1383	tags=100%, list=85%, signal=648%
REACTOME_RAB_GEFS_EXCHANGE_GTP_FOR_GDP_ON_RABS	REACTOME_RAB_GEFS_EXCHANGE_GTP_FOR_GDP_ON_RABS		7	0.252484	0.819591	0.69877	0.887831	1	55	tags=29%, list=3%, signal=29%
REACTOME_NEUROTRANSMITTER_RECEPTORS_AND_POSTSYNAPTIC_SIGNAL_TRANSMISSION	REACTOME_NEUROTRANSMITTER_RECEPTORS_AND_POSTSYNAPTIC_SIGNAL_TRANSMISSION		9	-0.218731	-0.806071	0.699234	1	1	1278	tags=100%, list=78%, signal=458%
REACTOME_B_WICH_COMPLEX_POSITIVELY_REGULATES_RRNA_EXPRESSION	REACTOME_B_WICH_COMPLEX_POSITIVELY_REGULATES_RRNA_EXPRESSION		12	-0.192593	-0.801937	0.703093	1	1	641	tags=58%, list=39%, signal=95%
REACTOME_RNA_POLYMERASE_I_TRANSCRIPTION_INITIATION	REACTOME_RNA_POLYMERASE_I_TRANSCRIPTION_INITIATION		8	0.219212	0.788555	0.705394	0.904091	1	255	tags=38%, list=16%, signal=44%
REACTOME_BIOSYNTHESIS_OF_THE_N_GLYCAN_PRECURSOR_DOLICHOL_LIPID_LINKED_OLIGOSACCHARIDE_LLO_AND_TRANSFER_TO_A_NASCENT_PROTEIN	REACTOME_BIOSYNTHESIS_OF_THE_N_GLYCAN_PRECURSOR_DOLICHOL_LIPID_LINKED_OLIGOSACCHARIDE_LLO_AND_TRANSFER_TO_A_NASCENT_PROTEIN		8	0.225369	0.794629	0.706827	0.910241	1	449	tags=50%, list=28%, signal=69%
REACTOME_COMPLEX_I_BIOGENESIS	REACTOME_COMPLEX_I_BIOGENESIS		12	-0.189506	-0.798854	0.70751	1	1	918	tags=75%, list=56%, signal=170%
REACTOME_PEPTIDE_LIGAND_BINDING_RECEPTORS	REACTOME_PEPTIDE_LIGAND_BINDING_RECEPTORS		6	-0.264453	-0.800073	0.708249	1	1	387	tags=50%, list=24%, signal=65%
REACTOME_ADAPTIVE_IMMUNE_SYSTEM	REACTOME_ADAPTIVE_IMMUNE_SYSTEM		85	0.0762767	0.789869	0.712329	0.912944	1	1417	tags=94%, list=87%, signal=677%
REACTOME_RAF_ACTIVATION	REACTOME_RAF_ACTIVATION		5	0.278304	0.792472	0.712575	0.911141	1	199	tags=40%, list=12%, signal=45%
REACTOME_ONCOGENIC_MAPK_SIGNALING	REACTOME_ONCOGENIC_MAPK_SIGNALING		7	0.23789	0.803633	0.714008	0.908516	1	545	tags=57%, list=33%, signal=85%
REACTOME_MAPK_FAMILY_SIGNALING_CASCADES	REACTOME_MAPK_FAMILY_SIGNALING_CASCADES		29	-0.126788	-0.80732	0.714876	1	1	867	tags=66%, list=53%, signal=137%
REACTOME_TRANSCRIPTIONAL_ACTIVITY_OF_SMAD2_SMAD3_SMAD4_HETEROTRIMER	REACTOME_TRANSCRIPTIONAL_ACTIVITY_OF_SMAD2_SMAD3_SMAD4_HETEROTRIMER		8	-0.223522	-0.795262	0.715105	1	1	454	tags=50%, list=28%, signal=69%
REACTOME_REGULATION_OF_PLK1_ACTIVITY_AT_G2_M_TRANSITION	REACTOME_REGULATION_OF_PLK1_ACTIVITY_AT_G2_M_TRANSITION		22	-0.140486	-0.794442	0.715139	1	1	665	tags=55%, list=41%, signal=91%
REACTOME_GLYCOSAMINOGLYCAN_METABOLISM	REACTOME_GLYCOSAMINOGLYCAN_METABOLISM		7	-0.250637	-0.806169	0.715164	1	1	60	tags=29%, list=4%, signal=30%
REACTOME_N_GLYCAN_TRIMMING_IN_THE_ER_AND_CALNEXIN_CALRETICULIN_CYCLE	REACTOME_N_GLYCAN_TRIMMING_IN_THE_ER_AND_CALNEXIN_CALRETICULIN_CYCLE		8	0.230911	0.797998	0.717132	0.909988	1	1256	tags=100%, list=77%, signal=432%
REACTOME_PTK6_REGULATES_RTKS_AND_THEIR_EFFECTORS_AKT1_AND_DOK1	REACTOME_PTK6_REGULATES_RTKS_AND_THEIR_EFFECTORS_AKT1_AND_DOK1		5	0.277812	0.770926	0.717132	0.912124	1	1179	tags=100%, list=72%, signal=359%
REACTOME_KINESINS	REACTOME_KINESINS		6	-0.269373	-0.799745	0.718563	1	1	651	tags=67%, list=40%, signal=110%
REACTOME_CONDENSATION_OF_PROPHASE_CHROMOSOMES	REACTOME_CONDENSATION_OF_PROPHASE_CHROMOSOMES		8	0.229064	0.798293	0.719536	0.912333	1	443	tags=50%, list=27%, signal=68%
REACTOME_TRNA_PROCESSING_IN_THE_NUCLEUS	REACTOME_TRNA_PROCESSING_IN_THE_NUCLEUS		7	0.235692	0.774936	0.720559	0.910725	1	1248	tags=100%, list=76%, signal=423%
REACTOME_RHOBTB_GTPASE_CYCLE	REACTOME_RHOBTB_GTPASE_CYCLE		11	0.198643	0.78892	0.720792	0.906224	1	1309	tags=100%, list=80%, signal=502%
REACTOME_TOLL_LIKE_RECEPTOR_TLR1_TLR2_CASCADE	REACTOME_TOLL_LIKE_RECEPTOR_TLR1_TLR2_CASCADE		10	0.200617	0.776746	0.727455	0.910535	1	816	tags=70%, list=50%, signal=139%
REACTOME_PLATELET_AGGREGATION_PLUG_FORMATION	REACTOME_PLATELET_AGGREGATION_PLUG_FORMATION		5	0.278795	0.789289	0.731076	0.908406	1	851	tags=80%, list=52%, signal=167%
REACTOME_TRANSCRIPTION_COUPLED_NUCLEOTIDE_EXCISION_REPAIR_TC_NER	REACTOME_TRANSCRIPTION_COUPLED_NUCLEOTIDE_EXCISION_REPAIR_TC_NER		17	0.15356	0.781112	0.73374	0.913853	1	615	tags=53%, list=38%, signal=84%
REACTOME_SEMAPHORIN_INTERACTIONS	REACTOME_SEMAPHORIN_INTERACTIONS		12	0.187654	0.789511	0.733981	0.910711	1	239	tags=33%, list=15%, signal=39%
REACTOME_NEDDYLATION	REACTOME_NEDDYLATION		32	0.115625	0.7953	0.737154	0.911868	1	1089	tags=78%, list=67%, signal=230%
REACTOME_MITOTIC_PROMETAPHASE	REACTOME_MITOTIC_PROMETAPHASE		29	0.123518	0.779179	0.737903	0.914491	1	1433	tags=100%, list=88%, signal=806%
REACTOME_COPI_MEDIATED_ANTEROGRADE_TRANSPORT	REACTOME_COPI_MEDIATED_ANTEROGRADE_TRANSPORT		18	0.152416	0.778375	0.739919	0.910502	1	1385	tags=100%, list=85%, signal=653%
REACTOME_SIGNALING_BY_NOTCH4	REACTOME_SIGNALING_BY_NOTCH4		10	-0.201233	-0.774064	0.740443	1	1	817	tags=70%, list=50%, signal=139%
REACTOME_SEMA4D_IN_SEMAPHORIN_SIGNALING	REACTOME_SEMA4D_IN_SEMAPHORIN_SIGNALING		8	-0.221059	-0.782426	0.743137	1	1	662	tags=63%, list=41%, signal=105%
REACTOME_COPI_INDEPENDENT_GOLGI_TO_ER_RETROGRADE_TRAFFIC	REACTOME_COPI_INDEPENDENT_GOLGI_TO_ER_RETROGRADE_TRAFFIC		9	0.206203	0.750222	0.753138	0.918554	1	571	tags=56%, list=35%, signal=85%
REACTOME_NUCLEAR_ENVELOPE_NE_REASSEMBLY	REACTOME_NUCLEAR_ENVELOPE_NE_REASSEMBLY		11	-0.187482	-0.762428	0.753296	1	1	884	tags=73%, list=54%, signal=158%
REACTOME_GLYCOGEN_SYNTHESIS	REACTOME_GLYCOGEN_SYNTHESIS		8	0.214286	0.750051	0.755741	0.916206	1	1283	tags=100%, list=79%, signal=465%
REACTOME_REGULATION_OF_INNATE_IMMUNE_RESPONSES_TO_CYTOSOLIC_DNA	REACTOME_REGULATION_OF_INNATE_IMMUNE_RESPONSES_TO_CYTOSOLIC_DNA		5	0.277812	0.778521	0.756098	0.912945	1	1179	tags=100%, list=72%, signal=359%
REACTOME_ACTIVATION_OF_ANTERIOR_HOX_GENES_IN_HINDBRAIN_DEVELOPMENT_DURING_EARLY_EMBRYOGENESIS	REACTOME_ACTIVATION_OF_ANTERIOR_HOX_GENES_IN_HINDBRAIN_DEVELOPMENT_DURING_EARLY_EMBRYOGENESIS		13	-0.175845	-0.76217	0.757576	1	1	344	tags=38%, list=21%, signal=48%
REACTOME_VIRAL_MESSENGER_RNA_SYNTHESIS	REACTOME_VIRAL_MESSENGER_RNA_SYNTHESIS		8	0.219212	0.767524	0.75835	0.912256	1	255	tags=38%, list=16%, signal=44%
REACTOME_GLYCOGEN_METABOLISM	REACTOME_GLYCOGEN_METABOLISM		8	0.214286	0.769979	0.759369	0.910947	1	1283	tags=100%, list=79%, signal=465%
REACTOME_TRANSPORT_OF_MATURE_TRANSCRIPT_TO_CYTOPLASM	REACTOME_TRANSPORT_OF_MATURE_TRANSCRIPT_TO_CYTOPLASM		16	0.160891	0.764007	0.760163	0.909915	1	1269	tags=94%, list=78%, signal=417%
REACTOME_PINK1_PRKN_MEDIATED_MITOPHAGY	REACTOME_PINK1_PRKN_MEDIATED_MITOPHAGY		5	0.277812	0.774332	0.76087	0.909083	1	1179	tags=100%, list=72%, signal=359%
REACTOME_SIGNALLING_TO_ERKS	REACTOME_SIGNALLING_TO_ERKS		6	-0.239237	-0.750548	0.761905	1	1	972	tags=83%, list=60%, signal=205%
REACTOME_SENSORY_PROCESSING_OF_SOUND_BY_OUTER_HAIR_CELLS_OF_THE_COCHLEA	REACTOME_SENSORY_PROCESSING_OF_SOUND_BY_OUTER_HAIR_CELLS_OF_THE_COCHLEA		6	-0.262608	-0.776129	0.763486	1	1	662	tags=67%, list=41%, signal=112%
REACTOME_APC_C_MEDIATED_DEGRADATION_OF_CELL_CYCLE_PROTEINS	REACTOME_APC_C_MEDIATED_DEGRADATION_OF_CELL_CYCLE_PROTEINS		15	0.163265	0.747851	0.764133	0.91161	1	1367	tags=100%, list=84%, signal=610%
REACTOME_TCR_SIGNALING	REACTOME_TCR_SIGNALING		13	-0.172851	-0.76589	0.764356	1	1	851	tags=69%, list=52%, signal=144%
REACTOME_INTERACTIONS_OF_VPR_WITH_HOST_CELLULAR_PROTEINS	REACTOME_INTERACTIONS_OF_VPR_WITH_HOST_CELLULAR_PROTEINS		7	0.234462	0.765485	0.766529	0.91289	1	1250	tags=100%, list=77%, signal=425%
REACTOME_INTRACELLULAR_SIGNALING_BY_SECOND_MESSENGERS	REACTOME_INTRACELLULAR_SIGNALING_BY_SECOND_MESSENGERS		21	0.135852	0.75694	0.769874	0.910392	1	1179	tags=86%, list=72%, signal=305%
REACTOME_EPHB_MEDIATED_FORWARD_SIGNALING	REACTOME_EPHB_MEDIATED_FORWARD_SIGNALING		7	-0.226901	-0.75986	0.772	1	1	798	tags=71%, list=49%, signal=139%
REACTOME_ENDOSOMAL_SORTING_COMPLEX_REQUIRED_FOR_TRANSPORT_ESCRT	REACTOME_ENDOSOMAL_SORTING_COMPLEX_REQUIRED_FOR_TRANSPORT_ESCRT		6	0.247848	0.761741	0.773196	0.910707	1	1228	tags=100%, list=75%, signal=402%
REACTOME_DARPP_32_EVENTS	REACTOME_DARPP_32_EVENTS		5	0.272403	0.765377	0.773547	0.910366	1	535	tags=60%, list=33%, signal=89%
REACTOME_MYD88_INDEPENDENT_TLR4_CASCADE	REACTOME_MYD88_INDEPENDENT_TLR4_CASCADE		10	0.200617	0.756963	0.774793	0.912974	1	816	tags=70%, list=50%, signal=139%
REACTOME_HDR_THROUGH_HOMOLOGOUS_RECOMBINATION_HRR	REACTOME_HDR_THROUGH_HOMOLOGOUS_RECOMBINATION_HRR		10	0.188656	0.748629	0.77712	0.913083	1	1325	tags=100%, list=81%, signal=528%
REACTOME_SIGNALING_BY_TGF_BETA_RECEPTOR_COMPLEX	REACTOME_SIGNALING_BY_TGF_BETA_RECEPTOR_COMPLEX		14	0.166873	0.757012	0.777555	0.915553	1	545	tags=50%, list=33%, signal=74%
REACTOME_SIGNALING_BY_NUCLEAR_RECEPTORS	REACTOME_SIGNALING_BY_NUCLEAR_RECEPTORS		29	-0.119474	-0.757045	0.778672	1	1	935	tags=69%, list=57%, signal=159%
REACTOME_SIGNALING_BY_NOTCH1	REACTOME_SIGNALING_BY_NOTCH1		10	-0.190506	-0.742231	0.784	1	1	508	tags=50%, list=31%, signal=72%
REACTOME_SYNDECAN_INTERACTIONS	REACTOME_SYNDECAN_INTERACTIONS		5	0.271789	0.749712	0.785408	0.914005	1	536	tags=60%, list=33%, signal=89%
REACTOME_CHROMOSOME_MAINTENANCE	REACTOME_CHROMOSOME_MAINTENANCE		13	0.168433	0.746045	0.785714	0.908994	1	354	tags=38%, list=22%, signal=49%
REACTOME_MITOPHAGY	REACTOME_MITOPHAGY		5	0.277812	0.744019	0.789784	0.90958	1	1179	tags=100%, list=72%, signal=359%
REACTOME_TRANSLATION_OF_SARS_COV_1_STRUCTURAL_PROTEINS	REACTOME_TRANSLATION_OF_SARS_COV_1_STRUCTURAL_PROTEINS		7	0.232967	0.746633	0.791837	0.910794	1	553	tags=57%, list=34%, signal=86%
REACTOME_EPIGENETIC_REGULATION_OF_GENE_EXPRESSION	REACTOME_EPIGENETIC_REGULATION_OF_GENE_EXPRESSION		20	0.134119	0.718354	0.795229	0.928423	1	354	tags=35%, list=22%, signal=44%
REACTOME_MITOTIC_SPINDLE_CHECKPOINT	REACTOME_MITOTIC_SPINDLE_CHECKPOINT		15	0.160544	0.741271	0.796781	0.911156	1	1045	tags=80%, list=64%, signal=220%
REACTOME_RND3_GTPASE_CYCLE	REACTOME_RND3_GTPASE_CYCLE		5	-0.263184	-0.73392	0.797297	1	1	552	tags=60%, list=34%, signal=90%
REACTOME_FACTORS_INVOLVED_IN_MEGAKARYOCYTE_DEVELOPMENT_AND_PLATELET_PRODUCTION	REACTOME_FACTORS_INVOLVED_IN_MEGAKARYOCYTE_DEVELOPMENT_AND_PLATELET_PRODUCTION		13	0.173516	0.737585	0.799213	0.911246	1	1099	tags=85%, list=67%, signal=257%
REACTOME_NUCLEAR_PORE_COMPLEX_NPC_DISASSEMBLY	REACTOME_NUCLEAR_PORE_COMPLEX_NPC_DISASSEMBLY		8	0.203818	0.71346	0.8	0.927603	1	1096	tags=88%, list=67%, signal=265%
REACTOME_REGULATION_OF_LIPID_METABOLISM_BY_PPARALPHA	REACTOME_REGULATION_OF_LIPID_METABOLISM_BY_PPARALPHA		9	-0.198398	-0.713977	0.801688	1	1	767	tags=67%, list=47%, signal=125%
REACTOME_NGF_STIMULATED_TRANSCRIPTION	REACTOME_NGF_STIMULATED_TRANSCRIPTION		6	-0.238622	-0.725958	0.805726	1	1	701	tags=67%, list=43%, signal=116%
REACTOME_BASE_EXCISION_REPAIR	REACTOME_BASE_EXCISION_REPAIR		10	0.188656	0.724204	0.808468	0.927891	1	1325	tags=100%, list=81%, signal=528%
REACTOME_PHASE_II_CONJUGATION_OF_COMPOUNDS	REACTOME_PHASE_II_CONJUGATION_OF_COMPOUNDS		8	-0.208128	-0.710493	0.8107	1	1	1091	tags=88%, list=67%, signal=263%
REACTOME_INTEGRATION_OF_ENERGY_METABOLISM	REACTOME_INTEGRATION_OF_ENERGY_METABOLISM		11	-0.178565	-0.710565	0.811475	1	1	305	tags=36%, list=19%, signal=44%
REACTOME_SIGNALING_BY_NOTCH	REACTOME_SIGNALING_BY_NOTCH		21	0.136738	0.738405	0.815534	0.912833	1	1333	tags=95%, list=82%, signal=513%
REACTOME_HCMV_LATE_EVENTS	REACTOME_HCMV_LATE_EVENTS		13	0.168433	0.718718	0.817476	0.930515	1	354	tags=38%, list=22%, signal=49%
REACTOME_MAPK6_MAPK4_SIGNALING	REACTOME_MAPK6_MAPK4_SIGNALING		13	-0.162969	-0.716356	0.818182	1	1	867	tags=69%, list=53%, signal=147%
REACTOME_RAB_REGULATION_OF_TRAFFICKING	REACTOME_RAB_REGULATION_OF_TRAFFICKING		13	0.164394	0.709036	0.821429	0.925754	1	235	tags=31%, list=14%, signal=36%
REACTOME_TP53_REGULATES_TRANSCRIPTION_OF_CELL_CYCLE_GENES	REACTOME_TP53_REGULATES_TRANSCRIPTION_OF_CELL_CYCLE_GENES		6	-0.242927	-0.715826	0.827511	1	1	966	tags=83%, list=59%, signal=203%
REACTOME_MITOTIC_PROPHASE	REACTOME_MITOTIC_PROPHASE		17	0.141176	0.709554	0.828629	0.92766	1	443	tags=41%, list=27%, signal=56%
REACTOME_CYTOPROTECTION_BY_HMOX1	REACTOME_CYTOPROTECTION_BY_HMOX1		17	0.139319	0.686229	0.829026	0.942103	1	1310	tags=94%, list=80%, signal=472%
REACTOME_NEGATIVE_REGULATION_OF_FGFR4_SIGNALING	REACTOME_NEGATIVE_REGULATION_OF_FGFR4_SIGNALING		6	-0.223247	-0.696316	0.829218	1	1	454	tags=50%, list=28%, signal=69%
REACTOME_MUSCLE_CONTRACTION	REACTOME_MUSCLE_CONTRACTION		10	0.178052	0.705098	0.834356	0.928297	1	363	tags=40%, list=22%, signal=51%
REACTOME_RHOBTB1_GTPASE_CYCLE	REACTOME_RHOBTB1_GTPASE_CYCLE		9	0.198398	0.717666	0.835341	0.924347	1	1309	tags=100%, list=80%, signal=502%
REACTOME_SIGNALING_BY_THE_B_CELL_RECEPTOR_BCR	REACTOME_SIGNALING_BY_THE_B_CELL_RECEPTOR_BCR		17	0.143653	0.718161	0.837782	0.926113	1	343	tags=35%, list=21%, signal=44%
REACTOME_SIGNALING_BY_ERBB2	REACTOME_SIGNALING_BY_ERBB2		7	0.218725	0.720251	0.838776	0.930878	1	343	tags=43%, list=21%, signal=54%
REACTOME_GAP_FILLING_DNA_REPAIR_SYNTHESIS_AND_LIGATION_IN_GG_NER	REACTOME_GAP_FILLING_DNA_REPAIR_SYNTHESIS_AND_LIGATION_IN_GG_NER		7	0.218725	0.699052	0.840319	0.933582	1	343	tags=43%, list=21%, signal=54%
REACTOME_RNA_POLYMERASE_III_TRANSCRIPTION_TERMINATION	REACTOME_RNA_POLYMERASE_III_TRANSCRIPTION_TERMINATION		5	0.243884	0.687533	0.847826	0.943023	1	255	tags=40%, list=16%, signal=47%
REACTOME_GLYCOSPHINGOLIPID_METABOLISM	REACTOME_GLYCOSPHINGOLIPID_METABOLISM		5	-0.245237	-0.695753	0.854545	1	1	1234	tags=100%, list=76%, signal=409%
REACTOME_SIGNALING_BY_CSF3_G_CSF	REACTOME_SIGNALING_BY_CSF3_G_CSF		10	0.178052	0.682229	0.855186	0.944359	1	1179	tags=90%, list=72%, signal=322%
REACTOME_SPRY_REGULATION_OF_FGF_SIGNALING	REACTOME_SPRY_REGULATION_OF_FGF_SIGNALING		6	-0.223247	-0.684871	0.855769	1	1	454	tags=50%, list=28%, signal=69%
REACTOME_SIGNALING_BY_WNT	REACTOME_SIGNALING_BY_WNT		30	-0.10412	-0.6682	0.862069	1	1	1303	tags=90%, list=80%, signal=438%
REACTOME_EPH_EPHRIN_SIGNALING	REACTOME_EPH_EPHRIN_SIGNALING		15	0.147805	0.693121	0.862403	0.938654	1	1392	tags=100%, list=85%, signal=674%
REACTOME_NUCLEAR_ENVELOPE_BREAKDOWN	REACTOME_NUCLEAR_ENVELOPE_BREAKDOWN		8	0.203818	0.712268	0.865462	0.926591	1	1096	tags=88%, list=67%, signal=265%
REACTOME_INTERLEUKIN_17_SIGNALING	REACTOME_INTERLEUKIN_17_SIGNALING		7	0.214593	0.681763	0.86747	0.942396	1	816	tags=71%, list=50%, signal=142%
REACTOME_NEGATIVE_REGULATION_OF_FGFR3_SIGNALING	REACTOME_NEGATIVE_REGULATION_OF_FGFR3_SIGNALING		6	-0.223247	-0.682111	0.869388	1	1	454	tags=50%, list=28%, signal=69%
REACTOME_CELL_DEATH_SIGNALLING_VIA_NRAGE_NRIF_AND_NADE	REACTOME_CELL_DEATH_SIGNALLING_VIA_NRAGE_NRIF_AND_NADE		14	-0.152304	-0.677484	0.873346	1	1	454	tags=43%, list=28%, signal=59%
REACTOME_BUDDING_AND_MATURATION_OF_HIV_VIRION	REACTOME_BUDDING_AND_MATURATION_OF_HIV_VIRION		5	0.247695	0.676547	0.873747	0.946064	1	1228	tags=100%, list=75%, signal=403%
REACTOME_RNA_POLYMERASE_III_TRANSCRIPTION_INITIATION_FROM_TYPE_3_PROMOTER	REACTOME_RNA_POLYMERASE_III_TRANSCRIPTION_INITIATION_FROM_TYPE_3_PROMOTER		5	0.243884	0.673527	0.874286	0.944438	1	255	tags=40%, list=16%, signal=47%
REACTOME_ESR_MEDIATED_SIGNALING	REACTOME_ESR_MEDIATED_SIGNALING		17	0.13808	0.67096	0.875264	0.939923	1	64	tags=18%, list=4%, signal=18%
REACTOME_RHO_GTPASE_EFFECTORS	REACTOME_RHO_GTPASE_EFFECTORS		46	0.0842152	0.660065	0.877301	0.944666	1	1391	tags=93%, list=85%, signal=615%
REACTOME_NEGATIVE_REGULATION_OF_FGFR1_SIGNALING	REACTOME_NEGATIVE_REGULATION_OF_FGFR1_SIGNALING		6	-0.223247	-0.675084	0.87782	1	1	454	tags=50%, list=28%, signal=69%
REACTOME_MYOCLONIC_EPILEPSY_OF_LAFORA	REACTOME_MYOCLONIC_EPILEPSY_OF_LAFORA		6	0.214022	0.671638	0.878049	0.941695	1	1283	tags=100%, list=79%, signal=466%
REACTOME_SMAD2_SMAD3_SMAD4_HETEROTRIMER_REGULATES_TRANSCRIPTION	REACTOME_SMAD2_SMAD3_SMAD4_HETEROTRIMER_REGULATES_TRANSCRIPTION		6	-0.223247	-0.668085	0.878407	1	1	454	tags=50%, list=28%, signal=69%
REACTOME_APC_C_CDC20_MEDIATED_DEGRADATION_OF_CYCLIN_B	REACTOME_APC_C_CDC20_MEDIATED_DEGRADATION_OF_CYCLIN_B		9	0.185048	0.674461	0.878788	0.945949	1	968	tags=78%, list=59%, signal=190%
REACTOME_NEGATIVE_REGULATION_OF_FGFR2_SIGNALING	REACTOME_NEGATIVE_REGULATION_OF_FGFR2_SIGNALING		6	-0.223247	-0.666758	0.882105	1	1	454	tags=50%, list=28%, signal=69%
REACTOME_RETROGRADE_TRANSPORT_AT_THE_TRANS_GOLGI_NETWORK	REACTOME_RETROGRADE_TRANSPORT_AT_THE_TRANS_GOLGI_NETWORK		8	-0.19335	-0.659333	0.882704	1	1	1115	tags=88%, list=68%, signal=275%
REACTOME_DOWNSTREAM_SIGNALING_EVENTS_OF_B_CELL_RECEPTOR_BCR	REACTOME_DOWNSTREAM_SIGNALING_EVENTS_OF_B_CELL_RECEPTOR_BCR		15	-0.147186	-0.684681	0.883858	1	1	851	tags=67%, list=52%, signal=138%
REACTOME_SIGNALING_BY_HEDGEHOG	REACTOME_SIGNALING_BY_HEDGEHOG		16	0.136757	0.651945	0.884381	0.950755	1	1410	tags=100%, list=86%, signal=728%
REACTOME_RNA_POLYMERASE_III_CHAIN_ELONGATION	REACTOME_RNA_POLYMERASE_III_CHAIN_ELONGATION		5	0.243884	0.673467	0.887129	0.941988	1	255	tags=40%, list=16%, signal=47%
REACTOME_INTERLEUKIN_3_INTERLEUKIN_5_AND_GM_CSF_SIGNALING	REACTOME_INTERLEUKIN_3_INTERLEUKIN_5_AND_GM_CSF_SIGNALING		9	-0.183816	-0.658574	0.88961	1	1	972	tags=78%, list=60%, signal=191%
REACTOME_CELLULAR_RESPONSE_TO_CHEMICAL_STRESS	REACTOME_CELLULAR_RESPONSE_TO_CHEMICAL_STRESS		23	0.11687	0.669024	0.892405	0.939648	1	1372	tags=96%, list=84%, signal=592%
REACTOME_SIGNALING_BY_RECEPTOR_TYROSINE_KINASES	REACTOME_SIGNALING_BY_RECEPTOR_TYROSINE_KINASES		57	0.0744528	0.639056	0.893701	0.9587	1	1027	tags=70%, list=63%, signal=183%
REACTOME_METABOLISM_OF_STEROIDS	REACTOME_METABOLISM_OF_STEROIDS		15	-0.139518	-0.656859	0.894531	1	1	1081	tags=80%, list=66%, signal=235%
REACTOME_RHO_GTPASES_ACTIVATE_PAKS	REACTOME_RHO_GTPASES_ACTIVATE_PAKS		7	0.208352	0.662556	0.895551	0.944511	1	593	tags=57%, list=36%, signal=89%
REACTOME_ANTI_INFLAMMATORY_RESPONSE_FAVOURING_LEISHMANIA_PARASITE_INFECTION	REACTOME_ANTI_INFLAMMATORY_RESPONSE_FAVOURING_LEISHMANIA_PARASITE_INFECTION		7	-0.209055	-0.674368	0.89603	1	1	827	tags=71%, list=51%, signal=144%
REACTOME_GLYCOGEN_STORAGE_DISEASES	REACTOME_GLYCOGEN_STORAGE_DISEASES		6	0.214022	0.647832	0.9	0.952399	1	1283	tags=100%, list=79%, signal=466%
REACTOME_FLT3_SIGNALING	REACTOME_FLT3_SIGNALING		6	-0.212177	-0.629082	0.901235	1	1	472	tags=50%, list=29%, signal=70%
REACTOME_SYNTHESIS_OF_PA	REACTOME_SYNTHESIS_OF_PA		6	-0.206027	-0.643386	0.902748	1	1	1298	tags=100%, list=80%, signal=487%
REACTOME_RHO_GTPASES_ACTIVATE_ROCKS	REACTOME_RHO_GTPASES_ACTIVATE_ROCKS		7	0.194989	0.626035	0.906314	0.96355	1	1081	tags=86%, list=66%, signal=253%
REACTOME_PYRUVATE_METABOLISM	REACTOME_PYRUVATE_METABOLISM		8	-0.179187	-0.629643	0.911647	1	1	934	tags=75%, list=57%, signal=174%
REACTOME_SIGNALING_BY_NTRKS	REACTOME_SIGNALING_BY_NTRKS		22	0.109881	0.626739	0.913481	0.965414	1	1009	tags=73%, list=62%, signal=188%
REACTOME_IRON_UPTAKE_AND_TRANSPORT	REACTOME_IRON_UPTAKE_AND_TRANSPORT		9	0.166975	0.626846	0.919291	0.967826	1	816	tags=67%, list=50%, signal=133%
REACTOME_HEDGEHOG_ON_STATE	REACTOME_HEDGEHOG_ON_STATE		9	-0.167591	-0.606447	0.921844	1	1	817	tags=67%, list=50%, signal=133%
REACTOME_SARS_COV_2_INFECTION	REACTOME_SARS_COV_2_INFECTION		11	0.153889	0.611156	0.922772	0.971213	1	343	tags=36%, list=21%, signal=46%
REACTOME_MITOCHONDRIAL_FATTY_ACID_BETA_OXIDATION	REACTOME_MITOCHONDRIAL_FATTY_ACID_BETA_OXIDATION		6	0.202952	0.625357	0.926587	0.961677	1	1301	tags=100%, list=80%, signal=491%
REACTOME_REGULATION_OF_RUNX2_EXPRESSION_AND_ACTIVITY	REACTOME_REGULATION_OF_RUNX2_EXPRESSION_AND_ACTIVITY		9	-0.167591	-0.612462	0.92779	1	1	817	tags=67%, list=50%, signal=133%
REACTOME_BETA_CATENIN_INDEPENDENT_WNT_SIGNALING	REACTOME_BETA_CATENIN_INDEPENDENT_WNT_SIGNALING		19	-0.119653	-0.627794	0.928433	1	1	1440	tags=100%, list=88%, signal=840%
REACTOME_DUAL_INCISION_IN_TC_NER	REACTOME_DUAL_INCISION_IN_TC_NER		13	-0.137882	-0.595204	0.92955	1	1	531	tags=46%, list=33%, signal=68%
REACTOME_HEDGEHOG_OFF_STATE	REACTOME_HEDGEHOG_OFF_STATE		14	0.136588	0.599741	0.93083	0.975262	1	1410	tags=100%, list=86%, signal=729%
REACTOME_SIGNALING_BY_NOTCH3	REACTOME_SIGNALING_BY_NOTCH3		9	-0.167591	-0.605925	0.934524	1	1	817	tags=67%, list=50%, signal=133%
REACTOME_FCERI_MEDIATED_CA_2_MOBILIZATION	REACTOME_FCERI_MEDIATED_CA_2_MOBILIZATION		5	0.212661	0.596685	0.934959	0.975163	1	1285	tags=100%, list=79%, signal=469%
REACTOME_DISEASES_OF_CARBOHYDRATE_METABOLISM	REACTOME_DISEASES_OF_CARBOHYDRATE_METABOLISM		9	0.163278	0.600553	0.940239	0.977143	1	822	tags=67%, list=50%, signal=134%
REACTOME_SIGNALING_BY_PDGFR_IN_DISEASE	REACTOME_SIGNALING_BY_PDGFR_IN_DISEASE		5	-0.211309	-0.583221	0.945833	1	1	310	tags=40%, list=19%, signal=49%
REACTOME_REGULATION_OF_TP53_EXPRESSION_AND_DEGRADATION	REACTOME_REGULATION_OF_TP53_EXPRESSION_AND_DEGRADATION		9	0.162662	0.594078	0.94683	0.974705	1	1367	tags=100%, list=84%, signal=612%
REACTOME_PCP_CE_PATHWAY	REACTOME_PCP_CE_PATHWAY		16	-0.119431	-0.575854	0.94856	1	1	1440	tags=100%, list=88%, signal=842%
REACTOME_TRANSCRIPTIONAL_ACTIVATION_OF_MITOCHONDRIAL_BIOGENESIS	REACTOME_TRANSCRIPTIONAL_ACTIVATION_OF_MITOCHONDRIAL_BIOGENESIS		5	-0.199017	-0.571075	0.94929	1	1	330	tags=40%, list=20%, signal=50%
REACTOME_DEVELOPMENTAL_BIOLOGY	REACTOME_DEVELOPMENTAL_BIOLOGY		121	0.0457635	0.566403	0.954357	0.990387	1	1400	tags=90%, list=86%, signal=587%
REACTOME_TRANSCRIPTION_OF_THE_HIV_GENOME	REACTOME_TRANSCRIPTION_OF_THE_HIV_GENOME		10	-0.148829	-0.579074	0.955375	1	1	86	tags=20%, list=5%, signal=21%
REACTOME_DOWNREGULATION_OF_ERBB4_SIGNALING	REACTOME_DOWNREGULATION_OF_ERBB4_SIGNALING		5	0.189797	0.53223	0.968128	0.996804	1	343	tags=40%, list=21%, signal=50%
REACTOME_CELL_SURFACE_INTERACTIONS_AT_THE_VASCULAR_WALL	REACTOME_CELL_SURFACE_INTERACTIONS_AT_THE_VASCULAR_WALL		10	-0.149692	-0.57321	0.968379	1	1	1227	tags=90%, list=75%, signal=360%
REACTOME_TICAM1_DEPENDENT_ACTIVATION_OF_IRF3_IRF7	REACTOME_TICAM1_DEPENDENT_ACTIVATION_OF_IRF3_IRF7		5	0.189797	0.537338	0.971209	0.999732	1	343	tags=40%, list=21%, signal=50%
REACTOME_DEACTIVATION_OF_THE_BETA_CATENIN_TRANSACTIVATING_COMPLEX	REACTOME_DEACTIVATION_OF_THE_BETA_CATENIN_TRANSACTIVATING_COMPLEX		7	-0.16844	-0.547933	0.972603	1	1	893	tags=71%, list=55%, signal=157%
REACTOME_ACTIVATION_OF_IRF3_IRF7_MEDIATED_BY_TBK1_IKK_EPSILON	REACTOME_ACTIVATION_OF_IRF3_IRF7_MEDIATED_BY_TBK1_IKK_EPSILON		5	0.189797	0.535947	0.973843	0.997765	1	343	tags=40%, list=21%, signal=50%
REACTOME_HIV_TRANSCRIPTION_INITIATION	REACTOME_HIV_TRANSCRIPTION_INITIATION		5	-0.195821	-0.539876	0.974155	1	1	988	tags=80%, list=61%, signal=202%
REACTOME_SARS_COV_1_INFECTION	REACTOME_SARS_COV_1_INFECTION		10	0.138718	0.541799	0.974843	1	1	1406	tags=100%, list=86%, signal=718%
REACTOME_TBC_RABGAPS	REACTOME_TBC_RABGAPS		7	0.158066	0.512205	0.977143	0.989151	1	1141	tags=86%, list=70%, signal=284%
REACTOME_CARBOXYTERMINAL_POST_TRANSLATIONAL_MODIFICATIONS_OF_TUBULIN	REACTOME_CARBOXYTERMINAL_POST_TRANSLATIONAL_MODIFICATIONS_OF_TUBULIN		6	0.169127	0.521578	0.979466	0.998363	1	1356	tags=100%, list=83%, signal=589%
REACTOME_G_ALPHA_I_SIGNALLING_EVENTS	REACTOME_G_ALPHA_I_SIGNALLING_EVENTS		14	-0.121667	-0.550179	0.980119	1	1	387	tags=36%, list=24%, signal=46%
REACTOME_EGFR_DOWNREGULATION	REACTOME_EGFR_DOWNREGULATION		6	-0.167282	-0.507952	0.983936	1	1	817	tags=67%, list=50%, signal=133%
REACTOME_REGULATION_OF_FZD_BY_UBIQUITINATION	REACTOME_REGULATION_OF_FZD_BY_UBIQUITINATION		5	0.189797	0.515517	0.984405	0.992988	1	343	tags=40%, list=21%, signal=50%
REACTOME_P75_NTR_RECEPTOR_MEDIATED_SIGNALLING	REACTOME_P75_NTR_RECEPTOR_MEDIATED_SIGNALLING		16	-0.105198	-0.503462	0.984645	0.998642	1	851	tags=63%, list=52%, signal=129%
REACTOME_SIGNALING_BY_EGFR_IN_CANCER	REACTOME_SIGNALING_BY_EGFR_IN_CANCER		6	-0.167282	-0.506737	0.984946	1	1	817	tags=67%, list=50%, signal=133%
REACTOME_REGULATION_OF_SIGNALING_BY_CBL	REACTOME_REGULATION_OF_SIGNALING_BY_CBL		6	0.166667	0.513841	0.985477	0.991075	1	816	tags=67%, list=50%, signal=133%
REACTOME_ADORA2B_MEDIATED_ANTI_INFLAMMATORY_CYTOKINES_PRODUCTION	REACTOME_ADORA2B_MEDIATED_ANTI_INFLAMMATORY_CYTOKINES_PRODUCTION		5	-0.183651	-0.520542	0.985597	1	1	355	tags=40%, list=22%, signal=51%
REACTOME_SIGNALING_BY_BRAF_AND_RAF_FUSIONS	REACTOME_SIGNALING_BY_BRAF_AND_RAF_FUSIONS		5	0.17689	0.503742	0.987097	0.986858	1	364	tags=40%, list=22%, signal=51%
REACTOME_MRNA_SPLICING_MINOR_PATHWAY	REACTOME_MRNA_SPLICING_MINOR_PATHWAY		14	0.11478	0.518029	0.987629	0.994646	1	979	tags=71%, list=60%, signal=177%
REACTOME_NUCLEOTIDE_EXCISION_REPAIR	REACTOME_NUCLEOTIDE_EXCISION_REPAIR		19	0.0973668	0.519098	0.988528	0.996757	1	615	tags=47%, list=38%, signal=75%
REACTOME_TRANSCRIPTIONAL_REGULATION_OF_WHITE_ADIPOCYTE_DIFFERENTIATION	REACTOME_TRANSCRIPTIONAL_REGULATION_OF_WHITE_ADIPOCYTE_DIFFERENTIATION		9	-0.136784	-0.493424	0.988658	0.989929	1	867	tags=67%, list=53%, signal=141%
REACTOME_SIGNALING_BY_NOTCH1_PEST_DOMAIN_MUTANTS_IN_CANCER	REACTOME_SIGNALING_BY_NOTCH1_PEST_DOMAIN_MUTANTS_IN_CANCER		9	-0.134525	-0.498092	0.989407	0.99443	1	508	tags=44%, list=31%, signal=64%
REACTOME_RHO_GTPASES_ACTIVATE_CIT	REACTOME_RHO_GTPASES_ACTIVATE_CIT		8	0.141626	0.505951	0.989879	0.988679	1	177	tags=25%, list=11%, signal=28%
REACTOME_DEATH_RECEPTOR_SIGNALLING	REACTOME_DEATH_RECEPTOR_SIGNALLING		25	-0.0837088	-0.503538	0.992	1	1	454	tags=36%, list=28%, signal=49%
REACTOME_CONSTITUTIVE_SIGNALING_BY_LIGAND_RESPONSIVE_EGFR_CANCER_VARIANTS	REACTOME_CONSTITUTIVE_SIGNALING_BY_LIGAND_RESPONSIVE_EGFR_CANCER_VARIANTS		6	-0.167282	-0.51174	0.994024	1	1	817	tags=67%, list=50%, signal=133%
