# Supplementary material for: An organ-on-chip model of pulmonary arterial hypertension identifies a BMPR2-SOX17-prostacyclin signalling axis
Source: Commun Biol. 2022 Nov 7;5:1192. doi: 10.1038/s42003-022-04169-z (PMC9640600; doi:10.1038/s42003-022-04169-z)
Supplement: Supplementary file 12 — Supplementary Data 9 [file 42003_2022_4169_MOESM12_ESM.xlsx]

## Sheet: HALLMARK
NAME	GS<br> follow link to MSigDB	GS DETAILS	SIZE	ES	NES	NOM p-val	FDR q-val	FWER p-val	RANK AT MAX	LEADING EDGE
HALLMARK_HYPOXIA	HALLMARK_HYPOXIA	Details ...	22	0.638389	3.49163	0	0	0	109	tags=86%, list=26%, signal=110%
HALLMARK_INTERFERON_ALPHA_RESPONSE	HALLMARK_INTERFERON_ALPHA_RESPONSE	Details ...	5	0.824228	2.27182	0	0.00183203	0.005	78	tags=100%, list=18%, signal=121%
HALLMARK_MTORC1_SIGNALING	HALLMARK_MTORC1_SIGNALING	Details ...	14	0.545423	2.45731	0.0019802	0.00234805	0.004	109	tags=79%, list=26%, signal=102%
HALLMARK_GLYCOLYSIS	HALLMARK_GLYCOLYSIS	Details ...	22	0.34586	1.93746	0.00199203	0.0157908	0.07	111	tags=59%, list=26%, signal=76%
HALLMARK_INTERFERON_GAMMA_RESPONSE	HALLMARK_INTERFERON_GAMMA_RESPONSE	Details ...	8	0.575359	1.98138	0.0095057	0.0170281	0.061	78	tags=75%, list=18%, signal=90%
HALLMARK_MITOTIC_SPINDLE	HALLMARK_MITOTIC_SPINDLE	Details ...	12	-0.365942	-1.53483	0.0651731	0.531705	0.471	169	tags=75%, list=40%, signal=121%
HALLMARK_E2F_TARGETS	HALLMARK_E2F_TARGETS	Details ...	16	-0.321951	-1.52741	0.0679406	0.275382	0.481	295	tags=100%, list=69%, signal=313%
HALLMARK_APICAL_JUNCTION	HALLMARK_APICAL_JUNCTION	Details ...	5	-0.510689	-1.45073	0.0785441	0.260377	0.604	212	tags=100%, list=50%, signal=197%
HALLMARK_G2M_CHECKPOINT	HALLMARK_G2M_CHECKPOINT	Details ...	20	-0.26601	-1.42376	0.0989899	0.175553	0.647	319	tags=100%, list=75%, signal=379%
HALLMARK_MYC_TARGETS_V2	HALLMARK_MYC_TARGETS_V2	Details ...	5	-0.524941	-1.44058	0.10058	0.203292	0.616	206	tags=100%, list=48%, signal=191%
HALLMARK_APOPTOSIS	HALLMARK_APOPTOSIS	Details ...	5	0.486461	1.3256	0.148496	0.302854	0.827	135	tags=80%, list=32%, signal=116%
HALLMARK_ADIPOGENESIS	HALLMARK_ADIPOGENESIS	Details ...	8	0.337321	1.15622	0.262195	0.470886	0.957	71	tags=50%, list=17%, signal=59%
HALLMARK_IL2_STAT5_SIGNALING	HALLMARK_IL2_STAT5_SIGNALING	Details ...	12	-0.269324	-1.10725	0.3138	0.471858	0.969	138	tags=58%, list=32%, signal=84%
HALLMARK_MYC_TARGETS_V1	HALLMARK_MYC_TARGETS_V1	Details ...	8	-0.300837	-1.02863	0.403471	0.51841	0.99	248	tags=88%, list=58%, signal=205%
HALLMARK_HEME_METABOLISM	HALLMARK_HEME_METABOLISM	Details ...	7	0.313672	1.0254	0.419223	0.609592	0.992	111	tags=57%, list=26%, signal=76%
HALLMARK_TNFA_SIGNALING_VIA_NFKB	HALLMARK_TNFA_SIGNALING_VIA_NFKB	Details ...	6	0.283333	0.875767	0.597656	0.802332	0.999	306	tags=100%, list=72%, signal=350%
HALLMARK_MYOGENESIS	HALLMARK_MYOGENESIS	Details ...	6	-0.264286	-0.817621	0.680233	0.77703	1	316	tags=100%, list=74%, signal=382%
HALLMARK_EPITHELIAL_MESENCHYMAL_TRANSITION	HALLMARK_EPITHELIAL_MESENCHYMAL_TRANSITION	Details ...	10	0.192788	0.731565	0.771134	0.963872	1	4	tags=20%, list=1%, signal=20%
HALLMARK_P53_PATHWAY	HALLMARK_P53_PATHWAY	Details ...	8	-0.162081	-0.558959	0.952282	0.962868	1	306	tags=88%, list=72%, signal=305%
HALLMARK_UV_RESPONSE_UP	HALLMARK_UV_RESPONSE_UP	Details ...	7	0.161268	0.517328	0.976331	1	1	114	tags=43%, list=27%, signal=58%
HALLMARK_ESTROGEN_RESPONSE_EARLY	HALLMARK_ESTROGEN_RESPONSE_EARLY	Details ...	5	0.169596	0.477248	0.995976	0.993218	1	98	tags=40%, list=23%, signal=51%

## Sheet: KEGG
NAME	GS<br> follow link to MSigDB	GS DETAILS	SIZE	ES	NES	NOM p-val	FDR q-val	FWER p-val	RANK AT MAX	LEADING EDGE
KEGG_GLYCOLYSIS_GLUCONEOGENESIS	KEGG_GLYCOLYSIS_GLUCONEOGENESIS	Details ...	10	0.68125	2.5923	0	0	0	99	tags=90%, list=23%, signal=114%
KEGG_FRUCTOSE_AND_MANNOSE_METABOLISM	KEGG_FRUCTOSE_AND_MANNOSE_METABOLISM	Details ...	5	0.626603	1.7547	0.016	0.0160472	0.085	76	tags=80%, list=18%, signal=96%
KEGG_PENTOSE_PHOSPHATE_PATHWAY	KEGG_PENTOSE_PHOSPHATE_PATHWAY	Details ...	5	0.63848	1.78552	0.0200803	0.0205619	0.073	71	tags=80%, list=17%, signal=95%
KEGG_CELL_CYCLE	KEGG_CELL_CYCLE	Details ...	9	-0.429257	-1.56101	0.0427184	0.440778	0.262	248	tags=100%, list=58%, signal=234%
KEGG_PROGESTERONE_MEDIATED_OOCYTE_MATURATION	KEGG_PROGESTERONE_MEDIATED_OOCYTE_MATURATION	Details ...	5	-0.503563	-1.391	0.11946	0.44849	0.472	215	tags=100%, list=50%, signal=200%
KEGG_GLYCEROPHOSPHOLIPID_METABOLISM	KEGG_GLYCEROPHOSPHOLIPID_METABOLISM	Details ...	6	-0.445238	-1.34874	0.135628	0.358473	0.538	240	tags=100%, list=56%, signal=226%
KEGG_PURINE_METABOLISM	KEGG_PURINE_METABOLISM	Details ...	7	-0.368565	-1.19503	0.226121	0.480943	0.745	90	tags=57%, list=21%, signal=71%
KEGG_HUNTINGTONS_DISEASE	KEGG_HUNTINGTONS_DISEASE	Details ...	6	-0.366667	-1.14	0.255624	0.380894	0.812	202	tags=83%, list=47%, signal=156%
KEGG_OOCYTE_MEIOSIS	KEGG_OOCYTE_MEIOSIS	Details ...	7	-0.360723	-1.15037	0.275794	0.443179	0.796	215	tags=86%, list=50%, signal=170%
KEGG_PATHWAYS_IN_CANCER	KEGG_PATHWAYS_IN_CANCER	Details ...	12	-0.171498	-0.702305	0.83432	0.963694	0.999	143	tags=50%, list=34%, signal=73%
KEGG_PHOSPHATIDYLINOSITOL_SIGNALING_SYSTEM	KEGG_PHOSPHATIDYLINOSITOL_SIGNALING_SYSTEM	Details ...	5	-0.223278	-0.627345	0.924453	0.921491	1	333	tags=100%, list=78%, signal=453%

## Sheet: Reactome
NAME	GS<br> follow link to MSigDB	GS DETAILS	SIZE	ES	NES	NOM p-val	FDR q-val	FWER p-val	RANK AT MAX	LEADING EDGE
REACTOME_GLYCOLYSIS	REACTOME_GLYCOLYSIS	Details ...	9	0.668265	2.43076	0	0.0068622	0.007	99	tags=89%, list=23%, signal=113%
REACTOME_NEUTROPHIL_DEGRANULATION	REACTOME_NEUTROPHIL_DEGRANULATION	Details ...	7	0.670644	2.1458	0	0.0422646	0.085	144	tags=100%, list=34%, signal=149%
REACTOME_GLUCOSE_METABOLISM	REACTOME_GLUCOSE_METABOLISM	Details ...	12	0.501208	2.05912	0	0.0419155	0.165	111	tags=75%, list=26%, signal=99%
REACTOME_GLUCONEOGENESIS	REACTOME_GLUCONEOGENESIS	Details ...	10	0.55	2.09288	0.002	0.0464789	0.137	111	tags=80%, list=26%, signal=106%
REACTOME_CYTOKINE_SIGNALING_IN_IMMUNE_SYSTEM	REACTOME_CYTOKINE_SIGNALING_IN_IMMUNE_SYSTEM	Details ...	13	0.47141	1.99218	0.00610998	0.05449	0.248	132	tags=77%, list=31%, signal=108%
REACTOME_METABOLISM_OF_CARBOHYDRATES	REACTOME_METABOLISM_OF_CARBOHYDRATES	Details ...	21	0.374603	1.98705	0.00788955	0.0466044	0.253	111	tags=62%, list=26%, signal=80%
REACTOME_CDC42_GTPASE_CYCLE	REACTOME_CDC42_GTPASE_CYCLE	Details ...	5	-0.652732	-1.81341	0.00828157	0.791894	0.524	67	tags=80%, list=16%, signal=94%
REACTOME_INTERFERON_SIGNALING	REACTOME_INTERFERON_SIGNALING	Details ...	6	0.592857	1.78794	0.00994036	0.111467	0.613	105	tags=83%, list=25%, signal=109%
REACTOME_INNATE_IMMUNE_SYSTEM	REACTOME_INNATE_IMMUNE_SYSTEM	Details ...	19	0.371137	1.92534	0.0114068	0.0575022	0.341	117	tags=63%, list=27%, signal=83%
REACTOME_MITOTIC_METAPHASE_AND_ANAPHASE	REACTOME_MITOTIC_METAPHASE_AND_ANAPHASE	Details ...	11	-0.435049	-1.73281	0.0144628	0.628841	0.691	169	tags=82%, list=40%, signal=132%
REACTOME_MITOTIC_PROMETAPHASE	REACTOME_MITOTIC_PROMETAPHASE	Details ...	13	-0.386664	-1.68174	0.0334646	0.563452	0.792	169	tags=77%, list=40%, signal=124%
REACTOME_ORGANELLE_BIOGENESIS_AND_MAINTENANCE	REACTOME_ORGANELLE_BIOGENESIS_AND_MAINTENANCE	Details ...	12	-0.39372	-1.64936	0.0457256	0.496018	0.845	264	tags=100%, list=62%, signal=256%
REACTOME_RHO_GTPASES_ACTIVATE_FORMINS	REACTOME_RHO_GTPASES_ACTIVATE_FORMINS	Details ...	9	-0.427658	-1.57419	0.0471311	0.481049	0.931	154	tags=78%, list=36%, signal=119%
REACTOME_RESOLUTION_OF_SISTER_CHROMATID_COHESION	REACTOME_RESOLUTION_OF_SISTER_CHROMATID_COHESION	Details ...	10	-0.415385	-1.5932	0.0489796	0.525309	0.909	169	tags=80%, list=40%, signal=129%
REACTOME_SUMOYLATION	REACTOME_SUMOYLATION	Details ...	11	0.380285	1.5122	0.0539957	0.348945	0.982	151	tags=73%, list=35%, signal=110%
REACTOME_SIGNALING_BY_NOTCH	REACTOME_SIGNALING_BY_NOTCH	Details ...	6	0.509524	1.55001	0.0552017	0.325013	0.961	69	tags=67%, list=16%, signal=78%
REACTOME_RHOA_GTPASE_CYCLE	REACTOME_RHOA_GTPASE_CYCLE	Details ...	7	-0.449028	-1.48282	0.0742972	0.630411	0.985	178	tags=86%, list=42%, signal=145%
REACTOME_SEPARATION_OF_SISTER_CHROMATIDS	REACTOME_SEPARATION_OF_SISTER_CHROMATIDS	Details ...	9	-0.391687	-1.43171	0.0930233	0.694121	0.996	169	tags=78%, list=40%, signal=126%
REACTOME_MITOTIC_PROPHASE	REACTOME_MITOTIC_PROPHASE	Details ...	6	0.483333	1.44671	0.0945674	0.421249	0.994	80	tags=67%, list=19%, signal=81%
REACTOME_MITOTIC_SPINDLE_CHECKPOINT	REACTOME_MITOTIC_SPINDLE_CHECKPOINT	Details ...	8	-0.398325	-1.38891	0.108108	0.743309	0.999	154	tags=75%, list=36%, signal=115%
REACTOME_TP53_REGULATES_TRANSCRIPTION_OF_CELL_DEATH_GENES	REACTOME_TP53_REGULATES_TRANSCRIPTION_OF_CELL_DEATH_GENES	Details ...	5	0.493587	1.3617	0.114583	0.550854	1	132	tags=80%, list=31%, signal=115%
REACTOME_NERVOUS_SYSTEM_DEVELOPMENT	REACTOME_NERVOUS_SYSTEM_DEVELOPMENT	Details ...	8	-0.393541	-1.36502	0.128205	0.732405	0.999	156	tags=75%, list=37%, signal=116%
REACTOME_CELL_CYCLE	REACTOME_CELL_CYCLE	Details ...	36	-0.194017	-1.32202	0.139004	0.720992	1	304	tags=89%, list=71%, signal=284%
REACTOME_DISEASES_OF_SIGNAL_TRANSDUCTION_BY_GROWTH_FACTOR_RECEPTORS_AND_SECOND_MESSENGERS	REACTOME_DISEASES_OF_SIGNAL_TRANSDUCTION_BY_GROWTH_FACTOR_RECEPTORS_AND_SECOND_MESSENGERS	Details ...	10	-0.339423	-1.3216	0.14053	0.666086	1	158	tags=70%, list=37%, signal=109%
REACTOME_SIGNALING_BY_INTERLEUKINS	REACTOME_SIGNALING_BY_INTERLEUKINS	Details ...	7	0.408797	1.32423	0.146045	0.590449	1	132	tags=71%, list=31%, signal=102%
REACTOME_CILIUM_ASSEMBLY	REACTOME_CILIUM_ASSEMBLY	Details ...	8	-0.389952	-1.32333	0.151923	0.783142	1	264	tags=100%, list=62%, signal=258%
REACTOME_DEVELOPMENTAL_BIOLOGY	REACTOME_DEVELOPMENTAL_BIOLOGY	Details ...	22	-0.235374	-1.3094	0.152216	0.649391	1	177	tags=64%, list=42%, signal=103%
REACTOME_TRANSPORT_OF_SMALL_MOLECULES	REACTOME_TRANSPORT_OF_SMALL_MOLECULES	Details ...	10	0.341346	1.31538	0.153527	0.568688	1	70	tags=50%, list=16%, signal=58%
REACTOME_METABOLISM_OF_RNA	REACTOME_METABOLISM_OF_RNA	Details ...	12	-0.311594	-1.29485	0.160752	0.640798	1	298	tags=100%, list=70%, signal=323%
REACTOME_SIGNALING_BY_RHO_GTPASES_MIRO_GTPASES_AND_RHOBTB3	REACTOME_SIGNALING_BY_RHO_GTPASES_MIRO_GTPASES_AND_RHOBTB3	Details ...	26	-0.213846	-1.26366	0.181644	0.676898	1	194	tags=65%, list=46%, signal=113%
REACTOME_MEIOSIS	REACTOME_MEIOSIS	Details ...	5	0.445606	1.24977	0.182	0.635892	1	67	tags=60%, list=16%, signal=70%
REACTOME_PRE_NOTCH_EXPRESSION_AND_PROCESSING	REACTOME_PRE_NOTCH_EXPRESSION_AND_PROCESSING	Details ...	5	0.445606	1.25436	0.187251	0.666894	1	67	tags=60%, list=16%, signal=70%
REACTOME_DISEASES_OF_GLYCOSYLATION	REACTOME_DISEASES_OF_GLYCOSYLATION	Details ...	7	-0.379816	-1.23721	0.187747	0.7017	1	207	tags=86%, list=49%, signal=164%
REACTOME_HATS_ACETYLATE_HISTONES	REACTOME_HATS_ACETYLATE_HISTONES	Details ...	5	0.445606	1.24178	0.190283	0.617779	1	67	tags=60%, list=16%, signal=70%
REACTOME_RNA_POLYMERASE_I_PROMOTER_ESCAPE	REACTOME_RNA_POLYMERASE_I_PROMOTER_ESCAPE	Details ...	5	0.445606	1.23581	0.200405	0.596273	1	67	tags=60%, list=16%, signal=70%
REACTOME_GENE_SILENCING_BY_RNA	REACTOME_GENE_SILENCING_BY_RNA		5	0.445606	1.22046	0.207619	0.471666	1	67	tags=60%, list=16%, signal=70%
REACTOME_REPRODUCTION	REACTOME_REPRODUCTION	Details ...	5	0.445606	1.22976	0.213861	0.549818	1	67	tags=60%, list=16%, signal=70%
REACTOME_PROCESSING_OF_DNA_DOUBLE_STRAND_BREAK_ENDS	REACTOME_PROCESSING_OF_DNA_DOUBLE_STRAND_BREAK_ENDS	Details ...	5	0.445606	1.23275	0.216942	0.570694	1	67	tags=60%, list=16%, signal=70%
REACTOME_TRANSCRIPTIONAL_REGULATION_BY_RUNX1	REACTOME_TRANSCRIPTIONAL_REGULATION_BY_RUNX1		5	0.445606	1.22867	0.220619	0.525154	1	67	tags=60%, list=16%, signal=70%
REACTOME_TCF_DEPENDENT_SIGNALING_IN_RESPONSE_TO_WNT	REACTOME_TCF_DEPENDENT_SIGNALING_IN_RESPONSE_TO_WNT		5	0.445606	1.22816	0.227006	0.501794	1	67	tags=60%, list=16%, signal=70%
REACTOME_RHO_GTPASES_ACTIVATE_PKNS	REACTOME_RHO_GTPASES_ACTIVATE_PKNS		5	0.445606	1.22081	0.241905	0.491655	1	67	tags=60%, list=16%, signal=70%
REACTOME_G2_M_CHECKPOINTS	REACTOME_G2_M_CHECKPOINTS		10	0.310096	1.16474	0.259406	0.526583	1	296	tags=100%, list=69%, signal=320%
REACTOME_BASE_EXCISION_REPAIR	REACTOME_BASE_EXCISION_REPAIR		6	0.383333	1.16736	0.263048	0.543468	1	122	tags=67%, list=29%, signal=92%
REACTOME_PLATELET_ACTIVATION_SIGNALING_AND_AGGREGATION	REACTOME_PLATELET_ACTIVATION_SIGNALING_AND_AGGREGATION		7	0.354245	1.13782	0.282209	0.554705	1	94	tags=57%, list=22%, signal=72%
REACTOME_PLATELET_HOMEOSTASIS	REACTOME_PLATELET_HOMEOSTASIS	Details ...	5	-0.40285	-1.13419	0.301653	0.890698	1	87	tags=60%, list=20%, signal=75%
REACTOME_M_PHASE	REACTOME_M_PHASE	Details ...	18	-0.226307	-1.13954	0.306202	0.923846	1	169	tags=61%, list=40%, signal=97%
REACTOME_RHO_GTPASE_EFFECTORS	REACTOME_RHO_GTPASE_EFFECTORS		17	-0.226377	-1.11585	0.311475	0.816641	1	159	tags=59%, list=37%, signal=90%
REACTOME_RHOC_GTPASE_CYCLE	REACTOME_RHOC_GTPASE_CYCLE	Details ...	5	-0.408076	-1.1199	0.313093	0.885931	1	170	tags=80%, list=40%, signal=132%
REACTOME_RHO_GTPASE_CYCLE	REACTOME_RHO_GTPASE_CYCLE		10	-0.291346	-1.11779	0.31643	0.849877	1	178	tags=70%, list=42%, signal=117%
REACTOME_REGULATION_OF_TP53_ACTIVITY	REACTOME_REGULATION_OF_TP53_ACTIVITY		6	-0.366667	-1.08632	0.325103	0.856752	1	131	tags=67%, list=31%, signal=95%
REACTOME_ANTI_INFLAMMATORY_RESPONSE_FAVOURING_LEISHMANIA_PARASITE_INFECTION	REACTOME_ANTI_INFLAMMATORY_RESPONSE_FAVOURING_LEISHMANIA_PARASITE_INFECTION		5	-0.391449	-1.07452	0.336066	0.852191	1	177	tags=80%, list=42%, signal=135%
REACTOME_METABOLISM_OF_AMINO_ACIDS_AND_DERIVATIVES	REACTOME_METABOLISM_OF_AMINO_ACIDS_AND_DERIVATIVES		5	-0.377672	-1.07046	0.341317	0.830096	1	268	tags=100%, list=63%, signal=266%
REACTOME_RNA_POLYMERASE_I_TRANSCRIPTION	REACTOME_RNA_POLYMERASE_I_TRANSCRIPTION		6	0.345238	1.07507	0.347023	0.651848	1	67	tags=50%, list=16%, signal=58%
REACTOME_OXIDATIVE_STRESS_INDUCED_SENESCENCE	REACTOME_OXIDATIVE_STRESS_INDUCED_SENESCENCE		6	0.345238	1.05415	0.358025	0.670885	1	67	tags=50%, list=16%, signal=58%
REACTOME_TELOMERE_MAINTENANCE	REACTOME_TELOMERE_MAINTENANCE		6	0.345238	1.04517	0.377778	0.666702	1	67	tags=50%, list=16%, signal=58%
REACTOME_ESR_MEDIATED_SIGNALING	REACTOME_ESR_MEDIATED_SIGNALING		9	-0.278177	-1.03964	0.381048	0.874135	1	169	tags=67%, list=40%, signal=108%
REACTOME_B_WICH_COMPLEX_POSITIVELY_REGULATES_RRNA_EXPRESSION	REACTOME_B_WICH_COMPLEX_POSITIVELY_REGULATES_RRNA_EXPRESSION		6	0.345238	1.03822	0.385859	0.637975	1	67	tags=50%, list=16%, signal=58%
REACTOME_G2_M_DNA_DAMAGE_CHECKPOINT	REACTOME_G2_M_DNA_DAMAGE_CHECKPOINT		6	0.345238	1.03921	0.39375	0.656508	1	67	tags=50%, list=16%, signal=58%
REACTOME_CELL_CYCLE_MITOTIC	REACTOME_CELL_CYCLE_MITOTIC		29	-0.161817	-1.01788	0.406	0.864445	1	304	tags=86%, list=71%, signal=281%
REACTOME_NEGATIVE_EPIGENETIC_REGULATION_OF_RRNA_EXPRESSION	REACTOME_NEGATIVE_EPIGENETIC_REGULATION_OF_RRNA_EXPRESSION		6	0.345238	1.01977	0.409357	0.653479	1	67	tags=50%, list=16%, signal=58%
REACTOME_S_PHASE	REACTOME_S_PHASE		8	-0.300837	-1.03212	0.411765	0.860959	1	248	tags=88%, list=58%, signal=205%
REACTOME_CLASS_I_MHC_MEDIATED_ANTIGEN_PROCESSING_PRESENTATION	REACTOME_CLASS_I_MHC_MEDIATED_ANTIGEN_PROCESSING_PRESENTATION		6	0.335714	1.0061	0.425577	0.641802	1	213	tags=83%, list=50%, signal=164%
REACTOME_SIGNALING_BY_WNT	REACTOME_SIGNALING_BY_WNT		8	0.282297	0.971884	0.430894	0.632576	1	94	tags=50%, list=22%, signal=63%
REACTOME_ANTIGEN_PROCESSING_UBIQUITINATION_PROTEASOME_DEGRADATION	REACTOME_ANTIGEN_PROCESSING_UBIQUITINATION_PROTEASOME_DEGRADATION		6	0.335714	1.00316	0.433265	0.629347	1	213	tags=83%, list=50%, signal=164%
REACTOME_DNA_DOUBLE_STRAND_BREAK_REPAIR	REACTOME_DNA_DOUBLE_STRAND_BREAK_REPAIR		11	0.249069	1.0092	0.439364	0.654074	1	128	tags=55%, list=30%, signal=76%
REACTOME_SIGNALING_BY_NUCLEAR_RECEPTORS	REACTOME_SIGNALING_BY_NUCLEAR_RECEPTORS		9	-0.278177	-1.00069	0.444444	0.87929	1	169	tags=67%, list=40%, signal=108%
REACTOME_RRNA_PROCESSING	REACTOME_RRNA_PROCESSING		7	-0.307876	-0.994094	0.459302	0.865398	1	298	tags=100%, list=70%, signal=327%
REACTOME_ESTROGEN_DEPENDENT_GENE_EXPRESSION	REACTOME_ESTROGEN_DEPENDENT_GENE_EXPRESSION		7	0.303103	0.978877	0.460606	0.654455	1	298	tags=100%, list=70%, signal=327%
REACTOME_MITOTIC_G1_PHASE_AND_G1_S_TRANSITION	REACTOME_MITOTIC_G1_PHASE_AND_G1_S_TRANSITION		6	-0.321429	-0.968036	0.468927	0.87134	1	292	tags=100%, list=69%, signal=313%
REACTOME_EPIGENETIC_REGULATION_OF_GENE_EXPRESSION	REACTOME_EPIGENETIC_REGULATION_OF_GENE_EXPRESSION		9	-0.270184	-0.971853	0.470703	0.890112	1	125	tags=56%, list=29%, signal=77%
REACTOME_HOMOLOGY_DIRECTED_REPAIR	REACTOME_HOMOLOGY_DIRECTED_REPAIR		11	0.249069	0.976683	0.481262	0.640728	1	128	tags=55%, list=30%, signal=76%
REACTOME_UNWINDING_OF_DNA	REACTOME_UNWINDING_OF_DNA		5	0.339667	0.946501	0.496894	0.66107	1	282	tags=100%, list=66%, signal=292%
REACTOME_RRNA_MODIFICATION_IN_THE_NUCLEUS_AND_CYTOSOL	REACTOME_RRNA_MODIFICATION_IN_THE_NUCLEUS_AND_CYTOSOL		6	-0.307143	-0.920555	0.505859	0.92767	1	298	tags=100%, list=70%, signal=328%
REACTOME_DISEASES_OF_METABOLISM	REACTOME_DISEASES_OF_METABOLISM		11	0.233516	0.927302	0.512195	0.662159	1	57	tags=36%, list=13%, signal=41%
REACTOME_EXTRACELLULAR_MATRIX_ORGANIZATION	REACTOME_EXTRACELLULAR_MATRIX_ORGANIZATION		7	-0.284691	-0.926279	0.533473	0.942674	1	186	tags=71%, list=44%, signal=125%
REACTOME_POSITIVE_EPIGENETIC_REGULATION_OF_RRNA_EXPRESSION	REACTOME_POSITIVE_EPIGENETIC_REGULATION_OF_RRNA_EXPRESSION		7	-0.285032	-0.919232	0.536965	0.904065	1	125	tags=57%, list=29%, signal=80%
REACTOME_METABOLISM_OF_VITAMINS_AND_COFACTORS	REACTOME_METABOLISM_OF_VITAMINS_AND_COFACTORS		5	0.341093	0.93809	0.544922	0.659519	1	111	tags=60%, list=26%, signal=80%
REACTOME_DEPOSITION_OF_NEW_CENPA_CONTAINING_NUCLEOSOMES_AT_THE_CENTROMERE	REACTOME_DEPOSITION_OF_NEW_CENPA_CONTAINING_NUCLEOSOMES_AT_THE_CENTROMERE		7	0.27344	0.900495	0.549801	0.660213	1	67	tags=43%, list=16%, signal=50%
REACTOME_CELL_CYCLE_CHECKPOINTS	REACTOME_CELL_CYCLE_CHECKPOINTS		19	-0.174964	-0.909705	0.558282	0.87387	1	154	tags=53%, list=36%, signal=79%
REACTOME_ADAPTIVE_IMMUNE_SYSTEM	REACTOME_ADAPTIVE_IMMUNE_SYSTEM		10	0.241827	0.901752	0.564054	0.673303	1	154	tags=60%, list=36%, signal=92%
REACTOME_DNA_STRAND_ELONGATION	REACTOME_DNA_STRAND_ELONGATION		6	-0.297619	-0.918473	0.57115	0.880521	1	302	tags=100%, list=71%, signal=339%
REACTOME_HEMOSTASIS	REACTOME_HEMOSTASIS		16	0.192683	0.910407	0.581933	0.67482	1	346	tags=100%, list=81%, signal=513%
REACTOME_DNA_REPLICATION	REACTOME_DNA_REPLICATION		6	-0.297619	-0.904959	0.584179	0.860755	1	302	tags=100%, list=71%, signal=339%
REACTOME_UB_SPECIFIC_PROCESSING_PROTEASES	REACTOME_UB_SPECIFIC_PROCESSING_PROTEASES		5	-0.323991	-0.889179	0.588889	0.871837	1	35	tags=40%, list=8%, signal=43%
REACTOME_INTRACELLULAR_SIGNALING_BY_SECOND_MESSENGERS	REACTOME_INTRACELLULAR_SIGNALING_BY_SECOND_MESSENGERS		10	-0.225962	-0.880973	0.607495	0.867878	1	333	tags=100%, list=78%, signal=447%
REACTOME_MITOTIC_G2_G2_M_PHASES	REACTOME_MITOTIC_G2_G2_M_PHASES		6	-0.292857	-0.874115	0.610338	0.860973	1	304	tags=100%, list=71%, signal=344%
REACTOME_POST_TRANSLATIONAL_PROTEIN_MODIFICATION	REACTOME_POST_TRANSLATIONAL_PROTEIN_MODIFICATION		36	-0.126923	-0.865676	0.62549	0.856908	1	58	tags=25%, list=14%, signal=26%
REACTOME_CELLULAR_SENESCENCE	REACTOME_CELLULAR_SENESCENCE		7	0.27344	0.863498	0.62949	0.705553	1	67	tags=43%, list=16%, signal=50%
REACTOME_SIGNALING_BY_GPCR	REACTOME_SIGNALING_BY_GPCR		6	0.280952	0.861516	0.630522	0.693661	1	94	tags=50%, list=22%, signal=63%
REACTOME_GLYCEROPHOSPHOLIPID_BIOSYNTHESIS	REACTOME_GLYCEROPHOSPHOLIPID_BIOSYNTHESIS		6	-0.276191	-0.837026	0.662214	0.89239	1	240	tags=83%, list=56%, signal=188%
REACTOME_LEISHMANIA_INFECTION	REACTOME_LEISHMANIA_INFECTION		6	-0.257143	-0.792003	0.700397	0.895658	1	177	tags=67%, list=42%, signal=112%
REACTOME_THE_CITRIC_ACID_TCA_CYCLE_AND_RESPIRATORY_ELECTRON_TRANSPORT	REACTOME_THE_CITRIC_ACID_TCA_CYCLE_AND_RESPIRATORY_ELECTRON_TRANSPORT		6	0.264286	0.803003	0.706796	0.771445	1	30	tags=33%, list=7%, signal=35%
REACTOME_TRANSCRIPTIONAL_REGULATION_BY_TP53	REACTOME_TRANSCRIPTIONAL_REGULATION_BY_TP53		18	-0.165033	-0.813713	0.707113	0.915763	1	194	tags=61%, list=46%, signal=107%
REACTOME_REGULATION_OF_LIPID_METABOLISM_BY_PPARALPHA	REACTOME_REGULATION_OF_LIPID_METABOLISM_BY_PPARALPHA		7	-0.242073	-0.801131	0.721881	0.918591	1	143	tags=57%, list=34%, signal=85%
REACTOME_CELLULAR_RESPONSES_TO_EXTERNAL_STIMULI	REACTOME_CELLULAR_RESPONSES_TO_EXTERNAL_STIMULI		13	-0.184392	-0.797819	0.726496	0.904329	1	187	tags=62%, list=44%, signal=106%
REACTOME_DEUBIQUITINATION	REACTOME_DEUBIQUITINATION		9	-0.213429	-0.78047	0.749004	0.895475	1	54	tags=33%, list=13%, signal=37%
REACTOME_INFECTIOUS_DISEASE	REACTOME_INFECTIOUS_DISEASE		16	-0.155183	-0.733623	0.768293	0.930122	1	177	tags=56%, list=42%, signal=93%
REACTOME_TRANSCRIPTIONAL_REGULATION_OF_WHITE_ADIPOCYTE_DIFFERENTIATION	REACTOME_TRANSCRIPTIONAL_REGULATION_OF_WHITE_ADIPOCYTE_DIFFERENTIATION		5	-0.269834	-0.740837	0.81405	0.938972	1	143	tags=60%, list=34%, signal=89%
REACTOME_MEMBRANE_TRAFFICKING	REACTOME_MEMBRANE_TRAFFICKING		10	-0.187019	-0.700924	0.817048	0.920925	1	264	tags=80%, list=62%, signal=205%
REACTOME_PTEN_REGULATION	REACTOME_PTEN_REGULATION		6	-0.233333	-0.702399	0.821429	0.936694	1	329	tags=100%, list=77%, signal=433%
REACTOME_VESICLE_MEDIATED_TRANSPORT	REACTOME_VESICLE_MEDIATED_TRANSPORT		10	-0.187019	-0.710003	0.832323	0.945665	1	264	tags=80%, list=62%, signal=205%
REACTOME_ACTIVATION_OF_ANTERIOR_HOX_GENES_IN_HINDBRAIN_DEVELOPMENT_DURING_EARLY_EMBRYOGENESIS	REACTOME_ACTIVATION_OF_ANTERIOR_HOX_GENES_IN_HINDBRAIN_DEVELOPMENT_DURING_EARLY_EMBRYOGENESIS		9	0.192646	0.698692	0.846626	0.897192	1	108	tags=44%, list=25%, signal=58%
REACTOME_RNA_POLYMERASE_II_TRANSCRIPTION	REACTOME_RNA_POLYMERASE_II_TRANSCRIPTION		42	-0.094122	-0.674323	0.857422	0.936458	1	46	tags=19%, list=11%, signal=19%
REACTOME_PHOSPHOLIPID_METABOLISM	REACTOME_PHOSPHOLIPID_METABOLISM		8	-0.192584	-0.657277	0.887295	0.938851	1	240	tags=75%, list=56%, signal=169%
REACTOME_CHROMATIN_MODIFYING_ENZYMES	REACTOME_CHROMATIN_MODIFYING_ENZYMES		9	0.177458	0.644391	0.90566	0.938154	1	67	tags=33%, list=16%, signal=39%
REACTOME_CHROMOSOME_MAINTENANCE	REACTOME_CHROMOSOME_MAINTENANCE		10	-0.165385	-0.627211	0.919255	0.950281	1	60	tags=30%, list=14%, signal=34%
REACTOME_MUSCLE_CONTRACTION	REACTOME_MUSCLE_CONTRACTION		5	-0.223278	-0.61176	0.922642	0.946553	1	333	tags=100%, list=78%, signal=453%
REACTOME_METABOLISM_OF_LIPIDS	REACTOME_METABOLISM_OF_LIPIDS		21	-0.110406	-0.604194	0.946746	0.935704	1	78	tags=29%, list=18%, signal=33%
REACTOME_DNA_REPAIR	REACTOME_DNA_REPAIR		18	0.111111	0.569047	0.957854	0.976858	1	143	tags=44%, list=34%, signal=64%
REACTOME_SIGNALING_BY_RECEPTOR_TYROSINE_KINASES	REACTOME_SIGNALING_BY_RECEPTOR_TYROSINE_KINASES		8	0.157895	0.550493	0.973896	0.968326	1	359	tags=100%, list=84%, signal=624%
