# Supplementary material for: An organ-on-chip model of pulmonary arterial hypertension identifies a BMPR2-SOX17-prostacyclin signalling axis
Source: Commun Biol. 2022 Nov 7;5:1192. doi: 10.1038/s42003-022-04169-z (PMC9640600; doi:10.1038/s42003-022-04169-z)
Supplement: Supplementary file 13 — Supplementary Data 10 [file 42003_2022_4169_MOESM13_ESM.xlsx]

## Sheet: Adeno.EC.DS
gene

## Sheet: Adeno.SMC.DS
gene

## Sheet: ECFC.EC.DS
gene

## Sheet: ECFC.SMC.DS
gene

## Sheet: IPAH.disgenet
IPAH.disgenet

## Sheet: IPAH.PAECs
IPAH.PAECs

## Sheet: IPAH.PASMCs
IPAH.PASMCs

## Sheet: PAH.disgenet
PAH.disgenet

## Sheet: PAHGenesRabino
PAHGenesRabino
