# Supplementary material for: An organ-on-chip model of pulmonary arterial hypertension identifies a BMPR2-SOX17-prostacyclin signalling axis
Source: Commun Biol. 2022 Nov 7;5:1192. doi: 10.1038/s42003-022-04169-z (PMC9640600; doi:10.1038/s42003-022-04169-z)
Supplement: Supplementary file 14 — Supplementary Data 11 [file 42003_2022_4169_MOESM14_ESM.xlsx]

## Sheet: EC Overlaps
Adeno EC / ECFC EC Overlap	Adeno EC / IPAH PAEC Overlap	ECFC EC / IPAH PAEC Overlap
212 common elements in "ECFC ECs" and "Adeno EC":	33 common elements in "IPAH PAEC" and "Adeno EC":	63 common elements in "IPAH PAEC" and "ECFC EC":
PNPO	AHNAK	ADAM19
MED16	ATP6V1H	ATP5MD
DDAH1	C1R	B3GNT7
NMT1	CCL2	C1R
METAP2	CEBPB	CDK6
KNOP1	COL4A1	CEBPB
PTP4A2	DHH	CEMIP2
RASIP1	ERV3-1	CEP104
LUC7L3	F2RL3	CGNL1
NFIB	GRAP	COL12A1
PABPC1	HERC5	COL6A2
HNRNPC	HTR1B	DHH
ADAMTS1	IFIT3	DNAJB2
TASOR	LOX	DUSP1
NFKBIE	LYSMD2	ELOB
FLI1	MAX	EPHB1
MDM2	MDM2	EXOSC4
ANXA11	NOS3	F2RL3
FLNC	PAM	FBN2
NOP53	PIP5K1C	FDXR
SLC48A1	PKIG	FICD
RRM2	PTPRE	FSTL3
CCDC85B	RAI2	GPRC5B
KLF2	RELN	GTPBP2
TLN1	RET	HES1
RPS2	RHOB	HES4
CEBPB	RNF146	HEY1
OSGIN2	SH2D3C	HOXD1
GIPC1	TMEM167B	HSPA1A
TNFAIP2	TNFRSF21	IER5L
ATOH8	TRAPPC12	ISG20
SLC9A3R2	TSPAN15	JUNB
EDIL3	TUBA1A	KANK3
SHISA5	TIMP3	KIAA0930
ASF1A	TOGARAM1	KITLG
MLLT1	TSPAN13	LAMB2
AAK1	ZNF185	LBH
MIR22HG		MDM2
SQLE		MMP17
HHIP-AS1		MYL9
F2RL3		NAV2
NAP1L1		NFKBIA
ABLIM3		NOS3
RNPEPL1		NRARP
PLOD2		PDZD2
CDCP1		RASSF2
MLLT11		RBM24
ERCC2		RPL21P16
HOXB7		SLC15A3
SDC4		SLC35E1
DDAH2		SOD2
ANGPTL4		SPNS2
RRAS		SULT1A1
NOX4		THY1
UBE4A		TIMP3
TRIM5		TMEFF1
FAN1		TMEM167B
STK11		TOM1L1
EGLN2		TSC22D1
SIPA1		TSPAN13
GPRC5A		TYMP
MYBL2		ZNF117
DYSF		ZNF185
MAGED1
MKNK2
TOP2B
IGF2BP3
ABCB6
SOX17
TRNP1
ZNF622
ADD1
MPRIP
JKAMP
ICAM3
DLGAP1-AS2
LAMA5
DDB1
COPG1
MVD
SMTN
TRIM16L
GTF3C1
OLA1
TNFRSF1A
LIPG
SERINC5
CSF1
FZD4
TNFAIP3
KLF6
KDELR3
LMAN2L
NOB1
SHISA2
DKK2
FLNB
PODXL
NNMT
TMEM54
SKIV2L
PPP1R37
INTS3
NBEAL1
NAP1L5
UBFD1
PTPRB
BTF3
TM2D2
DYNLL1
BMPR2
SFT2D3
IARS1
THEMIS2
ADAMTS4
IGBP1
TMEM30A
ID1
SLC30A5
SLC12A4
SYNPO
GALNT7
DPYSL3
PFN2
TMEM250
IKBKE
DNAJB4
SEPTIN9
PRPF8
IFIT2
KIF1C
C8orf82
GRB14
PLEKHA1
P4HA2
THADA
PNMA1
MIR31HG
FST
LIX1L
CLCN3
SPOCK1
CCDC50
NOS3
TTLL12
NACA
RGS4
WASF1
SLC39A14
SWAP70
ATP8B2
SHC1
SLC38A2
CPT1A
SS18
SSBP2
TMEM167B
TADA3
ILF2
RALB
CDKN2A
PLXND1
GNL3L
LRP11
PAFAH2
THBD
CDC42EP2
TBC1D10A
MALL
DYNC1I2
SLC35A5
FTX
IRF6
ACOT11
DKK1
ZNF561
CALHM2
BTBD19
DHX32
POLDIP3
CFAP410
NUDCD3
C15orf54
CTDSP1
SNHG7
SLC18B1
TMEM154
NAV3
DDX11
MAP7D1
RACK1
MYOF
CRACD
STMP1
TTLL4
HDDC3
FAM114A1
EIF3A
C1R
SNTB2
DIAPH3
POLD4
TNIK
PTTG1
SH3TC1
NDUFC1
RHOBTB3
DIPK1B
ITGAV
TRIM38
DHH
TRAPPC8

## Sheet: SMC Overlaps
Adeno SMC / ECFC SMC Overlap	Adeno SMC / IPAH PASMC Overlap	ECFC SMC / IPAH PASMC Overlap
94 common elements in "ECFC SMCs" and "Adeno SMCs":	76 common elements in "Adeno SMCs" and "IPAH PASMCs":	86 common elements in "ECFC SMCs" and "IPAH PASMCs":
ENO2	ENO2	XACT
C15orf48	ZNF395	ISG15
EEF1A2	ALDOC	DOCK10
DARS1	MSMO1	ENO2
TULP4	QPRT	IFITM1
MCM6	FADS2	SAMHD1
BNIP3	ITPR1	INCENP
IFIT3	MIR210HG	IFIT3
TIGAR	FDFT1	BRCA2
LDHA	PSAT1	CDCA5
GBE1	H2AC6	PLA2G4C
PCDH9	IDI1	KIF11
H2BC5	NPTXR	ARHGAP11A
ZNF395	DHCR7	ZNF395
VEPH1	YEATS2	PFKFB4
PFKFB4	STEAP2	KIF4A
ALPK2	SMG1P5	NCAPG
BCLAF1	PTGIS	DTL
DTL	MFAP4	ASF1B
PPP1R13L	PDK1	APOBEC3B
ALDOC	IFITM3	IFI6
PLIN2	ACAT2	IQGAP3
ARMH4	MVD	ALDOC
PDE4C	KIF14	ANKZF1
SLC16A3	H2AZ1	NASP
LUCAT1	FMOD	IFIT1
EGLN1	SPAG4	MAD2L1
THEMIS2	SLC7A5	NCAPD3
CTPS1	FECH	CCNA2
FEN1	PFKFB4	ITGA6
CCN2	PIK3C3	FEN1
ITPR3	FEN1	SHCBP1
FKBP14	ACOT1	TMPO
ZNF516	H6PD	GASK1B
GYS1	VEGFA	ESCO2
CA9	CHURC1	PBK
RAB3D	ASNS	RAD51AP1
NOL6	SSPN	DLGAP5
GPI	CD68	LY6E
NCDN	GLMP	TIMELESS
NDRG1	NPTX1	CEP55
PMM2	CAPG	PARPBP
ARL10	HSPA1B	PKNOX2
PGM1	RARRES2	UHRF1
ADAP1	ACE	ZWINT
MYBBP1A	RSPO3	DCP2
LMNB2	SLC2A1	IFI27
ZNF581	NDUFA4L2	KIF24
ADAM19	MYBL2	CDK1
NUDT3	SMC5	LMNB2
MAFB	CIP2A	EPM2AIP1
ACVR2B	DTL	BBS4
INKA2	KPNA2	CKAP2L
FBXW4	IFIT3	CDC45
IFITM3	POLD4	POC1A
EDN1	SLC22A23	SKA1
RRAGD	NADK	NEIL3
STX17	GABBR1	IFITM3
SEC23IP	CRISPLD2	CENPW
BNIP3L	MTFP1	GOLIM4
AIMP2	SMN2	HTRA3
RHOJ	MT1M	H4C15
MIR210HG	HCG11	CDC25C
TPI1	ABCA3	AURKB
TSPAN9	TET3	IFT57
IFIH1	GPX3	MIR210HG
KIF14	KIFC2	KIF14
PCYT2	SQLE	ZNF276
IL36B	RASL10B	SHISAL1
DLC1	KIF20B	GINS1
IFRD2	PHETA2	SMC5
SMC5	CENPJ	OTUD3
TCAF2	ZNF471	KNL1
AHNAK2	EME2	TRIP13
HNRNPAB	LMNB2	KIAA0586
INTS7	IFITM2	SPRED3
PPP1R13B		ITPR1
IL36RN		PCLAF
WWTR1		TOP2A
C1QTNF5		BIRC5
DKC1		IL32
TRIM69		POLQ
FUT11		GINS2
XYLT1		GTSE1
ABHD11		PARP1
LTBP2		ZNF236
PLAU
ITPR1
TMEM233
RAB13
GPR1
MXI1
NARF
AK4
