# Supplementary material for: An organ-on-chip model of pulmonary arterial hypertension identifies a BMPR2-SOX17-prostacyclin signalling axis
Source: Commun Biol. 2022 Nov 7;5:1192. doi: 10.1038/s42003-022-04169-z (PMC9640600; doi:10.1038/s42003-022-04169-z)
Supplement: Supplementary file 15 — Supplementary Data 12 [file 42003_2022_4169_MOESM15_ESM.xlsx]

## Sheet: Adeno EC x ECFC EC Overlap
Overlap Results
Collection(s):	H
# overlaps shown:	22
# genesets in collections:	50
# genes in comparison (n):	212
# genes in universe (N):	40312
Gene Set Name	# Genes in Gene Set (K)	Description	# Genes in Overlap (k)	k/K	p-value	FDR q-value
HALLMARK_EPITHELIAL_MESENCHYMAL_TRANSITION	200	Genes defining epithelial-mesenchymal transition, as in wound healing, fibrosis and metastasis.	11	0.055	1.07e-08	5.34e-07
HALLMARK_TNFA_SIGNALING_VIA_NFKB	200	Genes regulated by NF-kB in response to TNF [GeneID=7124].	10	0.05	1.23e-07	3.08e-06
HALLMARK_E2F_TARGETS	200	Genes encoding cell cycle related targets of E2F transcription factors.	8	0.04	1.19e-05	0.000199
HALLMARK_IL2_STAT5_SIGNALING	199	Genes up-regulated by STAT5 in response to IL2 stimulation.	7	0.0352	9.47e-05	0.000977
HALLMARK_MYC_TARGETS_V1	200	A subgroup of genes regulated by MYC - version 1 (v1).	7	0.035	9.77e-05	0.000977
HALLMARK_UNFOLDED_PROTEIN_RESPONSE	113	Genes up-regulated during unfolded protein response, a cellular stress response related to the endoplasmic reticulum.	5	0.0442	0.00034	0.00283
HALLMARK_HYPOXIA	200	Genes up-regulated in response to low oxygen levels (hypoxia).	6	0.03	0.000697	0.00498
HALLMARK_MITOTIC_SPINDLE	199	Genes important for mitotic spindle assembly.	5	0.0251	0.00416	0.0193
HALLMARK_GLYCOLYSIS	200	Genes encoding proteins involved in glycolysis and gluconeogenesis.	5	0.025	0.00425	0.0193
HALLMARK_MTORC1_SIGNALING	200	Genes up-regulated through activation of mTORC1 complex.	5	0.025	0.00425	0.0193
HALLMARK_XENOBIOTIC_METABOLISM	200	Genes encoding proteins involved in processing of drugs and other xenobiotics.	5	0.025	0.00425	0.0193
HALLMARK_UV_RESPONSE_DN	144	Genes down-regulated in response to ultraviolet (UV) radiation.	4	0.0278	0.0072	0.03
HALLMARK_INTERFERON_ALPHA_RESPONSE	97	Genes up-regulated in response to alpha interferon proteins.	3	0.0309	0.0147	0.0492
HALLMARK_ANGIOGENESIS	36	Genes up-regulated during formation of blood vessels (angiogenesis).	2	0.0556	0.0154	0.0492
HALLMARK_ANDROGEN_RESPONSE	100	Genes defining response to androgens.	3	0.03	0.016	0.0492
HALLMARK_PI3K_AKT_MTOR_SIGNALING	105	Genes up-regulated by activation of the PI3K/AKT/mTOR pathway.	3	0.0286	0.0182	0.0492
HALLMARK_APICAL_JUNCTION	200	Genes encoding components of apical junction complex.	4	0.02	0.0217	0.0492
HALLMARK_ESTROGEN_RESPONSE_EARLY	200	Genes defining early response to estrogen.	4	0.02	0.0217	0.0492
HALLMARK_G2M_CHECKPOINT	200	Genes involved in the G2/M checkpoint, as in progression through the cell division cycle.	4	0.02	0.0217	0.0492
HALLMARK_HEME_METABOLISM	200	Genes involved in metabolism of heme (a cofactor consisting of iron and porphyrin) and erythroblast differentiation.	4	0.02	0.0217	0.0492
HALLMARK_INTERFERON_GAMMA_RESPONSE	200	Genes up-regulated in response to IFNG [GeneID=3458].	4	0.02	0.0217	0.0492
HALLMARK_P53_PATHWAY	200	Genes involved in p53 pathways and networks.	4	0.02	0.0217	0.0492
Overlap Results
Collection(s):	CP:KEGG
# overlaps shown:	3
# genesets in collections:	186
# genes in comparison (n):	212
# genes in universe (N):	40312
Gene Set Name	# Genes in Gene Set (K)	Description	# Genes in Overlap (k)	k/K	p-value	FDR q-value
KEGG_ADIPOCYTOKINE_SIGNALING_PATHWAY	67	Adipocytokine signaling pathway	4	0.0597	0.00044	0.0421
KEGG_P53_SIGNALING_PATHWAY	68	p53 signaling pathway	4	0.0588	0.000465	0.0421
KEGG_FOCAL_ADHESION	199	Focal adhesion	6	0.0302	0.000679	0.0421
Overlap Results
Collection(s):	CP:REACTOME
# overlaps shown:	5
# genesets in collections:	1604
# genes in comparison (n):	212
# genes in universe (N):	40312
Gene Set Name	# Genes in Gene Set (K)	Description	# Genes in Overlap (k)	k/K	p-value	FDR q-value
REACTOME_POST_TRANSLATIONAL_PROTEIN_MODIFICATION	1435	Post-translational protein modification	23	0.016	2.36e-06	0.00378
REACTOME_IRE1ALPHA_ACTIVATES_CHAPERONES	50	IRE1alpha activates chaperones	5	0.1	6.71e-06	0.00516
REACTOME_UNFOLDED_PROTEIN_RESPONSE_UPR	92	Unfolded Protein Response (UPR)	6	0.0652	9.64e-06	0.00516
REACTOME_ENOS_ACTIVATION	11	eNOS activation	3	0.2727	2.29e-05	0.0092
REACTOME_METABOLISM_OF_NITRIC_OXIDE_NOS3_ACTIVATION_AND_REGULATION	15	Metabolism of nitric oxide: NOS3 activation and regulation	3	0.2	6.23e-05	0.02

## Sheet: Adeno EC x IPAH PAEC Overlap
Overlap Results
Collection(s):	H
# overlaps shown:	16
# genesets in collections:	50
# genes in comparison (n):	37
# genes in universe (N):	40312
Gene Set Name	# Genes in Gene Set (K)	Description	# Genes in Overlap (k)	k/K	p-value	FDR q-value
HALLMARK_EPITHELIAL_MESENCHYMAL_TRANSITION	200	Genes defining epithelial-mesenchymal transition, as in wound healing, fibrosis and metastasis.	4	0.02	3.42e-05	0.000569
HALLMARK_INTERFERON_GAMMA_RESPONSE	200	Genes up-regulated in response to IFNG [GeneID=3458].	4	0.02	3.42e-05	0.000569
HALLMARK_TNFA_SIGNALING_VIA_NFKB	200	Genes regulated by NF-kB in response to TNF [GeneID=7124].	4	0.02	3.42e-05	0.000569
HALLMARK_IL2_STAT5_SIGNALING	199	Genes up-regulated by STAT5 in response to IL2 stimulation.	3	0.0151	0.000814	0.0102
HALLMARK_PROTEIN_SECRETION	96	Genes involved in protein secretion pathway.	2	0.0208	0.00354	0.0354
HALLMARK_UNFOLDED_PROTEIN_RESPONSE	113	Genes up-regulated during unfolded protein response, a cellular stress response related to the endoplasmic reticulum.	2	0.0177	0.00487	0.0405
HALLMARK_COAGULATION	138	Genes encoding components of blood coagulation system; also up-regulated in platelets.	2	0.0145	0.00716	0.0455
HALLMARK_UV_RESPONSE_UP	158	Genes up-regulated in response to ultraviolet (UV) radiation.	2	0.0127	0.00929	0.0455
HALLMARK_APOPTOSIS	161	Genes mediating programmed cell death (apoptosis) by activation of caspases.	2	0.0124	0.00963	0.0455
HALLMARK_COMPLEMENT	200	Genes encoding components of the complement system, which is part of the innate immune system.	2	0.01	0.0146	0.0455
HALLMARK_ESTROGEN_RESPONSE_EARLY	200	Genes defining early response to estrogen.	2	0.01	0.0146	0.0455
HALLMARK_ESTROGEN_RESPONSE_LATE	200	Genes defining late response to estrogen.	2	0.01	0.0146	0.0455
HALLMARK_HYPOXIA	200	Genes up-regulated in response to low oxygen levels (hypoxia).	2	0.01	0.0146	0.0455
HALLMARK_INFLAMMATORY_RESPONSE	200	Genes defining inflammatory response.	2	0.01	0.0146	0.0455
HALLMARK_KRAS_SIGNALING_UP	200	Genes up-regulated by KRAS activation.	2	0.01	0.0146	0.0455
HALLMARK_P53_PATHWAY	200	Genes involved in p53 pathways and networks.	2	0.01	0.0146	0.0455
Overlap Results
Collection(s):	CP:KEGG
# overlaps shown:	1
# genesets in collections:	186
# genes in comparison (n):	37
# genes in universe (N):	40312
Gene Set Name	# Genes in Gene Set (K)	Description	# Genes in Overlap (k)	k/K	p-value	FDR q-value
KEGG_PATHWAYS_IN_CANCER	325	Pathways in cancer	4	0.0123	0.000222	0.0413
Overlap Results
Collection(s):	CP:REACTOME
# overlaps shown:	2
# genesets in collections:	1604
# genes in comparison (n):	37
# genes in universe (N):	40312
Gene Set Name	# Genes in Gene Set (K)	Description	# Genes in Overlap (k)	k/K	p-value	FDR q-value
REACTOME_DEVELOPMENTAL_BIOLOGY	1143	Developmental Biology	8	0.007	7.57e-06	0.011
REACTOME_NERVOUS_SYSTEM_DEVELOPMENT	580	Nervous system development	6	0.0103	1.38e-05	0.011

## Sheet: ECFC EC x IPAH PAEC Overlap
Overlap Results
Collection(s):	H
# overlaps shown:	11
# genesets in collections:	50
# genes in comparison (n):	63
# genes in universe (N):	40312
Gene Set Name	# Genes in Gene Set (K)	Description	# Genes in Overlap (k)	k/K	p-value	FDR q-value
HALLMARK_EPITHELIAL_MESENCHYMAL_TRANSITION	200	Genes defining epithelial-mesenchymal transition, as in wound healing, fibrosis and metastasis.	7	0.035	2.91e-08	7.28e-07
HALLMARK_TNFA_SIGNALING_VIA_NFKB	200	Genes regulated by NF-kB in response to TNF [GeneID=7124].	7	0.035	2.91e-08	7.28e-07
HALLMARK_HEDGEHOG_SIGNALING	36	Genes up-regulated by activation of hedgehog signaling.	3	0.0833	2.5e-05	0.000417
HALLMARK_UV_RESPONSE_UP	158	Genes up-regulated in response to ultraviolet (UV) radiation.	4	0.0253	0.000113	0.00122
HALLMARK_APOPTOSIS	161	Genes mediating programmed cell death (apoptosis) by activation of caspases.	4	0.0248	0.000122	0.00122
HALLMARK_INTERFERON_GAMMA_RESPONSE	200	Genes up-regulated in response to IFNG [GeneID=3458].	4	0.02	0.000279	0.00232
HALLMARK_REACTIVE_OXYGEN_SPECIES_PATHWAY	49	Genes up-regulated by reactive oxigen species (ROS).	2	0.0408	0.0027	0.0192
HALLMARK_COMPLEMENT	200	Genes encoding components of the complement system, which is part of the innate immune system.	3	0.015	0.00384	0.0192
HALLMARK_ESTROGEN_RESPONSE_EARLY	200	Genes defining early response to estrogen.	3	0.015	0.00384	0.0192
HALLMARK_P53_PATHWAY	200	Genes involved in p53 pathways and networks.	3	0.015	0.00384	0.0192
HALLMARK_ANDROGEN_RESPONSE	100	Genes defining response to androgens.	2	0.02	0.0108	0.049
Overlap Results
Collection(s):	CP:KEGG
# overlaps shown:	3
# genesets in collections:	186
# genes in comparison (n):	63
# genes in universe (N):	40312
Gene Set Name	# Genes in Gene Set (K)	Description	# Genes in Overlap (k)	k/K	p-value	FDR q-value
KEGG_PATHWAYS_IN_CANCER	325	Pathways in cancer	6	0.0185	1.21e-05	0.00225
KEGG_CHRONIC_MYELOID_LEUKEMIA	73	Chronic myeloid leukemia	3	0.0411	0.000209	0.0195
KEGG_SMALL_CELL_LUNG_CANCER	84	Small cell lung cancer	3	0.0357	0.000317	0.0196
Overlap Results
Collection(s):	CP:REACTOME
# overlaps shown:	3
# genesets in collections:	1604
# genes in comparison (n):	63
# genes in universe (N):	40312
Gene Set Name	# Genes in Gene Set (K)	Description	# Genes in Overlap (k)	k/K	p-value	FDR q-value
REACTOME_EXTRACELLULAR_MATRIX_ORGANIZATION	301	Extracellular matrix organization	6	0.0199	7.84e-06	0.0126
REACTOME_DEVELOPMENTAL_BIOLOGY	1143	Developmental Biology	9	0.0079	6.87e-05	0.0379
REACTOME_DEGRADATION_OF_THE_EXTRACELLULAR_MATRIX	140	Degradation of the extracellular matrix	4	0.0286	7.08e-05	0.0379
