# Supplementary material for: An organ-on-chip model of pulmonary arterial hypertension identifies a BMPR2-SOX17-prostacyclin signalling axis
Source: Commun Biol. 2022 Nov 7;5:1192. doi: 10.1038/s42003-022-04169-z (PMC9640600; doi:10.1038/s42003-022-04169-z)
Supplement: Supplementary file 16 — Supplementary Data 13 [file 42003_2022_4169_MOESM16_ESM.xlsx]

## Sheet: Adeno SMC x ECFC SMC Overlap
Overlap Results
Collection(s):	H
# overlaps shown:	14
# genesets in collections:	50
# genes in comparison (n):	94
# genes in universe (N):	40312
Gene Set Name	# Genes in Gene Set (K)	Description	# Genes in Overlap (k)	k/K	p-value	FDR q-value
HALLMARK_HYPOXIA	200	Genes up-regulated in response to low oxygen levels (hypoxia).	15	0.075	1.05e-18	5.25e-17
HALLMARK_GLYCOLYSIS	200	Genes encoding proteins involved in glycolysis and gluconeogenesis.	9	0.045	1.12e-09	2.81e-08
HALLMARK_MTORC1_SIGNALING	200	Genes up-regulated through activation of mTORC1 complex.	6	0.03	7.84e-06	0.000131
HALLMARK_IL2_STAT5_SIGNALING	199	Genes up-regulated by STAT5 in response to IL2 stimulation.	5	0.0251	0.000107	0.00134
HALLMARK_MYC_TARGETS_V1	200	A subgroup of genes regulated by MYC - version 1 (v1).	4	0.02	0.00127	0.0127
HALLMARK_INTERFERON_ALPHA_RESPONSE	97	Genes up-regulated in response to alpha interferon proteins.	3	0.0309	0.00154	0.0129
HALLMARK_APOPTOSIS	161	Genes mediating programmed cell death (apoptosis) by activation of caspases.	3	0.0186	0.00643	0.0445
HALLMARK_TGF_BETA_SIGNALING	54	Genes up-regulated in response to TGFB1 [GeneID=7040].	2	0.037	0.00711	0.0445
HALLMARK_MYC_TARGETS_V2	58	A subgroup of genes regulated by MYC - version 2 (v2).	2	0.0345	0.00817	0.0446
HALLMARK_ADIPOGENESIS	200	Genes up-regulated during adipocyte differentiation (adipogenesis).	3	0.015	0.0116	0.0446
HALLMARK_HEME_METABOLISM	200	Genes involved in metabolism of heme (a cofactor consisting of iron and porphyrin) and erythroblast differentiation.	3	0.015	0.0116	0.0446
HALLMARK_INTERFERON_GAMMA_RESPONSE	200	Genes up-regulated in response to IFNG [GeneID=3458].	3	0.015	0.0116	0.0446
HALLMARK_TNFA_SIGNALING_VIA_NFKB	200	Genes regulated by NF-kB in response to TNF [GeneID=7124].	3	0.015	0.0116	0.0446
HALLMARK_CHOLESTEROL_HOMEOSTASIS	74	Genes involved in cholesterol homeostasis.	2	0.027	0.013	0.0465
Overlap Results
Collection(s):	CP:KEGG
# overlaps shown:	5
# genesets in collections:	186
# genes in comparison (n):	94
# genes in universe (N):	40312
Gene Set Name	# Genes in Gene Set (K)	Description	# Genes in Overlap (k)	k/K	p-value	FDR q-value
KEGG_GLYCOLYSIS_GLUCONEOGENESIS	62	Glycolysis / Gluconeogenesis	6	0.0968	7.56e-09	1.41e-06
KEGG_FRUCTOSE_AND_MANNOSE_METABOLISM	34	Fructose and mannose metabolism	4	0.1176	1.22e-06	0.000113
KEGG_STARCH_AND_SUCROSE_METABOLISM	52	Starch and sucrose metabolism	4	0.0769	6.89e-06	0.000427
KEGG_PENTOSE_PHOSPHATE_PATHWAY	27	Pentose phosphate pathway	3	0.1111	3.45e-05	0.0016
KEGG_AMINO_SUGAR_AND_NUCLEOTIDE_SUGAR_METABOLISM	44	Amino sugar and nucleotide sugar metabolism	3	0.0682	0.000152	0.00564
Overlap Results
Collection(s):	CP:REACTOME
# overlaps shown:	12
# genesets in collections:	1604
# genes in comparison (n):	94
# genes in universe (N):	40312
Gene Set Name	# Genes in Gene Set (K)	Description	# Genes in Overlap (k)	k/K	p-value	FDR q-value
REACTOME_METABOLISM_OF_CARBOHYDRATES	293	Metabolism of carbohydrates	10	0.0341	1.86e-09	2.99e-06
REACTOME_GLYCOLYSIS	72	Glycolysis	5	0.0694	7.66e-07	0.000614
REACTOME_GLUCONEOGENESIS	34	Gluconeogenesis	4	0.1176	1.22e-06	0.000651
REACTOME_GLUCOSE_METABOLISM	92	Glucose metabolism	5	0.0543	2.59e-06	0.00104
REACTOME_GLYCOGEN_SYNTHESIS	16	Glycogen synthesis	3	0.1875	6.73e-06	0.00216
REACTOME_TRANSCRIPTIONAL_REGULATION_BY_TP53	363	Transcriptional Regulation by TP53	7	0.0193	2.37e-05	0.00633
REACTOME_GLYCOGEN_METABOLISM	27	Glycogen metabolism	3	0.1111	3.45e-05	0.0079
REACTOME_INTERLEUKIN_36_PATHWAY	7	Interleukin-36 pathway	2	0.2857	0.000112	0.0225
REACTOME_RUNX3_REGULATES_YAP1_MEDIATED_TRANSCRIPTION	8	RUNX3 regulates YAP1-mediated transcription	2	0.25	0.000149	0.0243
REACTOME_TP53_REGULATES_TRANSCRIPTION_OF_CELL_DEATH_GENES	44	TP53 Regulates Transcription of Cell Death Genes	3	0.0682	0.000152	0.0243
REACTOME_CLEC7A_DECTIN_1_INDUCES_NFAT_ACTIVATION	11	CLEC7A (Dectin-1) induces NFAT activation	2	0.1818	0.000292	0.0426
REACTOME_RNA_POLYMERASE_II_TRANSCRIPTION	1374	RNA Polymerase II Transcription	11	0.008	0.00036	0.0481

## Sheet: Adeno SMC x IPAH PASMC Overlap
Overlap Results
Collection(s):	H
# overlaps shown:	20
# genesets in collections:	50
# genes in comparison (n):	76
# genes in universe (N):	40312
Gene Set Name	# Genes in Gene Set (K)	Description	# Genes in Overlap (k)	k/K	p-value	FDR q-value
HALLMARK_CHOLESTEROL_HOMEOSTASIS	74	Genes involved in cholesterol homeostasis.	8	0.1081	1.49e-12	7.45e-11
HALLMARK_MTORC1_SIGNALING	200	Genes up-regulated through activation of mTORC1 complex.	9	0.045	1.63e-10	4.06e-09
HALLMARK_G2M_CHECKPOINT	200	Genes involved in the G2/M checkpoint, as in progression through the cell division cycle.	6	0.03	2.27e-06	3.78e-05
HALLMARK_UV_RESPONSE_UP	158	Genes up-regulated in response to ultraviolet (UV) radiation.	5	0.0316	1.28e-05	0.00016
HALLMARK_ESTROGEN_RESPONSE_EARLY	200	Genes defining early response to estrogen.	5	0.025	3.97e-05	0.000331
HALLMARK_HYPOXIA	200	Genes up-regulated in response to low oxygen levels (hypoxia).	5	0.025	3.97e-05	0.000331
HALLMARK_UNFOLDED_PROTEIN_RESPONSE	113	Genes up-regulated during unfolded protein response, a cellular stress response related to the endoplasmic reticulum.	4	0.0354	6.43e-05	0.000459
HALLMARK_FATTY_ACID_METABOLISM	158	Genes encoding proteins involved in metabolism of fatty acids.	4	0.0253	0.000234	0.00146
HALLMARK_EPITHELIAL_MESENCHYMAL_TRANSITION	200	Genes defining epithelial-mesenchymal transition, as in wound healing, fibrosis and metastasis.	4	0.02	0.000571	0.00259
HALLMARK_ESTROGEN_RESPONSE_LATE	200	Genes defining late response to estrogen.	4	0.02	0.000571	0.00259
HALLMARK_INTERFERON_GAMMA_RESPONSE	200	Genes up-regulated in response to IFNG [GeneID=3458].	4	0.02	0.000571	0.00259
HALLMARK_INTERFERON_ALPHA_RESPONSE	97	Genes up-regulated in response to alpha interferon proteins.	3	0.0309	0.000836	0.00348
HALLMARK_BILE_ACID_METABOLISM	112	Genes involve in metabolism of bile acids and salts.	3	0.0268	0.00127	0.00487
HALLMARK_APOPTOSIS	161	Genes mediating programmed cell death (apoptosis) by activation of caspases.	3	0.0186	0.00355	0.0127
HALLMARK_ADIPOGENESIS	200	Genes up-regulated during adipocyte differentiation (adipogenesis).	3	0.015	0.00648	0.0171
HALLMARK_E2F_TARGETS	200	Genes encoding cell cycle related targets of E2F transcription factors.	3	0.015	0.00648	0.0171
HALLMARK_GLYCOLYSIS	200	Genes encoding proteins involved in glycolysis and gluconeogenesis.	3	0.015	0.00648	0.0171
HALLMARK_HEME_METABOLISM	200	Genes involved in metabolism of heme (a cofactor consisting of iron and porphyrin) and erythroblast differentiation.	3	0.015	0.00648	0.0171
HALLMARK_MYOGENESIS	200	Genes involved in development of skeletal muscle (myogenesis).	3	0.015	0.00648	0.0171
HALLMARK_PI3K_AKT_MTOR_SIGNALING	105	Genes up-regulated by activation of the PI3K/AKT/mTOR pathway.	2	0.019	0.0169	0.0422
Overlap Results
Collection(s):	CP:KEGG
# overlaps shown:	8
# genesets in collections:	186
# genes in comparison (n):	76
# genes in universe (N):	40312
Gene Set Name	# Genes in Gene Set (K)	Description	# Genes in Overlap (k)	k/K	p-value	FDR q-value
KEGG_STEROID_BIOSYNTHESIS	17	Steroid biosynthesis	4	0.2353	2.72e-08	5.07e-06
KEGG_TERPENOID_BACKBONE_BIOSYNTHESIS	15	Terpenoid backbone biosynthesis	3	0.2	2.88e-06	0.000268
KEGG_BIOSYNTHESIS_OF_UNSATURATED_FATTY_ACIDS	22	Biosynthesis of unsaturated fatty acids	2	0.0909	0.000791	0.0438
KEGG_NICOTINATE_AND_NICOTINAMIDE_METABOLISM	24	Nicotinate and nicotinamide metabolism	2	0.0833	0.000942	0.0438
KEGG_PENTOSE_PHOSPHATE_PATHWAY	27	Pentose phosphate pathway	2	0.0741	0.00119	0.0444
KEGG_FRUCTOSE_AND_MANNOSE_METABOLISM	34	Fructose and mannose metabolism	2	0.0588	0.00189	0.0493
KEGG_BASE_EXCISION_REPAIR	35	Base excision repair	2	0.0571	0.002	0.0493
KEGG_DNA_REPLICATION	36	DNA replication	2	0.0556	0.00212	0.0493
Overlap Results
Collection(s):	CP:REACTOME
# overlaps shown:	25
# genesets in collections:	1604
# genes in comparison (n):	76
# genes in universe (N):	40312
Gene Set Name	# Genes in Gene Set (K)	Description	# Genes in Overlap (k)	k/K	p-value	FDR q-value
REACTOME_CHOLESTEROL_BIOSYNTHESIS	25	Cholesterol biosynthesis	7	0.28	2.98e-14	4.78e-11
REACTOME_METABOLISM_OF_STEROIDS	151	Metabolism of steroids	8	0.053	4.89e-10	3.92e-07
REACTOME_ACTIVATION_OF_GENE_EXPRESSION_BY_SREBF_SREBP	42	Activation of gene expression by SREBF (SREBP)	5	0.119	1.68e-08	8.97e-06
REACTOME_REGULATION_OF_CHOLESTEROL_BIOSYNTHESIS_BY_SREBP_SREBF	55	Regulation of cholesterol biosynthesis by SREBP (SREBF)	5	0.0909	6.73e-08	2.7e-05
REACTOME_METABOLISM_OF_LIPIDS	741	Metabolism of lipids	11	0.0148	1.46e-07	4.67e-05
REACTOME_DNA_REPAIR	332	DNA Repair	7	0.0211	3.24e-06	0.000866
REACTOME_BASE_EXCISION_REPAIR	91	Base Excision Repair	4	0.044	2.75e-05	0.00559
REACTOME_NICOTINATE_METABOLISM	31	Nicotinate metabolism	3	0.0968	2.79e-05	0.00559
REACTOME_TELOMERE_MAINTENANCE	113	Telomere Maintenance	4	0.0354	6.43e-05	0.0115
REACTOME_METABOLISM_OF_WATER_SOLUBLE_VITAMINS_AND_COFACTORS	123	Metabolism of water-soluble vitamins and cofactors	4	0.0325	8.93e-05	0.0143
REACTOME_CHROMOSOME_MAINTENANCE	140	Chromosome Maintenance	4	0.0286	0.000147	0.0215
REACTOME_METABOLISM_OF_CARBOHYDRATES	293	Metabolism of carbohydrates	5	0.0171	0.000238	0.0318
REACTOME_DNA_DOUBLE_STRAND_BREAK_REPAIR	167	DNA Double-Strand Break Repair	4	0.024	0.000289	0.0355
REACTOME_GLYCOLYSIS	72	Glycolysis	3	0.0417	0.00035	0.0355
REACTOME_PROCESSIVE_SYNTHESIS_ON_THE_LAGGING_STRAND	15	Processive synthesis on the lagging strand	2	0.1333	0.000362	0.0355
REACTOME_INTERFERON_ALPHA_BETA_SIGNALING	73	Interferon alpha/beta signaling	3	0.0411	0.000364	0.0355
REACTOME_CELLULAR_RESPONSES_TO_EXTERNAL_STIMULI	706	Cellular responses to external stimuli	7	0.0099	0.000377	0.0355
REACTOME_METABOLISM_OF_VITAMINS_AND_COFACTORS	189	Metabolism of vitamins and cofactors	4	0.0212	0.000461	0.0411
REACTOME_PROCESSIVE_SYNTHESIS_ON_THE_C_STRAND_OF_THE_TELOMERE	19	Processive synthesis on the C-strand of the telomere	2	0.1053	0.000587	0.0461
REACTOME_VEGFR2_MEDIATED_CELL_PROLIFERATION	19	VEGFR2 mediated cell proliferation	2	0.1053	0.000587	0.0461
REACTOME_INTERFERON_SIGNALING	203	Interferon Signaling	4	0.0197	0.000603	0.0461
REACTOME_LAGGING_STRAND_SYNTHESIS	20	Lagging Strand Synthesis	2	0.1	0.000652	0.0462
REACTOME_CELL_CYCLE_MITOTIC	561	Cell Cycle, Mitotic	6	0.0107	0.000678	0.0462
REACTOME_GLUCOSE_METABOLISM	92	Glucose metabolism	3	0.0326	0.000717	0.0462
REACTOME_PCNA_DEPENDENT_LONG_PATCH_BASE_EXCISION_REPAIR	21	PCNA-Dependent Long Patch Base Excision Repair	2	0.0952	0.00072	0.0462

## Sheet: ECFC SMC x IPAH PASMC Overlap
Overlap Results
Collection(s):	H
# overlaps shown:	7
# genesets in collections:	50
# genes in comparison (n):	86
# genes in universe (N):	40312
Gene Set Name	# Genes in Gene Set (K)	Description	# Genes in Overlap (k)	k/K	p-value	FDR q-value
HALLMARK_G2M_CHECKPOINT	200	Genes involved in the G2/M checkpoint, as in progression through the cell division cycle.	17	0.085	9.86e-23	4.93e-21
HALLMARK_E2F_TARGETS	200	Genes encoding cell cycle related targets of E2F transcription factors.	15	0.075	2.55e-19	6.37e-18
HALLMARK_MITOTIC_SPINDLE	199	Genes important for mitotic spindle assembly.	8	0.0402	1.17e-08	1.95e-07
HALLMARK_INTERFERON_ALPHA_RESPONSE	97	Genes up-regulated in response to alpha interferon proteins.	6	0.0619	6.68e-08	8.35e-07
HALLMARK_INTERFERON_GAMMA_RESPONSE	200	Genes up-regulated in response to IFNG [GeneID=3458].	7	0.035	2.57e-07	2.57e-06
HALLMARK_GLYCOLYSIS	200	Genes encoding proteins involved in glycolysis and gluconeogenesis.	4	0.02	0.000909	0.00757
HALLMARK_APOPTOSIS	161	Genes mediating programmed cell death (apoptosis) by activation of caspases.	3	0.0186	0.00502	0.0359
Overlap Results
Collection(s):	CP:KEGG
# overlaps shown:	4
# genesets in collections:	186
# genes in comparison (n):	86
# genes in universe (N):	40312
Gene Set Name	# Genes in Gene Set (K)	Description	# Genes in Overlap (k)	k/K	p-value	FDR q-value
KEGG_CELL_CYCLE	125	Cell cycle	5	0.04	7.53e-06	0.0014
KEGG_PROGESTERONE_MEDIATED_OOCYTE_MATURATION	85	Progesterone-mediated oocyte maturation	4	0.0471	3.43e-05	0.00319
KEGG_BASE_EXCISION_REPAIR	35	Base excision repair	3	0.0857	5.84e-05	0.00362
KEGG_OOCYTE_MEIOSIS	113	Oocyte meiosis	4	0.0354	0.000104	0.00484
Overlap Results
Collection(s):	CP:REACTOME
# overlaps shown:	50
# genesets in collections:	1604
# genes in comparison (n):	86
# genes in universe (N):	40312
Gene Set Name	# Genes in Gene Set (K)	Description	# Genes in Overlap (k)	k/K	p-value	FDR q-value
REACTOME_CELL_CYCLE	693	Cell Cycle	24	0.0346	1.37e-22	2.2e-19
REACTOME_CELL_CYCLE_MITOTIC	561	Cell Cycle, Mitotic	22	0.0392	7.1e-22	5.69e-19
REACTOME_CELL_CYCLE_CHECKPOINTS	292	Cell Cycle Checkpoints	13	0.0445	6.28e-14	3.36e-11
REACTOME_INTERFERON_ALPHA_BETA_SIGNALING	73	Interferon alpha/beta signaling	8	0.1096	3.69e-12	1.48e-09
REACTOME_M_PHASE	417	M Phase	13	0.0312	5.67e-12	1.82e-09
REACTOME_DNA_REPAIR	332	DNA Repair	12	0.0361	7.08e-12	1.83e-09
REACTOME_RESOLUTION_OF_SISTER_CHROMATID_COHESION	126	Resolution of Sister Chromatid Cohesion	9	0.0714	8e-12	1.83e-09
REACTOME_MITOTIC_PROMETAPHASE	203	Mitotic Prometaphase	10	0.0493	2.13e-11	4.27e-09
REACTOME_SIGNALING_BY_RHO_GTPASES_MIRO_GTPASES_AND_RHOBTB3	717	Signaling by Rho GTPases, Miro GTPases and RHOBTB3	15	0.0209	3.31e-11	5.9e-09
REACTOME_MITOTIC_METAPHASE_AND_ANAPHASE	236	Mitotic Metaphase and Anaphase	10	0.0424	9.37e-11	1.5e-08
REACTOME_RHO_GTPASE_EFFECTORS	324	RHO GTPase Effectors	11	0.034	1.09e-10	1.59e-08
REACTOME_HOMOLOGY_DIRECTED_REPAIR	138	Homology Directed Repair	8	0.058	6.51e-10	8.7e-08
REACTOME_DNA_DOUBLE_STRAND_BREAK_REPAIR	167	DNA Double-Strand Break Repair	8	0.0479	2.95e-09	3.65e-07
REACTOME_MITOTIC_SPINDLE_CHECKPOINT	111	Mitotic Spindle Checkpoint	7	0.0631	4.45e-09	5.1e-07
REACTOME_SEPARATION_OF_SISTER_CHROMATIDS	191	Separation of Sister Chromatids	8	0.0419	8.48e-09	9.07e-07
REACTOME_INTERFERON_SIGNALING	203	Interferon Signaling	8	0.0394	1.36e-08	1.37e-06
REACTOME_RHO_GTPASES_ACTIVATE_FORMINS	140	RHO GTPases Activate Formins	7	0.05	2.24e-08	2.11e-06
REACTOME_S_PHASE	162	S Phase	7	0.0432	6.12e-08	5.45e-06
REACTOME_SUMOYLATION	187	SUMOylation	7	0.0374	1.63e-07	1.37e-05
REACTOME_DNA_STRAND_ELONGATION	32	DNA strand elongation	4	0.125	6.63e-07	5.32e-05
REACTOME_HDR_THROUGH_MMEJ_ALT_NHEJ	10	HDR through MMEJ (alt-NHEJ)	3	0.3	1.11e-06	8.5e-05
REACTOME_UNWINDING_OF_DNA	12	Unwinding of DNA	3	0.25	2.03e-06	0.000148
REACTOME_SUMOYLATION_OF_DNA_REPLICATION_PROTEINS	46	SUMOylation of DNA replication proteins	4	0.087	2.94e-06	0.000205
REACTOME_CYTOKINE_SIGNALING_IN_IMMUNE_SYSTEM	719	Cytokine Signaling in Immune system	10	0.0139	3.2e-06	0.000214
REACTOME_DNA_REPLICATION	128	DNA Replication	5	0.0391	8.46e-06	0.000543
REACTOME_CHROMOSOME_MAINTENANCE	140	Chromosome Maintenance	5	0.0357	1.31e-05	0.000806
REACTOME_CYCLIN_A_B1_B2_ASSOCIATED_EVENTS_DURING_G2_M_TRANSITION	25	Cyclin A/B1/B2 associated events during G2/M transition	3	0.12	2.08e-05	0.00124
REACTOME_G0_AND_EARLY_G1	27	G0 and Early G1	3	0.1111	2.64e-05	0.00151
REACTOME_G2_M_CHECKPOINTS	168	G2/M Checkpoints	5	0.0298	3.14e-05	0.00174
REACTOME_APC_C_MEDIATED_DEGRADATION_OF_CELL_CYCLE_PROTEINS	88	APC/C-mediated degradation of cell cycle proteins	4	0.0455	3.93e-05	0.0021
REACTOME_BASE_EXCISION_REPAIR	91	Base Excision Repair	4	0.044	4.48e-05	0.00232
REACTOME_POST_TRANSLATIONAL_PROTEIN_MODIFICATION	1435	Post-translational protein modification	12	0.0084	5.31e-05	0.00266
REACTOME_POLB_DEPENDENT_LONG_PATCH_BASE_EXCISION_REPAIR	8	POLB-Dependent Long Patch Base Excision Repair	2	0.25	0.000125	0.00607
REACTOME_DNA_DAMAGE_BYPASS	48	DNA Damage Bypass	3	0.0625	0.000151	0.00714
REACTOME_TP53_REGULATES_TRANSCRIPTION_OF_CELL_CYCLE_GENES	49	TP53 Regulates Transcription of Cell Cycle Genes	3	0.0612	0.000161	0.00737
REACTOME_CONDENSATION_OF_PROMETAPHASE_CHROMOSOMES	11	Condensation of Prometaphase Chromosomes	2	0.1818	0.000244	0.0106
REACTOME_ESTABLISHMENT_OF_SISTER_CHROMATID_COHESION	11	Establishment of Sister Chromatid Cohesion	2	0.1818	0.000244	0.0106
REACTOME_MITOTIC_PROPHASE	143	Mitotic Prophase	4	0.028	0.000257	0.0109
REACTOME_MITOTIC_G1_PHASE_AND_G1_S_TRANSITION	149	Mitotic G1 phase and G1/S transition	4	0.0268	0.000301	0.0124
REACTOME_CHK1_CHK2_CDS1_MEDIATED_INACTIVATION_OF_CYCLIN_B_CDK1_COMPLEX	13	Chk1/Chk2(Cds1) mediated inactivation of Cyclin B:Cdk1 complex	2	0.1538	0.000346	0.0139
REACTOME_RHO_GTPASE_CYCLE	444	RHO GTPase cycle	6	0.0135	0.000386	0.0151
REACTOME_DEPOLYMERISATION_OF_THE_NUCLEAR_LAMINA	15	Depolymerisation of the Nuclear Lamina	2	0.1333	0.000464	0.0177
REACTOME_GLYCOLYSIS	72	Glycolysis	3	0.0417	0.000503	0.0188
REACTOME_DEPOSITION_OF_NEW_CENPA_CONTAINING_NUCLEOSOMES_AT_THE_CENTROMERE	73	Deposition of new CENPA-containing nucleosomes at the centromere	3	0.0411	0.000523	0.0189
REACTOME_TRANSCRIPTION_OF_E2F_TARGETS_UNDER_NEGATIVE_CONTROL_BY_P107_RBL1_AND_P130_RBL2_IN_COMPLEX_WITH_HDAC1	16	Transcription of E2F targets under negative control by p107 (RBL1) and p130 (RBL2) in complex with HDAC1	2	0.125	0.000529	0.0189
REACTOME_CONDENSATION_OF_PROPHASE_CHROMOSOMES	74	Condensation of Prophase Chromosomes	3	0.0405	0.000545	0.019
REACTOME_TP53_REGULATES_TRANSCRIPTION_OF_GENES_INVOLVED_IN_G2_CELL_CYCLE_ARREST	18	TP53 Regulates Transcription of Genes Involved in G2 Cell Cycle Arrest	2	0.1111	0.000673	0.023
REACTOME_INITIATION_OF_NUCLEAR_ENVELOPE_NE_REFORMATION	19	Initiation of Nuclear Envelope (NE) Reformation	2	0.1053	0.000751	0.0251
REACTOME_MITOTIC_G2_G2_M_PHASES	200	Mitotic G2-G2/M phases	4	0.02	0.000909	0.0297
REACTOME_CILIUM_ASSEMBLY	202	Cilium Assembly	4	0.0198	0.000943	0.0302
